# Supplementary material for: An integrated targeted metabolome of phytohormones and transcriptomics analysis provides insight into the new generation of crops: Polygonatum kingianum var. grandifolium and Polygonatum kingianum
Source: Front Plant Sci. 2024 Sep 24;15:1464731. doi: 10.3389/fpls.2024.1464731 (PMC11458434; doi:10.3389/fpls.2024.1464731)
Supplement: Supplementary file 3 [file Table1.xlsx]

## Sheet: Sheet1
Supplementary Table S1 All Primers used in qRT-PCR
Frimer name	Sequence
Cluster-121932.4-F	ATTCCAGGAACTGCATTCCACC
Cluster-121932.4-R	CTCATCAACCGAATCCAACAGG
Cluster-65218.0-F	AGTCCCAGCACCTCCATTATCACCA
Cluster-65218.0-R	CTCACAGTTGCGTGCAGTCCTTCTT
Cluster-50859.156-F	CCTGTGATGCCTTGCTTTCTAA
Cluster-50859.156-R	TGTCAGTGCTTGCAGTTGCTG
Cluster-56959.5-F	GCTCTGTGCGAACACCTCGTCCAT
Cluster-56959.5-R	CAGCCCTCAACTGCATCAGCCTCT
Cluster-43519.6-F	CACAGAGCAGAAGAAACGGATTG
Cluster-43519.6-R	CATTCGGTTGTTACCAAAGTCGT
Cluster-51816.7-F	CCACCGTACTGCTCAACGAAA
Cluster-51816.7-R	AACAGGGCTTCCCAGCTAATG
Cluster-134234.3-F	TGATGTTACCGTTGAGCAGTGC
Cluster-134234.3-R	CACAAGAAAGGCGTATTGTCCC
Cluster-34991.425-F	ATTTCGGCACCATTGGTAGGTATA
Cluster-34991.425-R	GCCTCAAGGTTTAAGCAGCTCTAT
Cluster-21187.19-F	ATTACCCTGGCCGACATATCC
Cluster-21187.19-R	ACACTTCTCACGCATTCTACACG
Cluster-17204.18-F	TGGCTATGAAAGCGAGGTAAGT
Cluster-17204.18-R	AAACCGAGGAAGGTAAAGCAC
Cluster-65621.3-F	AGGAGGAAGTCGGCACTGAAGGTTT
Cluster-65621.3-R	GAAAGGGTAATCCGCATTGGTGAAA
elongation factor 1-α-F	TGAAATCGTGAAGGAAGTCTCT
elongation factor 1-α-R	TCTCAATCATGTTGTCACCTTC
