# Supplementary material for: An integrated targeted metabolome of phytohormones and transcriptomics analysis provides insight into the new generation of crops: Polygonatum kingianum var. grandifolium and Polygonatum kingianum
Source: Front Plant Sci. 2024 Sep 24;15:1464731. doi: 10.3389/fpls.2024.1464731 (PMC11458434; doi:10.3389/fpls.2024.1464731)
Supplement: Supplementary file 4 [file Table2.xlsx]

## Sheet: sheet1
Supplementary Table S2 The relative content of phytohormones identified in bud, root and rhizome of XHJ and DHJ
Index	Compounds	Class	D-bud1	D-bud2	D-bud3	D-root1	D-root2	D-root3	D-rhizome1	D-rhizome2	D-rhizome3	X-bud1	X-bud2	X-bud3	X-root1	X-root2	X-root3	X-rhizome1	X-rhizome2	X-rhizome3
cZ	cis-Zeatin	CTK	-0.43402679229596103	-0.43402679229596103	-0.43402679229596103	-0.43402679229596103	-0.43402679229596103	-0.43402679229596103	-0.43402679229596103	-0.43402679229596103	-0.43402679229596103	-0.43402679229596103	-0.43402679229596103	-0.43402679229596103	2.332111227515747	2.0320840930810253	2.146206563842644	-0.43402679229596103	-0.43402679229596103	-0.43402679229596103
cZR	cis-Zeatin riboside	CTK	2.605510515320797	1.6914954629019727	2.141599552159581	-0.42924036869215676	-0.42924036869215676	-0.42924036869215676	-0.42924036869215676	-0.42924036869215676	-0.42924036869215676	-0.42924036869215676	-0.42924036869215676	-0.42924036869215676	-0.42924036869215676	-0.42924036869215676	-0.42924036869215676	-0.42924036869215676	-0.42924036869215676	-0.42924036869215676
iP7G	N6-Isopentenyl-adenine-7-glucoside	CTK	-0.43443305052574505	-0.43443305052574505	-0.43443305052574505	-0.43443305052574505	-0.43443305052574505	-0.43443305052574505	-0.43443305052574505	-0.43443305052574505	-0.43443305052574505	-0.43443305052574505	-0.43443305052574505	-0.43443305052574505	2.087071836165647	2.174389010245569	2.255034911474961	-0.43443305052574505	-0.43443305052574505	-0.43443305052574505
mTR	meta-Topolin riboside	CTK	-0.43414272826439176	-0.43414272826439176	-0.43414272826439176	2.28813203905587	2.2018031461593064	2.0222057387506993	-0.43414272826439176	-0.43414272826439176	-0.43414272826439176	-0.43414272826439176	-0.43414272826439176	-0.43414272826439176	-0.43414272826439176	-0.43414272826439176	-0.43414272826439176	-0.43414272826439176	-0.43414272826439176	-0.43414272826439176
pT	para-Topolin	CTK	-0.43458921965914843	-0.43458921965914843	-0.43458921965914843	2.1375753944072087	2.187293486462449	2.1939694140175696	-0.43458921965914843	-0.43458921965914843	-0.43458921965914843	-0.43458921965914843	-0.43458921965914843	-0.43458921965914843	-0.43458921965914843	-0.43458921965914843	-0.43458921965914843	-0.43458921965914843	-0.43458921965914843	-0.43458921965914843
DZ	Dihydrozeatin	CTK	-0.6775132237564834	-0.6775132237564834	-0.6775132237564834	-0.6775132237564834	-0.6775132237564834	-0.6775132237564834	-0.6775132237564834	-0.6775132237564834	-0.6775132237564834	-0.6775132237564834	-0.6775132237564834	-0.6775132237564834	1.8485140300703489	1.4595172480550087	1.062642457228446	1.1255861398732097	1.117386579681938	1.5165122301688494
mT9G	meta-Topolin-9-glucoside	CTK	2.31375879039903	1.831817096214584	2.342016758531871	-0.43250617634303234	-0.43250617634303234	-0.43250617634303234	-0.43250617634303234	-0.43250617634303234	-0.43250617634303234	-0.43250617634303234	-0.43250617634303234	-0.43250617634303234	-0.43250617634303234	-0.43250617634303234	-0.43250617634303234	-0.43250617634303234	-0.43250617634303234	-0.43250617634303234
BAP9G	N6-Benzyladenine-9-glucoside	CTK	-0.6728671251558329	-0.6728671251558329	-0.6728671251558329	-0.6728671251558329	-0.6728671251558329	-0.6728671251558329	-0.6728671251558329	-0.6728671251558329	-0.6728671251558329	1.294099736197529	0.7702848642620709	1.0627248248506367	-0.6728671251558329	-0.6728671251558329	-0.6728671251558329	1.639201298884419	1.727717608794368	1.5803771688809716
KR	Kinetin riboside	CTK	-0.43386805033420245	-0.43386805033420245	-0.43386805033420245	-0.43386805033420245	-0.43386805033420245	-0.43386805033420245	-0.43386805033420245	-0.43386805033420245	-0.43386805033420245	-0.43386805033420245	-0.43386805033420245	-0.43386805033420245	2.126878595058954	2.3572471917994298	2.0238949681546514	-0.43386805033420245	-0.43386805033420245	-0.43386805033420245
cZROG	cis-Zeatin-O-glucoside riboside	CTK	-0.5265417859446271	-0.5324253262476387	-0.45361113743321885	0.8337529331084026	0.7161578807859776	0.8933307227690271	0.0937298192192219	-0.015850487643220654	0.34945928730814735	-1.3957401735423314	-1.392078742881659	-1.3824479176817939	1.6502721714351078	1.44630775751431	1.5358234243562676	-0.6305314669569119	-0.4946949145705575	-0.6949120435945014
tZOG	trans-Zeatin-O-glucoside	CTK	-0.16634157119033088	-0.32865629690775483	-0.35573012339277865	1.3554539699606816	1.1917850779812558	1.3680695039666186	-0.5972858381443893	-0.5666636329886131	-0.6103044755663279	-0.9738366718423549	-1.0251091704034259	-0.9896016368083624	1.4501405283234547	1.3072543186473626	1.3510382362225095	-0.8274721368137551	-0.7397285746956611	-0.843011506348127
tZR	trans-Zeatin riboside	CTK	-1.0600695978158754	-1.1041920614224705	-1.0663070723929375	1.808146170816788	1.0199747931119552	1.5165697977595316	-0.392097422821477	-0.3136177222002446	-0.11570572148051113	-0.41582027695063134	-0.34577650506067154	-0.3447028414039642	1.011692244903069	1.28593661893062	1.1296929934592939	-0.8408888313251761	-0.9145114820708273	-0.8583230840364727
BAP7G	N6-Benzyladenine-7-glucoside	CTK	1.4208578003718793	1.3257409902559565	1.2961753743229432	0.2142427775514165	0.5055063310857875	0.37237658619884756	-0.7582125670795812	-0.6727257004389828	-0.6350506584214858	0.9251691309578166	0.8167055570778476	0.8596179367749067	-1.5267496349611671	-1.5267496349611671	-1.5267496349611671	-0.47387581499237325	-0.26674755708452014	-0.3495312816969572
IPR	N6-isopentenyladenosine	CTK	-0.8205982429023242	-0.868825405976833	-0.8092012765041193	0.9191786698004809	0.7547624334979576	0.8924857748152116	0.16194022869028185	0.11329317738004961	-0.0024160235785668253	-1.013686847301384	-1.013686847301384	-1.013686847301384	1.6863144764670157	1.591359751159867	1.6136738116868785	-0.682634965450371	-0.7359607713872346	-0.7723110957941406
iP9G	N6-Isopentenyl-adenine-9-glucoside	CTK	-0.46892319820168116	-0.4620880048173343	-0.4567283452429417	0.6427613334391322	0.581092699793692	0.5957395427601496	-0.6207512874406483	-0.6188417730983546	-0.616020899638148	-0.7718199107480216	-0.7718199107480216	-0.7718199107480216	1.9771646742765667	1.5585036547286701	2.1665754776161332	-0.6762573975268679	-0.6434484692820033	-0.6433182751223014
tZ	trans-Zeatin	CTK	0.1097033087199164	0.06295516532731835	0.12948136938601557	2.3381063939968874	1.6146339248585546	2.0150272780023695	-0.36171126227034556	-0.4049757699774375	-0.3480014702177086	0.006655117635751899	0.0010363504010646243	-0.01761795681809721	-0.8380703484271322	-0.8278441920600015	-0.8255966851661265	-0.8845937411303428	-0.8845937411303428	-0.8845937411303428
oT	ortho-Topolin	CTK	1.8883823703158924	1.0223630277468478	0.8943427771062064	-0.6690104013053911	-0.6690104013053911	-0.6690104013053911	-0.6690104013053911	-0.6690104013053911	-0.6690104013053911	1.1164955649826134	1.2829218908154472	1.8236191846976855	-0.6690104013053911	-0.6690104013053911	-0.6690104013053911	-0.6690104013053911	-0.6690104013053911	-0.6690104013053911
IP	N6-isopentenyladenine	CTK	0.3819415544279595	0.9175838088317088	0.10568740584839312	0.043457523957838036	0.29470340224493885	-0.24733631665223188	1.2857288110440577	1.1031102791409333	1.8766218951637201	-1.1051781464519386	-1.123788952250983	-1.0429482645613837	0.5663048493747443	0.4226526921133697	0.43777397182509314	-1.3750348305380837	-1.0749355870284913	-1.4663440964896455
2CltZ	2-Chloro-trans-zeatin	CTK	-0.45090421280899873	-0.3626271326088677	-0.4404065613938358	1.704284799542368	1.4766219005231545	1.4490617839836344	-1.0619824850428865	-1.0619824850428865	-1.0619824850428865	0.0976661419781754	0.11922414312643222	0.13039340221138362	0.9966402353280763	1.0720478604503676	0.5798925499254295	-1.0619824850428865	-1.0619824850428865	-1.0619824850428865
DHZROG	Dihydrozeatin-O-glucoside riboside	CTK	1.2197646103180992	0.9041515326977135	0.8997422323486053	0.4506898020578358	0.4495294598607022	0.7363660509921702	0.676260325180641	0.4086854145215935	0.6122094358988569	-1.399823933931102	-1.2557094330470877	-1.3891487857174714	0.48874902612382354	0.6207959681576467	0.6198676943999397	-1.4095708083870255	-1.2390005054083615	-1.3935580860665797
cZ9G	cis-Zeatin-9-glucoside	CTK	-0.11442805556922783	-0.1263595734370654	-0.10933898522416444	2.2915475546262676	1.9461322506172198	2.1802294864901337	-0.3638780330713665	-0.37183237831659155	-0.3143985844223052	-0.5575192979658777	-0.5575192979658777	-0.5575192979658777	-0.5575192979658777	-0.5575192979658777	-0.5575192979658777	-0.5575192979658777	-0.5575192979658777	-0.5575192979658777
DHZ7G	Dihydrozeatin-7-glucoside	CTK	-0.6110993375478698	-0.6110993375478698	-0.6110993375478698	0.34076009610925256	0.42760494145529226	0.6452560917915049	-0.6110993375478698	-0.6110993375478698	-0.6110993375478698	-0.6110993375478698	-0.6110993375478698	-0.6110993375478698	1.825188057226365	1.834970580035459	2.259412283956564	-0.6110993375478698	-0.6110993375478698	-0.6110993375478698
BAP	6-Benzyladenine	CTK	-0.6194470484552529	-0.6194470484552529	-0.6194470484552529	1.9120484442429806	1.9464485572099601	2.0161308373225597	-0.6194470484552529	-0.6194470484552529	-0.6194470484552529	-0.6194470484552529	-0.6194470484552529	-0.6194470484552529	0.3056807759088576	0.6879042533197407	0.5651517134589379	-0.6194470484552529	-0.6194470484552529	-0.6194470484552529
2MeScZR	2-Methylthio-cis-zeatin riboside	CTK	1.0959000165642052	0.9312493543231215	1.045103535660041	1.634693034706304	1.6409988047495796	1.73908856097831	-0.6739194422484635	-0.6739194422484635	-0.6739194422484635	-0.6739194422484635	-0.6739194422484635	-0.6739194422484635	-0.6739194422484635	-0.6739194422484635	-0.6739194422484635	-0.6739194422484635	-0.6739194422484635	-0.6739194422484635
IAA-Val-Me	Indole-3-acetyl-L-valine methyl ester	Auxin	0.5279439028133519	0.9429624106782373	0.5432206577040839	1.5438481030470286	2.2448814108106188	1.339309329232228	-0.44043261553804763	-0.4260045692523563	-0.5108754297564227	-0.02711152488324354	-0.13235139190828604	-0.02201927325299946	-1.2102113203099312	-1.2102113203099312	-1.2102113203099312	-0.657702018428458	-0.6390304291175634	-0.6560046012183767
ICA	Indole-3-carboxylic acid	Auxin	-0.5535725896991045	-0.5535725896991045	-0.5535725896991045	2.053085623600658	2.1352028158360965	2.123486328967082	-0.5535725896991045	-0.5535725896991045	-0.5535725896991045	0.15234574415902144	0.0947472232865397	0.08400334053985654	-0.5535725896991045	-0.5535725896991045	-0.5535725896991045	-0.5535725896991045	-0.5535725896991045	-0.5535725896991045
IA	3-Indoleacrylic acid	Auxin	0.42677886398787257	0.5325175827526363	0.6126951386950096	1.9528493687084263	1.9400023601589191	1.9881487500073303	-0.6210826720258495	-0.6210826720258495	-0.6210826720258495	-0.6210826720258495	-0.6210826720258495	-0.6210826720258495	-0.6210826720258495	-0.6210826720258495	-0.6210826720258495	-0.6210826720258495	-0.6210826720258495	-0.6210826720258495
IAA-Glu	Indole-3-acetyl glutamic acid	Auxin	-0.46265995943564703	-0.46265995943564703	-0.46265995943564703	-0.46265995943564703	-0.46265995943564703	-0.46265995943564703	-0.46265995943564703	-0.46265995943564703	-0.46265995943564703	-0.2770730053460916	-0.33391963444154105	-0.31555678358762723	2.479093308724683	2.0065779227073057	1.9927977051710353	-0.46265995943564703	-0.46265995943564703	-0.46265995943564703
TRP	L-tryptophan	Auxin	0.3300827945151242	0.24817807394583372	0.44182579337572975	-0.8845820592266997	-0.9117381980513317	-0.9855897901191133	0.6774187316373386	0.6692835038972388	0.5729120550965952	-0.786535882887695	-0.6764374231327124	-0.8125803128929566	-0.9715407317551291	-0.9901409293114766	-0.9125874941415489	1.6387443134839248	1.5969320464392027	1.7563555091276755
TRA	Tryptamine	Auxin	-0.45861544792055875	-0.4583656105773974	-0.4583480988122289	2.0942321072124597	2.1959288043754537	2.2199513251097343	-0.45913255804958697	-0.4594710057725283	-0.456503961535199	-0.4606849993525249	-0.4606385104921599	-0.4607979057164246	-0.32962207267429594	-0.3371280986011041	-0.33161340206175155	-0.45948882282754955	-0.4599060014114226	-0.459795740892914
IAA-Ala	N-(3-Indolylacetyl)-L-alanine	Auxin	-0.4328513219437276	-0.4328513219437276	-0.4328513219437276	-0.4328513219437276	-0.4328513219437276	-0.4328513219437276	1.9758008017839177	2.463792320313725	2.0531767070582725	-0.4328513219437276	-0.4328513219437276	-0.4328513219437276	-0.4328513219437276	-0.4328513219437276	-0.4328513219437276	-0.4328513219437276	-0.4328513219437276	-0.4328513219437276
IAA-Gly	Indole-3-acetyl glycine	Auxin	-0.6000148662187593	-0.6000148662187593	-0.6000148662187593	-0.6000148662187593	-0.6000148662187593	-0.6000148662187593	-0.6000148662187593	-0.6000148662187593	-0.6000148662187593	0.39512060559870493	0.37682957326078315	0.4286972118159429	2.3543390585187405	1.8976267735316825	1.747565171899258	-0.6000148662187593	-0.6000148662187593	-0.6000148662187593
IAA-Glc	1-O-indol-3-ylacetylglucose	Auxin	-0.4344279298244636	-0.4344279298244636	-0.4344279298244636	-0.4344279298244636	-0.4344279298244636	-0.4344279298244636	-0.4344279298244636	-0.4344279298244636	-0.4344279298244636	-0.4344279298244636	-0.4344279298244636	-0.4344279298244636	2.212627199571239	2.229532135872374	2.074259611923341	-0.4344279298244636	-0.4344279298244636	-0.4344279298244636
IAM	3-Indole acetamide	Auxin	1.2039469883909981	0.8564257470178777	1.4966824755030679	0.8691650580822579	1.0158798303228234	1.0537619293051272	0.671000484741613	0.6456785852445766	0.7800122695789871	-0.9547281520208145	-0.9547281520208145	-0.9547281520208145	-0.9547281520208145	-0.9547281520208145	-0.9547281520208145	-0.9547281520208145	-0.9547281520208145	-0.9547281520208145
OxIAA	2-oxindole-3-acetic acid	Auxin	-0.4386774533969809	-0.43848833203710347	-0.43891858507731873	-0.4156767067008939	-0.4193856732137807	-0.4200213981637186	-0.43573283615948194	-0.43618204805154165	-0.4071312475437639	-0.4403325572700129	-0.4364835599766653	-0.4380330860135533	2.248396395076503	2.298494246223256	1.959016188639246	-0.4469008845819195	-0.4466643855573712	-0.4472780761948986
IAA-Asp	Indole-3-acetyl-L-aspartic acid	Auxin	-0.7169179014467363	-0.725854741759937	-0.6881810769623433	0.499039397660419	0.15019387992969857	1.250938762667159	-0.7552593962189177	-0.7477555378109878	-0.7035344545188186	-0.2121525422621586	-0.3908692129490511	-0.2878656681750849	1.863328781575488	1.8015662546794509	1.8517709603067447	-0.7168843421515309	-0.7185891543479658	-0.7529740082154293
IAA	Indole-3-acetic acid	Auxin	-0.81686268220940506	-0.8567999094621255	-0.8448848703438536	0.17979274881381418	0.02008713859060999	0.5456517596783282	-0.5345624590563781	-0.7392240196495133	-0.6301661822491709	1.7301452041551078	2.198543616747728	1.9392626036256408	-0.1015549010102989	0.17875357790954455	-0.05019860257088988	-0.8199054061071335	-0.5525157109290038	-0.845561905932999
ICAld	Indole-3-carboxaldehyde	Auxin	-0.4218047525616262	-0.37649495990301374	-0.4041089540060976	0.6328732495673468	0.5934737345098383	0.7319220749013213	-0.7498444282591841	-0.7669516514519472	-0.7497918768875087	-0.5724660317304942	-0.5512703118213775	-0.563150425244818	1.7797228541903607	1.7042135399422305	2.132055277301111	-0.803047436943456	-0.7974875018201887	-0.8178423997824973
IAA-Leu	N-(3-Indolylacetyl)-L-leucine	Auxin	0.4395954047298642	0.44462510043615555	0.36716778655926874	-0.8570601483520464	-0.8570601483520464	-0.8570601483520464	-0.8570601483520464	-0.8570601483520464	-0.8570601483520464	1.4455345459881346	1.4716889636608497	2.2442502241472013	-0.8570601483520464	-0.8570601483520464	-0.8570601483520464	0.38024499539562623	0.4989458140641022	0.4214885001872154
MEIAA	Methyl indole-3-acetate	Auxin	-0.4933110642058686	-0.4475340699377278	-0.5878766971018964	0.6974261902075248	0.6049352456482113	0.6167141213663293	-0.9096541655832138	-0.8994815001902936	-0.9081148806882323	-0.031994073722981846	-0.12615815403771008	-0.044375278313049105	1.7506316855258464	2.059024067963848	1.5740824006145082	-0.9617890757219296	-0.9406406397734903	-0.9518841120498757
IAN	3-Indoleacetonitrile	Auxin	-0.12164267697284122	-0.200345608583588	-0.15274109979775624	1.7860063446985868	1.2726431494503725	0.8595125631532308	-0.26278167287053283	-0.4005716078486183	-0.40858543219196186	-0.5409929478349659	-0.6620375782150201	-0.6078545569085333	1.2683372139823075	0.6603630477552166	1.5476249728137565	-1.3778993497808547	-1.367493339066364	-1.2915414217824366
IAA-Val	N-(3-Indolylacetyl)-L-valine	Auxin	-0.434270730469836	-0.434270730469836	-0.434270730469836	2.183726944400556	2.049897123844871	2.2804368888021127	-0.434270730469836	-0.434270730469836	-0.434270730469836	-0.434270730469836	-0.434270730469836	-0.434270730469836	-0.434270730469836	-0.434270730469836	-0.434270730469836	-0.434270730469836	-0.434270730469836	-0.434270730469836
GA15	Gibberellin A15	GA	-0.4330275925213859	-0.4330275925213859	-0.4330275925213859	-0.4330275925213859	-0.4330275925213859	-0.4330275925213859	-0.4330275925213859	-0.4330275925213859	-0.4330275925213859	2.193295528250046	1.9034202313064295	2.398698128264313	-0.4330275925213859	-0.4330275925213859	-0.4330275925213859	-0.4330275925213859	-0.4330275925213859	-0.4330275925213859
GA20	Gibberellin A20	GA	-0.5975068717249662	-0.5975068717249662	-0.5975068717249662	-0.5975068717249662	-0.5975068717249662	-0.5975068717249662	-0.5975068717249662	-0.5975068717249662	-0.5975068717249662	0.43598424028701155	0.601672144983666	0.3648728628782784	2.5827430364673014	1.9722294578115227	1.2125807182718145	-0.5975068717249662	-0.5975068717249662	-0.5975068717249662
GA53	Gibberellin A53	GA	-0.6473356527318012	-0.6473356527318012	-0.6473356527318012	0.7488042753617598	0.5522493545281331	0.9304524635576253	-0.6473356527318012	-0.6473356527318012	-0.6473356527318012	-0.6473356527318012	-0.6473356527318012	-0.6473356527318012	1.9394359408657846	1.866088304766724	1.730997493701587	-0.6473356527318012	-0.6473356527318012	-0.6473356527318012
GA4	Gibberellin A4	GA	-0.43439938768103187	-0.43439938768103187	-0.43439938768103187	-0.43439938768103187	-0.43439938768103187	-0.43439938768103187	-0.43439938768103187	-0.43439938768103187	-0.43439938768103187	2.106466100984586	2.1329847755476288	2.276539938683263	-0.43439938768103187	-0.43439938768103187	-0.43439938768103187	-0.43439938768103187	-0.43439938768103187	-0.43439938768103187
GA7	Gibberellin A7	GA	-0.601754122115295	-0.601754122115295	-0.601754122115295	-0.601754122115295	-0.601754122115295	-0.601754122115295	-0.601754122115295	-0.601754122115295	-0.601754122115295	1.6870858232970705	2.6745452117307655	1.388502685491449	0.4393210279972936	0.5490881248230792	0.4825065920438823	-0.601754122115295	-0.601754122115295	-0.601754122115295
GA3	Gibberellin A3	GA	0.33971861986111984	0.2497868747288488	0.33855856663766914	-1.0429911683191622	-1.0429911683191622	-1.0429911683191622	-1.0429911683191622	-1.0429911683191622	-1.0429911683191622	0.369530146349479	0.6876977598098621	0.3156337053170964	1.747157796598453	1.620527859810036	1.8074437371314296	-0.324623606311527	-0.3432396985164258	-0.5502447515010677
GA19	Gibberellin A19	GA	0.5517281251324311	0.4755907284132147	0.6252482346902294	-1.1667313056986517	-1.1667313056986517	-1.1667313056986517	0.2160071613566357	0.1827522185997925	-0.10897779312173474	1.7452008068679086	1.119207301084003	1.807050894847148	-1.1667313056986517	-1.1667313056986517	-1.1667313056986517	0.3925354824908771	0.22183704021030437	-0.22779236637889966
GA24	Gibberellin A24	GA	-0.3070108764787683	-0.34216589473979464	-0.3720904634013748	-0.7836967435707483	-0.7836967435707483	-0.7836967435707483	-0.29656879184678026	-0.379033038589129	-0.37045359608068473	1.8425251705080523	2.069767509580397	2.162269327766288	-0.7836967435707483	-0.7836967435707483	-0.7836967435707483	0.250869254089508	0.42265565721088955	0.021416203405886215
GA9	Gibberellin A9	GA	-0.44198964007565195	-0.41679744730947543	-0.40739633020354304	-0.520489843246976	-0.520489843246976	-0.520489843246976	-0.47294154890859147	-0.48407583285528244	-0.4699829105642664	2.3142708388033086	2.097975118423802	2.06353936917358	-0.520489843246976	-0.520489843246976	-0.520489843246976	-0.22273528135181997	-0.21900634663382443	-0.2179209290163797
H2JA	Dihydrojasmonic acid	JA	1.018622227034467	0.475235919182337	0.4888205768786403	-0.8262673337241739	-0.9986312074260818	-0.8201945575211232	-0.8108775913750743	-0.8898733063350842	-0.8002517837797466	0.7719645427258813	0.703371325919616	0.7635842356264725	1.7085987772057927	1.9471304790567718	0.09199349614548594	-0.9848418494083274	-0.8834097386092633	-0.9549742115965922
OPC-6	3-oxo-2-(2-(Z)-Pentenyl)cyclopentane-1-hexanoic acid	JA	0.4375789626222033	0.5014516899053978	0.43983577457484097	-0.7965636170047746	-0.845652495270304	-0.8329781317816982	-0.8923578322518458	-0.9080282144475088	-0.904579345782152	0.529580166121268	0.12962840386657207	0.8626114035844159	1.9222076440411815	1.5261015305479644	1.5395657353093843	-0.9045664725995093	-0.8877681135336156	-0.9160670879018212
JA	Jasmonic acid	JA	1.3665641617817812	0.43901834863921874	1.2750337132270813	-0.14424725619479842	-0.6263650413995036	0.24800572242067886	-0.11182998465445453	-0.5667441858408767	-0.44495837774896296	-0.006495243098235391	0.05608041567311331	-0.11097434665849258	1.4443758811345588	1.7803506966289675	-0.0037172717380123876	-1.514831015139832	-1.5212711171227724	-1.557995099909458
OPDA	cis(+)-12-Oxophytodienoic acid	JA	1.1704348327586318	0.47112509125870317	0.5312459108992585	-0.27421535954569726	-0.33528607426508983	-0.20332604680505545	-0.9150598128281865	-0.9398867530950616	-0.9749363737341837	2.303637045261777	-0.49535545720886975	-0.45092750737868953	1.0395679385242431	1.144617287623826	0.9817962244913515	-0.9469174844484226	-1.044774770808239	-1.0617386907002964
OPC-4	3-oxo-2-(2-(Z)-Pentenyl) cyclopentane-1-butyric acid	JA	-0.43397414524079797	-0.43397414524079797	-0.43397414524079797	2.0421441839825167	2.1207990398283227	2.3466689548011304	-0.43397414524079797	-0.43397414524079797	-0.43397414524079797	-0.43397414524079797	-0.43397414524079797	-0.43397414524079797	-0.43397414524079797	-0.43397414524079797	-0.43397414524079797	-0.43397414524079797	-0.43397414524079797	-0.43397414524079797
JA-ILE	Jasmonoyl-L-isoleucine	JA	0.13526693271164913	-0.14188931147263026	-0.03287495289513441	0.03437318531449638	-0.24101677208785166	-0.06344033025562974	-0.6130355405114694	-0.6291690624586229	-0.6276612566691692	-0.08011235427044526	-0.5022764352347486	-0.44495827515280517	1.7806707704942506	2.779656726255384	1.3761695573492607	-0.9099009603721779	-0.9099009603721779	-0.9099009603721779
JA-Phe	N-[(-)-Jasmonoyl]-(l)-phenalanine	JA	1.0364332084312908	1.1290688217764393	0.36149527809416654	-0.3982062903904316	-0.4311492008148239	-0.4226429906486161	-0.6754042795786928	-0.6760385145472259	-0.6748446604888108	-0.7491620756251521	-0.7491620756251521	-0.7491620756251521	1.964841278545676	1.732114353033378	1.5493054503385622	-0.7491620756251521	-0.7491620756251521	-0.7491620756251521
SAG	Salicylic acid 2-O-β-glucoside	SA	1.7461415140640775	1.673798268072139	1.9487668957532613	0.36739361349493044	0.1573299240314	0.7865851933194875	0.45219216858823513	0.17226872957251765	-0.07194367707153844	-1.070476710037418	-1.0577268640028572	-1.0056685830451466	-0.6390821714312713	-0.5986075138666745	-0.5286404384925092	-0.8957964335009205	-0.4204751157300642	-1.0160587997176507
SA	Salicylic acid	SA	1.3509850148687574	1.2670630535731384	1.2928239287319108	-0.5960488988683219	-0.7120922722755788	-0.6941202528854099	0.3031797183394327	-0.16650740814818635	0.13890133904005508	1.3935950084556452	1.1231292860272952	1.0478339780989172	-0.6807379072964724	-0.7523569929860131	-0.5145793868978116	-1.2739238251196918	-1.2243466618705567	-1.3027977207871133
ABA	Abscisic acid	ABA	2.5474615854888643	1.8577361625819333	1.8144490170744196	-0.3501977719327072	-0.44764242543726757	-0.38590510082181706	-0.5513203657174857	-0.4586186838523832	-0.43366513478243746	-0.5856277310399305	-0.6096913657260697	-0.6631911531577915	0.08035757409113112	0.15224827777335226	0.08359468623834011	-0.7060362560401617	-0.6693010566073103	-0.67465025813268
ACC	1-Aminocyclopropanecarboxylic acid	ETH	0.6508396782951883	1.2309658899215776	1.2655941607512131	-1.9171102864578964	-1.5798943865327457	-1.830269672996001	0.09525477874960614	-0.2674053834015762	0.21851526904844804	0.6228125048415066	0.6890448866065042	0.44045613290453256	-0.620188982153382	-0.6624993384430146	-0.4882180867503228	0.42789610592256516	0.7579571873843326	0.9662495423094678
ST	（±）Strigol	SL	-0.43406537224362085	-0.43406537224362085	-0.43406537224362085	-0.43406537224362085	-0.43406537224362085	-0.43406537224362085	-0.43406537224362085	-0.43406537224362085	-0.43406537224362085	-0.43406537224362085	-0.43406537224362085	-0.43406537224362085	2.144666365211447	2.0384763500866114	2.327837868356254	-0.43406537224362085	-0.43406537224362085	-0.43406537224362085
