# Supplementary material for: An integrated targeted metabolome of phytohormones and transcriptomics analysis provides insight into the new generation of crops: Polygonatum kingianum var. grandifolium and Polygonatum kingianum
Source: Front Plant Sci. 2024 Sep 24;15:1464731. doi: 10.3389/fpls.2024.1464731 (PMC11458434; doi:10.3389/fpls.2024.1464731)
Supplement: Supplementary file 5 [file Table3.xlsx]

## Sheet: D-bud_vs_X-bud
Supplementary Table S3 DAPs between XHJ and DHJ (1)
Index	Compounds	Class	Fold_Change	Log2FC	Type
ABA	Abscisic acid	ABA	0.1477482681706023	-2.758786874916546	down
ICA	Indole-3-carboxylic acid	Auxin	Inf	Inf	up
IA	3-Indoleacrylic acid	Auxin	0	-Inf	down
IAA-Glu	Indole-3-acetyl glutamic acid	Auxin	Inf	Inf	up
TRP	L-tryptophan	Auxin	0.4343960402835997	-1.2029171425030316	down
TRA	Tryptamine	Auxin	0.3652835924269692	-1.4529111417783394	down
IAA-Gly	Indole-3-acetyl glycine	Auxin	Inf	Inf	up
IAM	3-Indole acetamide	Auxin	0	-Inf	down
IAA-Asp	Indole-3-acetyl-L-aspartic acid	Auxin	6.949555612803504	2.79692072809483	up
IAA	Indole-3-acetic acid	Auxin	4.469399419644166	2.160080980734371	up
IAA-Leu	N-(3-Indolylacetyl)-L-leucine	Auxin	2.0228947368421055	1.0164212499075804	up
cZR	cis-Zeatin riboside	CTK	0	-Inf	down
mT9G	meta-Topolin-9-glucoside	CTK	0	-Inf	down
BAP9G	N6-Benzyladenine-9-glucoside	CTK	Inf	Inf	up
cZROG	cis-Zeatin-O-glucoside riboside	CTK	0.08673159489505854	-3.5272985504791725	down
tZOG	trans-Zeatin-O-glucoside	CTK	0.22356584320170286	-2.161228307456276	down
tZR	trans-Zeatin riboside	CTK	2.2891005553659522	1.1947808388400485	up
IPR	N6-isopentenyladenosine	CTK	0	-Inf	down
iP9G	N6-Isopentenyl-adenine-9-glucoside	CTK	0	-Inf	down
IP	N6-isopentenyladenine	CTK	0.33211527281787223	-1.5902440260305915	down
DHZROG	Dihydrozeatin-O-glucoside riboside	CTK	0.19582838283828383	-2.3523382144581926	down
cZ9G	cis-Zeatin-9-glucoside	CTK	0	-Inf	down
2MeScZR	2-Methylthio-cis-zeatin riboside	CTK	0	-Inf	down
GA15	Gibberellin A15	GA	Inf	Inf	up
GA20	Gibberellin A20	GA	Inf	Inf	up
GA4	Gibberellin A4	GA	Inf	Inf	up
GA7	Gibberellin A7	GA	Inf	Inf	up
GA24	Gibberellin A24	GA	6.33592009111424	2.663554140202846	up
GA9	Gibberellin A9	GA	27.218533230568568	4.766517418966569	up
JA-Phe	N-[(-)-Jasmonoyl]-(l)-phenalanine	JA	0	-Inf	down
SAG	Salicylic acid 2-O-β-glucoside	SA	0.2116264687457971	-2.2404080140320106	down

## Sheet: D-rhizome_vs_X-rhizome
Supplementary Table S3 DAPs between XHJ and DHJ (2)
Index	Compounds	Class	Fold_Change	Log2FC	Type
IAA-Ala	N-(3-Indolylacetyl)-L-alanine	Auxin	0	-Inf	down
IAM	3-Indole acetamide	Auxin	0	-Inf	down
OxIAA	2-oxindole-3-acetic acid	Auxin	0.19914172747274256	-2.32813254479579	down
IAA-Leu	N-(3-Indolylacetyl)-L-leucine	Auxin	Inf	Inf	up
IAN	3-Indoleacetonitrile	Auxin	0.23911108382700513	-2.0642470881685093	down
DZ	Dihydrozeatin	CTK	Inf	Inf	up
BAP9G	N6-Benzyladenine-9-glucoside	CTK	Inf	Inf	up
IPR	N6-isopentenyladenosine	CTK	0.25654346016001156	-1.9627248462630327	down
tZ	trans-Zeatin	CTK	0	-Inf	down
IP	N6-isopentenyladenine	CTK	0.17046995695500916	-2.5524105888995234	down
DHZROG	Dihydrozeatin-O-glucoside riboside	CTK	0.23097733138468238	-2.1141768255129807	down
cZ9G	cis-Zeatin-9-glucoside	CTK	0	-Inf	down
GA3	Gibberellin A3	GA	Inf	Inf	up
GA24	Gibberellin A24	GA	2.334061387194902	1.2228425052770604	up
GA9	Gibberellin A9	GA	6.706418435099596	2.7455425003416787	up
JA	Jasmonic acid	JA	0.19922899647138878	-2.327500457415785	down
JA-ILE	Jasmonoyl-L-isoleucine	JA	0	-Inf	down
JA-Phe	N-[(-)-Jasmonoyl]-(l)-phenalanine	JA	0	-Inf	down
SA	Salicylic acid	SA	0.4647898878045425	-1.1053494137803306	down

## Sheet: D-root_vs_X-root
Supplementary Table S3 DAPs between XHJ and DHJ (3)
Index	Compounds	Class	Fold_Change	Log2FC	Type
IAA-Val-Me	Indole-3-acetyl-L-valine methyl ester	Auxin	0	-Inf	down
ICA	Indole-3-carboxylic acid	Auxin	0	-Inf	down
IA	3-Indoleacrylic acid	Auxin	0	-Inf	down
IAA-Glu	Indole-3-acetyl glutamic acid	Auxin	Inf	Inf	up
TRA	Tryptamine	Auxin	0.0490957231136268	-4.348258837566897	down
IAA-Gly	Indole-3-acetyl glycine	Auxin	Inf	Inf	up
IAA-Glc	1-O-indol-3-ylacetylglucose	Auxin	Inf	Inf	up
IAM	3-Indole acetamide	Auxin	0	-Inf	down
OxIAA	2-oxindole-3-acetic acid	Auxin	77.74568253500185	6.280690654911426	up
IAA-Val	N-(3-Indolylacetyl)-L-valine	Auxin	0	-Inf	down
cZ	cis-Zeatin	CTK	Inf	Inf	up
iP7G	N6-Isopentenyl-adenine-7-glucoside	CTK	Inf	Inf	up
mTR	meta-Topolin riboside	CTK	0	-Inf	down
pT	para-Topolin	CTK	0	-Inf	down
DZ	Dihydrozeatin	CTK	Inf	Inf	up
KR	Kinetin riboside	CTK	Inf	Inf	up
BAP7G	N6-Benzyladenine-7-glucoside	CTK	0	-Inf	down
tZ	trans-Zeatin	CTK	0.01882144393321255	-5.731478877575656	down
cZ9G	cis-Zeatin-9-glucoside	CTK	0	-Inf	down
DHZ7G	Dihydrozeatin-7-glucoside	CTK	2.387761627192012	1.255658817995803	up
BAP	6-Benzyladenine	CTK	0.44188433899851715	-1.1782592940245153	down
2MeScZR	2-Methylthio-cis-zeatin riboside	CTK	0	-Inf	down
GA20	Gibberellin A20	GA	Inf	Inf	up
GA7	Gibberellin A7	GA	Inf	Inf	up
GA3	Gibberellin A3	GA	Inf	Inf	up
H2JA	Dihydrojasmonic acid	JA	6.85561445673604	2.777285978033414	up
OPC-6	3-oxo-2-(2-(Z)-Pentenyl)cyclopentane-1-hexanoic acid	JA	6.36057132970677	2.6691563594584964	up
OPDA	cis(+)-12-Oxophytodienoic acid	JA	2.1781048319410266	1.1230733924762122	up
OPC-4	3-oxo-2-(2-(Z)-Pentenyl) cyclopentane-1-butyric acid	JA	0	-Inf	down
JA-ILE	Jasmonoyl-L-isoleucine	JA	3.523391249518338	1.8169646855621562	up
JA-Phe	N-[(-)-Jasmonoyl]-(l)-phenalanine	JA	7.527714275006558	2.9122118695842394	up
ST	（±）Strigol	SL	Inf	Inf	up
