# Supplementary material for: An integrated targeted metabolome of phytohormones and transcriptomics analysis provides insight into the new generation of crops: Polygonatum kingianum var. grandifolium and Polygonatum kingianum
Source: Front Plant Sci. 2024 Sep 24;15:1464731. doi: 10.3389/fpls.2024.1464731 (PMC11458434; doi:10.3389/fpls.2024.1464731)
Supplement: Supplementary file 6 [file Table4.xlsx]

## Sheet: All.sample.summary
Sample	Raw Reads	Clean Reads	Clean Base(G)	Error Rate(%)	Q20(%)	Q30(%)	GC Content(%)
D-bud1	44568718	43687538	6.55	0.03	97.18	92.31	47.7
D-bud2	50502490	49612720	7.44	0.03	97.34	92.67	48.13
D-bud3	43211544	42434614	6.37	0.03	97.27	92.51	47.92
D-rhizome1	46219024	45338764	6.8	0.03	97.37	92.7	46.59
D-rhizome2	47870322	46448734	6.97	0.03	97.19	92.25	45.88
D-rhizome3	49256198	48133844	7.22	0.03	97.57	93.14	46.26
D-root1	45415994	44613542	6.69	0.03	97.34	92.64	47.14
D-root2	48598370	47577808	7.14	0.03	97.41	92.78	46.86
D-root3	48174120	47313762	7.1	0.03	97.29	92.53	46.81
X-bud1	44343130	43189132	6.48	0.03	97.35	92.69	48.02
X-bud2	45622236	44932050	6.74	0.03	97.32	92.64	47.88
X-bud3	41070590	39793662	5.97	0.03	97.64	93.28	45.77
X-rhizome1	48685408	48055008	7.21	0.03	97.5	92.99	46.85
X-rhizome2	46466248	43764730	6.56	0.03	97.31	92.53	47.25
X-rhizome3	42685600	41715514	6.26	0.03	97.34	92.56	45.45
X-root1	42147052	40830858	6.12	0.03	97.33	92.68	47.28
X-root2	39821712	38957180	5.84	0.03	97.24	92.46	47.16
X-root3	43955644	43128502	6.47	0.03	96.48	90.69	47.07

## Sheet: Assembly.statistics
Type	Number	Mean Length	N50	N90	Total Bases
Transcript	535362	773	1159	326	413790259
Unigene	298251	1010	1364	474	301283886

## Sheet: BUSCO results
C:98.1%[S:7.5%,D:90.6%],F:1.6%,M:0.3%,n:255
250	Complete BUSCOs (C)
19	Complete and single-copy BUSCOs (S)
231	Complete and duplicated BUSCOs (D)
4	Fragmented BUSCOs (F)
1	Missing BUSCOs (M)
255	Total BUSCO groups searched
Dependencies and versions:
hmmsearch: 3.1
metaeuk: 6.a5d39d9
busco: 5.4.3
