# Supplementary material for: An integrated targeted metabolome of phytohormones and transcriptomics analysis provides insight into the new generation of crops: Polygonatum kingianum var. grandifolium and Polygonatum kingianum
Source: Front Plant Sci. 2024 Sep 24;15:1464731. doi: 10.3389/fpls.2024.1464731 (PMC11458434; doi:10.3389/fpls.2024.1464731)
Supplement: Supplementary file 7 [file Table5.xlsx]

## Sheet: All unigenes
Supplementary Table S5 Annotation of unigenes
ID	Length	KEGG	KEGG pathway	NR	Swissprot	TrEMBL	KOG	GO	Pfam	TF-Family	TF-Category	TF-Classification
Cluster-0.0	778	--	--	Protein TAR1 [Pisum sativum]	--	A0A4D6NR31_VIGUN SubName: Full=Uncharacterized protein {ECO:0000313|EMBL:QCE14247.1};	--	--	--	--	--	--
Cluster-1.0	460	--	--	hypothetical protein CQW23_34916 [Capsicum baccatum]	--	A0A2G2UXP9_CAPBA SubName: Full=Uncharacterized protein {ECO:0000313|EMBL:PHT25457.1};	--	--	--	--	--	--
Cluster-10.0	406	K01968 3-methylcrotonyl-CoA carboxylase alpha subunit [EC:6.4.1.4] | (RefSeq) LOW QUALITY PROTEIN: methylcrotonoyl-CoA carboxylase subunit alpha, mitochondrial-like (A)	ko00280: Valine, leucine and isoleucine degradation; ko01100: Metabolic pathways	serine/threonine-protein kinase STY8-like isoform X2 [Spinacia oleracea]	STY17_ARATH RecName: Full=Serine/threonine-protein kinase STY17 {ECO:0000305}; EC=2.7.11.1 {ECO:0000269|PubMed:17090544}; AltName: Full=Serine/threonine/tyrosine-protein kinase 17 {ECO:0000303|PubMed:16429265};	A0A1D1Y0J5_9ARAE SubName: Full=Mitogen-activated protein kinase kinase kinase 9 {ECO:0000313|EMBL:JAT48131.1}; Flags: Fragment;	Tyrosine kinase specific for activated (GTP-bound) p21cdc42Hs	GO:0005829,cytosol; GO:0005524,ATP binding; GO:0106310,protein serine kinase activity; GO:0004674,protein serine/threonine kinase activity; GO:0004712,protein serine/threonine/tyrosine kinase activity; GO:0009658,chloroplast organization; GO:0006468,protein phosphorylation; GO:0000166,nucleotide binding; GO:0003674,molecular_function; GO:0005488,binding; GO:0017076,purine nucleotide binding; GO:0…	Protein tyrosine and serine/threonine kinase	--	--	--
Cluster-100.0	387	--	--	--	--	--	--	--	--	--	--	--
Cluster-1000.0	451	--	--	--	--	--	--	--	--	--	--	--
Cluster-10000.0	547	--	--	--	--	--	--	--	--	--	--	--
Cluster-100000.0	513	--	--	--	--	--	--	--	--	--	--	--
Cluster-100001.0	1459	--	--	--	--	--	--	--	--	--	--	--
Cluster-100002.0	913	--	--	--	--	--	--	--	--	--	--	--
Cluster-100003.0	795	K04079 molecular chaperone HtpG | (RefSeq) heat shock cognate protein HSP 90-beta-like (A)	ko04141: Protein processing in endoplasmic reticulum; ko04626: Plant-pathogen interaction	Retrovirus-related Pol polyprotein from transposon TNT 1-94 [Vitis vinifera]	POLX_TOBAC RecName: Full=Retrovirus-related Pol polyprotein from transposon TNT 1-94; Includes: RecName: Full=Protease; EC=3.4.23.-; Includes: RecName: Full=Reverse transcriptase; EC=2.7.7.49; Includes: RecName: Full=Endonuclease;	A0A438FMG0_VITVI SubName: Full=Retrovirus-related Pol polyprotein from transposon TNT 1-94 {ECO:0000313|EMBL:RVW61173.1};	FOG: Transposon-encoded proteins with TYA, reverse transcriptase, integrase domains in various combinations	GO:0004190,aspartic-type endopeptidase activity; GO:0004519,endonuclease activity; GO:0003676,nucleic acid binding; GO:0003964,RNA-directed DNA polymerase activity; GO:0008270,zinc ion binding; GO:0015074,DNA integration; GO:0006508,proteolysis; GO:0003674,molecular_function; GO:0003824,catalytic activity; GO:0004175,endopeptidase activity; GO:0008233,peptidase activity; GO:0016787,hydrolase acti…	--	--	--	--
Cluster-100004.0	1843	--	--	--	--	--	--	--	--	--	--	--
Cluster-100005.0	530	--	--	--	--	--	--	--	--	--	--	--
Cluster-100006.0	368	K19001 ATP-dependent DNA helicase | (RefSeq) ATP-dependent DNA helicase DDM1 isoform X1 (A)	--	ATP-dependent DNA helicase DDM1 isoform X2 [Asparagus officinalis]	DDM1_ARATH RecName: Full=ATP-dependent DNA helicase DDM1; EC=3.6.4.12; AltName: Full=Protein CHROMATIN REMODELING 1 {ECO:0000303|PubMed:16547115}; Short=AtCHR1; Short=CHR01; AltName: Full=Protein DECREASED DNA METHYLATION 1; Short=AtDDM1; AltName: Full=Protein SOMNIFEROUS 1; AltName: Full=SWI/SNF2-related matrix-associated actin-dependent regulator of chromatin DDM1;	A0A5P1E400_ASPOF SubName: Full=Uncharacterized protein {ECO:0000313|EMBL:ONK55756.1};	Chromatin remodeling complex WSTF-ISWI, small subunit	GO:0000786,nucleosome; GO:0005634,nucleus; GO:0005524,ATP binding; GO:0016887,ATPase activity; GO:0008094,DNA-dependent ATPase activity; GO:0140658,NA; GO:0003677,DNA binding; GO:0003678,DNA helicase activity; GO:0006346,DNA methylation-dependent heterochromatin assembly; GO:0009294,DNA mediated transformation; GO:0090241,negative regulation of histone H4 acetylation; GO:0051574,positive regulati…	--	--	--	--
Cluster-100006.1	535	K00695 sucrose synthase [EC:2.4.1.13] | (RefSeq) sucrose synthase 2 isoform X1 (A)	ko00500: Starch and sucrose metabolism; ko01100: Metabolic pathways; ko01110: Biosynthesis of secondary metabolites	sucrose synthase1, partial [Elaeis guineensis]	SUS2_TULGE RecName: Full=Sucrose synthase 2; EC=2.4.1.13; AltName: Full=Sucrose-UDP glucosyltransferase 2;	A0A1D1XKR8_9ARAE RecName: Full=Sucrose synthase {ECO:0000256|ARBA:ARBA00012540}; EC=2.4.1.13 {ECO:0000256|ARBA:ARBA00012540}; Flags: Fragment;	Glycosyltransferase	GO:0016157,sucrose synthase activity; GO:0005985,sucrose metabolic process; GO:0003674,molecular_function; GO:0003824,catalytic activity; GO:0008194,UDP-glycosyltransferase activity; GO:0016740,transferase activity; GO:0016757,transferase activity, transferring glycosyl groups; GO:0016758,transferase activity, transferring hexosyl groups; GO:0035251,UDP-glucosyltransferase activity; GO:0046527,gl…	--	--	--	--
Cluster-100006.10	715	K00695 sucrose synthase [EC:2.4.1.13] | (RefSeq) sucrose synthase 2 (A)	ko00500: Starch and sucrose metabolism; ko01100: Metabolic pathways; ko01110: Biosynthesis of secondary metabolites	sucrose synthase 1-like [Phalaenopsis equestris]	SUS1_TULGE RecName: Full=Sucrose synthase 1; EC=2.4.1.13; AltName: Full=Sucrose-UDP glucosyltransferase 1;	A0A6V7PN90_ANACO RecName: Full=Sucrose synthase {ECO:0000256|ARBA:ARBA00012540}; EC=2.4.1.13 {ECO:0000256|ARBA:ARBA00012540};	Glycosyltransferase	GO:0016157,sucrose synthase activity; GO:0005985,sucrose metabolic process; GO:0003674,molecular_function; GO:0003824,catalytic activity; GO:0008194,UDP-glycosyltransferase activity; GO:0016740,transferase activity; GO:0016757,transferase activity, transferring glycosyl groups; GO:0016758,transferase activity, transferring hexosyl groups; GO:0035251,UDP-glucosyltransferase activity; GO:0046527,gl…	--	--	--	--
Cluster-100006.11	922	K00695 sucrose synthase [EC:2.4.1.13] | (RefSeq) sucrose synthase 2 (A)	ko00500: Starch and sucrose metabolism; ko01100: Metabolic pathways; ko01110: Biosynthesis of secondary metabolites	sucrose synthase1, partial [Elaeis guineensis]	SUS1_TULGE RecName: Full=Sucrose synthase 1; EC=2.4.1.13; AltName: Full=Sucrose-UDP glucosyltransferase 1;	G8FGK7_ELAGV RecName: Full=Sucrose synthase {ECO:0000256|ARBA:ARBA00012540}; EC=2.4.1.13 {ECO:0000256|ARBA:ARBA00012540}; Flags: Fragment;	Glycosyltransferase	GO:0016157,sucrose synthase activity; GO:0005985,sucrose metabolic process; GO:0003674,molecular_function; GO:0003824,catalytic activity; GO:0008194,UDP-glycosyltransferase activity; GO:0016740,transferase activity; GO:0016757,transferase activity, transferring glycosyl groups; GO:0016758,transferase activity, transferring hexosyl groups; GO:0035251,UDP-glucosyltransferase activity; GO:0046527,gl…	Glycosyl transferases group 1	--	--	--
Cluster-100006.12	879	K00695 sucrose synthase [EC:2.4.1.13] | (RefSeq) sucrose synthase 1 (A)	ko00500: Starch and sucrose metabolism; ko01100: Metabolic pathways; ko01110: Biosynthesis of secondary metabolites	sucrose synthase1, partial [Elaeis guineensis]	SUS1_TULGE RecName: Full=Sucrose synthase 1; EC=2.4.1.13; AltName: Full=Sucrose-UDP glucosyltransferase 1;	G8FGK7_ELAGV RecName: Full=Sucrose synthase {ECO:0000256|ARBA:ARBA00012540}; EC=2.4.1.13 {ECO:0000256|ARBA:ARBA00012540}; Flags: Fragment;	Glycosyltransferase	GO:0016157,sucrose synthase activity; GO:0005985,sucrose metabolic process; GO:0003674,molecular_function; GO:0003824,catalytic activity; GO:0008194,UDP-glycosyltransferase activity; GO:0016740,transferase activity; GO:0016757,transferase activity, transferring glycosyl groups; GO:0016758,transferase activity, transferring hexosyl groups; GO:0035251,UDP-glucosyltransferase activity; GO:0046527,gl…	Glycosyl transferases group 1	--	--	--
Cluster-100006.13	976	K00695 sucrose synthase [EC:2.4.1.13] | (RefSeq) sucrose synthase 2 (A)	ko00500: Starch and sucrose metabolism; ko01100: Metabolic pathways; ko01110: Biosynthesis of secondary metabolites	sucrose synthase1, partial [Elaeis guineensis]	SUS1_TULGE RecName: Full=Sucrose synthase 1; EC=2.4.1.13; AltName: Full=Sucrose-UDP glucosyltransferase 1;	G8FGK7_ELAGV RecName: Full=Sucrose synthase {ECO:0000256|ARBA:ARBA00012540}; EC=2.4.1.13 {ECO:0000256|ARBA:ARBA00012540}; Flags: Fragment;	Glycosyltransferase	GO:0016157,sucrose synthase activity; GO:0005985,sucrose metabolic process; GO:0003674,molecular_function; GO:0003824,catalytic activity; GO:0008194,UDP-glycosyltransferase activity; GO:0016740,transferase activity; GO:0016757,transferase activity, transferring glycosyl groups; GO:0016758,transferase activity, transferring hexosyl groups; GO:0035251,UDP-glucosyltransferase activity; GO:0046527,gl…	Glycosyl transferases group 1	--	--	--
Cluster-100006.14	296	K00695 sucrose synthase [EC:2.4.1.13] | (RefSeq) sucrose synthase 2 isoform X1 (A)	ko00500: Starch and sucrose metabolism; ko01100: Metabolic pathways; ko01110: Biosynthesis of secondary metabolites	unnamed protein product [Ananas comosus var. bracteatus]	SUS2_TULGE RecName: Full=Sucrose synthase 2; EC=2.4.1.13; AltName: Full=Sucrose-UDP glucosyltransferase 2;	A0A6V7PN90_ANACO RecName: Full=Sucrose synthase {ECO:0000256|ARBA:ARBA00012540}; EC=2.4.1.13 {ECO:0000256|ARBA:ARBA00012540};	Glycosyltransferase	GO:0016157,sucrose synthase activity; GO:0005985,sucrose metabolic process; GO:0003674,molecular_function; GO:0003824,catalytic activity; GO:0008194,UDP-glycosyltransferase activity; GO:0016740,transferase activity; GO:0016757,transferase activity, transferring glycosyl groups; GO:0016758,transferase activity, transferring hexosyl groups; GO:0035251,UDP-glucosyltransferase activity; GO:0046527,gl…	--	--	--	--
Cluster-100006.15	849	K00695 sucrose synthase [EC:2.4.1.13] | (RefSeq) sucrose synthase 2 (A)	ko00500: Starch and sucrose metabolism; ko01100: Metabolic pathways; ko01110: Biosynthesis of secondary metabolites	sucrose synthase1, partial [Elaeis guineensis]	SUS2_TULGE RecName: Full=Sucrose synthase 2; EC=2.4.1.13; AltName: Full=Sucrose-UDP glucosyltransferase 2;	G8FGK7_ELAGV RecName: Full=Sucrose synthase {ECO:0000256|ARBA:ARBA00012540}; EC=2.4.1.13 {ECO:0000256|ARBA:ARBA00012540}; Flags: Fragment;	Glycosyltransferase	GO:0016157,sucrose synthase activity; GO:0005985,sucrose metabolic process; GO:0003674,molecular_function; GO:0003824,catalytic activity; GO:0008194,UDP-glycosyltransferase activity; GO:0016740,transferase activity; GO:0016757,transferase activity, transferring glycosyl groups; GO:0016758,transferase activity, transferring hexosyl groups; GO:0035251,UDP-glucosyltransferase activity; GO:0046527,gl…	Glycosyl transferases group 1	--	--	--
Cluster-100006.16	287	K00695 sucrose synthase [EC:2.4.1.13] | (RefSeq) sucrose synthase 2 (A)	ko00500: Starch and sucrose metabolism; ko01100: Metabolic pathways; ko01110: Biosynthesis of secondary metabolites	sucrose synthase 1-like [Phalaenopsis equestris]	SUS1_TULGE RecName: Full=Sucrose synthase 1; EC=2.4.1.13; AltName: Full=Sucrose-UDP glucosyltransferase 1;	A0A835URF6_VANPL RecName: Full=Sucrose synthase {ECO:0000256|ARBA:ARBA00012540}; EC=2.4.1.13 {ECO:0000256|ARBA:ARBA00012540};	Glycosyltransferase	GO:0016157,sucrose synthase activity; GO:0005985,sucrose metabolic process; GO:0003674,molecular_function; GO:0003824,catalytic activity; GO:0008194,UDP-glycosyltransferase activity; GO:0016740,transferase activity; GO:0016757,transferase activity, transferring glycosyl groups; GO:0016758,transferase activity, transferring hexosyl groups; GO:0035251,UDP-glucosyltransferase activity; GO:0046527,gl…	--	--	--	--
Cluster-100006.17	960	K00695 sucrose synthase [EC:2.4.1.13] | (RefSeq) sucrose synthase 2-like (A)	ko00500: Starch and sucrose metabolism; ko01100: Metabolic pathways; ko01110: Biosynthesis of secondary metabolites	unnamed protein product [Triticum turgidum subsp. durum]	SUS1_TULGE RecName: Full=Sucrose synthase 1; EC=2.4.1.13; AltName: Full=Sucrose-UDP glucosyltransferase 1;	A0A446Y5L8_TRITD RecName: Full=Sucrose synthase {ECO:0000256|ARBA:ARBA00012540, ECO:0000256|RuleBase:RU280817}; EC=2.4.1.13 {ECO:0000256|ARBA:ARBA00012540, ECO:0000256|RuleBase:RU280817};	Glycosyltransferase	GO:0016157,sucrose synthase activity; GO:0005985,sucrose metabolic process; GO:0003674,molecular_function; GO:0003824,catalytic activity; GO:0008194,UDP-glycosyltransferase activity; GO:0016740,transferase activity; GO:0016757,transferase activity, transferring glycosyl groups; GO:0016758,transferase activity, transferring hexosyl groups; GO:0035251,UDP-glucosyltransferase activity; GO:0046527,gl…	Glycosyl transferases group 1	--	--	--
Cluster-100006.18	931	K00695 sucrose synthase [EC:2.4.1.13] | (RefSeq) sucrose synthase 2 (A)	ko00500: Starch and sucrose metabolism; ko01100: Metabolic pathways; ko01110: Biosynthesis of secondary metabolites	unnamed protein product [Triticum turgidum subsp. durum]	SUS1_TULGE RecName: Full=Sucrose synthase 1; EC=2.4.1.13; AltName: Full=Sucrose-UDP glucosyltransferase 1;	A0A446Y5L8_TRITD RecName: Full=Sucrose synthase {ECO:0000256|ARBA:ARBA00012540, ECO:0000256|RuleBase:RU280817}; EC=2.4.1.13 {ECO:0000256|ARBA:ARBA00012540, ECO:0000256|RuleBase:RU280817};	Glycosyltransferase	GO:0016157,sucrose synthase activity; GO:0005985,sucrose metabolic process; GO:0003674,molecular_function; GO:0003824,catalytic activity; GO:0008194,UDP-glycosyltransferase activity; GO:0016740,transferase activity; GO:0016757,transferase activity, transferring glycosyl groups; GO:0016758,transferase activity, transferring hexosyl groups; GO:0035251,UDP-glucosyltransferase activity; GO:0046527,gl…	Glycosyl transferases group 1	--	--	--
Cluster-100006.19	440	K00695 sucrose synthase [EC:2.4.1.13] | (RefSeq) sucrose synthase 2-like (A)	ko00500: Starch and sucrose metabolism; ko01100: Metabolic pathways; ko01110: Biosynthesis of secondary metabolites	uncharacterized protein A4U43_C07F36670 [Asparagus officinalis]	SUS_SOYBN RecName: Full=Sucrose synthase; EC=2.4.1.13; AltName: Full=Nodulin-100; Short=N-100; AltName: Full=Sucrose-UDP glucosyltransferase;	A0A5P1EHM8_ASPOF RecName: Full=Sucrose synthase {ECO:0000256|ARBA:ARBA00012540, ECO:0000256|RuleBase:RU280817}; EC=2.4.1.13 {ECO:0000256|ARBA:ARBA00012540, ECO:0000256|RuleBase:RU280817};	Glycosyltransferase	GO:0016157,sucrose synthase activity; GO:0009877,nodulation; GO:0005985,sucrose metabolic process; GO:0003674,molecular_function; GO:0003824,catalytic activity; GO:0008194,UDP-glycosyltransferase activity; GO:0016740,transferase activity; GO:0016757,transferase activity, transferring glycosyl groups; GO:0016758,transferase activity, transferring hexosyl groups; GO:0035251,UDP-glucosyltransferase …	--	--	--	--
Cluster-100006.2	452	K00695 sucrose synthase [EC:2.4.1.13] | (RefSeq) sucrose synthase 2 (A)	ko00500: Starch and sucrose metabolism; ko01100: Metabolic pathways; ko01110: Biosynthesis of secondary metabolites	hypothetical protein B296_00033402 [Ensete ventricosum]	SUS1_TULGE RecName: Full=Sucrose synthase 1; EC=2.4.1.13; AltName: Full=Sucrose-UDP glucosyltransferase 1;	A0A426YFK2_ENSVE RecName: Full=Sucrose synthase {ECO:0000256|ARBA:ARBA00012540}; EC=2.4.1.13 {ECO:0000256|ARBA:ARBA00012540};	Glycosyltransferase	GO:0016157,sucrose synthase activity; GO:0005985,sucrose metabolic process; GO:0003674,molecular_function; GO:0003824,catalytic activity; GO:0008194,UDP-glycosyltransferase activity; GO:0016740,transferase activity; GO:0016757,transferase activity, transferring glycosyl groups; GO:0016758,transferase activity, transferring hexosyl groups; GO:0035251,UDP-glucosyltransferase activity; GO:0046527,gl…	--	--	--	--
Cluster-100006.20	443	K00695 sucrose synthase [EC:2.4.1.13] | (RefSeq) sucrose synthase 2-like (A)	ko00500: Starch and sucrose metabolism; ko01100: Metabolic pathways; ko01110: Biosynthesis of secondary metabolites	unnamed protein product [Ananas comosus var. bracteatus]	SUS2_TULGE RecName: Full=Sucrose synthase 2; EC=2.4.1.13; AltName: Full=Sucrose-UDP glucosyltransferase 2;	A0A1D1XKR8_9ARAE RecName: Full=Sucrose synthase {ECO:0000256|ARBA:ARBA00012540}; EC=2.4.1.13 {ECO:0000256|ARBA:ARBA00012540}; Flags: Fragment;	Glycosyltransferase	GO:0016157,sucrose synthase activity; GO:0005985,sucrose metabolic process; GO:0003674,molecular_function; GO:0003824,catalytic activity; GO:0008194,UDP-glycosyltransferase activity; GO:0016740,transferase activity; GO:0016757,transferase activity, transferring glycosyl groups; GO:0016758,transferase activity, transferring hexosyl groups; GO:0035251,UDP-glucosyltransferase activity; GO:0046527,gl…	--	--	--	--
Cluster-100006.21	246	K00695 sucrose synthase [EC:2.4.1.13] | (RefSeq) sucrose synthase 2 isoform X1 (A)	ko00500: Starch and sucrose metabolism; ko01100: Metabolic pathways; ko01110: Biosynthesis of secondary metabolites	sucrose synthase, partial [Campsiandra comosa]	SUS2_TULGE RecName: Full=Sucrose synthase 2; EC=2.4.1.13; AltName: Full=Sucrose-UDP glucosyltransferase 2;	K7WB47_9FABA RecName: Full=Sucrose synthase {ECO:0000256|ARBA:ARBA00012540}; EC=2.4.1.13 {ECO:0000256|ARBA:ARBA00012540}; Flags: Fragment;	Glycosyltransferase	GO:0016157,sucrose synthase activity; GO:0005985,sucrose metabolic process; GO:0003674,molecular_function; GO:0003824,catalytic activity; GO:0008194,UDP-glycosyltransferase activity; GO:0016740,transferase activity; GO:0016757,transferase activity, transferring glycosyl groups; GO:0016758,transferase activity, transferring hexosyl groups; GO:0035251,UDP-glucosyltransferase activity; GO:0046527,gl…	--	--	--	--
Cluster-100006.22	513	K00695 sucrose synthase [EC:2.4.1.13] | (RefSeq) sucrose synthase 2-like (A)	ko00500: Starch and sucrose metabolism; ko01100: Metabolic pathways; ko01110: Biosynthesis of secondary metabolites	sucrose synthase 2-like [Asparagus officinalis]	SUS2_TULGE RecName: Full=Sucrose synthase 2; EC=2.4.1.13; AltName: Full=Sucrose-UDP glucosyltransferase 2;	A0A140GPJ2_ALBBR RecName: Full=Sucrose synthase {ECO:0000256|ARBA:ARBA00012540, ECO:0000256|RuleBase:RU280817}; EC=2.4.1.13 {ECO:0000256|ARBA:ARBA00012540, ECO:0000256|RuleBase:RU280817};	Glycosyltransferase	GO:0016157,sucrose synthase activity; GO:0005985,sucrose metabolic process; GO:0003674,molecular_function; GO:0003824,catalytic activity; GO:0008194,UDP-glycosyltransferase activity; GO:0016740,transferase activity; GO:0016757,transferase activity, transferring glycosyl groups; GO:0016758,transferase activity, transferring hexosyl groups; GO:0035251,UDP-glucosyltransferase activity; GO:0046527,gl…	Sucrose synthase	--	--	--
Cluster-100006.23	369	--	--	--	--	--	--	--	--	--	--	--
Cluster-100006.24	290	K00695 sucrose synthase [EC:2.4.1.13] | (RefSeq) sucrose synthase 2-like (A)	ko00500: Starch and sucrose metabolism; ko01100: Metabolic pathways; ko01110: Biosynthesis of secondary metabolites	uncharacterized protein A4U43_C07F36670 [Asparagus officinalis]	SUS1_TULGE RecName: Full=Sucrose synthase 1; EC=2.4.1.13; AltName: Full=Sucrose-UDP glucosyltransferase 1;	A0A5P1EHM8_ASPOF RecName: Full=Sucrose synthase {ECO:0000256|ARBA:ARBA00012540, ECO:0000256|RuleBase:RU280817}; EC=2.4.1.13 {ECO:0000256|ARBA:ARBA00012540, ECO:0000256|RuleBase:RU280817};	Glycosyltransferase	GO:0016157,sucrose synthase activity; GO:0005985,sucrose metabolic process; GO:0003674,molecular_function; GO:0003824,catalytic activity; GO:0008194,UDP-glycosyltransferase activity; GO:0016740,transferase activity; GO:0016757,transferase activity, transferring glycosyl groups; GO:0016758,transferase activity, transferring hexosyl groups; GO:0035251,UDP-glucosyltransferase activity; GO:0046527,gl…	--	--	--	--
Cluster-100006.25	2234	K00695 sucrose synthase [EC:2.4.1.13] | (RefSeq) sucrose synthase 2-like (A)	ko00500: Starch and sucrose metabolism; ko01100: Metabolic pathways; ko01110: Biosynthesis of secondary metabolites	sucrose synthase 2-like [Asparagus officinalis]	SUS1_TULGE RecName: Full=Sucrose synthase 1; EC=2.4.1.13; AltName: Full=Sucrose-UDP glucosyltransferase 1;	A0A5P1F9V3_ASPOF RecName: Full=Sucrose synthase {ECO:0000256|ARBA:ARBA00012540, ECO:0000256|RuleBase:RU280817}; EC=2.4.1.13 {ECO:0000256|ARBA:ARBA00012540, ECO:0000256|RuleBase:RU280817};	Glycosyltransferase	GO:0016157,sucrose synthase activity; GO:0005985,sucrose metabolic process; GO:0003674,molecular_function; GO:0003824,catalytic activity; GO:0008194,UDP-glycosyltransferase activity; GO:0016740,transferase activity; GO:0016757,transferase activity, transferring glycosyl groups; GO:0016758,transferase activity, transferring hexosyl groups; GO:0035251,UDP-glucosyltransferase activity; GO:0046527,gl…	Glycosyl transferases group 1	--	--	--
Cluster-100006.26	3239	K00695 sucrose synthase [EC:2.4.1.13] | (RefSeq) sucrose synthase 2 (A)	ko00500: Starch and sucrose metabolism; ko01100: Metabolic pathways; ko01110: Biosynthesis of secondary metabolites	sucrose synthase [Albuca bracteata]	SUS2_TULGE RecName: Full=Sucrose synthase 2; EC=2.4.1.13; AltName: Full=Sucrose-UDP glucosyltransferase 2;	A0A140GPJ2_ALBBR RecName: Full=Sucrose synthase {ECO:0000256|ARBA:ARBA00012540, ECO:0000256|RuleBase:RU280817}; EC=2.4.1.13 {ECO:0000256|ARBA:ARBA00012540, ECO:0000256|RuleBase:RU280817};	Glycosyltransferase	GO:0016157,sucrose synthase activity; GO:0005985,sucrose metabolic process; GO:0003674,molecular_function; GO:0003824,catalytic activity; GO:0008194,UDP-glycosyltransferase activity; GO:0016740,transferase activity; GO:0016757,transferase activity, transferring glycosyl groups; GO:0016758,transferase activity, transferring hexosyl groups; GO:0035251,UDP-glucosyltransferase activity; GO:0046527,gl…	Sucrose synthase	--	--	--
Cluster-100006.27	1567	K00695 sucrose synthase [EC:2.4.1.13] | (RefSeq) sucrose synthase 2-like (A)	ko00500: Starch and sucrose metabolism; ko01100: Metabolic pathways; ko01110: Biosynthesis of secondary metabolites	sucrose synthase 2-like [Asparagus officinalis]	SUS2_TULGE RecName: Full=Sucrose synthase 2; EC=2.4.1.13; AltName: Full=Sucrose-UDP glucosyltransferase 2;	A0A5P1F9V3_ASPOF RecName: Full=Sucrose synthase {ECO:0000256|ARBA:ARBA00012540, ECO:0000256|RuleBase:RU280817}; EC=2.4.1.13 {ECO:0000256|ARBA:ARBA00012540, ECO:0000256|RuleBase:RU280817};	Glycosyltransferase	GO:0016157,sucrose synthase activity; GO:0005985,sucrose metabolic process; GO:0003674,molecular_function; GO:0003824,catalytic activity; GO:0008194,UDP-glycosyltransferase activity; GO:0016740,transferase activity; GO:0016757,transferase activity, transferring glycosyl groups; GO:0016758,transferase activity, transferring hexosyl groups; GO:0035251,UDP-glucosyltransferase activity; GO:0046527,gl…	Sucrose synthase	--	--	--
Cluster-100006.28	2140	K00695 sucrose synthase [EC:2.4.1.13] | (RefSeq) sucrose synthase 2 (A)	ko00500: Starch and sucrose metabolism; ko01100: Metabolic pathways; ko01110: Biosynthesis of secondary metabolites	sucrose synthase [Albuca bracteata]	SUS2_TULGE RecName: Full=Sucrose synthase 2; EC=2.4.1.13; AltName: Full=Sucrose-UDP glucosyltransferase 2;	A0A140GPJ2_ALBBR RecName: Full=Sucrose synthase {ECO:0000256|ARBA:ARBA00012540, ECO:0000256|RuleBase:RU280817}; EC=2.4.1.13 {ECO:0000256|ARBA:ARBA00012540, ECO:0000256|RuleBase:RU280817};	Glycosyltransferase	GO:0016157,sucrose synthase activity; GO:0005985,sucrose metabolic process; GO:0003674,molecular_function; GO:0003824,catalytic activity; GO:0008194,UDP-glycosyltransferase activity; GO:0016740,transferase activity; GO:0016757,transferase activity, transferring glycosyl groups; GO:0016758,transferase activity, transferring hexosyl groups; GO:0035251,UDP-glucosyltransferase activity; GO:0046527,gl…	Sucrose synthase	--	--	--
Cluster-100006.29	782	K00695 sucrose synthase [EC:2.4.1.13] | (RefSeq) sucrose synthase 2-like (A)	ko00500: Starch and sucrose metabolism; ko01100: Metabolic pathways; ko01110: Biosynthesis of secondary metabolites	sucrose synthase [Albuca bracteata]	SUS1_TULGE RecName: Full=Sucrose synthase 1; EC=2.4.1.13; AltName: Full=Sucrose-UDP glucosyltransferase 1;	A0A140GPJ2_ALBBR RecName: Full=Sucrose synthase {ECO:0000256|ARBA:ARBA00012540, ECO:0000256|RuleBase:RU280817}; EC=2.4.1.13 {ECO:0000256|ARBA:ARBA00012540, ECO:0000256|RuleBase:RU280817};	Glycosyltransferase	GO:0016157,sucrose synthase activity; GO:0005985,sucrose metabolic process; GO:0003674,molecular_function; GO:0003824,catalytic activity; GO:0008194,UDP-glycosyltransferase activity; GO:0016740,transferase activity; GO:0016757,transferase activity, transferring glycosyl groups; GO:0016758,transferase activity, transferring hexosyl groups; GO:0035251,UDP-glucosyltransferase activity; GO:0046527,gl…	Sucrose synthase	--	--	--
Cluster-100006.3	291	K00695 sucrose synthase [EC:2.4.1.13] | (RefSeq) sucrose synthase 2 (A)	ko00500: Starch and sucrose metabolism; ko01100: Metabolic pathways; ko01110: Biosynthesis of secondary metabolites	hypothetical protein PVAP13_4NG070700 [Panicum virgatum]	SUS1_SOLTU RecName: Full=Sucrose synthase; EC=2.4.1.13; AltName: Full=SS16; AltName: Full=Sucrose-UDP glucosyltransferase;	A0A446S438_TRITD RecName: Full=Sucrose synthase {ECO:0000256|ARBA:ARBA00012540}; EC=2.4.1.13 {ECO:0000256|ARBA:ARBA00012540};	Glycosyltransferase	GO:0016157,sucrose synthase activity; GO:0005985,sucrose metabolic process; GO:0003674,molecular_function; GO:0003824,catalytic activity; GO:0008194,UDP-glycosyltransferase activity; GO:0016740,transferase activity; GO:0016757,transferase activity, transferring glycosyl groups; GO:0016758,transferase activity, transferring hexosyl groups; GO:0035251,UDP-glucosyltransferase activity; GO:0046527,gl…	--	--	--	--
Cluster-100006.30	566	K00695 sucrose synthase [EC:2.4.1.13] | (RefSeq) sucrose synthase 2-like (A)	ko00500: Starch and sucrose metabolism; ko01100: Metabolic pathways; ko01110: Biosynthesis of secondary metabolites	sucrose synthase [Albuca bracteata]	SUS1_MAIZE RecName: Full=Sucrose synthase 1; EC=2.4.1.13; AltName: Full=Shrunken-1; AltName: Full=Sucrose-UDP glucosyltransferase 1;	A0A140GPJ2_ALBBR RecName: Full=Sucrose synthase {ECO:0000256|ARBA:ARBA00012540, ECO:0000256|RuleBase:RU280817}; EC=2.4.1.13 {ECO:0000256|ARBA:ARBA00012540, ECO:0000256|RuleBase:RU280817};	Glycosyltransferase	GO:0016157,sucrose synthase activity; GO:0034059,response to anoxia; GO:0010037,response to carbon dioxide; GO:0005985,sucrose metabolic process; GO:0003674,molecular_function; GO:0003824,catalytic activity; GO:0008194,UDP-glycosyltransferase activity; GO:0016740,transferase activity; GO:0016757,transferase activity, transferring glycosyl groups; GO:0016758,transferase activity, transferring hexo…	Sucrose synthase	--	--	--
Cluster-100006.31	566	K00695 sucrose synthase [EC:2.4.1.13] | (RefSeq) sucrose synthase 2-like (A)	ko00500: Starch and sucrose metabolism; ko01100: Metabolic pathways; ko01110: Biosynthesis of secondary metabolites	sucrose synthase [Albuca bracteata]	SUS1_MAIZE RecName: Full=Sucrose synthase 1; EC=2.4.1.13; AltName: Full=Shrunken-1; AltName: Full=Sucrose-UDP glucosyltransferase 1;	A0A140GPJ2_ALBBR RecName: Full=Sucrose synthase {ECO:0000256|ARBA:ARBA00012540, ECO:0000256|RuleBase:RU280817}; EC=2.4.1.13 {ECO:0000256|ARBA:ARBA00012540, ECO:0000256|RuleBase:RU280817};	Glycosyltransferase	GO:0016157,sucrose synthase activity; GO:0034059,response to anoxia; GO:0010037,response to carbon dioxide; GO:0005985,sucrose metabolic process; GO:0003674,molecular_function; GO:0003824,catalytic activity; GO:0008194,UDP-glycosyltransferase activity; GO:0016740,transferase activity; GO:0016757,transferase activity, transferring glycosyl groups; GO:0016758,transferase activity, transferring hexo…	Sucrose synthase	--	--	--
Cluster-100006.32	2807	K00695 sucrose synthase [EC:2.4.1.13] | (RefSeq) sucrose synthase 2 (A)	ko00500: Starch and sucrose metabolism; ko01100: Metabolic pathways; ko01110: Biosynthesis of secondary metabolites	sucrose synthase [Albuca bracteata]	SUS2_TULGE RecName: Full=Sucrose synthase 2; EC=2.4.1.13; AltName: Full=Sucrose-UDP glucosyltransferase 2;	A0A140GPJ2_ALBBR RecName: Full=Sucrose synthase {ECO:0000256|ARBA:ARBA00012540, ECO:0000256|RuleBase:RU280817}; EC=2.4.1.13 {ECO:0000256|ARBA:ARBA00012540, ECO:0000256|RuleBase:RU280817};	Glycosyltransferase	GO:0016157,sucrose synthase activity; GO:0005985,sucrose metabolic process; GO:0003674,molecular_function; GO:0003824,catalytic activity; GO:0008194,UDP-glycosyltransferase activity; GO:0016740,transferase activity; GO:0016757,transferase activity, transferring glycosyl groups; GO:0016758,transferase activity, transferring hexosyl groups; GO:0035251,UDP-glucosyltransferase activity; GO:0046527,gl…	Sucrose synthase	--	--	--
Cluster-100006.33	1866	K00695 sucrose synthase [EC:2.4.1.13] | (RefSeq) sucrose synthase 2 (A)	ko00500: Starch and sucrose metabolism; ko01100: Metabolic pathways; ko01110: Biosynthesis of secondary metabolites	sucrose synthase [Albuca bracteata]	SUS1_TULGE RecName: Full=Sucrose synthase 1; EC=2.4.1.13; AltName: Full=Sucrose-UDP glucosyltransferase 1;	A0A140GPJ2_ALBBR RecName: Full=Sucrose synthase {ECO:0000256|ARBA:ARBA00012540, ECO:0000256|RuleBase:RU280817}; EC=2.4.1.13 {ECO:0000256|ARBA:ARBA00012540, ECO:0000256|RuleBase:RU280817};	Glycosyltransferase	GO:0016157,sucrose synthase activity; GO:0005985,sucrose metabolic process; GO:0003674,molecular_function; GO:0003824,catalytic activity; GO:0008194,UDP-glycosyltransferase activity; GO:0016740,transferase activity; GO:0016757,transferase activity, transferring glycosyl groups; GO:0016758,transferase activity, transferring hexosyl groups; GO:0035251,UDP-glucosyltransferase activity; GO:0046527,gl…	Sucrose synthase	--	--	--
Cluster-100006.34	2765	K00695 sucrose synthase [EC:2.4.1.13] | (RefSeq) sucrose synthase 2 (A)	ko00500: Starch and sucrose metabolism; ko01100: Metabolic pathways; ko01110: Biosynthesis of secondary metabolites	sucrose synthase [Albuca bracteata]	SUS2_TULGE RecName: Full=Sucrose synthase 2; EC=2.4.1.13; AltName: Full=Sucrose-UDP glucosyltransferase 2;	A0A140GPJ2_ALBBR RecName: Full=Sucrose synthase {ECO:0000256|ARBA:ARBA00012540, ECO:0000256|RuleBase:RU280817}; EC=2.4.1.13 {ECO:0000256|ARBA:ARBA00012540, ECO:0000256|RuleBase:RU280817};	Glycosyltransferase	GO:0016157,sucrose synthase activity; GO:0005985,sucrose metabolic process; GO:0003674,molecular_function; GO:0003824,catalytic activity; GO:0008194,UDP-glycosyltransferase activity; GO:0016740,transferase activity; GO:0016757,transferase activity, transferring glycosyl groups; GO:0016758,transferase activity, transferring hexosyl groups; GO:0035251,UDP-glucosyltransferase activity; GO:0046527,gl…	Sucrose synthase	--	--	--
Cluster-100006.35	2142	K00695 sucrose synthase [EC:2.4.1.13] | (RefSeq) sucrose synthase 2-like (A)	ko00500: Starch and sucrose metabolism; ko01100: Metabolic pathways; ko01110: Biosynthesis of secondary metabolites	sucrose synthase 2-like [Asparagus officinalis]	SUS2_TULGE RecName: Full=Sucrose synthase 2; EC=2.4.1.13; AltName: Full=Sucrose-UDP glucosyltransferase 2;	A0A5P1F9V3_ASPOF RecName: Full=Sucrose synthase {ECO:0000256|ARBA:ARBA00012540, ECO:0000256|RuleBase:RU280817}; EC=2.4.1.13 {ECO:0000256|ARBA:ARBA00012540, ECO:0000256|RuleBase:RU280817};	Glycosyltransferase	GO:0016157,sucrose synthase activity; GO:0005985,sucrose metabolic process; GO:0003674,molecular_function; GO:0003824,catalytic activity; GO:0008194,UDP-glycosyltransferase activity; GO:0016740,transferase activity; GO:0016757,transferase activity, transferring glycosyl groups; GO:0016758,transferase activity, transferring hexosyl groups; GO:0035251,UDP-glucosyltransferase activity; GO:0046527,gl…	Sucrose synthase	--	--	--
Cluster-100006.36	1108	K00695 sucrose synthase [EC:2.4.1.13] | (RefSeq) sucrose synthase 2 (A)	ko00500: Starch and sucrose metabolism; ko01100: Metabolic pathways; ko01110: Biosynthesis of secondary metabolites	sucrose synthase [Albuca bracteata]	SUS1_TULGE RecName: Full=Sucrose synthase 1; EC=2.4.1.13; AltName: Full=Sucrose-UDP glucosyltransferase 1;	A0A140GPJ2_ALBBR RecName: Full=Sucrose synthase {ECO:0000256|ARBA:ARBA00012540, ECO:0000256|RuleBase:RU280817}; EC=2.4.1.13 {ECO:0000256|ARBA:ARBA00012540, ECO:0000256|RuleBase:RU280817};	Glycosyltransferase	GO:0016157,sucrose synthase activity; GO:0005985,sucrose metabolic process; GO:0003674,molecular_function; GO:0003824,catalytic activity; GO:0008194,UDP-glycosyltransferase activity; GO:0016740,transferase activity; GO:0016757,transferase activity, transferring glycosyl groups; GO:0016758,transferase activity, transferring hexosyl groups; GO:0035251,UDP-glucosyltransferase activity; GO:0046527,gl…	Sucrose synthase	--	--	--
Cluster-100006.37	250	K00695 sucrose synthase [EC:2.4.1.13] | (RefSeq) sucrose synthase 2 (A)	ko00500: Starch and sucrose metabolism; ko01100: Metabolic pathways; ko01110: Biosynthesis of secondary metabolites	sucrose synthase [Albuca bracteata]	SUS1_HORVU RecName: Full=Sucrose synthase 1; EC=2.4.1.13; AltName: Full=Sucrose-UDP glucosyltransferase 1;	A0A140GPJ2_ALBBR RecName: Full=Sucrose synthase {ECO:0000256|ARBA:ARBA00012540, ECO:0000256|RuleBase:RU280817}; EC=2.4.1.13 {ECO:0000256|ARBA:ARBA00012540, ECO:0000256|RuleBase:RU280817};	Glycosyltransferase	GO:0016157,sucrose synthase activity; GO:0005985,sucrose metabolic process; GO:0003674,molecular_function; GO:0003824,catalytic activity; GO:0008194,UDP-glycosyltransferase activity; GO:0016740,transferase activity; GO:0016757,transferase activity, transferring glycosyl groups; GO:0016758,transferase activity, transferring hexosyl groups; GO:0035251,UDP-glucosyltransferase activity; GO:0046527,gl…	--	--	--	--
Cluster-100006.38	482	K00695 sucrose synthase [EC:2.4.1.13] | (RefSeq) sucrose synthase 2 (A)	ko00500: Starch and sucrose metabolism; ko01100: Metabolic pathways; ko01110: Biosynthesis of secondary metabolites	sucrose synthase [Albuca bracteata]	SUS1_HORVU RecName: Full=Sucrose synthase 1; EC=2.4.1.13; AltName: Full=Sucrose-UDP glucosyltransferase 1;	A0A140GPJ2_ALBBR RecName: Full=Sucrose synthase {ECO:0000256|ARBA:ARBA00012540, ECO:0000256|RuleBase:RU280817}; EC=2.4.1.13 {ECO:0000256|ARBA:ARBA00012540, ECO:0000256|RuleBase:RU280817};	Glycosyltransferase	GO:0016157,sucrose synthase activity; GO:0005985,sucrose metabolic process; GO:0003674,molecular_function; GO:0003824,catalytic activity; GO:0008194,UDP-glycosyltransferase activity; GO:0016740,transferase activity; GO:0016757,transferase activity, transferring glycosyl groups; GO:0016758,transferase activity, transferring hexosyl groups; GO:0035251,UDP-glucosyltransferase activity; GO:0046527,gl…	Sucrose synthase	--	--	--
Cluster-100006.39	2942	K00695 sucrose synthase [EC:2.4.1.13] | (RefSeq) sucrose synthase 2 (A)	ko00500: Starch and sucrose metabolism; ko01100: Metabolic pathways; ko01110: Biosynthesis of secondary metabolites	sucrose synthase [Albuca bracteata]	SUS2_TULGE RecName: Full=Sucrose synthase 2; EC=2.4.1.13; AltName: Full=Sucrose-UDP glucosyltransferase 2;	A0A140GPJ2_ALBBR RecName: Full=Sucrose synthase {ECO:0000256|ARBA:ARBA00012540, ECO:0000256|RuleBase:RU280817}; EC=2.4.1.13 {ECO:0000256|ARBA:ARBA00012540, ECO:0000256|RuleBase:RU280817};	Glycosyltransferase	GO:0016157,sucrose synthase activity; GO:0005985,sucrose metabolic process; GO:0003674,molecular_function; GO:0003824,catalytic activity; GO:0008194,UDP-glycosyltransferase activity; GO:0016740,transferase activity; GO:0016757,transferase activity, transferring glycosyl groups; GO:0016758,transferase activity, transferring hexosyl groups; GO:0035251,UDP-glucosyltransferase activity; GO:0046527,gl…	Sucrose synthase	--	--	--
Cluster-100006.4	209	K00695 sucrose synthase [EC:2.4.1.13] | (RefSeq) sucrose synthase 2 (A)	ko00500: Starch and sucrose metabolism; ko01100: Metabolic pathways; ko01110: Biosynthesis of secondary metabolites	unnamed protein product [Ananas comosus var. bracteatus]	SUS2_TULGE RecName: Full=Sucrose synthase 2; EC=2.4.1.13; AltName: Full=Sucrose-UDP glucosyltransferase 2;	A0A1D1XKR8_9ARAE RecName: Full=Sucrose synthase {ECO:0000256|ARBA:ARBA00012540}; EC=2.4.1.13 {ECO:0000256|ARBA:ARBA00012540}; Flags: Fragment;	Glycosyltransferase	GO:0016157,sucrose synthase activity; GO:0005985,sucrose metabolic process; GO:0003674,molecular_function; GO:0003824,catalytic activity; GO:0008194,UDP-glycosyltransferase activity; GO:0016740,transferase activity; GO:0016757,transferase activity, transferring glycosyl groups; GO:0016758,transferase activity, transferring hexosyl groups; GO:0035251,UDP-glucosyltransferase activity; GO:0046527,gl…	--	--	--	--
Cluster-100006.40	356	K00695 sucrose synthase [EC:2.4.1.13] | (RefSeq) sucrose synthase 2-like (A)	ko00500: Starch and sucrose metabolism; ko01100: Metabolic pathways; ko01110: Biosynthesis of secondary metabolites	uncharacterized protein A4U43_C07F36670 [Asparagus officinalis]	SUS2_HORVU RecName: Full=Sucrose synthase 2; EC=2.4.1.13; AltName: Full=Sucrose-UDP glucosyltransferase 2;	A0A5P1EHM8_ASPOF RecName: Full=Sucrose synthase {ECO:0000256|ARBA:ARBA00012540, ECO:0000256|RuleBase:RU280817}; EC=2.4.1.13 {ECO:0000256|ARBA:ARBA00012540, ECO:0000256|RuleBase:RU280817};	Glycosyltransferase	GO:0016157,sucrose synthase activity; GO:0005985,sucrose metabolic process; GO:0003674,molecular_function; GO:0003824,catalytic activity; GO:0008194,UDP-glycosyltransferase activity; GO:0016740,transferase activity; GO:0016757,transferase activity, transferring glycosyl groups; GO:0016758,transferase activity, transferring hexosyl groups; GO:0035251,UDP-glucosyltransferase activity; GO:0046527,gl…	--	--	--	--
Cluster-100006.41	459	K00695 sucrose synthase [EC:2.4.1.13] | (RefSeq) sucrose synthase 2-like (A)	ko00500: Starch and sucrose metabolism; ko01100: Metabolic pathways; ko01110: Biosynthesis of secondary metabolites	hypothetical protein OsI_22001 [Oryza sativa Indica Group]	SUS_BETVU RecName: Full=Sucrose synthase; EC=2.4.1.13; AltName: Full=Sucrose-UDP glucosyltransferase; Flags: Fragment;	A2YA89_ORYSI RecName: Full=Sucrose synthase {ECO:0000256|ARBA:ARBA00012540}; EC=2.4.1.13 {ECO:0000256|ARBA:ARBA00012540};	Glycosyltransferase	GO:0016157,sucrose synthase activity; GO:0010555,response to mannitol; GO:0009414,response to water deprivation; GO:0010431,seed maturation; GO:0005982,starch metabolic process; GO:0005985,sucrose metabolic process; GO:0003674,molecular_function; GO:0003824,catalytic activity; GO:0008194,UDP-glycosyltransferase activity; GO:0016740,transferase activity; GO:0016757,transferase activity, transferri…	--	--	--	--
Cluster-100006.42	370	K00695 sucrose synthase [EC:2.4.1.13] | (RefSeq) sucrose synthase 2 (A)	ko00500: Starch and sucrose metabolism; ko01100: Metabolic pathways; ko01110: Biosynthesis of secondary metabolites	sucrose synthase 1-like [Phalaenopsis equestris]	SUS1_HORVU RecName: Full=Sucrose synthase 1; EC=2.4.1.13; AltName: Full=Sucrose-UDP glucosyltransferase 1;	A0A1D1XKR8_9ARAE RecName: Full=Sucrose synthase {ECO:0000256|ARBA:ARBA00012540}; EC=2.4.1.13 {ECO:0000256|ARBA:ARBA00012540}; Flags: Fragment;	Glycosyltransferase	GO:0016157,sucrose synthase activity; GO:0005985,sucrose metabolic process; GO:0003674,molecular_function; GO:0003824,catalytic activity; GO:0008194,UDP-glycosyltransferase activity; GO:0016740,transferase activity; GO:0016757,transferase activity, transferring glycosyl groups; GO:0016758,transferase activity, transferring hexosyl groups; GO:0035251,UDP-glucosyltransferase activity; GO:0046527,gl…	--	--	--	--
Cluster-100006.43	869	K13993 HSP20 family protein | (RefSeq) 22.7 kDa class IV heat shock protein-like (A)	ko04141: Protein processing in endoplasmic reticulum	22.7 kDa class IV heat shock protein-like [Asparagus officinalis]	HS219_ORYSJ RecName: Full=21.9 kDa heat shock protein; Short=OsHsp21.9; Flags: Precursor;	A0A5P1E8G1_ASPOF RecName: Full=SHSP domain-containing protein {ECO:0000259|PROSITE:PS01031};	Molecular chaperone (small heat-shock protein Hsp26/Hsp42)	GO:0005783,endoplasmic reticulum; GO:0043621,protein self-association; GO:0051082,unfolded protein binding; GO:0051259,protein complex oligomerization; GO:0006457,protein folding; GO:0009408,response to heat; GO:0042542,response to hydrogen peroxide; GO:0009651,response to salt stress; GO:0003674,molecular_function; GO:0005488,binding; GO:0005515,protein binding; GO:0008150,biological_process; GO…	Hsp20/alpha crystallin family	--	--	--
Cluster-100006.44	1617	K19001 ATP-dependent DNA helicase | (RefSeq) ATP-dependent DNA helicase DDM1 isoform X1 (A)	--	ATP-dependent DNA helicase DDM1 isoform X2 [Asparagus officinalis]	DDM1_ARATH RecName: Full=ATP-dependent DNA helicase DDM1; EC=3.6.4.12; AltName: Full=Protein CHROMATIN REMODELING 1 {ECO:0000303|PubMed:16547115}; Short=AtCHR1; Short=CHR01; AltName: Full=Protein DECREASED DNA METHYLATION 1; Short=AtDDM1; AltName: Full=Protein SOMNIFEROUS 1; AltName: Full=SWI/SNF2-related matrix-associated actin-dependent regulator of chromatin DDM1;	A0A6I9S1M1_ELAGV SubName: Full=ATP-dependent DNA helicase DDM1 isoform X2 {ECO:0000313|RefSeq:XP_010936285.1};	Chromatin remodeling complex WSTF-ISWI, small subunit	GO:0000786,nucleosome; GO:0005634,nucleus; GO:0005524,ATP binding; GO:0016887,ATPase activity; GO:0008094,DNA-dependent ATPase activity; GO:0140658,NA; GO:0003677,DNA binding; GO:0003678,DNA helicase activity; GO:0006346,DNA methylation-dependent heterochromatin assembly; GO:0009294,DNA mediated transformation; GO:0090241,negative regulation of histone H4 acetylation; GO:0051574,positive regulati…	SNF2-related domain	SNF2	TR	SNF2
Cluster-100006.45	3603	K19001 ATP-dependent DNA helicase | (RefSeq) ATP-dependent DNA helicase DDM1 isoform X1 (A)	--	ATP-dependent DNA helicase DDM1 isoform X2 [Asparagus officinalis]	DDM1_ARATH RecName: Full=ATP-dependent DNA helicase DDM1; EC=3.6.4.12; AltName: Full=Protein CHROMATIN REMODELING 1 {ECO:0000303|PubMed:16547115}; Short=AtCHR1; Short=CHR01; AltName: Full=Protein DECREASED DNA METHYLATION 1; Short=AtDDM1; AltName: Full=Protein SOMNIFEROUS 1; AltName: Full=SWI/SNF2-related matrix-associated actin-dependent regulator of chromatin DDM1;	A0A5P1E400_ASPOF SubName: Full=Uncharacterized protein {ECO:0000313|EMBL:ONK55756.1};	Chromatin remodeling complex WSTF-ISWI, small subunit	GO:0000786,nucleosome; GO:0005634,nucleus; GO:0005524,ATP binding; GO:0016887,ATPase activity; GO:0008094,DNA-dependent ATPase activity; GO:0140658,NA; GO:0003677,DNA binding; GO:0003678,DNA helicase activity; GO:0006346,DNA methylation-dependent heterochromatin assembly; GO:0009294,DNA mediated transformation; GO:0090241,negative regulation of histone H4 acetylation; GO:0051574,positive regulati…	Hsp20/alpha crystallin family	SNF2	TR	SNF2
Cluster-100006.46	2816	K19001 ATP-dependent DNA helicase | (RefSeq) ATP-dependent DNA helicase DDM1 isoform X1 (A)	--	ATP-dependent DNA helicase DDM1 isoform X2 [Asparagus officinalis]	DDM1_ARATH RecName: Full=ATP-dependent DNA helicase DDM1; EC=3.6.4.12; AltName: Full=Protein CHROMATIN REMODELING 1 {ECO:0000303|PubMed:16547115}; Short=AtCHR1; Short=CHR01; AltName: Full=Protein DECREASED DNA METHYLATION 1; Short=AtDDM1; AltName: Full=Protein SOMNIFEROUS 1; AltName: Full=SWI/SNF2-related matrix-associated actin-dependent regulator of chromatin DDM1;	A0A5P1E400_ASPOF SubName: Full=Uncharacterized protein {ECO:0000313|EMBL:ONK55756.1};	Chromatin remodeling complex WSTF-ISWI, small subunit	GO:0000786,nucleosome; GO:0005634,nucleus; GO:0005524,ATP binding; GO:0016887,ATPase activity; GO:0008094,DNA-dependent ATPase activity; GO:0140658,NA; GO:0003677,DNA binding; GO:0003678,DNA helicase activity; GO:0006346,DNA methylation-dependent heterochromatin assembly; GO:0009294,DNA mediated transformation; GO:0090241,negative regulation of histone H4 acetylation; GO:0051574,positive regulati…	SNF2-related domain	SNF2	TR	SNF2
Cluster-100006.47	3603	K19001 ATP-dependent DNA helicase | (RefSeq) ATP-dependent DNA helicase DDM1 isoform X1 (A)	--	ATP-dependent DNA helicase DDM1 isoform X2 [Asparagus officinalis]	DDM1_ARATH RecName: Full=ATP-dependent DNA helicase DDM1; EC=3.6.4.12; AltName: Full=Protein CHROMATIN REMODELING 1 {ECO:0000303|PubMed:16547115}; Short=AtCHR1; Short=CHR01; AltName: Full=Protein DECREASED DNA METHYLATION 1; Short=AtDDM1; AltName: Full=Protein SOMNIFEROUS 1; AltName: Full=SWI/SNF2-related matrix-associated actin-dependent regulator of chromatin DDM1;	A0A5P1E400_ASPOF SubName: Full=Uncharacterized protein {ECO:0000313|EMBL:ONK55756.1};	Chromatin remodeling complex WSTF-ISWI, small subunit	GO:0000786,nucleosome; GO:0005634,nucleus; GO:0005524,ATP binding; GO:0016887,ATPase activity; GO:0008094,DNA-dependent ATPase activity; GO:0140658,NA; GO:0003677,DNA binding; GO:0003678,DNA helicase activity; GO:0006346,DNA methylation-dependent heterochromatin assembly; GO:0009294,DNA mediated transformation; GO:0090241,negative regulation of histone H4 acetylation; GO:0051574,positive regulati…	Hsp20/alpha crystallin family	SNF2	TR	SNF2
Cluster-100006.48	1229	K13993 HSP20 family protein | (RefSeq) 22.7 kDa class IV heat shock protein-like (A)	ko04141: Protein processing in endoplasmic reticulum	22.7 kDa class IV heat shock protein-like [Asparagus officinalis]	HS219_ORYSJ RecName: Full=21.9 kDa heat shock protein; Short=OsHsp21.9; Flags: Precursor;	A0A5P1E8G1_ASPOF RecName: Full=SHSP domain-containing protein {ECO:0000259|PROSITE:PS01031};	Molecular chaperone (small heat-shock protein Hsp26/Hsp42)	GO:0005783,endoplasmic reticulum; GO:0043621,protein self-association; GO:0051082,unfolded protein binding; GO:0051259,protein complex oligomerization; GO:0006457,protein folding; GO:0009408,response to heat; GO:0042542,response to hydrogen peroxide; GO:0009651,response to salt stress; GO:0003674,molecular_function; GO:0005488,binding; GO:0005515,protein binding; GO:0008150,biological_process; GO…	Hsp20/alpha crystallin family	--	--	--
Cluster-100006.49	1386	K19001 ATP-dependent DNA helicase | (RefSeq) ATP-dependent DNA helicase DDM1 isoform X1 (A)	--	ATP-dependent DNA helicase DDM1 isoform X2 [Asparagus officinalis]	DDM1_ARATH RecName: Full=ATP-dependent DNA helicase DDM1; EC=3.6.4.12; AltName: Full=Protein CHROMATIN REMODELING 1 {ECO:0000303|PubMed:16547115}; Short=AtCHR1; Short=CHR01; AltName: Full=Protein DECREASED DNA METHYLATION 1; Short=AtDDM1; AltName: Full=Protein SOMNIFEROUS 1; AltName: Full=SWI/SNF2-related matrix-associated actin-dependent regulator of chromatin DDM1;	A0A5P1E400_ASPOF SubName: Full=Uncharacterized protein {ECO:0000313|EMBL:ONK55756.1};	Chromatin remodeling complex WSTF-ISWI, small subunit	GO:0000786,nucleosome; GO:0005634,nucleus; GO:0005524,ATP binding; GO:0016887,ATPase activity; GO:0008094,DNA-dependent ATPase activity; GO:0140658,NA; GO:0003677,DNA binding; GO:0003678,DNA helicase activity; GO:0006346,DNA methylation-dependent heterochromatin assembly; GO:0009294,DNA mediated transformation; GO:0090241,negative regulation of histone H4 acetylation; GO:0051574,positive regulati…	SNF2-related domain	SNF2	TR	SNF2
Cluster-100006.5	525	K00695 sucrose synthase [EC:2.4.1.13] | (RefSeq) sucrose synthase 1 (A)	ko00500: Starch and sucrose metabolism; ko01100: Metabolic pathways; ko01110: Biosynthesis of secondary metabolites	sucrose synthase1, partial [Elaeis guineensis]	SUS2_TULGE RecName: Full=Sucrose synthase 2; EC=2.4.1.13; AltName: Full=Sucrose-UDP glucosyltransferase 2;	A0A1D1XKR8_9ARAE RecName: Full=Sucrose synthase {ECO:0000256|ARBA:ARBA00012540}; EC=2.4.1.13 {ECO:0000256|ARBA:ARBA00012540}; Flags: Fragment;	Glycosyltransferase	GO:0016157,sucrose synthase activity; GO:0005985,sucrose metabolic process; GO:0003674,molecular_function; GO:0003824,catalytic activity; GO:0008194,UDP-glycosyltransferase activity; GO:0016740,transferase activity; GO:0016757,transferase activity, transferring glycosyl groups; GO:0016758,transferase activity, transferring hexosyl groups; GO:0035251,UDP-glucosyltransferase activity; GO:0046527,gl…	--	--	--	--
Cluster-100006.50	1315	K19001 ATP-dependent DNA helicase | (RefSeq) ATP-dependent DNA helicase DDM1 isoform X1 (A)	--	ATP-dependent DNA helicase DDM1 isoform X2 [Asparagus officinalis]	DDM1_ARATH RecName: Full=ATP-dependent DNA helicase DDM1; EC=3.6.4.12; AltName: Full=Protein CHROMATIN REMODELING 1 {ECO:0000303|PubMed:16547115}; Short=AtCHR1; Short=CHR01; AltName: Full=Protein DECREASED DNA METHYLATION 1; Short=AtDDM1; AltName: Full=Protein SOMNIFEROUS 1; AltName: Full=SWI/SNF2-related matrix-associated actin-dependent regulator of chromatin DDM1;	A0A5P1E400_ASPOF SubName: Full=Uncharacterized protein {ECO:0000313|EMBL:ONK55756.1};	Chromatin remodeling complex WSTF-ISWI, small subunit	GO:0000786,nucleosome; GO:0005634,nucleus; GO:0005524,ATP binding; GO:0016887,ATPase activity; GO:0008094,DNA-dependent ATPase activity; GO:0140658,NA; GO:0003677,DNA binding; GO:0003678,DNA helicase activity; GO:0006346,DNA methylation-dependent heterochromatin assembly; GO:0009294,DNA mediated transformation; GO:0090241,negative regulation of histone H4 acetylation; GO:0051574,positive regulati…	SNF2-related domain	SNF2	TR	SNF2
Cluster-100006.51	507	K19001 ATP-dependent DNA helicase | (RefSeq) ATP-dependent DNA helicase DDM1 isoform X1 (A)	--	uncharacterized protein A4U43_C10F670 [Asparagus officinalis]	DDM1_ARATH RecName: Full=ATP-dependent DNA helicase DDM1; EC=3.6.4.12; AltName: Full=Protein CHROMATIN REMODELING 1 {ECO:0000303|PubMed:16547115}; Short=AtCHR1; Short=CHR01; AltName: Full=Protein DECREASED DNA METHYLATION 1; Short=AtDDM1; AltName: Full=Protein SOMNIFEROUS 1; AltName: Full=SWI/SNF2-related matrix-associated actin-dependent regulator of chromatin DDM1;	A0A5P1E400_ASPOF SubName: Full=Uncharacterized protein {ECO:0000313|EMBL:ONK55756.1};	Chromatin remodeling complex WSTF-ISWI, small subunit	GO:0000786,nucleosome; GO:0005634,nucleus; GO:0005524,ATP binding; GO:0016887,ATPase activity; GO:0008094,DNA-dependent ATPase activity; GO:0140658,NA; GO:0003677,DNA binding; GO:0003678,DNA helicase activity; GO:0006346,DNA methylation-dependent heterochromatin assembly; GO:0009294,DNA mediated transformation; GO:0090241,negative regulation of histone H4 acetylation; GO:0051574,positive regulati…	--	--	--	--
Cluster-100006.52	387	K19001 ATP-dependent DNA helicase | (RefSeq) ATP-dependent DNA helicase DDM1 isoform X1 (A)	--	ATP-dependent DNA helicase DDM1 isoform X2 [Asparagus officinalis]	DDM1_ARATH RecName: Full=ATP-dependent DNA helicase DDM1; EC=3.6.4.12; AltName: Full=Protein CHROMATIN REMODELING 1 {ECO:0000303|PubMed:16547115}; Short=AtCHR1; Short=CHR01; AltName: Full=Protein DECREASED DNA METHYLATION 1; Short=AtDDM1; AltName: Full=Protein SOMNIFEROUS 1; AltName: Full=SWI/SNF2-related matrix-associated actin-dependent regulator of chromatin DDM1;	A0A5P1E400_ASPOF SubName: Full=Uncharacterized protein {ECO:0000313|EMBL:ONK55756.1};	Chromatin remodeling complex WSTF-ISWI, small subunit	GO:0000786,nucleosome; GO:0005634,nucleus; GO:0005524,ATP binding; GO:0016887,ATPase activity; GO:0008094,DNA-dependent ATPase activity; GO:0140658,NA; GO:0003677,DNA binding; GO:0003678,DNA helicase activity; GO:0006346,DNA methylation-dependent heterochromatin assembly; GO:0009294,DNA mediated transformation; GO:0090241,negative regulation of histone H4 acetylation; GO:0051574,positive regulati…	SNF2-related domain	SNF2	TR	SNF2
Cluster-100006.6	287	K00695 sucrose synthase [EC:2.4.1.13] | (RefSeq) sucrose synthase 2-like (A)	ko00500: Starch and sucrose metabolism; ko01100: Metabolic pathways; ko01110: Biosynthesis of secondary metabolites	sucrose synthase1, partial [Elaeis guineensis]	SUS1_TULGE RecName: Full=Sucrose synthase 1; EC=2.4.1.13; AltName: Full=Sucrose-UDP glucosyltransferase 1;	G8FGK7_ELAGV RecName: Full=Sucrose synthase {ECO:0000256|ARBA:ARBA00012540}; EC=2.4.1.13 {ECO:0000256|ARBA:ARBA00012540}; Flags: Fragment;	Glycosyltransferase	GO:0016157,sucrose synthase activity; GO:0005985,sucrose metabolic process; GO:0003674,molecular_function; GO:0003824,catalytic activity; GO:0008194,UDP-glycosyltransferase activity; GO:0016740,transferase activity; GO:0016757,transferase activity, transferring glycosyl groups; GO:0016758,transferase activity, transferring hexosyl groups; GO:0035251,UDP-glucosyltransferase activity; GO:0046527,gl…	--	--	--	--
Cluster-100006.7	878	K00695 sucrose synthase [EC:2.4.1.13] | (RefSeq) sucrose synthase 1 (A)	ko00500: Starch and sucrose metabolism; ko01100: Metabolic pathways; ko01110: Biosynthesis of secondary metabolites	sucrose synthase1, partial [Elaeis guineensis]	SUS1_TULGE RecName: Full=Sucrose synthase 1; EC=2.4.1.13; AltName: Full=Sucrose-UDP glucosyltransferase 1;	G8FGK7_ELAGV RecName: Full=Sucrose synthase {ECO:0000256|ARBA:ARBA00012540}; EC=2.4.1.13 {ECO:0000256|ARBA:ARBA00012540}; Flags: Fragment;	Glycosyltransferase	GO:0016157,sucrose synthase activity; GO:0005985,sucrose metabolic process; GO:0003674,molecular_function; GO:0003824,catalytic activity; GO:0008194,UDP-glycosyltransferase activity; GO:0016740,transferase activity; GO:0016757,transferase activity, transferring glycosyl groups; GO:0016758,transferase activity, transferring hexosyl groups; GO:0035251,UDP-glucosyltransferase activity; GO:0046527,gl…	Glycosyl transferases group 1	--	--	--
Cluster-100006.8	325	K00695 sucrose synthase [EC:2.4.1.13] | (RefSeq) sucrose synthase 2 (A)	ko00500: Starch and sucrose metabolism; ko01100: Metabolic pathways; ko01110: Biosynthesis of secondary metabolites	unnamed protein product [Ananas comosus var. bracteatus]	SUS2_TULGE RecName: Full=Sucrose synthase 2; EC=2.4.1.13; AltName: Full=Sucrose-UDP glucosyltransferase 2;	A0A1D1XKR8_9ARAE RecName: Full=Sucrose synthase {ECO:0000256|ARBA:ARBA00012540}; EC=2.4.1.13 {ECO:0000256|ARBA:ARBA00012540}; Flags: Fragment;	Glycosyltransferase	GO:0016157,sucrose synthase activity; GO:0005985,sucrose metabolic process; GO:0003674,molecular_function; GO:0003824,catalytic activity; GO:0008194,UDP-glycosyltransferase activity; GO:0016740,transferase activity; GO:0016757,transferase activity, transferring glycosyl groups; GO:0016758,transferase activity, transferring hexosyl groups; GO:0035251,UDP-glucosyltransferase activity; GO:0046527,gl…	--	--	--	--
Cluster-100006.9	1020	K00695 sucrose synthase [EC:2.4.1.13] | (RefSeq) sucrose synthase 2 (A)	ko00500: Starch and sucrose metabolism; ko01100: Metabolic pathways; ko01110: Biosynthesis of secondary metabolites	sucrose synthase1, partial [Elaeis guineensis]	SUS1_TULGE RecName: Full=Sucrose synthase 1; EC=2.4.1.13; AltName: Full=Sucrose-UDP glucosyltransferase 1;	G8FGK7_ELAGV RecName: Full=Sucrose synthase {ECO:0000256|ARBA:ARBA00012540}; EC=2.4.1.13 {ECO:0000256|ARBA:ARBA00012540}; Flags: Fragment;	Glycosyltransferase	GO:0016157,sucrose synthase activity; GO:0005985,sucrose metabolic process; GO:0003674,molecular_function; GO:0003824,catalytic activity; GO:0008194,UDP-glycosyltransferase activity; GO:0016740,transferase activity; GO:0016757,transferase activity, transferring glycosyl groups; GO:0016758,transferase activity, transferring hexosyl groups; GO:0035251,UDP-glucosyltransferase activity; GO:0046527,gl…	Glycosyl transferases group 1	--	--	--
Cluster-100007.0	773	--	--	--	--	--	--	--	--	--	--	--
Cluster-100008.0	544	--	--	--	--	--	--	--	--	--	--	--
Cluster-100009.0	1442	--	--	--	--	--	--	--	--	--	--	--
Cluster-100009.1	1478	--	--	--	--	--	--	--	--	--	--	--
Cluster-100009.2	1501	--	--	--	--	--	--	--	--	--	--	--
Cluster-100009.3	2124	--	--	--	--	--	--	--	--	--	--	--
Cluster-100009.4	1901	--	--	--	--	--	--	--	--	--	--	--
Cluster-100009.5	1689	--	--	--	--	--	--	--	--	--	--	--
Cluster-10001.0	384	--	--	--	--	--	--	--	--	--	--	--
Cluster-100010.0	1232	--	--	--	--	--	--	--	--	--	--	--
Cluster-100010.1	1239	--	--	--	--	--	--	--	--	--	--	--
Cluster-100011.0	273	--	--	--	--	--	--	--	--	--	--	--
Cluster-100011.1	360	--	--	--	--	--	--	--	--	--	--	--
Cluster-100012.0	1162	K03327 multidrug resistance protein, MATE family | (RefSeq) protein DETOXIFICATION 34-like (A)	--	G-type lectin S-receptor-like serine/threonine-protein kinase At5g35370 [Asparagus officinalis]	Y5537_ARATH RecName: Full=G-type lectin S-receptor-like serine/threonine-protein kinase At5g35370; EC=2.7.11.1; Flags: Precursor;	A0A5P1FGD1_ASPOF SubName: Full=Uncharacterized protein {ECO:0000313|EMBL:ONK75691.1};	--	GO:0016021,integral component of membrane; GO:0005886,plasma membrane; GO:0005524,ATP binding; GO:0005516,calmodulin binding; GO:0030246,carbohydrate binding; GO:0106310,protein serine kinase activity; GO:0004674,protein serine/threonine kinase activity; GO:0031625,ubiquitin protein ligase binding; GO:0006468,protein phosphorylation; GO:0000166,nucleotide binding; GO:0003674,molecular_function; G…	Protein kinase domain	--	--	--
Cluster-100013.0	1413	--	--	--	--	--	--	--	--	--	--	--
Cluster-100014.0	531	K20352 p24 family protein delta-1 | (RefSeq) uncharacterized protein LOC103712550 (A)	--	uncharacterized protein LOC113311123 isoform X3 [Papaver somniferum]	--	A0A834X6W6_9FABA RecName: Full=CCHC-type domain-containing protein {ECO:0000259|PROSITE:PS50158};	FOG: Reverse transcriptase	--	Domain of unknown function (DUF4283)	--	--	--
Cluster-100015.0	582	--	--	--	--	--	--	--	--	--	--	--
Cluster-100016.0	369	--	--	--	--	--	--	--	--	--	--	--
Cluster-100017.0	758	--	--	--	--	--	--	--	--	--	--	--
Cluster-100017.1	780	--	--	--	--	--	--	--	--	--	--	--
Cluster-100017.2	1215	--	--	transcriptional corepressor SEUSS isoform X2 [Phoenix dactylifera]	SEUSS_ARATH RecName: Full=Transcriptional corepressor SEUSS; Short=AtSEU;	A0A8B7D169_PHODC SubName: Full=transcriptional corepressor SEUSS isoform X2 {ECO:0000313|RefSeq:XP_008810892.2};	--	GO:0005654,nucleoplasm; GO:0005634,nucleus; GO:0005667,transcription regulator complex; GO:0003677,DNA binding; GO:0046982,protein heterodimerization activity; GO:0003714,transcription corepressor activity; GO:0030154,cell differentiation; GO:0006974,cellular response to DNA damage stimulus; GO:0071217,cellular response to external biotic stimulus; GO:0009793,embryo development ending in seed dor…	--	--	--	--
Cluster-100017.3	1311	--	--	transcriptional corepressor SEUSS isoform X2 [Phoenix dactylifera]	SEUSS_ARATH RecName: Full=Transcriptional corepressor SEUSS; Short=AtSEU;	A0A8B7D169_PHODC SubName: Full=transcriptional corepressor SEUSS isoform X2 {ECO:0000313|RefSeq:XP_008810892.2};	--	GO:0005654,nucleoplasm; GO:0005634,nucleus; GO:0005667,transcription regulator complex; GO:0003677,DNA binding; GO:0046982,protein heterodimerization activity; GO:0003714,transcription corepressor activity; GO:0030154,cell differentiation; GO:0006974,cellular response to DNA damage stimulus; GO:0071217,cellular response to external biotic stimulus; GO:0009793,embryo development ending in seed dor…	--	--	--	--
Cluster-100017.4	1308	--	--	transcriptional corepressor SEUSS isoform X2 [Phoenix dactylifera]	SEUSS_ARATH RecName: Full=Transcriptional corepressor SEUSS; Short=AtSEU;	A0A8B7D169_PHODC SubName: Full=transcriptional corepressor SEUSS isoform X2 {ECO:0000313|RefSeq:XP_008810892.2};	--	GO:0005654,nucleoplasm; GO:0005634,nucleus; GO:0005667,transcription regulator complex; GO:0003677,DNA binding; GO:0046982,protein heterodimerization activity; GO:0003714,transcription corepressor activity; GO:0030154,cell differentiation; GO:0006974,cellular response to DNA damage stimulus; GO:0071217,cellular response to external biotic stimulus; GO:0009793,embryo development ending in seed dor…	--	--	--	--
Cluster-100017.5	1314	--	--	transcriptional corepressor SEUSS isoform X2 [Phoenix dactylifera]	SEUSS_ARATH RecName: Full=Transcriptional corepressor SEUSS; Short=AtSEU;	A0A8B7D169_PHODC SubName: Full=transcriptional corepressor SEUSS isoform X2 {ECO:0000313|RefSeq:XP_008810892.2};	--	GO:0005654,nucleoplasm; GO:0005634,nucleus; GO:0005667,transcription regulator complex; GO:0003677,DNA binding; GO:0046982,protein heterodimerization activity; GO:0003714,transcription corepressor activity; GO:0030154,cell differentiation; GO:0006974,cellular response to DNA damage stimulus; GO:0071217,cellular response to external biotic stimulus; GO:0009793,embryo development ending in seed dor…	--	--	--	--
Cluster-100017.6	1204	--	--	transcriptional corepressor SEUSS isoform X2 [Phoenix dactylifera]	SEUSS_ARATH RecName: Full=Transcriptional corepressor SEUSS; Short=AtSEU;	A0A8B7D169_PHODC SubName: Full=transcriptional corepressor SEUSS isoform X2 {ECO:0000313|RefSeq:XP_008810892.2};	--	GO:0005654,nucleoplasm; GO:0005634,nucleus; GO:0005667,transcription regulator complex; GO:0003677,DNA binding; GO:0046982,protein heterodimerization activity; GO:0003714,transcription corepressor activity; GO:0030154,cell differentiation; GO:0006974,cellular response to DNA damage stimulus; GO:0071217,cellular response to external biotic stimulus; GO:0009793,embryo development ending in seed dor…	--	--	--	--
Cluster-100017.7	827	--	--	transcriptional corepressor SEUSS isoform X2 [Phoenix dactylifera]	SEUSS_ARATH RecName: Full=Transcriptional corepressor SEUSS; Short=AtSEU;	A0A8B7D169_PHODC SubName: Full=transcriptional corepressor SEUSS isoform X2 {ECO:0000313|RefSeq:XP_008810892.2};	--	GO:0005654,nucleoplasm; GO:0005634,nucleus; GO:0005667,transcription regulator complex; GO:0003677,DNA binding; GO:0046982,protein heterodimerization activity; GO:0003714,transcription corepressor activity; GO:0030154,cell differentiation; GO:0006974,cellular response to DNA damage stimulus; GO:0071217,cellular response to external biotic stimulus; GO:0009793,embryo development ending in seed dor…	--	--	--	--
Cluster-100018.0	556	--	--	--	--	--	--	--	--	--	--	--
Cluster-100018.1	927	--	--	--	--	--	--	--	--	--	--	--
Cluster-100018.2	4393	--	--	--	--	--	--	--	--	--	--	--
Cluster-100018.3	928	--	--	--	--	--	--	--	--	--	--	--
Cluster-100019.0	591	--	--	E2F-associated phosphoprotein isoform X2 [Asparagus officinalis]	--	A0A5P1FAG7_ASPOF SubName: Full=Uncharacterized protein {ECO:0000313|EMBL:ONK73631.1};	Uncharacterized conserved protein	--	E2F-associated phosphoprotein	--	--	--
Cluster-100019.1	1948	K20291 conserved oligomeric Golgi complex subunit 4 | (RefSeq) pentatricopeptide repeat-containing protein At4g01400, mitochondrial (A)	--	pentatricopeptide repeat protein AaPPR1501 [Agave angustifolia]	--	A0A8J5GFC6_ZINOF SubName: Full=Uncharacterized protein {ECO:0000313|EMBL:KAG6500518.1};	--	--	PPR repeat family	--	--	--
Cluster-100019.2	1404	K20291 conserved oligomeric Golgi complex subunit 4 | (RefSeq) pentatricopeptide repeat-containing protein At4g01400, mitochondrial (A)	--	pentatricopeptide repeat protein AaPPR1501 [Agave angustifolia]	SPSA1_CITUN RecName: Full=Probable sucrose-phosphate synthase 1; EC=2.4.1.14; AltName: Full=UDP-glucose-fructose-phosphate glucosyltransferase 1;	A0A8J5GFC6_ZINOF SubName: Full=Uncharacterized protein {ECO:0000313|EMBL:KAG6500518.1};	Glycosyltransferase	GO:0016157,sucrose synthase activity; GO:0046524,sucrose-phosphate synthase activity; GO:0005986,sucrose biosynthetic process; GO:0003674,molecular_function; GO:0003824,catalytic activity; GO:0008194,UDP-glycosyltransferase activity; GO:0016740,transferase activity; GO:0016757,transferase activity, transferring glycosyl groups; GO:0016758,transferase activity, transferring hexosyl groups; GO:0035…	PPR repeat family	--	--	--
Cluster-100019.3	1706	K20291 conserved oligomeric Golgi complex subunit 4 | (RefSeq) pentatricopeptide repeat-containing protein At4g01400, mitochondrial (A)	--	pentatricopeptide repeat protein AaPPR1501 [Agave angustifolia]	--	A0A6I9R0I6_ELAGV SubName: Full=E2F-associated phosphoprotein {ECO:0000313|RefSeq:XP_010918405.1};	Uncharacterized conserved protein	--	PPR repeat family	--	--	--
Cluster-100019.4	541	--	--	E2F-associated phosphoprotein isoform X2 [Asparagus officinalis]	--	A0A6I9R0I6_ELAGV SubName: Full=E2F-associated phosphoprotein {ECO:0000313|RefSeq:XP_010918405.1};	Uncharacterized conserved protein	--	E2F-associated phosphoprotein	--	--	--
Cluster-100019.5	1026	--	--	E2F-associated phosphoprotein isoform X2 [Asparagus officinalis]	--	A0A6I9R0I6_ELAGV SubName: Full=E2F-associated phosphoprotein {ECO:0000313|RefSeq:XP_010918405.1};	Uncharacterized conserved protein	--	--	--	--	--
Cluster-100019.6	641	--	--	E2F-associated phosphoprotein isoform X2 [Asparagus officinalis]	--	A0A6I9R0I6_ELAGV SubName: Full=E2F-associated phosphoprotein {ECO:0000313|RefSeq:XP_010918405.1};	Uncharacterized conserved protein	--	E2F-associated phosphoprotein	--	--	--
Cluster-100019.7	796	--	--	E2F-associated phosphoprotein isoform X2 [Asparagus officinalis]	--	A0A6I9R0I6_ELAGV SubName: Full=E2F-associated phosphoprotein {ECO:0000313|RefSeq:XP_010918405.1};	Uncharacterized conserved protein	--	E2F-associated phosphoprotein	--	--	--
Cluster-100019.8	1656	K20291 conserved oligomeric Golgi complex subunit 4 | (RefSeq) pentatricopeptide repeat-containing protein At4g01400, mitochondrial (A)	--	pentatricopeptide repeat protein AaPPR1501 [Agave angustifolia]	--	A0A8J5GFC6_ZINOF SubName: Full=Uncharacterized protein {ECO:0000313|EMBL:KAG6500518.1};	--	--	PPR repeat family	--	--	--
Cluster-100019.9	1345	K20291 conserved oligomeric Golgi complex subunit 4 | (RefSeq) pentatricopeptide repeat-containing protein At4g01400, mitochondrial (A)	--	pentatricopeptide repeat protein AaPPR1501 [Agave angustifolia]	--	A0A8J5GFC6_ZINOF SubName: Full=Uncharacterized protein {ECO:0000313|EMBL:KAG6500518.1};	--	--	PPR repeat family	--	--	--
Cluster-10002.0	294	--	--	--	--	--	--	--	--	--	--	--
Cluster-100020.0	4606	--	--	zinc finger MYM-type protein 1-like [Prunus dulcis]	--	--	--	--	--	--	--	--
Cluster-100021.0	725	--	--	--	--	--	--	--	--	--	--	--
Cluster-100022.0	391	--	--	--	--	--	--	--	--	--	--	--
Cluster-100023.0	863	--	--	--	--	--	--	--	--	--	--	--
Cluster-100024.0	1189	--	--	--	--	--	--	--	--	--	--	--
Cluster-100025.0	405	--	--	--	--	--	--	--	--	--	--	--
Cluster-100026.0	460	--	--	--	--	--	--	--	--	--	--	--
Cluster-100027.0	3095	--	--	--	--	--	--	--	--	--	--	--
Cluster-100028.0	522	--	--	--	--	--	--	--	--	--	--	--
Cluster-100029.0	552	K15718 linoleate 9S-lipoxygenase [EC:1.13.11.58] | (RefSeq) probable linoleate 9S-lipoxygenase 4 (A)	ko00591: Linoleic acid metabolism	unnamed protein product [Prunus armeniaca]	--	A0A6J5VCW3_PRUAR RecName: Full=Retrotrans_gag domain-containing protein {ECO:0000259|Pfam:PF03732};	FOG: Transposon-encoded proteins with TYA, reverse transcriptase, integrase domains in various combinations	--	--	--	--	--
Cluster-10003.0	409	--	--	--	--	--	--	--	--	--	--	--
Cluster-100030.0	548	K01051 pectinesterase [EC:3.1.1.11] | (RefSeq) probable pectinesterase/pectinesterase inhibitor 20 (A)	ko00040: Pentose and glucuronate interconversions; ko01100: Metabolic pathways	probable pectinesterase/pectinesterase inhibitor 20 [Quercus suber]	PME7_ARATH RecName: Full=Probable pectinesterase/pectinesterase inhibitor 7; Includes: RecName: Full=Pectinesterase inhibitor 7; AltName: Full=Pectin methylesterase inhibitor 7; Includes: RecName: Full=Pectinesterase 7; Short=PE 7; EC=3.1.1.11; AltName: Full=Pectin methylesterase 1; Short=AtPME1; AltName: Full=Pectin methylesterase 7; Flags: Precursor;	A0A068VC29_COFCA RecName: Full=Pectinesterase {ECO:0000256|ARBA:ARBA00013229, ECO:0000256|RuleBase:RU000589}; EC=3.1.1.11 {ECO:0000256|ARBA:ARBA00013229, ECO:0000256|RuleBase:RU000589};	--	GO:0005576,extracellular region; GO:0045330,aspartyl esterase activity; GO:0030599,pectinesterase activity; GO:0046910,pectinesterase inhibitor activity; GO:0042545,cell wall modification; GO:0045490,pectin catabolic process; GO:0003674,molecular_function; GO:0003824,catalytic activity; GO:0016787,hydrolase activity; GO:0016788,hydrolase activity, acting on ester bonds; GO:0052689,carboxylic este…	Pectinesterase	--	--	--
Cluster-100031.0	1209	--	--	--	--	--	--	--	--	--	--	--
Cluster-100032.0	324	--	--	hypothetical protein IEQ34_019580 [Dendrobium chrysotoxum]	--	A0A835UVX5_VANPL RecName: Full=PlsC domain-containing protein {ECO:0000259|SMART:SM00563};	--	--	--	--	--	--
Cluster-100033.0	700	--	--	--	--	--	--	--	--	--	--	--
Cluster-100034.0	2655	K22733 magnesium transporter | (RefSeq) uncharacterized protein LOC102612526 (A)	--	pentatricopeptide repeat protein AaPPR1559 [Agave angustifolia]	PPR88_ARATH RecName: Full=Pentatricopeptide repeat-containing protein At1g62260, mitochondrial; Flags: Precursor;	A0A6I9RHC5_ELAGV SubName: Full=pentatricopeptide repeat-containing protein At1g62260, mitochondrial {ECO:0000313|RefSeq:XP_010926266.1};	FOG: PPR repeat	GO:0043231,intracellular membrane-bounded organelle; GO:0005739,mitochondrion; GO:0003723,RNA binding; GO:0016554,cytidine to uridine editing; GO:0009451,RNA modification; GO:0003674,molecular_function; GO:0003676,nucleic acid binding; GO:0005488,binding; GO:0097159,organic cyclic compound binding; GO:1901363,heterocyclic compound binding; GO:0006139,nucleobase-containing compound metabolic proce…	PPR repeat	--	--	--
Cluster-100035.0	1775	--	--	--	--	--	--	--	--	--	--	--
Cluster-100036.0	2196	--	--	Uncharacterized protein LOK49_LG15G01612 [Camellia lanceoleosa]	--	--	--	--	--	--	--	--
Cluster-100037.0	1503	K25079 RNA-binding protein 42 | (RefSeq) RNA-binding protein 42-like (A)	--	uncharacterized protein LOC126605128 isoform X1 [Malus sylvestris]	--	A0A7C9AEU8_OPUST RecName: Full=Reverse transcriptase domain-containing protein {ECO:0000259|PROSITE:PS50878};	--	--	--	--	--	--
Cluster-100038.0	1773	K07198 5'-AMP-activated protein kinase, catalytic alpha subunit [EC:2.7.11.11] | (RefSeq) CBL-interacting protein kinase 5-like (A)	--	CBL-interacting protein kinase 5-like [Asparagus officinalis]	CIPK5_ORYSJ RecName: Full=CBL-interacting protein kinase 5; EC=2.7.11.1; AltName: Full=OsCIPK05;	A0A5P1FPW7_ASPOF RecName: Full=Non-specific serine/threonine protein kinase {ECO:0000256|ARBA:ARBA00012513}; EC=2.7.11.1 {ECO:0000256|ARBA:ARBA00012513};	Serine/threonine protein kinase	GO:0005524,ATP binding; GO:0106310,protein serine kinase activity; GO:0004674,protein serine/threonine kinase activity; GO:0006468,protein phosphorylation; GO:0007165,signal transduction; GO:0000166,nucleotide binding; GO:0003674,molecular_function; GO:0005488,binding; GO:0017076,purine nucleotide binding; GO:0030554,adenyl nucleotide binding; GO:0032553,ribonucleotide binding; GO:0032555,purine …	Protein kinase domain	--	--	--
Cluster-100039.0	2058	--	--	--	--	--	--	--	--	--	--	--
Cluster-10004.0	543	--	--	--	--	--	--	--	--	--	--	--
Cluster-100040.0	490	--	--	--	--	--	--	--	--	--	--	--
Cluster-100041.0	1592	--	--	--	--	--	--	--	--	--	--	--
Cluster-100042.0	1597	K17822 DCN1-like protein 1/2 | (RefSeq) uncharacterized protein LOC109847171 isoform X1 (A)	--	uncharacterized protein LOC109847171 isoform X3 [Asparagus officinalis]	AAR3_ARATH RecName: Full=Defective in cullin neddylation protein AAR3 {ECO:0000305}; AltName: Full=Protein ANTIAUXIN-RESISTANT 3 {ECO:0000303|PubMed:17905859};	A0A5P1EHK2_ASPOF RecName: Full=Defective in cullin neddylation protein {ECO:0000256|RuleBase:RU410713};	Uncharacterized conserved protein	GO:0005634,nucleus; GO:0000151,ubiquitin ligase complex; GO:0097602,cullin family protein binding; GO:0031624,ubiquitin conjugating enzyme binding; GO:0032182,ubiquitin-like protein binding; GO:0009734,auxin-activated signaling pathway; GO:0051443,positive regulation of ubiquitin-protein transferase activity; GO:0045116,protein neddylation; GO:0003674,molecular_function; GO:0005488,binding; GO:00…	--	--	--	--
Cluster-100042.1	886	K17822 DCN1-like protein 1/2 | (RefSeq) uncharacterized protein LOC109847171 isoform X1 (A)	--	uncharacterized protein A4U43_C07F35350 [Asparagus officinalis]	AAR3_ARATH RecName: Full=Defective in cullin neddylation protein AAR3 {ECO:0000305}; AltName: Full=Protein ANTIAUXIN-RESISTANT 3 {ECO:0000303|PubMed:17905859};	A0A5P1EHK2_ASPOF RecName: Full=Defective in cullin neddylation protein {ECO:0000256|RuleBase:RU410713};	Uncharacterized conserved protein	GO:0005634,nucleus; GO:0000151,ubiquitin ligase complex; GO:0097602,cullin family protein binding; GO:0031624,ubiquitin conjugating enzyme binding; GO:0032182,ubiquitin-like protein binding; GO:0009734,auxin-activated signaling pathway; GO:0051443,positive regulation of ubiquitin-protein transferase activity; GO:0045116,protein neddylation; GO:0003674,molecular_function; GO:0005488,binding; GO:00…	Cullin binding	--	--	--
Cluster-100042.10	2090	K12667 oligosaccharyltransferase complex subunit delta (ribophorin II) | (RefSeq) dolichyl-diphosphooligosaccharide--protein glycosyltransferase subunit 2-like (A)	ko00510: N-Glycan biosynthesis; ko00513: Various types of N-glycan biosynthesis; ko01100: Metabolic pathways; ko04141: Protein processing in endoplasmic reticulum	uncharacterized protein A4U43_C10F5660 [Asparagus officinalis]	RPN2_ORYSJ RecName: Full=Dolichyl-diphosphooligosaccharide--protein glycosyltransferase subunit 2; AltName: Full=Ribophorin II; Short=RPN-II; AltName: Full=Ribophorin-2; Flags: Precursor;	A0A5P1E0X8_ASPOF RecName: Full=Dolichyl-diphosphooligosaccharide--protein glycosyltransferase subunit 2 {ECO:0000256|RuleBase:RU366029}; AltName: Full=Ribophorin-2 {ECO:0000256|RuleBase:RU366029};	Oligosaccharyltransferase, delta subunit (ribophorin II)	GO:0016021,integral component of membrane; GO:0008250,oligosaccharyltransferase complex; GO:0006487,protein N-linked glycosylation; GO:0009409,response to cold; GO:0006464,cellular protein modification process; GO:0006486,protein glycosylation; GO:0006807,nitrogen compound metabolic process; GO:0008150,biological_process; GO:0008152,metabolic process; GO:0009058,biosynthetic process; GO:0009059,m…	Oligosaccharyltransferase subunit Ribophorin II	--	--	--
Cluster-100042.11	245	K12667 oligosaccharyltransferase complex subunit delta (ribophorin II) | (RefSeq) dolichyl-diphosphooligosaccharide--protein glycosyltransferase subunit 2 (A)	ko00510: N-Glycan biosynthesis; ko00513: Various types of N-glycan biosynthesis; ko01100: Metabolic pathways; ko04141: Protein processing in endoplasmic reticulum	PREDICTED: dolichyl-diphosphooligosaccharide--protein glycosyltransferase subunit 2 [Musa acuminata subsp. malaccensis]	RPN2_ORYSJ RecName: Full=Dolichyl-diphosphooligosaccharide--protein glycosyltransferase subunit 2; AltName: Full=Ribophorin II; Short=RPN-II; AltName: Full=Ribophorin-2; Flags: Precursor;	A0A804IXP1_MUSAM RecName: Full=Dolichyl-diphosphooligosaccharide--protein glycosyltransferase subunit 2 {ECO:0000256|RuleBase:RU366029}; AltName: Full=Ribophorin-2 {ECO:0000256|RuleBase:RU366029};	Oligosaccharyltransferase, delta subunit (ribophorin II)	GO:0016021,integral component of membrane; GO:0008250,oligosaccharyltransferase complex; GO:0006487,protein N-linked glycosylation; GO:0009409,response to cold; GO:0006464,cellular protein modification process; GO:0006486,protein glycosylation; GO:0006807,nitrogen compound metabolic process; GO:0008150,biological_process; GO:0008152,metabolic process; GO:0009058,biosynthetic process; GO:0009059,m…	--	--	--	--
Cluster-100042.12	2090	K12667 oligosaccharyltransferase complex subunit delta (ribophorin II) | (RefSeq) dolichyl-diphosphooligosaccharide--protein glycosyltransferase subunit 2-like (A)	ko00510: N-Glycan biosynthesis; ko00513: Various types of N-glycan biosynthesis; ko01100: Metabolic pathways; ko04141: Protein processing in endoplasmic reticulum	uncharacterized protein A4U43_C10F5660 [Asparagus officinalis]	RPN2_ORYSJ RecName: Full=Dolichyl-diphosphooligosaccharide--protein glycosyltransferase subunit 2; AltName: Full=Ribophorin II; Short=RPN-II; AltName: Full=Ribophorin-2; Flags: Precursor;	A0A5P1E0X8_ASPOF RecName: Full=Dolichyl-diphosphooligosaccharide--protein glycosyltransferase subunit 2 {ECO:0000256|RuleBase:RU366029}; AltName: Full=Ribophorin-2 {ECO:0000256|RuleBase:RU366029};	Oligosaccharyltransferase, delta subunit (ribophorin II)	GO:0016021,integral component of membrane; GO:0008250,oligosaccharyltransferase complex; GO:0006487,protein N-linked glycosylation; GO:0009409,response to cold; GO:0006464,cellular protein modification process; GO:0006486,protein glycosylation; GO:0006807,nitrogen compound metabolic process; GO:0008150,biological_process; GO:0008152,metabolic process; GO:0009058,biosynthetic process; GO:0009059,m…	Oligosaccharyltransferase subunit Ribophorin II	--	--	--
Cluster-100042.13	1109	K17822 DCN1-like protein 1/2 | (RefSeq) uncharacterized protein LOC109847171 isoform X1 (A)	--	uncharacterized protein A4U43_C07F35350 [Asparagus officinalis]	AAR3_ARATH RecName: Full=Defective in cullin neddylation protein AAR3 {ECO:0000305}; AltName: Full=Protein ANTIAUXIN-RESISTANT 3 {ECO:0000303|PubMed:17905859};	A0A5P1EHK2_ASPOF RecName: Full=Defective in cullin neddylation protein {ECO:0000256|RuleBase:RU410713};	Uncharacterized conserved protein	GO:0005634,nucleus; GO:0000151,ubiquitin ligase complex; GO:0097602,cullin family protein binding; GO:0031624,ubiquitin conjugating enzyme binding; GO:0032182,ubiquitin-like protein binding; GO:0009734,auxin-activated signaling pathway; GO:0051443,positive regulation of ubiquitin-protein transferase activity; GO:0045116,protein neddylation; GO:0003674,molecular_function; GO:0005488,binding; GO:00…	Cullin binding	--	--	--
Cluster-100042.14	487	K12667 oligosaccharyltransferase complex subunit delta (ribophorin II) | (RefSeq) dolichyl-diphosphooligosaccharide--protein glycosyltransferase subunit 2-like (A)	ko00510: N-Glycan biosynthesis; ko00513: Various types of N-glycan biosynthesis; ko01100: Metabolic pathways; ko04141: Protein processing in endoplasmic reticulum	uncharacterized protein A4U43_C10F5660 [Asparagus officinalis]	RPN2_ORYSJ RecName: Full=Dolichyl-diphosphooligosaccharide--protein glycosyltransferase subunit 2; AltName: Full=Ribophorin II; Short=RPN-II; AltName: Full=Ribophorin-2; Flags: Precursor;	A0A5P1E0X8_ASPOF RecName: Full=Dolichyl-diphosphooligosaccharide--protein glycosyltransferase subunit 2 {ECO:0000256|RuleBase:RU366029}; AltName: Full=Ribophorin-2 {ECO:0000256|RuleBase:RU366029};	--	GO:0016021,integral component of membrane; GO:0008250,oligosaccharyltransferase complex; GO:0006487,protein N-linked glycosylation; GO:0009409,response to cold; GO:0006464,cellular protein modification process; GO:0006486,protein glycosylation; GO:0006807,nitrogen compound metabolic process; GO:0008150,biological_process; GO:0008152,metabolic process; GO:0009058,biosynthetic process; GO:0009059,m…	--	--	--	--
Cluster-100042.15	484	K12667 oligosaccharyltransferase complex subunit delta (ribophorin II) | (RefSeq) dolichyl-diphosphooligosaccharide--protein glycosyltransferase subunit 2-like (A)	ko00510: N-Glycan biosynthesis; ko00513: Various types of N-glycan biosynthesis; ko01100: Metabolic pathways; ko04141: Protein processing in endoplasmic reticulum	dolichyl-diphosphooligosaccharide--protein glycosyltransferase subunit 2-like [Asparagus officinalis]	RPN2_ORYSJ RecName: Full=Dolichyl-diphosphooligosaccharide--protein glycosyltransferase subunit 2; AltName: Full=Ribophorin II; Short=RPN-II; AltName: Full=Ribophorin-2; Flags: Precursor;	A0A5P1F4L4_ASPOF RecName: Full=Dolichyl-diphosphooligosaccharide--protein glycosyltransferase subunit 2 {ECO:0000256|RuleBase:RU366029}; AltName: Full=Ribophorin-2 {ECO:0000256|RuleBase:RU366029};	Oligosaccharyltransferase, delta subunit (ribophorin II)	GO:0016021,integral component of membrane; GO:0008250,oligosaccharyltransferase complex; GO:0006487,protein N-linked glycosylation; GO:0009409,response to cold; GO:0006464,cellular protein modification process; GO:0006486,protein glycosylation; GO:0006807,nitrogen compound metabolic process; GO:0008150,biological_process; GO:0008152,metabolic process; GO:0009058,biosynthetic process; GO:0009059,m…	--	--	--	--
Cluster-100042.16	316	K12667 oligosaccharyltransferase complex subunit delta (ribophorin II) | (RefSeq) dolichyl-diphosphooligosaccharide--protein glycosyltransferase subunit 2-like (A)	ko00510: N-Glycan biosynthesis; ko00513: Various types of N-glycan biosynthesis; ko01100: Metabolic pathways; ko04141: Protein processing in endoplasmic reticulum	uncharacterized protein A4U43_C10F5660 [Asparagus officinalis]	RPN2_ORYSJ RecName: Full=Dolichyl-diphosphooligosaccharide--protein glycosyltransferase subunit 2; AltName: Full=Ribophorin II; Short=RPN-II; AltName: Full=Ribophorin-2; Flags: Precursor;	A0A5P1E0X8_ASPOF RecName: Full=Dolichyl-diphosphooligosaccharide--protein glycosyltransferase subunit 2 {ECO:0000256|RuleBase:RU366029}; AltName: Full=Ribophorin-2 {ECO:0000256|RuleBase:RU366029};	Oligosaccharyltransferase, delta subunit (ribophorin II)	GO:0016021,integral component of membrane; GO:0008250,oligosaccharyltransferase complex; GO:0006487,protein N-linked glycosylation; GO:0009409,response to cold; GO:0006464,cellular protein modification process; GO:0006486,protein glycosylation; GO:0006807,nitrogen compound metabolic process; GO:0008150,biological_process; GO:0008152,metabolic process; GO:0009058,biosynthetic process; GO:0009059,m…	--	--	--	--
Cluster-100042.17	3661	K12667 oligosaccharyltransferase complex subunit delta (ribophorin II) | (RefSeq) dolichyl-diphosphooligosaccharide--protein glycosyltransferase subunit 2-like (A)	ko00510: N-Glycan biosynthesis; ko00513: Various types of N-glycan biosynthesis; ko01100: Metabolic pathways; ko04141: Protein processing in endoplasmic reticulum	dolichyl-diphosphooligosaccharide--protein glycosyltransferase subunit 2-like [Asparagus officinalis]	RPN2_ORYSJ RecName: Full=Dolichyl-diphosphooligosaccharide--protein glycosyltransferase subunit 2; AltName: Full=Ribophorin II; Short=RPN-II; AltName: Full=Ribophorin-2; Flags: Precursor;	A0A8B7BTV0_PHODC RecName: Full=Dolichyl-diphosphooligosaccharide--protein glycosyltransferase subunit 2 {ECO:0000256|RuleBase:RU366029}; AltName: Full=Ribophorin-2 {ECO:0000256|RuleBase:RU366029};	Oligosaccharyltransferase, delta subunit (ribophorin II)	GO:0016021,integral component of membrane; GO:0008250,oligosaccharyltransferase complex; GO:0006487,protein N-linked glycosylation; GO:0009409,response to cold; GO:0006464,cellular protein modification process; GO:0006486,protein glycosylation; GO:0006807,nitrogen compound metabolic process; GO:0008150,biological_process; GO:0008152,metabolic process; GO:0009058,biosynthetic process; GO:0009059,m…	Cullin binding	--	--	--
Cluster-100042.18	256	K12667 oligosaccharyltransferase complex subunit delta (ribophorin II) | (RefSeq) dolichyl-diphosphooligosaccharide--protein glycosyltransferase subunit 2-like (A)	ko00510: N-Glycan biosynthesis; ko00513: Various types of N-glycan biosynthesis; ko01100: Metabolic pathways; ko04141: Protein processing in endoplasmic reticulum	uncharacterized protein A4U43_C10F5660 [Asparagus officinalis]	RPN2_ORYSJ RecName: Full=Dolichyl-diphosphooligosaccharide--protein glycosyltransferase subunit 2; AltName: Full=Ribophorin II; Short=RPN-II; AltName: Full=Ribophorin-2; Flags: Precursor;	A0A5P1E0X8_ASPOF RecName: Full=Dolichyl-diphosphooligosaccharide--protein glycosyltransferase subunit 2 {ECO:0000256|RuleBase:RU366029}; AltName: Full=Ribophorin-2 {ECO:0000256|RuleBase:RU366029};	Oligosaccharyltransferase, delta subunit (ribophorin II)	GO:0016021,integral component of membrane; GO:0008250,oligosaccharyltransferase complex; GO:0006487,protein N-linked glycosylation; GO:0009409,response to cold; GO:0006464,cellular protein modification process; GO:0006486,protein glycosylation; GO:0006807,nitrogen compound metabolic process; GO:0008150,biological_process; GO:0008152,metabolic process; GO:0009058,biosynthetic process; GO:0009059,m…	--	--	--	--
Cluster-100042.19	543	K12667 oligosaccharyltransferase complex subunit delta (ribophorin II) | (RefSeq) dolichyl-diphosphooligosaccharide--protein glycosyltransferase subunit 2-like (A)	ko00510: N-Glycan biosynthesis; ko00513: Various types of N-glycan biosynthesis; ko01100: Metabolic pathways; ko04141: Protein processing in endoplasmic reticulum	dolichyl-diphosphooligosaccharide--protein glycosyltransferase subunit 2-like [Asparagus officinalis]	RPN2_ORYSJ RecName: Full=Dolichyl-diphosphooligosaccharide--protein glycosyltransferase subunit 2; AltName: Full=Ribophorin II; Short=RPN-II; AltName: Full=Ribophorin-2; Flags: Precursor;	A0A5P1F4L4_ASPOF RecName: Full=Dolichyl-diphosphooligosaccharide--protein glycosyltransferase subunit 2 {ECO:0000256|RuleBase:RU366029}; AltName: Full=Ribophorin-2 {ECO:0000256|RuleBase:RU366029};	Oligosaccharyltransferase, delta subunit (ribophorin II)	GO:0016021,integral component of membrane; GO:0008250,oligosaccharyltransferase complex; GO:0006487,protein N-linked glycosylation; GO:0009409,response to cold; GO:0006464,cellular protein modification process; GO:0006486,protein glycosylation; GO:0006807,nitrogen compound metabolic process; GO:0008150,biological_process; GO:0008152,metabolic process; GO:0009058,biosynthetic process; GO:0009059,m…	--	--	--	--
Cluster-100042.2	2090	K12667 oligosaccharyltransferase complex subunit delta (ribophorin II) | (RefSeq) dolichyl-diphosphooligosaccharide--protein glycosyltransferase subunit 2-like (A)	ko00510: N-Glycan biosynthesis; ko00513: Various types of N-glycan biosynthesis; ko01100: Metabolic pathways; ko04141: Protein processing in endoplasmic reticulum	uncharacterized protein A4U43_C10F5660 [Asparagus officinalis]	RPN2_ORYSJ RecName: Full=Dolichyl-diphosphooligosaccharide--protein glycosyltransferase subunit 2; AltName: Full=Ribophorin II; Short=RPN-II; AltName: Full=Ribophorin-2; Flags: Precursor;	A0A5P1E0X8_ASPOF RecName: Full=Dolichyl-diphosphooligosaccharide--protein glycosyltransferase subunit 2 {ECO:0000256|RuleBase:RU366029}; AltName: Full=Ribophorin-2 {ECO:0000256|RuleBase:RU366029};	Oligosaccharyltransferase, delta subunit (ribophorin II)	GO:0016021,integral component of membrane; GO:0008250,oligosaccharyltransferase complex; GO:0006487,protein N-linked glycosylation; GO:0009409,response to cold; GO:0006464,cellular protein modification process; GO:0006486,protein glycosylation; GO:0006807,nitrogen compound metabolic process; GO:0008150,biological_process; GO:0008152,metabolic process; GO:0009058,biosynthetic process; GO:0009059,m…	Oligosaccharyltransferase subunit Ribophorin II	--	--	--
Cluster-100042.20	481	K12667 oligosaccharyltransferase complex subunit delta (ribophorin II) | (RefSeq) dolichyl-diphosphooligosaccharide--protein glycosyltransferase subunit 2-like (A)	ko00510: N-Glycan biosynthesis; ko00513: Various types of N-glycan biosynthesis; ko01100: Metabolic pathways; ko04141: Protein processing in endoplasmic reticulum	uncharacterized protein A4U43_C10F5660 [Asparagus officinalis]	RPN2_ORYSJ RecName: Full=Dolichyl-diphosphooligosaccharide--protein glycosyltransferase subunit 2; AltName: Full=Ribophorin II; Short=RPN-II; AltName: Full=Ribophorin-2; Flags: Precursor;	A0A5P1E0X8_ASPOF RecName: Full=Dolichyl-diphosphooligosaccharide--protein glycosyltransferase subunit 2 {ECO:0000256|RuleBase:RU366029}; AltName: Full=Ribophorin-2 {ECO:0000256|RuleBase:RU366029};	--	GO:0016021,integral component of membrane; GO:0008250,oligosaccharyltransferase complex; GO:0006487,protein N-linked glycosylation; GO:0009409,response to cold; GO:0006464,cellular protein modification process; GO:0006486,protein glycosylation; GO:0006807,nitrogen compound metabolic process; GO:0008150,biological_process; GO:0008152,metabolic process; GO:0009058,biosynthetic process; GO:0009059,m…	--	--	--	--
Cluster-100042.21	484	K12667 oligosaccharyltransferase complex subunit delta (ribophorin II) | (RefSeq) dolichyl-diphosphooligosaccharide--protein glycosyltransferase subunit 2-like (A)	ko00510: N-Glycan biosynthesis; ko00513: Various types of N-glycan biosynthesis; ko01100: Metabolic pathways; ko04141: Protein processing in endoplasmic reticulum	dolichyl-diphosphooligosaccharide--protein glycosyltransferase subunit 2-like [Asparagus officinalis]	RPN2_ORYSJ RecName: Full=Dolichyl-diphosphooligosaccharide--protein glycosyltransferase subunit 2; AltName: Full=Ribophorin II; Short=RPN-II; AltName: Full=Ribophorin-2; Flags: Precursor;	A0A5P1F4L4_ASPOF RecName: Full=Dolichyl-diphosphooligosaccharide--protein glycosyltransferase subunit 2 {ECO:0000256|RuleBase:RU366029}; AltName: Full=Ribophorin-2 {ECO:0000256|RuleBase:RU366029};	Oligosaccharyltransferase, delta subunit (ribophorin II)	GO:0016021,integral component of membrane; GO:0008250,oligosaccharyltransferase complex; GO:0006487,protein N-linked glycosylation; GO:0009409,response to cold; GO:0006464,cellular protein modification process; GO:0006486,protein glycosylation; GO:0006807,nitrogen compound metabolic process; GO:0008150,biological_process; GO:0008152,metabolic process; GO:0009058,biosynthetic process; GO:0009059,m…	--	--	--	--
Cluster-100042.22	542	K12667 oligosaccharyltransferase complex subunit delta (ribophorin II) | (RefSeq) dolichyl-diphosphooligosaccharide--protein glycosyltransferase subunit 2-like (A)	ko00510: N-Glycan biosynthesis; ko00513: Various types of N-glycan biosynthesis; ko01100: Metabolic pathways; ko04141: Protein processing in endoplasmic reticulum	dolichyl-diphosphooligosaccharide--protein glycosyltransferase subunit 2-like [Asparagus officinalis]	RPN2_ORYSJ RecName: Full=Dolichyl-diphosphooligosaccharide--protein glycosyltransferase subunit 2; AltName: Full=Ribophorin II; Short=RPN-II; AltName: Full=Ribophorin-2; Flags: Precursor;	A0A5P1F4L4_ASPOF RecName: Full=Dolichyl-diphosphooligosaccharide--protein glycosyltransferase subunit 2 {ECO:0000256|RuleBase:RU366029}; AltName: Full=Ribophorin-2 {ECO:0000256|RuleBase:RU366029};	Oligosaccharyltransferase, delta subunit (ribophorin II)	GO:0016021,integral component of membrane; GO:0008250,oligosaccharyltransferase complex; GO:0006487,protein N-linked glycosylation; GO:0009409,response to cold; GO:0006464,cellular protein modification process; GO:0006486,protein glycosylation; GO:0006807,nitrogen compound metabolic process; GO:0008150,biological_process; GO:0008152,metabolic process; GO:0009058,biosynthetic process; GO:0009059,m…	--	--	--	--
Cluster-100042.23	1304	K12667 oligosaccharyltransferase complex subunit delta (ribophorin II) | (RefSeq) dolichyl-diphosphooligosaccharide--protein glycosyltransferase subunit 2-like (A)	ko00510: N-Glycan biosynthesis; ko00513: Various types of N-glycan biosynthesis; ko01100: Metabolic pathways; ko04141: Protein processing in endoplasmic reticulum	uncharacterized protein A4U43_C10F5660 [Asparagus officinalis]	RPN2_ORYSJ RecName: Full=Dolichyl-diphosphooligosaccharide--protein glycosyltransferase subunit 2; AltName: Full=Ribophorin II; Short=RPN-II; AltName: Full=Ribophorin-2; Flags: Precursor;	A0A5P1E0X8_ASPOF RecName: Full=Dolichyl-diphosphooligosaccharide--protein glycosyltransferase subunit 2 {ECO:0000256|RuleBase:RU366029}; AltName: Full=Ribophorin-2 {ECO:0000256|RuleBase:RU366029};	Oligosaccharyltransferase, delta subunit (ribophorin II)	GO:0016021,integral component of membrane; GO:0008250,oligosaccharyltransferase complex; GO:0006487,protein N-linked glycosylation; GO:0009409,response to cold; GO:0006464,cellular protein modification process; GO:0006486,protein glycosylation; GO:0006807,nitrogen compound metabolic process; GO:0008150,biological_process; GO:0008152,metabolic process; GO:0009058,biosynthetic process; GO:0009059,m…	Oligosaccharyltransferase subunit Ribophorin II	--	--	--
Cluster-100042.24	261	K12667 oligosaccharyltransferase complex subunit delta (ribophorin II) | (RefSeq) dolichyl-diphosphooligosaccharide--protein glycosyltransferase subunit 2-like (A)	ko00510: N-Glycan biosynthesis; ko00513: Various types of N-glycan biosynthesis; ko01100: Metabolic pathways; ko04141: Protein processing in endoplasmic reticulum	dolichyl-diphosphooligosaccharide--protein glycosyltransferase subunit 2-like [Asparagus officinalis]	--	A0A8N4F2K8_ELAGV SubName: Full=dolichyl-diphosphooligosaccharide--protein glycosyltransferase subunit 2-like {ECO:0000313|RefSeq:XP_029118131.1};	--	--	--	--	--	--
Cluster-100042.25	913	K17822 DCN1-like protein 1/2 | (RefSeq) uncharacterized protein LOC109847171 isoform X1 (A)	--	uncharacterized protein LOC109847171 isoform X3 [Asparagus officinalis]	AAR3_ARATH RecName: Full=Defective in cullin neddylation protein AAR3 {ECO:0000305}; AltName: Full=Protein ANTIAUXIN-RESISTANT 3 {ECO:0000303|PubMed:17905859};	A0A5P1EHK2_ASPOF RecName: Full=Defective in cullin neddylation protein {ECO:0000256|RuleBase:RU410713};	Uncharacterized conserved protein	GO:0005634,nucleus; GO:0000151,ubiquitin ligase complex; GO:0097602,cullin family protein binding; GO:0031624,ubiquitin conjugating enzyme binding; GO:0032182,ubiquitin-like protein binding; GO:0009734,auxin-activated signaling pathway; GO:0051443,positive regulation of ubiquitin-protein transferase activity; GO:0045116,protein neddylation; GO:0003674,molecular_function; GO:0005488,binding; GO:00…	--	--	--	--
Cluster-100042.26	451	K12667 oligosaccharyltransferase complex subunit delta (ribophorin II) | (RefSeq) dolichyl-diphosphooligosaccharide--protein glycosyltransferase subunit 2-like (A)	ko00510: N-Glycan biosynthesis; ko00513: Various types of N-glycan biosynthesis; ko01100: Metabolic pathways; ko04141: Protein processing in endoplasmic reticulum	uncharacterized protein A4U43_C10F5660 [Asparagus officinalis]	RPN2_ORYSJ RecName: Full=Dolichyl-diphosphooligosaccharide--protein glycosyltransferase subunit 2; AltName: Full=Ribophorin II; Short=RPN-II; AltName: Full=Ribophorin-2; Flags: Precursor;	A0A5P1E0X8_ASPOF RecName: Full=Dolichyl-diphosphooligosaccharide--protein glycosyltransferase subunit 2 {ECO:0000256|RuleBase:RU366029}; AltName: Full=Ribophorin-2 {ECO:0000256|RuleBase:RU366029};	--	GO:0016021,integral component of membrane; GO:0008250,oligosaccharyltransferase complex; GO:0006487,protein N-linked glycosylation; GO:0009409,response to cold; GO:0006464,cellular protein modification process; GO:0006486,protein glycosylation; GO:0006807,nitrogen compound metabolic process; GO:0008150,biological_process; GO:0008152,metabolic process; GO:0009058,biosynthetic process; GO:0009059,m…	--	--	--	--
Cluster-100042.27	690	K17822 DCN1-like protein 1/2 | (RefSeq) uncharacterized protein LOC109847171 isoform X1 (A)	--	uncharacterized protein LOC109847171 isoform X1 [Asparagus officinalis]	AAR3_ARATH RecName: Full=Defective in cullin neddylation protein AAR3 {ECO:0000305}; AltName: Full=Protein ANTIAUXIN-RESISTANT 3 {ECO:0000303|PubMed:17905859};	A0A5P1EHK2_ASPOF RecName: Full=Defective in cullin neddylation protein {ECO:0000256|RuleBase:RU410713};	Uncharacterized conserved protein	GO:0005634,nucleus; GO:0000151,ubiquitin ligase complex; GO:0097602,cullin family protein binding; GO:0031624,ubiquitin conjugating enzyme binding; GO:0032182,ubiquitin-like protein binding; GO:0009734,auxin-activated signaling pathway; GO:0051443,positive regulation of ubiquitin-protein transferase activity; GO:0045116,protein neddylation; GO:0003674,molecular_function; GO:0005488,binding; GO:00…	--	--	--	--
Cluster-100042.28	206	K12667 oligosaccharyltransferase complex subunit delta (ribophorin II) | (RefSeq) dolichyl-diphosphooligosaccharide--protein glycosyltransferase subunit 2-like (A)	ko00510: N-Glycan biosynthesis; ko00513: Various types of N-glycan biosynthesis; ko01100: Metabolic pathways; ko04141: Protein processing in endoplasmic reticulum	unnamed protein product [Ananas comosus var. bracteatus]	RPN2_ORYSJ RecName: Full=Dolichyl-diphosphooligosaccharide--protein glycosyltransferase subunit 2; AltName: Full=Ribophorin II; Short=RPN-II; AltName: Full=Ribophorin-2; Flags: Precursor;	A0A6V7PBK8_ANACO RecName: Full=Dolichyl-diphosphooligosaccharide--protein glycosyltransferase subunit 2 {ECO:0000256|RuleBase:RU366029}; AltName: Full=Ribophorin-2 {ECO:0000256|RuleBase:RU366029};	Oligosaccharyltransferase, delta subunit (ribophorin II)	GO:0016021,integral component of membrane; GO:0008250,oligosaccharyltransferase complex; GO:0006487,protein N-linked glycosylation; GO:0009409,response to cold; GO:0006464,cellular protein modification process; GO:0006486,protein glycosylation; GO:0006807,nitrogen compound metabolic process; GO:0008150,biological_process; GO:0008152,metabolic process; GO:0009058,biosynthetic process; GO:0009059,m…	--	--	--	--
Cluster-100042.29	278	--	--	--	--	--	--	--	--	--	--	--
Cluster-100042.3	3562	K12667 oligosaccharyltransferase complex subunit delta (ribophorin II) | (RefSeq) dolichyl-diphosphooligosaccharide--protein glycosyltransferase subunit 2-like (A)	ko00510: N-Glycan biosynthesis; ko00513: Various types of N-glycan biosynthesis; ko01100: Metabolic pathways; ko04141: Protein processing in endoplasmic reticulum	dolichyl-diphosphooligosaccharide--protein glycosyltransferase subunit 2-like [Asparagus officinalis]	RPN2_ORYSJ RecName: Full=Dolichyl-diphosphooligosaccharide--protein glycosyltransferase subunit 2; AltName: Full=Ribophorin II; Short=RPN-II; AltName: Full=Ribophorin-2; Flags: Precursor;	A0A8B7BTV0_PHODC RecName: Full=Dolichyl-diphosphooligosaccharide--protein glycosyltransferase subunit 2 {ECO:0000256|RuleBase:RU366029}; AltName: Full=Ribophorin-2 {ECO:0000256|RuleBase:RU366029};	Oligosaccharyltransferase, delta subunit (ribophorin II)	GO:0016021,integral component of membrane; GO:0008250,oligosaccharyltransferase complex; GO:0006487,protein N-linked glycosylation; GO:0009409,response to cold; GO:0006464,cellular protein modification process; GO:0006486,protein glycosylation; GO:0006807,nitrogen compound metabolic process; GO:0008150,biological_process; GO:0008152,metabolic process; GO:0009058,biosynthetic process; GO:0009059,m…	Cullin binding	--	--	--
Cluster-100042.30	440	--	--	--	--	--	--	--	--	--	--	--
Cluster-100042.31	565	--	--	--	--	--	--	--	--	--	--	--
Cluster-100042.32	501	--	--	--	--	--	--	--	--	--	--	--
Cluster-100042.33	482	--	--	--	--	--	--	--	--	--	--	--
Cluster-100042.4	3586	K12667 oligosaccharyltransferase complex subunit delta (ribophorin II) | (RefSeq) dolichyl-diphosphooligosaccharide--protein glycosyltransferase subunit 2-like (A)	ko00510: N-Glycan biosynthesis; ko00513: Various types of N-glycan biosynthesis; ko01100: Metabolic pathways; ko04141: Protein processing in endoplasmic reticulum	dolichyl-diphosphooligosaccharide--protein glycosyltransferase subunit 2-like [Asparagus officinalis]	RPN2_ORYSJ RecName: Full=Dolichyl-diphosphooligosaccharide--protein glycosyltransferase subunit 2; AltName: Full=Ribophorin II; Short=RPN-II; AltName: Full=Ribophorin-2; Flags: Precursor;	A0A8B7BTV0_PHODC RecName: Full=Dolichyl-diphosphooligosaccharide--protein glycosyltransferase subunit 2 {ECO:0000256|RuleBase:RU366029}; AltName: Full=Ribophorin-2 {ECO:0000256|RuleBase:RU366029};	Oligosaccharyltransferase, delta subunit (ribophorin II)	GO:0016021,integral component of membrane; GO:0008250,oligosaccharyltransferase complex; GO:0006487,protein N-linked glycosylation; GO:0009409,response to cold; GO:0006464,cellular protein modification process; GO:0006486,protein glycosylation; GO:0006807,nitrogen compound metabolic process; GO:0008150,biological_process; GO:0008152,metabolic process; GO:0009058,biosynthetic process; GO:0009059,m…	Cullin binding	--	--	--
Cluster-100042.5	325	K12667 oligosaccharyltransferase complex subunit delta (ribophorin II) | (RefSeq) dolichyl-diphosphooligosaccharide--protein glycosyltransferase subunit 2-like (A)	ko00510: N-Glycan biosynthesis; ko00513: Various types of N-glycan biosynthesis; ko01100: Metabolic pathways; ko04141: Protein processing in endoplasmic reticulum	dolichyl-diphosphooligosaccharide--protein glycosyltransferase subunit 2-like [Asparagus officinalis]	RPN2_ORYSJ RecName: Full=Dolichyl-diphosphooligosaccharide--protein glycosyltransferase subunit 2; AltName: Full=Ribophorin II; Short=RPN-II; AltName: Full=Ribophorin-2; Flags: Precursor;	A0A5P1F4L4_ASPOF RecName: Full=Dolichyl-diphosphooligosaccharide--protein glycosyltransferase subunit 2 {ECO:0000256|RuleBase:RU366029}; AltName: Full=Ribophorin-2 {ECO:0000256|RuleBase:RU366029};	Oligosaccharyltransferase, delta subunit (ribophorin II)	GO:0016021,integral component of membrane; GO:0008250,oligosaccharyltransferase complex; GO:0006487,protein N-linked glycosylation; GO:0009409,response to cold; GO:0006464,cellular protein modification process; GO:0006486,protein glycosylation; GO:0006807,nitrogen compound metabolic process; GO:0008150,biological_process; GO:0008152,metabolic process; GO:0009058,biosynthetic process; GO:0009059,m…	--	--	--	--
Cluster-100042.6	3904	K12667 oligosaccharyltransferase complex subunit delta (ribophorin II) | (RefSeq) dolichyl-diphosphooligosaccharide--protein glycosyltransferase subunit 2-like (A)	ko00510: N-Glycan biosynthesis; ko00513: Various types of N-glycan biosynthesis; ko01100: Metabolic pathways; ko04141: Protein processing in endoplasmic reticulum	dolichyl-diphosphooligosaccharide--protein glycosyltransferase subunit 2-like [Asparagus officinalis]	RPN2_ORYSJ RecName: Full=Dolichyl-diphosphooligosaccharide--protein glycosyltransferase subunit 2; AltName: Full=Ribophorin II; Short=RPN-II; AltName: Full=Ribophorin-2; Flags: Precursor;	A0A8B7BTV0_PHODC RecName: Full=Dolichyl-diphosphooligosaccharide--protein glycosyltransferase subunit 2 {ECO:0000256|RuleBase:RU366029}; AltName: Full=Ribophorin-2 {ECO:0000256|RuleBase:RU366029};	Oligosaccharyltransferase, delta subunit (ribophorin II)	GO:0016021,integral component of membrane; GO:0008250,oligosaccharyltransferase complex; GO:0006487,protein N-linked glycosylation; GO:0009409,response to cold; GO:0006464,cellular protein modification process; GO:0006486,protein glycosylation; GO:0006807,nitrogen compound metabolic process; GO:0008150,biological_process; GO:0008152,metabolic process; GO:0009058,biosynthetic process; GO:0009059,m…	Cullin binding	--	--	--
Cluster-100042.7	1120	K12667 oligosaccharyltransferase complex subunit delta (ribophorin II) | (RefSeq) dolichyl-diphosphooligosaccharide--protein glycosyltransferase subunit 2-like (A)	ko00510: N-Glycan biosynthesis; ko00513: Various types of N-glycan biosynthesis; ko01100: Metabolic pathways; ko04141: Protein processing in endoplasmic reticulum	dolichyl-diphosphooligosaccharide--protein glycosyltransferase subunit 2-like [Asparagus officinalis]	RPN2_ORYSJ RecName: Full=Dolichyl-diphosphooligosaccharide--protein glycosyltransferase subunit 2; AltName: Full=Ribophorin II; Short=RPN-II; AltName: Full=Ribophorin-2; Flags: Precursor;	A0A8B8ZM73_PHODC RecName: Full=Dolichyl-diphosphooligosaccharide--protein glycosyltransferase subunit 2 {ECO:0000256|RuleBase:RU366029}; AltName: Full=Ribophorin-2 {ECO:0000256|RuleBase:RU366029};	Oligosaccharyltransferase, delta subunit (ribophorin II)	GO:0016021,integral component of membrane; GO:0008250,oligosaccharyltransferase complex; GO:0006487,protein N-linked glycosylation; GO:0009409,response to cold; GO:0006464,cellular protein modification process; GO:0006486,protein glycosylation; GO:0006807,nitrogen compound metabolic process; GO:0008150,biological_process; GO:0008152,metabolic process; GO:0009058,biosynthetic process; GO:0009059,m…	Oligosaccharyltransferase subunit Ribophorin II	--	--	--
Cluster-100042.8	268	K12667 oligosaccharyltransferase complex subunit delta (ribophorin II) | (RefSeq) dolichyl-diphosphooligosaccharide--protein glycosyltransferase subunit 2-like (A)	ko00510: N-Glycan biosynthesis; ko00513: Various types of N-glycan biosynthesis; ko01100: Metabolic pathways; ko04141: Protein processing in endoplasmic reticulum	dolichyl-diphosphooligosaccharide--protein glycosyltransferase subunit 2-like [Asparagus officinalis]	RPN2_ORYSJ RecName: Full=Dolichyl-diphosphooligosaccharide--protein glycosyltransferase subunit 2; AltName: Full=Ribophorin II; Short=RPN-II; AltName: Full=Ribophorin-2; Flags: Precursor;	A0A5P1F4L4_ASPOF RecName: Full=Dolichyl-diphosphooligosaccharide--protein glycosyltransferase subunit 2 {ECO:0000256|RuleBase:RU366029}; AltName: Full=Ribophorin-2 {ECO:0000256|RuleBase:RU366029};	Oligosaccharyltransferase, delta subunit (ribophorin II)	GO:0016021,integral component of membrane; GO:0008250,oligosaccharyltransferase complex; GO:0006487,protein N-linked glycosylation; GO:0009409,response to cold; GO:0006464,cellular protein modification process; GO:0006486,protein glycosylation; GO:0006807,nitrogen compound metabolic process; GO:0008150,biological_process; GO:0008152,metabolic process; GO:0009058,biosynthetic process; GO:0009059,m…	--	--	--	--
Cluster-100042.9	2532	K12667 oligosaccharyltransferase complex subunit delta (ribophorin II) | (RefSeq) dolichyl-diphosphooligosaccharide--protein glycosyltransferase subunit 2-like (A)	ko00510: N-Glycan biosynthesis; ko00513: Various types of N-glycan biosynthesis; ko01100: Metabolic pathways; ko04141: Protein processing in endoplasmic reticulum	dolichyl-diphosphooligosaccharide--protein glycosyltransferase subunit 2-like [Asparagus officinalis]	RPN2_ORYSJ RecName: Full=Dolichyl-diphosphooligosaccharide--protein glycosyltransferase subunit 2; AltName: Full=Ribophorin II; Short=RPN-II; AltName: Full=Ribophorin-2; Flags: Precursor;	A0A8B7BTV0_PHODC RecName: Full=Dolichyl-diphosphooligosaccharide--protein glycosyltransferase subunit 2 {ECO:0000256|RuleBase:RU366029}; AltName: Full=Ribophorin-2 {ECO:0000256|RuleBase:RU366029};	Oligosaccharyltransferase, delta subunit (ribophorin II)	GO:0016021,integral component of membrane; GO:0008250,oligosaccharyltransferase complex; GO:0006487,protein N-linked glycosylation; GO:0009409,response to cold; GO:0006464,cellular protein modification process; GO:0006486,protein glycosylation; GO:0006807,nitrogen compound metabolic process; GO:0008150,biological_process; GO:0008152,metabolic process; GO:0009058,biosynthetic process; GO:0009059,m…	Oligosaccharyltransferase subunit Ribophorin II	--	--	--
Cluster-100043.0	528	--	--	--	--	--	--	--	--	--	--	--
Cluster-100044.0	1031	K01507 inorganic pyrophosphatase [EC:3.6.1.1] | (RefSeq) inorganic pyrophosphatase-like (A)	ko00190: Oxidative phosphorylation	Transposon Ty3-G Gag-Pol polyprotein [Vitis vinifera]	--	A0A2N9IE13_FAGSY RecName: Full=Integrase catalytic domain-containing protein {ECO:0000259|PROSITE:PS50994};	FOG: Transposon-encoded proteins with TYA, reverse transcriptase, integrase domains in various combinations	--	--	--	--	--
Cluster-100045.0	782	--	--	--	--	--	--	--	--	--	--	--
Cluster-100045.1	1801	--	--	--	--	--	--	--	--	--	--	--
Cluster-100046.0	1613	--	--	--	--	--	--	--	--	--	--	--
Cluster-100047.0	1136	--	--	--	--	--	--	--	--	--	--	--
Cluster-100048.0	1423	--	--	--	--	--	--	--	--	--	--	--
Cluster-100049.0	807	--	--	--	--	--	--	--	--	--	--	--
Cluster-100049.1	786	--	--	--	--	--	--	--	--	--	--	--
Cluster-100049.2	787	--	--	--	--	--	--	--	--	--	--	--
Cluster-100049.3	807	--	--	--	--	--	--	--	--	--	--	--
Cluster-100049.4	518	--	--	--	--	--	--	--	--	--	--	--
Cluster-10005.0	566	--	--	--	--	--	--	--	--	--	--	--
Cluster-100050.0	694	--	--	--	--	--	--	--	--	--	--	--
Cluster-100051.0	821	--	--	--	--	--	--	--	--	--	--	--
Cluster-100052.0	1040	--	--	--	--	--	--	--	--	--	--	--
Cluster-100052.1	1574	--	--	--	--	--	--	--	--	--	--	--
Cluster-100053.0	894	--	--	--	--	--	--	--	--	--	--	--
Cluster-100054.0	781	--	--	unnamed protein product [Arabis nemorensis]	SUMO1_ORYSJ RecName: Full=Small ubiquitin-related modifier 1; Short=OsSUMO1; AltName: Full=Ubiquitin-like protein SMT3;	A0A565CRL3_9BRAS RecName: Full=Small ubiquitin-related modifier {ECO:0000256|RuleBase:RU361190}; Short=SUMO {ECO:0000256|RuleBase:RU361190};	Ubiquitin-like proteins	GO:0005737,cytoplasm; GO:0005634,nucleus; GO:0031386,protein tag; GO:0044389,ubiquitin-like protein ligase binding; GO:0016925,protein sumoylation; GO:0003674,molecular_function; GO:0005488,binding; GO:0005515,protein binding; GO:0019899,enzyme binding; GO:0006464,cellular protein modification process; GO:0006807,nitrogen compound metabolic process; GO:0008150,biological_process; GO:0008152,metab…	Ubiquitin-2 like Rad60 SUMO-like	--	--	--
Cluster-100055.0	987	K15104 solute carrier family 25 (mitochondrial oxoglutarate transporter), member 11 | (RefSeq) mitochondrial dicarboxylate/tricarboxylate transporter DTC (A)	--	mitochondrial dicarboxylate/tricarboxylate transporter DTC [Cocos nucifera]	DTC_ARATH RecName: Full=Mitochondrial dicarboxylate/tricarboxylate transporter DTC; AltName: Full=Dicarboxylate/tricarboxylate carrier;	A0A8K0I4E7_COCNU SubName: Full=Mitochondrial dicarboxylate/tricarboxylate transporter DTC {ECO:0000313|EMBL:KAG1335259.1};	Mitochondrial oxoglutarate/malate carrier proteins	GO:0009941,chloroplast envelope; GO:0016021,integral component of membrane; GO:0005743,mitochondrial inner membrane; GO:0005739,mitochondrion; GO:0009505,plant-type cell wall; GO:0000325,plant-type vacuole; GO:0009506,plasmodesma; GO:0009536,plastid; GO:0005310,dicarboxylic acid transmembrane transporter activity; GO:0022857,transmembrane transporter activity; GO:0015142,tricarboxylic acid transm…	Mitochondrial carrier protein	--	--	--
Cluster-100056.0	702	--	--	--	--	--	--	--	--	--	--	--
Cluster-100057.0	430	--	--	uncharacterized protein LOC109819535 [Asparagus officinalis]	--	A0A3L6QPX0_PANMI SubName: Full=Uncharacterized protein {ECO:0000313|EMBL:RLM85890.1};	--	--	--	--	--	--
Cluster-100057.1	859	--	--	uncharacterized protein LOC109819535 [Asparagus officinalis]	--	A0A843XC96_COLES SubName: Full=Uncharacterized protein {ECO:0000313|EMBL:MQM16890.1};	--	--	Neprosin activation peptide	--	--	--
Cluster-100057.2	872	--	--	uncharacterized protein LOC109819535 [Asparagus officinalis]	--	A0A8K0N408_COCNU SubName: Full=Uncharacterized protein {ECO:0000313|EMBL:KAG1347602.1};	--	--	Neprosin	--	--	--
Cluster-100057.3	1016	--	--	uncharacterized protein LOC109819535 [Asparagus officinalis]	--	A0A8K0N408_COCNU SubName: Full=Uncharacterized protein {ECO:0000313|EMBL:KAG1347602.1};	--	--	Neprosin	--	--	--
Cluster-100057.4	1045	--	--	uncharacterized protein LOC109819535 [Asparagus officinalis]	--	A0A8K0N408_COCNU SubName: Full=Uncharacterized protein {ECO:0000313|EMBL:KAG1347602.1};	--	--	Neprosin	--	--	--
Cluster-100057.5	1035	--	--	uncharacterized protein LOC109819535 [Asparagus officinalis]	--	A0A8K0N408_COCNU SubName: Full=Uncharacterized protein {ECO:0000313|EMBL:KAG1347602.1};	--	--	Neprosin	--	--	--
Cluster-100057.6	582	K12403 AP-4 complex subunit sigma-1 | (RefSeq) AP-4 complex subunit sigma-like isoform X1 (A)	--	uncharacterized protein LOC105054863 [Elaeis guineensis]	--	A0A6I9RYW0_ELAGV SubName: Full=uncharacterized protein LOC105054863 {ECO:0000313|RefSeq:XP_010934792.1};	--	--	Neprosin activation peptide	--	--	--
Cluster-100057.7	444	--	--	PREDICTED: uncharacterized protein LOC103989421 [Musa acuminata subsp. malaccensis]	--	A0A804JMG4_MUSAM SubName: Full=(wild Malaysian banana) hypothetical protein {ECO:0000313|EMBL:CAG1847961.1};	--	--	--	--	--	--
Cluster-100058.0	374	--	--	--	--	--	--	--	--	--	--	--
Cluster-100059.0	1664	--	--	--	--	--	--	--	--	--	--	--
Cluster-10006.0	454	--	--	--	--	--	--	--	--	--	--	--
Cluster-100060.0	339	--	--	--	--	--	--	--	--	--	--	--
Cluster-100061.0	2089	--	--	uncharacterized protein LOC109848291 [Asparagus officinalis]	--	A0A5P1EDN5_ASPOF SubName: Full=Uncharacterized protein {ECO:0000313|EMBL:ONK63962.1};	--	--	Root cap	--	--	--
Cluster-100061.1	1210	--	--	uncharacterized protein LOC109848291 [Asparagus officinalis]	--	A0A5P1EDN5_ASPOF SubName: Full=Uncharacterized protein {ECO:0000313|EMBL:ONK63962.1};	--	--	Root cap	--	--	--
Cluster-100062.0	898	--	--	--	--	--	--	--	--	--	--	--
Cluster-100063.0	354	--	--	--	--	--	--	--	--	--	--	--
Cluster-100064.0	358	K09291 nucleoprotein TPR | (RefSeq) nuclear-pore anchor (A)	ko03013: Nucleocytoplasmic transport	uncharacterized protein A4U43_C03F32060 [Asparagus officinalis]	--	A0A5P1FIQ1_ASPOF RecName: Full=TPR_MLP1_2 domain-containing protein {ECO:0000259|Pfam:PF07926};	--	--	--	--	--	--
Cluster-100064.1	534	K09291 nucleoprotein TPR | (RefSeq) nuclear-pore anchor (A)	ko03013: Nucleocytoplasmic transport	uncharacterized protein A4U43_C03F32060 [Asparagus officinalis]	--	A0A5P1FIQ1_ASPOF RecName: Full=TPR_MLP1_2 domain-containing protein {ECO:0000259|Pfam:PF07926};	--	--	Occludin homology domain	--	--	--
Cluster-100064.10	266	K09291 nucleoprotein TPR | (RefSeq) nuclear-pore anchor (A)	ko03013: Nucleocytoplasmic transport	uncharacterized protein A4U43_C03F32060 [Asparagus officinalis]	NUA_ARATH RecName: Full=Nuclear-pore anchor {ECO:0000303|PubMed:17513499, ECO:0000303|PubMed:21189294}; AltName: Full=Protein TRANSLOCATED PROMOTER REGION {ECO:0000303|PubMed:17535820}; Short=AtTPR;	A0A5P1FIQ1_ASPOF RecName: Full=TPR_MLP1_2 domain-containing protein {ECO:0000259|Pfam:PF07926};	Uncharacterized conserved coiled-coil protein	GO:0005739,mitochondrion; GO:0005635,nuclear envelope; GO:0031965,nuclear membrane; GO:0005643,nuclear pore; GO:0005730,nucleolus; GO:0009506,plasmodesma; GO:0017056,structural constituent of nuclear pore; GO:0006406,mRNA export from nucleus; GO:0009910,negative regulation of flower development; GO:0033234,negative regulation of protein sumoylation; GO:0016973,poly(A)+ mRNA export from nucleus; G…	--	--	--	--
Cluster-100064.11	2196	K09291 nucleoprotein TPR | (RefSeq) nuclear-pore anchor (A)	ko03013: Nucleocytoplasmic transport	uncharacterized protein A4U43_C03F32060 [Asparagus officinalis]	--	A0A5P1FIQ1_ASPOF RecName: Full=TPR_MLP1_2 domain-containing protein {ECO:0000259|Pfam:PF07926};	--	--	--	--	--	--
Cluster-100064.12	2318	K09291 nucleoprotein TPR | (RefSeq) nuclear-pore anchor (A)	ko03013: Nucleocytoplasmic transport	uncharacterized protein A4U43_C03F32060 [Asparagus officinalis]	--	A0A5P1FIQ1_ASPOF RecName: Full=TPR_MLP1_2 domain-containing protein {ECO:0000259|Pfam:PF07926};	--	--	--	--	--	--
Cluster-100064.13	697	K09291 nucleoprotein TPR | (RefSeq) nuclear-pore anchor (A)	ko03013: Nucleocytoplasmic transport	uncharacterized protein A4U43_C03F32060 [Asparagus officinalis]	NUA_ARATH RecName: Full=Nuclear-pore anchor {ECO:0000303|PubMed:17513499, ECO:0000303|PubMed:21189294}; AltName: Full=Protein TRANSLOCATED PROMOTER REGION {ECO:0000303|PubMed:17535820}; Short=AtTPR;	A0A5P1FIQ1_ASPOF RecName: Full=TPR_MLP1_2 domain-containing protein {ECO:0000259|Pfam:PF07926};	Uncharacterized conserved coiled-coil protein	GO:0005739,mitochondrion; GO:0005635,nuclear envelope; GO:0031965,nuclear membrane; GO:0005643,nuclear pore; GO:0005730,nucleolus; GO:0009506,plasmodesma; GO:0017056,structural constituent of nuclear pore; GO:0006406,mRNA export from nucleus; GO:0009910,negative regulation of flower development; GO:0033234,negative regulation of protein sumoylation; GO:0016973,poly(A)+ mRNA export from nucleus; G…	Homeobox associated leucine zipper	--	--	--
Cluster-100064.14	542	K09291 nucleoprotein TPR | (RefSeq) nuclear-pore anchor isoform X2 (A)	ko03013: Nucleocytoplasmic transport	hypothetical protein CUMW_067490 [Citrus unshiu]	NUA_ARATH RecName: Full=Nuclear-pore anchor {ECO:0000303|PubMed:17513499, ECO:0000303|PubMed:21189294}; AltName: Full=Protein TRANSLOCATED PROMOTER REGION {ECO:0000303|PubMed:17535820}; Short=AtTPR;	A0A2H5NQS9_CITUN RecName: Full=TPR_MLP1_2 domain-containing protein {ECO:0000259|Pfam:PF07926};	Uncharacterized conserved coiled-coil protein	GO:0005739,mitochondrion; GO:0005635,nuclear envelope; GO:0031965,nuclear membrane; GO:0005643,nuclear pore; GO:0005730,nucleolus; GO:0009506,plasmodesma; GO:0017056,structural constituent of nuclear pore; GO:0006406,mRNA export from nucleus; GO:0009910,negative regulation of flower development; GO:0033234,negative regulation of protein sumoylation; GO:0016973,poly(A)+ mRNA export from nucleus; G…	--	--	--	--
Cluster-100064.15	256	K09291 nucleoprotein TPR | (RefSeq) nuclear-pore anchor (A)	ko03013: Nucleocytoplasmic transport	nuclear-pore anchor isoform X5 [Ananas comosus]	NUA_ARATH RecName: Full=Nuclear-pore anchor {ECO:0000303|PubMed:17513499, ECO:0000303|PubMed:21189294}; AltName: Full=Protein TRANSLOCATED PROMOTER REGION {ECO:0000303|PubMed:17535820}; Short=AtTPR;	A0A6P5FCT4_ANACO SubName: Full=nuclear-pore anchor isoform X5 {ECO:0000313|RefSeq:XP_020091203.1};	Uncharacterized conserved coiled-coil protein	GO:0005739,mitochondrion; GO:0005635,nuclear envelope; GO:0031965,nuclear membrane; GO:0005643,nuclear pore; GO:0005730,nucleolus; GO:0009506,plasmodesma; GO:0017056,structural constituent of nuclear pore; GO:0006406,mRNA export from nucleus; GO:0009910,negative regulation of flower development; GO:0033234,negative regulation of protein sumoylation; GO:0016973,poly(A)+ mRNA export from nucleus; G…	--	--	--	--
Cluster-100064.16	347	K09291 nucleoprotein TPR | (RefSeq) nuclear-pore anchor (A)	ko03013: Nucleocytoplasmic transport	uncharacterized protein A4U43_C03F32060 [Asparagus officinalis]	--	A0A5P1FIQ1_ASPOF RecName: Full=TPR_MLP1_2 domain-containing protein {ECO:0000259|Pfam:PF07926};	--	--	--	--	--	--
Cluster-100064.17	237	K09291 nucleoprotein TPR | (RefSeq) nuclear-pore anchor (A)	ko03013: Nucleocytoplasmic transport	uncharacterized protein A4U43_C03F32060 [Asparagus officinalis]	--	A0A5P1FIQ1_ASPOF RecName: Full=TPR_MLP1_2 domain-containing protein {ECO:0000259|Pfam:PF07926};	--	--	--	--	--	--
Cluster-100064.18	226	K09291 nucleoprotein TPR | (RefSeq) nuclear-pore anchor (A)	ko03013: Nucleocytoplasmic transport	uncharacterized protein A4U43_C03F32060 [Asparagus officinalis]	--	A0A5P1FIQ1_ASPOF RecName: Full=TPR_MLP1_2 domain-containing protein {ECO:0000259|Pfam:PF07926};	--	--	--	--	--	--
Cluster-100064.2	430	K09291 nucleoprotein TPR | (RefSeq) nuclear-pore anchor (A)	ko03013: Nucleocytoplasmic transport	uncharacterized protein A4U43_C03F32060 [Asparagus officinalis]	--	A0A5P1FIQ1_ASPOF RecName: Full=TPR_MLP1_2 domain-containing protein {ECO:0000259|Pfam:PF07926};	--	--	--	--	--	--
Cluster-100064.3	627	K09291 nucleoprotein TPR | (RefSeq) nuclear-pore anchor (A)	ko03013: Nucleocytoplasmic transport	uncharacterized protein A4U43_C03F32060 [Asparagus officinalis]	NUA_ARATH RecName: Full=Nuclear-pore anchor {ECO:0000303|PubMed:17513499, ECO:0000303|PubMed:21189294}; AltName: Full=Protein TRANSLOCATED PROMOTER REGION {ECO:0000303|PubMed:17535820}; Short=AtTPR;	A0A5P1FIQ1_ASPOF RecName: Full=TPR_MLP1_2 domain-containing protein {ECO:0000259|Pfam:PF07926};	Uncharacterized conserved coiled-coil protein	GO:0005739,mitochondrion; GO:0005635,nuclear envelope; GO:0031965,nuclear membrane; GO:0005643,nuclear pore; GO:0005730,nucleolus; GO:0009506,plasmodesma; GO:0017056,structural constituent of nuclear pore; GO:0006406,mRNA export from nucleus; GO:0009910,negative regulation of flower development; GO:0033234,negative regulation of protein sumoylation; GO:0016973,poly(A)+ mRNA export from nucleus; G…	TPR/MLP1/MLP2-like protein	--	--	--
Cluster-100064.4	1890	K09291 nucleoprotein TPR | (RefSeq) nuclear-pore anchor (A)	ko03013: Nucleocytoplasmic transport	uncharacterized protein A4U43_C03F32060 [Asparagus officinalis]	NUA_ARATH RecName: Full=Nuclear-pore anchor {ECO:0000303|PubMed:17513499, ECO:0000303|PubMed:21189294}; AltName: Full=Protein TRANSLOCATED PROMOTER REGION {ECO:0000303|PubMed:17535820}; Short=AtTPR;	A0A5P1FIQ1_ASPOF RecName: Full=TPR_MLP1_2 domain-containing protein {ECO:0000259|Pfam:PF07926};	Uncharacterized conserved coiled-coil protein	GO:0005739,mitochondrion; GO:0005635,nuclear envelope; GO:0031965,nuclear membrane; GO:0005643,nuclear pore; GO:0005730,nucleolus; GO:0009506,plasmodesma; GO:0017056,structural constituent of nuclear pore; GO:0006406,mRNA export from nucleus; GO:0009910,negative regulation of flower development; GO:0033234,negative regulation of protein sumoylation; GO:0016973,poly(A)+ mRNA export from nucleus; G…	TPR/MLP1/MLP2-like protein	--	--	--
Cluster-100064.5	4552	K09291 nucleoprotein TPR | (RefSeq) nuclear-pore anchor (A)	ko03013: Nucleocytoplasmic transport	nuclear-pore anchor [Asparagus officinalis]	NUA_ARATH RecName: Full=Nuclear-pore anchor {ECO:0000303|PubMed:17513499, ECO:0000303|PubMed:21189294}; AltName: Full=Protein TRANSLOCATED PROMOTER REGION {ECO:0000303|PubMed:17535820}; Short=AtTPR;	A0A5P1FIQ1_ASPOF RecName: Full=TPR_MLP1_2 domain-containing protein {ECO:0000259|Pfam:PF07926};	Uncharacterized conserved coiled-coil protein	GO:0005739,mitochondrion; GO:0005635,nuclear envelope; GO:0031965,nuclear membrane; GO:0005643,nuclear pore; GO:0005730,nucleolus; GO:0009506,plasmodesma; GO:0017056,structural constituent of nuclear pore; GO:0006406,mRNA export from nucleus; GO:0009910,negative regulation of flower development; GO:0033234,negative regulation of protein sumoylation; GO:0016973,poly(A)+ mRNA export from nucleus; G…	TPR/MLP1/MLP2-like protein	--	--	--
Cluster-100064.6	4430	K09291 nucleoprotein TPR | (RefSeq) nuclear-pore anchor (A)	ko03013: Nucleocytoplasmic transport	nuclear-pore anchor [Asparagus officinalis]	NUA_ARATH RecName: Full=Nuclear-pore anchor {ECO:0000303|PubMed:17513499, ECO:0000303|PubMed:21189294}; AltName: Full=Protein TRANSLOCATED PROMOTER REGION {ECO:0000303|PubMed:17535820}; Short=AtTPR;	A0A5P1FIQ1_ASPOF RecName: Full=TPR_MLP1_2 domain-containing protein {ECO:0000259|Pfam:PF07926};	Uncharacterized conserved coiled-coil protein	GO:0005739,mitochondrion; GO:0005635,nuclear envelope; GO:0031965,nuclear membrane; GO:0005643,nuclear pore; GO:0005730,nucleolus; GO:0009506,plasmodesma; GO:0017056,structural constituent of nuclear pore; GO:0006406,mRNA export from nucleus; GO:0009910,negative regulation of flower development; GO:0033234,negative regulation of protein sumoylation; GO:0016973,poly(A)+ mRNA export from nucleus; G…	TPR/MLP1/MLP2-like protein	--	--	--
Cluster-100064.7	4552	K09291 nucleoprotein TPR | (RefSeq) nuclear-pore anchor (A)	ko03013: Nucleocytoplasmic transport	nuclear-pore anchor [Asparagus officinalis]	NUA_ARATH RecName: Full=Nuclear-pore anchor {ECO:0000303|PubMed:17513499, ECO:0000303|PubMed:21189294}; AltName: Full=Protein TRANSLOCATED PROMOTER REGION {ECO:0000303|PubMed:17535820}; Short=AtTPR;	A0A5P1FIQ1_ASPOF RecName: Full=TPR_MLP1_2 domain-containing protein {ECO:0000259|Pfam:PF07926};	Uncharacterized conserved coiled-coil protein	GO:0005739,mitochondrion; GO:0005635,nuclear envelope; GO:0031965,nuclear membrane; GO:0005643,nuclear pore; GO:0005730,nucleolus; GO:0009506,plasmodesma; GO:0017056,structural constituent of nuclear pore; GO:0006406,mRNA export from nucleus; GO:0009910,negative regulation of flower development; GO:0033234,negative regulation of protein sumoylation; GO:0016973,poly(A)+ mRNA export from nucleus; G…	TPR/MLP1/MLP2-like protein	--	--	--
Cluster-100064.8	231	K09291 nucleoprotein TPR | (RefSeq) nuclear-pore anchor (A)	ko03013: Nucleocytoplasmic transport	uncharacterized protein A4U43_C03F32060 [Asparagus officinalis]	--	A0A5P1FIQ1_ASPOF RecName: Full=TPR_MLP1_2 domain-containing protein {ECO:0000259|Pfam:PF07926};	--	--	--	--	--	--
Cluster-100064.9	4430	K09291 nucleoprotein TPR | (RefSeq) nuclear-pore anchor (A)	ko03013: Nucleocytoplasmic transport	nuclear-pore anchor [Asparagus officinalis]	NUA_ARATH RecName: Full=Nuclear-pore anchor {ECO:0000303|PubMed:17513499, ECO:0000303|PubMed:21189294}; AltName: Full=Protein TRANSLOCATED PROMOTER REGION {ECO:0000303|PubMed:17535820}; Short=AtTPR;	A0A5P1FIQ1_ASPOF RecName: Full=TPR_MLP1_2 domain-containing protein {ECO:0000259|Pfam:PF07926};	Uncharacterized conserved coiled-coil protein	GO:0005739,mitochondrion; GO:0005635,nuclear envelope; GO:0031965,nuclear membrane; GO:0005643,nuclear pore; GO:0005730,nucleolus; GO:0009506,plasmodesma; GO:0017056,structural constituent of nuclear pore; GO:0006406,mRNA export from nucleus; GO:0009910,negative regulation of flower development; GO:0033234,negative regulation of protein sumoylation; GO:0016973,poly(A)+ mRNA export from nucleus; G…	TPR/MLP1/MLP2-like protein	--	--	--
Cluster-100065.0	689	--	--	uncharacterized protein LOC103703824 [Phoenix dactylifera]	--	A0A8B9AAM7_PHODC SubName: Full=uncharacterized protein LOC103703824 {ECO:0000313|RefSeq:XP_008785053.1, ECO:0000313|RefSeq:XP_038982772.1};	--	--	Complex 1 protein (LYR family)	--	--	--
Cluster-100065.1	679	--	--	uncharacterized protein LOC103703824 [Phoenix dactylifera]	--	A0A8B9AAM7_PHODC SubName: Full=uncharacterized protein LOC103703824 {ECO:0000313|RefSeq:XP_008785053.1, ECO:0000313|RefSeq:XP_038982772.1};	--	--	Complex 1 protein (LYR family)	--	--	--
Cluster-100065.2	679	--	--	uncharacterized protein LOC103703824 [Phoenix dactylifera]	--	A0A8B9AAM7_PHODC SubName: Full=uncharacterized protein LOC103703824 {ECO:0000313|RefSeq:XP_008785053.1, ECO:0000313|RefSeq:XP_038982772.1};	--	--	Complex 1 protein (LYR family)	--	--	--
Cluster-100065.3	688	--	--	uncharacterized protein LOC103703824 [Phoenix dactylifera]	--	A0A8B9AAM7_PHODC SubName: Full=uncharacterized protein LOC103703824 {ECO:0000313|RefSeq:XP_008785053.1, ECO:0000313|RefSeq:XP_038982772.1};	--	--	Complex 1 protein (LYR family)	--	--	--
Cluster-100065.4	680	--	--	uncharacterized protein LOC103703824 [Phoenix dactylifera]	--	A0A8B9AAM7_PHODC SubName: Full=uncharacterized protein LOC103703824 {ECO:0000313|RefSeq:XP_008785053.1, ECO:0000313|RefSeq:XP_038982772.1};	--	--	Complex 1 protein (LYR family)	--	--	--
Cluster-100066.0	896	--	--	--	--	--	--	--	--	--	--	--
Cluster-100067.0	373	--	--	--	--	--	--	--	--	--	--	--
Cluster-100068.0	1107	--	--	uncharacterized protein LOC109846105 isoform X1 [Asparagus officinalis]	--	A0A835S6G0_VANPL SubName: Full=Uncharacterized protein {ECO:0000313|EMBL:KAG0498372.1};	MOT2 transcription factor	--	--	--	--	--
Cluster-100068.1	1143	K10643 CCR4-NOT transcription complex subunit 4 [EC:2.3.2.27] | (RefSeq) uncharacterized protein LOC102710340 (A)	ko03018: RNA degradation	uncharacterized protein A4U43_C05F31700 [Asparagus officinalis]	--	A0A5P1F1D2_ASPOF RecName: Full=RING-type domain-containing protein {ECO:0000259|PROSITE:PS50089};	MOT2 transcription factor	--	RING/Ubox like zinc-binding domain	--	--	--
Cluster-100068.2	729	--	--	uncharacterized protein LOC109841049 isoform X4 [Asparagus officinalis]	--	A0A2I0VF88_9ASPA SubName: Full=CCR4-NOT transcription complex subunit 4 {ECO:0000313|EMBL:PKU62024.1};	MOT2 transcription factor	--	--	--	--	--
Cluster-100068.3	638	--	--	uncharacterized protein LOC109846105 isoform X1 [Asparagus officinalis]	--	A0A2I0A5K8_9ASPA SubName: Full=CCR4-NOT transcription complex subunit 4 {ECO:0000313|EMBL:PKA50823.1};	MOT2 transcription factor	--	--	--	--	--
Cluster-100068.4	636	--	--	uncharacterized protein LOC109846105 isoform X1 [Asparagus officinalis]	--	A0A2I0A5K8_9ASPA SubName: Full=CCR4-NOT transcription complex subunit 4 {ECO:0000313|EMBL:PKA50823.1};	MOT2 transcription factor	--	--	--	--	--
Cluster-100068.5	621	--	--	uncharacterized protein LOC109846105 isoform X1 [Asparagus officinalis]	--	A0A2I0A5K8_9ASPA SubName: Full=CCR4-NOT transcription complex subunit 4 {ECO:0000313|EMBL:PKA50823.1};	MOT2 transcription factor	--	Unstructured region on Polyhomeotic-like protein 1 and 2	--	--	--
Cluster-100068.6	1370	K10643 CCR4-NOT transcription complex subunit 4 [EC:2.3.2.27] | (RefSeq) uncharacterized protein LOC111212893 (A)	ko03018: RNA degradation	uncharacterized protein LOC109841049 isoform X4 [Asparagus officinalis]	--	A0A5P1F1D2_ASPOF RecName: Full=RING-type domain-containing protein {ECO:0000259|PROSITE:PS50089};	MOT2 transcription factor	--	RING/Ubox like zinc-binding domain	--	--	--
Cluster-100068.7	652	--	--	uncharacterized protein LOC109846105 isoform X1 [Asparagus officinalis]	--	A0A2I0A5K8_9ASPA SubName: Full=CCR4-NOT transcription complex subunit 4 {ECO:0000313|EMBL:PKA50823.1};	MOT2 transcription factor	--	Unstructured region on Polyhomeotic-like protein 1 and 2	--	--	--
Cluster-100068.8	1557	K10643 CCR4-NOT transcription complex subunit 4 [EC:2.3.2.27] | (RefSeq) uncharacterized protein LOC102710340 (A)	ko03018: RNA degradation	uncharacterized protein LOC109841049 isoform X4 [Asparagus officinalis]	--	A0A5P1F1D2_ASPOF RecName: Full=RING-type domain-containing protein {ECO:0000259|PROSITE:PS50089};	MOT2 transcription factor	--	RING/Ubox like zinc-binding domain	--	--	--
Cluster-100069.0	741	--	--	--	--	--	--	--	--	--	--	--
Cluster-10007.0	398	--	--	--	--	--	--	--	--	--	--	--
Cluster-100070.0	2343	K22804 structural maintenance of chromosomes protein 6 | (RefSeq) structural maintenance of chromosomes protein 6B-like (A)	--	hypothetical protein RHMOL_Rhmol03G0126400 [Rhododendron molle]	RNHX1_ARATH RecName: Full=Putative ribonuclease H protein At1g65750; EC=3.1.26.4;	A0A8B8ZJ89_PHODC SubName: Full=uncharacterized protein LOC120105653 {ECO:0000313|RefSeq:XP_038974250.1};	FOG: Reverse transcriptase	GO:0046872,metal ion binding; GO:0003676,nucleic acid binding; GO:0004523,RNA-DNA hybrid ribonuclease activity; GO:0003674,molecular_function; GO:0005488,binding; GO:0043167,ion binding; GO:0043169,cation binding; GO:0097159,organic cyclic compound binding; GO:1901363,heterocyclic compound binding; GO:0003824,catalytic activity; GO:0004518,nuclease activity; GO:0004519,endonuclease activity; GO:0…	Reverse transcriptase-like	--	--	--
Cluster-100071.0	317	--	--	--	--	--	--	--	--	--	--	--
Cluster-100072.0	3059	--	--	--	--	--	--	--	--	--	--	--
Cluster-100072.1	2690	--	--	--	--	--	--	--	--	--	--	--
Cluster-100072.10	1256	--	--	--	--	--	--	--	--	--	--	--
Cluster-100072.11	1438	--	--	--	--	--	--	--	--	--	--	--
Cluster-100072.2	2123	--	--	--	--	--	--	--	--	--	--	--
Cluster-100072.3	3139	--	--	--	--	--	--	--	--	--	--	--
Cluster-100072.4	2525	--	--	--	--	--	--	--	--	--	--	--
Cluster-100072.5	2458	--	--	--	--	--	--	--	--	--	--	--
Cluster-100072.6	3121	--	--	--	--	--	--	--	--	--	--	--
Cluster-100072.7	1603	--	--	--	--	--	--	--	--	--	--	--
Cluster-100072.8	640	--	--	--	--	--	--	--	--	--	--	--
Cluster-100072.9	1227	--	--	--	--	--	--	--	--	--	--	--
Cluster-100073.0	1095	K14801 pre-rRNA-processing protein TSR4 | (RefSeq) programmed cell death protein 2 (A)	--	programmed cell death protein 2 [Cocos nucifera]	--	A0A8K0IG91_COCNU SubName: Full=Programmed cell death protein 2 {ECO:0000313|EMBL:KAG1354902.1};	Uncharacterized MYND Zn-finger protein	--	--	--	--	--
Cluster-100073.1	1506	K14801 pre-rRNA-processing protein TSR4 | (RefSeq) programmed cell death protein 2 (A)	--	programmed cell death protein 2 [Cocos nucifera]	--	A0A8K0IG91_COCNU SubName: Full=Programmed cell death protein 2 {ECO:0000313|EMBL:KAG1354902.1};	Uncharacterized MYND Zn-finger protein	--	--	--	--	--
Cluster-100073.2	825	K14801 pre-rRNA-processing protein TSR4 | (RefSeq) programmed cell death protein 2 (A)	--	programmed cell death protein 2 [Cocos nucifera]	--	A0A8K0IG91_COCNU SubName: Full=Programmed cell death protein 2 {ECO:0000313|EMBL:KAG1354902.1};	Uncharacterized MYND Zn-finger protein	--	--	--	--	--
Cluster-100073.3	1505	K14801 pre-rRNA-processing protein TSR4 | (RefSeq) programmed cell death protein 2 (A)	--	programmed cell death protein 2 [Cocos nucifera]	--	A0A8K0IG91_COCNU SubName: Full=Programmed cell death protein 2 {ECO:0000313|EMBL:KAG1354902.1};	Uncharacterized MYND Zn-finger protein	--	--	--	--	--
Cluster-100073.4	723	K14801 pre-rRNA-processing protein TSR4 | (RefSeq) programmed cell death protein 2 (A)	--	programmed cell death protein 2 [Cocos nucifera]	--	A0A8K0IG91_COCNU SubName: Full=Programmed cell death protein 2 {ECO:0000313|EMBL:KAG1354902.1};	Uncharacterized MYND Zn-finger protein	--	--	--	--	--
Cluster-100074.0	468	K24725 angio-associated migratory cell protein | (RefSeq) angio-associated migratory cell protein (A)	--	unnamed protein product [Ananas comosus var. bracteatus]	--	A0A6V7NN59_ANACO SubName: Full=Uncharacterized protein {ECO:0000313|EMBL:CAD1820030.1};	Angio-associated migratory cell protein (contains WD40 repeats)	--	--	--	--	--
Cluster-100074.1	2247	K24725 angio-associated migratory cell protein | (RefSeq) angio-associated migratory cell protein (A)	--	hypothetical protein AMTR_s00133p00094810 [Amborella trichopoda]	BOP1_ORYSJ RecName: Full=Ribosome biogenesis protein BOP1 homolog {ECO:0000255|HAMAP-Rule:MF_03027};	A0A5B6Z278_DAVIN SubName: Full=Putative angio-associated migratory cell protein {ECO:0000313|EMBL:MPA38164.1};	Angio-associated migratory cell protein (contains WD40 repeats)	GO:0005654,nucleoplasm; GO:0070545,PeBoW complex; GO:0030687,preribosome, large subunit precursor; GO:0043021,ribonucleoprotein complex binding; GO:0007276,gamete generation; GO:0000466,maturation of 5.8S rRNA from tricistronic rRNA transcript (SSU-rRNA, 5.8S rRNA, LSU-rRNA); GO:0000463,maturation of LSU-rRNA from tricistronic rRNA transcript (SSU-rRNA, 5.8S rRNA, LSU-rRNA); GO:0051302,regulation…	WD domain, G-beta repeat	--	--	--
Cluster-100074.2	1698	K24725 angio-associated migratory cell protein | (RefSeq) angio-associated migratory cell protein (A)	--	hypothetical protein F0562_013105 [Nyssa sinensis]	GBLPB_ORYSJ RecName: Full=Guanine nucleotide-binding protein subunit beta-like protein B; Short=GPB-LR; AltName: Full=Receptor for activated C kinase 1B;	A0A5B6Z278_DAVIN SubName: Full=Putative angio-associated migratory cell protein {ECO:0000313|EMBL:MPA38164.1};	Angio-associated migratory cell protein (contains WD40 repeats)	GO:0005829,cytosol; GO:0005634,nucleus; GO:0015935,small ribosomal subunit; GO:0005080,protein kinase C binding; GO:0043022,ribosome binding; GO:0001934,positive regulation of protein phosphorylation; GO:0072344,rescue of stalled ribosome; GO:0007165,signal transduction; GO:0003674,molecular_function; GO:0005488,binding; GO:0005515,protein binding; GO:0019899,enzyme binding; GO:0019900,kinase bin…	WD domain, G-beta repeat	--	--	--
Cluster-100074.3	500	K24725 angio-associated migratory cell protein | (RefSeq) angio-associated migratory cell protein (A)	--	hypothetical protein BHE74_00009204 [Ensete ventricosum]	PWP2_ARATH RecName: Full=Periodic tryptophan protein 2 {ECO:0000303|PubMed:19929880}; Short=AtPWP2 {ECO:0000303|PubMed:19929880, ECO:0000303|PubMed:23382868};	A0A444E1M0_ENSVE SubName: Full=Uncharacterized protein {ECO:0000313|EMBL:RWW04281.1};	Angio-associated migratory cell protein (contains WD40 repeats)	GO:0080008,Cul4-RING E3 ubiquitin ligase complex; GO:0005730,nucleolus; GO:0005634,nucleus; GO:0034388,Pwp2p-containing subcomplex of 90S preribosome; GO:0032040,small-subunit processome; GO:0009553,embryo sac development; GO:0000462,maturation of SSU-rRNA from tricistronic rRNA transcript (SSU-rRNA, 5.8S rRNA, LSU-rRNA); GO:0010119,regulation of stomatal movement; GO:0009744,response to sucrose;…	--	--	--	--
Cluster-100074.4	400	--	--	--	--	--	--	--	--	--	--	--
Cluster-100075.0	294	--	--	--	--	--	--	--	--	--	--	--
Cluster-100076.0	1748	--	--	--	--	--	--	--	--	--	--	--
Cluster-100077.0	503	K04421 mitogen-activated protein kinase kinase kinase 3 [EC:2.7.11.25] | (RefSeq) mitogen-activated protein kinase kinase kinase 3-like (A)	--	mitogen-activated protein kinase kinase kinase 3-like [Phoenix dactylifera]	--	A0A8B7CAL6_PHODC SubName: Full=mitogen-activated protein kinase kinase kinase 3-like {ECO:0000313|RefSeq:XP_008795232.1};	--	--	--	--	--	--
Cluster-100077.1	374	K04421 mitogen-activated protein kinase kinase kinase 3 [EC:2.7.11.25] | (RefSeq) mitogen-activated protein kinase kinase kinase 3-like (A)	--	mitogen-activated protein kinase kinase kinase 3-like [Phoenix dactylifera]	--	A0A8B7CAL6_PHODC SubName: Full=mitogen-activated protein kinase kinase kinase 3-like {ECO:0000313|RefSeq:XP_008795232.1};	--	--	--	--	--	--
Cluster-100077.2	539	K04421 mitogen-activated protein kinase kinase kinase 3 [EC:2.7.11.25] | (RefSeq) mitogen-activated protein kinase kinase kinase 3-like (A)	--	mitogen-activated protein kinase kinase kinase 3-like [Phoenix dactylifera]	--	A0A8B7CAL6_PHODC SubName: Full=mitogen-activated protein kinase kinase kinase 3-like {ECO:0000313|RefSeq:XP_008795232.1};	--	--	--	--	--	--
Cluster-100077.3	572	K04421 mitogen-activated protein kinase kinase kinase 3 [EC:2.7.11.25] | (RefSeq) mitogen-activated protein kinase kinase kinase 3-like (A)	--	mitogen-activated protein kinase kinase kinase 3-like [Phoenix dactylifera]	--	A0A8B7CAL6_PHODC SubName: Full=mitogen-activated protein kinase kinase kinase 3-like {ECO:0000313|RefSeq:XP_008795232.1};	--	--	--	--	--	--
Cluster-100078.0	595	--	--	--	--	--	--	--	--	--	--	--
Cluster-100079.0	612	K16569 gamma-tubulin complex component 2 | (RefSeq) gamma-tubulin complex component 2 (A)	--	hypothetical protein FCM35_KLT13829 [Carex littledalei]	--	A0A833VFK2_9POAL SubName: Full=Uncharacterized protein {ECO:0000313|EMBL:KAF3321613.1};	DRIM (Down-regulated in metastasis)-like proteins	--	--	--	--	--
Cluster-100079.1	526	K16569 gamma-tubulin complex component 2 | (RefSeq) gamma-tubulin complex component 2 (A)	--	uncharacterized protein LOC105060459 [Elaeis guineensis]	--	A0A6I9SEP1_ELAGV SubName: Full=uncharacterized protein LOC105060459 {ECO:0000313|RefSeq:XP_010942482.1};	DRIM (Down-regulated in metastasis)-like proteins	--	--	--	--	--
Cluster-100079.2	720	K16569 gamma-tubulin complex component 2 | (RefSeq) LOW QUALITY PROTEIN: gamma-tubulin complex component 2 (A)	--	uncharacterized protein LOC105060459 [Elaeis guineensis]	--	A0A6I9SEP1_ELAGV SubName: Full=uncharacterized protein LOC105060459 {ECO:0000313|RefSeq:XP_010942482.1};	DRIM (Down-regulated in metastasis)-like proteins	--	Protein of unknown function (DUF1068)	--	--	--
Cluster-100079.3	622	K16569 gamma-tubulin complex component 2 | (RefSeq) gamma-tubulin complex component 2 (A)	--	uncharacterized protein LOC105060459 [Elaeis guineensis]	--	A0A6I9SEP1_ELAGV SubName: Full=uncharacterized protein LOC105060459 {ECO:0000313|RefSeq:XP_010942482.1};	DRIM (Down-regulated in metastasis)-like proteins	--	--	--	--	--
Cluster-100079.4	618	K16569 gamma-tubulin complex component 2 | (RefSeq) gamma-tubulin complex component 2 (A)	--	hypothetical protein FCM35_KLT13829 [Carex littledalei]	--	A0A833VFK2_9POAL SubName: Full=Uncharacterized protein {ECO:0000313|EMBL:KAF3321613.1};	DRIM (Down-regulated in metastasis)-like proteins	--	--	--	--	--
Cluster-100079.5	623	K16569 gamma-tubulin complex component 2 | (RefSeq) gamma-tubulin complex component 2 (A)	--	uncharacterized protein LOC105060459 [Elaeis guineensis]	--	A0A6I9SEP1_ELAGV SubName: Full=uncharacterized protein LOC105060459 {ECO:0000313|RefSeq:XP_010942482.1};	DRIM (Down-regulated in metastasis)-like proteins	--	--	--	--	--
Cluster-100079.6	412	--	--	uncharacterized protein LOC109715175 [Ananas comosus]	--	A0A6P5FJ23_ANACO SubName: Full=uncharacterized protein LOC109715175 {ECO:0000313|RefSeq:XP_020095647.1};	DRIM (Down-regulated in metastasis)-like proteins	--	--	--	--	--
Cluster-10008.0	594	--	--	--	--	--	--	--	--	--	--	--
Cluster-100080.0	485	--	--	--	--	--	--	--	--	--	--	--
Cluster-100080.1	402	--	--	--	--	--	--	--	--	--	--	--
Cluster-100080.2	3858	--	--	--	--	--	--	--	--	--	--	--
Cluster-100080.3	418	--	--	--	--	--	--	--	--	--	--	--
Cluster-100081.0	870	--	--	--	--	--	--	--	--	--	--	--
Cluster-100082.0	1507	--	--	PI-PLC X domain-containing protein At5g67130 [Asparagus officinalis]	Y5713_ARATH RecName: Full=PI-PLC X domain-containing protein At5g67130; Flags: Precursor;	A0A5P1F0K5_ASPOF SubName: Full=Uncharacterized protein {ECO:0000313|EMBL:ONK70329.1};	--	GO:0046658,anchored component of plasma membrane; GO:0009536,plastid; GO:0008081,phosphoric diester hydrolase activity; GO:0006629,lipid metabolic process; GO:0003674,molecular_function; GO:0003824,catalytic activity; GO:0016787,hydrolase activity; GO:0016788,hydrolase activity, acting on ester bonds; GO:0042578,phosphoric ester hydrolase activity; GO:0008150,biological_process; GO:0008152,metabo…	Carbohydrate binding domain CBM49	--	--	--
Cluster-100083.0	852	--	--	--	--	--	--	--	--	--	--	--
Cluster-100083.1	852	--	--	--	--	--	--	--	--	--	--	--
Cluster-100083.2	980	--	--	--	--	--	--	--	--	--	--	--
Cluster-100083.3	798	--	--	--	--	--	--	--	--	--	--	--
Cluster-100084.0	299	--	--	uncharacterized protein LOC109819747 [Asparagus officinalis]	--	--	--	--	--	--	--	--
Cluster-100085.0	3279	--	--	uncharacterized protein LOC109830651 [Asparagus officinalis]	--	A0A5P1FLR5_ASPOF SubName: Full=Uncharacterized protein {ECO:0000313|EMBL:ONK77899.1};	--	--	Domain of unknown function (DUF3444)	--	--	--
Cluster-100086.0	753	--	--	--	--	--	--	--	--	--	--	--
Cluster-100087.0	1116	--	--	--	--	--	--	--	--	--	--	--
Cluster-100088.0	827	K14486 auxin response factor | (RefSeq) auxin response factor 7-like (A)	ko04075: Plant hormone signal transduction	auxin response factor 7-like [Asparagus officinalis]	ARFG_ORYSJ RecName: Full=Auxin response factor 7;	A0A5P1FKB5_ASPOF RecName: Full=Auxin response factor {ECO:0000256|RuleBase:RU004561};	--	GO:0005634,nucleus; GO:0003677,DNA binding; GO:0009734,auxin-activated signaling pathway; GO:0006355,regulation of transcription, DNA-templated; GO:0003674,molecular_function; GO:0003676,nucleic acid binding; GO:0005488,binding; GO:0097159,organic cyclic compound binding; GO:1901363,heterocyclic compound binding; GO:0007154,cell communication; GO:0007165,signal transduction; GO:0008150,biological…	--	--	--	--
Cluster-100088.1	359	K14486 auxin response factor | (RefSeq) auxin response factor 7-like (A)	ko04075: Plant hormone signal transduction	auxin response factor 7-like [Asparagus officinalis]	ARFI_ORYSJ RecName: Full=Auxin response factor 9;	A0A5P1FKB5_ASPOF RecName: Full=Auxin response factor {ECO:0000256|RuleBase:RU004561};	--	GO:0005634,nucleus; GO:0003677,DNA binding; GO:0009734,auxin-activated signaling pathway; GO:0006355,regulation of transcription, DNA-templated; GO:0003674,molecular_function; GO:0003676,nucleic acid binding; GO:0005488,binding; GO:0097159,organic cyclic compound binding; GO:1901363,heterocyclic compound binding; GO:0007154,cell communication; GO:0007165,signal transduction; GO:0008150,biological…	--	--	--	--
Cluster-100088.10	270	--	--	--	--	--	--	--	--	--	--	--
Cluster-100088.11	335	K14486 auxin response factor | (RefSeq) LOW QUALITY PROTEIN: auxin response factor 7-like (A)	ko04075: Plant hormone signal transduction	LOW QUALITY PROTEIN: auxin response factor 7-like [Asparagus officinalis]	ARFG_ORYSJ RecName: Full=Auxin response factor 7;	A0A804KH64_MUSAM RecName: Full=Auxin-responsive protein {ECO:0000256|RuleBase:RU004549};	--	GO:0005634,nucleus; GO:0003677,DNA binding; GO:0009734,auxin-activated signaling pathway; GO:0006355,regulation of transcription, DNA-templated; GO:0003674,molecular_function; GO:0003676,nucleic acid binding; GO:0005488,binding; GO:0097159,organic cyclic compound binding; GO:1901363,heterocyclic compound binding; GO:0007154,cell communication; GO:0007165,signal transduction; GO:0008150,biological…	AUX/IAA family	AUX/IAA	TR	AUX/IAA
Cluster-100088.12	1389	K13096 splicing factor 4 | (RefSeq) SURP and G-patch domain-containing protein 1-like protein (A)	--	SURP and G-patch domain-containing protein 1-like protein [Apostasia shenzhenica]	SUGP1_ARATH RecName: Full=SURP and G-patch domain-containing protein 1-like protein; AltName: Full=Splicing factor 4-like protein; Short=SF4-like protein;	A0A2I0A716_9ASPA SubName: Full=SURP and G-patch domain-containing protein 1-like protein {ECO:0000313|EMBL:PKA51336.1};	Predicted RNA-binding protein, contains SWAP and G-patch domains	GO:0005654,nucleoplasm; GO:0003723,RNA binding; GO:0006397,mRNA processing; GO:0008380,RNA splicing; GO:0003674,molecular_function; GO:0003676,nucleic acid binding; GO:0005488,binding; GO:0097159,organic cyclic compound binding; GO:1901363,heterocyclic compound binding; GO:0006139,nucleobase-containing compound metabolic process; GO:0006396,RNA processing; GO:0006725,cellular aromatic compound me…	--	--	--	--
Cluster-100088.13	1789	K14486 auxin response factor | (RefSeq) LOW QUALITY PROTEIN: auxin response factor 7-like (A)	ko04075: Plant hormone signal transduction	LOW QUALITY PROTEIN: auxin response factor 7-like [Asparagus officinalis]	ARFG_ORYSJ RecName: Full=Auxin response factor 7;	A0A822Z654_NELNU RecName: Full=Auxin response factor {ECO:0000256|RuleBase:RU004561};	--	GO:0005634,nucleus; GO:0003677,DNA binding; GO:0009734,auxin-activated signaling pathway; GO:0006355,regulation of transcription, DNA-templated; GO:0003674,molecular_function; GO:0003676,nucleic acid binding; GO:0005488,binding; GO:0097159,organic cyclic compound binding; GO:1901363,heterocyclic compound binding; GO:0007154,cell communication; GO:0007165,signal transduction; GO:0008150,biological…	Auxin response factor	B3-ARF	TF	B3->B3-ARF
Cluster-100088.14	301	--	--	--	--	--	--	--	--	--	--	--
Cluster-100088.15	1201	K14486 auxin response factor | (RefSeq) LOW QUALITY PROTEIN: auxin response factor 7-like (A)	ko04075: Plant hormone signal transduction	LOW QUALITY PROTEIN: auxin response factor 7-like [Asparagus officinalis]	ARFA_ARATH RecName: Full=Auxin response factor 1 {ECO:0000303|PubMed:9188533};	A0A068TNZ7_COFCA RecName: Full=TF-B3 domain-containing protein {ECO:0000259|PROSITE:PS50863};	--	GO:0005737,cytoplasm; GO:0005634,nucleus; GO:0003677,DNA binding; GO:0003700,DNA-binding transcription factor activity; GO:0042802,identical protein binding; GO:0043565,sequence-specific DNA binding; GO:0009734,auxin-activated signaling pathway; GO:0008219,cell death; GO:0010150,leaf senescence; GO:0045892,negative regulation of transcription, DNA-templated; GO:0009733,response to auxin; GO:00036…	B3 DNA binding domain	B3	TF	B3->B3
Cluster-100088.16	227	K14486 auxin response factor | (RefSeq) auxin response factor 7-like isoform X1 (A)	ko04075: Plant hormone signal transduction	Auxin response factor 1 [Zea mays]	ARFI_ORYSJ RecName: Full=Auxin response factor 9;	A0A804NS82_MAIZE RecName: Full=Auxin response factor {ECO:0000256|RuleBase:RU004561};	--	GO:0005634,nucleus; GO:0003677,DNA binding; GO:0009734,auxin-activated signaling pathway; GO:0006355,regulation of transcription, DNA-templated; GO:0003674,molecular_function; GO:0003676,nucleic acid binding; GO:0005488,binding; GO:0097159,organic cyclic compound binding; GO:1901363,heterocyclic compound binding; GO:0007154,cell communication; GO:0007165,signal transduction; GO:0008150,biological…	--	--	--	--
Cluster-100088.17	1477	K14486 auxin response factor | (RefSeq) LOW QUALITY PROTEIN: auxin response factor 7-like (A)	ko04075: Plant hormone signal transduction	LOW QUALITY PROTEIN: auxin response factor 7-like [Asparagus officinalis]	ARFG_ORYSJ RecName: Full=Auxin response factor 7;	A0A822Z654_NELNU RecName: Full=Auxin response factor {ECO:0000256|RuleBase:RU004561};	--	GO:0005634,nucleus; GO:0003677,DNA binding; GO:0009734,auxin-activated signaling pathway; GO:0006355,regulation of transcription, DNA-templated; GO:0003674,molecular_function; GO:0003676,nucleic acid binding; GO:0005488,binding; GO:0097159,organic cyclic compound binding; GO:1901363,heterocyclic compound binding; GO:0007154,cell communication; GO:0007165,signal transduction; GO:0008150,biological…	Auxin response factor	B3-ARF	TF	B3->B3-ARF
Cluster-100088.18	1777	K14486 auxin response factor | (RefSeq) LOW QUALITY PROTEIN: auxin response factor 7-like (A)	ko04075: Plant hormone signal transduction	LOW QUALITY PROTEIN: auxin response factor 7-like [Asparagus officinalis]	ARFG_ORYSJ RecName: Full=Auxin response factor 7;	A0A822Z654_NELNU RecName: Full=Auxin response factor {ECO:0000256|RuleBase:RU004561};	--	GO:0005634,nucleus; GO:0003677,DNA binding; GO:0009734,auxin-activated signaling pathway; GO:0006355,regulation of transcription, DNA-templated; GO:0003674,molecular_function; GO:0003676,nucleic acid binding; GO:0005488,binding; GO:0097159,organic cyclic compound binding; GO:1901363,heterocyclic compound binding; GO:0007154,cell communication; GO:0007165,signal transduction; GO:0008150,biological…	Auxin response factor	B3-ARF	TF	B3->B3-ARF
Cluster-100088.19	1777	K14486 auxin response factor | (RefSeq) LOW QUALITY PROTEIN: auxin response factor 7-like (A)	ko04075: Plant hormone signal transduction	LOW QUALITY PROTEIN: auxin response factor 7-like [Asparagus officinalis]	ARFG_ORYSJ RecName: Full=Auxin response factor 7;	A0A5P1FKB5_ASPOF RecName: Full=Auxin response factor {ECO:0000256|RuleBase:RU004561};	--	GO:0005634,nucleus; GO:0003677,DNA binding; GO:0009734,auxin-activated signaling pathway; GO:0006355,regulation of transcription, DNA-templated; GO:0003674,molecular_function; GO:0003676,nucleic acid binding; GO:0005488,binding; GO:0097159,organic cyclic compound binding; GO:1901363,heterocyclic compound binding; GO:0007154,cell communication; GO:0007165,signal transduction; GO:0008150,biological…	Auxin response factor	B3-ARF	TF	B3->B3-ARF
Cluster-100088.2	2021	K14486 auxin response factor | (RefSeq) auxin response factor 7-like (A)	ko04075: Plant hormone signal transduction	auxin response factor 7-like [Asparagus officinalis]	ARFG_ORYSJ RecName: Full=Auxin response factor 7;	A0A5P1FKB5_ASPOF RecName: Full=Auxin response factor {ECO:0000256|RuleBase:RU004561};	--	GO:0005634,nucleus; GO:0003677,DNA binding; GO:0009734,auxin-activated signaling pathway; GO:0006355,regulation of transcription, DNA-templated; GO:0003674,molecular_function; GO:0003676,nucleic acid binding; GO:0005488,binding; GO:0097159,organic cyclic compound binding; GO:1901363,heterocyclic compound binding; GO:0007154,cell communication; GO:0007165,signal transduction; GO:0008150,biological…	AUX/IAA family	--	--	--
Cluster-100088.20	353	K14486 auxin response factor | (RefSeq) LOW QUALITY PROTEIN: auxin response factor 7-like (A)	ko04075: Plant hormone signal transduction	LOW QUALITY PROTEIN: auxin response factor 7-like [Asparagus officinalis]	ARFA_ARATH RecName: Full=Auxin response factor 1 {ECO:0000303|PubMed:9188533};	A0A068TNZ7_COFCA RecName: Full=TF-B3 domain-containing protein {ECO:0000259|PROSITE:PS50863};	--	GO:0005737,cytoplasm; GO:0005634,nucleus; GO:0003677,DNA binding; GO:0003700,DNA-binding transcription factor activity; GO:0042802,identical protein binding; GO:0043565,sequence-specific DNA binding; GO:0009734,auxin-activated signaling pathway; GO:0008219,cell death; GO:0010150,leaf senescence; GO:0045892,negative regulation of transcription, DNA-templated; GO:0009733,response to auxin; GO:00036…	B3 DNA binding domain	B3	TF	B3->B3
Cluster-100088.21	264	--	--	--	--	--	--	--	--	--	--	--
Cluster-100088.22	1789	K14486 auxin response factor | (RefSeq) LOW QUALITY PROTEIN: auxin response factor 7-like (A)	ko04075: Plant hormone signal transduction	LOW QUALITY PROTEIN: auxin response factor 7-like [Asparagus officinalis]	ARFG_ORYSJ RecName: Full=Auxin response factor 7;	A0A5P1FKB5_ASPOF RecName: Full=Auxin response factor {ECO:0000256|RuleBase:RU004561};	--	GO:0005634,nucleus; GO:0003677,DNA binding; GO:0009734,auxin-activated signaling pathway; GO:0006355,regulation of transcription, DNA-templated; GO:0003674,molecular_function; GO:0003676,nucleic acid binding; GO:0005488,binding; GO:0097159,organic cyclic compound binding; GO:1901363,heterocyclic compound binding; GO:0007154,cell communication; GO:0007165,signal transduction; GO:0008150,biological…	Auxin response factor	B3-ARF	TF	B3->B3-ARF
Cluster-100088.23	934	K14486 auxin response factor | (RefSeq) LOW QUALITY PROTEIN: auxin response factor 7-like (A)	ko04075: Plant hormone signal transduction	LOW QUALITY PROTEIN: auxin response factor 7-like [Asparagus officinalis]	ARFG_ORYSJ RecName: Full=Auxin response factor 7;	A0A5P1FKB5_ASPOF RecName: Full=Auxin response factor {ECO:0000256|RuleBase:RU004561};	--	GO:0005634,nucleus; GO:0003677,DNA binding; GO:0009734,auxin-activated signaling pathway; GO:0006355,regulation of transcription, DNA-templated; GO:0003674,molecular_function; GO:0003676,nucleic acid binding; GO:0005488,binding; GO:0097159,organic cyclic compound binding; GO:1901363,heterocyclic compound binding; GO:0007154,cell communication; GO:0007165,signal transduction; GO:0008150,biological…	AUX/IAA family	AUX/IAA	TR	AUX/IAA
Cluster-100088.24	936	K14486 auxin response factor | (RefSeq) LOW QUALITY PROTEIN: auxin response factor 7-like (A)	ko04075: Plant hormone signal transduction	LOW QUALITY PROTEIN: auxin response factor 7-like [Asparagus officinalis]	ARFG_ORYSJ RecName: Full=Auxin response factor 7;	A0A5P1FKB5_ASPOF RecName: Full=Auxin response factor {ECO:0000256|RuleBase:RU004561};	--	GO:0005634,nucleus; GO:0003677,DNA binding; GO:0009734,auxin-activated signaling pathway; GO:0006355,regulation of transcription, DNA-templated; GO:0003674,molecular_function; GO:0003676,nucleic acid binding; GO:0005488,binding; GO:0097159,organic cyclic compound binding; GO:1901363,heterocyclic compound binding; GO:0007154,cell communication; GO:0007165,signal transduction; GO:0008150,biological…	AUX/IAA family	AUX/IAA	TR	AUX/IAA
Cluster-100088.25	938	K14486 auxin response factor | (RefSeq) LOW QUALITY PROTEIN: auxin response factor 7-like (A)	ko04075: Plant hormone signal transduction	LOW QUALITY PROTEIN: auxin response factor 7-like [Asparagus officinalis]	ARFG_ORYSJ RecName: Full=Auxin response factor 7;	A0A5P1FKB5_ASPOF RecName: Full=Auxin response factor {ECO:0000256|RuleBase:RU004561};	--	GO:0005634,nucleus; GO:0003677,DNA binding; GO:0009734,auxin-activated signaling pathway; GO:0006355,regulation of transcription, DNA-templated; GO:0003674,molecular_function; GO:0003676,nucleic acid binding; GO:0005488,binding; GO:0097159,organic cyclic compound binding; GO:1901363,heterocyclic compound binding; GO:0007154,cell communication; GO:0007165,signal transduction; GO:0008150,biological…	AUX/IAA family	AUX/IAA	TR	AUX/IAA
Cluster-100088.26	936	K14486 auxin response factor | (RefSeq) LOW QUALITY PROTEIN: auxin response factor 7-like (A)	ko04075: Plant hormone signal transduction	LOW QUALITY PROTEIN: auxin response factor 7-like [Asparagus officinalis]	ARFG_ORYSJ RecName: Full=Auxin response factor 7;	A0A5P1FKB5_ASPOF RecName: Full=Auxin response factor {ECO:0000256|RuleBase:RU004561};	--	GO:0005634,nucleus; GO:0003677,DNA binding; GO:0009734,auxin-activated signaling pathway; GO:0006355,regulation of transcription, DNA-templated; GO:0003674,molecular_function; GO:0003676,nucleic acid binding; GO:0005488,binding; GO:0097159,organic cyclic compound binding; GO:1901363,heterocyclic compound binding; GO:0007154,cell communication; GO:0007165,signal transduction; GO:0008150,biological…	AUX/IAA family	AUX/IAA	TR	AUX/IAA
Cluster-100088.27	502	K14486 auxin response factor | (RefSeq) LOW QUALITY PROTEIN: auxin response factor 7-like (A)	ko04075: Plant hormone signal transduction	PREDICTED: auxin response factor 7-like [Musa acuminata subsp. malaccensis]	ARFG_ORYSJ RecName: Full=Auxin response factor 7;	A0A804KH64_MUSAM RecName: Full=Auxin-responsive protein {ECO:0000256|RuleBase:RU004549};	--	GO:0005634,nucleus; GO:0003677,DNA binding; GO:0009734,auxin-activated signaling pathway; GO:0006355,regulation of transcription, DNA-templated; GO:0003674,molecular_function; GO:0003676,nucleic acid binding; GO:0005488,binding; GO:0097159,organic cyclic compound binding; GO:1901363,heterocyclic compound binding; GO:0007154,cell communication; GO:0007165,signal transduction; GO:0008150,biological…	--	--	--	--
Cluster-100088.28	511	K14486 auxin response factor | (RefSeq) LOW QUALITY PROTEIN: auxin response factor 7-like (A)	ko04075: Plant hormone signal transduction	--	--	--	--	--	--	--	--	--
Cluster-100088.29	562	K14486 auxin response factor | (RefSeq) LOW QUALITY PROTEIN: auxin response factor 7-like (A)	ko04075: Plant hormone signal transduction	PREDICTED: auxin response factor 7-like [Musa acuminata subsp. malaccensis]	ARFG_ORYSJ RecName: Full=Auxin response factor 7;	A0A804KH64_MUSAM RecName: Full=Auxin-responsive protein {ECO:0000256|RuleBase:RU004549};	--	GO:0005634,nucleus; GO:0003677,DNA binding; GO:0009734,auxin-activated signaling pathway; GO:0006355,regulation of transcription, DNA-templated; GO:0003674,molecular_function; GO:0003676,nucleic acid binding; GO:0005488,binding; GO:0097159,organic cyclic compound binding; GO:1901363,heterocyclic compound binding; GO:0007154,cell communication; GO:0007165,signal transduction; GO:0008150,biological…	--	--	--	--
Cluster-100088.3	754	K14486 auxin response factor | (RefSeq) auxin response factor 7-like (A)	ko04075: Plant hormone signal transduction	auxin response factor 7-like [Asparagus officinalis]	ARFA_ARATH RecName: Full=Auxin response factor 1 {ECO:0000303|PubMed:9188533};	A0A5P1FKB5_ASPOF RecName: Full=Auxin response factor {ECO:0000256|RuleBase:RU004561};	--	GO:0005737,cytoplasm; GO:0005634,nucleus; GO:0003677,DNA binding; GO:0003700,DNA-binding transcription factor activity; GO:0042802,identical protein binding; GO:0043565,sequence-specific DNA binding; GO:0009734,auxin-activated signaling pathway; GO:0008219,cell death; GO:0010150,leaf senescence; GO:0045892,negative regulation of transcription, DNA-templated; GO:0009733,response to auxin; GO:00036…	AUX/IAA family	AUX/IAA	TR	AUX/IAA
Cluster-100088.4	1387	K14486 auxin response factor | (RefSeq) auxin response factor 7-like (A)	ko04075: Plant hormone signal transduction	auxin response factor 7-like [Asparagus officinalis]	ARFA_ARATH RecName: Full=Auxin response factor 1 {ECO:0000303|PubMed:9188533};	A0A5P1FKB5_ASPOF RecName: Full=Auxin response factor {ECO:0000256|RuleBase:RU004561};	--	GO:0005737,cytoplasm; GO:0005634,nucleus; GO:0003677,DNA binding; GO:0003700,DNA-binding transcription factor activity; GO:0042802,identical protein binding; GO:0043565,sequence-specific DNA binding; GO:0009734,auxin-activated signaling pathway; GO:0008219,cell death; GO:0010150,leaf senescence; GO:0045892,negative regulation of transcription, DNA-templated; GO:0009733,response to auxin; GO:00036…	AUX/IAA family	AUX/IAA	TR	AUX/IAA
Cluster-100088.5	2248	K14486 auxin response factor | (RefSeq) auxin response factor 7-like (A)	ko04075: Plant hormone signal transduction	auxin response factor 7-like [Asparagus officinalis]	ARFG_ORYSJ RecName: Full=Auxin response factor 7;	A0A5P1FKB5_ASPOF RecName: Full=Auxin response factor {ECO:0000256|RuleBase:RU004561};	--	GO:0005634,nucleus; GO:0003677,DNA binding; GO:0009734,auxin-activated signaling pathway; GO:0006355,regulation of transcription, DNA-templated; GO:0003674,molecular_function; GO:0003676,nucleic acid binding; GO:0005488,binding; GO:0097159,organic cyclic compound binding; GO:1901363,heterocyclic compound binding; GO:0007154,cell communication; GO:0007165,signal transduction; GO:0008150,biological…	AUX/IAA family	--	--	--
Cluster-100088.6	581	K14486 auxin response factor | (RefSeq) auxin response factor 7-like (A)	ko04075: Plant hormone signal transduction	auxin response factor 7-like [Asparagus officinalis]	ARFG_ORYSJ RecName: Full=Auxin response factor 7;	A0A5P1FKB5_ASPOF RecName: Full=Auxin response factor {ECO:0000256|RuleBase:RU004561};	--	GO:0005634,nucleus; GO:0003677,DNA binding; GO:0009734,auxin-activated signaling pathway; GO:0006355,regulation of transcription, DNA-templated; GO:0003674,molecular_function; GO:0003676,nucleic acid binding; GO:0005488,binding; GO:0097159,organic cyclic compound binding; GO:1901363,heterocyclic compound binding; GO:0007154,cell communication; GO:0007165,signal transduction; GO:0008150,biological…	--	--	--	--
Cluster-100088.7	1663	K14486 auxin response factor | (RefSeq) auxin response factor 7-like (A)	ko04075: Plant hormone signal transduction	auxin response factor 7-like [Asparagus officinalis]	ARFG_ORYSJ RecName: Full=Auxin response factor 7;	A0A5P1FKB5_ASPOF RecName: Full=Auxin response factor {ECO:0000256|RuleBase:RU004561};	--	GO:0005634,nucleus; GO:0003677,DNA binding; GO:0009734,auxin-activated signaling pathway; GO:0006355,regulation of transcription, DNA-templated; GO:0003674,molecular_function; GO:0003676,nucleic acid binding; GO:0005488,binding; GO:0097159,organic cyclic compound binding; GO:1901363,heterocyclic compound binding; GO:0007154,cell communication; GO:0007165,signal transduction; GO:0008150,biological…	AUX/IAA family	--	--	--
Cluster-100088.8	1174	K14486 auxin response factor | (RefSeq) auxin response factor 7-like (A)	ko04075: Plant hormone signal transduction	auxin response factor 7-like [Asparagus officinalis]	ARFA_ARATH RecName: Full=Auxin response factor 1 {ECO:0000303|PubMed:9188533};	A0A5P1FKB5_ASPOF RecName: Full=Auxin response factor {ECO:0000256|RuleBase:RU004561};	--	GO:0005737,cytoplasm; GO:0005634,nucleus; GO:0003677,DNA binding; GO:0003700,DNA-binding transcription factor activity; GO:0042802,identical protein binding; GO:0043565,sequence-specific DNA binding; GO:0009734,auxin-activated signaling pathway; GO:0008219,cell death; GO:0010150,leaf senescence; GO:0045892,negative regulation of transcription, DNA-templated; GO:0009733,response to auxin; GO:00036…	AUX/IAA family	AUX/IAA	TR	AUX/IAA
Cluster-100088.9	470	K14486 auxin response factor | (RefSeq) auxin response factor 7-like (A)	ko04075: Plant hormone signal transduction	auxin response factor 7-like [Asparagus officinalis]	ARFA_ARATH RecName: Full=Auxin response factor 1 {ECO:0000303|PubMed:9188533};	A0A5P1FKB5_ASPOF RecName: Full=Auxin response factor {ECO:0000256|RuleBase:RU004561};	--	GO:0005737,cytoplasm; GO:0005634,nucleus; GO:0003677,DNA binding; GO:0003700,DNA-binding transcription factor activity; GO:0042802,identical protein binding; GO:0043565,sequence-specific DNA binding; GO:0009734,auxin-activated signaling pathway; GO:0008219,cell death; GO:0010150,leaf senescence; GO:0045892,negative regulation of transcription, DNA-templated; GO:0009733,response to auxin; GO:00036…	AUX/IAA family	AUX/IAA	TR	AUX/IAA
Cluster-100089.0	634	--	--	--	--	--	--	--	--	--	--	--
Cluster-10009.0	567	--	--	--	--	--	--	--	--	--	--	--
Cluster-100090.0	1054	K09553 stress-induced-phosphoprotein 1 | (RefSeq) hsp70-Hsp90 organizing protein 2-like (A)	--	HSP70 [Agave sisalana]	HSOP3_ARATH RecName: Full=Hsp70-Hsp90 organizing protein 3; Short=AtHop3;	A0A5P1E4L3_ASPOF SubName: Full=Uncharacterized protein {ECO:0000313|EMBL:ONK55966.1};	Molecular co-chaperone STI1	GO:0005829,cytosol; GO:0005634,nucleus; GO:0030544,Hsp70 protein binding; GO:0051879,Hsp90 protein binding; GO:0070678,preprotein binding; GO:0051131,chaperone-mediated protein complex assembly; GO:0010286,heat acclimation; GO:0006457,protein folding; GO:0003674,molecular_function; GO:0005488,binding; GO:0005515,protein binding; GO:0031072,heat shock protein binding; GO:0008150,biological_process…	Tetratricopeptide repeat	--	--	--
Cluster-100090.1	848	K09553 stress-induced-phosphoprotein 1 | (RefSeq) hsp70-Hsp90 organizing protein 2-like (A)	--	HSP70 [Agave sisalana]	HSOP3_ARATH RecName: Full=Hsp70-Hsp90 organizing protein 3; Short=AtHop3;	A0A5P1E4L3_ASPOF SubName: Full=Uncharacterized protein {ECO:0000313|EMBL:ONK55966.1};	Molecular co-chaperone STI1	GO:0005829,cytosol; GO:0005634,nucleus; GO:0030544,Hsp70 protein binding; GO:0051879,Hsp90 protein binding; GO:0070678,preprotein binding; GO:0051131,chaperone-mediated protein complex assembly; GO:0010286,heat acclimation; GO:0006457,protein folding; GO:0003674,molecular_function; GO:0005488,binding; GO:0005515,protein binding; GO:0031072,heat shock protein binding; GO:0008150,biological_process…	STI1 domain	--	--	--
Cluster-100090.10	2620	K09553 stress-induced-phosphoprotein 1 | (RefSeq) uncharacterized LOC100272917 (A)	--	HSP70 [Agave sisalana]	HSOP2_ARATH RecName: Full=Hsp70-Hsp90 organizing protein 2; Short=AtHop2;	N1QUU6_AEGTA SubName: Full=Heat shock protein STI {ECO:0000313|EMBL:EMT13260.1, ECO:0000313|EnsemblPlants:EMT13260};	Molecular co-chaperone STI1	GO:0005829,cytosol; GO:0005634,nucleus; GO:0030544,Hsp70 protein binding; GO:0051879,Hsp90 protein binding; GO:0070678,preprotein binding; GO:0051131,chaperone-mediated protein complex assembly; GO:0006457,protein folding; GO:0046686,response to cadmium ion; GO:0003674,molecular_function; GO:0005488,binding; GO:0005515,protein binding; GO:0031072,heat shock protein binding; GO:0008150,biological_…	--	--	--	--
Cluster-100090.11	2611	K09553 stress-induced-phosphoprotein 1 | (RefSeq) uncharacterized LOC100272917 (A)	--	HSP70 [Agave sisalana]	HSOP2_ARATH RecName: Full=Hsp70-Hsp90 organizing protein 2; Short=AtHop2;	N1QUU6_AEGTA SubName: Full=Heat shock protein STI {ECO:0000313|EMBL:EMT13260.1, ECO:0000313|EnsemblPlants:EMT13260};	Molecular co-chaperone STI1	GO:0005829,cytosol; GO:0005634,nucleus; GO:0030544,Hsp70 protein binding; GO:0051879,Hsp90 protein binding; GO:0070678,preprotein binding; GO:0051131,chaperone-mediated protein complex assembly; GO:0006457,protein folding; GO:0046686,response to cadmium ion; GO:0003674,molecular_function; GO:0005488,binding; GO:0005515,protein binding; GO:0031072,heat shock protein binding; GO:0008150,biological_…	--	--	--	--
Cluster-100090.12	2667	K09553 stress-induced-phosphoprotein 1 | (RefSeq) uncharacterized LOC100272917 (A)	--	HSP70 [Agave sisalana]	HSOP2_ARATH RecName: Full=Hsp70-Hsp90 organizing protein 2; Short=AtHop2;	N1QUU6_AEGTA SubName: Full=Heat shock protein STI {ECO:0000313|EMBL:EMT13260.1, ECO:0000313|EnsemblPlants:EMT13260};	Molecular co-chaperone STI1	GO:0005829,cytosol; GO:0005634,nucleus; GO:0030544,Hsp70 protein binding; GO:0051879,Hsp90 protein binding; GO:0070678,preprotein binding; GO:0051131,chaperone-mediated protein complex assembly; GO:0006457,protein folding; GO:0046686,response to cadmium ion; GO:0003674,molecular_function; GO:0005488,binding; GO:0005515,protein binding; GO:0031072,heat shock protein binding; GO:0008150,biological_…	--	--	--	--
Cluster-100090.2	1875	K09553 stress-induced-phosphoprotein 1 | (RefSeq) hsp70-Hsp90 organizing protein 2-like (A)	--	hsp70-Hsp90 organizing protein 2-like [Asparagus officinalis]	HSOP3_ARATH RecName: Full=Hsp70-Hsp90 organizing protein 3; Short=AtHop3;	A0A5P1E4L3_ASPOF SubName: Full=Uncharacterized protein {ECO:0000313|EMBL:ONK55966.1};	Molecular co-chaperone STI1	GO:0005829,cytosol; GO:0005634,nucleus; GO:0030544,Hsp70 protein binding; GO:0051879,Hsp90 protein binding; GO:0070678,preprotein binding; GO:0051131,chaperone-mediated protein complex assembly; GO:0010286,heat acclimation; GO:0006457,protein folding; GO:0003674,molecular_function; GO:0005488,binding; GO:0005515,protein binding; GO:0031072,heat shock protein binding; GO:0008150,biological_process…	Tetratricopeptide repeat	--	--	--
Cluster-100090.3	1872	K09553 stress-induced-phosphoprotein 1 | (RefSeq) hsp70-Hsp90 organizing protein 2-like (A)	--	hsp70-Hsp90 organizing protein 2-like [Asparagus officinalis]	HSOP3_ARATH RecName: Full=Hsp70-Hsp90 organizing protein 3; Short=AtHop3;	A0A5P1E4L3_ASPOF SubName: Full=Uncharacterized protein {ECO:0000313|EMBL:ONK55966.1};	Molecular co-chaperone STI1	GO:0005829,cytosol; GO:0005634,nucleus; GO:0030544,Hsp70 protein binding; GO:0051879,Hsp90 protein binding; GO:0070678,preprotein binding; GO:0051131,chaperone-mediated protein complex assembly; GO:0010286,heat acclimation; GO:0006457,protein folding; GO:0003674,molecular_function; GO:0005488,binding; GO:0005515,protein binding; GO:0031072,heat shock protein binding; GO:0008150,biological_process…	Tetratricopeptide repeat	--	--	--
Cluster-100090.4	698	K09553 stress-induced-phosphoprotein 1 | (RefSeq) hsp70-Hsp90 organizing protein 2-like (A)	--	hsp70-Hsp90 organizing protein 2-like [Asparagus officinalis]	HSOP_WHEAT RecName: Full=Hsp70-Hsp90 organizing protein; Short=TaHop;	A0A5P1E4L3_ASPOF SubName: Full=Uncharacterized protein {ECO:0000313|EMBL:ONK55966.1};	Molecular co-chaperone STI1	GO:0005737,cytoplasm; GO:0005634,nucleus; GO:0030544,Hsp70 protein binding; GO:0051879,Hsp90 protein binding; GO:0070678,preprotein binding; GO:0051131,chaperone-mediated protein complex assembly; GO:0006457,protein folding; GO:0003674,molecular_function; GO:0005488,binding; GO:0005515,protein binding; GO:0031072,heat shock protein binding; GO:0008150,biological_process; GO:0009987,cellular proce…	Tetratricopeptide repeat	--	--	--
Cluster-100090.5	279	K09553 stress-induced-phosphoprotein 1 | (RefSeq) hsp70-Hsp90 organizing protein 2-like (A)	--	HSP70 [Agave sisalana]	HSOP_WHEAT RecName: Full=Hsp70-Hsp90 organizing protein; Short=TaHop;	A0A6A6MKV5_HEVBR RecName: Full=STI1 domain-containing protein {ECO:0000259|SMART:SM00727};	Molecular co-chaperone STI1	GO:0005737,cytoplasm; GO:0005634,nucleus; GO:0030544,Hsp70 protein binding; GO:0051879,Hsp90 protein binding; GO:0070678,preprotein binding; GO:0051131,chaperone-mediated protein complex assembly; GO:0006457,protein folding; GO:0003674,molecular_function; GO:0005488,binding; GO:0005515,protein binding; GO:0031072,heat shock protein binding; GO:0008150,biological_process; GO:0009987,cellular proce…	--	--	--	--
Cluster-100090.6	335	K09553 stress-induced-phosphoprotein 1 | (RefSeq) hsp70-Hsp90 organizing protein 2-like (A)	--	hsp70-Hsp90 organizing protein 2-like [Asparagus officinalis]	HSOP2_ARATH RecName: Full=Hsp70-Hsp90 organizing protein 2; Short=AtHop2;	A0A5P1E4L3_ASPOF SubName: Full=Uncharacterized protein {ECO:0000313|EMBL:ONK55966.1};	Molecular co-chaperone STI1	GO:0005829,cytosol; GO:0005634,nucleus; GO:0030544,Hsp70 protein binding; GO:0051879,Hsp90 protein binding; GO:0070678,preprotein binding; GO:0051131,chaperone-mediated protein complex assembly; GO:0006457,protein folding; GO:0046686,response to cadmium ion; GO:0003674,molecular_function; GO:0005488,binding; GO:0005515,protein binding; GO:0031072,heat shock protein binding; GO:0008150,biological_…	STI1 domain	--	--	--
Cluster-100090.7	2596	K09553 stress-induced-phosphoprotein 1 | (RefSeq) uncharacterized LOC100272917 (A)	--	HSP70 [Agave sisalana]	HSOP2_ARATH RecName: Full=Hsp70-Hsp90 organizing protein 2; Short=AtHop2;	N1QUU6_AEGTA SubName: Full=Heat shock protein STI {ECO:0000313|EMBL:EMT13260.1, ECO:0000313|EnsemblPlants:EMT13260};	Molecular co-chaperone STI1	GO:0005829,cytosol; GO:0005634,nucleus; GO:0030544,Hsp70 protein binding; GO:0051879,Hsp90 protein binding; GO:0070678,preprotein binding; GO:0051131,chaperone-mediated protein complex assembly; GO:0006457,protein folding; GO:0046686,response to cadmium ion; GO:0003674,molecular_function; GO:0005488,binding; GO:0005515,protein binding; GO:0031072,heat shock protein binding; GO:0008150,biological_…	--	--	--	--
Cluster-100090.8	2676	K09553 stress-induced-phosphoprotein 1 | (RefSeq) uncharacterized LOC100272917 (A)	--	HSP70 [Agave sisalana]	HSOP2_ARATH RecName: Full=Hsp70-Hsp90 organizing protein 2; Short=AtHop2;	N1QUU6_AEGTA SubName: Full=Heat shock protein STI {ECO:0000313|EMBL:EMT13260.1, ECO:0000313|EnsemblPlants:EMT13260};	Molecular co-chaperone STI1	GO:0005829,cytosol; GO:0005634,nucleus; GO:0030544,Hsp70 protein binding; GO:0051879,Hsp90 protein binding; GO:0070678,preprotein binding; GO:0051131,chaperone-mediated protein complex assembly; GO:0006457,protein folding; GO:0046686,response to cadmium ion; GO:0003674,molecular_function; GO:0005488,binding; GO:0005515,protein binding; GO:0031072,heat shock protein binding; GO:0008150,biological_…	--	--	--	--
Cluster-100090.9	2612	K09553 stress-induced-phosphoprotein 1 | (RefSeq) uncharacterized LOC100272917 (A)	--	HSP70 [Agave sisalana]	HSOP2_ARATH RecName: Full=Hsp70-Hsp90 organizing protein 2; Short=AtHop2;	N1QUU6_AEGTA SubName: Full=Heat shock protein STI {ECO:0000313|EMBL:EMT13260.1, ECO:0000313|EnsemblPlants:EMT13260};	Molecular co-chaperone STI1	GO:0005829,cytosol; GO:0005634,nucleus; GO:0030544,Hsp70 protein binding; GO:0051879,Hsp90 protein binding; GO:0070678,preprotein binding; GO:0051131,chaperone-mediated protein complex assembly; GO:0006457,protein folding; GO:0046686,response to cadmium ion; GO:0003674,molecular_function; GO:0005488,binding; GO:0005515,protein binding; GO:0031072,heat shock protein binding; GO:0008150,biological_…	--	--	--	--
Cluster-100091.0	1347	K11418 histone deacetylase 11 [EC:3.5.1.98] | (RefSeq) histone deacetylase 2 (A)	--	hypothetical protein F2P56_012202 [Juglans regia]	--	A0A5K1E2D0_9MAGN SubName: Full=Uncharacterized protein {ECO:0000313|EMBL:VVW45322.1}; Flags: Fragment;	--	--	--	--	--	--
Cluster-100091.1	1379	K11418 histone deacetylase 11 [EC:3.5.1.98] | (RefSeq) histone deacetylase 2 (A)	--	hypothetical protein F2P56_012202 [Juglans regia]	--	A0A5K1E2D0_9MAGN SubName: Full=Uncharacterized protein {ECO:0000313|EMBL:VVW45322.1}; Flags: Fragment;	--	--	--	--	--	--
Cluster-100092.0	382	--	--	--	--	--	--	--	--	--	--	--
Cluster-100093.0	2165	K08286 protein-serine/threonine kinase [EC:2.7.11.-] | (RefSeq) serine/threonine-protein kinase D6PKL1-like (A)	--	uncharacterized protein A4U43_C10F13230 [Asparagus officinalis]	G11A_ORYSJ RecName: Full=Protein kinase G11A; EC=2.7.11.1;	A0A5P1E2X2_ASPOF RecName: Full=Protein kinase domain-containing protein {ECO:0000259|PROSITE:PS50011};	Putative serine/threonine protein kinase	GO:0005737,cytoplasm; GO:0005634,nucleus; GO:0005886,plasma membrane; GO:0005524,ATP binding; GO:0106310,protein serine kinase activity; GO:0004674,protein serine/threonine kinase activity; GO:0006468,protein phosphorylation; GO:0000166,nucleotide binding; GO:0003674,molecular_function; GO:0005488,binding; GO:0017076,purine nucleotide binding; GO:0030554,adenyl nucleotide binding; GO:0032553,ribo…	Protein kinase domain	--	--	--
Cluster-100093.1	2275	K08286 protein-serine/threonine kinase [EC:2.7.11.-] | (RefSeq) serine/threonine-protein kinase D6PKL1-like (A)	--	uncharacterized protein A4U43_C10F13230 [Asparagus officinalis]	G11A_ORYSJ RecName: Full=Protein kinase G11A; EC=2.7.11.1;	A0A5P1E2X2_ASPOF RecName: Full=Protein kinase domain-containing protein {ECO:0000259|PROSITE:PS50011};	Putative serine/threonine protein kinase	GO:0005737,cytoplasm; GO:0005634,nucleus; GO:0005886,plasma membrane; GO:0005524,ATP binding; GO:0106310,protein serine kinase activity; GO:0004674,protein serine/threonine kinase activity; GO:0006468,protein phosphorylation; GO:0000166,nucleotide binding; GO:0003674,molecular_function; GO:0005488,binding; GO:0017076,purine nucleotide binding; GO:0030554,adenyl nucleotide binding; GO:0032553,ribo…	Protein kinase domain	--	--	--
Cluster-100094.0	597	K11593 eukaryotic translation initiation factor 2C | (RefSeq) protein argonaute 1A-like (A)	--	hypothetical protein Prudu_016087 [Prunus dulcis]	--	A0A4Y1RKI3_PRUDU RecName: Full=Integrase catalytic domain-containing protein {ECO:0000259|PROSITE:PS50994};	FOG: Transposon-encoded proteins with TYA, reverse transcriptase, integrase domains in various combinations	--	--	--	--	--
Cluster-100095.0	487	--	--	--	--	--	--	--	--	--	--	--
Cluster-100096.0	1039	--	--	--	--	--	--	--	--	--	--	--
Cluster-100097.0	894	K00760 hypoxanthine phosphoribosyltransferase [EC:2.4.2.8] | (RefSeq) uncharacterized protein LOC109827543 (A)	ko00230: Purine metabolism; ko01100: Metabolic pathways; ko01110: Biosynthesis of secondary metabolites; ko01232: Nucleotide metabolism	uncharacterized protein LOC109827543 [Asparagus officinalis]	--	A0A5P1FVM6_ASPOF RecName: Full=Hypoxanthine phosphoribosyltransferase {ECO:0000256|RuleBase:RU364099}; EC=2.4.2.8 {ECO:0000256|RuleBase:RU364099};	Hypoxanthine-guanine phosphoribosyltransferase	--	Phosphoribosyl transferase domain	--	--	--
Cluster-100098.0	2384	K01792 glucose-6-phosphate 1-epimerase [EC:5.1.3.15] | (RefSeq) putative glucose-6-phosphate 1-epimerase isoform X1 (A)	ko00010: Glycolysis / Gluconeogenesis; ko01100: Metabolic pathways; ko01110: Biosynthesis of secondary metabolites	putative glucose-6-phosphate 1-epimerase isoform X1 [Asparagus officinalis]	AAPC_CENCI RecName: Full=Putative glucose-6-phosphate 1-epimerase {ECO:0000250|UniProtKB:Q03161}; EC=5.1.3.15 {ECO:0000250|UniProtKB:Q03161}; AltName: Full=Putative D-hexose-6-phosphate mutarotase {ECO:0000250|UniProtKB:Q03161}; AltName: Full=Putative apospory-associated protein C;	A0A5P1EUU5_ASPOF RecName: Full=Glucose-6-phosphate 1-epimerase {ECO:0000256|ARBA:ARBA00012083, ECO:0000256|PIRNR:PIRNR016020}; EC=5.1.3.15 {ECO:0000256|ARBA:ARBA00012083, ECO:0000256|PIRNR:PIRNR016020};	Uncharacterized enzymes related to aldose 1-epimerase	GO:0030246,carbohydrate binding; GO:0047938,glucose-6-phosphate 1-epimerase activity; GO:0005975,carbohydrate metabolic process; GO:0003674,molecular_function; GO:0005488,binding; GO:0003824,catalytic activity; GO:0016853,isomerase activity; GO:0016854,racemase and epimerase activity; GO:0016857,racemase and epimerase activity, acting on carbohydrates and derivatives; GO:0008150,biological_proces…	Aldose 1-epimerase	--	--	--
Cluster-100098.1	834	--	--	--	--	--	--	--	--	--	--	--
Cluster-100098.2	1234	--	--	--	--	--	--	--	--	--	--	--
Cluster-100099.0	558	K16297 serine carboxypeptidase-like clade II [EC:3.4.16.-] | (RefSeq) serine carboxypeptidase 1-like isoform X1 (A)	--	hypothetical protein HPP92_015857 [Vanilla planifolia]	SCP26_ARATH RecName: Full=Serine carboxypeptidase-like 26; EC=3.4.16.-; Flags: Precursor;	A0A453HS00_AEGTS RecName: Full=Carboxypeptidase {ECO:0000256|RuleBase:RU361156}; EC=3.4.16.- {ECO:0000256|RuleBase:RU361156};	Serine carboxypeptidases (lysosomal cathepsin A)	GO:0005783,endoplasmic reticulum; GO:0005576,extracellular region; GO:0000325,plant-type vacuole; GO:0099503,secretory vesicle; GO:0005773,vacuole; GO:0004185,serine-type carboxypeptidase activity; GO:0006508,proteolysis; GO:0003674,molecular_function; GO:0003824,catalytic activity; GO:0004180,carboxypeptidase activity; GO:0008233,peptidase activity; GO:0008236,serine-type peptidase activity; GO:…	--	--	--	--
Cluster-1001.0	645	--	--	--	--	--	--	--	SUR7/PalI family	--	--	--
Cluster-10010.0	310	--	--	--	--	--	--	--	--	--	--	--
Cluster-100100.0	1433	--	--	--	--	--	--	--	--	--	--	--
Cluster-100101.0	1162	--	--	--	--	--	--	--	--	--	--	--
Cluster-100102.0	514	--	--	--	--	--	--	--	--	--	--	--
Cluster-100103.0	1533	--	--	--	--	--	--	--	--	--	--	--
Cluster-100104.0	3387	K19026 spatacsin | (RefSeq) uncharacterized LOC107760795 (A)	--	Transposon TX1 uncharacterized 149 kDa protein [Vitis vinifera]	--	A0A438K9I0_VITVI SubName: Full=Transposon TX1 uncharacterized 149 kDa protein {ECO:0000313|EMBL:RVX17860.1};	FOG: Reverse transcriptase	--	--	--	--	--
Cluster-100105.0	396	--	--	probable WRKY transcription factor 49 [Ananas comosus]	--	A0A6P5EXZ8_ANACO SubName: Full=probable WRKY transcription factor 49 {ECO:0000313|RefSeq:XP_020086058.1};	--	--	--	--	--	--
Cluster-100106.0	676	--	--	plasma membrane intrinsic polypeptide protein, partial [Narcissus pseudonarcissus]	--	Q8VWS6_NARPS SubName: Full=Plasma membrane intrinsic polypeptide protein {ECO:0000313|EMBL:AAL69384.1}; Flags: Fragment;	--	--	--	--	--	--
Cluster-100106.1	813	--	--	--	--	--	--	--	--	--	--	--
Cluster-100106.2	373	--	--	plasma membrane intrinsic polypeptide protein, partial [Narcissus pseudonarcissus]	--	Q8VWS6_NARPS SubName: Full=Plasma membrane intrinsic polypeptide protein {ECO:0000313|EMBL:AAL69384.1}; Flags: Fragment;	--	--	--	--	--	--
Cluster-100107.0	640	--	--	--	--	--	--	--	--	--	--	--
Cluster-100107.1	355	--	--	--	--	--	--	--	--	--	--	--
Cluster-100108.0	3806	K12397 AP-3 complex subunit beta | (RefSeq) AP3-complex subunit beta-A (A)	--	AP3-complex subunit beta-A [Asparagus officinalis]	AP3BA_ARATH RecName: Full=AP3-complex subunit beta-A; AltName: Full=Adaptor protein complex AP-3 subunit beta-A; AltName: Full=Adaptor-related protein complex 3 subunit beta-A; AltName: Full=Beta-3B-adaptin; AltName: Full=Clathrin assembly protein complex 3 beta-A large chain; AltName: Full=Protein-affected trafficking 2;	A0A5P1EUH1_ASPOF RecName: Full=AP-3 complex subunit beta {ECO:0000256|PIRNR:PIRNR037096};	Vesicle coat complex AP-3, beta subunit	GO:0030123,AP-3 adaptor complex; GO:0030659,cytoplasmic vesicle membrane; GO:0005794,Golgi apparatus; GO:0006886,intracellular protein transport; GO:0016192,vesicle-mediated transport; GO:0006810,transport; GO:0006811,ion transport; GO:0006820,anion transport; GO:0008104,protein localization; GO:0008150,biological_process; GO:0009987,cellular process; GO:0015031,protein transport; GO:0015833,pept…	Adaptin N terminal region	--	--	--
Cluster-100108.1	3827	K12397 AP-3 complex subunit beta | (RefSeq) AP3-complex subunit beta-A (A)	--	AP3-complex subunit beta-A [Asparagus officinalis]	AP3BA_ARATH RecName: Full=AP3-complex subunit beta-A; AltName: Full=Adaptor protein complex AP-3 subunit beta-A; AltName: Full=Adaptor-related protein complex 3 subunit beta-A; AltName: Full=Beta-3B-adaptin; AltName: Full=Clathrin assembly protein complex 3 beta-A large chain; AltName: Full=Protein-affected trafficking 2;	A0A5P1EUH1_ASPOF RecName: Full=AP-3 complex subunit beta {ECO:0000256|PIRNR:PIRNR037096};	Vesicle coat complex AP-3, beta subunit	GO:0030123,AP-3 adaptor complex; GO:0030659,cytoplasmic vesicle membrane; GO:0005794,Golgi apparatus; GO:0006886,intracellular protein transport; GO:0016192,vesicle-mediated transport; GO:0006810,transport; GO:0006811,ion transport; GO:0006820,anion transport; GO:0008104,protein localization; GO:0008150,biological_process; GO:0009987,cellular process; GO:0015031,protein transport; GO:0015833,pept…	Adaptin N terminal region	--	--	--
Cluster-100108.2	2572	K12397 AP-3 complex subunit beta | (RefSeq) AP3-complex subunit beta-A (A)	--	AP3-complex subunit beta-A [Asparagus officinalis]	AP3BA_ARATH RecName: Full=AP3-complex subunit beta-A; AltName: Full=Adaptor protein complex AP-3 subunit beta-A; AltName: Full=Adaptor-related protein complex 3 subunit beta-A; AltName: Full=Beta-3B-adaptin; AltName: Full=Clathrin assembly protein complex 3 beta-A large chain; AltName: Full=Protein-affected trafficking 2;	A0A5P1EUH1_ASPOF RecName: Full=AP-3 complex subunit beta {ECO:0000256|PIRNR:PIRNR037096};	Vesicle coat complex AP-3, beta subunit	GO:0030123,AP-3 adaptor complex; GO:0030659,cytoplasmic vesicle membrane; GO:0005794,Golgi apparatus; GO:0006886,intracellular protein transport; GO:0016192,vesicle-mediated transport; GO:0006810,transport; GO:0006811,ion transport; GO:0006820,anion transport; GO:0008104,protein localization; GO:0008150,biological_process; GO:0009987,cellular process; GO:0015031,protein transport; GO:0015833,pept…	Adaptin N terminal region	--	--	--
Cluster-100108.3	3806	K12397 AP-3 complex subunit beta | (RefSeq) AP3-complex subunit beta-A (A)	--	AP3-complex subunit beta-A [Asparagus officinalis]	AP3BA_ARATH RecName: Full=AP3-complex subunit beta-A; AltName: Full=Adaptor protein complex AP-3 subunit beta-A; AltName: Full=Adaptor-related protein complex 3 subunit beta-A; AltName: Full=Beta-3B-adaptin; AltName: Full=Clathrin assembly protein complex 3 beta-A large chain; AltName: Full=Protein-affected trafficking 2;	A0A5P1EUH1_ASPOF RecName: Full=AP-3 complex subunit beta {ECO:0000256|PIRNR:PIRNR037096};	Vesicle coat complex AP-3, beta subunit	GO:0030123,AP-3 adaptor complex; GO:0030659,cytoplasmic vesicle membrane; GO:0005794,Golgi apparatus; GO:0006886,intracellular protein transport; GO:0016192,vesicle-mediated transport; GO:0006810,transport; GO:0006811,ion transport; GO:0006820,anion transport; GO:0008104,protein localization; GO:0008150,biological_process; GO:0009987,cellular process; GO:0015031,protein transport; GO:0015833,pept…	Adaptin N terminal region	--	--	--
Cluster-100108.4	3827	K12397 AP-3 complex subunit beta | (RefSeq) AP3-complex subunit beta-A (A)	--	AP3-complex subunit beta-A [Asparagus officinalis]	AP3BA_ARATH RecName: Full=AP3-complex subunit beta-A; AltName: Full=Adaptor protein complex AP-3 subunit beta-A; AltName: Full=Adaptor-related protein complex 3 subunit beta-A; AltName: Full=Beta-3B-adaptin; AltName: Full=Clathrin assembly protein complex 3 beta-A large chain; AltName: Full=Protein-affected trafficking 2;	A0A5P1EUH1_ASPOF RecName: Full=AP-3 complex subunit beta {ECO:0000256|PIRNR:PIRNR037096};	Vesicle coat complex AP-3, beta subunit	GO:0030123,AP-3 adaptor complex; GO:0030659,cytoplasmic vesicle membrane; GO:0005794,Golgi apparatus; GO:0006886,intracellular protein transport; GO:0016192,vesicle-mediated transport; GO:0006810,transport; GO:0006811,ion transport; GO:0006820,anion transport; GO:0008104,protein localization; GO:0008150,biological_process; GO:0009987,cellular process; GO:0015031,protein transport; GO:0015833,pept…	Adaptin N terminal region	--	--	--
Cluster-100109.0	585	K17604 zinc finger SWIM domain-containing protein 3 | (RefSeq) protein FAR1-RELATED SEQUENCE 4-like (A)	--	protein FAR1-RELATED SEQUENCE 9-like [Asparagus officinalis]	FHY3_ARATH RecName: Full=Protein FAR-RED ELONGATED HYPOCOTYL 3;	A0A484L9X8_9ASTE RecName: Full=Protein FAR1-RELATED SEQUENCE {ECO:0000256|RuleBase:RU367018};	--	GO:0005634,nucleus; GO:0001228,DNA-binding transcription activator activity, RNA polymerase II-specific; GO:0003700,DNA-binding transcription factor activity; GO:0008270,zinc ion binding; GO:0007623,circadian rhythm; GO:1900056,negative regulation of leaf senescence; GO:0042753,positive regulation of circadian rhythm; GO:0045893,positive regulation of transcription, DNA-templated; GO:0010017,red …	--	--	--	--
Cluster-10011.0	500	--	--	hypothetical protein Prudu_848S000100 [Prunus dulcis]	POLX_TOBAC RecName: Full=Retrovirus-related Pol polyprotein from transposon TNT 1-94; Includes: RecName: Full=Protease; EC=3.4.23.-; Includes: RecName: Full=Reverse transcriptase; EC=2.7.7.49; Includes: RecName: Full=Endonuclease;	A0A5H2XQM4_PRUDU RecName: Full=Integrase catalytic domain-containing protein {ECO:0000259|PROSITE:PS50994};	FOG: Transposon-encoded proteins with TYA, reverse transcriptase, integrase domains in various combinations	GO:0004190,aspartic-type endopeptidase activity; GO:0004519,endonuclease activity; GO:0003676,nucleic acid binding; GO:0003964,RNA-directed DNA polymerase activity; GO:0008270,zinc ion binding; GO:0015074,DNA integration; GO:0006508,proteolysis; GO:0003674,molecular_function; GO:0003824,catalytic activity; GO:0004175,endopeptidase activity; GO:0008233,peptidase activity; GO:0016787,hydrolase acti…	--	--	--	--
Cluster-100110.0	312	--	--	--	--	--	--	--	--	--	--	--
Cluster-100111.0	1272	K19893 glucan endo-1,3-beta-glucosidase 5/6 [EC:3.2.1.39] | (RefSeq) glucan endo-1,3-beta-glucosidase 5 (A)	ko00500: Starch and sucrose metabolism; ko01100: Metabolic pathways	glucan endo-1,3-beta-glucosidase 5 [Cocos nucifera]	E135_ARATH RecName: Full=Glucan endo-1,3-beta-glucosidase 5; EC=3.2.1.39; AltName: Full=(1->3)-beta-glucan endohydrolase 5; Short=(1->3)-beta-glucanase 5; AltName: Full=Beta-1,3-endoglucanase 5; Short=Beta-1,3-glucanase 5; Flags: Precursor;	A0A8K0IT08_COCNU SubName: Full=Glucan endo-1,3-beta-glucosidase 5 {ECO:0000313|EMBL:KAG1366418.1};	--	GO:0031225,anchored component of membrane; GO:0046658,anchored component of plasma membrane; GO:0005886,plasma membrane; GO:0009506,plasmodesma; GO:0005773,vacuole; GO:0042973,glucan endo-1,3-beta-D-glucosidase activity; GO:0005975,carbohydrate metabolic process; GO:0006952,defense response; GO:0003674,molecular_function; GO:0003824,catalytic activity; GO:0004553,hydrolase activity, hydrolyzing O…	Glycosyl hydrolases family 17	--	--	--
Cluster-100111.1	417	K19893 glucan endo-1,3-beta-glucosidase 5/6 [EC:3.2.1.39] | (RefSeq) glucan endo-1,3-beta-glucosidase 6 (A)	ko00500: Starch and sucrose metabolism; ko01100: Metabolic pathways	glucan endo-1,3-beta-glucosidase 5 [Cocos nucifera]	E135_ARATH RecName: Full=Glucan endo-1,3-beta-glucosidase 5; EC=3.2.1.39; AltName: Full=(1->3)-beta-glucan endohydrolase 5; Short=(1->3)-beta-glucanase 5; AltName: Full=Beta-1,3-endoglucanase 5; Short=Beta-1,3-glucanase 5; Flags: Precursor;	A0A8K0IT08_COCNU SubName: Full=Glucan endo-1,3-beta-glucosidase 5 {ECO:0000313|EMBL:KAG1366418.1};	--	GO:0031225,anchored component of membrane; GO:0046658,anchored component of plasma membrane; GO:0005886,plasma membrane; GO:0009506,plasmodesma; GO:0005773,vacuole; GO:0042973,glucan endo-1,3-beta-D-glucosidase activity; GO:0005975,carbohydrate metabolic process; GO:0006952,defense response; GO:0003674,molecular_function; GO:0003824,catalytic activity; GO:0004553,hydrolase activity, hydrolyzing O…	Glycosyl hydrolases family 17	--	--	--
Cluster-100112.0	650	--	--	--	--	--	--	--	--	--	--	--
Cluster-100112.1	596	--	--	--	--	--	--	--	--	--	--	--
Cluster-100113.0	1861	--	--	--	--	--	--	--	--	--	--	--
Cluster-100114.0	1446	K15015 solute carrier family 32 (vesicular inhibitory amino acid transporter) | (RefSeq) vacuolar amino acid transporter 1-like isoform X1 (A)	--	vacuolar amino acid transporter 1-like isoform X2 [Asparagus officinalis]	AVT1I_ARATH RecName: Full=Amino acid transporter AVT1I {ECO:0000305}; Short=AtAvt1I {ECO:0000303|PubMed:27925655};	A0A5P1FB46_ASPOF RecName: Full=Aa_trans domain-containing protein {ECO:0000259|Pfam:PF01490};	Amino acid transporters	GO:0016021,integral component of membrane; GO:0016020,membrane; GO:0000325,plant-type vacuole; GO:0015171,amino acid transmembrane transporter activity; GO:0003333,amino acid transmembrane transport; GO:0003674,molecular_function; GO:0005215,transporter activity; GO:0005342,organic acid transmembrane transporter activity; GO:0008509,anion transmembrane transporter activity; GO:0015075,ion transme…	Transmembrane amino acid transporter protein	--	--	--
Cluster-100115.0	2559	K14510 serine/threonine-protein kinase CTR1 [EC:2.7.11.1] | (RefSeq) serine/threonine-protein kinase CTR1-like isoform X1 (A)	ko04016: MAPK signaling pathway - plant; ko04075: Plant hormone signal transduction	serine/threonine-protein kinase STY46 isoform X1 [Asparagus officinalis]	STY46_ARATH RecName: Full=Serine/threonine-protein kinase STY46 {ECO:0000305}; EC=2.7.11.1 {ECO:0000269|PubMed:17090544}; AltName: Full=Serine/threonine/tyrosine-protein kinase 46 {ECO:0000303|PubMed:16429265};	A0A5P1FPA7_ASPOF SubName: Full=Uncharacterized protein {ECO:0000313|EMBL:ONK79864.1};	Tyrosine kinase specific for activated (GTP-bound) p21cdc42Hs	GO:0005829,cytosol; GO:0005524,ATP binding; GO:0106310,protein serine kinase activity; GO:0004674,protein serine/threonine kinase activity; GO:0004712,protein serine/threonine/tyrosine kinase activity; GO:0071456,cellular response to hypoxia; GO:0009658,chloroplast organization; GO:0006468,protein phosphorylation; GO:0009737,response to abscisic acid; GO:0000166,nucleotide binding; GO:0003674,mol…	Protein tyrosine and serine/threonine kinase	--	--	--
Cluster-100115.1	2558	K14510 serine/threonine-protein kinase CTR1 [EC:2.7.11.1] | (RefSeq) serine/threonine-protein kinase CTR1-like isoform X1 (A)	ko04016: MAPK signaling pathway - plant; ko04075: Plant hormone signal transduction	serine/threonine-protein kinase STY46 isoform X1 [Asparagus officinalis]	STY46_ARATH RecName: Full=Serine/threonine-protein kinase STY46 {ECO:0000305}; EC=2.7.11.1 {ECO:0000269|PubMed:17090544}; AltName: Full=Serine/threonine/tyrosine-protein kinase 46 {ECO:0000303|PubMed:16429265};	A0A5P1FPA7_ASPOF SubName: Full=Uncharacterized protein {ECO:0000313|EMBL:ONK79864.1};	Tyrosine kinase specific for activated (GTP-bound) p21cdc42Hs	GO:0005829,cytosol; GO:0005524,ATP binding; GO:0106310,protein serine kinase activity; GO:0004674,protein serine/threonine kinase activity; GO:0004712,protein serine/threonine/tyrosine kinase activity; GO:0071456,cellular response to hypoxia; GO:0009658,chloroplast organization; GO:0006468,protein phosphorylation; GO:0009737,response to abscisic acid; GO:0000166,nucleotide binding; GO:0003674,mol…	Protein tyrosine and serine/threonine kinase	--	--	--
Cluster-100116.0	520	--	--	--	--	--	--	--	--	--	--	--
Cluster-100117.0	1397	K03115 casein kinase II subunit beta | (RefSeq) casein kinase II subunit beta-1 (A)	ko03008: Ribosome biogenesis in eukaryotes; ko04712: Circadian rhythm - plant	hypothetical protein HHK36_028108 [Tetracentron sinense]	CSK2B_ARATH RecName: Full=Casein kinase II subunit beta-1 {ECO:0000305}; Short=CK II beta-1 {ECO:0000305};	A0A834YIV1_9MAGN RecName: Full=Casein kinase II subunit beta {ECO:0000256|RuleBase:RU361268}; Short=CK II beta {ECO:0000256|RuleBase:RU361268};	Casein kinase II, beta subunit	GO:0005737,cytoplasm; GO:0005829,cytosol; GO:0005634,nucleus; GO:0005956,protein kinase CK2 complex; GO:0019887,protein kinase regulator activity; GO:0006468,protein phosphorylation; GO:0071900,regulation of protein serine/threonine kinase activity; GO:0080163,regulation of protein serine/threonine phosphatase activity; GO:0003674,molecular_function; GO:0019207,kinase regulator activity; GO:00302…	--	--	--	--
Cluster-100117.1	1410	K03115 casein kinase II subunit beta | (RefSeq) hypothetical protein (A)	ko03008: Ribosome biogenesis in eukaryotes; ko04712: Circadian rhythm - plant	hypothetical protein HHK36_028108 [Tetracentron sinense]	CSK2B_ARATH RecName: Full=Casein kinase II subunit beta-1 {ECO:0000305}; Short=CK II beta-1 {ECO:0000305};	A0A834YIV1_9MAGN RecName: Full=Casein kinase II subunit beta {ECO:0000256|RuleBase:RU361268}; Short=CK II beta {ECO:0000256|RuleBase:RU361268};	Casein kinase II, beta subunit	GO:0005737,cytoplasm; GO:0005829,cytosol; GO:0005634,nucleus; GO:0005956,protein kinase CK2 complex; GO:0019887,protein kinase regulator activity; GO:0006468,protein phosphorylation; GO:0071900,regulation of protein serine/threonine kinase activity; GO:0080163,regulation of protein serine/threonine phosphatase activity; GO:0003674,molecular_function; GO:0019207,kinase regulator activity; GO:00302…	--	--	--	--
Cluster-100117.2	1401	K03115 casein kinase II subunit beta | (RefSeq) casein kinase II subunit beta-1 (A)	ko03008: Ribosome biogenesis in eukaryotes; ko04712: Circadian rhythm - plant	hypothetical protein HHK36_028108 [Tetracentron sinense]	CSK2B_ARATH RecName: Full=Casein kinase II subunit beta-1 {ECO:0000305}; Short=CK II beta-1 {ECO:0000305};	A0A834YIV1_9MAGN RecName: Full=Casein kinase II subunit beta {ECO:0000256|RuleBase:RU361268}; Short=CK II beta {ECO:0000256|RuleBase:RU361268};	Casein kinase II, beta subunit	GO:0005737,cytoplasm; GO:0005829,cytosol; GO:0005634,nucleus; GO:0005956,protein kinase CK2 complex; GO:0019887,protein kinase regulator activity; GO:0006468,protein phosphorylation; GO:0071900,regulation of protein serine/threonine kinase activity; GO:0080163,regulation of protein serine/threonine phosphatase activity; GO:0003674,molecular_function; GO:0019207,kinase regulator activity; GO:00302…	--	--	--	--
Cluster-100117.3	1397	K03115 casein kinase II subunit beta | (RefSeq) casein kinase II subunit beta-1 (A)	ko03008: Ribosome biogenesis in eukaryotes; ko04712: Circadian rhythm - plant	hypothetical protein HHK36_028108 [Tetracentron sinense]	CSK2B_ARATH RecName: Full=Casein kinase II subunit beta-1 {ECO:0000305}; Short=CK II beta-1 {ECO:0000305};	A0A834YIV1_9MAGN RecName: Full=Casein kinase II subunit beta {ECO:0000256|RuleBase:RU361268}; Short=CK II beta {ECO:0000256|RuleBase:RU361268};	Casein kinase II, beta subunit	GO:0005737,cytoplasm; GO:0005829,cytosol; GO:0005634,nucleus; GO:0005956,protein kinase CK2 complex; GO:0019887,protein kinase regulator activity; GO:0006468,protein phosphorylation; GO:0071900,regulation of protein serine/threonine kinase activity; GO:0080163,regulation of protein serine/threonine phosphatase activity; GO:0003674,molecular_function; GO:0019207,kinase regulator activity; GO:00302…	--	--	--	--
Cluster-100118.0	384	--	--	--	--	--	--	--	--	--	--	--
Cluster-100119.0	1694	K12829 splicing factor 3B subunit 2 | (RefSeq) uncharacterized protein LOC119336284 isoform X1 (A)	ko03040: Spliceosome	uncharacterized protein LOC109823291, partial [Asparagus officinalis]	--	A0A1U8AG50_NELNU SubName: Full=uncharacterized protein LOC104602608 {ECO:0000313|RefSeq:XP_010264658.1, ECO:0000313|RefSeq:XP_010264660.1};	--	--	Protein of unknown function (DUF707)	--	--	--
Cluster-10012.0	266	--	--	--	--	--	--	--	--	--	--	--
Cluster-100120.0	1941	K20890 xylan alpha-glucuronosyltransferase [EC:2.4.1.-] | (RefSeq) putative UDP-glucuronate:xylan alpha-glucuronosyltransferase 4 (A)	--	putative UPF0481 protein At3g02645 [Asparagus officinalis]	Y3264_ARATH RecName: Full=Putative UPF0481 protein At3g02645;	A0A5P1EWA6_ASPOF SubName: Full=Uncharacterized protein {ECO:0000313|EMBL:ONK70378.1};	--	GO:0016021,integral component of membrane; GO:0005575,cellular_component; GO:0016020,membrane; GO:0031224,intrinsic component of membrane; GO:0110165,cellular anatomical entity	Plant protein of unknown function	--	--	--
Cluster-100121.0	1988	--	--	--	--	--	--	--	--	--	--	--
Cluster-100122.0	1082	K20043 clathrin coat assembly protein AP180 | (RefSeq) putative clathrin assembly protein At5g35200 (A)	--	dof zinc finger protein DOF5.1 [Cocos nucifera]	DOF24_ARATH RecName: Full=Dof zinc finger protein DOF2.4 {ECO:0000303|PubMed:12475498}; Short=AtDOF2.4 {ECO:0000303|PubMed:12475498}; AltName: Full=Protein PHLOEM EARLY DOF 1 {ECO:0000303|PubMed:30626969};	A0A8K0IS55_COCNU SubName: Full=Dof zinc finger protein DOF5.1 {ECO:0000313|EMBL:KAG1365768.1};	--	GO:0005634,nucleus; GO:0055044,symplast; GO:0003700,DNA-binding transcription factor activity; GO:0046872,metal ion binding; GO:0000976,transcription regulatory region sequence-specific DNA binding; GO:0010497,plasmodesmata-mediated intercellular transport; GO:0006355,regulation of transcription, DNA-templated; GO:0090057,root radial pattern formation; GO:0003674,molecular_function; GO:0140110,tr…	Dof domain, zinc finger	C2C2-Dof	TF	C2C2->C2C2-Dof
Cluster-100122.1	1076	K20043 clathrin coat assembly protein AP180 | (RefSeq) putative clathrin assembly protein At5g35200 (A)	--	dof zinc finger protein DOF5.1 [Cocos nucifera]	DOF24_ARATH RecName: Full=Dof zinc finger protein DOF2.4 {ECO:0000303|PubMed:12475498}; Short=AtDOF2.4 {ECO:0000303|PubMed:12475498}; AltName: Full=Protein PHLOEM EARLY DOF 1 {ECO:0000303|PubMed:30626969};	A0A8K0IS55_COCNU SubName: Full=Dof zinc finger protein DOF5.1 {ECO:0000313|EMBL:KAG1365768.1};	--	GO:0005634,nucleus; GO:0055044,symplast; GO:0003700,DNA-binding transcription factor activity; GO:0046872,metal ion binding; GO:0000976,transcription regulatory region sequence-specific DNA binding; GO:0010497,plasmodesmata-mediated intercellular transport; GO:0006355,regulation of transcription, DNA-templated; GO:0090057,root radial pattern formation; GO:0003674,molecular_function; GO:0140110,tr…	Dof domain, zinc finger	C2C2-Dof	TF	C2C2->C2C2-Dof
Cluster-100123.0	708	--	--	--	--	--	--	--	--	--	--	--
Cluster-100123.1	697	--	--	--	--	--	--	--	--	--	--	--
Cluster-100123.2	361	--	--	--	--	--	--	--	--	--	--	--
Cluster-100124.0	710	K09522 DnaJ homolog subfamily C member 2 | (RefSeq) dnaJ homolog subfamily C member 2-like (A)	--	uncharacterized protein F54F2.9 [Asparagus officinalis]	MAMYB_ARATH RecName: Full=Transcription factor MAMYB {ECO:0000305}; AltName: Full=Membrane-anchored MYB {ECO:0000303|PubMed:21477080};	A0A5P1E275_ASPOF RecName: Full=Myb-like domain-containing protein {ECO:0000259|PROSITE:PS50090};	Zuotin and related molecular chaperones (DnaJ superfamily), contains DNA-binding domains	GO:0005829,cytosol; GO:0005783,endoplasmic reticulum; GO:0005789,endoplasmic reticulum membrane; GO:0016021,integral component of membrane; GO:0005634,nucleus; GO:0005886,plasma membrane; GO:0003677,DNA binding; GO:0030544,Hsp70 protein binding; GO:0043022,ribosome binding; GO:0051083,'de novo' cotranslational protein folding; GO:0006450,regulation of translational fidelity; GO:0048767,root hair …	Myb-like DNA-binding domain	--	--	--
Cluster-100124.1	1614	K09522 DnaJ homolog subfamily C member 2 | (RefSeq) hypothetical protein (A)	--	uncharacterized protein F54F2.9 [Asparagus officinalis]	MAMYB_ARATH RecName: Full=Transcription factor MAMYB {ECO:0000305}; AltName: Full=Membrane-anchored MYB {ECO:0000303|PubMed:21477080};	A0A5P1E275_ASPOF RecName: Full=Myb-like domain-containing protein {ECO:0000259|PROSITE:PS50090};	Zuotin and related molecular chaperones (DnaJ superfamily), contains DNA-binding domains	GO:0005829,cytosol; GO:0005783,endoplasmic reticulum; GO:0005789,endoplasmic reticulum membrane; GO:0016021,integral component of membrane; GO:0005634,nucleus; GO:0005886,plasma membrane; GO:0003677,DNA binding; GO:0030544,Hsp70 protein binding; GO:0043022,ribosome binding; GO:0051083,'de novo' cotranslational protein folding; GO:0006450,regulation of translational fidelity; GO:0048767,root hair …	Myb-like DNA-binding domain	MYB-related	TF	MYB->MYB-related
Cluster-100124.2	1731	K09522 DnaJ homolog subfamily C member 2 | (RefSeq) hypothetical protein (A)	--	uncharacterized protein F54F2.9 [Asparagus officinalis]	MAMYB_ARATH RecName: Full=Transcription factor MAMYB {ECO:0000305}; AltName: Full=Membrane-anchored MYB {ECO:0000303|PubMed:21477080};	A0A5P1E275_ASPOF RecName: Full=Myb-like domain-containing protein {ECO:0000259|PROSITE:PS50090};	Zuotin and related molecular chaperones (DnaJ superfamily), contains DNA-binding domains	GO:0005829,cytosol; GO:0005783,endoplasmic reticulum; GO:0005789,endoplasmic reticulum membrane; GO:0016021,integral component of membrane; GO:0005634,nucleus; GO:0005886,plasma membrane; GO:0003677,DNA binding; GO:0030544,Hsp70 protein binding; GO:0043022,ribosome binding; GO:0051083,'de novo' cotranslational protein folding; GO:0006450,regulation of translational fidelity; GO:0048767,root hair …	Myb-like DNA-binding domain	MYB-related	TF	MYB->MYB-related
Cluster-100124.3	849	K09522 DnaJ homolog subfamily C member 2 | (RefSeq) hypothetical protein (A)	--	uncharacterized protein F54F2.9 [Asparagus officinalis]	MAMYB_ARATH RecName: Full=Transcription factor MAMYB {ECO:0000305}; AltName: Full=Membrane-anchored MYB {ECO:0000303|PubMed:21477080};	A0A5P1E275_ASPOF RecName: Full=Myb-like domain-containing protein {ECO:0000259|PROSITE:PS50090};	Zuotin and related molecular chaperones (DnaJ superfamily), contains DNA-binding domains	GO:0005829,cytosol; GO:0005783,endoplasmic reticulum; GO:0005789,endoplasmic reticulum membrane; GO:0016021,integral component of membrane; GO:0005634,nucleus; GO:0005886,plasma membrane; GO:0003677,DNA binding; GO:0030544,Hsp70 protein binding; GO:0043022,ribosome binding; GO:0051083,'de novo' cotranslational protein folding; GO:0006450,regulation of translational fidelity; GO:0048767,root hair …	Myb-like DNA-binding domain	MYB-related	TF	MYB->MYB-related
Cluster-100125.0	2328	--	--	--	--	--	--	--	--	--	--	--
Cluster-100126.0	1114	K13458 disease resistance protein | (RefSeq) cysteine and histidine-rich domain-containing protein RAR1 isoform X1 (A)	ko04626: Plant-pathogen interaction	hypothetical protein BRADI_1g75162v3 [Brachypodium distachyon]	RAR1_ARATH RecName: Full=Cysteine and histidine-rich domain-containing protein RAR1; AltName: Full=AtRAR1; AltName: Full=CHORD domain-containing protein RAR1; AltName: Full=Protein PPHB SUSCEPTIBLE 2; AltName: Full=Protein REQUIRED FOR MLA12 RESISTANCE 1;	A0A453CPS7_AEGTS RecName: Full=CHORD domain-containing protein {ECO:0000259|Pfam:PF04968};	Zn2+-binding protein Melusin/RAR1, contains CHORD domain	GO:0005737,cytoplasm; GO:0005634,nucleus; GO:0051879,Hsp90 protein binding; GO:0008270,zinc ion binding; GO:0042742,defense response to bacterium; GO:0050832,defense response to fungus; GO:0009626,plant-type hypersensitive response; GO:0050821,protein stabilization; GO:0002679,respiratory burst involved in defense response; GO:0003674,molecular_function; GO:0005488,binding; GO:0005515,protein bin…	--	--	--	--
Cluster-100126.1	1687	--	--	--	--	--	--	--	--	--	--	--
Cluster-100126.2	713	--	--	--	--	--	--	--	--	--	--	--
Cluster-100126.3	1273	K13458 disease resistance protein | (RefSeq) cysteine and histidine-rich domain-containing protein RAR1 isoform X1 (A)	ko04626: Plant-pathogen interaction	hypothetical protein BRADI_1g75162v3 [Brachypodium distachyon]	RAR1_ARATH RecName: Full=Cysteine and histidine-rich domain-containing protein RAR1; AltName: Full=AtRAR1; AltName: Full=CHORD domain-containing protein RAR1; AltName: Full=Protein PPHB SUSCEPTIBLE 2; AltName: Full=Protein REQUIRED FOR MLA12 RESISTANCE 1;	A0A453CPS7_AEGTS RecName: Full=CHORD domain-containing protein {ECO:0000259|Pfam:PF04968};	Zn2+-binding protein Melusin/RAR1, contains CHORD domain	GO:0005737,cytoplasm; GO:0005634,nucleus; GO:0051879,Hsp90 protein binding; GO:0008270,zinc ion binding; GO:0042742,defense response to bacterium; GO:0050832,defense response to fungus; GO:0009626,plant-type hypersensitive response; GO:0050821,protein stabilization; GO:0002679,respiratory burst involved in defense response; GO:0003674,molecular_function; GO:0005488,binding; GO:0005515,protein bin…	--	--	--	--
Cluster-100126.4	1688	--	--	--	--	--	--	--	--	--	--	--
Cluster-100127.0	1250	--	--	--	--	--	--	--	--	--	--	--
Cluster-100128.0	760	--	--	--	--	--	--	--	--	--	--	--
Cluster-100129.0	436	--	--	--	--	--	--	--	--	--	--	--
Cluster-100129.1	441	--	--	--	--	--	--	--	--	--	--	--
Cluster-10013.0	1882	--	--	--	--	--	--	--	--	--	--	--
Cluster-100130.0	357	--	--	probable alkaline/neutral invertase D [Asparagus officinalis]	CINV2_ARATH RecName: Full=Alkaline/neutral invertase CINV2 {ECO:0000305}; EC=3.2.1.26 {ECO:0000269|PubMed:19470642}; AltName: Full=Alkaline/neutral invertase I {ECO:0000305}; Short=A/N-INVI {ECO:0000303|PubMed:21441406}; AltName: Full=Cytosolic invertase 2 {ECO:0000303|PubMed:19470642};	A0A5N6RKF3_9ROSI RecName: Full=Alkaline/neutral invertase {ECO:0000256|RuleBase:RU367047}; EC=3.2.1.26 {ECO:0000256|RuleBase:RU367047};	--	GO:0009507,chloroplast; GO:0005829,cytosol; GO:0004564,beta-fructofuranosidase activity; GO:0033926,glycopeptide alpha-N-acetylgalactosaminidase activity; GO:0004575,sucrose alpha-glucosidase activity; GO:0048364,root development; GO:0005987,sucrose catabolic process; GO:0003674,molecular_function; GO:0003824,catalytic activity; GO:0004553,hydrolase activity, hydrolyzing O-glycosyl compounds; GO:…	--	--	--	--
Cluster-100131.0	2240	--	--	--	--	--	--	--	--	--	--	--
Cluster-100132.0	619	--	--	--	--	--	--	--	--	--	--	--
Cluster-100133.0	2013	--	--	--	--	--	--	--	--	--	--	--
Cluster-100134.0	563	--	--	--	--	--	--	--	Plant thionin	--	--	--
Cluster-100135.0	2652	K19562 bifunctional dethiobiotin synthetase / adenosylmethionine---8-amino-7-oxononanoate aminotransferase [EC:6.3.3.3 2.6.1.62] | (RefSeq) LOW QUALITY PROTEIN: bifunctional dethiobiotin synthetase/7,8-diamino-pelargonic acid aminotransferase, mitochondrial (A)	ko00780: Biotin metabolism; ko01100: Metabolic pathways; ko01240: Biosynthesis of cofactors	LOW QUALITY PROTEIN: bifunctional dethiobiotin synthetase/7,8-diamino-pelargonic acid aminotransferase, mitochondrial, partial [Asparagus officinalis]	BIODA_ORYSJ RecName: Full=Bifunctional dethiobiotin synthetase/7,8-diamino-pelargonic acid aminotransferase, mitochondrial; AltName: Full=Bifunctional BIO3-BIO1 protein; Includes: RecName: Full=Dethiobiotin synthetase; EC=6.3.3.3; AltName: Full=DTB synthetase; Short=DTBS; AltName: Full=Protein BIOTIN AUXOTROPH 3; Includes: RecName: Full=7,8-diamino-pelargonic acid aminotransferase; Short=DAPA AT;…	A0A8B7CJ02_PHODC SubName: Full=bifunctional dethiobiotin synthetase/7,8-diamino-pelargonic acid aminotransferase, mitochondrial isoform X1 {ECO:0000313|RefSeq:XP_008800260.1};	Acetylornithine aminotransferase	GO:0005759,mitochondrial matrix; GO:0005739,mitochondrion; GO:0004015,adenosylmethionine-8-amino-7-oxononanoate transaminase activity; GO:0005524,ATP binding; GO:0004141,dethiobiotin synthase activity; GO:0000287,magnesium ion binding; GO:0042803,protein homodimerization activity; GO:0030170,pyridoxal phosphate binding; GO:0009102,biotin biosynthetic process; GO:0003674,molecular_function; GO:000…	Aminotransferase class-III	--	--	--
Cluster-100135.1	2656	K19562 bifunctional dethiobiotin synthetase / adenosylmethionine---8-amino-7-oxononanoate aminotransferase [EC:6.3.3.3 2.6.1.62] | (RefSeq) LOW QUALITY PROTEIN: bifunctional dethiobiotin synthetase/7,8-diamino-pelargonic acid aminotransferase, mitochondrial (A)	ko00780: Biotin metabolism; ko01100: Metabolic pathways; ko01240: Biosynthesis of cofactors	LOW QUALITY PROTEIN: bifunctional dethiobiotin synthetase/7,8-diamino-pelargonic acid aminotransferase, mitochondrial, partial [Asparagus officinalis]	BIODA_ORYSJ RecName: Full=Bifunctional dethiobiotin synthetase/7,8-diamino-pelargonic acid aminotransferase, mitochondrial; AltName: Full=Bifunctional BIO3-BIO1 protein; Includes: RecName: Full=Dethiobiotin synthetase; EC=6.3.3.3; AltName: Full=DTB synthetase; Short=DTBS; AltName: Full=Protein BIOTIN AUXOTROPH 3; Includes: RecName: Full=7,8-diamino-pelargonic acid aminotransferase; Short=DAPA AT;…	A0A8B7CJ02_PHODC SubName: Full=bifunctional dethiobiotin synthetase/7,8-diamino-pelargonic acid aminotransferase, mitochondrial isoform X1 {ECO:0000313|RefSeq:XP_008800260.1};	Acetylornithine aminotransferase	GO:0005759,mitochondrial matrix; GO:0005739,mitochondrion; GO:0004015,adenosylmethionine-8-amino-7-oxononanoate transaminase activity; GO:0005524,ATP binding; GO:0004141,dethiobiotin synthase activity; GO:0000287,magnesium ion binding; GO:0042803,protein homodimerization activity; GO:0030170,pyridoxal phosphate binding; GO:0009102,biotin biosynthetic process; GO:0003674,molecular_function; GO:000…	Aminotransferase class-III	--	--	--
Cluster-100135.2	2483	K19562 bifunctional dethiobiotin synthetase / adenosylmethionine---8-amino-7-oxononanoate aminotransferase [EC:6.3.3.3 2.6.1.62] | (RefSeq) LOW QUALITY PROTEIN: bifunctional dethiobiotin synthetase/7,8-diamino-pelargonic acid aminotransferase, mitochondrial (A)	ko00780: Biotin metabolism; ko01100: Metabolic pathways; ko01240: Biosynthesis of cofactors	LOW QUALITY PROTEIN: bifunctional dethiobiotin synthetase/7,8-diamino-pelargonic acid aminotransferase, mitochondrial, partial [Asparagus officinalis]	BIODA_ORYSJ RecName: Full=Bifunctional dethiobiotin synthetase/7,8-diamino-pelargonic acid aminotransferase, mitochondrial; AltName: Full=Bifunctional BIO3-BIO1 protein; Includes: RecName: Full=Dethiobiotin synthetase; EC=6.3.3.3; AltName: Full=DTB synthetase; Short=DTBS; AltName: Full=Protein BIOTIN AUXOTROPH 3; Includes: RecName: Full=7,8-diamino-pelargonic acid aminotransferase; Short=DAPA AT;…	A0A8B7CJ02_PHODC SubName: Full=bifunctional dethiobiotin synthetase/7,8-diamino-pelargonic acid aminotransferase, mitochondrial isoform X1 {ECO:0000313|RefSeq:XP_008800260.1};	Acetylornithine aminotransferase	GO:0005759,mitochondrial matrix; GO:0005739,mitochondrion; GO:0004015,adenosylmethionine-8-amino-7-oxononanoate transaminase activity; GO:0005524,ATP binding; GO:0004141,dethiobiotin synthase activity; GO:0000287,magnesium ion binding; GO:0042803,protein homodimerization activity; GO:0030170,pyridoxal phosphate binding; GO:0009102,biotin biosynthetic process; GO:0003674,molecular_function; GO:000…	Aminotransferase class-III	--	--	--
Cluster-100136.0	1141	--	--	--	--	A0A0D6QSY0_ARACU RecName: Full=Tnp_DDE_dom domain-containing protein {ECO:0000259|Pfam:PF13701};	--	--	Transposase DDE domain group 1	--	--	--
Cluster-100137.0	605	K03841 fructose-1,6-bisphosphatase I [EC:3.1.3.11] | (RefSeq) fructose-1,6-bisphosphatase, chloroplastic isoform X1 (A)	ko00010: Glycolysis / Gluconeogenesis; ko00030: Pentose phosphate pathway; ko00051: Fructose and mannose metabolism; ko00710: Carbon fixation in photosynthetic organisms; ko01100: Metabolic pathways; ko01110: Biosynthesis of secondary metabolites; ko01200: Carbon metabolism	fructose-1,6-bisphosphatase, chloroplastic isoform X2 [Asparagus officinalis]	F16P1_SPIOL RecName: Full=Fructose-1,6-bisphosphatase, chloroplastic; Short=FBPase; EC=3.1.3.11; AltName: Full=D-fructose-1,6-bisphosphate 1-phosphohydrolase; Flags: Precursor;	A0A2G5EKA8_AQUCA RecName: Full=Fructose-bisphosphatase {ECO:0000256|ARBA:ARBA00013093}; EC=3.1.3.11 {ECO:0000256|ARBA:ARBA00013093}; AltName: Full=D-fructose-1,6-bisphosphate 1-phosphohydrolase {ECO:0000256|ARBA:ARBA00032973};	Fructose-1,6-bisphosphatase	GO:0009507,chloroplast; GO:0042132,fructose 1,6-bisphosphate 1-phosphatase activity; GO:0046872,metal ion binding; GO:0019253,reductive pentose-phosphate cycle; GO:0003674,molecular_function; GO:0003824,catalytic activity; GO:0016787,hydrolase activity; GO:0016788,hydrolase activity, acting on ester bonds; GO:0016791,phosphatase activity; GO:0019203,carbohydrate phosphatase activity; GO:0042578,p…	--	--	--	--
Cluster-100138.0	1460	K14944 RNA-binding protein Nova | (RefSeq) protein BTR1-like isoform X1 (A)	--	protein BTR1-like isoform X1 [Asparagus officinalis]	BTR1_ARATH RecName: Full=Protein BTR1 {ECO:0000303|PubMed:18762309}; AltName: Full=Binding to ToMV RNA 1 {ECO:0000303|PubMed:18762309};	A0A6I9SJ70_ELAGV SubName: Full=protein BTR1 isoform X1 {ECO:0000313|RefSeq:XP_010940545.1};	RNA-binding protein NOVA1/PASILLA and related KH domain proteins	GO:0005737,cytoplasm; GO:0005829,cytosol; GO:0005886,plasma membrane; GO:0003729,mRNA binding; GO:0003727,single-stranded RNA binding; GO:0046719,regulation by virus of viral protein levels in host cell; GO:0010468,regulation of gene expression; GO:0008380,RNA splicing; GO:0003674,molecular_function; GO:0003676,nucleic acid binding; GO:0003723,RNA binding; GO:0005488,binding; GO:0097159,organic c…	KH domain	--	--	--
Cluster-100139.0	2007	K01913 acetate/butyrate---CoA ligase [EC:6.2.1.1 6.2.1.2] | (RefSeq) acetate/butyrate--CoA ligase AAE7, peroxisomal (A)	ko00010: Glycolysis / Gluconeogenesis; ko00620: Pyruvate metabolism; ko00630: Glyoxylate and dicarboxylate metabolism; ko00650: Butanoate metabolism; ko01100: Metabolic pathways; ko01110: Biosynthesis of secondary metabolites; ko01200: Carbon metabolism	4-coumarate:CoA ligase-like protein [Albuca bracteata]	CCL3_HUMLU RecName: Full=Acetate--CoA ligase CCL3 {ECO:0000305|PubMed:23300257}; Short=HlCCL3 {ECO:0000303|PubMed:23300257}; EC=6.2.1.1 {ECO:0000269|PubMed:23300257}; AltName: Full=2-methylbutanoate--CoA ligase CCL4 {ECO:0000305|PubMed:23300257}; EC=6.2.1.- {ECO:0000269|PubMed:23300257}; AltName: Full=2-methylpropanoate--CoA ligase CCL4 {ECO:0000305|PubMed:23300257}; EC=6.2.1.- {ECO:0000269|PubMe…	A0A0A1ERE6_ALBBR SubName: Full=4-coumarate:CoA ligase-like protein {ECO:0000313|EMBL:AIY34665.1};	Acyl-CoA synthetase	GO:0005829,cytosol; GO:0003987,acetate-CoA ligase activity; GO:0005524,ATP binding; GO:0047760,butyrate-CoA ligase activity; GO:0016405,CoA-ligase activity; GO:0043759,methylbutanoate-CoA ligase activity; GO:0050218,propionate-CoA ligase activity; GO:0003674,molecular_function; GO:0003824,catalytic activity; GO:0016874,ligase activity; GO:0016877,ligase activity, forming carbon-sulfur bonds; GO:0…	AMP-binding enzyme	--	--	--
Cluster-100139.1	3499	K01913 acetate/butyrate---CoA ligase [EC:6.2.1.1 6.2.1.2] | (RefSeq) LOW QUALITY PROTEIN: acetate/butyrate--CoA ligase AAE7, peroxisomal-like (A)	ko00010: Glycolysis / Gluconeogenesis; ko00620: Pyruvate metabolism; ko00630: Glyoxylate and dicarboxylate metabolism; ko00650: Butanoate metabolism; ko01100: Metabolic pathways; ko01110: Biosynthesis of secondary metabolites; ko01200: Carbon metabolism	LOW QUALITY PROTEIN: acetate/butyrate--CoA ligase AAE7, peroxisomal-like [Asparagus officinalis]	CCL3_HUMLU RecName: Full=Acetate--CoA ligase CCL3 {ECO:0000305|PubMed:23300257}; Short=HlCCL3 {ECO:0000303|PubMed:23300257}; EC=6.2.1.1 {ECO:0000269|PubMed:23300257}; AltName: Full=2-methylbutanoate--CoA ligase CCL4 {ECO:0000305|PubMed:23300257}; EC=6.2.1.- {ECO:0000269|PubMed:23300257}; AltName: Full=2-methylpropanoate--CoA ligase CCL4 {ECO:0000305|PubMed:23300257}; EC=6.2.1.- {ECO:0000269|PubMe…	A0A0A1ERE6_ALBBR SubName: Full=4-coumarate:CoA ligase-like protein {ECO:0000313|EMBL:AIY34665.1};	Acyl-CoA synthetase	GO:0005829,cytosol; GO:0003987,acetate-CoA ligase activity; GO:0005524,ATP binding; GO:0047760,butyrate-CoA ligase activity; GO:0016405,CoA-ligase activity; GO:0043759,methylbutanoate-CoA ligase activity; GO:0050218,propionate-CoA ligase activity; GO:0003674,molecular_function; GO:0003824,catalytic activity; GO:0016874,ligase activity; GO:0016877,ligase activity, forming carbon-sulfur bonds; GO:0…	AMP-binding enzyme	--	--	--
Cluster-100139.2	1361	K01913 acetate/butyrate---CoA ligase [EC:6.2.1.1 6.2.1.2] | (RefSeq) LOW QUALITY PROTEIN: acetate/butyrate--CoA ligase AAE7, peroxisomal-like (A)	ko00010: Glycolysis / Gluconeogenesis; ko00620: Pyruvate metabolism; ko00630: Glyoxylate and dicarboxylate metabolism; ko00650: Butanoate metabolism; ko01100: Metabolic pathways; ko01110: Biosynthesis of secondary metabolites; ko01200: Carbon metabolism	4-coumarate:CoA ligase-like protein [Albuca bracteata]	CCL3_HUMLU RecName: Full=Acetate--CoA ligase CCL3 {ECO:0000305|PubMed:23300257}; Short=HlCCL3 {ECO:0000303|PubMed:23300257}; EC=6.2.1.1 {ECO:0000269|PubMed:23300257}; AltName: Full=2-methylbutanoate--CoA ligase CCL4 {ECO:0000305|PubMed:23300257}; EC=6.2.1.- {ECO:0000269|PubMed:23300257}; AltName: Full=2-methylpropanoate--CoA ligase CCL4 {ECO:0000305|PubMed:23300257}; EC=6.2.1.- {ECO:0000269|PubMe…	A0A0A1ERE6_ALBBR SubName: Full=4-coumarate:CoA ligase-like protein {ECO:0000313|EMBL:AIY34665.1};	Acyl-CoA synthetase	GO:0005829,cytosol; GO:0003987,acetate-CoA ligase activity; GO:0005524,ATP binding; GO:0047760,butyrate-CoA ligase activity; GO:0016405,CoA-ligase activity; GO:0043759,methylbutanoate-CoA ligase activity; GO:0050218,propionate-CoA ligase activity; GO:0003674,molecular_function; GO:0003824,catalytic activity; GO:0016874,ligase activity; GO:0016877,ligase activity, forming carbon-sulfur bonds; GO:0…	AMP-binding enzyme	--	--	--
Cluster-10014.0	729	--	--	--	--	--	--	--	--	--	--	--
Cluster-100140.0	860	K06655 negative regulator of the PHO system [EC:2.7.11.22] | (RefSeq) negative regulator of the PHO system-like (A)	--	Pkinase-domain-containing protein [Meira miltonrushii]	CDC2A_ANTMA RecName: Full=Cell division control protein 2 homolog A; EC=2.7.11.22; EC=2.7.11.23;	A0A1D1YCY3_9ARAE SubName: Full=Negative regulator of the PHO system {ECO:0000313|EMBL:JAT52501.1};	Protein kinase PCTAIRE and related kinases	GO:0005524,ATP binding; GO:0004693,cyclin-dependent protein serine/threonine kinase activity; GO:0106310,protein serine kinase activity; GO:0008353,RNA polymerase II CTD heptapeptide repeat kinase activity; GO:0007049,cell cycle; GO:0051301,cell division; GO:0006468,protein phosphorylation; GO:0000166,nucleotide binding; GO:0003674,molecular_function; GO:0005488,binding; GO:0017076,purine nucleot…	Protein kinase domain	--	--	--
Cluster-100141.0	2215	--	--	--	--	--	--	--	--	--	--	--
Cluster-100141.1	3605	--	--	--	--	--	--	--	--	--	--	--
Cluster-100142.0	1976	--	--	--	--	--	--	--	--	--	--	--
Cluster-100142.1	543	--	--	--	--	--	--	--	--	--	--	--
Cluster-100143.0	1203	--	--	--	--	--	--	--	--	--	--	--
Cluster-100144.0	1267	--	--	--	--	--	--	--	--	--	--	--
Cluster-100144.1	262	--	--	--	--	--	--	--	--	--	--	--
Cluster-100145.0	1613	--	--	--	--	--	--	--	--	--	--	--
Cluster-100145.1	1520	--	--	--	--	--	--	--	--	--	--	--
Cluster-100145.2	1697	--	--	--	--	--	--	--	--	--	--	--
Cluster-100146.0	695	--	--	--	--	--	--	--	--	--	--	--
Cluster-100146.1	1722	--	--	--	--	--	--	--	--	--	--	--
Cluster-100146.2	1381	--	--	--	--	--	--	--	--	--	--	--
Cluster-100146.3	487	--	--	--	--	--	--	--	--	--	--	--
Cluster-100146.4	672	--	--	--	--	--	--	--	--	--	--	--
Cluster-100147.0	393	--	--	--	--	--	--	--	--	--	--	--
Cluster-100148.0	2943	--	--	--	--	--	--	--	--	--	--	--
Cluster-100149.0	653	--	--	--	--	--	--	--	--	--	--	--
Cluster-10015.0	368	--	--	--	--	--	--	--	--	--	--	--
Cluster-100150.0	391	--	--	--	--	--	--	--	--	--	--	--
Cluster-100151.0	829	--	--	--	--	--	--	--	--	--	--	--
Cluster-100152.0	552	--	--	--	--	--	--	--	--	--	--	--
Cluster-100153.0	743	--	--	--	--	--	--	--	--	--	--	--
Cluster-100153.1	262	K05681 ATP-binding cassette, subfamily G (WHITE), member 2 | (RefSeq) LOW QUALITY PROTEIN: ABC transporter G family member 22 (A)	ko02010: ABC transporters	ABC transporter G family member 22-like [Trifolium medium]	AB22G_ARATH RecName: Full=ABC transporter G family member 22; Short=ABC transporter ABCG.22; Short=AtABCG22; AltName: Full=White-brown complex homolog protein 23; Short=AtWBC23;	A0A392N4D4_9FABA SubName: Full=ABC transporter G family member 22-like {ECO:0000313|EMBL:MCH94039.1}; Flags: Fragment;	Transporter, ABC superfamily (Breast cancer resistance protein)	GO:0016021,integral component of membrane; GO:0016020,membrane; GO:0005524,ATP binding; GO:0042626,ATPase-coupled transmembrane transporter activity; GO:0009414,response to water deprivation; GO:0055085,transmembrane transport; GO:0010148,transpiration; GO:0000166,nucleotide binding; GO:0003674,molecular_function; GO:0005488,binding; GO:0017076,purine nucleotide binding; GO:0030554,adenyl nucleot…	--	--	--	--
Cluster-100153.2	2060	--	--	microtubule-associated protein 70-1-like [Asparagus officinalis]	MP701_ORYSJ RecName: Full=Microtubule-associated protein 70-1; Short=AtMAP70-1; AltName: Full=70 kDa microtubule-associated protein 1;	A0A5P1FKS4_ASPOF SubName: Full=Uncharacterized protein {ECO:0000313|EMBL:ONK78818.1};	--	GO:0005737,cytoplasm; GO:0005874,microtubule; GO:0008017,microtubule binding; GO:0007010,cytoskeleton organization; GO:0003674,molecular_function; GO:0005488,binding; GO:0005515,protein binding; GO:0008092,cytoskeletal protein binding; GO:0015631,tubulin binding; GO:0006996,organelle organization; GO:0008150,biological_process; GO:0009987,cellular process; GO:0016043,cellular component organizati…	Microtubule-associated protein 70	--	--	--
Cluster-100153.3	1172	K05681 ATP-binding cassette, subfamily G (WHITE), member 2 | (RefSeq) ABC transporter G family member 22 isoform X1 (A)	ko02010: ABC transporters	ABC transporter G family member 22 isoform X3 [Phoenix dactylifera]	AB22G_ARATH RecName: Full=ABC transporter G family member 22; Short=ABC transporter ABCG.22; Short=AtABCG22; AltName: Full=White-brown complex homolog protein 23; Short=AtWBC23;	A0A8B8J4U2_PHODC SubName: Full=ABC transporter G family member 22 isoform X3 {ECO:0000313|RefSeq:XP_026660737.1};	Transporter, ABC superfamily (Breast cancer resistance protein)	GO:0016021,integral component of membrane; GO:0016020,membrane; GO:0005524,ATP binding; GO:0042626,ATPase-coupled transmembrane transporter activity; GO:0009414,response to water deprivation; GO:0055085,transmembrane transport; GO:0010148,transpiration; GO:0000166,nucleotide binding; GO:0003674,molecular_function; GO:0005488,binding; GO:0017076,purine nucleotide binding; GO:0030554,adenyl nucleot…	Microtubule-associated protein 70	--	--	--
Cluster-100153.4	1165	K05681 ATP-binding cassette, subfamily G (WHITE), member 2 | (RefSeq) ABC transporter G family member 22 isoform X1 (A)	ko02010: ABC transporters	microtubule-associated protein 70-1-like [Dioscorea cayenensis subsp. rotundata]	MP701_ORYSJ RecName: Full=Microtubule-associated protein 70-1; Short=AtMAP70-1; AltName: Full=70 kDa microtubule-associated protein 1;	A0A6I9QTD9_ELAGV SubName: Full=microtubule-associated protein 70-1 {ECO:0000313|RefSeq:XP_010914823.1};	--	GO:0005737,cytoplasm; GO:0005874,microtubule; GO:0008017,microtubule binding; GO:0007010,cytoskeleton organization; GO:0003674,molecular_function; GO:0005488,binding; GO:0005515,protein binding; GO:0008092,cytoskeletal protein binding; GO:0015631,tubulin binding; GO:0006996,organelle organization; GO:0008150,biological_process; GO:0009987,cellular process; GO:0016043,cellular component organizati…	Microtubule-associated protein 70	--	--	--
Cluster-100153.5	1026	--	--	microtubule-associated protein 70-1-like [Dioscorea cayenensis subsp. rotundata]	MP701_ORYSJ RecName: Full=Microtubule-associated protein 70-1; Short=AtMAP70-1; AltName: Full=70 kDa microtubule-associated protein 1;	A0A6I9QTD9_ELAGV SubName: Full=microtubule-associated protein 70-1 {ECO:0000313|RefSeq:XP_010914823.1};	--	GO:0005737,cytoplasm; GO:0005874,microtubule; GO:0008017,microtubule binding; GO:0007010,cytoskeleton organization; GO:0003674,molecular_function; GO:0005488,binding; GO:0005515,protein binding; GO:0008092,cytoskeletal protein binding; GO:0015631,tubulin binding; GO:0006996,organelle organization; GO:0008150,biological_process; GO:0009987,cellular process; GO:0016043,cellular component organizati…	Microtubule-associated protein 70	--	--	--
Cluster-100153.6	728	K05681 ATP-binding cassette, subfamily G (WHITE), member 2 | (RefSeq) LOW QUALITY PROTEIN: ABC transporter G family member 22 (A)	ko02010: ABC transporters	LOW QUALITY PROTEIN: ABC transporter G family member 22 [Asparagus officinalis]	AB22G_ARATH RecName: Full=ABC transporter G family member 22; Short=ABC transporter ABCG.22; Short=AtABCG22; AltName: Full=White-brown complex homolog protein 23; Short=AtWBC23;	A0A6I9QZE6_ELAGV SubName: Full=ABC transporter G family member 22 {ECO:0000313|RefSeq:XP_010917903.1};	Transporter, ABC superfamily (Breast cancer resistance protein)	GO:0016021,integral component of membrane; GO:0016020,membrane; GO:0005524,ATP binding; GO:0042626,ATPase-coupled transmembrane transporter activity; GO:0009414,response to water deprivation; GO:0055085,transmembrane transport; GO:0010148,transpiration; GO:0000166,nucleotide binding; GO:0003674,molecular_function; GO:0005488,binding; GO:0017076,purine nucleotide binding; GO:0030554,adenyl nucleot…	ABC transporter	--	--	--
Cluster-100153.7	2412	--	--	microtubule-associated protein 70-1-like [Asparagus officinalis]	MP701_ORYSJ RecName: Full=Microtubule-associated protein 70-1; Short=AtMAP70-1; AltName: Full=70 kDa microtubule-associated protein 1;	A0A5P1FKS4_ASPOF SubName: Full=Uncharacterized protein {ECO:0000313|EMBL:ONK78818.1};	--	GO:0005737,cytoplasm; GO:0005874,microtubule; GO:0008017,microtubule binding; GO:0007010,cytoskeleton organization; GO:0003674,molecular_function; GO:0005488,binding; GO:0005515,protein binding; GO:0008092,cytoskeletal protein binding; GO:0015631,tubulin binding; GO:0006996,organelle organization; GO:0008150,biological_process; GO:0009987,cellular process; GO:0016043,cellular component organizati…	Microtubule-associated protein 70	--	--	--
Cluster-100153.8	1741	K05681 ATP-binding cassette, subfamily G (WHITE), member 2 | (RefSeq) LOW QUALITY PROTEIN: ABC transporter G family member 22 (A)	ko02010: ABC transporters	LOW QUALITY PROTEIN: ABC transporter G family member 22 [Asparagus officinalis]	AB22G_ARATH RecName: Full=ABC transporter G family member 22; Short=ABC transporter ABCG.22; Short=AtABCG22; AltName: Full=White-brown complex homolog protein 23; Short=AtWBC23;	A0A8B7MTW0_PHODC SubName: Full=ABC transporter G family member 22 isoform X1 {ECO:0000313|RefSeq:XP_008790010.2, ECO:0000313|RefSeq:XP_017698339.2};	Transporter, ABC superfamily (Breast cancer resistance protein)	GO:0016021,integral component of membrane; GO:0016020,membrane; GO:0005524,ATP binding; GO:0042626,ATPase-coupled transmembrane transporter activity; GO:0009414,response to water deprivation; GO:0055085,transmembrane transport; GO:0010148,transpiration; GO:0000166,nucleotide binding; GO:0003674,molecular_function; GO:0005488,binding; GO:0017076,purine nucleotide binding; GO:0030554,adenyl nucleot…	ABC transporter	--	--	--
Cluster-100154.0	328	--	--	--	--	--	--	--	--	--	--	--
Cluster-100155.0	716	--	--	--	--	--	--	--	--	--	--	--
Cluster-100156.0	996	K01802 peptidylprolyl isomerase [EC:5.2.1.8] | (RefSeq) peptidyl-prolyl cis-trans isomerase CYP19-4-like isoform X1 (A)	--	peptidyl-prolyl cis-trans isomerase CYP19-4-like isoform X2 [Asparagus officinalis]	CP20A_ARATH RecName: Full=Peptidyl-prolyl cis-trans isomerase CYP20-1; Short=PPIase CYP20-1; EC=5.2.1.8; AltName: Full=Cyclophilin of 20 kDa 1; AltName: Full=Rotamase CYP20-1; AltName: Full=Rotamase cyclophilin-7; Flags: Precursor;	A0A5P1EPM9_ASPOF RecName: Full=Peptidyl-prolyl cis-trans isomerase {ECO:0000256|RuleBase:RU363019}; Short=PPIase {ECO:0000256|RuleBase:RU363019}; EC=5.2.1.8 {ECO:0000256|RuleBase:RU363019};	Cyclophilin type peptidyl-prolyl cis-trans isomerase	GO:0009507,chloroplast; GO:0005737,cytoplasm; GO:0005783,endoplasmic reticulum; GO:0005576,extracellular region; GO:0043231,intracellular membrane-bounded organelle; GO:0009506,plasmodesma; GO:0009536,plastid; GO:0016018,cyclosporin A binding; GO:0003755,peptidyl-prolyl cis-trans isomerase activity; GO:0006457,protein folding; GO:0000413,protein peptidyl-prolyl isomerization; GO:0048364,root deve…	Cyclophilin type peptidyl-prolyl cis-trans isomerase/CLD	--	--	--
Cluster-100156.1	913	K01802 peptidylprolyl isomerase [EC:5.2.1.8] | (RefSeq) peptidyl-prolyl cis-trans isomerase CYP19-4-like isoform X1 (A)	--	peptidyl-prolyl cis-trans isomerase CYP19-4-like isoform X2 [Asparagus officinalis]	CP20A_ARATH RecName: Full=Peptidyl-prolyl cis-trans isomerase CYP20-1; Short=PPIase CYP20-1; EC=5.2.1.8; AltName: Full=Cyclophilin of 20 kDa 1; AltName: Full=Rotamase CYP20-1; AltName: Full=Rotamase cyclophilin-7; Flags: Precursor;	A0A5P1EPM9_ASPOF RecName: Full=Peptidyl-prolyl cis-trans isomerase {ECO:0000256|RuleBase:RU363019}; Short=PPIase {ECO:0000256|RuleBase:RU363019}; EC=5.2.1.8 {ECO:0000256|RuleBase:RU363019};	Cyclophilin type peptidyl-prolyl cis-trans isomerase	GO:0009507,chloroplast; GO:0005737,cytoplasm; GO:0005783,endoplasmic reticulum; GO:0005576,extracellular region; GO:0043231,intracellular membrane-bounded organelle; GO:0009506,plasmodesma; GO:0009536,plastid; GO:0016018,cyclosporin A binding; GO:0003755,peptidyl-prolyl cis-trans isomerase activity; GO:0006457,protein folding; GO:0000413,protein peptidyl-prolyl isomerization; GO:0048364,root deve…	Cyclophilin type peptidyl-prolyl cis-trans isomerase/CLD	--	--	--
Cluster-100156.2	913	K01802 peptidylprolyl isomerase [EC:5.2.1.8] | (RefSeq) peptidyl-prolyl cis-trans isomerase CYP19-4-like isoform X1 (A)	--	peptidyl-prolyl cis-trans isomerase CYP19-4-like isoform X2 [Asparagus officinalis]	CP20A_ARATH RecName: Full=Peptidyl-prolyl cis-trans isomerase CYP20-1; Short=PPIase CYP20-1; EC=5.2.1.8; AltName: Full=Cyclophilin of 20 kDa 1; AltName: Full=Rotamase CYP20-1; AltName: Full=Rotamase cyclophilin-7; Flags: Precursor;	A0A5P1EPM9_ASPOF RecName: Full=Peptidyl-prolyl cis-trans isomerase {ECO:0000256|RuleBase:RU363019}; Short=PPIase {ECO:0000256|RuleBase:RU363019}; EC=5.2.1.8 {ECO:0000256|RuleBase:RU363019};	Cyclophilin type peptidyl-prolyl cis-trans isomerase	GO:0009507,chloroplast; GO:0005737,cytoplasm; GO:0005783,endoplasmic reticulum; GO:0005576,extracellular region; GO:0043231,intracellular membrane-bounded organelle; GO:0009506,plasmodesma; GO:0009536,plastid; GO:0016018,cyclosporin A binding; GO:0003755,peptidyl-prolyl cis-trans isomerase activity; GO:0006457,protein folding; GO:0000413,protein peptidyl-prolyl isomerization; GO:0048364,root deve…	Cyclophilin type peptidyl-prolyl cis-trans isomerase/CLD	--	--	--
Cluster-100156.3	913	K01802 peptidylprolyl isomerase [EC:5.2.1.8] | (RefSeq) peptidyl-prolyl cis-trans isomerase CYP19-4-like isoform X1 (A)	--	peptidyl-prolyl cis-trans isomerase CYP19-4-like isoform X2 [Asparagus officinalis]	CP20A_ARATH RecName: Full=Peptidyl-prolyl cis-trans isomerase CYP20-1; Short=PPIase CYP20-1; EC=5.2.1.8; AltName: Full=Cyclophilin of 20 kDa 1; AltName: Full=Rotamase CYP20-1; AltName: Full=Rotamase cyclophilin-7; Flags: Precursor;	A0A5P1EPM9_ASPOF RecName: Full=Peptidyl-prolyl cis-trans isomerase {ECO:0000256|RuleBase:RU363019}; Short=PPIase {ECO:0000256|RuleBase:RU363019}; EC=5.2.1.8 {ECO:0000256|RuleBase:RU363019};	Cyclophilin type peptidyl-prolyl cis-trans isomerase	GO:0009507,chloroplast; GO:0005737,cytoplasm; GO:0005783,endoplasmic reticulum; GO:0005576,extracellular region; GO:0043231,intracellular membrane-bounded organelle; GO:0009506,plasmodesma; GO:0009536,plastid; GO:0016018,cyclosporin A binding; GO:0003755,peptidyl-prolyl cis-trans isomerase activity; GO:0006457,protein folding; GO:0000413,protein peptidyl-prolyl isomerization; GO:0048364,root deve…	Cyclophilin type peptidyl-prolyl cis-trans isomerase/CLD	--	--	--
Cluster-100156.4	1026	K01802 peptidylprolyl isomerase [EC:5.2.1.8] | (RefSeq) peptidyl-prolyl cis-trans isomerase CYP19-4-like isoform X1 (A)	--	peptidyl-prolyl cis-trans isomerase CYP19-4-like isoform X2 [Asparagus officinalis]	CP20A_ARATH RecName: Full=Peptidyl-prolyl cis-trans isomerase CYP20-1; Short=PPIase CYP20-1; EC=5.2.1.8; AltName: Full=Cyclophilin of 20 kDa 1; AltName: Full=Rotamase CYP20-1; AltName: Full=Rotamase cyclophilin-7; Flags: Precursor;	A0A5P1EPM9_ASPOF RecName: Full=Peptidyl-prolyl cis-trans isomerase {ECO:0000256|RuleBase:RU363019}; Short=PPIase {ECO:0000256|RuleBase:RU363019}; EC=5.2.1.8 {ECO:0000256|RuleBase:RU363019};	Cyclophilin type peptidyl-prolyl cis-trans isomerase	GO:0009507,chloroplast; GO:0005737,cytoplasm; GO:0005783,endoplasmic reticulum; GO:0005576,extracellular region; GO:0043231,intracellular membrane-bounded organelle; GO:0009506,plasmodesma; GO:0009536,plastid; GO:0016018,cyclosporin A binding; GO:0003755,peptidyl-prolyl cis-trans isomerase activity; GO:0006457,protein folding; GO:0000413,protein peptidyl-prolyl isomerization; GO:0048364,root deve…	Cyclophilin type peptidyl-prolyl cis-trans isomerase/CLD	--	--	--
Cluster-100156.5	913	K01802 peptidylprolyl isomerase [EC:5.2.1.8] | (RefSeq) peptidyl-prolyl cis-trans isomerase CYP19-4-like isoform X1 (A)	--	peptidyl-prolyl cis-trans isomerase CYP19-4-like isoform X2 [Asparagus officinalis]	CP20A_ARATH RecName: Full=Peptidyl-prolyl cis-trans isomerase CYP20-1; Short=PPIase CYP20-1; EC=5.2.1.8; AltName: Full=Cyclophilin of 20 kDa 1; AltName: Full=Rotamase CYP20-1; AltName: Full=Rotamase cyclophilin-7; Flags: Precursor;	A0A5P1EPM9_ASPOF RecName: Full=Peptidyl-prolyl cis-trans isomerase {ECO:0000256|RuleBase:RU363019}; Short=PPIase {ECO:0000256|RuleBase:RU363019}; EC=5.2.1.8 {ECO:0000256|RuleBase:RU363019};	Cyclophilin type peptidyl-prolyl cis-trans isomerase	GO:0009507,chloroplast; GO:0005737,cytoplasm; GO:0005783,endoplasmic reticulum; GO:0005576,extracellular region; GO:0043231,intracellular membrane-bounded organelle; GO:0009506,plasmodesma; GO:0009536,plastid; GO:0016018,cyclosporin A binding; GO:0003755,peptidyl-prolyl cis-trans isomerase activity; GO:0006457,protein folding; GO:0000413,protein peptidyl-prolyl isomerization; GO:0048364,root deve…	Cyclophilin type peptidyl-prolyl cis-trans isomerase/CLD	--	--	--
Cluster-100157.0	509	--	--	pentatricopeptide repeat protein AaPPR10 [Agave angustifolia]	PPR5_MAIZE RecName: Full=Pentatricopeptide repeat-containing protein PPR5, chloroplastic {ECO:0000305}; AltName: Full=Pentatricopeptide repeat-containing protein 5 {ECO:0000303|PubMed:18591259}; Short=ZmPPR5 {ECO:0000303|PubMed:18591259}; Flags: Precursor;	A0A5P1FBD5_ASPOF SubName: Full=Uncharacterized protein {ECO:0000313|EMBL:ONK75482.1};	FOG: PPR repeat	GO:0009507,chloroplast; GO:0003729,mRNA binding; GO:0003727,single-stranded RNA binding; GO:0031425,chloroplast RNA processing; GO:0009793,embryo development ending in seed dormancy; GO:0000373,Group II intron splicing; GO:0006397,mRNA processing; GO:0006417,regulation of translation; GO:0003674,molecular_function; GO:0003676,nucleic acid binding; GO:0003723,RNA binding; GO:0005488,binding; GO:00…	--	--	--	--
Cluster-100158.0	1424	--	--	--	--	--	--	--	--	--	--	--
Cluster-100159.0	1374	K20769 fatty acid omega-hydroxylase [EC:1.14.-.-] | (RefSeq) cytochrome P450 94A2-like (A)	ko00073: Cutin, suberine and wax biosynthesis	cytochrome P450 94A1-like [Phoenix dactylifera]	C94A2_VICSA RecName: Full=Cytochrome P450 94A2; EC=1.14.-.-; AltName: Full=P450-dependent fatty acid omega-hydroxylase;	A0A8B7C2L3_PHODC SubName: Full=cytochrome P450 94A1-like {ECO:0000313|RefSeq:XP_008790365.1};	Cytochrome P450 CYP4/CYP19/CYP26 subfamilies	GO:0005789,endoplasmic reticulum membrane; GO:0016021,integral component of membrane; GO:0020037,heme binding; GO:0005506,iron ion binding; GO:0004497,monooxygenase activity; GO:0016705,oxidoreductase activity, acting on paired donors, with incorporation or reduction of molecular oxygen; GO:0003674,molecular_function; GO:0005488,binding; GO:0046906,tetrapyrrole binding; GO:0097159,organic cyclic …	Cytochrome P450	--	--	--
Cluster-100159.1	763	K20665 jasmonoyl-L-amino acid 12-hydroxylase [EC:1.14.14.48] | (RefSeq) cytochrome P450 94B3-like (A)	--	uncharacterized protein A4U43_C08F16720 [Asparagus officinalis]	C04C1_PINTA RecName: Full=Cytochrome P450 704C1; EC=1.14.-.-; AltName: Full=Cytochrome P450 CYPD;	A0A8B7C2L3_PHODC SubName: Full=cytochrome P450 94A1-like {ECO:0000313|RefSeq:XP_008790365.1};	Cytochrome P450 CYP4/CYP19/CYP26 subfamilies	GO:0016021,integral component of membrane; GO:0020037,heme binding; GO:0005506,iron ion binding; GO:0004497,monooxygenase activity; GO:0016705,oxidoreductase activity, acting on paired donors, with incorporation or reduction of molecular oxygen; GO:0003674,molecular_function; GO:0005488,binding; GO:0046906,tetrapyrrole binding; GO:0097159,organic cyclic compound binding; GO:1901363,heterocyclic c…	Cytochrome P450	--	--	--
Cluster-100159.2	657	K20665 jasmonoyl-L-amino acid 12-hydroxylase [EC:1.14.14.48] | (RefSeq) cytochrome P450 94B3-like (A)	--	uncharacterized protein A4U43_C08F16720 [Asparagus officinalis]	C04C1_PINTA RecName: Full=Cytochrome P450 704C1; EC=1.14.-.-; AltName: Full=Cytochrome P450 CYPD;	A0A8B7C2L3_PHODC SubName: Full=cytochrome P450 94A1-like {ECO:0000313|RefSeq:XP_008790365.1};	Cytochrome P450 CYP4/CYP19/CYP26 subfamilies	GO:0016021,integral component of membrane; GO:0020037,heme binding; GO:0005506,iron ion binding; GO:0004497,monooxygenase activity; GO:0016705,oxidoreductase activity, acting on paired donors, with incorporation or reduction of molecular oxygen; GO:0003674,molecular_function; GO:0005488,binding; GO:0046906,tetrapyrrole binding; GO:0097159,organic cyclic compound binding; GO:1901363,heterocyclic c…	Cytochrome P450	--	--	--
Cluster-10016.0	331	--	--	--	--	--	--	--	--	--	--	--
Cluster-100160.0	459	K19366 spartin | (RefSeq) protein EARLY-RESPONSIVE TO DEHYDRATION 7, chloroplastic (A)	ko04144: Endocytosis	protein EARLY-RESPONSIVE TO DEHYDRATION 7, chloroplastic isoform X2 [Elaeis guineensis]	ERD7_ARATH RecName: Full=Protein EARLY-RESPONSIVE TO DEHYDRATION 7, chloroplastic {ECO:0000303|PubMed:8075396}; Flags: Precursor;	A0A8N4F2Q6_ELAGV SubName: Full=protein EARLY-RESPONSIVE TO DEHYDRATION 7, chloroplastic isoform X2 {ECO:0000313|RefSeq:XP_029120063.1};	--	GO:0009507,chloroplast; GO:0005886,plasma membrane; GO:0007623,circadian rhythm; GO:0009737,response to abscisic acid; GO:0009409,response to cold; GO:0009644,response to high light intensity; GO:0009651,response to salt stress; GO:0009414,response to water deprivation; GO:0008150,biological_process; GO:0048511,rhythmic process; GO:0009719,response to endogenous stimulus; GO:0009725,response to h…	--	--	--	--
Cluster-100160.1	520	K19366 spartin | (RefSeq) protein EARLY-RESPONSIVE TO DEHYDRATION 7, chloroplastic (A)	ko04144: Endocytosis	protein EARLY-RESPONSIVE TO DEHYDRATION 7, chloroplastic isoform X2 [Elaeis guineensis]	ERD7_ARATH RecName: Full=Protein EARLY-RESPONSIVE TO DEHYDRATION 7, chloroplastic {ECO:0000303|PubMed:8075396}; Flags: Precursor;	A0A8N4F2Q6_ELAGV SubName: Full=protein EARLY-RESPONSIVE TO DEHYDRATION 7, chloroplastic isoform X2 {ECO:0000313|RefSeq:XP_029120063.1};	--	GO:0009507,chloroplast; GO:0005886,plasma membrane; GO:0007623,circadian rhythm; GO:0009737,response to abscisic acid; GO:0009409,response to cold; GO:0009644,response to high light intensity; GO:0009651,response to salt stress; GO:0009414,response to water deprivation; GO:0008150,biological_process; GO:0048511,rhythmic process; GO:0009719,response to endogenous stimulus; GO:0009725,response to h…	--	--	--	--
Cluster-100160.2	469	K19366 spartin | (RefSeq) protein EARLY-RESPONSIVE TO DEHYDRATION 7, chloroplastic (A)	ko04144: Endocytosis	protein EARLY-RESPONSIVE TO DEHYDRATION 7, chloroplastic isoform X2 [Elaeis guineensis]	SDEH3_ARATH RecName: Full=Senescence/dehydration-associated protein At3g51250 {ECO:0000305};	A0A8N4F2Q6_ELAGV SubName: Full=protein EARLY-RESPONSIVE TO DEHYDRATION 7, chloroplastic isoform X2 {ECO:0000313|RefSeq:XP_029120063.1};	--	GO:0005886,plasma membrane; GO:0009506,plasmodesma; GO:0005575,cellular_component; GO:0016020,membrane; GO:0071944,cell periphery; GO:0110165,cellular anatomical entity; GO:0005911,cell-cell junction; GO:0030054,cell junction; GO:0055044,symplast; GO:0070161,anchoring junction	--	--	--	--
Cluster-100160.3	430	K19366 spartin | (RefSeq) protein EARLY-RESPONSIVE TO DEHYDRATION 7, chloroplastic (A)	ko04144: Endocytosis	hypothetical protein [Colocasia esculenta]	--	A0A843VZ30_COLES RecName: Full=Senescence domain-containing protein {ECO:0000259|Pfam:PF06911};	--	--	--	--	--	--
Cluster-100160.4	365	K19366 spartin | (RefSeq) protein EARLY-RESPONSIVE TO DEHYDRATION 7, chloroplastic (A)	ko04144: Endocytosis	hypothetical protein [Colocasia esculenta]	--	A0A843VZ30_COLES RecName: Full=Senescence domain-containing protein {ECO:0000259|Pfam:PF06911};	--	--	--	--	--	--
Cluster-100161.0	991	--	--	--	--	--	--	--	--	--	--	--
Cluster-100162.0	2310	K03878 NADH-ubiquinone oxidoreductase chain 1 [EC:7.1.1.2] | (RefSeq) nad1, OrsajM_p01; NADH dehydrogenase subunit 1 (A)	ko00190: Oxidative phosphorylation; ko01100: Metabolic pathways	orf192 [Phoenix dactylifera]	NU1M_OENBE RecName: Full=NADH-ubiquinone oxidoreductase chain 1; EC=7.1.1.2; AltName: Full=NADH dehydrogenase subunit 1;	G9HNV3_PHODC SubName: Full=Orf192 {ECO:0000313|EMBL:AEM43933.1};	NADH dehydrogenase subunit 1	GO:0016021,integral component of membrane; GO:0005743,mitochondrial inner membrane; GO:0070469,respirasome; GO:0008137,NADH dehydrogenase (ubiquinone) activity; GO:0003674,molecular_function; GO:0003824,catalytic activity; GO:0003954,NADH dehydrogenase activity; GO:0003955,NAD(P)H dehydrogenase (quinone) activity; GO:0009055,electron transfer activity; GO:0016491,oxidoreductase activity; GO:00166…	--	--	--	--
Cluster-100163.0	2060	K16732 Ase1/PRC1/MAP65 family protein | (RefSeq) 65-kDa microtubule-associated protein 1-like (A)	--	Integral membrane ankyrin-repeat protein Kidins220 (protein kinase D substrate) protein [Dioscorea alata]	XB33_ARATH RecName: Full=E3 ubiquitin-protein ligase XBAT33; EC=2.3.2.27; AltName: Full=Ankyrin repeat domain and RING finger-containing protein XBAT33; AltName: Full=Protein XB3 homolog 3; AltName: Full=RING-type E3 ubiquitin transferase XBAT33;	A0A8B7C4N7_PHODC SubName: Full=ankyrin-3-like {ECO:0000313|RefSeq:XP_008791721.2};	FOG: Ankyrin repeat	GO:0046872,metal ion binding; GO:0004842,ubiquitin-protein transferase activity; GO:0016567,protein ubiquitination; GO:0003674,molecular_function; GO:0005488,binding; GO:0043167,ion binding; GO:0043169,cation binding; GO:0003824,catalytic activity; GO:0016740,transferase activity; GO:0019787,ubiquitin-like protein transferase activity; GO:0140096,catalytic activity, acting on a protein; GO:000646…	Ankyrin repeats (3 copies)	--	--	--
Cluster-100163.1	300	--	--	ankyrin-2 [Asparagus officinalis]	--	A0A1R3L5B2_ASPOF SubName: Full=Uncharacterized protein {ECO:0000313|EMBL:ONK54804.1};	FOG: Ankyrin repeat	--	Ankyrin repeats (many copies)	--	--	--
Cluster-100163.2	390	K16732 Ase1/PRC1/MAP65 family protein | (RefSeq) 65-kDa microtubule-associated protein 1-like (A)	--	hypothetical protein Acr_07g0017420 [Actinidia rufa]	--	A0A7J0EZD5_9ERIC RecName: Full=Adenylate kinase {ECO:0000256|ARBA:ARBA00012955}; EC=2.7.4.3 {ECO:0000256|ARBA:ARBA00012955}; AltName: Full=ATP:AMP phosphotransferase {ECO:0000256|ARBA:ARBA00031517};	--	--	Ankyrin repeat	--	--	--
Cluster-100163.3	2776	K16732 Ase1/PRC1/MAP65 family protein | (RefSeq) 65-kDa microtubule-associated protein 1-like (A)	--	ankyrin-3-like [Dioscorea cayenensis subsp. rotundata]	XB33_ARATH RecName: Full=E3 ubiquitin-protein ligase XBAT33; EC=2.3.2.27; AltName: Full=Ankyrin repeat domain and RING finger-containing protein XBAT33; AltName: Full=Protein XB3 homolog 3; AltName: Full=RING-type E3 ubiquitin transferase XBAT33;	A0A8B7C4N7_PHODC SubName: Full=ankyrin-3-like {ECO:0000313|RefSeq:XP_008791721.2};	FOG: Ankyrin repeat	GO:0046872,metal ion binding; GO:0004842,ubiquitin-protein transferase activity; GO:0016567,protein ubiquitination; GO:0003674,molecular_function; GO:0005488,binding; GO:0043167,ion binding; GO:0043169,cation binding; GO:0003824,catalytic activity; GO:0016740,transferase activity; GO:0019787,ubiquitin-like protein transferase activity; GO:0140096,catalytic activity, acting on a protein; GO:000646…	Viral hemorrhagic septicemia virus non-virion protein	--	--	--
Cluster-100164.0	2030	K01728 pectate lyase [EC:4.2.2.2] | (RefSeq) probable pectate lyase 3 isoform X1 (A)	ko00040: Pentose and glucuronate interconversions; ko01100: Metabolic pathways	uncharacterized protein LOC109849992 [Asparagus officinalis]	--	A0A5P1EHM4_ASPOF SubName: Full=Uncharacterized protein {ECO:0000313|EMBL:ONK65284.1};	--	--	Putative small multi-drug export protein	--	--	--
Cluster-100165.0	632	--	--	--	--	--	--	--	--	--	--	--
Cluster-100166.0	1225	K12606 CCR4-NOT transcription complex subunit 9 | (RefSeq) cell differentiation protein RCD1 homolog (A)	ko03018: RNA degradation	CCR4-NOT transcription complex subunit 9 [Elaeis guineensis]	--	A0A6I9R319_ELAGV SubName: Full=CCR4-NOT transcription complex subunit 9 {ECO:0000313|RefSeq:XP_010918789.2};	--	--	--	Rcd1-like	TR	Rcd1-like
Cluster-100167.0	693	--	--	--	--	--	--	--	--	--	--	--
Cluster-100167.1	813	K24273 U2 small nuclear ribonucleoprotein auxiliary factor 35 kDa subunit-related protein | (RefSeq) zinc finger CCCH domain-containing protein 5 isoform X1 (A)	--	Zinc finger C-x8-C-x5-C-x3-H type family protein isoform 1 [Theobroma cacao]	C3H5_ARATH RecName: Full=Zinc finger CCCH domain-containing protein 5; Short=AtC3H5;	A0A061GFD0_THECC SubName: Full=Zinc finger C-x8-C-x5-C-x3-H type family protein isoform 1 {ECO:0000313|EMBL:EOY25724.1};	U2 snRNP splicing factor, small subunit, and related proteins	GO:0005681,spliceosomal complex; GO:0089701,U2AF complex; GO:0003677,DNA binding; GO:0046872,metal ion binding; GO:0030628,pre-mRNA 3'-splice site binding; GO:0000398,mRNA splicing, via spliceosome; GO:0003674,molecular_function; GO:0003676,nucleic acid binding; GO:0005488,binding; GO:0097159,organic cyclic compound binding; GO:1901363,heterocyclic compound binding; GO:0043167,ion binding; GO:004…	--	--	--	--
Cluster-100167.2	482	--	--	--	--	--	--	--	--	--	--	--
Cluster-100167.3	474	--	--	--	--	--	--	--	--	--	--	--
Cluster-100168.0	830	--	--	--	--	--	--	--	--	--	--	--
Cluster-100169.0	358	--	--	zinc finger protein STOP1 homolog [Asparagus officinalis]	--	A0A5P1E9B5_ASPOF RecName: Full=C2H2-type domain-containing protein {ECO:0000259|PROSITE:PS50157};	--	--	--	--	--	--
Cluster-100169.1	1862	K12309 beta-galactosidase [EC:3.2.1.23] | (Kazusa) Lj3g3v0323160.1; - (A)	ko00052: Galactose metabolism; ko00511: Other glycan degradation; ko00531: Glycosaminoglycan degradation; ko00600: Sphingolipid metabolism; ko00604: Glycosphingolipid biosynthesis - ganglio series; ko01100: Metabolic pathways	zinc finger protein STOP1 homolog [Asparagus officinalis]	STOP1_ORYSJ RecName: Full=Zinc finger protein STOP1 homolog; AltName: Full=Protein STOP1 homolog;	A0A5P1E9B5_ASPOF RecName: Full=C2H2-type domain-containing protein {ECO:0000259|PROSITE:PS50157};	FOG: Zn-finger	GO:0005634,nucleus; GO:0046872,metal ion binding; GO:0006355,regulation of transcription, DNA-templated; GO:0010447,response to acidic pH; GO:0010044,response to aluminum ion; GO:0003674,molecular_function; GO:0005488,binding; GO:0043167,ion binding; GO:0043169,cation binding; GO:0006139,nucleobase-containing compound metabolic process; GO:0006351,transcription, DNA-templated; GO:0006725,cellular…	Zinc finger, C2H2 type	C2H2	TF	C2H2
Cluster-100169.10	395	--	--	zinc finger protein STOP1 homolog [Asparagus officinalis]	STOP1_ORYSJ RecName: Full=Zinc finger protein STOP1 homolog; AltName: Full=Protein STOP1 homolog;	A0A5P1E9B5_ASPOF RecName: Full=C2H2-type domain-containing protein {ECO:0000259|PROSITE:PS50157};	FOG: Zn-finger	GO:0005634,nucleus; GO:0046872,metal ion binding; GO:0006355,regulation of transcription, DNA-templated; GO:0010447,response to acidic pH; GO:0010044,response to aluminum ion; GO:0003674,molecular_function; GO:0005488,binding; GO:0043167,ion binding; GO:0043169,cation binding; GO:0006139,nucleobase-containing compound metabolic process; GO:0006351,transcription, DNA-templated; GO:0006725,cellular…	--	--	--	--
Cluster-100169.11	1041	K12309 beta-galactosidase [EC:3.2.1.23] | (Kazusa) Lj3g3v0323160.1; - (A)	ko00052: Galactose metabolism; ko00511: Other glycan degradation; ko00531: Glycosaminoglycan degradation; ko00600: Sphingolipid metabolism; ko00604: Glycosphingolipid biosynthesis - ganglio series; ko01100: Metabolic pathways	zinc finger protein STOP1 homolog [Asparagus officinalis]	STOP1_ORYSJ RecName: Full=Zinc finger protein STOP1 homolog; AltName: Full=Protein STOP1 homolog;	A0A5P1E9B5_ASPOF RecName: Full=C2H2-type domain-containing protein {ECO:0000259|PROSITE:PS50157};	FOG: Zn-finger	GO:0005634,nucleus; GO:0046872,metal ion binding; GO:0006355,regulation of transcription, DNA-templated; GO:0010447,response to acidic pH; GO:0010044,response to aluminum ion; GO:0003674,molecular_function; GO:0005488,binding; GO:0043167,ion binding; GO:0043169,cation binding; GO:0006139,nucleobase-containing compound metabolic process; GO:0006351,transcription, DNA-templated; GO:0006725,cellular…	Zinc finger, C2H2 type	C2H2	TF	C2H2
Cluster-100169.12	489	--	--	zinc finger protein STOP1 homolog [Asparagus officinalis]	STOP1_ORYSJ RecName: Full=Zinc finger protein STOP1 homolog; AltName: Full=Protein STOP1 homolog;	A0A5P1E9B5_ASPOF RecName: Full=C2H2-type domain-containing protein {ECO:0000259|PROSITE:PS50157};	--	GO:0005634,nucleus; GO:0046872,metal ion binding; GO:0006355,regulation of transcription, DNA-templated; GO:0010447,response to acidic pH; GO:0010044,response to aluminum ion; GO:0003674,molecular_function; GO:0005488,binding; GO:0043167,ion binding; GO:0043169,cation binding; GO:0006139,nucleobase-containing compound metabolic process; GO:0006351,transcription, DNA-templated; GO:0006725,cellular…	--	--	--	--
Cluster-100169.13	360	--	--	--	--	--	--	--	--	--	--	--
Cluster-100169.2	1884	K12309 beta-galactosidase [EC:3.2.1.23] | (Kazusa) Lj3g3v0323160.1; - (A)	ko00052: Galactose metabolism; ko00511: Other glycan degradation; ko00531: Glycosaminoglycan degradation; ko00600: Sphingolipid metabolism; ko00604: Glycosphingolipid biosynthesis - ganglio series; ko01100: Metabolic pathways	zinc finger protein STOP1 homolog [Asparagus officinalis]	STOP1_ORYSJ RecName: Full=Zinc finger protein STOP1 homolog; AltName: Full=Protein STOP1 homolog;	A0A5P1E9B5_ASPOF RecName: Full=C2H2-type domain-containing protein {ECO:0000259|PROSITE:PS50157};	FOG: Zn-finger	GO:0005634,nucleus; GO:0046872,metal ion binding; GO:0006355,regulation of transcription, DNA-templated; GO:0010447,response to acidic pH; GO:0010044,response to aluminum ion; GO:0003674,molecular_function; GO:0005488,binding; GO:0043167,ion binding; GO:0043169,cation binding; GO:0006139,nucleobase-containing compound metabolic process; GO:0006351,transcription, DNA-templated; GO:0006725,cellular…	Zinc-finger double-stranded RNA-binding	C2H2	TF	C2H2
Cluster-100169.3	871	--	--	zinc finger protein STOP1 homolog [Asparagus officinalis]	STOP1_ORYSJ RecName: Full=Zinc finger protein STOP1 homolog; AltName: Full=Protein STOP1 homolog;	A0A5P1E9B5_ASPOF RecName: Full=C2H2-type domain-containing protein {ECO:0000259|PROSITE:PS50157};	FOG: Zn-finger	GO:0005634,nucleus; GO:0046872,metal ion binding; GO:0006355,regulation of transcription, DNA-templated; GO:0010447,response to acidic pH; GO:0010044,response to aluminum ion; GO:0003674,molecular_function; GO:0005488,binding; GO:0043167,ion binding; GO:0043169,cation binding; GO:0006139,nucleobase-containing compound metabolic process; GO:0006351,transcription, DNA-templated; GO:0006725,cellular…	--	--	--	--
Cluster-100169.4	965	--	--	zinc finger protein STOP1 homolog [Asparagus officinalis]	STOP1_ORYSJ RecName: Full=Zinc finger protein STOP1 homolog; AltName: Full=Protein STOP1 homolog;	A0A5P1E9B5_ASPOF RecName: Full=C2H2-type domain-containing protein {ECO:0000259|PROSITE:PS50157};	FOG: Zn-finger	GO:0005634,nucleus; GO:0046872,metal ion binding; GO:0006355,regulation of transcription, DNA-templated; GO:0010447,response to acidic pH; GO:0010044,response to aluminum ion; GO:0003674,molecular_function; GO:0005488,binding; GO:0043167,ion binding; GO:0043169,cation binding; GO:0006139,nucleobase-containing compound metabolic process; GO:0006351,transcription, DNA-templated; GO:0006725,cellular…	--	--	--	--
Cluster-100169.5	888	--	--	zinc finger protein STOP1 homolog [Asparagus officinalis]	STOP1_ORYSJ RecName: Full=Zinc finger protein STOP1 homolog; AltName: Full=Protein STOP1 homolog;	A0A5P1E9B5_ASPOF RecName: Full=C2H2-type domain-containing protein {ECO:0000259|PROSITE:PS50157};	FOG: Zn-finger	GO:0005634,nucleus; GO:0046872,metal ion binding; GO:0006355,regulation of transcription, DNA-templated; GO:0010447,response to acidic pH; GO:0010044,response to aluminum ion; GO:0003674,molecular_function; GO:0005488,binding; GO:0043167,ion binding; GO:0043169,cation binding; GO:0006139,nucleobase-containing compound metabolic process; GO:0006351,transcription, DNA-templated; GO:0006725,cellular…	--	--	--	--
Cluster-100169.6	1089	--	--	zinc finger protein STOP1 homolog [Asparagus officinalis]	STOP1_ORYSJ RecName: Full=Zinc finger protein STOP1 homolog; AltName: Full=Protein STOP1 homolog;	A0A5P1E9B5_ASPOF RecName: Full=C2H2-type domain-containing protein {ECO:0000259|PROSITE:PS50157};	FOG: Zn-finger	GO:0005634,nucleus; GO:0046872,metal ion binding; GO:0006355,regulation of transcription, DNA-templated; GO:0010447,response to acidic pH; GO:0010044,response to aluminum ion; GO:0003674,molecular_function; GO:0005488,binding; GO:0043167,ion binding; GO:0043169,cation binding; GO:0006139,nucleobase-containing compound metabolic process; GO:0006351,transcription, DNA-templated; GO:0006725,cellular…	--	--	--	--
Cluster-100169.7	1425	K12309 beta-galactosidase [EC:3.2.1.23] | (Kazusa) Lj3g3v0323160.1; - (A)	ko00052: Galactose metabolism; ko00511: Other glycan degradation; ko00531: Glycosaminoglycan degradation; ko00600: Sphingolipid metabolism; ko00604: Glycosphingolipid biosynthesis - ganglio series; ko01100: Metabolic pathways	zinc finger protein STOP1 homolog [Asparagus officinalis]	STOP1_ORYSJ RecName: Full=Zinc finger protein STOP1 homolog; AltName: Full=Protein STOP1 homolog;	A0A5P1E9B5_ASPOF RecName: Full=C2H2-type domain-containing protein {ECO:0000259|PROSITE:PS50157};	FOG: Zn-finger	GO:0005634,nucleus; GO:0046872,metal ion binding; GO:0006355,regulation of transcription, DNA-templated; GO:0010447,response to acidic pH; GO:0010044,response to aluminum ion; GO:0003674,molecular_function; GO:0005488,binding; GO:0043167,ion binding; GO:0043169,cation binding; GO:0006139,nucleobase-containing compound metabolic process; GO:0006351,transcription, DNA-templated; GO:0006725,cellular…	Zinc finger, C2H2 type	C2H2	TF	C2H2
Cluster-100169.8	1089	--	--	zinc finger protein STOP1 homolog [Asparagus officinalis]	STOP1_ORYSJ RecName: Full=Zinc finger protein STOP1 homolog; AltName: Full=Protein STOP1 homolog;	A0A5P1E9B5_ASPOF RecName: Full=C2H2-type domain-containing protein {ECO:0000259|PROSITE:PS50157};	FOG: Zn-finger	GO:0005634,nucleus; GO:0046872,metal ion binding; GO:0006355,regulation of transcription, DNA-templated; GO:0010447,response to acidic pH; GO:0010044,response to aluminum ion; GO:0003674,molecular_function; GO:0005488,binding; GO:0043167,ion binding; GO:0043169,cation binding; GO:0006139,nucleobase-containing compound metabolic process; GO:0006351,transcription, DNA-templated; GO:0006725,cellular…	--	--	--	--
Cluster-100169.9	871	--	--	zinc finger protein STOP1 homolog [Asparagus officinalis]	STOP1_ORYSJ RecName: Full=Zinc finger protein STOP1 homolog; AltName: Full=Protein STOP1 homolog;	A0A5P1E9B5_ASPOF RecName: Full=C2H2-type domain-containing protein {ECO:0000259|PROSITE:PS50157};	FOG: Zn-finger	GO:0005634,nucleus; GO:0046872,metal ion binding; GO:0006355,regulation of transcription, DNA-templated; GO:0010447,response to acidic pH; GO:0010044,response to aluminum ion; GO:0003674,molecular_function; GO:0005488,binding; GO:0043167,ion binding; GO:0043169,cation binding; GO:0006139,nucleobase-containing compound metabolic process; GO:0006351,transcription, DNA-templated; GO:0006725,cellular…	--	--	--	--
Cluster-10017.0	245	K15414 complement component 1 Q subcomponent-binding protein, mitochondrial | (RefSeq) uncharacterized protein At2g39795, mitochondrial-like (A)	--	uncharacterized protein At2g39795, mitochondrial-like [Phalaenopsis equestris]	--	--	--	--	--	--	--	--
Cluster-100170.0	1001	--	--	--	--	--	--	--	--	--	--	--
Cluster-100170.1	885	--	--	--	--	--	--	--	--	--	--	--
Cluster-100170.2	584	--	--	--	--	--	--	--	--	--	--	--
Cluster-100170.3	1138	--	--	--	--	--	--	--	--	--	--	--
Cluster-100171.0	567	--	--	--	--	--	--	--	--	--	--	--
Cluster-100172.0	524	--	--	hypothetical protein CXB51_001088 [Gossypium anomalum]	POLX_TOBAC RecName: Full=Retrovirus-related Pol polyprotein from transposon TNT 1-94; Includes: RecName: Full=Protease; EC=3.4.23.-; Includes: RecName: Full=Reverse transcriptase; EC=2.7.7.49; Includes: RecName: Full=Endonuclease;	A0A8J6DBL3_9ROSI RecName: Full=Integrase catalytic domain-containing protein {ECO:0000259|PROSITE:PS50994};	FOG: Transposon-encoded proteins with TYA, reverse transcriptase, integrase domains in various combinations	GO:0004190,aspartic-type endopeptidase activity; GO:0004519,endonuclease activity; GO:0003676,nucleic acid binding; GO:0003964,RNA-directed DNA polymerase activity; GO:0008270,zinc ion binding; GO:0015074,DNA integration; GO:0006508,proteolysis; GO:0003674,molecular_function; GO:0003824,catalytic activity; GO:0004175,endopeptidase activity; GO:0008233,peptidase activity; GO:0016787,hydrolase acti…	--	--	--	--
Cluster-100173.0	986	--	--	--	--	--	--	--	--	--	--	--
Cluster-100174.0	401	--	--	--	--	--	--	--	--	--	--	--
Cluster-100175.0	335	K18810 cyclin D1/2/4, plant | (RefSeq) cyclin-D2-1 (A)	--	cyclin-D2-1 [Asparagus officinalis]	CCD21_ORYSJ RecName: Full=Cyclin-D2-1; AltName: Full=G1/S-specific cyclin-D2-1; Short=CycD2;1;	A0A5P1FWL2_ASPOF RecName: Full=Cyclin N-terminal domain-containing protein {ECO:0000259|PROSITE:PS00292};	G1/S-specific cyclin D	GO:0000307,cyclin-dependent protein kinase holoenzyme complex; GO:0005737,cytoplasm; GO:0005634,nucleus; GO:0016538,cyclin-dependent protein serine/threonine kinase regulator activity; GO:0051301,cell division; GO:0044772,mitotic cell cycle phase transition; GO:0000079,regulation of cyclin-dependent protein serine/threonine kinase activity; GO:0003674,molecular_function; GO:0019207,kinase regulat…	--	--	--	--
Cluster-100175.1	905	K18810 cyclin D1/2/4, plant | (RefSeq) cyclin-D2-1 (A)	--	cyclin-D2-1 [Asparagus officinalis]	CCD21_ORYSJ RecName: Full=Cyclin-D2-1; AltName: Full=G1/S-specific cyclin-D2-1; Short=CycD2;1;	A0A5P1FWL2_ASPOF RecName: Full=Cyclin N-terminal domain-containing protein {ECO:0000259|PROSITE:PS00292};	G1/S-specific cyclin D	GO:0000307,cyclin-dependent protein kinase holoenzyme complex; GO:0005737,cytoplasm; GO:0005634,nucleus; GO:0016538,cyclin-dependent protein serine/threonine kinase regulator activity; GO:0051301,cell division; GO:0044772,mitotic cell cycle phase transition; GO:0000079,regulation of cyclin-dependent protein serine/threonine kinase activity; GO:0003674,molecular_function; GO:0019207,kinase regulat…	Cyclin, C-terminal domain	--	--	--
Cluster-100175.2	1711	K18810 cyclin D1/2/4, plant | (RefSeq) cyclin-D2-1 (A)	--	cyclin-D2-1 [Asparagus officinalis]	CCD21_ORYSJ RecName: Full=Cyclin-D2-1; AltName: Full=G1/S-specific cyclin-D2-1; Short=CycD2;1;	A0A5P1FWL2_ASPOF RecName: Full=Cyclin N-terminal domain-containing protein {ECO:0000259|PROSITE:PS00292};	G1/S-specific cyclin D	GO:0000307,cyclin-dependent protein kinase holoenzyme complex; GO:0005737,cytoplasm; GO:0005634,nucleus; GO:0016538,cyclin-dependent protein serine/threonine kinase regulator activity; GO:0051301,cell division; GO:0044772,mitotic cell cycle phase transition; GO:0000079,regulation of cyclin-dependent protein serine/threonine kinase activity; GO:0003674,molecular_function; GO:0019207,kinase regulat…	Cyclin, N-terminal domain	--	--	--
Cluster-100175.3	1713	K18810 cyclin D1/2/4, plant | (RefSeq) cyclin-D2-1 (A)	--	cyclin-D2-1 [Asparagus officinalis]	CCD21_ORYSJ RecName: Full=Cyclin-D2-1; AltName: Full=G1/S-specific cyclin-D2-1; Short=CycD2;1;	A0A5P1FWL2_ASPOF RecName: Full=Cyclin N-terminal domain-containing protein {ECO:0000259|PROSITE:PS00292};	G1/S-specific cyclin D	GO:0000307,cyclin-dependent protein kinase holoenzyme complex; GO:0005737,cytoplasm; GO:0005634,nucleus; GO:0016538,cyclin-dependent protein serine/threonine kinase regulator activity; GO:0051301,cell division; GO:0044772,mitotic cell cycle phase transition; GO:0000079,regulation of cyclin-dependent protein serine/threonine kinase activity; GO:0003674,molecular_function; GO:0019207,kinase regulat…	Cyclin, C-terminal domain	--	--	--
Cluster-100175.4	2312	K18810 cyclin D1/2/4, plant | (RefSeq) cyclin-D2-1 (A)	--	cyclin-D2-1 [Asparagus officinalis]	CCD21_ORYSJ RecName: Full=Cyclin-D2-1; AltName: Full=G1/S-specific cyclin-D2-1; Short=CycD2;1;	A0A5P1FWL2_ASPOF RecName: Full=Cyclin N-terminal domain-containing protein {ECO:0000259|PROSITE:PS00292};	G1/S-specific cyclin D	GO:0000307,cyclin-dependent protein kinase holoenzyme complex; GO:0005737,cytoplasm; GO:0005634,nucleus; GO:0016538,cyclin-dependent protein serine/threonine kinase regulator activity; GO:0051301,cell division; GO:0044772,mitotic cell cycle phase transition; GO:0000079,regulation of cyclin-dependent protein serine/threonine kinase activity; GO:0003674,molecular_function; GO:0019207,kinase regulat…	Cyclin, C-terminal domain	--	--	--
Cluster-100175.5	1670	K18810 cyclin D1/2/4, plant | (RefSeq) cyclin-D2-1 (A)	--	cyclin-D2-1 [Asparagus officinalis]	CCD21_ORYSJ RecName: Full=Cyclin-D2-1; AltName: Full=G1/S-specific cyclin-D2-1; Short=CycD2;1;	A0A5P1FWL2_ASPOF RecName: Full=Cyclin N-terminal domain-containing protein {ECO:0000259|PROSITE:PS00292};	G1/S-specific cyclin D	GO:0000307,cyclin-dependent protein kinase holoenzyme complex; GO:0005737,cytoplasm; GO:0005634,nucleus; GO:0016538,cyclin-dependent protein serine/threonine kinase regulator activity; GO:0051301,cell division; GO:0044772,mitotic cell cycle phase transition; GO:0000079,regulation of cyclin-dependent protein serine/threonine kinase activity; GO:0003674,molecular_function; GO:0019207,kinase regulat…	Cyclin, N-terminal domain	--	--	--
Cluster-100175.6	1176	K18810 cyclin D1/2/4, plant | (RefSeq) cyclin-D2-1 (A)	--	cyclin-D2-1 [Asparagus officinalis]	CCD21_ORYSJ RecName: Full=Cyclin-D2-1; AltName: Full=G1/S-specific cyclin-D2-1; Short=CycD2;1;	A0A5P1FWL2_ASPOF RecName: Full=Cyclin N-terminal domain-containing protein {ECO:0000259|PROSITE:PS00292};	G1/S-specific cyclin D	GO:0000307,cyclin-dependent protein kinase holoenzyme complex; GO:0005737,cytoplasm; GO:0005634,nucleus; GO:0016538,cyclin-dependent protein serine/threonine kinase regulator activity; GO:0051301,cell division; GO:0044772,mitotic cell cycle phase transition; GO:0000079,regulation of cyclin-dependent protein serine/threonine kinase activity; GO:0003674,molecular_function; GO:0019207,kinase regulat…	Cyclin, C-terminal domain	--	--	--
Cluster-100175.7	2296	K18810 cyclin D1/2/4, plant | (RefSeq) cyclin-D2-1 (A)	--	cyclin-D2-1 [Asparagus officinalis]	CCD21_ORYSJ RecName: Full=Cyclin-D2-1; AltName: Full=G1/S-specific cyclin-D2-1; Short=CycD2;1;	A0A5P1FWL2_ASPOF RecName: Full=Cyclin N-terminal domain-containing protein {ECO:0000259|PROSITE:PS00292};	G1/S-specific cyclin D	GO:0000307,cyclin-dependent protein kinase holoenzyme complex; GO:0005737,cytoplasm; GO:0005634,nucleus; GO:0016538,cyclin-dependent protein serine/threonine kinase regulator activity; GO:0051301,cell division; GO:0044772,mitotic cell cycle phase transition; GO:0000079,regulation of cyclin-dependent protein serine/threonine kinase activity; GO:0003674,molecular_function; GO:0019207,kinase regulat…	Cyclin, C-terminal domain	--	--	--
Cluster-100176.0	786	--	--	uncharacterized protein LOC119979787 [Tripterygium wilfordii]	--	A0A2I0X1H4_9ASPA SubName: Full=Retrovirus-related Pol polyprotein from transposon TNT 1-94 {ECO:0000313|EMBL:PKU81762.1};	--	--	--	--	--	--
Cluster-100177.0	835	--	--	--	--	--	--	--	--	--	--	--
Cluster-100178.0	1292	K14765 U3 small nucleolar ribonucleoprotein protein LCP5 | (RefSeq) neuroguidin (A)	--	neuroguidin [Asparagus officinalis]	THAL_ARATH RecName: Full=Protein THALLO {ECO:0000303|PubMed:27792779}; AltName: Full=Protein EMBRYO DEFECTIVE 2777 {ECO:0000303|PubMed:15266054};	A0A5P1EJY1_ASPOF SubName: Full=Uncharacterized protein {ECO:0000313|EMBL:ONK66295.1};	Protein involved in rRNA processing	GO:0005730,nucleolus; GO:0032040,small-subunit processome; GO:0003723,RNA binding; GO:0006325,chromatin organization; GO:0000462,maturation of SSU-rRNA from tricistronic rRNA transcript (SSU-rRNA, 5.8S rRNA, LSU-rRNA); GO:0006364,rRNA processing; GO:0003674,molecular_function; GO:0003676,nucleic acid binding; GO:0005488,binding; GO:0097159,organic cyclic compound binding; GO:1901363,heterocyclic …	Sas10/Utp3/C1D family	--	--	--
Cluster-100178.1	1390	K14765 U3 small nucleolar ribonucleoprotein protein LCP5 | (RefSeq) neuroguidin (A)	--	neuroguidin [Asparagus officinalis]	THAL_ARATH RecName: Full=Protein THALLO {ECO:0000303|PubMed:27792779}; AltName: Full=Protein EMBRYO DEFECTIVE 2777 {ECO:0000303|PubMed:15266054};	A0A5P1EJY1_ASPOF SubName: Full=Uncharacterized protein {ECO:0000313|EMBL:ONK66295.1};	Protein involved in rRNA processing	GO:0005730,nucleolus; GO:0032040,small-subunit processome; GO:0003723,RNA binding; GO:0006325,chromatin organization; GO:0000462,maturation of SSU-rRNA from tricistronic rRNA transcript (SSU-rRNA, 5.8S rRNA, LSU-rRNA); GO:0006364,rRNA processing; GO:0003674,molecular_function; GO:0003676,nucleic acid binding; GO:0005488,binding; GO:0097159,organic cyclic compound binding; GO:1901363,heterocyclic …	Sas10/Utp3/C1D family	--	--	--
Cluster-100178.2	532	K14765 U3 small nucleolar ribonucleoprotein protein LCP5 | (RefSeq) neuroguidin (A)	--	neuroguidin [Asparagus officinalis]	THAL_ARATH RecName: Full=Protein THALLO {ECO:0000303|PubMed:27792779}; AltName: Full=Protein EMBRYO DEFECTIVE 2777 {ECO:0000303|PubMed:15266054};	A0A5P1EJY1_ASPOF SubName: Full=Uncharacterized protein {ECO:0000313|EMBL:ONK66295.1};	Protein involved in rRNA processing	GO:0005730,nucleolus; GO:0032040,small-subunit processome; GO:0003723,RNA binding; GO:0006325,chromatin organization; GO:0000462,maturation of SSU-rRNA from tricistronic rRNA transcript (SSU-rRNA, 5.8S rRNA, LSU-rRNA); GO:0006364,rRNA processing; GO:0003674,molecular_function; GO:0003676,nucleic acid binding; GO:0005488,binding; GO:0097159,organic cyclic compound binding; GO:1901363,heterocyclic …	Sas10/Utp3/C1D family	--	--	--
Cluster-100178.3	1564	K14765 U3 small nucleolar ribonucleoprotein protein LCP5 | (RefSeq) neuroguidin (A)	--	neuroguidin [Asparagus officinalis]	THAL_ARATH RecName: Full=Protein THALLO {ECO:0000303|PubMed:27792779}; AltName: Full=Protein EMBRYO DEFECTIVE 2777 {ECO:0000303|PubMed:15266054};	A0A5P1EJY1_ASPOF SubName: Full=Uncharacterized protein {ECO:0000313|EMBL:ONK66295.1};	Protein involved in rRNA processing	GO:0005730,nucleolus; GO:0032040,small-subunit processome; GO:0003723,RNA binding; GO:0006325,chromatin organization; GO:0000462,maturation of SSU-rRNA from tricistronic rRNA transcript (SSU-rRNA, 5.8S rRNA, LSU-rRNA); GO:0006364,rRNA processing; GO:0003674,molecular_function; GO:0003676,nucleic acid binding; GO:0005488,binding; GO:0097159,organic cyclic compound binding; GO:1901363,heterocyclic …	--	--	--	--
Cluster-100179.0	511	--	--	PREDICTED: uncharacterized protein LOC107792746 [Nicotiana tabacum]	PCP13_ARATH RecName: Full=Precursor of CEP13 {ECO:0000303|PubMed:24179096}; Short=PCEP13 {ECO:0000303|PubMed:24179096}; Contains: RecName: Full=C-terminally encoded peptide 13 {ECO:0000303|PubMed:24179096}; Short=CEP13 {ECO:0000303|PubMed:24179096}; Flags: Precursor;	A0A1S4A1A9_TOBAC SubName: Full=uncharacterized protein LOC107792746 {ECO:0000313|RefSeq:XP_016470462.1};	--	GO:0048046,apoplast; GO:0005179,hormone activity; GO:0006995,cellular response to nitrogen starvation; GO:1902025,nitrate import; GO:2000280,regulation of root development; GO:0060359,response to ammonium ion; GO:0009739,response to gibberellin; GO:0090548,response to nitrate starvation; GO:1901698,response to nitrogen compound; GO:0006970,response to osmotic stress; GO:0003674,molecular_function…	--	--	--	--
Cluster-100179.1	508	--	--	PREDICTED: uncharacterized protein LOC107792746 [Nicotiana tabacum]	PCP13_ARATH RecName: Full=Precursor of CEP13 {ECO:0000303|PubMed:24179096}; Short=PCEP13 {ECO:0000303|PubMed:24179096}; Contains: RecName: Full=C-terminally encoded peptide 13 {ECO:0000303|PubMed:24179096}; Short=CEP13 {ECO:0000303|PubMed:24179096}; Flags: Precursor;	A0A1S4A1A9_TOBAC SubName: Full=uncharacterized protein LOC107792746 {ECO:0000313|RefSeq:XP_016470462.1};	--	GO:0048046,apoplast; GO:0005179,hormone activity; GO:0006995,cellular response to nitrogen starvation; GO:1902025,nitrate import; GO:2000280,regulation of root development; GO:0060359,response to ammonium ion; GO:0009739,response to gibberellin; GO:0090548,response to nitrate starvation; GO:1901698,response to nitrogen compound; GO:0006970,response to osmotic stress; GO:0003674,molecular_function…	--	--	--	--
Cluster-100179.2	557	--	--	PREDICTED: uncharacterized protein LOC107792746 [Nicotiana tabacum]	PCP13_ARATH RecName: Full=Precursor of CEP13 {ECO:0000303|PubMed:24179096}; Short=PCEP13 {ECO:0000303|PubMed:24179096}; Contains: RecName: Full=C-terminally encoded peptide 13 {ECO:0000303|PubMed:24179096}; Short=CEP13 {ECO:0000303|PubMed:24179096}; Flags: Precursor;	A0A1S4A1A9_TOBAC SubName: Full=uncharacterized protein LOC107792746 {ECO:0000313|RefSeq:XP_016470462.1};	--	GO:0048046,apoplast; GO:0005179,hormone activity; GO:0006995,cellular response to nitrogen starvation; GO:1902025,nitrate import; GO:2000280,regulation of root development; GO:0060359,response to ammonium ion; GO:0009739,response to gibberellin; GO:0090548,response to nitrate starvation; GO:1901698,response to nitrogen compound; GO:0006970,response to osmotic stress; GO:0003674,molecular_function…	--	--	--	--
Cluster-100179.3	493	--	--	unnamed protein product [Spirodela intermedia]	PCP13_ARATH RecName: Full=Precursor of CEP13 {ECO:0000303|PubMed:24179096}; Short=PCEP13 {ECO:0000303|PubMed:24179096}; Contains: RecName: Full=C-terminally encoded peptide 13 {ECO:0000303|PubMed:24179096}; Short=CEP13 {ECO:0000303|PubMed:24179096}; Flags: Precursor;	A0A7I8KYH5_SPIIN SubName: Full=Hypothetical protein {ECO:0000313|EMBL:CAA7402386.1};	--	GO:0048046,apoplast; GO:0005179,hormone activity; GO:0006995,cellular response to nitrogen starvation; GO:1902025,nitrate import; GO:2000280,regulation of root development; GO:0060359,response to ammonium ion; GO:0009739,response to gibberellin; GO:0090548,response to nitrate starvation; GO:1901698,response to nitrogen compound; GO:0006970,response to osmotic stress; GO:0003674,molecular_function…	--	--	--	--
Cluster-10018.0	444	--	--	--	--	--	--	--	--	--	--	--
Cluster-100180.0	485	--	--	--	--	--	--	--	--	--	--	--
Cluster-100181.0	718	--	--	uncharacterized protein LOC109830689 [Asparagus officinalis]	--	A0A5P1FMW9_ASPOF SubName: Full=Uncharacterized protein {ECO:0000313|EMBL:ONK77970.1};	--	--	--	--	--	--
Cluster-100182.0	632	--	--	--	--	--	--	--	--	--	--	--
Cluster-100183.0	1061	--	--	--	--	--	--	--	--	--	--	--
Cluster-100184.0	1957	--	--	--	--	--	--	--	--	--	--	--
Cluster-100185.0	1343	--	--	--	--	--	--	--	--	--	--	--
Cluster-100186.0	952	--	--	--	--	--	--	--	--	--	--	--
Cluster-100187.0	435	--	--	--	--	--	--	--	--	--	--	--
Cluster-100188.0	649	K17609 nucleoredoxin [EC:1.8.1.8] | (RefSeq) probable nucleoredoxin 1 (A)	--	probable nucleoredoxin 1 [Asparagus officinalis]	NRX1_ARATH RecName: Full=Probable nucleoredoxin 1; Short=AtNrx1; EC=1.8.1.8;	A0A8B7C6L6_PHODC SubName: Full=probable nucleoredoxin 1 {ECO:0000313|RefSeq:XP_008792848.2};	Thioredoxin, nucleoredoxin and related proteins	GO:0005829,cytosol; GO:0005634,nucleus; GO:0004791,thioredoxin-disulfide reductase activity; GO:0009860,pollen tube growth; GO:0010183,pollen tube guidance; GO:0080092,regulation of pollen tube growth; GO:0003674,molecular_function; GO:0003824,catalytic activity; GO:0015036,disulfide oxidoreductase activity; GO:0016209,antioxidant activity; GO:0016491,oxidoreductase activity; GO:0016651,oxidoredu…	Thioredoxin-like	--	--	--
Cluster-100188.1	3246	K17609 nucleoredoxin [EC:1.8.1.8] | (RefSeq) probable nucleoredoxin 1 (A)	--	probable nucleoredoxin 1 [Asparagus officinalis]	NRX1_ARATH RecName: Full=Probable nucleoredoxin 1; Short=AtNrx1; EC=1.8.1.8;	A0A8B7C6L6_PHODC SubName: Full=probable nucleoredoxin 1 {ECO:0000313|RefSeq:XP_008792848.2};	Thioredoxin, nucleoredoxin and related proteins	GO:0005829,cytosol; GO:0005634,nucleus; GO:0004791,thioredoxin-disulfide reductase activity; GO:0009860,pollen tube growth; GO:0010183,pollen tube guidance; GO:0080092,regulation of pollen tube growth; GO:0003674,molecular_function; GO:0003824,catalytic activity; GO:0015036,disulfide oxidoreductase activity; GO:0016209,antioxidant activity; GO:0016491,oxidoreductase activity; GO:0016651,oxidoredu…	Thioredoxin-like	--	--	--
Cluster-100188.10	1220	K17609 nucleoredoxin [EC:1.8.1.8] | (RefSeq) probable nucleoredoxin 1 (A)	--	probable nucleoredoxin 1 [Asparagus officinalis]	NRX1_ARATH RecName: Full=Probable nucleoredoxin 1; Short=AtNrx1; EC=1.8.1.8;	A0A8B7C6L6_PHODC SubName: Full=probable nucleoredoxin 1 {ECO:0000313|RefSeq:XP_008792848.2};	Thioredoxin, nucleoredoxin and related proteins	GO:0005829,cytosol; GO:0005634,nucleus; GO:0004791,thioredoxin-disulfide reductase activity; GO:0009860,pollen tube growth; GO:0010183,pollen tube guidance; GO:0080092,regulation of pollen tube growth; GO:0003674,molecular_function; GO:0003824,catalytic activity; GO:0015036,disulfide oxidoreductase activity; GO:0016209,antioxidant activity; GO:0016491,oxidoreductase activity; GO:0016651,oxidoredu…	Thioredoxin-like	--	--	--
Cluster-100188.11	3246	K17609 nucleoredoxin [EC:1.8.1.8] | (RefSeq) probable nucleoredoxin 1 (A)	--	probable nucleoredoxin 1 [Asparagus officinalis]	NRX1_ARATH RecName: Full=Probable nucleoredoxin 1; Short=AtNrx1; EC=1.8.1.8;	A0A8B7C6L6_PHODC SubName: Full=probable nucleoredoxin 1 {ECO:0000313|RefSeq:XP_008792848.2};	Thioredoxin, nucleoredoxin and related proteins	GO:0005829,cytosol; GO:0005634,nucleus; GO:0004791,thioredoxin-disulfide reductase activity; GO:0009860,pollen tube growth; GO:0010183,pollen tube guidance; GO:0080092,regulation of pollen tube growth; GO:0003674,molecular_function; GO:0003824,catalytic activity; GO:0015036,disulfide oxidoreductase activity; GO:0016209,antioxidant activity; GO:0016491,oxidoreductase activity; GO:0016651,oxidoredu…	Thioredoxin-like	--	--	--
Cluster-100188.12	777	K17609 nucleoredoxin [EC:1.8.1.8] | (RefSeq) probable nucleoredoxin 1 (A)	--	probable nucleoredoxin 1 [Phoenix dactylifera]	NRX1_ARATH RecName: Full=Probable nucleoredoxin 1; Short=AtNrx1; EC=1.8.1.8;	A0A8B7C6L6_PHODC SubName: Full=probable nucleoredoxin 1 {ECO:0000313|RefSeq:XP_008792848.2};	Thioredoxin, nucleoredoxin and related proteins	GO:0005829,cytosol; GO:0005634,nucleus; GO:0004791,thioredoxin-disulfide reductase activity; GO:0009860,pollen tube growth; GO:0010183,pollen tube guidance; GO:0080092,regulation of pollen tube growth; GO:0003674,molecular_function; GO:0003824,catalytic activity; GO:0015036,disulfide oxidoreductase activity; GO:0016209,antioxidant activity; GO:0016491,oxidoreductase activity; GO:0016651,oxidoredu…	C1 domain	--	--	--
Cluster-100188.13	723	K17609 nucleoredoxin [EC:1.8.1.8] | (RefSeq) probable nucleoredoxin 1 (A)	--	PREDICTED: probable nucleoredoxin 1 [Vitis vinifera]	NRX1_ARATH RecName: Full=Probable nucleoredoxin 1; Short=AtNrx1; EC=1.8.1.8;	F6HHV1_VITVI RecName: Full=C1_2 domain-containing protein {ECO:0000259|Pfam:PF03107};	Thioredoxin, nucleoredoxin and related proteins	GO:0005829,cytosol; GO:0005634,nucleus; GO:0004791,thioredoxin-disulfide reductase activity; GO:0009860,pollen tube growth; GO:0010183,pollen tube guidance; GO:0080092,regulation of pollen tube growth; GO:0003674,molecular_function; GO:0003824,catalytic activity; GO:0015036,disulfide oxidoreductase activity; GO:0016209,antioxidant activity; GO:0016491,oxidoreductase activity; GO:0016651,oxidoredu…	C1 domain	--	--	--
Cluster-100188.14	1113	K17609 nucleoredoxin [EC:1.8.1.8] | (RefSeq) probable nucleoredoxin 1 (A)	--	probable nucleoredoxin 1 [Phoenix dactylifera]	NRX1_ARATH RecName: Full=Probable nucleoredoxin 1; Short=AtNrx1; EC=1.8.1.8;	A0A8B7C6L6_PHODC SubName: Full=probable nucleoredoxin 1 {ECO:0000313|RefSeq:XP_008792848.2};	Thioredoxin, nucleoredoxin and related proteins	GO:0005829,cytosol; GO:0005634,nucleus; GO:0004791,thioredoxin-disulfide reductase activity; GO:0009860,pollen tube growth; GO:0010183,pollen tube guidance; GO:0080092,regulation of pollen tube growth; GO:0003674,molecular_function; GO:0003824,catalytic activity; GO:0015036,disulfide oxidoreductase activity; GO:0016209,antioxidant activity; GO:0016491,oxidoreductase activity; GO:0016651,oxidoredu…	Thioredoxin-like	--	--	--
Cluster-100188.15	1065	K17609 nucleoredoxin [EC:1.8.1.8] | (RefSeq) probable nucleoredoxin 1 (A)	--	probable nucleoredoxin 1 [Phoenix dactylifera]	NRX1_ARATH RecName: Full=Probable nucleoredoxin 1; Short=AtNrx1; EC=1.8.1.8;	A0A8B7C6L6_PHODC SubName: Full=probable nucleoredoxin 1 {ECO:0000313|RefSeq:XP_008792848.2};	Thioredoxin, nucleoredoxin and related proteins	GO:0005829,cytosol; GO:0005634,nucleus; GO:0004791,thioredoxin-disulfide reductase activity; GO:0009860,pollen tube growth; GO:0010183,pollen tube guidance; GO:0080092,regulation of pollen tube growth; GO:0003674,molecular_function; GO:0003824,catalytic activity; GO:0015036,disulfide oxidoreductase activity; GO:0016209,antioxidant activity; GO:0016491,oxidoreductase activity; GO:0016651,oxidoredu…	Thioredoxin-like	--	--	--
Cluster-100188.16	1113	K17609 nucleoredoxin [EC:1.8.1.8] | (RefSeq) probable nucleoredoxin 1 (A)	--	probable nucleoredoxin 1 [Phoenix dactylifera]	NRX1_ARATH RecName: Full=Probable nucleoredoxin 1; Short=AtNrx1; EC=1.8.1.8;	A0A8B7C6L6_PHODC SubName: Full=probable nucleoredoxin 1 {ECO:0000313|RefSeq:XP_008792848.2};	Thioredoxin, nucleoredoxin and related proteins	GO:0005829,cytosol; GO:0005634,nucleus; GO:0004791,thioredoxin-disulfide reductase activity; GO:0009860,pollen tube growth; GO:0010183,pollen tube guidance; GO:0080092,regulation of pollen tube growth; GO:0003674,molecular_function; GO:0003824,catalytic activity; GO:0015036,disulfide oxidoreductase activity; GO:0016209,antioxidant activity; GO:0016491,oxidoreductase activity; GO:0016651,oxidoredu…	Thioredoxin-like	--	--	--
Cluster-100188.17	1065	K17609 nucleoredoxin [EC:1.8.1.8] | (RefSeq) probable nucleoredoxin 1 (A)	--	probable nucleoredoxin 1 [Phoenix dactylifera]	NRX1_ARATH RecName: Full=Probable nucleoredoxin 1; Short=AtNrx1; EC=1.8.1.8;	A0A8B7C6L6_PHODC SubName: Full=probable nucleoredoxin 1 {ECO:0000313|RefSeq:XP_008792848.2};	Thioredoxin, nucleoredoxin and related proteins	GO:0005829,cytosol; GO:0005634,nucleus; GO:0004791,thioredoxin-disulfide reductase activity; GO:0009860,pollen tube growth; GO:0010183,pollen tube guidance; GO:0080092,regulation of pollen tube growth; GO:0003674,molecular_function; GO:0003824,catalytic activity; GO:0015036,disulfide oxidoreductase activity; GO:0016209,antioxidant activity; GO:0016491,oxidoreductase activity; GO:0016651,oxidoredu…	Thioredoxin-like	--	--	--
Cluster-100188.18	1098	K17609 nucleoredoxin [EC:1.8.1.8] | (RefSeq) probable nucleoredoxin 1 (A)	--	probable nucleoredoxin 1 [Phoenix dactylifera]	NRX1_ARATH RecName: Full=Probable nucleoredoxin 1; Short=AtNrx1; EC=1.8.1.8;	A0A8B7C6L6_PHODC SubName: Full=probable nucleoredoxin 1 {ECO:0000313|RefSeq:XP_008792848.2};	Thioredoxin, nucleoredoxin and related proteins	GO:0005829,cytosol; GO:0005634,nucleus; GO:0004791,thioredoxin-disulfide reductase activity; GO:0009860,pollen tube growth; GO:0010183,pollen tube guidance; GO:0080092,regulation of pollen tube growth; GO:0003674,molecular_function; GO:0003824,catalytic activity; GO:0015036,disulfide oxidoreductase activity; GO:0016209,antioxidant activity; GO:0016491,oxidoreductase activity; GO:0016651,oxidoredu…	Thioredoxin-like	--	--	--
Cluster-100188.19	1098	K17609 nucleoredoxin [EC:1.8.1.8] | (RefSeq) probable nucleoredoxin 1 (A)	--	probable nucleoredoxin 1 [Phoenix dactylifera]	NRX1_ARATH RecName: Full=Probable nucleoredoxin 1; Short=AtNrx1; EC=1.8.1.8;	A0A8B7C6L6_PHODC SubName: Full=probable nucleoredoxin 1 {ECO:0000313|RefSeq:XP_008792848.2};	Thioredoxin, nucleoredoxin and related proteins	GO:0005829,cytosol; GO:0005634,nucleus; GO:0004791,thioredoxin-disulfide reductase activity; GO:0009860,pollen tube growth; GO:0010183,pollen tube guidance; GO:0080092,regulation of pollen tube growth; GO:0003674,molecular_function; GO:0003824,catalytic activity; GO:0015036,disulfide oxidoreductase activity; GO:0016209,antioxidant activity; GO:0016491,oxidoreductase activity; GO:0016651,oxidoredu…	Thioredoxin-like	--	--	--
Cluster-100188.2	1113	K17609 nucleoredoxin [EC:1.8.1.8] | (RefSeq) probable nucleoredoxin 1 (A)	--	probable nucleoredoxin 1 [Phoenix dactylifera]	NRX1_ARATH RecName: Full=Probable nucleoredoxin 1; Short=AtNrx1; EC=1.8.1.8;	A0A8B7C6L6_PHODC SubName: Full=probable nucleoredoxin 1 {ECO:0000313|RefSeq:XP_008792848.2};	Thioredoxin, nucleoredoxin and related proteins	GO:0005829,cytosol; GO:0005634,nucleus; GO:0004791,thioredoxin-disulfide reductase activity; GO:0009860,pollen tube growth; GO:0010183,pollen tube guidance; GO:0080092,regulation of pollen tube growth; GO:0003674,molecular_function; GO:0003824,catalytic activity; GO:0015036,disulfide oxidoreductase activity; GO:0016209,antioxidant activity; GO:0016491,oxidoreductase activity; GO:0016651,oxidoredu…	Thioredoxin-like	--	--	--
Cluster-100188.20	794	K17609 nucleoredoxin [EC:1.8.1.8] | (RefSeq) probable nucleoredoxin 1 (A)	--	probable nucleoredoxin 1 [Asparagus officinalis]	NRX1_ARATH RecName: Full=Probable nucleoredoxin 1; Short=AtNrx1; EC=1.8.1.8;	A0A8B7C6L6_PHODC SubName: Full=probable nucleoredoxin 1 {ECO:0000313|RefSeq:XP_008792848.2};	Thioredoxin, nucleoredoxin and related proteins	GO:0005829,cytosol; GO:0005634,nucleus; GO:0004791,thioredoxin-disulfide reductase activity; GO:0009860,pollen tube growth; GO:0010183,pollen tube guidance; GO:0080092,regulation of pollen tube growth; GO:0003674,molecular_function; GO:0003824,catalytic activity; GO:0015036,disulfide oxidoreductase activity; GO:0016209,antioxidant activity; GO:0016491,oxidoreductase activity; GO:0016651,oxidoredu…	Thioredoxin-like	--	--	--
Cluster-100188.21	381	K17609 nucleoredoxin [EC:1.8.1.8] | (RefSeq) probable nucleoredoxin 1 (A)	--	probable nucleoredoxin 1 [Asparagus officinalis]	NRX1_ARATH RecName: Full=Probable nucleoredoxin 1; Short=AtNrx1; EC=1.8.1.8;	A0A8N4ID39_ELAGV SubName: Full=probable nucleoredoxin 1 {ECO:0000313|RefSeq:XP_029119459.1};	Thioredoxin, nucleoredoxin and related proteins	GO:0005829,cytosol; GO:0005634,nucleus; GO:0004791,thioredoxin-disulfide reductase activity; GO:0009860,pollen tube growth; GO:0010183,pollen tube guidance; GO:0080092,regulation of pollen tube growth; GO:0003674,molecular_function; GO:0003824,catalytic activity; GO:0015036,disulfide oxidoreductase activity; GO:0016209,antioxidant activity; GO:0016491,oxidoreductase activity; GO:0016651,oxidoredu…	Thioredoxin-like	--	--	--
Cluster-100188.22	516	K17609 nucleoredoxin [EC:1.8.1.8] | (RefSeq) probable nucleoredoxin 1 (A)	--	probable nucleoredoxin 1 [Asparagus officinalis]	NRX1_ARATH RecName: Full=Probable nucleoredoxin 1; Short=AtNrx1; EC=1.8.1.8;	A0A8N4ID39_ELAGV SubName: Full=probable nucleoredoxin 1 {ECO:0000313|RefSeq:XP_029119459.1};	Thioredoxin, nucleoredoxin and related proteins	GO:0005829,cytosol; GO:0005634,nucleus; GO:0004791,thioredoxin-disulfide reductase activity; GO:0009860,pollen tube growth; GO:0010183,pollen tube guidance; GO:0080092,regulation of pollen tube growth; GO:0003674,molecular_function; GO:0003824,catalytic activity; GO:0015036,disulfide oxidoreductase activity; GO:0016209,antioxidant activity; GO:0016491,oxidoreductase activity; GO:0016651,oxidoredu…	Thioredoxin-like	--	--	--
Cluster-100188.23	772	K17609 nucleoredoxin [EC:1.8.1.8] | (RefSeq) probable nucleoredoxin 1 (A)	--	probable nucleoredoxin 1 [Asparagus officinalis]	NRX1_ARATH RecName: Full=Probable nucleoredoxin 1; Short=AtNrx1; EC=1.8.1.8;	A0A8B7C6L6_PHODC SubName: Full=probable nucleoredoxin 1 {ECO:0000313|RefSeq:XP_008792848.2};	Thioredoxin, nucleoredoxin and related proteins	GO:0005829,cytosol; GO:0005634,nucleus; GO:0004791,thioredoxin-disulfide reductase activity; GO:0009860,pollen tube growth; GO:0010183,pollen tube guidance; GO:0080092,regulation of pollen tube growth; GO:0003674,molecular_function; GO:0003824,catalytic activity; GO:0015036,disulfide oxidoreductase activity; GO:0016209,antioxidant activity; GO:0016491,oxidoreductase activity; GO:0016651,oxidoredu…	--	--	--	--
Cluster-100188.3	1220	K17609 nucleoredoxin [EC:1.8.1.8] | (RefSeq) probable nucleoredoxin 1 (A)	--	probable nucleoredoxin 1 [Asparagus officinalis]	NRX1_ARATH RecName: Full=Probable nucleoredoxin 1; Short=AtNrx1; EC=1.8.1.8;	A0A8B7C6L6_PHODC SubName: Full=probable nucleoredoxin 1 {ECO:0000313|RefSeq:XP_008792848.2};	Thioredoxin, nucleoredoxin and related proteins	GO:0005829,cytosol; GO:0005634,nucleus; GO:0004791,thioredoxin-disulfide reductase activity; GO:0009860,pollen tube growth; GO:0010183,pollen tube guidance; GO:0080092,regulation of pollen tube growth; GO:0003674,molecular_function; GO:0003824,catalytic activity; GO:0015036,disulfide oxidoreductase activity; GO:0016209,antioxidant activity; GO:0016491,oxidoreductase activity; GO:0016651,oxidoredu…	Thioredoxin-like	--	--	--
Cluster-100188.4	1220	K17609 nucleoredoxin [EC:1.8.1.8] | (RefSeq) probable nucleoredoxin 1 (A)	--	probable nucleoredoxin 1 [Asparagus officinalis]	NRX1_ARATH RecName: Full=Probable nucleoredoxin 1; Short=AtNrx1; EC=1.8.1.8;	A0A8B7C6L6_PHODC SubName: Full=probable nucleoredoxin 1 {ECO:0000313|RefSeq:XP_008792848.2};	Thioredoxin, nucleoredoxin and related proteins	GO:0005829,cytosol; GO:0005634,nucleus; GO:0004791,thioredoxin-disulfide reductase activity; GO:0009860,pollen tube growth; GO:0010183,pollen tube guidance; GO:0080092,regulation of pollen tube growth; GO:0003674,molecular_function; GO:0003824,catalytic activity; GO:0015036,disulfide oxidoreductase activity; GO:0016209,antioxidant activity; GO:0016491,oxidoreductase activity; GO:0016651,oxidoredu…	Thioredoxin-like	--	--	--
Cluster-100188.5	381	K17609 nucleoredoxin [EC:1.8.1.8] | (RefSeq) probable nucleoredoxin 1 (A)	--	probable nucleoredoxin 1 [Asparagus officinalis]	NRX1_ARATH RecName: Full=Probable nucleoredoxin 1; Short=AtNrx1; EC=1.8.1.8;	A0A8N4ID39_ELAGV SubName: Full=probable nucleoredoxin 1 {ECO:0000313|RefSeq:XP_029119459.1};	Thioredoxin, nucleoredoxin and related proteins	GO:0005829,cytosol; GO:0005634,nucleus; GO:0004791,thioredoxin-disulfide reductase activity; GO:0009860,pollen tube growth; GO:0010183,pollen tube guidance; GO:0080092,regulation of pollen tube growth; GO:0003674,molecular_function; GO:0003824,catalytic activity; GO:0015036,disulfide oxidoreductase activity; GO:0016209,antioxidant activity; GO:0016491,oxidoreductase activity; GO:0016651,oxidoredu…	Thioredoxin-like	--	--	--
Cluster-100188.6	1176	K17609 nucleoredoxin [EC:1.8.1.8] | (RefSeq) probable nucleoredoxin 1 (A)	--	probable nucleoredoxin 1 [Asparagus officinalis]	NRX1_ARATH RecName: Full=Probable nucleoredoxin 1; Short=AtNrx1; EC=1.8.1.8;	A0A8B7C6L6_PHODC SubName: Full=probable nucleoredoxin 1 {ECO:0000313|RefSeq:XP_008792848.2};	Thioredoxin, nucleoredoxin and related proteins	GO:0005829,cytosol; GO:0005634,nucleus; GO:0004791,thioredoxin-disulfide reductase activity; GO:0009860,pollen tube growth; GO:0010183,pollen tube guidance; GO:0080092,regulation of pollen tube growth; GO:0003674,molecular_function; GO:0003824,catalytic activity; GO:0015036,disulfide oxidoreductase activity; GO:0016209,antioxidant activity; GO:0016491,oxidoreductase activity; GO:0016651,oxidoredu…	Thioredoxin-like	--	--	--
Cluster-100188.7	1220	K17609 nucleoredoxin [EC:1.8.1.8] | (RefSeq) probable nucleoredoxin 1 (A)	--	probable nucleoredoxin 1 [Asparagus officinalis]	NRX1_ARATH RecName: Full=Probable nucleoredoxin 1; Short=AtNrx1; EC=1.8.1.8;	A0A8B7C6L6_PHODC SubName: Full=probable nucleoredoxin 1 {ECO:0000313|RefSeq:XP_008792848.2};	Thioredoxin, nucleoredoxin and related proteins	GO:0005829,cytosol; GO:0005634,nucleus; GO:0004791,thioredoxin-disulfide reductase activity; GO:0009860,pollen tube growth; GO:0010183,pollen tube guidance; GO:0080092,regulation of pollen tube growth; GO:0003674,molecular_function; GO:0003824,catalytic activity; GO:0015036,disulfide oxidoreductase activity; GO:0016209,antioxidant activity; GO:0016491,oxidoreductase activity; GO:0016651,oxidoredu…	Thioredoxin-like	--	--	--
Cluster-100188.8	3254	K17609 nucleoredoxin [EC:1.8.1.8] | (RefSeq) probable nucleoredoxin 1 (A)	--	probable nucleoredoxin 1 [Asparagus officinalis]	NRX1_ARATH RecName: Full=Probable nucleoredoxin 1; Short=AtNrx1; EC=1.8.1.8;	A0A8B7C6L6_PHODC SubName: Full=probable nucleoredoxin 1 {ECO:0000313|RefSeq:XP_008792848.2};	Thioredoxin, nucleoredoxin and related proteins	GO:0005829,cytosol; GO:0005634,nucleus; GO:0004791,thioredoxin-disulfide reductase activity; GO:0009860,pollen tube growth; GO:0010183,pollen tube guidance; GO:0080092,regulation of pollen tube growth; GO:0003674,molecular_function; GO:0003824,catalytic activity; GO:0015036,disulfide oxidoreductase activity; GO:0016209,antioxidant activity; GO:0016491,oxidoreductase activity; GO:0016651,oxidoredu…	Thioredoxin-like	--	--	--
Cluster-100188.9	975	K17609 nucleoredoxin [EC:1.8.1.8] | (RefSeq) probable nucleoredoxin 1 (A)	--	probable nucleoredoxin 1 [Asparagus officinalis]	NRX1_ARATH RecName: Full=Probable nucleoredoxin 1; Short=AtNrx1; EC=1.8.1.8;	A0A6J0PQM6_ELAGV SubName: Full=probable nucleoredoxin 1-2 {ECO:0000313|RefSeq:XP_019710017.1};	Thioredoxin, nucleoredoxin and related proteins	GO:0005829,cytosol; GO:0005634,nucleus; GO:0004791,thioredoxin-disulfide reductase activity; GO:0009860,pollen tube growth; GO:0010183,pollen tube guidance; GO:0080092,regulation of pollen tube growth; GO:0003674,molecular_function; GO:0003824,catalytic activity; GO:0015036,disulfide oxidoreductase activity; GO:0016209,antioxidant activity; GO:0016491,oxidoreductase activity; GO:0016651,oxidoredu…	Thioredoxin-like	--	--	--
Cluster-100189.0	714	--	--	DNA repair RAD52-like protein 2, chloroplastic [Asparagus officinalis]	RD522_ARATH RecName: Full=DNA repair RAD52-like protein 2, chloroplastic {ECO:0000305}; AltName: Full=Organellar DNA-binding protein 2 {ECO:0000303|PubMed:22762281}; Flags: Precursor;	A0A4S8JS76_MUSBA SubName: Full=Uncharacterized protein {ECO:0000313|EMBL:THU64958.1};	--	GO:0009507,chloroplast; GO:0009536,plastid; GO:0003677,DNA binding; GO:0000724,double-strand break repair via homologous recombination; GO:0003674,molecular_function; GO:0003676,nucleic acid binding; GO:0005488,binding; GO:0097159,organic cyclic compound binding; GO:1901363,heterocyclic compound binding; GO:0000725,recombinational repair; GO:0006139,nucleobase-containing compound metabolic proces…	--	--	--	--
Cluster-100189.1	870	--	--	DNA repair RAD52-like protein 2, chloroplastic [Asparagus officinalis]	RD522_ARATH RecName: Full=DNA repair RAD52-like protein 2, chloroplastic {ECO:0000305}; AltName: Full=Organellar DNA-binding protein 2 {ECO:0000303|PubMed:22762281}; Flags: Precursor;	A0A6I9QHB3_ELAGV SubName: Full=DNA repair RAD52-like protein 2, chloroplastic {ECO:0000313|RefSeq:XP_010909258.1};	--	GO:0009507,chloroplast; GO:0009536,plastid; GO:0003677,DNA binding; GO:0000724,double-strand break repair via homologous recombination; GO:0003674,molecular_function; GO:0003676,nucleic acid binding; GO:0005488,binding; GO:0097159,organic cyclic compound binding; GO:1901363,heterocyclic compound binding; GO:0000725,recombinational repair; GO:0006139,nucleobase-containing compound metabolic proces…	--	--	--	--
Cluster-100189.2	935	--	--	DNA repair RAD52-like protein 2, chloroplastic [Asparagus officinalis]	RD522_ARATH RecName: Full=DNA repair RAD52-like protein 2, chloroplastic {ECO:0000305}; AltName: Full=Organellar DNA-binding protein 2 {ECO:0000303|PubMed:22762281}; Flags: Precursor;	A0A6I9QHB3_ELAGV SubName: Full=DNA repair RAD52-like protein 2, chloroplastic {ECO:0000313|RefSeq:XP_010909258.1};	--	GO:0009507,chloroplast; GO:0009536,plastid; GO:0003677,DNA binding; GO:0000724,double-strand break repair via homologous recombination; GO:0003674,molecular_function; GO:0003676,nucleic acid binding; GO:0005488,binding; GO:0097159,organic cyclic compound binding; GO:1901363,heterocyclic compound binding; GO:0000725,recombinational repair; GO:0006139,nucleobase-containing compound metabolic proces…	--	--	--	--
Cluster-100189.3	669	--	--	DNA repair RAD52-like protein 2, chloroplastic [Asparagus officinalis]	RD522_ARATH RecName: Full=DNA repair RAD52-like protein 2, chloroplastic {ECO:0000305}; AltName: Full=Organellar DNA-binding protein 2 {ECO:0000303|PubMed:22762281}; Flags: Precursor;	A0A4S8JS76_MUSBA SubName: Full=Uncharacterized protein {ECO:0000313|EMBL:THU64958.1};	--	GO:0009507,chloroplast; GO:0009536,plastid; GO:0003677,DNA binding; GO:0000724,double-strand break repair via homologous recombination; GO:0003674,molecular_function; GO:0003676,nucleic acid binding; GO:0005488,binding; GO:0097159,organic cyclic compound binding; GO:1901363,heterocyclic compound binding; GO:0000725,recombinational repair; GO:0006139,nucleobase-containing compound metabolic proces…	--	--	--	--
Cluster-100189.4	981	--	--	DNA repair RAD52-like protein 2, chloroplastic [Asparagus officinalis]	RD522_ARATH RecName: Full=DNA repair RAD52-like protein 2, chloroplastic {ECO:0000305}; AltName: Full=Organellar DNA-binding protein 2 {ECO:0000303|PubMed:22762281}; Flags: Precursor;	A0A6I9QHB3_ELAGV SubName: Full=DNA repair RAD52-like protein 2, chloroplastic {ECO:0000313|RefSeq:XP_010909258.1};	--	GO:0009507,chloroplast; GO:0009536,plastid; GO:0003677,DNA binding; GO:0000724,double-strand break repair via homologous recombination; GO:0003674,molecular_function; GO:0003676,nucleic acid binding; GO:0005488,binding; GO:0097159,organic cyclic compound binding; GO:1901363,heterocyclic compound binding; GO:0000725,recombinational repair; GO:0006139,nucleobase-containing compound metabolic proces…	--	--	--	--
Cluster-100189.5	782	--	--	DNA repair RAD52-like protein 2, chloroplastic [Asparagus officinalis]	RD522_ARATH RecName: Full=DNA repair RAD52-like protein 2, chloroplastic {ECO:0000305}; AltName: Full=Organellar DNA-binding protein 2 {ECO:0000303|PubMed:22762281}; Flags: Precursor;	A0A6I9QHB3_ELAGV SubName: Full=DNA repair RAD52-like protein 2, chloroplastic {ECO:0000313|RefSeq:XP_010909258.1};	--	GO:0009507,chloroplast; GO:0009536,plastid; GO:0003677,DNA binding; GO:0000724,double-strand break repair via homologous recombination; GO:0003674,molecular_function; GO:0003676,nucleic acid binding; GO:0005488,binding; GO:0097159,organic cyclic compound binding; GO:1901363,heterocyclic compound binding; GO:0000725,recombinational repair; GO:0006139,nucleobase-containing compound metabolic proces…	--	--	--	--
Cluster-100189.6	482	--	--	DNA repair RAD52-like protein 2, chloroplastic [Asparagus officinalis]	RD522_ARATH RecName: Full=DNA repair RAD52-like protein 2, chloroplastic {ECO:0000305}; AltName: Full=Organellar DNA-binding protein 2 {ECO:0000303|PubMed:22762281}; Flags: Precursor;	A0A5P1E7V8_ASPOF SubName: Full=Uncharacterized protein {ECO:0000313|EMBL:ONK58721.1};	--	GO:0009507,chloroplast; GO:0009536,plastid; GO:0003677,DNA binding; GO:0000724,double-strand break repair via homologous recombination; GO:0003674,molecular_function; GO:0003676,nucleic acid binding; GO:0005488,binding; GO:0097159,organic cyclic compound binding; GO:1901363,heterocyclic compound binding; GO:0000725,recombinational repair; GO:0006139,nucleobase-containing compound metabolic proces…	--	--	--	--
Cluster-10019.0	226	K09843 (+)-abscisic acid 8'-hydroxylase [EC:1.14.14.137] | (RefSeq) abscisic acid 8'-hydroxylase 1-like (A)	ko00906: Carotenoid biosynthesis; ko01110: Biosynthesis of secondary metabolites	--	--	--	--	--	--	--	--	--
Cluster-100190.0	913	--	--	--	--	--	--	--	--	--	--	--
Cluster-100190.1	1650	--	--	--	--	--	--	--	--	--	--	--
Cluster-100191.0	559	K01770 2-C-methyl-D-erythritol 2,4-cyclodiphosphate synthase [EC:4.6.1.12] | (RefSeq) 2-C-methyl-D-erythritol 2,4-cyclodiphosphate synthase, chloroplastic isoform X1 (A)	ko00900: Terpenoid backbone biosynthesis; ko01100: Metabolic pathways; ko01110: Biosynthesis of secondary metabolites	hypothetical protein BHE74_00032981 [Ensete ventricosum]	ISPF_CATRO RecName: Full=2-C-methyl-D-erythritol 2,4-cyclodiphosphate synthase, chloroplastic {ECO:0000305}; Short=MECDP-synthase {ECO:0000305}; Short=MECPS {ECO:0000305}; EC=4.6.1.12 {ECO:0000250|UniProtKB:Q9CAK8}; Flags: Precursor;	A0A804J0B4_MUSAM RecName: Full=2-C-methyl-D-erythritol 2,4-cyclodiphosphate synthase {ECO:0000256|ARBA:ARBA00012579, ECO:0000256|RuleBase:RU004395}; EC=4.6.1.12 {ECO:0000256|ARBA:ARBA00012579, ECO:0000256|RuleBase:RU004395};	--	GO:0009570,chloroplast stroma; GO:0008685,2-C-methyl-D-erythritol 2,4-cyclodiphosphate synthase activity; GO:0046872,metal ion binding; GO:0019288,isopentenyl diphosphate biosynthetic process, methylerythritol 4-phosphate pathway; GO:0016114,terpenoid biosynthetic process; GO:0003674,molecular_function; GO:0003824,catalytic activity; GO:0016829,lyase activity; GO:0016849,phosphorus-oxygen lyase a…	--	--	--	--
Cluster-100192.0	1002	K14292 trimethylguanosine synthase [EC:2.1.1.-] | (RefSeq) trimethylguanosine synthase (A)	--	protein SODIUM POTASSIUM ROOT DEFECTIVE 1-like [Asparagus officinalis]	NAKR2_ARATH RecName: Full=Protein SODIUM POTASSIUM ROOT DEFECTIVE 2 {ECO:0000303|PubMed:21193571}; Short=NaKR2 {ECO:0000303|PubMed:21193571}; AltName: Full=Heavy metal-associated plant protein 3 {ECO:0000303|PubMed:23368984}; Short=AtHPP03 {ECO:0000303|PubMed:23368984};	A0A5P1F8B6_ASPOF RecName: Full=HMA domain-containing protein {ECO:0000259|PROSITE:PS50846};	Copper chaperone	GO:0046872,metal ion binding; GO:0003674,molecular_function; GO:0005488,binding; GO:0043167,ion binding; GO:0043169,cation binding	Heavy-metal-associated domain	--	--	--
Cluster-100192.1	901	K14292 trimethylguanosine synthase [EC:2.1.1.-] | (RefSeq) trimethylguanosine synthase (A)	--	protein SODIUM POTASSIUM ROOT DEFECTIVE 1-like [Zingiber officinale]	NAKR2_ARATH RecName: Full=Protein SODIUM POTASSIUM ROOT DEFECTIVE 2 {ECO:0000303|PubMed:21193571}; Short=NaKR2 {ECO:0000303|PubMed:21193571}; AltName: Full=Heavy metal-associated plant protein 3 {ECO:0000303|PubMed:23368984}; Short=AtHPP03 {ECO:0000303|PubMed:23368984};	A0A8J5CBM9_ZINOF RecName: Full=HMA domain-containing protein {ECO:0000259|Pfam:PF00403};	Copper chaperone	GO:0046872,metal ion binding; GO:0003674,molecular_function; GO:0005488,binding; GO:0043167,ion binding; GO:0043169,cation binding	Heavy-metal-associated domain	--	--	--
Cluster-100192.2	693	K14292 trimethylguanosine synthase [EC:2.1.1.-] | (RefSeq) trimethylguanosine synthase (A)	--	protein SODIUM POTASSIUM ROOT DEFECTIVE 1-like [Zingiber officinale]	NAKR2_ARATH RecName: Full=Protein SODIUM POTASSIUM ROOT DEFECTIVE 2 {ECO:0000303|PubMed:21193571}; Short=NaKR2 {ECO:0000303|PubMed:21193571}; AltName: Full=Heavy metal-associated plant protein 3 {ECO:0000303|PubMed:23368984}; Short=AtHPP03 {ECO:0000303|PubMed:23368984};	A0A8J5CBM9_ZINOF RecName: Full=HMA domain-containing protein {ECO:0000259|Pfam:PF00403};	Copper chaperone	GO:0046872,metal ion binding; GO:0003674,molecular_function; GO:0005488,binding; GO:0043167,ion binding; GO:0043169,cation binding	Heavy-metal-associated domain	--	--	--
Cluster-100192.3	755	K14292 trimethylguanosine synthase [EC:2.1.1.-] | (RefSeq) trimethylguanosine synthase (A)	--	protein SODIUM POTASSIUM ROOT DEFECTIVE 1-like [Zingiber officinale]	NAKR2_ARATH RecName: Full=Protein SODIUM POTASSIUM ROOT DEFECTIVE 2 {ECO:0000303|PubMed:21193571}; Short=NaKR2 {ECO:0000303|PubMed:21193571}; AltName: Full=Heavy metal-associated plant protein 3 {ECO:0000303|PubMed:23368984}; Short=AtHPP03 {ECO:0000303|PubMed:23368984};	A0A8J5CBM9_ZINOF RecName: Full=HMA domain-containing protein {ECO:0000259|Pfam:PF00403};	Copper chaperone	GO:0046872,metal ion binding; GO:0003674,molecular_function; GO:0005488,binding; GO:0043167,ion binding; GO:0043169,cation binding	Heavy-metal-associated domain	--	--	--
Cluster-100192.4	889	K14292 trimethylguanosine synthase [EC:2.1.1.-] | (RefSeq) trimethylguanosine synthase (A)	--	protein SODIUM POTASSIUM ROOT DEFECTIVE 1-like [Zingiber officinale]	NAKR2_ARATH RecName: Full=Protein SODIUM POTASSIUM ROOT DEFECTIVE 2 {ECO:0000303|PubMed:21193571}; Short=NaKR2 {ECO:0000303|PubMed:21193571}; AltName: Full=Heavy metal-associated plant protein 3 {ECO:0000303|PubMed:23368984}; Short=AtHPP03 {ECO:0000303|PubMed:23368984};	A0A8J5CBM9_ZINOF RecName: Full=HMA domain-containing protein {ECO:0000259|Pfam:PF00403};	Copper chaperone	GO:0046872,metal ion binding; GO:0003674,molecular_function; GO:0005488,binding; GO:0043167,ion binding; GO:0043169,cation binding	Heavy-metal-associated domain	--	--	--
Cluster-100193.0	845	--	--	uncharacterized protein LOC109821168 [Asparagus officinalis]	--	--	--	--	Zinc knuckle	--	--	--
Cluster-100194.0	724	--	--	--	--	--	--	--	--	--	--	--
Cluster-100195.0	1527	K10256 omega-6 fatty acid desaturase / acyl-lipid omega-6 desaturase (Delta-12 desaturase) [EC:1.14.19.6 1.14.19.22] | (RefSeq) delta(12)-fatty-acid desaturase FAD2-like (A)	ko01040: Biosynthesis of unsaturated fatty acids; ko01100: Metabolic pathways; ko01212: Fatty acid metabolism	delta(12)-fatty-acid desaturase FAD2-like [Asparagus officinalis]	DES2_SORBI RecName: Full=Fatty acid desaturase DES2 {ECO:0000303|PubMed:17178719}; Short=SbDES2 {ECO:0000303|PubMed:17178719}; EC=1.14.19.- {ECO:0000305};	A0A5P1ERP7_ASPOF SubName: Full=Uncharacterized protein {ECO:0000313|EMBL:ONK68692.1};	--	GO:0016021,integral component of membrane; GO:0016717,oxidoreductase activity, acting on paired donors, with oxidation of a pair of donors resulting in the reduction of molecular oxygen to two molecules of water; GO:0006636,unsaturated fatty acid biosynthetic process; GO:0003674,molecular_function; GO:0003824,catalytic activity; GO:0016491,oxidoreductase activity; GO:0016705,oxidoreductase activi…	Fatty acid desaturase	--	--	--
Cluster-100195.1	1221	K10256 omega-6 fatty acid desaturase / acyl-lipid omega-6 desaturase (Delta-12 desaturase) [EC:1.14.19.6 1.14.19.22] | (RefSeq) delta(12)-fatty-acid desaturase FAD2-like (A)	ko01040: Biosynthesis of unsaturated fatty acids; ko01100: Metabolic pathways; ko01212: Fatty acid metabolism	delta(12)-fatty-acid desaturase FAD2-like [Asparagus officinalis]	DES2_SORBI RecName: Full=Fatty acid desaturase DES2 {ECO:0000303|PubMed:17178719}; Short=SbDES2 {ECO:0000303|PubMed:17178719}; EC=1.14.19.- {ECO:0000305};	A0A5P1ERP7_ASPOF SubName: Full=Uncharacterized protein {ECO:0000313|EMBL:ONK68692.1};	--	GO:0016021,integral component of membrane; GO:0016717,oxidoreductase activity, acting on paired donors, with oxidation of a pair of donors resulting in the reduction of molecular oxygen to two molecules of water; GO:0006636,unsaturated fatty acid biosynthetic process; GO:0003674,molecular_function; GO:0003824,catalytic activity; GO:0016491,oxidoreductase activity; GO:0016705,oxidoreductase activi…	Fatty acid desaturase	--	--	--
Cluster-100196.0	3267	K00030 isocitrate dehydrogenase (NAD+) [EC:1.1.1.41] | (RefSeq) isocitrate dehydrogenase [NAD] catalytic subunit 5, mitochondrial-like (A)	ko00020: Citrate cycle (TCA cycle); ko01100: Metabolic pathways; ko01110: Biosynthesis of secondary metabolites; ko01200: Carbon metabolism; ko01210: 2-Oxocarboxylic acid metabolism; ko01230: Biosynthesis of amino acids	isocitrate dehydrogenases, partial [Hyacinthus orientalis]	LEU3_SOLTU RecName: Full=3-isopropylmalate dehydrogenase, chloroplastic; Short=3-IPM-DH; Short=IMDH; EC=1.1.1.85; AltName: Full=Beta-IPM dehydrogenase; Flags: Precursor;	A0A804LIG8_MAIZE RecName: Full=Iso_dh domain-containing protein {ECO:0000259|SMART:SM01329};	Isocitrate dehydrogenase, alpha subunit	GO:0009507,chloroplast; GO:0005739,mitochondrion; GO:0003862,3-isopropylmalate dehydrogenase activity; GO:0004449,isocitrate dehydrogenase (NAD+) activity; GO:0000287,magnesium ion binding; GO:0051287,NAD binding; GO:0006102,isocitrate metabolic process; GO:0009098,leucine biosynthetic process; GO:0006099,tricarboxylic acid cycle; GO:0003674,molecular_function; GO:0003824,catalytic activity; GO:0…	--	--	--	--
Cluster-100197.0	1218	K08202 MFS transporter, OCT family, solute carrier family 22 (organic cation transporter), member 4/5 | (RefSeq) organic cation/carnitine transporter 4-like (A)	--	organic cation/carnitine transporter 4 [Cocos nucifera]	OCT4_ARATH RecName: Full=Organic cation/carnitine transporter 4; Short=AtOCT4;	A0A6I9R868_ELAGV SubName: Full=organic cation/carnitine transporter 4 {ECO:0000313|RefSeq:XP_010922144.2};	Synaptic vesicle transporter SVOP and related transporters (major facilitator superfamily)	GO:0009535,chloroplast thylakoid membrane; GO:0016021,integral component of membrane; GO:0009705,plant-type vacuole membrane; GO:0005524,ATP binding; GO:0022857,transmembrane transporter activity; GO:0042631,cellular response to water deprivation; GO:0006811,ion transport; GO:0000166,nucleotide binding; GO:0003674,molecular_function; GO:0005488,binding; GO:0017076,purine nucleotide binding; GO:00…	Sugar (and other) transporter	--	--	--
Cluster-100197.1	1507	K08202 MFS transporter, OCT family, solute carrier family 22 (organic cation transporter), member 4/5 | (RefSeq) organic cation/carnitine transporter 4-like (A)	--	organic cation/carnitine transporter 4 [Elaeis guineensis]	OCT4_ARATH RecName: Full=Organic cation/carnitine transporter 4; Short=AtOCT4;	A0A6I9R868_ELAGV SubName: Full=organic cation/carnitine transporter 4 {ECO:0000313|RefSeq:XP_010922144.2};	Synaptic vesicle transporter SVOP and related transporters (major facilitator superfamily)	GO:0009535,chloroplast thylakoid membrane; GO:0016021,integral component of membrane; GO:0009705,plant-type vacuole membrane; GO:0005524,ATP binding; GO:0022857,transmembrane transporter activity; GO:0042631,cellular response to water deprivation; GO:0006811,ion transport; GO:0000166,nucleotide binding; GO:0003674,molecular_function; GO:0005488,binding; GO:0017076,purine nucleotide binding; GO:00…	Sugar (and other) transporter	--	--	--
Cluster-100197.2	1780	K08202 MFS transporter, OCT family, solute carrier family 22 (organic cation transporter), member 4/5 | (RefSeq) organic cation/carnitine transporter 4-like (A)	--	organic cation/carnitine transporter 4 [Elaeis guineensis]	OCT4_ARATH RecName: Full=Organic cation/carnitine transporter 4; Short=AtOCT4;	A0A6I9R868_ELAGV SubName: Full=organic cation/carnitine transporter 4 {ECO:0000313|RefSeq:XP_010922144.2};	Synaptic vesicle transporter SVOP and related transporters (major facilitator superfamily)	GO:0009535,chloroplast thylakoid membrane; GO:0016021,integral component of membrane; GO:0009705,plant-type vacuole membrane; GO:0005524,ATP binding; GO:0022857,transmembrane transporter activity; GO:0042631,cellular response to water deprivation; GO:0006811,ion transport; GO:0000166,nucleotide binding; GO:0003674,molecular_function; GO:0005488,binding; GO:0017076,purine nucleotide binding; GO:00…	Sugar (and other) transporter	--	--	--
Cluster-100197.3	2068	K08202 MFS transporter, OCT family, solute carrier family 22 (organic cation transporter), member 4/5 | (RefSeq) organic cation/carnitine transporter 4-like (A)	--	organic cation/carnitine transporter 4 [Elaeis guineensis]	OCT4_ARATH RecName: Full=Organic cation/carnitine transporter 4; Short=AtOCT4;	A0A6I9R868_ELAGV SubName: Full=organic cation/carnitine transporter 4 {ECO:0000313|RefSeq:XP_010922144.2};	Synaptic vesicle transporter SVOP and related transporters (major facilitator superfamily)	GO:0009535,chloroplast thylakoid membrane; GO:0016021,integral component of membrane; GO:0009705,plant-type vacuole membrane; GO:0005524,ATP binding; GO:0022857,transmembrane transporter activity; GO:0042631,cellular response to water deprivation; GO:0006811,ion transport; GO:0000166,nucleotide binding; GO:0003674,molecular_function; GO:0005488,binding; GO:0017076,purine nucleotide binding; GO:00…	Sugar (and other) transporter	--	--	--
Cluster-100197.4	1539	K08202 MFS transporter, OCT family, solute carrier family 22 (organic cation transporter), member 4/5 | (RefSeq) organic cation/carnitine transporter 4-like (A)	--	organic cation/carnitine transporter 4 [Cocos nucifera]	OCT4_ARATH RecName: Full=Organic cation/carnitine transporter 4; Short=AtOCT4;	A0A8K0IRR3_COCNU SubName: Full=Organic cation/carnitine transporter 4 {ECO:0000313|EMBL:KAG1365381.1};	Synaptic vesicle transporter SVOP and related transporters (major facilitator superfamily)	GO:0009535,chloroplast thylakoid membrane; GO:0016021,integral component of membrane; GO:0009705,plant-type vacuole membrane; GO:0005524,ATP binding; GO:0022857,transmembrane transporter activity; GO:0042631,cellular response to water deprivation; GO:0006811,ion transport; GO:0000166,nucleotide binding; GO:0003674,molecular_function; GO:0005488,binding; GO:0017076,purine nucleotide binding; GO:00…	Sugar (and other) transporter	--	--	--
Cluster-100198.0	590	--	--	--	--	--	--	--	--	--	--	--
Cluster-100199.0	539	--	--	--	--	--	--	--	--	--	--	--
Cluster-1002.0	658	--	--	--	--	--	--	--	--	--	--	--
Cluster-1002.1	528	--	--	--	--	--	--	--	--	--	--	--
Cluster-10020.0	524	--	--	--	--	--	--	--	--	--	--	--
Cluster-100200.0	1515	--	--	--	--	--	--	--	--	--	--	--
Cluster-100201.0	2013	--	--	--	--	--	--	--	--	--	--	--
Cluster-100202.0	316	--	--	--	--	--	--	--	--	--	--	--
Cluster-100203.0	1211	K19041 E3 ubiquitin-protein ligase RNF38/44 [EC:2.3.2.27] | (RefSeq) RING-H2 finger protein ATL43 (A)	--	RING-H2 finger protein ATL13-like [Asparagus officinalis]	ATL13_ARATH RecName: Full=RING-H2 finger protein ATL13; EC=2.3.2.27 {ECO:0000305}; AltName: Full=RING-type E3 ubiquitin transferase ATL13 {ECO:0000305};	A0A5P1EV46_ASPOF RecName: Full=RING-type domain-containing protein {ECO:0000259|PROSITE:PS50089};	FOG: Predicted E3 ubiquitin ligase	GO:0016021,integral component of membrane; GO:0005886,plasma membrane; GO:0046872,metal ion binding; GO:0016740,transferase activity; GO:0031625,ubiquitin protein ligase binding; GO:0016567,protein ubiquitination; GO:0003674,molecular_function; GO:0005488,binding; GO:0043167,ion binding; GO:0043169,cation binding; GO:0003824,catalytic activity; GO:0005515,protein binding; GO:0019899,enzyme bindin…	Ring finger domain	--	--	--
Cluster-100204.0	422	--	--	--	--	--	--	--	--	--	--	--
Cluster-100205.0	367	--	--	--	--	--	--	--	--	--	--	--
Cluster-100206.0	629	K01179 endoglucanase [EC:3.2.1.4] | (RefSeq) endoglucanase 8-like (A)	ko00500: Starch and sucrose metabolism; ko01100: Metabolic pathways	Endoglucanase 8 [Capsicum baccatum]	GUN8_ARATH RecName: Full=Endoglucanase 8; EC=3.2.1.4; AltName: Full=Cellulase 1; Short=AtCEL1; AltName: Full=Endo-1,4-beta glucanase 8; Flags: Precursor;	A0A453PI98_AEGTS RecName: Full=Cellulase {ECO:0000256|ARBA:ARBA00012601}; EC=3.2.1.4 {ECO:0000256|ARBA:ARBA00012601};	--	GO:0009507,chloroplast; GO:0005576,extracellular region; GO:0008810,cellulase activity; GO:0042547,cell wall modification involved in multidimensional cell growth; GO:0030245,cellulose catabolic process; GO:0003674,molecular_function; GO:0003824,catalytic activity; GO:0004553,hydrolase activity, hydrolyzing O-glycosyl compounds; GO:0016787,hydrolase activity; GO:0016798,hydrolase activity, acting…	--	--	--	--
Cluster-100207.0	2058	--	--	--	--	--	--	--	--	--	--	--
Cluster-100207.1	1911	--	--	--	--	--	--	--	--	--	--	--
Cluster-100207.2	2033	--	--	--	--	--	--	--	--	--	--	--
Cluster-100208.0	1674	--	--	--	--	A0A812QUC0_SYMMI SubName: Full=SadH protein {ECO:0000313|EMBL:CAE7404694.1};	--	--	Cyclic nucleotide-binding domain	--	--	--
Cluster-100209.0	1161	K10875 DNA repair and recombination protein RAD54 and RAD54-like protein [EC:5.6.2.-] | (RefSeq) protein CHROMATIN REMODELING 35 (A)	ko03440: Homologous recombination	protein CHROMATIN REMODELING 35 [Asparagus officinalis]	CHR35_ARATH RecName: Full=Protein CHROMATIN REMODELING 35 {ECO:0000303|PubMed:16547115, ECO:0000303|PubMed:23770592}; AltName: Full=Protein DEFECTIVE IN MERISTEM SILENCING 1 {ECO:0000303|PubMed:18425128}; AltName: Full=Protein DEFECTIVE IN RNA-DIRECTED DNA METHYLATION 1 {ECO:0000303|PubMed:15120073};	A0A8B8ZFE9_PHODC SubName: Full=protein CHROMATIN REMODELING 35-like isoform X3 {ECO:0000313|RefSeq:XP_038970158.1};	DNA repair protein, SNF2 family	GO:0005634,nucleus; GO:0005721,pericentric heterochromatin; GO:0090577,RNA polymerase IV transcription regulator complex; GO:0000419,RNA polymerase V complex; GO:0005524,ATP binding; GO:0140658,NA; GO:0003677,DNA binding; GO:0004386,helicase activity; GO:0016787,hydrolase activity; GO:0071360,cellular response to exogenous dsRNA; GO:0050832,defense response to fungus; GO:0006306,DNA methylation; …	--	--	--	--
Cluster-10021.0	308	--	--	--	--	--	--	--	--	--	--	--
Cluster-100210.0	753	--	--	--	--	--	--	--	--	--	--	--
Cluster-100211.0	924	--	--	--	--	--	--	--	--	--	--	--
Cluster-100212.0	295	K19525 vacuolar protein sorting-associated protein 13A/C | (RefSeq) uncharacterized protein LOC109846239 (A)	--	uncharacterized protein A4U43_C06F16540 [Asparagus officinalis]	--	A0A5P1ERF3_ASPOF RecName: Full=Peroxin/Ferlin domain-containing protein {ECO:0000259|SMART:SM00694};	Vacuolar protein sorting-associated protein	--	--	--	--	--
Cluster-100213.0	597	K13195 cold-inducible RNA-binding protein | (RefSeq) LOW QUALITY PROTEIN: glycine-rich RNA-binding protein 7-like (A)	--	hypothetical protein PVAP13_3KG561700 [Panicum virgatum]	RBG7_ARATH RecName: Full=Glycine-rich RNA-binding protein 7 {ECO:0000303|PubMed:11809873, ECO:0000303|PubMed:16207746}; Short=AtGR-RBP7 {ECO:0000303|PubMed:11809873, ECO:0000303|PubMed:16207746}; AltName: Full=AtRBG7 {ECO:0000303|PubMed:20009520}; AltName: Full=Glycine-rich protein 7 {ECO:0000303|PubMed:20009520}; Short=AtGRP7 {ECO:0000303|PubMed:20009520}; AltName: Full=Protein COLD, CIRCADIAN R…	A0A426ZEK0_ENSVE RecName: Full=RRM domain-containing protein {ECO:0000259|PROSITE:PS50102};	FOG: RRM domain	GO:0009507,chloroplast; GO:0005737,cytoplasm; GO:0005829,cytosol; GO:0005615,extracellular space; GO:0005634,nucleus; GO:0005777,peroxisome; GO:0009506,plasmodesma; GO:0005773,vacuole; GO:0003690,double-stranded DNA binding; GO:0035198,miRNA binding; GO:0003730,mRNA 3'-UTR binding; GO:0003729,mRNA binding; GO:0003723,RNA binding; GO:0003697,single-stranded DNA binding; GO:0003727,single-stranded …	--	--	--	--
Cluster-100213.1	466	K13195 cold-inducible RNA-binding protein | (RefSeq) glycine-rich RNA-binding protein-like isoform X1 (A)	--	RNA recognition motif domain [Macleaya cordata]	GRP1_SINAL RecName: Full=Glycine-rich RNA-binding protein GRP1A;	A0A200R7M1_9MAGN SubName: Full=RNA recognition motif domain {ECO:0000313|EMBL:OVA18719.1};	FOG: RRM domain	GO:0005634,nucleus; GO:0003723,RNA binding; GO:0003674,molecular_function; GO:0003676,nucleic acid binding; GO:0005488,binding; GO:0097159,organic cyclic compound binding; GO:1901363,heterocyclic compound binding; GO:0005575,cellular_component; GO:0005622,intracellular anatomical structure; GO:0043226,organelle; GO:0043227,membrane-bounded organelle; GO:0043229,intracellular organelle; GO:0043231…	--	--	--	--
Cluster-100213.2	489	K13195 cold-inducible RNA-binding protein | (RefSeq) glycine-rich RNA-binding protein-like isoform X1 (A)	--	hypothetical protein H6P81_003570 [Aristolochia fimbriata]	GRP1_SINAL RecName: Full=Glycine-rich RNA-binding protein GRP1A;	A0A2I0X6B4_9ASPA SubName: Full=Glycine-rich RNA-binding protein 7 {ECO:0000313|EMBL:PKU83447.1};	FOG: RRM domain	GO:0005634,nucleus; GO:0003723,RNA binding; GO:0003674,molecular_function; GO:0003676,nucleic acid binding; GO:0005488,binding; GO:0097159,organic cyclic compound binding; GO:1901363,heterocyclic compound binding; GO:0005575,cellular_component; GO:0005622,intracellular anatomical structure; GO:0043226,organelle; GO:0043227,membrane-bounded organelle; GO:0043229,intracellular organelle; GO:0043231…	--	--	--	--
Cluster-100213.3	674	K13195 cold-inducible RNA-binding protein | (RefSeq) glycine-rich RNA-binding protein-like (A)	--	putative RNA recognition motif domain, nucleotide-binding alpha-beta plait domain superfamily [Helianthus annuus]	GRP2_SINAL RecName: Full=Glycine-rich RNA-binding protein GRP2A;	A0A251TLZ7_HELAN SubName: Full=Putative nucleotide-binding alpha-beta plait domain-containing protein {ECO:0000313|EMBL:OTG12100.1};	FOG: RRM domain	GO:0005634,nucleus; GO:0003723,RNA binding; GO:0003674,molecular_function; GO:0003676,nucleic acid binding; GO:0005488,binding; GO:0097159,organic cyclic compound binding; GO:1901363,heterocyclic compound binding; GO:0005575,cellular_component; GO:0005622,intracellular anatomical structure; GO:0043226,organelle; GO:0043227,membrane-bounded organelle; GO:0043229,intracellular organelle; GO:0043231…	--	--	--	--
Cluster-100213.4	314	K13195 cold-inducible RNA-binding protein | (RefSeq) glycine-rich RNA-binding protein GRP1A (A)	--	hypothetical protein H6P81_003570 [Aristolochia fimbriata]	GRP1_SINAL RecName: Full=Glycine-rich RNA-binding protein GRP1A;	A0A443N1G5_9MAGN SubName: Full=RNA recognition motif domain-containing protein {ECO:0000313|EMBL:RWR72375.1};	FOG: RRM domain	GO:0005634,nucleus; GO:0003723,RNA binding; GO:0003674,molecular_function; GO:0003676,nucleic acid binding; GO:0005488,binding; GO:0097159,organic cyclic compound binding; GO:1901363,heterocyclic compound binding; GO:0005575,cellular_component; GO:0005622,intracellular anatomical structure; GO:0043226,organelle; GO:0043227,membrane-bounded organelle; GO:0043229,intracellular organelle; GO:0043231…	--	--	--	--
Cluster-100213.5	772	K13195 cold-inducible RNA-binding protein | (RefSeq) LOW QUALITY PROTEIN: glycine-rich RNA-binding protein 7-like (A)	--	LOW QUALITY PROTEIN: glycine-rich RNA-binding protein 7-like [Asparagus officinalis]	RBG7_ARATH RecName: Full=Glycine-rich RNA-binding protein 7 {ECO:0000303|PubMed:11809873, ECO:0000303|PubMed:16207746}; Short=AtGR-RBP7 {ECO:0000303|PubMed:11809873, ECO:0000303|PubMed:16207746}; AltName: Full=AtRBG7 {ECO:0000303|PubMed:20009520}; AltName: Full=Glycine-rich protein 7 {ECO:0000303|PubMed:20009520}; Short=AtGRP7 {ECO:0000303|PubMed:20009520}; AltName: Full=Protein COLD, CIRCADIAN R…	A0A426ZEK0_ENSVE RecName: Full=RRM domain-containing protein {ECO:0000259|PROSITE:PS50102};	FOG: RRM domain	GO:0009507,chloroplast; GO:0005737,cytoplasm; GO:0005829,cytosol; GO:0005615,extracellular space; GO:0005634,nucleus; GO:0005777,peroxisome; GO:0009506,plasmodesma; GO:0005773,vacuole; GO:0003690,double-stranded DNA binding; GO:0035198,miRNA binding; GO:0003730,mRNA 3'-UTR binding; GO:0003729,mRNA binding; GO:0003723,RNA binding; GO:0003697,single-stranded DNA binding; GO:0003727,single-stranded …	--	--	--	--
Cluster-100214.0	378	--	--	hypothetical protein L1987_43233 [Smallanthus sonchifolius]	--	--	--	--	--	--	--	--
Cluster-100215.0	1032	--	--	--	--	--	--	--	--	--	--	--
Cluster-100216.0	936	--	--	--	--	--	--	--	--	--	--	--
Cluster-100217.0	734	--	--	--	--	--	--	--	--	--	--	--
Cluster-100218.0	427	--	--	--	--	--	--	--	--	--	--	--
Cluster-100219.0	552	--	--	uncharacterized protein LOC109823003 [Asparagus officinalis]	--	A0A834LH02_RHOSS RecName: Full=NAM-associated domain-containing protein {ECO:0000259|Pfam:PF14303};	--	--	--	--	--	--
Cluster-10022.0	265	K09503 DnaJ homolog subfamily A member 2 | (RefSeq) dnaJ protein homolog (A)	ko04141: Protein processing in endoplasmic reticulum	hypothetical protein GW17_00019298 [Ensete ventricosum]	DNAJ2_ARATH RecName: Full=Chaperone protein dnaJ 2; Short=AtDjA2; Flags: Precursor;	A0A427AWN0_ENSVE RecName: Full=J domain-containing protein {ECO:0000259|PROSITE:PS50076};	Molecular chaperone (DnaJ superfamily)	GO:0005737,cytoplasm; GO:0005829,cytosol; GO:0016020,membrane; GO:0009506,plasmodesma; GO:0009536,plastid; GO:0005524,ATP binding; GO:0051087,chaperone binding; GO:0030544,Hsp70 protein binding; GO:0046872,metal ion binding; GO:0003729,mRNA binding; GO:0051082,unfolded protein binding; GO:0006457,protein folding; GO:0042026,protein refolding; GO:0009408,response to heat; GO:0000166,nucleotide bin…	--	--	--	--
Cluster-100220.0	493	--	--	--	--	--	--	--	--	--	--	--
Cluster-100221.0	1182	--	--	--	--	--	--	--	--	--	--	--
Cluster-100222.0	368	--	--	--	--	--	--	--	--	--	--	--
Cluster-100223.0	332	--	--	--	--	--	--	--	--	--	--	--
Cluster-100224.0	397	K00472 prolyl 4-hydroxylase [EC:1.14.11.2] | (RefSeq) probable prolyl 4-hydroxylase 9 (A)	ko00330: Arginine and proline metabolism; ko01100: Metabolic pathways	hypothetical protein B296_00038922 [Ensete ventricosum]	P4H9_ARATH RecName: Full=Probable prolyl 4-hydroxylase 9 {ECO:0000305}; Short=AtP4H9 {ECO:0000303|Ref.6}; EC=1.14.11.2 {ECO:0000305};	A0A426ZV11_ENSVE SubName: Full=Uncharacterized protein {ECO:0000313|EMBL:RRT67790.1};	Prolyl 4-hydroxylase alpha subunit	GO:0005783,endoplasmic reticulum; GO:0005789,endoplasmic reticulum membrane; GO:0005794,Golgi apparatus; GO:0005797,Golgi medial cisterna; GO:0016021,integral component of membrane; GO:0005506,iron ion binding; GO:0031418,L-ascorbic acid binding; GO:0004656,procollagen-proline 4-dioxygenase activity; GO:0018401,peptidyl-proline hydroxylation to 4-hydroxy-L-proline; GO:0003674,molecular_function; …	--	--	--	--
Cluster-100225.0	1866	--	--	--	--	--	--	--	--	--	--	--
Cluster-100226.0	253	K15542 polyadenylation factor subunit 2 | (RefSeq) flowering time control protein FY (A)	ko03015: mRNA surveillance pathway	flowering time control protein FY-like, partial [Phalaenopsis equestris]	FY_ARATH RecName: Full=Flowering time control protein FY;	A0A453L9S3_AEGTS SubName: Full=Uncharacterized protein {ECO:0000313|EnsemblPlants:AET5Gv20683900.9};	Polyadenylation factor I complex, subunit PFS2	GO:0005847,mRNA cleavage and polyadenylation specificity factor complex; GO:0030154,cell differentiation; GO:0009908,flower development; GO:0006378,mRNA polyadenylation; GO:0008150,biological_process; GO:0009987,cellular process; GO:0032502,developmental process; GO:0048869,cellular developmental process; GO:0000003,reproduction; GO:0003006,developmental process involved in reproduction; GO:00072…	--	--	--	--
Cluster-100226.1	309	K15542 polyadenylation factor subunit 2 | (RefSeq) flowering time control protein FY (A)	ko03015: mRNA surveillance pathway	flowering time control protein FY-like [Dioscorea cayenensis subsp. rotundata]	FY_ARATH RecName: Full=Flowering time control protein FY;	A0A6I9SFG6_ELAGV SubName: Full=flowering time control protein FY {ECO:0000313|RefSeq:XP_010938598.1};	Polyadenylation factor I complex, subunit PFS2	GO:0005847,mRNA cleavage and polyadenylation specificity factor complex; GO:0030154,cell differentiation; GO:0009908,flower development; GO:0006378,mRNA polyadenylation; GO:0008150,biological_process; GO:0009987,cellular process; GO:0032502,developmental process; GO:0048869,cellular developmental process; GO:0000003,reproduction; GO:0003006,developmental process involved in reproduction; GO:00072…	--	--	--	--
Cluster-100226.2	253	K15542 polyadenylation factor subunit 2 | (RefSeq) flowering time control protein FY (A)	ko03015: mRNA surveillance pathway	flowering time control protein FY-like, partial [Phalaenopsis equestris]	FY_ARATH RecName: Full=Flowering time control protein FY;	A0A453L9S3_AEGTS SubName: Full=Uncharacterized protein {ECO:0000313|EnsemblPlants:AET5Gv20683900.9};	Polyadenylation factor I complex, subunit PFS2	GO:0005847,mRNA cleavage and polyadenylation specificity factor complex; GO:0030154,cell differentiation; GO:0009908,flower development; GO:0006378,mRNA polyadenylation; GO:0008150,biological_process; GO:0009987,cellular process; GO:0032502,developmental process; GO:0048869,cellular developmental process; GO:0000003,reproduction; GO:0003006,developmental process involved in reproduction; GO:00072…	--	--	--	--
Cluster-100227.0	329	--	--	F-box/LRR-repeat protein 15-like [Asparagus officinalis]	--	A0A5P1EHY9_ASPOF RecName: Full=F-box domain-containing protein {ECO:0000259|SMART:SM00256};	--	--	--	--	--	--
Cluster-100228.0	699	K14175 (3S,6E)-nerolidol synthase [EC:4.2.3.48] | (RefSeq) (3S,6E)-nerolidol synthase 1-like (A)	ko00909: Sesquiterpenoid and triterpenoid biosynthesis; ko01100: Metabolic pathways	LOW QUALITY PROTEIN: uncharacterized protein LOC116118121, partial [Pistacia vera]	--	A0A6D2ICX3_9BRAS SubName: Full=Uncharacterized protein {ECO:0000313|EMBL:CAA7027872.1};	FOG: Transposon-encoded proteins with TYA, reverse transcriptase, integrase domains in various combinations	--	RNase H-like domain found in reverse transcriptase	--	--	--
Cluster-100229.0	693	--	--	--	--	--	--	--	--	--	--	--
Cluster-10023.0	222	K02946 small subunit ribosomal protein S10 | (RefSeq) uncharacterized protein LOC109819958 (A)	ko03010: Ribosome	--	--	--	--	--	--	--	--	--
Cluster-10023.1	607	--	--	--	--	--	--	--	--	--	--	--
Cluster-10023.2	947	--	--	--	--	--	--	--	--	--	--	--
Cluster-10023.3	1333	--	--	--	--	--	--	--	--	--	--	--
Cluster-10023.4	1328	--	--	--	--	--	--	--	--	--	--	--
Cluster-10023.5	448	K02946 small subunit ribosomal protein S10 | (RefSeq) uncharacterized protein LOC109819958 (A)	ko03010: Ribosome	--	--	--	--	--	--	--	--	--
Cluster-10023.6	371	K02946 small subunit ribosomal protein S10 | (RefSeq) uncharacterized protein LOC109819958 (A)	ko03010: Ribosome	hypothetical protein FNV43_RR03769 [Rhamnella rubrinervis]	--	A0A8K0HKI0_9ROSA SubName: Full=Uncharacterized protein {ECO:0000313|EMBL:KAF3453329.1};	--	--	--	--	--	--
Cluster-10023.7	735	K02946 small subunit ribosomal protein S10 | (RefSeq) uncharacterized protein LOC109819958 (A)	ko03010: Ribosome	--	--	--	--	--	--	--	--	--
Cluster-100230.0	785	--	--	D-alanine-D-alanine ligase, partial [Trifolium pratense]	--	A0A2K3MLX6_TRIPR SubName: Full=D-alanine-D-alanine ligase {ECO:0000313|EMBL:PNX91760.1}; Flags: Fragment;	--	--	--	--	--	--
Cluster-100231.0	1568	--	--	--	--	--	--	--	--	--	--	--
Cluster-100232.0	573	--	--	--	--	--	--	--	--	--	--	--
Cluster-100232.1	872	--	--	--	--	--	--	--	--	--	--	--
Cluster-100232.2	1963	--	--	--	--	--	--	--	--	--	--	--
Cluster-100232.3	1936	--	--	--	--	--	--	--	--	--	--	--
Cluster-100232.4	1950	--	--	--	--	--	--	--	--	--	--	--
Cluster-100232.5	1974	--	--	--	--	--	--	--	--	--	--	--
Cluster-100232.6	1990	--	--	--	--	--	--	--	--	--	--	--
Cluster-100233.0	1060	--	--	--	--	--	--	--	--	--	--	--
Cluster-100234.0	966	--	--	--	--	--	--	--	--	--	--	--
Cluster-100235.0	1919	K07964 heparanase [EC:3.2.1.166] | (RefSeq) heparanase-like protein 3 (A)	ko00531: Glycosaminoglycan degradation; ko01100: Metabolic pathways	heparanase-like protein 3 [Asparagus officinalis]	HPSE3_ARATH RecName: Full=Heparanase-like protein 3; EC=3.2.-.-; Flags: Precursor;	A0A5P1FF17_ASPOF SubName: Full=Uncharacterized protein {ECO:0000313|EMBL:ONK76702.1};	--	GO:0005576,extracellular region; GO:0005765,lysosomal membrane; GO:0004566,beta-glucuronidase activity; GO:0003674,molecular_function; GO:0003824,catalytic activity; GO:0004553,hydrolase activity, hydrolyzing O-glycosyl compounds; GO:0016787,hydrolase activity; GO:0016798,hydrolase activity, acting on glycosyl bonds; GO:0005575,cellular_component; GO:0110165,cellular anatomical entity; GO:0000323…	Glycosyl hydrolase family 79, N-terminal domain	--	--	--
Cluster-100236.0	564	--	--	--	--	--	--	--	--	--	--	--
Cluster-100237.0	1143	--	--	--	--	--	--	--	--	--	--	--
Cluster-100238.0	1375	--	--	--	--	--	--	--	--	--	--	--
Cluster-100239.0	1073	--	--	--	--	--	--	--	--	--	--	--
Cluster-10024.0	540	--	--	--	--	--	--	--	--	--	--	--
Cluster-100240.0	1472	--	--	--	--	--	--	--	--	--	--	--
Cluster-100241.0	384	--	--	--	--	--	--	--	--	--	--	--
Cluster-100242.0	1068	K22651 E3 ubiquitin-protein ligase RNF4 [EC:2.3.2.27] | (RefSeq) E3 ubiquitin-protein ligase RNF4-like (A)	--	E3 ubiquitin-protein ligase RNF4-like [Asparagus officinalis]	PEX10_ARATH RecName: Full=Peroxisome biogenesis factor 10; AltName: Full=PER10; AltName: Full=Peroxin-10; AltName: Full=Peroxisomal biogenesis factor 10; Short=AtPEX10; Short=AthPEX10; AltName: Full=Peroxisome assembly protein 10; AltName: Full=Pex10p;	A0A5P1FKM2_ASPOF RecName: Full=RING-type domain-containing protein {ECO:0000259|PROSITE:PS50089};	Predicted E3 ubiquitin ligase	GO:0005829,cytosol; GO:0005778,peroxisomal membrane; GO:0005777,peroxisome; GO:0046872,metal ion binding; GO:0004842,ubiquitin-protein transferase activity; GO:0009793,embryo development ending in seed dormancy; GO:0006635,fatty acid beta-oxidation; GO:0007031,peroxisome organization; GO:0010381,peroxisome-chloroplast membrane tethering; GO:0009853,photorespiration; GO:0016558,protein import into…	Zinc finger, C3HC4 type (RING finger)	--	--	--
Cluster-100242.1	1029	K22651 E3 ubiquitin-protein ligase RNF4 [EC:2.3.2.27] | (RefSeq) E3 ubiquitin-protein ligase RNF4-like (A)	--	E3 ubiquitin-protein ligase RNF4-like [Asparagus officinalis]	PEX10_ARATH RecName: Full=Peroxisome biogenesis factor 10; AltName: Full=PER10; AltName: Full=Peroxin-10; AltName: Full=Peroxisomal biogenesis factor 10; Short=AtPEX10; Short=AthPEX10; AltName: Full=Peroxisome assembly protein 10; AltName: Full=Pex10p;	A0A5P1FKM2_ASPOF RecName: Full=RING-type domain-containing protein {ECO:0000259|PROSITE:PS50089};	Predicted E3 ubiquitin ligase	GO:0005829,cytosol; GO:0005778,peroxisomal membrane; GO:0005777,peroxisome; GO:0046872,metal ion binding; GO:0004842,ubiquitin-protein transferase activity; GO:0009793,embryo development ending in seed dormancy; GO:0006635,fatty acid beta-oxidation; GO:0007031,peroxisome organization; GO:0010381,peroxisome-chloroplast membrane tethering; GO:0009853,photorespiration; GO:0016558,protein import into…	Zinc finger, C3HC4 type (RING finger)	--	--	--
Cluster-100242.2	830	K22651 E3 ubiquitin-protein ligase RNF4 [EC:2.3.2.27] | (RefSeq) E3 ubiquitin-protein ligase RNF4-like (A)	--	E3 ubiquitin-protein ligase RNF4-like [Asparagus officinalis]	PEX10_ARATH RecName: Full=Peroxisome biogenesis factor 10; AltName: Full=PER10; AltName: Full=Peroxin-10; AltName: Full=Peroxisomal biogenesis factor 10; Short=AtPEX10; Short=AthPEX10; AltName: Full=Peroxisome assembly protein 10; AltName: Full=Pex10p;	A0A5P1FKM2_ASPOF RecName: Full=RING-type domain-containing protein {ECO:0000259|PROSITE:PS50089};	Predicted E3 ubiquitin ligase	GO:0005829,cytosol; GO:0005778,peroxisomal membrane; GO:0005777,peroxisome; GO:0046872,metal ion binding; GO:0004842,ubiquitin-protein transferase activity; GO:0009793,embryo development ending in seed dormancy; GO:0006635,fatty acid beta-oxidation; GO:0007031,peroxisome organization; GO:0010381,peroxisome-chloroplast membrane tethering; GO:0009853,photorespiration; GO:0016558,protein import into…	Zinc finger, C3HC4 type (RING finger)	--	--	--
Cluster-100242.3	1106	K22651 E3 ubiquitin-protein ligase RNF4 [EC:2.3.2.27] | (RefSeq) E3 ubiquitin-protein ligase RNF4-like (A)	--	E3 ubiquitin-protein ligase RNF4-like [Asparagus officinalis]	RMA1_ARATH RecName: Full=E3 ubiquitin-protein ligase RMA1; EC=2.3.2.27; AltName: Full=Protein RING membrane-anchor 1; AltName: Full=RING-type E3 ubiquitin transferase RMA1 {ECO:0000305};	A0A5P1FKM2_ASPOF RecName: Full=RING-type domain-containing protein {ECO:0000259|PROSITE:PS50089};	Predicted E3 ubiquitin ligase	GO:0005783,endoplasmic reticulum; GO:0005789,endoplasmic reticulum membrane; GO:0016021,integral component of membrane; GO:0016020,membrane; GO:0046872,metal ion binding; GO:0061630,ubiquitin protein ligase activity; GO:0044390,ubiquitin-like protein conjugating enzyme binding; GO:0004842,ubiquitin-protein transferase activity; GO:0071712,ER-associated misfolded protein catabolic process; GO:0032…	Zinc finger, C3HC4 type (RING finger)	--	--	--
Cluster-100243.0	290	--	--	--	--	--	--	--	--	--	--	--
Cluster-100244.0	776	--	--	--	--	--	--	--	--	--	--	--
Cluster-100245.0	281	K17604 zinc finger SWIM domain-containing protein 3 | (RefSeq) protein FAR1-RELATED SEQUENCE 5 isoform X1 (A)	--	protein FAR1-RELATED SEQUENCE 5 isoform X4 [Elaeis guineensis]	--	A0A6I9QJM9_ELAGV RecName: Full=Protein FAR1-RELATED SEQUENCE {ECO:0000256|RuleBase:RU367018};	--	--	--	--	--	--
Cluster-100245.1	2160	--	--	--	--	--	--	--	--	--	--	--
Cluster-100246.0	2893	K17710 pentatricopeptide repeat domain-containing protein 1 | (RefSeq) putative pentatricopeptide repeat-containing protein At2g02150 (A)	--	pentatricopeptide repeat protein AaPPR104, partial [Agave angustifolia]	PPR12_ARATH RecName: Full=Pentatricopeptide repeat-containing protein At1g05670, mitochondrial; Flags: Precursor;	A0A8B7C2Z5_PHODC SubName: Full=pentatricopeptide repeat-containing protein At1g05670, mitochondrial {ECO:0000313|RefSeq:XP_008790623.2};	FOG: PPR repeat	GO:0005783,endoplasmic reticulum; GO:0005794,Golgi apparatus; GO:0005739,mitochondrion; GO:0005575,cellular_component; GO:0005622,intracellular anatomical structure; GO:0005737,cytoplasm; GO:0012505,endomembrane system; GO:0043226,organelle; GO:0043227,membrane-bounded organelle; GO:0043229,intracellular organelle; GO:0043231,intracellular membrane-bounded organelle; GO:0110165,cellular anatomica…	PPR repeat family	--	--	--
Cluster-100246.1	359	--	--	hypothetical protein C4D60_Mb07t02170 [Musa balbisiana]	--	A0A4S8JCH7_MUSBA RecName: Full=Uncharacterized protein ycf23 {ECO:0000256|ARBA:ARBA00021523};	--	--	--	--	--	--
Cluster-100247.0	1178	--	--	--	--	--	--	--	--	--	--	--
Cluster-100248.0	446	--	--	--	--	--	--	--	--	--	--	--
Cluster-100249.0	540	K13201 nucleolysin TIA-1/TIAR | (RefSeq) oligouridylate-binding protein 1B isoform X1 (A)	--	hypothetical protein BHE74_00009871 [Ensete ventricosum]	UBP1C_ARATH RecName: Full=Oligouridylate-binding protein 1C; Short=AtUBP1c; AltName: Full=Polyuridylate-binding protein UBP1C; Short=Poly(U)-binding protein UBP1C;	A0A426ZDR6_ENSVE SubName: Full=Uncharacterized protein {ECO:0000313|EMBL:RRT62099.1}; Flags: Fragment;	FOG: RRM domain	GO:0005737,cytoplasm; GO:0005634,nucleus; GO:0003729,mRNA binding; GO:0071456,cellular response to hypoxia; GO:0006397,mRNA processing; GO:0034063,stress granule assembly; GO:0003674,molecular_function; GO:0003676,nucleic acid binding; GO:0003723,RNA binding; GO:0005488,binding; GO:0097159,organic cyclic compound binding; GO:1901363,heterocyclic compound binding; GO:0001666,response to hypoxia; G…	--	--	--	--
Cluster-100249.1	828	K13201 nucleolysin TIA-1/TIAR | (RefSeq) oligouridylate-binding protein 1-like isoform X1 (A)	--	PREDICTED: oligouridylate-binding protein 1-like isoform X3 [Musa acuminata subsp. malaccensis]	UBP1B_ARATH RecName: Full=Oligouridylate-binding protein 1B; Short=AtUBP1b; AltName: Full=Polyuridylate-binding protein UBP1B; Short=Poly(U)-binding protein UBP1B;	A0A804I660_MUSAM SubName: Full=(wild Malaysian banana) hypothetical protein {ECO:0000313|EMBL:CAG1862944.1};	FOG: RRM domain	GO:0005634,nucleus; GO:0003729,mRNA binding; GO:0006397,mRNA processing; GO:0003674,molecular_function; GO:0003676,nucleic acid binding; GO:0003723,RNA binding; GO:0005488,binding; GO:0097159,organic cyclic compound binding; GO:1901363,heterocyclic compound binding; GO:0006139,nucleobase-containing compound metabolic process; GO:0006396,RNA processing; GO:0006725,cellular aromatic compound metabo…	RNA recognition motif. (a.k.a. RRM, RBD, or RNP domain)	--	--	--
Cluster-100249.2	873	K13201 nucleolysin TIA-1/TIAR | (RefSeq) oligouridylate-binding protein 1-like isoform X1 (A)	--	PREDICTED: oligouridylate-binding protein 1-like isoform X3 [Musa acuminata subsp. malaccensis]	UBP1B_ARATH RecName: Full=Oligouridylate-binding protein 1B; Short=AtUBP1b; AltName: Full=Polyuridylate-binding protein UBP1B; Short=Poly(U)-binding protein UBP1B;	A0A804I660_MUSAM SubName: Full=(wild Malaysian banana) hypothetical protein {ECO:0000313|EMBL:CAG1862944.1};	FOG: RRM domain	GO:0005634,nucleus; GO:0003729,mRNA binding; GO:0006397,mRNA processing; GO:0003674,molecular_function; GO:0003676,nucleic acid binding; GO:0003723,RNA binding; GO:0005488,binding; GO:0097159,organic cyclic compound binding; GO:1901363,heterocyclic compound binding; GO:0006139,nucleobase-containing compound metabolic process; GO:0006396,RNA processing; GO:0006725,cellular aromatic compound metabo…	RNA recognition motif. (a.k.a. RRM, RBD, or RNP domain)	--	--	--
Cluster-100249.3	861	K13201 nucleolysin TIA-1/TIAR | (RefSeq) oligouridylate-binding protein 1-like isoform X1 (A)	--	PREDICTED: oligouridylate-binding protein 1-like isoform X3 [Musa acuminata subsp. malaccensis]	UBP1C_ARATH RecName: Full=Oligouridylate-binding protein 1C; Short=AtUBP1c; AltName: Full=Polyuridylate-binding protein UBP1C; Short=Poly(U)-binding protein UBP1C;	A0A804I660_MUSAM SubName: Full=(wild Malaysian banana) hypothetical protein {ECO:0000313|EMBL:CAG1862944.1};	FOG: RRM domain	GO:0005737,cytoplasm; GO:0005634,nucleus; GO:0003729,mRNA binding; GO:0071456,cellular response to hypoxia; GO:0006397,mRNA processing; GO:0034063,stress granule assembly; GO:0003674,molecular_function; GO:0003676,nucleic acid binding; GO:0003723,RNA binding; GO:0005488,binding; GO:0097159,organic cyclic compound binding; GO:1901363,heterocyclic compound binding; GO:0001666,response to hypoxia; G…	--	--	--	--
Cluster-100249.4	828	K13201 nucleolysin TIA-1/TIAR | (RefSeq) oligouridylate-binding protein 1-like isoform X1 (A)	--	PREDICTED: oligouridylate-binding protein 1-like isoform X3 [Musa acuminata subsp. malaccensis]	UBP1B_ARATH RecName: Full=Oligouridylate-binding protein 1B; Short=AtUBP1b; AltName: Full=Polyuridylate-binding protein UBP1B; Short=Poly(U)-binding protein UBP1B;	A0A804I660_MUSAM SubName: Full=(wild Malaysian banana) hypothetical protein {ECO:0000313|EMBL:CAG1862944.1};	FOG: RRM domain	GO:0005634,nucleus; GO:0003729,mRNA binding; GO:0006397,mRNA processing; GO:0003674,molecular_function; GO:0003676,nucleic acid binding; GO:0003723,RNA binding; GO:0005488,binding; GO:0097159,organic cyclic compound binding; GO:1901363,heterocyclic compound binding; GO:0006139,nucleobase-containing compound metabolic process; GO:0006396,RNA processing; GO:0006725,cellular aromatic compound metabo…	RNA recognition motif. (a.k.a. RRM, RBD, or RNP domain)	--	--	--
Cluster-100249.5	539	K13201 nucleolysin TIA-1/TIAR | (RefSeq) oligouridylate-binding protein 1-like isoform X1 (A)	--	PREDICTED: oligouridylate-binding protein 1-like isoform X3 [Musa acuminata subsp. malaccensis]	UBP1C_ARATH RecName: Full=Oligouridylate-binding protein 1C; Short=AtUBP1c; AltName: Full=Polyuridylate-binding protein UBP1C; Short=Poly(U)-binding protein UBP1C;	A0A804I660_MUSAM SubName: Full=(wild Malaysian banana) hypothetical protein {ECO:0000313|EMBL:CAG1862944.1};	FOG: RRM domain	GO:0005737,cytoplasm; GO:0005634,nucleus; GO:0003729,mRNA binding; GO:0071456,cellular response to hypoxia; GO:0006397,mRNA processing; GO:0034063,stress granule assembly; GO:0003674,molecular_function; GO:0003676,nucleic acid binding; GO:0003723,RNA binding; GO:0005488,binding; GO:0097159,organic cyclic compound binding; GO:1901363,heterocyclic compound binding; GO:0001666,response to hypoxia; G…	RNA recognition motif. (a.k.a. RRM, RBD, or RNP domain)	--	--	--
Cluster-100249.6	354	K13201 nucleolysin TIA-1/TIAR | (RefSeq) oligouridylate-binding protein 1-like (A)	--	hypothetical protein BHE74_00009871 [Ensete ventricosum]	UBP1C_ARATH RecName: Full=Oligouridylate-binding protein 1C; Short=AtUBP1c; AltName: Full=Polyuridylate-binding protein UBP1C; Short=Poly(U)-binding protein UBP1C;	A0A8B9B216_PHODC SubName: Full=oligouridylate-binding protein 1-like {ECO:0000313|RefSeq:XP_038990278.1};	FOG: RRM domain	GO:0005737,cytoplasm; GO:0005634,nucleus; GO:0003729,mRNA binding; GO:0071456,cellular response to hypoxia; GO:0006397,mRNA processing; GO:0034063,stress granule assembly; GO:0003674,molecular_function; GO:0003676,nucleic acid binding; GO:0003723,RNA binding; GO:0005488,binding; GO:0097159,organic cyclic compound binding; GO:1901363,heterocyclic compound binding; GO:0001666,response to hypoxia; G…	--	--	--	--
Cluster-100249.7	864	K13201 nucleolysin TIA-1/TIAR | (RefSeq) oligouridylate-binding protein 1-like isoform X1 (A)	--	PREDICTED: oligouridylate-binding protein 1-like isoform X3 [Musa acuminata subsp. malaccensis]	UBP1B_ARATH RecName: Full=Oligouridylate-binding protein 1B; Short=AtUBP1b; AltName: Full=Polyuridylate-binding protein UBP1B; Short=Poly(U)-binding protein UBP1B;	A0A804I660_MUSAM SubName: Full=(wild Malaysian banana) hypothetical protein {ECO:0000313|EMBL:CAG1862944.1};	FOG: RRM domain	GO:0005634,nucleus; GO:0003729,mRNA binding; GO:0006397,mRNA processing; GO:0003674,molecular_function; GO:0003676,nucleic acid binding; GO:0003723,RNA binding; GO:0005488,binding; GO:0097159,organic cyclic compound binding; GO:1901363,heterocyclic compound binding; GO:0006139,nucleobase-containing compound metabolic process; GO:0006396,RNA processing; GO:0006725,cellular aromatic compound metabo…	RNA recognition motif. (a.k.a. RRM, RBD, or RNP domain)	--	--	--
Cluster-100249.8	828	K13201 nucleolysin TIA-1/TIAR | (RefSeq) oligouridylate-binding protein 1-like isoform X1 (A)	--	PREDICTED: oligouridylate-binding protein 1-like isoform X3 [Musa acuminata subsp. malaccensis]	UBP1B_ARATH RecName: Full=Oligouridylate-binding protein 1B; Short=AtUBP1b; AltName: Full=Polyuridylate-binding protein UBP1B; Short=Poly(U)-binding protein UBP1B;	A0A804I660_MUSAM SubName: Full=(wild Malaysian banana) hypothetical protein {ECO:0000313|EMBL:CAG1862944.1};	FOG: RRM domain	GO:0005634,nucleus; GO:0003729,mRNA binding; GO:0006397,mRNA processing; GO:0003674,molecular_function; GO:0003676,nucleic acid binding; GO:0003723,RNA binding; GO:0005488,binding; GO:0097159,organic cyclic compound binding; GO:1901363,heterocyclic compound binding; GO:0006139,nucleobase-containing compound metabolic process; GO:0006396,RNA processing; GO:0006725,cellular aromatic compound metabo…	RNA recognition motif. (a.k.a. RRM, RBD, or RNP domain)	--	--	--
Cluster-100249.9	289	--	--	--	--	--	--	--	--	--	--	--
Cluster-10025.0	427	K10728 topoisomerase (DNA) II binding protein 1 | (RefSeq) LOW QUALITY PROTEIN: DNA topoisomerase 2-binding protein 1-A (A)	ko03440: Homologous recombination	retrovirus-related pol polyprotein from transposon tnt 1-94 [Cucumis melo var. makuwa]	--	A0A5A7U7A2_CUCME SubName: Full=Retrovirus-related pol polyprotein from transposon tnt 1-94 {ECO:0000313|EMBL:KAA0051168.1};	FOG: Transposon-encoded proteins with TYA, reverse transcriptase, integrase domains in various combinations	--	--	--	--	--
Cluster-100250.0	1024	--	--	--	--	--	--	--	--	--	--	--
Cluster-100251.0	787	--	--	--	--	--	--	--	--	--	--	--
Cluster-100252.0	1044	--	--	--	--	--	--	--	--	--	--	--
Cluster-100253.0	523	--	--	--	--	--	--	--	--	--	--	--
Cluster-100254.0	340	K00430 peroxidase [EC:1.11.1.7] | (RefSeq) peroxidase 20 (A)	ko00940: Phenylpropanoid biosynthesis; ko01100: Metabolic pathways; ko01110: Biosynthesis of secondary metabolites	peroxidase 20 [Asparagus officinalis]	PER20_ARATH RecName: Full=Peroxidase 20; Short=Atperox P20; EC=1.11.1.7; AltName: Full=ATP28a; Flags: Precursor;	A0A6I9S062_ELAGV RecName: Full=Peroxidase {ECO:0000256|RuleBase:RU362060}; EC=1.11.1.7 {ECO:0000256|RuleBase:RU362060};	--	GO:0005576,extracellular region; GO:0020037,heme binding; GO:0046872,metal ion binding; GO:0004601,peroxidase activity; GO:0042744,hydrogen peroxide catabolic process; GO:0006979,response to oxidative stress; GO:0003674,molecular_function; GO:0005488,binding; GO:0046906,tetrapyrrole binding; GO:0097159,organic cyclic compound binding; GO:1901363,heterocyclic compound binding; GO:0043167,ion bindi…	--	--	--	--
Cluster-100255.0	1437	--	--	--	--	--	--	--	--	--	--	--
Cluster-100256.0	371	--	--	--	--	--	--	--	--	--	--	--
Cluster-100257.0	1644	K14152 phosphoribosyl-ATP pyrophosphohydrolase / phosphoribosyl-AMP cyclohydrolase / histidinol dehydrogenase [EC:3.6.1.31 3.5.4.19 1.1.1.23] | (RefSeq) uncharacterized protein LOC111783531 (A)	ko00340: Histidine metabolism; ko01100: Metabolic pathways; ko01110: Biosynthesis of secondary metabolites; ko01230: Biosynthesis of amino acids	protein POLLENLESS 3-LIKE 2 [Asparagus officinalis]	MS5L2_ARATH RecName: Full=Protein POLLENLESS 3-LIKE 2 {ECO:0000303|Ref.5};	A0A5P1FNX2_ASPOF SubName: Full=Uncharacterized protein {ECO:0000313|EMBL:ONK80006.1};	--	GO:0005634,nucleus; GO:0007049,cell cycle; GO:0051301,cell division; GO:0008150,biological_process; GO:0009987,cellular process; GO:0005575,cellular_component; GO:0005622,intracellular anatomical structure; GO:0043226,organelle; GO:0043227,membrane-bounded organelle; GO:0043229,intracellular organelle; GO:0043231,intracellular membrane-bounded organelle; GO:0110165,cellular anatomical entity	Tetratricopeptide repeat	--	--	--
Cluster-100257.1	1695	K14152 phosphoribosyl-ATP pyrophosphohydrolase / phosphoribosyl-AMP cyclohydrolase / histidinol dehydrogenase [EC:3.6.1.31 3.5.4.19 1.1.1.23] | (RefSeq) uncharacterized protein LOC111783531 (A)	ko00340: Histidine metabolism; ko01100: Metabolic pathways; ko01110: Biosynthesis of secondary metabolites; ko01230: Biosynthesis of amino acids	protein POLLENLESS 3-LIKE 2 [Asparagus officinalis]	MS5L2_ARATH RecName: Full=Protein POLLENLESS 3-LIKE 2 {ECO:0000303|Ref.5};	A0A5P1FNX2_ASPOF SubName: Full=Uncharacterized protein {ECO:0000313|EMBL:ONK80006.1};	--	GO:0005634,nucleus; GO:0007049,cell cycle; GO:0051301,cell division; GO:0008150,biological_process; GO:0009987,cellular process; GO:0005575,cellular_component; GO:0005622,intracellular anatomical structure; GO:0043226,organelle; GO:0043227,membrane-bounded organelle; GO:0043229,intracellular organelle; GO:0043231,intracellular membrane-bounded organelle; GO:0110165,cellular anatomical entity	Tetratricopeptide repeat	--	--	--
Cluster-100258.0	2180	K14494 DELLA protein | (RefSeq) DELLA protein RGL1 (A)	ko04075: Plant hormone signal transduction	DELLA protein RGL1-like [Phoenix dactylifera]	RGL1_ARATH RecName: Full=DELLA protein RGL1; AltName: Full=GRAS family protein 9; Short=AtGRAS-9; AltName: Full=RGA-like protein 1; Short=RGA-like protein;	A0A8B7D575_PHODC SubName: Full=DELLA protein RGL1-like {ECO:0000313|RefSeq:XP_008813391.1};	--	GO:0005634,nucleus; GO:0003700,DNA-binding transcription factor activity; GO:0043565,sequence-specific DNA binding; GO:0003712,transcription coregulator activity; GO:0030154,cell differentiation; GO:0009908,flower development; GO:0009740,gibberellic acid mediated signaling pathway; GO:0042538,hyperosmotic salinity response; GO:0009867,jasmonic acid mediated signaling pathway; GO:0009938,negative …	GRAS domain family	GRAS	TF	GRAS
Cluster-100259.0	429	K02324 DNA polymerase epsilon subunit 1 [EC:2.7.7.7] | (RefSeq) DNA polymerase epsilon catalytic subunit A-like isoform X1 (A)	ko03030: DNA replication; ko03410: Base excision repair; ko03420: Nucleotide excision repair	hypothetical protein PVAP13_7KG000645 [Panicum virgatum]	DPOE2_ARATH RecName: Full=DNA polymerase epsilon catalytic subunit B; EC=2.7.7.7 {ECO:0000250|UniProtKB:P15436}; AltName: Full=DNA polymerase 2 b; Short=AtPOL2b; AltName: Full=DNA polymerase II subunit b; AltName: Full=Protein TILTED 2;	A0A3L6FXY0_MAIZE RecName: Full=DNA polymerase epsilon catalytic subunit {ECO:0000256|RuleBase:RU365029}; EC=2.7.7.7 {ECO:0000256|RuleBase:RU365029};	DNA polymerase epsilon, catalytic subunit A	GO:0008622,epsilon DNA polymerase complex; GO:0051539,4 iron, 4 sulfur cluster binding; GO:0003677,DNA binding; GO:0003887,DNA-directed DNA polymerase activity; GO:0000166,nucleotide binding; GO:0008310,single-stranded DNA 3'-5' exodeoxyribonuclease activity; GO:0008270,zinc ion binding; GO:0006287,base-excision repair, gap-filling; GO:0045004,DNA replication proofreading; GO:0006272,leading stra…	--	--	--	--
Cluster-100259.1	905	K02324 DNA polymerase epsilon subunit 1 [EC:2.7.7.7] | (RefSeq) DNA polymerase epsilon catalytic subunit A-like isoform X1 (A)	ko03030: DNA replication; ko03410: Base excision repair; ko03420: Nucleotide excision repair	hypothetical protein PVAP13_7KG000645 [Panicum virgatum]	DPOE2_ARATH RecName: Full=DNA polymerase epsilon catalytic subunit B; EC=2.7.7.7 {ECO:0000250|UniProtKB:P15436}; AltName: Full=DNA polymerase 2 b; Short=AtPOL2b; AltName: Full=DNA polymerase II subunit b; AltName: Full=Protein TILTED 2;	A0A3L6FXY0_MAIZE RecName: Full=DNA polymerase epsilon catalytic subunit {ECO:0000256|RuleBase:RU365029}; EC=2.7.7.7 {ECO:0000256|RuleBase:RU365029};	DNA polymerase epsilon, catalytic subunit A	GO:0008622,epsilon DNA polymerase complex; GO:0051539,4 iron, 4 sulfur cluster binding; GO:0003677,DNA binding; GO:0003887,DNA-directed DNA polymerase activity; GO:0000166,nucleotide binding; GO:0008310,single-stranded DNA 3'-5' exodeoxyribonuclease activity; GO:0008270,zinc ion binding; GO:0006287,base-excision repair, gap-filling; GO:0045004,DNA replication proofreading; GO:0006272,leading stra…	--	--	--	--
Cluster-10026.0	1370	--	--	--	--	--	--	--	--	--	--	--
Cluster-100260.0	1836	K07904 Ras-related protein Rab-11A | (RefSeq) ras-related protein RABA1f (A)	ko04144: Endocytosis	ras-related protein RABA1f [Tripterygium wilfordii]	RAA1F_ARATH RecName: Full=Ras-related protein RABA1f; Short=AtRABA1f;	A0A7J7CB72_TRIWF SubName: Full=RAB GTPase A1F {ECO:0000313|EMBL:KAF5731398.1};	GTPase Rab11/YPT3, small G protein superfamily	GO:0005768,endosome; GO:0005886,plasma membrane; GO:0005525,GTP binding; GO:0003924,GTPase activity; GO:0015031,protein transport; GO:0016192,vesicle-mediated transport; GO:0000166,nucleotide binding; GO:0001882,nucleoside binding; GO:0001883,purine nucleoside binding; GO:0003674,molecular_function; GO:0005488,binding; GO:0017076,purine nucleotide binding; GO:0019001,guanyl nucleotide binding; GO…	--	--	--	--
Cluster-100260.1	917	K07904 Ras-related protein Rab-11A | (RefSeq) ras-related protein RABA1f (A)	ko04144: Endocytosis	ras-related protein RABA1f [Tripterygium wilfordii]	RAA1F_ARATH RecName: Full=Ras-related protein RABA1f; Short=AtRABA1f;	A0A7J7CB72_TRIWF SubName: Full=RAB GTPase A1F {ECO:0000313|EMBL:KAF5731398.1};	GTPase Rab11/YPT3, small G protein superfamily	GO:0005768,endosome; GO:0005886,plasma membrane; GO:0005525,GTP binding; GO:0003924,GTPase activity; GO:0015031,protein transport; GO:0016192,vesicle-mediated transport; GO:0000166,nucleotide binding; GO:0001882,nucleoside binding; GO:0001883,purine nucleoside binding; GO:0003674,molecular_function; GO:0005488,binding; GO:0017076,purine nucleotide binding; GO:0019001,guanyl nucleotide binding; GO…	Ras family	--	--	--
Cluster-100261.0	784	--	--	Integrase catalytic domain-containing protein [Citrus sinensis]	--	A0A6L2JIK7_TANCI SubName: Full=Retrovirus-related Pol polyprotein from transposon TNT 1-94 {ECO:0000313|EMBL:GEU36569.1};	--	--	--	--	--	--
Cluster-100262.0	2043	--	--	--	--	--	--	--	--	--	--	--
Cluster-100263.0	883	K13415 protein brassinosteroid insensitive 1 [EC:2.7.10.1 2.7.11.1] | (RefSeq) uncharacterized protein LOC103413440 isoform X1 (A)	ko04075: Plant hormone signal transduction	squamosa promoter-binding-like protein 7 [Cocos nucifera]	SPL7_ORYSI RecName: Full=Squamosa promoter-binding-like protein 7;	A0A8K0IM22_COCNU SubName: Full=Squamosa promoter-binding-like protein 7 {ECO:0000313|EMBL:KAG1362162.1};	--	GO:0005634,nucleus; GO:0003677,DNA binding; GO:0046872,metal ion binding; GO:0003674,molecular_function; GO:0003676,nucleic acid binding; GO:0005488,binding; GO:0097159,organic cyclic compound binding; GO:1901363,heterocyclic compound binding; GO:0043167,ion binding; GO:0043169,cation binding; GO:0005575,cellular_component; GO:0005622,intracellular anatomical structure; GO:0043226,organelle; GO:0…	SBP domain	SBP	TF	SBP
Cluster-100263.1	891	K13415 protein brassinosteroid insensitive 1 [EC:2.7.10.1 2.7.11.1] | (RefSeq) uncharacterized protein LOC103413440 isoform X1 (A)	ko04075: Plant hormone signal transduction	squamosa promoter-binding-like protein 7 [Cocos nucifera]	SPL7_ORYSI RecName: Full=Squamosa promoter-binding-like protein 7;	A0A8K0IM22_COCNU SubName: Full=Squamosa promoter-binding-like protein 7 {ECO:0000313|EMBL:KAG1362162.1};	--	GO:0005634,nucleus; GO:0003677,DNA binding; GO:0046872,metal ion binding; GO:0003674,molecular_function; GO:0003676,nucleic acid binding; GO:0005488,binding; GO:0097159,organic cyclic compound binding; GO:1901363,heterocyclic compound binding; GO:0043167,ion binding; GO:0043169,cation binding; GO:0005575,cellular_component; GO:0005622,intracellular anatomical structure; GO:0043226,organelle; GO:0…	SBP domain	SBP	TF	SBP
Cluster-100264.0	336	--	--	--	--	--	--	--	--	--	--	--
Cluster-100265.0	1069	--	--	--	--	--	--	--	--	--	--	--
Cluster-100266.0	367	--	--	LOW QUALITY PROTEIN: uncharacterized protein LOC110412945 [Herrania umbratica]	--	A0A6J0ZX64_9ROSI SubName: Full=LOW QUALITY PROTEIN: uncharacterized protein LOC110412945 {ECO:0000313|RefSeq:XP_021279280.1};	FOG: Transposon-encoded proteins with TYA, reverse transcriptase, integrase domains in various combinations	--	--	--	--	--
Cluster-100267.0	308	--	--	uncharacterized protein LOC109830961 [Asparagus officinalis]	--	A0A1Q3BY19_CEPFO SubName: Full=Dimer_Tnp_hAT domain-containing protein {ECO:0000313|EMBL:GAV72769.1}; Flags: Fragment;	--	--	--	--	--	--
Cluster-100268.0	985	--	--	SGNH hydrolase protein [Dioscorea alata]	CAES_ARATH RecName: Full=Probable carbohydrate esterase At4g34215; EC=3.1.-.-;	A0A8K0IL77_COCNU SubName: Full=Putative carbohydrate esterase {ECO:0000313|EMBL:KAG1361891.1};	--	GO:0005829,cytosol; GO:0016787,hydrolase activity; GO:0003674,molecular_function; GO:0003824,catalytic activity; GO:0005575,cellular_component; GO:0005622,intracellular anatomical structure; GO:0005737,cytoplasm; GO:0110165,cellular anatomical entity	Carbohydrate esterase, sialic acid-specific acetylesterase	--	--	--
Cluster-100269.0	837	--	--	--	--	--	--	--	--	--	--	--
Cluster-10027.0	713	--	--	--	--	--	--	--	--	--	--	--
Cluster-10027.1	612	--	--	--	--	--	--	--	--	--	--	--
Cluster-100270.0	939	--	--	--	--	--	--	--	--	--	--	--
Cluster-100271.0	1097	--	--	--	--	--	--	--	--	--	--	--
Cluster-100272.0	1915	--	--	--	--	--	--	--	--	--	--	--
Cluster-100273.0	388	--	--	--	--	--	--	--	--	--	--	--
Cluster-100274.0	1607	--	--	--	--	--	--	--	--	--	--	--
Cluster-100275.0	1633	K20891 beta-glucuronosyltransferase [EC:2.4.1.-] | (RefSeq) beta-glucuronosyltransferase GlcAT14A-like (A)	--	PREDICTED: beta-glucuronosyltransferase GlcAT14A [Musa acuminata subsp. malaccensis]	GT14A_ARATH RecName: Full=Beta-glucuronosyltransferase GlcAT14A {ECO:0000305}; EC=2.4.1.- {ECO:0000305}; AltName: Full=GT14 family glucuronic acid transferase 1 {ECO:0000305}; Short=AtGlcAT14A {ECO:0000303|PubMed:24128328};	A0A804IRY1_MUSAM SubName: Full=(wild Malaysian banana) hypothetical protein {ECO:0000313|EMBL:CAG1842862.1};	Branching enzyme	GO:0005794,Golgi apparatus; GO:0000139,Golgi membrane; GO:0016021,integral component of membrane; GO:0015020,glucuronosyltransferase activity; GO:0009826,unidimensional cell growth; GO:0003674,molecular_function; GO:0003824,catalytic activity; GO:0008194,UDP-glycosyltransferase activity; GO:0016740,transferase activity; GO:0016757,transferase activity, transferring glycosyl groups; GO:0016758,tra…	Core-2/I-Branching enzyme	--	--	--
Cluster-100276.0	487	--	--	--	--	--	--	--	--	--	--	--
Cluster-100276.1	725	--	--	--	--	--	--	--	--	--	--	--
Cluster-100276.2	726	--	--	--	--	--	--	--	--	--	--	--
Cluster-100276.3	487	--	--	--	--	--	--	--	--	--	--	--
Cluster-100276.4	630	--	--	--	--	--	--	--	--	--	--	--
Cluster-100277.0	677	K00297 methylenetetrahydrofolate reductase (NADH) [EC:1.5.1.54] | (RefSeq) probable methylenetetrahydrofolate reductase (A)	ko00670: One carbon pool by folate; ko01100: Metabolic pathways; ko01200: Carbon metabolism	probable methylenetetrahydrofolate reductase [Asparagus officinalis]	MTHR_ORYSJ RecName: Full=Probable methylenetetrahydrofolate reductase; EC=1.5.1.20;	A0A5P1FS56_ASPOF RecName: Full=Methylenetetrahydrofolate reductase (NAD(P)H) {ECO:0000256|ARBA:ARBA00012871}; EC=1.5.1.20 {ECO:0000256|ARBA:ARBA00012871};	5,10-methylenetetrahydrofolate reductase	GO:0005829,cytosol; GO:0071949,FAD binding; GO:0004489,methylenetetrahydrofolate reductase (NAD(P)H) activity; GO:0106312,methylenetetrahydrofolate reductase NADH activity; GO:0106313,methylenetetrahydrofolate reductase NADPH activity; GO:0009086,methionine biosynthetic process; GO:0035999,tetrahydrofolate interconversion; GO:0000166,nucleotide binding; GO:0003674,molecular_function; GO:0005488,b…	Methylenetetrahydrofolate reductase	--	--	--
Cluster-100277.1	1033	K00297 methylenetetrahydrofolate reductase (NADH) [EC:1.5.1.54] | (RefSeq) probable methylenetetrahydrofolate reductase (A)	ko00670: One carbon pool by folate; ko01100: Metabolic pathways; ko01200: Carbon metabolism	probable methylenetetrahydrofolate reductase [Asparagus officinalis]	MTHR1_ARATH RecName: Full=Methylenetetrahydrofolate reductase 1; Short=AtMTHFR1; EC=1.5.1.20;	A0A5P1FS56_ASPOF RecName: Full=Methylenetetrahydrofolate reductase (NAD(P)H) {ECO:0000256|ARBA:ARBA00012871}; EC=1.5.1.20 {ECO:0000256|ARBA:ARBA00012871};	5,10-methylenetetrahydrofolate reductase	GO:0005829,cytosol; GO:0071949,FAD binding; GO:0004489,methylenetetrahydrofolate reductase (NAD(P)H) activity; GO:0106312,methylenetetrahydrofolate reductase NADH activity; GO:0106313,methylenetetrahydrofolate reductase NADPH activity; GO:0009086,methionine biosynthetic process; GO:0035999,tetrahydrofolate interconversion; GO:0000166,nucleotide binding; GO:0003674,molecular_function; GO:0005488,b…	Methylenetetrahydrofolate reductase	--	--	--
Cluster-100277.2	1318	K00297 methylenetetrahydrofolate reductase (NADH) [EC:1.5.1.54] | (RefSeq) methylenetetrahydrofolate reductase 2-like (A)	ko00670: One carbon pool by folate; ko01100: Metabolic pathways; ko01200: Carbon metabolism	methylenetetrahydrofolate reductase (NADPH) protein [Dioscorea alata]	MTHR_ORYSJ RecName: Full=Probable methylenetetrahydrofolate reductase; EC=1.5.1.20;	A0A6I9RDD4_ELAGV RecName: Full=Methylenetetrahydrofolate reductase (NAD(P)H) {ECO:0000256|ARBA:ARBA00012871}; EC=1.5.1.20 {ECO:0000256|ARBA:ARBA00012871};	5,10-methylenetetrahydrofolate reductase	GO:0005829,cytosol; GO:0071949,FAD binding; GO:0004489,methylenetetrahydrofolate reductase (NAD(P)H) activity; GO:0106312,methylenetetrahydrofolate reductase NADH activity; GO:0106313,methylenetetrahydrofolate reductase NADPH activity; GO:0009086,methionine biosynthetic process; GO:0035999,tetrahydrofolate interconversion; GO:0000166,nucleotide binding; GO:0003674,molecular_function; GO:0005488,b…	Methylenetetrahydrofolate reductase	--	--	--
Cluster-100277.3	1251	K00297 methylenetetrahydrofolate reductase (NADH) [EC:1.5.1.54] | (RefSeq) methylenetetrahydrofolate reductase 2-like (A)	ko00670: One carbon pool by folate; ko01100: Metabolic pathways; ko01200: Carbon metabolism	methylenetetrahydrofolate reductase (NADPH) protein [Dioscorea alata]	MTHR_ORYSJ RecName: Full=Probable methylenetetrahydrofolate reductase; EC=1.5.1.20;	A0A6I9RDD4_ELAGV RecName: Full=Methylenetetrahydrofolate reductase (NAD(P)H) {ECO:0000256|ARBA:ARBA00012871}; EC=1.5.1.20 {ECO:0000256|ARBA:ARBA00012871};	5,10-methylenetetrahydrofolate reductase	GO:0005829,cytosol; GO:0071949,FAD binding; GO:0004489,methylenetetrahydrofolate reductase (NAD(P)H) activity; GO:0106312,methylenetetrahydrofolate reductase NADH activity; GO:0106313,methylenetetrahydrofolate reductase NADPH activity; GO:0009086,methionine biosynthetic process; GO:0035999,tetrahydrofolate interconversion; GO:0000166,nucleotide binding; GO:0003674,molecular_function; GO:0005488,b…	Methylenetetrahydrofolate reductase	--	--	--
Cluster-100277.4	912	K00297 methylenetetrahydrofolate reductase (NADH) [EC:1.5.1.54] | (RefSeq) probable methylenetetrahydrofolate reductase (A)	ko00670: One carbon pool by folate; ko01100: Metabolic pathways; ko01200: Carbon metabolism	probable methylenetetrahydrofolate reductase [Asparagus officinalis]	MTHR1_ARATH RecName: Full=Methylenetetrahydrofolate reductase 1; Short=AtMTHFR1; EC=1.5.1.20;	A0A5P1FS56_ASPOF RecName: Full=Methylenetetrahydrofolate reductase (NAD(P)H) {ECO:0000256|ARBA:ARBA00012871}; EC=1.5.1.20 {ECO:0000256|ARBA:ARBA00012871};	5,10-methylenetetrahydrofolate reductase	GO:0005829,cytosol; GO:0071949,FAD binding; GO:0004489,methylenetetrahydrofolate reductase (NAD(P)H) activity; GO:0106312,methylenetetrahydrofolate reductase NADH activity; GO:0106313,methylenetetrahydrofolate reductase NADPH activity; GO:0009086,methionine biosynthetic process; GO:0035999,tetrahydrofolate interconversion; GO:0000166,nucleotide binding; GO:0003674,molecular_function; GO:0005488,b…	Methylenetetrahydrofolate reductase	--	--	--
Cluster-100277.5	1327	K00297 methylenetetrahydrofolate reductase (NADH) [EC:1.5.1.54] | (RefSeq) methylenetetrahydrofolate reductase 2-like (A)	ko00670: One carbon pool by folate; ko01100: Metabolic pathways; ko01200: Carbon metabolism	methylenetetrahydrofolate reductase (NADPH) protein [Dioscorea alata]	MTHR2_ARATH RecName: Full=Methylenetetrahydrofolate reductase 2; Short=AtMTHFR2; EC=1.5.1.20;	A0A6I9RDD4_ELAGV RecName: Full=Methylenetetrahydrofolate reductase (NAD(P)H) {ECO:0000256|ARBA:ARBA00012871}; EC=1.5.1.20 {ECO:0000256|ARBA:ARBA00012871};	5,10-methylenetetrahydrofolate reductase	GO:0005829,cytosol; GO:0071949,FAD binding; GO:0004489,methylenetetrahydrofolate reductase (NAD(P)H) activity; GO:0106312,methylenetetrahydrofolate reductase NADH activity; GO:0106313,methylenetetrahydrofolate reductase NADPH activity; GO:0009086,methionine biosynthetic process; GO:0035999,tetrahydrofolate interconversion; GO:0000166,nucleotide binding; GO:0003674,molecular_function; GO:0005488,b…	Methylenetetrahydrofolate reductase	--	--	--
Cluster-100277.6	912	K00297 methylenetetrahydrofolate reductase (NADH) [EC:1.5.1.54] | (RefSeq) probable methylenetetrahydrofolate reductase (A)	ko00670: One carbon pool by folate; ko01100: Metabolic pathways; ko01200: Carbon metabolism	probable methylenetetrahydrofolate reductase [Asparagus officinalis]	MTHR1_ARATH RecName: Full=Methylenetetrahydrofolate reductase 1; Short=AtMTHFR1; EC=1.5.1.20;	A0A5P1FS56_ASPOF RecName: Full=Methylenetetrahydrofolate reductase (NAD(P)H) {ECO:0000256|ARBA:ARBA00012871}; EC=1.5.1.20 {ECO:0000256|ARBA:ARBA00012871};	5,10-methylenetetrahydrofolate reductase	GO:0005829,cytosol; GO:0071949,FAD binding; GO:0004489,methylenetetrahydrofolate reductase (NAD(P)H) activity; GO:0106312,methylenetetrahydrofolate reductase NADH activity; GO:0106313,methylenetetrahydrofolate reductase NADPH activity; GO:0009086,methionine biosynthetic process; GO:0035999,tetrahydrofolate interconversion; GO:0000166,nucleotide binding; GO:0003674,molecular_function; GO:0005488,b…	Methylenetetrahydrofolate reductase	--	--	--
Cluster-100278.0	386	--	--	--	--	--	--	--	--	--	--	--
Cluster-100279.0	685	--	--	--	--	--	--	--	--	--	--	--
Cluster-10028.0	363	--	--	--	--	--	--	--	--	--	--	--
Cluster-100280.0	1287	K25731 VPS35 endosomal protein-sorting factor-like | (RefSeq) UPF0505 protein C16orf62 homolog isoform X1 (A)	--	probable WRKY transcription factor 40 [Asparagus officinalis]	WRK40_ARATH RecName: Full=Probable WRKY transcription factor 40 {ECO:0000303|Ref.1}; AltName: Full=WRKY DNA-binding protein 40 {ECO:0000303|Ref.1};	A0A8B7C9D0_PHODC SubName: Full=probable WRKY transcription factor 40 {ECO:0000313|RefSeq:XP_008794347.2};	--	GO:0005634,nucleus; GO:0003700,DNA-binding transcription factor activity; GO:0000976,transcription regulatory region sequence-specific DNA binding; GO:0042742,defense response to bacterium; GO:0050832,defense response to fungus; GO:0045892,negative regulation of transcription, DNA-templated; GO:0031347,regulation of defense response; GO:0002237,response to molecule of bacterial origin; GO:0009751…	WRKY DNA -binding domain	WRKY	TF	WRKY
Cluster-100281.0	1251	K10999 cellulose synthase A [EC:2.4.1.12] | (RefSeq) cellulose synthase A catalytic subunit 9 [UDP-forming] (A)	--	putative Cellulose synthase A catalytic subunit 9 [UDP-forming]	CESA7_ARATH RecName: Full=Cellulose synthase A catalytic subunit 7 [UDP-forming] {ECO:0000303|PubMed:11178255, ECO:0000303|PubMed:12805608}; Short=AtCesA7 {ECO:0000303|PubMed:11178255, ECO:0000303|PubMed:12805608}; EC=2.4.1.12; AltName: Full=Protein FRAGILE FIBER 5 {ECO:0000303|PubMed:12805608}; AltName: Full=Protein IRREGULAR XYLEM 3 {ECO:0000303|PubMed:10330464}; Short=AtIRX3 {ECO:0000303|PubMe…	A0A5B7AK67_DAVIN SubName: Full=Putative cellulose synthase A catalytic subunit 7 [UDP-forming]-like {ECO:0000313|EMBL:MPA55483.1}; EC=2.4.1.12 {ECO:0000313|EMBL:MPA55483.1};	--	GO:0010330,cellulose synthase complex; GO:0009507,chloroplast; GO:0016021,integral component of membrane; GO:0005886,plasma membrane; GO:0016760,cellulose synthase (UDP-forming) activity; GO:0016759,cellulose synthase activity; GO:0046872,metal ion binding; GO:0030244,cellulose biosynthetic process; GO:0009832,plant-type cell wall biogenesis; GO:0009833,plant-type primary cell wall biogenesis; GO…	Cellulose synthase	--	--	--
Cluster-100282.0	883	--	--	--	--	--	--	--	--	--	--	--
Cluster-100283.0	1609	--	--	--	--	--	--	--	--	--	--	--
Cluster-100284.0	689	K22824 pre-mRNA-splicing regulator WTAP | (RefSeq) FKBP12-interacting protein of 37 kDa (A)	--	FKBP12-interacting protein of 37 kDa [Asparagus officinalis]	--	A0A5P1FSI0_ASPOF SubName: Full=Uncharacterized protein {ECO:0000313|EMBL:ONK81275.1};	--	--	Coiled-coil regions of plant-specific actin-binding protein	--	--	--
Cluster-100284.1	1465	K22824 pre-mRNA-splicing regulator WTAP | (RefSeq) FKBP12-interacting protein of 37 kDa isoform X2 (A)	--	FKBP12-interacting protein of 37 kDa isoform X2 [Phoenix dactylifera]	FIP37_ARATH RecName: Full=FKBP12-interacting protein of 37 kDa {ECO:0000305}; Short=FIP-37 {ECO:0000305}; AltName: Full=Immunophilin-interacting protein AtFIP37 {ECO:0000303|PubMed:9807817}; AltName: Full=Protein WTAP homolog {ECO:0000303|PubMed:28503769};	A0A8B7MTA1_PHODC SubName: Full=FKBP12-interacting protein of 37 kDa isoform X2 {ECO:0000313|RefSeq:XP_017697463.2};	Splicing regulator	GO:0016607,nuclear speck; GO:0005634,nucleus; GO:0009506,plasmodesma; GO:0043621,protein self-association; GO:0010073,meristem maintenance; GO:0080009,mRNA methylation; GO:0006397,mRNA processing; GO:0000381,regulation of alternative mRNA splicing, via spliceosome; GO:0001510,RNA methylation; GO:0008380,RNA splicing; GO:0003674,molecular_function; GO:0005488,binding; GO:0005515,protein binding; G…	WTAP/Mum2p family	--	--	--
Cluster-100285.0	1604	--	--	--	--	--	--	--	--	--	--	--
Cluster-100285.1	301	--	--	--	--	--	--	--	--	--	--	--
Cluster-100285.10	1489	--	--	uncharacterized protein A4U43_C04F16560 [Asparagus officinalis]	CSU2_ARATH RecName: Full=Protein COP1 SUPPRESSOR 2 {ECO:0000303|PubMed:26714275};	A0A5P1F1E3_ASPOF SubName: Full=Uncharacterized protein {ECO:0000313|EMBL:ONK72175.1};	--	GO:0016607,nuclear speck; GO:0005681,spliceosomal complex; GO:0000398,mRNA splicing, via spliceosome; GO:1904667,negative regulation of ubiquitin protein ligase activity; GO:0080022,primary root development; GO:0010099,regulation of photomorphogenesis; GO:0055121,response to high fluence blue light stimulus by blue high-fluence system; GO:0000375,RNA splicing, via transesterification reactions; G…	WD domain, G-beta repeat	--	--	--
Cluster-100285.11	460	--	--	--	--	--	--	--	--	--	--	--
Cluster-100285.12	364	--	--	--	--	--	--	--	--	--	--	--
Cluster-100285.13	392	--	--	Hepatocellular carcinoma-associated antigen [Parasponia andersonii]	CSU2_ARATH RecName: Full=Protein COP1 SUPPRESSOR 2 {ECO:0000303|PubMed:26714275};	A0A2P5B382_PARAD SubName: Full=Hepatocellular carcinoma-associated antigen {ECO:0000313|EMBL:PON43258.1};	--	GO:0016607,nuclear speck; GO:0005681,spliceosomal complex; GO:0000398,mRNA splicing, via spliceosome; GO:1904667,negative regulation of ubiquitin protein ligase activity; GO:0080022,primary root development; GO:0010099,regulation of photomorphogenesis; GO:0055121,response to high fluence blue light stimulus by blue high-fluence system; GO:0000375,RNA splicing, via transesterification reactions; G…	--	--	--	--
Cluster-100285.14	787	--	--	--	--	--	--	--	--	--	--	--
Cluster-100285.15	423	--	--	--	--	A0A1S8AD13_CITLI SubName: Full=Uncharacterized protein {ECO:0000313|EMBL:JAV45335.1}; Flags: Fragment;	--	--	--	--	--	--
Cluster-100285.16	527	--	--	--	--	--	--	--	--	--	--	--
Cluster-100285.17	882	--	--	--	--	--	--	--	--	--	--	--
Cluster-100285.18	607	--	--	--	--	--	--	--	--	--	--	--
Cluster-100285.19	580	--	--	--	--	--	--	--	--	--	--	--
Cluster-100285.2	478	--	--	--	--	--	--	--	--	--	--	--
Cluster-100285.20	867	--	--	--	--	--	--	--	--	--	--	--
Cluster-100285.21	787	--	--	--	--	--	--	--	--	--	--	--
Cluster-100285.22	553	--	--	--	--	--	--	--	--	--	--	--
Cluster-100285.23	639	--	--	--	--	--	--	--	--	--	--	--
Cluster-100285.24	431	--	--	--	--	--	--	--	--	--	--	--
Cluster-100285.25	743	--	--	sec1 family domain-containing protein MIP3 isoform X1 [Elaeis guineensis]	MIP3_ARATH RecName: Full=Sec1 family domain-containing protein MIP3 {ECO:0000305}; AltName: Full=MAG2-interacting protein 3 {ECO:0000303|PubMed:24118572};	A0A6I9RQR8_ELAGV SubName: Full=sec1 family domain-containing protein MIP3 isoform X1 {ECO:0000313|RefSeq:XP_010930904.1};	--	GO:0033263,CORVET complex; GO:0005789,endoplasmic reticulum membrane; GO:0005773,vacuole; GO:0006886,intracellular protein transport; GO:0051604,protein maturation; GO:0006624,vacuolar protein processing; GO:0016192,vesicle-mediated transport; GO:0006810,transport; GO:0006811,ion transport; GO:0006820,anion transport; GO:0008104,protein localization; GO:0008150,biological_process; GO:0009987,cell…	--	--	--	--
Cluster-100285.26	682	--	--	sec1 family domain-containing protein MIP3 isoform X1 [Elaeis guineensis]	MIP3_ARATH RecName: Full=Sec1 family domain-containing protein MIP3 {ECO:0000305}; AltName: Full=MAG2-interacting protein 3 {ECO:0000303|PubMed:24118572};	A0A6I9RQR8_ELAGV SubName: Full=sec1 family domain-containing protein MIP3 isoform X1 {ECO:0000313|RefSeq:XP_010930904.1};	--	GO:0033263,CORVET complex; GO:0005789,endoplasmic reticulum membrane; GO:0005773,vacuole; GO:0006886,intracellular protein transport; GO:0051604,protein maturation; GO:0006624,vacuolar protein processing; GO:0016192,vesicle-mediated transport; GO:0006810,transport; GO:0006811,ion transport; GO:0006820,anion transport; GO:0008104,protein localization; GO:0008150,biological_process; GO:0009987,cell…	--	--	--	--
Cluster-100285.27	729	--	--	sec1 family domain-containing protein MIP3 isoform X1 [Elaeis guineensis]	MIP3_ARATH RecName: Full=Sec1 family domain-containing protein MIP3 {ECO:0000305}; AltName: Full=MAG2-interacting protein 3 {ECO:0000303|PubMed:24118572};	A0A6I9RQR8_ELAGV SubName: Full=sec1 family domain-containing protein MIP3 isoform X1 {ECO:0000313|RefSeq:XP_010930904.1};	--	GO:0033263,CORVET complex; GO:0005789,endoplasmic reticulum membrane; GO:0005773,vacuole; GO:0006886,intracellular protein transport; GO:0051604,protein maturation; GO:0006624,vacuolar protein processing; GO:0016192,vesicle-mediated transport; GO:0006810,transport; GO:0006811,ion transport; GO:0006820,anion transport; GO:0008104,protein localization; GO:0008150,biological_process; GO:0009987,cell…	--	--	--	--
Cluster-100285.28	647	--	--	sec1 family domain-containing protein MIP3 isoform X1 [Elaeis guineensis]	MIP3_ARATH RecName: Full=Sec1 family domain-containing protein MIP3 {ECO:0000305}; AltName: Full=MAG2-interacting protein 3 {ECO:0000303|PubMed:24118572};	A0A6I9RQR8_ELAGV SubName: Full=sec1 family domain-containing protein MIP3 isoform X1 {ECO:0000313|RefSeq:XP_010930904.1};	--	GO:0033263,CORVET complex; GO:0005789,endoplasmic reticulum membrane; GO:0005773,vacuole; GO:0006886,intracellular protein transport; GO:0051604,protein maturation; GO:0006624,vacuolar protein processing; GO:0016192,vesicle-mediated transport; GO:0006810,transport; GO:0006811,ion transport; GO:0006820,anion transport; GO:0008104,protein localization; GO:0008150,biological_process; GO:0009987,cell…	--	--	--	--
Cluster-100285.29	682	--	--	sec1 family domain-containing protein MIP3 isoform X1 [Elaeis guineensis]	MIP3_ARATH RecName: Full=Sec1 family domain-containing protein MIP3 {ECO:0000305}; AltName: Full=MAG2-interacting protein 3 {ECO:0000303|PubMed:24118572};	A0A6I9RQR8_ELAGV SubName: Full=sec1 family domain-containing protein MIP3 isoform X1 {ECO:0000313|RefSeq:XP_010930904.1};	--	GO:0033263,CORVET complex; GO:0005789,endoplasmic reticulum membrane; GO:0005773,vacuole; GO:0006886,intracellular protein transport; GO:0051604,protein maturation; GO:0006624,vacuolar protein processing; GO:0016192,vesicle-mediated transport; GO:0006810,transport; GO:0006811,ion transport; GO:0006820,anion transport; GO:0008104,protein localization; GO:0008150,biological_process; GO:0009987,cell…	--	--	--	--
Cluster-100285.3	4694	--	--	uncharacterized protein A4U43_C04F16560 [Asparagus officinalis]	--	A0A5P1F1E3_ASPOF SubName: Full=Uncharacterized protein {ECO:0000313|EMBL:ONK72175.1};	--	--	WD domain, G-beta repeat	--	--	--
Cluster-100285.30	743	--	--	sec1 family domain-containing protein MIP3 isoform X1 [Elaeis guineensis]	MIP3_ARATH RecName: Full=Sec1 family domain-containing protein MIP3 {ECO:0000305}; AltName: Full=MAG2-interacting protein 3 {ECO:0000303|PubMed:24118572};	A0A6I9RQR8_ELAGV SubName: Full=sec1 family domain-containing protein MIP3 isoform X1 {ECO:0000313|RefSeq:XP_010930904.1};	--	GO:0033263,CORVET complex; GO:0005789,endoplasmic reticulum membrane; GO:0005773,vacuole; GO:0006886,intracellular protein transport; GO:0051604,protein maturation; GO:0006624,vacuolar protein processing; GO:0016192,vesicle-mediated transport; GO:0006810,transport; GO:0006811,ion transport; GO:0006820,anion transport; GO:0008104,protein localization; GO:0008150,biological_process; GO:0009987,cell…	--	--	--	--
Cluster-100285.4	1527	--	--	LOW QUALITY PROTEIN: uncharacterized protein LOC109837428 [Asparagus officinalis]	--	A0A6I9RZZ0_ELAGV SubName: Full=uncharacterized protein LOC105054927 {ECO:0000313|RefSeq:XP_010934880.1};	--	--	--	--	--	--
Cluster-100285.5	1699	--	--	uncharacterized protein A4U43_C04F16560 [Asparagus officinalis]	--	A0A5P1F1E3_ASPOF SubName: Full=Uncharacterized protein {ECO:0000313|EMBL:ONK72175.1};	--	--	WD domain, G-beta repeat	--	--	--
Cluster-100285.6	1465	--	--	uncharacterized protein A4U43_C04F16560 [Asparagus officinalis]	--	A0A5P1F1E3_ASPOF SubName: Full=Uncharacterized protein {ECO:0000313|EMBL:ONK72175.1};	--	--	WD domain, G-beta repeat	--	--	--
Cluster-100285.7	1440	--	--	uncharacterized protein A4U43_C04F16560 [Asparagus officinalis]	--	A0A5P1F1E3_ASPOF SubName: Full=Uncharacterized protein {ECO:0000313|EMBL:ONK72175.1};	--	--	WD domain, G-beta repeat	--	--	--
Cluster-100285.8	4884	--	--	uncharacterized protein A4U43_C04F16560 [Asparagus officinalis]	--	A0A5P1F1E3_ASPOF SubName: Full=Uncharacterized protein {ECO:0000313|EMBL:ONK72175.1};	--	--	WD domain, G-beta repeat	--	--	--
Cluster-100285.9	4417	--	--	uncharacterized protein A4U43_C04F16560 [Asparagus officinalis]	--	A0A5P1F1E3_ASPOF SubName: Full=Uncharacterized protein {ECO:0000313|EMBL:ONK72175.1};	--	--	WD domain, G-beta repeat	--	--	--
Cluster-100286.0	290	--	--	--	--	--	--	--	--	--	--	--
Cluster-100287.0	3147	--	--	endoplasmic reticulum metallopeptidase 1 [Asparagus officinalis]	--	A0A8B9A803_PHODC SubName: Full=endoplasmic reticulum metallopeptidase 1 isoform X1 {ECO:0000313|RefSeq:XP_038982796.1};	Aminopeptidases of the M20 family	--	Peptidase family M28	--	--	--
Cluster-100287.1	2496	--	--	endoplasmic reticulum metallopeptidase 1 [Asparagus officinalis]	--	A0A8B9A803_PHODC SubName: Full=endoplasmic reticulum metallopeptidase 1 isoform X1 {ECO:0000313|RefSeq:XP_038982796.1};	Aminopeptidases of the M20 family	--	Peptidase family M28	--	--	--
Cluster-100287.2	3147	--	--	endoplasmic reticulum metallopeptidase 1 [Asparagus officinalis]	--	A0A8B9A803_PHODC SubName: Full=endoplasmic reticulum metallopeptidase 1 isoform X1 {ECO:0000313|RefSeq:XP_038982796.1};	Aminopeptidases of the M20 family	--	Peptidase family M28	--	--	--
Cluster-100287.3	3147	--	--	endoplasmic reticulum metallopeptidase 1 [Asparagus officinalis]	--	A0A8B9A803_PHODC SubName: Full=endoplasmic reticulum metallopeptidase 1 isoform X1 {ECO:0000313|RefSeq:XP_038982796.1};	Aminopeptidases of the M20 family	--	Peptidase family M28	--	--	--
Cluster-100287.4	3115	--	--	endoplasmic reticulum metallopeptidase 1 [Asparagus officinalis]	--	A0A8B9A803_PHODC SubName: Full=endoplasmic reticulum metallopeptidase 1 isoform X1 {ECO:0000313|RefSeq:XP_038982796.1};	Aminopeptidases of the M20 family	--	Peptidase family M28	--	--	--
Cluster-100288.0	298	--	--	--	--	--	--	--	--	--	--	--
Cluster-100289.0	878	K04424 sterile alpha motif and leucine zipper containing kinase AZK [EC:2.7.11.25] | (RefSeq) serine/threonine-protein kinase EDR1-like (A)	--	hypothetical protein GIB67_012108 [Kingdonia uniflora]	EDR1_ARATH RecName: Full=Serine/threonine-protein kinase EDR1; EC=2.7.11.1; AltName: Full=MAPKK kinase EDR1; AltName: Full=Protein ENHANCED DISEASE RESISTANCE 1; Short=AtEDR1; AltName: Full=Serine/threonine/tyrosine-protein kinase 10;	A0A453ITR0_AEGTS RecName: Full=Protein kinase domain-containing protein {ECO:0000259|PROSITE:PS50011};	Tyrosine kinase specific for activated (GTP-bound) p21cdc42Hs	GO:0005737,cytoplasm; GO:0005829,cytosol; GO:0005769,early endosome; GO:0005783,endoplasmic reticulum; GO:0005768,endosome; GO:0005634,nucleus; GO:0005886,plasma membrane; GO:0005802,trans-Golgi network; GO:0012510,trans-Golgi network transport vesicle membrane; GO:0005524,ATP binding; GO:0016301,kinase activity; GO:0004709,MAP kinase kinase kinase activity; GO:0004672,protein kinase activity; GO…	--	--	--	--
Cluster-10029.0	268	--	--	--	--	--	--	--	--	--	--	--
Cluster-100290.0	1541	--	--	hypothetical protein [Tanacetum cinerariifolium]	--	A0A699GEN8_TANCI SubName: Full=Uncharacterized protein {ECO:0000313|EMBL:GEU28292.1};	--	--	Protein of unknown function (DUF1173)	--	--	--
Cluster-100291.0	2197	K07374 tubulin alpha | (RefSeq) tubulin alpha-2 chain-like (A)	ko04145: Phagosome	alpha-tubulin, partial [Triticum turgidum subsp. durum]	TBA1_HORVU RecName: Full=Tubulin alpha-1 chain;	Q334H1_TRITD SubName: Full=Alpha-tubulin {ECO:0000313|EMBL:CAI96845.1}; Flags: Fragment;	Alpha tubulin	GO:0005737,cytoplasm; GO:0005874,microtubule; GO:0005525,GTP binding; GO:0005200,structural constituent of cytoskeleton; GO:0007017,microtubule-based process; GO:0000166,nucleotide binding; GO:0001882,nucleoside binding; GO:0001883,purine nucleoside binding; GO:0003674,molecular_function; GO:0005488,binding; GO:0017076,purine nucleotide binding; GO:0019001,guanyl nucleotide binding; GO:0032549,ri…	--	--	--	--
Cluster-100291.1	447	K07374 tubulin alpha | (RefSeq) tubulin alpha chain-like (A)	ko04145: Phagosome	alpha-tubulin, partial [Triticum turgidum subsp. durum]	TBA1_HORVU RecName: Full=Tubulin alpha-1 chain;	Q334H1_TRITD SubName: Full=Alpha-tubulin {ECO:0000313|EMBL:CAI96845.1}; Flags: Fragment;	Alpha tubulin	GO:0005737,cytoplasm; GO:0005874,microtubule; GO:0005525,GTP binding; GO:0005200,structural constituent of cytoskeleton; GO:0007017,microtubule-based process; GO:0000166,nucleotide binding; GO:0001882,nucleoside binding; GO:0001883,purine nucleoside binding; GO:0003674,molecular_function; GO:0005488,binding; GO:0017076,purine nucleotide binding; GO:0019001,guanyl nucleotide binding; GO:0032549,ri…	--	--	--	--
Cluster-100291.2	542	--	--	--	--	--	--	--	--	--	--	--
Cluster-100292.0	253	--	--	--	--	--	--	--	--	--	--	--
Cluster-100292.1	757	--	--	uncharacterized protein LOC109828915 [Asparagus officinalis]	--	A0A5P1FWE0_ASPOF RecName: Full=Glycos_transf_1 domain-containing protein {ECO:0000259|Pfam:PF00534};	Glycosyltransferase	--	Glycosyl-transferase family 4	--	--	--
Cluster-100292.2	1194	--	--	uncharacterized protein LOC109828915 [Asparagus officinalis]	--	A0A5P1FWE0_ASPOF RecName: Full=Glycos_transf_1 domain-containing protein {ECO:0000259|Pfam:PF00534};	Glycosyltransferase	--	Glycosyl-transferase family 4	--	--	--
Cluster-100292.3	1822	K03843 alpha-1,3/alpha-1,6-mannosyltransferase [EC:2.4.1.132 2.4.1.257] | (RefSeq) Glycosyl transferase, family 1 (A)	ko00510: N-Glycan biosynthesis; ko00513: Various types of N-glycan biosynthesis; ko01100: Metabolic pathways	uncharacterized protein LOC109828915 [Asparagus officinalis]	--	A0A5P1FWE0_ASPOF RecName: Full=Glycos_transf_1 domain-containing protein {ECO:0000259|Pfam:PF00534};	Glycosyltransferase	--	Glycosyl-transferase family 4	--	--	--
Cluster-100292.4	757	--	--	uncharacterized protein LOC109828915 [Asparagus officinalis]	--	A0A5P1FWE0_ASPOF RecName: Full=Glycos_transf_1 domain-containing protein {ECO:0000259|Pfam:PF00534};	Glycosyltransferase	--	Glycosyl-transferase family 4	--	--	--
Cluster-100292.5	2162	K03843 alpha-1,3/alpha-1,6-mannosyltransferase [EC:2.4.1.132 2.4.1.257] | (RefSeq) Glycosyl transferase, family 1 (A)	ko00510: N-Glycan biosynthesis; ko00513: Various types of N-glycan biosynthesis; ko01100: Metabolic pathways	uncharacterized protein LOC109828915 [Asparagus officinalis]	--	A0A5P1FWE0_ASPOF RecName: Full=Glycos_transf_1 domain-containing protein {ECO:0000259|Pfam:PF00534};	Glycosyltransferase	--	Glycosyl-transferase family 4	--	--	--
Cluster-100292.6	2142	K03843 alpha-1,3/alpha-1,6-mannosyltransferase [EC:2.4.1.132 2.4.1.257] | (RefSeq) Glycosyl transferase, family 1 (A)	ko00510: N-Glycan biosynthesis; ko00513: Various types of N-glycan biosynthesis; ko01100: Metabolic pathways	uncharacterized protein LOC109828915 [Asparagus officinalis]	--	A0A5P1FWE0_ASPOF RecName: Full=Glycos_transf_1 domain-containing protein {ECO:0000259|Pfam:PF00534};	Glycosyltransferase	--	Glycosyl-transferase family 4	--	--	--
Cluster-100293.0	1116	--	--	--	--	--	--	--	--	--	--	--
Cluster-100294.0	764	K16547 protein NEDD1 | (RefSeq) protein NEDD1 (A)	--	protein NEDD1 [Cocos nucifera]	NEDD1_ARATH RecName: Full=Protein NEDD1 {ECO:0000303|PubMed:19383896}; AltName: Full=Neural precursor cell expressed developmentally down-regulated protein 1 homolog {ECO:0000303|PubMed:19383896}; AltName: Full=Protein GCP-WD {ECO:0000303|PubMed:25438942};	A0A8K0IS13_COCNU SubName: Full=Protein NEDD1 {ECO:0000313|EMBL:KAG1365812.1};	Nuclear protein COP1	GO:0000776,kinetochore; GO:0005828,kinetochore microtubule; GO:0005635,nuclear envelope; GO:0009524,phragmoplast; GO:0140496,gamma-tubulin complex binding; GO:0000919,cell plate assembly; GO:0009553,embryo sac development; GO:0009555,pollen development; GO:0032467,positive regulation of cytokinesis; GO:0010968,regulation of microtubule nucleation; GO:0060236,regulation of mitotic spindle organiza…	--	--	--	--
Cluster-100294.1	820	K16547 protein NEDD1 | (RefSeq) protein NEDD1 (A)	--	protein NEDD1 [Cocos nucifera]	NEDD1_ARATH RecName: Full=Protein NEDD1 {ECO:0000303|PubMed:19383896}; AltName: Full=Neural precursor cell expressed developmentally down-regulated protein 1 homolog {ECO:0000303|PubMed:19383896}; AltName: Full=Protein GCP-WD {ECO:0000303|PubMed:25438942};	A0A8K0IS13_COCNU SubName: Full=Protein NEDD1 {ECO:0000313|EMBL:KAG1365812.1};	Nuclear protein COP1	GO:0000776,kinetochore; GO:0005828,kinetochore microtubule; GO:0005635,nuclear envelope; GO:0009524,phragmoplast; GO:0140496,gamma-tubulin complex binding; GO:0000919,cell plate assembly; GO:0009553,embryo sac development; GO:0009555,pollen development; GO:0032467,positive regulation of cytokinesis; GO:0010968,regulation of microtubule nucleation; GO:0060236,regulation of mitotic spindle organiza…	--	--	--	--
Cluster-100295.0	342	--	--	--	--	--	--	--	--	--	--	--
Cluster-100296.0	1829	K11593 eukaryotic translation initiation factor 2C | (RefSeq) protein argonaute 1A-like (A)	--	hypothetical protein F2P56_003155 [Juglans regia]	POLR1_ARATH RecName: Full=Retrovirus-related Pol polyprotein from transposon RE1; AltName: Full=Retro element 1 {ECO:0000303|PubMed:10689195}; Short=AtRE1 {ECO:0000303|PubMed:10689195}; Includes: RecName: Full=Protease RE1; EC=3.4.23.-; Includes: RecName: Full=Reverse transcriptase RE1; EC=2.7.7.49; Includes: RecName: Full=Endonuclease RE1;	A0A833Y2L6_JUGRE SubName: Full=Uncharacterized protein {ECO:0000313|EMBL:KAF5482597.1};	FOG: Transposon-encoded proteins with TYA, reverse transcriptase, integrase domains in various combinations	GO:0004190,aspartic-type endopeptidase activity; GO:0004519,endonuclease activity; GO:0046872,metal ion binding; GO:0003676,nucleic acid binding; GO:0003964,RNA-directed DNA polymerase activity; GO:0015074,DNA integration; GO:0006310,DNA recombination; GO:0006508,proteolysis; GO:0003674,molecular_function; GO:0003824,catalytic activity; GO:0004175,endopeptidase activity; GO:0008233,peptidase acti…	--	--	--	--
Cluster-100297.0	464	--	--	--	--	--	--	--	--	--	--	--
Cluster-100298.0	389	--	--	hypothetical protein FNV43_RR25109 [Rhamnella rubrinervis]	DVL8_ARATH RecName: Full=Small polypeptide DEVIL 8 {ECO:0000303|PubMed:14871303}; AltName: Full=Small polypeptide ROTUNDIFOLIA LIKE 7 {ECO:0000303|PubMed:15125775}; Short=Small polypeptide ROT-FOUR-LIKE 7 {ECO:0000303|PubMed:15125775};	A0A8K0GQV4_9ROSA SubName: Full=Uncharacterized protein {ECO:0000313|EMBL:KAF3434006.1};	--	GO:0016021,integral component of membrane; GO:0005886,plasma membrane; GO:0008285,negative regulation of cell population proliferation; GO:0048367,shoot system development; GO:0008150,biological_process; GO:0008283,cell population proliferation; GO:0009987,cellular process; GO:0042127,regulation of cell population proliferation; GO:0048519,negative regulation of biological process; GO:0048523,neg…	--	--	--	--
Cluster-100299.0	494	--	--	--	--	--	--	--	--	--	--	--
Cluster-1003.0	394	--	--	--	--	--	--	--	--	--	--	--
Cluster-10030.0	559	--	--	--	--	--	--	--	--	--	--	--
Cluster-100300.0	482	--	--	--	--	--	--	--	--	--	--	--
Cluster-100301.0	618	--	--	--	--	--	--	--	--	--	--	--
Cluster-100302.0	1026	--	--	--	--	--	--	--	--	--	--	--
Cluster-100303.0	927	K07375 tubulin beta | (RefSeq) tubulin beta-3 chain-like (A)	ko04145: Phagosome	tubulin beta chain, partial [Trifolium pratense]	TBB1_ARATH RecName: Full=Tubulin beta-1 chain; AltName: Full=Beta-1-tubulin;	A0A2K3JQM5_TRIPR SubName: Full=Tubulin beta chain {ECO:0000313|EMBL:PNX56333.1}; Flags: Fragment;	Beta tubulin	GO:0005737,cytoplasm; GO:0005874,microtubule; GO:0005773,vacuole; GO:0005525,GTP binding; GO:0003729,mRNA binding; GO:0005200,structural constituent of cytoskeleton; GO:0000226,microtubule cytoskeleton organization; GO:0007017,microtubule-based process; GO:0000278,mitotic cell cycle; GO:0009416,response to light stimulus; GO:0009826,unidimensional cell growth; GO:0000166,nucleotide binding; GO:00…	--	--	--	--
Cluster-100303.1	1048	--	--	--	--	--	--	--	--	--	--	--
Cluster-100304.0	564	--	--	BAG family molecular chaperone regulator 7 [Asparagus officinalis]	--	A0A1D1ZE84_9ARAE SubName: Full=BAG family molecular chaperone regulator 7 {ECO:0000313|EMBL:JAT65167.1}; Flags: Fragment;	--	--	--	--	--	--
Cluster-100304.1	762	--	--	BAG family molecular chaperone regulator 7 [Asparagus officinalis]	--	A0A1D1ZE84_9ARAE SubName: Full=BAG family molecular chaperone regulator 7 {ECO:0000313|EMBL:JAT65167.1}; Flags: Fragment;	--	--	--	--	--	--
Cluster-100304.2	767	--	--	BAG family molecular chaperone regulator 7 [Asparagus officinalis]	--	A0A2H9ZS84_9ASPA SubName: Full=BAG family molecular chaperone regulator 7 {ECO:0000313|EMBL:PKA46153.1};	--	--	--	--	--	--
Cluster-100304.3	799	--	--	BAG family molecular chaperone regulator 7 [Asparagus officinalis]	--	A0A2H9ZS84_9ASPA SubName: Full=BAG family molecular chaperone regulator 7 {ECO:0000313|EMBL:PKA46153.1};	--	--	--	--	--	--
Cluster-100304.4	247	--	--	BAG family molecular chaperone regulator 7 [Asparagus officinalis]	--	--	--	--	--	--	--	--
Cluster-100304.5	722	--	--	BAG family molecular chaperone regulator 7 [Asparagus officinalis]	--	A0A2H9ZS84_9ASPA SubName: Full=BAG family molecular chaperone regulator 7 {ECO:0000313|EMBL:PKA46153.1};	--	--	--	--	--	--
Cluster-100305.0	926	--	--	--	--	--	--	--	--	--	--	--
Cluster-100306.0	759	K19042 E3 ubiquitin-protein ligase BOI and related proteins [EC:2.3.2.27] | (RefSeq) BOI-related E3 ubiquitin-protein ligase 1-like (A)	--	BOI-related E3 ubiquitin-protein ligase 1-like [Asparagus officinalis]	BOI_ARATH RecName: Full=E3 ubiquitin-protein ligase BOI; EC=2.3.2.27 {ECO:0000269|PubMed:20921156}; AltName: Full=Inhibitor of apoptosis (IAP)-like protein; Short=AtILP; AltName: Full=Protein BOTRYTIS SUSCEPTIBLE 1 INTERACTOR; Short=AtBOI; AltName: Full=RING-type E3 ubiquitin transferase BOI {ECO:0000305};	A0A1D1YMD1_9ARAE SubName: Full=Baculoviral IAP repeat-containing protein 4 {ECO:0000313|EMBL:JAT55801.1};	Predicted E3 ubiquitin ligase	GO:0005634,nucleus; GO:0046872,metal ion binding; GO:0004842,ubiquitin-protein transferase activity; GO:0042742,defense response to bacterium; GO:0050832,defense response to fungus; GO:2000117,negative regulation of cysteine-type endopeptidase activity; GO:0043069,negative regulation of programmed cell death; GO:0043161,proteasome-mediated ubiquitin-dependent protein catabolic process; GO:0043067…	Zinc finger, C3HC4 type (RING finger)	--	--	--
Cluster-100307.0	682	--	--	--	--	--	--	--	--	--	--	--
Cluster-100308.0	701	--	--	--	--	--	--	--	--	--	--	--
Cluster-100309.0	335	K03164 DNA topoisomerase II [EC:5.6.2.2] | (RefSeq) DNA topoisomerase 2-like (A)	--	--	TOP2_PEA RecName: Full=DNA topoisomerase 2; EC=5.6.2.2 {ECO:0000255|PROSITE-ProRule:PRU00995}; AltName: Full=DNA topoisomerase II; AltName: Full=PsTopII;	A0A3R7HIJ5_9STRA RecName: Full=DNA topoisomerase 2 {ECO:0000256|RuleBase:RU362094}; EC=5.6.2.2 {ECO:0000256|RuleBase:RU362094};	DNA topoisomerase type II	GO:0005524,ATP binding; GO:0003677,DNA binding; GO:0003918,DNA topoisomerase type II (double strand cut, ATP-hydrolyzing) activity; GO:0046872,metal ion binding; GO:0006265,DNA topological change; GO:0000166,nucleotide binding; GO:0003674,molecular_function; GO:0005488,binding; GO:0017076,purine nucleotide binding; GO:0030554,adenyl nucleotide binding; GO:0032553,ribonucleotide binding; GO:003255…	--	--	--	--
Cluster-10031.0	380	--	--	--	--	--	--	--	--	--	--	--
Cluster-100310.0	554	--	--	--	--	--	--	--	--	--	--	--
Cluster-100311.0	1162	--	--	--	--	--	--	--	--	--	--	--
Cluster-100312.0	4396	K01469 5-oxoprolinase (ATP-hydrolysing) [EC:3.5.2.9] | (RefSeq) 5-oxoprolinase (A)	ko00480: Glutathione metabolism; ko01100: Metabolic pathways	5-oxoprolinase [Asparagus officinalis]	OPLA_ARATH RecName: Full=5-oxoprolinase 1 {ECO:0000303|PubMed:18768907}; EC=3.5.2.9 {ECO:0000269|PubMed:18768907}; AltName: Full=5-oxo-L-prolinase {ECO:0000303|PubMed:18768907}; Short=5-OPase {ECO:0000303|PubMed:18768907}; AltName: Full=Protein OXOPROLINASE 1 {ECO:0000303|PubMed:18768907}; AltName: Full=Pyroglutamase {ECO:0000303|PubMed:18768907};	A0A8B7BNZ6_PHODC SubName: Full=5-oxoprolinase {ECO:0000313|RefSeq:XP_008782413.1};	Oxoprolinase	GO:0005737,cytoplasm; GO:0005829,cytosol; GO:0009506,plasmodesma; GO:0009536,plastid; GO:0017168,5-oxoprolinase (ATP-hydrolyzing) activity; GO:0005524,ATP binding; GO:0006751,glutathione catabolic process; GO:0006749,glutathione metabolic process; GO:0003674,molecular_function; GO:0003824,catalytic activity; GO:0016787,hydrolase activity; GO:0016810,hydrolase activity, acting on carbon-nitrogen (…	Hydantoinase B/oxoprolinase	--	--	--
Cluster-100312.1	4396	K01469 5-oxoprolinase (ATP-hydrolysing) [EC:3.5.2.9] | (RefSeq) 5-oxoprolinase (A)	ko00480: Glutathione metabolism; ko01100: Metabolic pathways	5-oxoprolinase [Asparagus officinalis]	OPLA_ARATH RecName: Full=5-oxoprolinase 1 {ECO:0000303|PubMed:18768907}; EC=3.5.2.9 {ECO:0000269|PubMed:18768907}; AltName: Full=5-oxo-L-prolinase {ECO:0000303|PubMed:18768907}; Short=5-OPase {ECO:0000303|PubMed:18768907}; AltName: Full=Protein OXOPROLINASE 1 {ECO:0000303|PubMed:18768907}; AltName: Full=Pyroglutamase {ECO:0000303|PubMed:18768907};	A0A8B7BNZ6_PHODC SubName: Full=5-oxoprolinase {ECO:0000313|RefSeq:XP_008782413.1};	Oxoprolinase	GO:0005737,cytoplasm; GO:0005829,cytosol; GO:0009506,plasmodesma; GO:0009536,plastid; GO:0017168,5-oxoprolinase (ATP-hydrolyzing) activity; GO:0005524,ATP binding; GO:0006751,glutathione catabolic process; GO:0006749,glutathione metabolic process; GO:0003674,molecular_function; GO:0003824,catalytic activity; GO:0016787,hydrolase activity; GO:0016810,hydrolase activity, acting on carbon-nitrogen (…	Hydantoinase B/oxoprolinase	--	--	--
Cluster-100312.2	4396	K01469 5-oxoprolinase (ATP-hydrolysing) [EC:3.5.2.9] | (RefSeq) 5-oxoprolinase (A)	ko00480: Glutathione metabolism; ko01100: Metabolic pathways	5-oxoprolinase [Asparagus officinalis]	OPLA_ARATH RecName: Full=5-oxoprolinase 1 {ECO:0000303|PubMed:18768907}; EC=3.5.2.9 {ECO:0000269|PubMed:18768907}; AltName: Full=5-oxo-L-prolinase {ECO:0000303|PubMed:18768907}; Short=5-OPase {ECO:0000303|PubMed:18768907}; AltName: Full=Protein OXOPROLINASE 1 {ECO:0000303|PubMed:18768907}; AltName: Full=Pyroglutamase {ECO:0000303|PubMed:18768907};	A0A8B7BNZ6_PHODC SubName: Full=5-oxoprolinase {ECO:0000313|RefSeq:XP_008782413.1};	Oxoprolinase	GO:0005737,cytoplasm; GO:0005829,cytosol; GO:0009506,plasmodesma; GO:0009536,plastid; GO:0017168,5-oxoprolinase (ATP-hydrolyzing) activity; GO:0005524,ATP binding; GO:0006751,glutathione catabolic process; GO:0006749,glutathione metabolic process; GO:0003674,molecular_function; GO:0003824,catalytic activity; GO:0016787,hydrolase activity; GO:0016810,hydrolase activity, acting on carbon-nitrogen (…	Hydantoinase B/oxoprolinase	--	--	--
Cluster-100312.3	4396	K01469 5-oxoprolinase (ATP-hydrolysing) [EC:3.5.2.9] | (RefSeq) 5-oxoprolinase (A)	ko00480: Glutathione metabolism; ko01100: Metabolic pathways	5-oxoprolinase [Asparagus officinalis]	OPLA_ARATH RecName: Full=5-oxoprolinase 1 {ECO:0000303|PubMed:18768907}; EC=3.5.2.9 {ECO:0000269|PubMed:18768907}; AltName: Full=5-oxo-L-prolinase {ECO:0000303|PubMed:18768907}; Short=5-OPase {ECO:0000303|PubMed:18768907}; AltName: Full=Protein OXOPROLINASE 1 {ECO:0000303|PubMed:18768907}; AltName: Full=Pyroglutamase {ECO:0000303|PubMed:18768907};	A0A8B7BNZ6_PHODC SubName: Full=5-oxoprolinase {ECO:0000313|RefSeq:XP_008782413.1};	Oxoprolinase	GO:0005737,cytoplasm; GO:0005829,cytosol; GO:0009506,plasmodesma; GO:0009536,plastid; GO:0017168,5-oxoprolinase (ATP-hydrolyzing) activity; GO:0005524,ATP binding; GO:0006751,glutathione catabolic process; GO:0006749,glutathione metabolic process; GO:0003674,molecular_function; GO:0003824,catalytic activity; GO:0016787,hydrolase activity; GO:0016810,hydrolase activity, acting on carbon-nitrogen (…	Hydantoinase B/oxoprolinase	--	--	--
Cluster-100312.4	383	--	--	--	--	--	--	--	--	--	--	--
Cluster-100313.0	631	--	--	uncharacterized protein LOC109709606 [Ananas comosus]	--	A0A6P5EUQ1_ANACO SubName: Full=uncharacterized protein LOC109709606 {ECO:0000313|RefSeq:XP_020087501.1};	--	--	--	--	--	--
Cluster-100314.0	861	K00753 glycoprotein 3-alpha-L-fucosyltransferase [EC:2.4.1.214] | (RefSeq) LOW QUALITY PROTEIN: glycoprotein 3-alpha-L-fucosyltransferase A-like (A)	ko00513: Various types of N-glycan biosynthesis; ko01100: Metabolic pathways	LOW QUALITY PROTEIN: glycoprotein 3-alpha-L-fucosyltransferase A-like [Asparagus officinalis]	--	A0A5P1F2Z4_ASPOF SubName: Full=Uncharacterized protein {ECO:0000313|EMBL:ONK71169.1};	--	--	--	--	--	--
[truncated: 297,426+ more rows]
