# Supplementary material for: An integrated targeted metabolome of phytohormones and transcriptomics analysis provides insight into the new generation of crops: Polygonatum kingianum var. grandifolium and Polygonatum kingianum
Source: Front Plant Sci. 2024 Sep 24;15:1464731. doi: 10.3389/fpls.2024.1464731 (PMC11458434; doi:10.3389/fpls.2024.1464731)
Supplement: Supplementary file 8 [file Table6.xlsx]

## Sheet: D-bud_vs_X-bud
Supplementary Table S6 KEGG pathway analysis of DEGs in different groups (1)
KEGG_map	Description	GeneRatio	BgRatio	P-value	Adjusted P-value	All_gene	Count_all	Up_gene	Count_up	Down_gene	Count_down	hyperlink
ko03010	Ribosome	1448/25497 5.67909950190218%	3050/60969 5.00254227558267%	5.06236e-11	7.39105e-09	Cluster-128216.0;Cluster-128216.1;Cluster-26278.2;Cluster-26278.4;Cluster-26278.8;Cluster-64666.2;Cluster-66799.0;Cluster-75124.0;Cluster-75124.1;Cluster-114321.1;Cluster-114321.2;Cluster-114321.3;Cluster-114321.5;Cluster-114321.7;Cluster-114321.8;Cluster-119886.0;Cluster-119886.1;Cluster-119886.2;Cluster-119886.3;Cluster-119886.4;Cluster-119886.5;Cluster-119886.6;Cluster-114718.2;Cluster-114810.…	1448	Cluster-128216.0;Cluster-128216.1;Cluster-26278.2;Cluster-26278.8;Cluster-64666.2;Cluster-66799.0;Cluster-75124.1;Cluster-114321.3;Cluster-114321.5;Cluster-114321.7;Cluster-114321.8;Cluster-119886.0;Cluster-119886.1;Cluster-119886.2;Cluster-119886.5;Cluster-114810.11;Cluster-114810.3;Cluster-114810.7;Cluster-24646.0;Cluster-109283.1;Cluster-111416.0;Cluster-7727.14;Cluster-7727.4;Cluster-7727.5;C…	758	Cluster-26278.4;Cluster-75124.0;Cluster-114321.1;Cluster-114321.2;Cluster-119886.3;Cluster-119886.4;Cluster-119886.6;Cluster-114718.2;Cluster-114810.2;Cluster-114810.5;Cluster-114810.6;Cluster-114810.8;Cluster-109283.0;Cluster-111416.1;Cluster-111416.4;Cluster-134755.0;Cluster-134755.12;Cluster-134755.4;Cluster-134755.7;Cluster-134755.9;Cluster-126279.2;Cluster-126279.5;Cluster-126279.6;Cluster-1…	690	https:\\www.genome.jp\dbget-bin\www_bget?map03010
ko03040	Spliceosome	1381/25497 5.41632348903793%	2960/60969 4.8549262740081%	2.8773e-08	4.20086e-06	Cluster-100532.1;Cluster-100532.2;Cluster-100532.3;Cluster-100532.6;Cluster-100590.0;Cluster-102008.2;Cluster-102361.0;Cluster-102361.1;Cluster-103157.0;Cluster-103157.1;Cluster-106407.2;Cluster-106407.5;Cluster-106929.0;Cluster-109046.1;Cluster-111583.1;Cluster-120162.385;Cluster-120162.389;Cluster-120162.390;Cluster-120162.391;Cluster-120162.392;Cluster-120162.393;Cluster-120306.0;Cluster-12032…	1381	Cluster-100532.2;Cluster-100532.3;Cluster-100532.6;Cluster-102361.0;Cluster-103157.1;Cluster-106407.5;Cluster-109046.1;Cluster-111583.1;Cluster-120162.385;Cluster-120162.389;Cluster-120162.393;Cluster-120324.0;Cluster-122938.0;Cluster-122938.4;Cluster-123989.4;Cluster-123989.6;Cluster-125526.0;Cluster-125526.4;Cluster-125645.0;Cluster-125645.1;Cluster-125645.10;Cluster-125645.12;Cluster-125645.2;…	653	Cluster-100532.1;Cluster-100590.0;Cluster-102008.2;Cluster-102361.1;Cluster-103157.0;Cluster-106407.2;Cluster-106929.0;Cluster-120162.390;Cluster-120162.391;Cluster-120162.392;Cluster-120306.0;Cluster-122938.2;Cluster-122938.5;Cluster-125526.3;Cluster-125526.5;Cluster-125645.11;Cluster-125645.14;Cluster-125645.15;Cluster-125645.20;Cluster-125645.24;Cluster-125645.27;Cluster-125645.3;Cluster-12564…	728	https:\\www.genome.jp\dbget-bin\www_bget?map03040
ko04141	Protein processing in endoplasmic reticulum	1305/25497 5.11824920578892%	2824/60969 4.63186209385097%	7.67569e-07	0.000112065	Cluster-107304.0;Cluster-107304.2;Cluster-28518.1;Cluster-28518.2;Cluster-122110.0;Cluster-122110.1;Cluster-122110.2;Cluster-122110.3;Cluster-122110.4;Cluster-129701.1;Cluster-129701.14;Cluster-129701.2;Cluster-19855.13;Cluster-19855.14;Cluster-19855.16;Cluster-19855.18;Cluster-19855.19;Cluster-19855.2;Cluster-19855.21;Cluster-24517.7;Cluster-24517.9;Cluster-31198.4;Cluster-31198.5;Cluster-58776.…	1305	Cluster-107304.2;Cluster-28518.1;Cluster-28518.2;Cluster-122110.0;Cluster-122110.1;Cluster-122110.4;Cluster-19855.14;Cluster-19855.16;Cluster-19855.19;Cluster-19855.2;Cluster-24517.7;Cluster-24517.9;Cluster-31198.4;Cluster-31198.5;Cluster-81900.1;Cluster-81900.2;Cluster-105668.3;Cluster-122204.2;Cluster-36427.1;Cluster-36427.2;Cluster-36427.25;Cluster-36427.4;Cluster-36427.7;Cluster-47887.40;Clus…	682	Cluster-107304.0;Cluster-122110.2;Cluster-122110.3;Cluster-129701.1;Cluster-129701.14;Cluster-129701.2;Cluster-19855.13;Cluster-19855.18;Cluster-19855.21;Cluster-58776.0;Cluster-81005.22;Cluster-91610.2;Cluster-105668.2;Cluster-105668.4;Cluster-105668.5;Cluster-105668.6;Cluster-105668.7;Cluster-122204.3;Cluster-122204.4;Cluster-122204.6;Cluster-36427.26;Cluster-36427.5;Cluster-36427.6;Cluster-120…	623	https:\\www.genome.jp\dbget-bin\www_bget?map04141
ko03022	Basal transcription factors	200/25497 0.784406008550026%	399/60969 0.65443094031393%	0.000477823	0.0697622	Cluster-129567.1;Cluster-129567.2;Cluster-129567.4;Cluster-129567.5;Cluster-129567.6;Cluster-131541.0;Cluster-131541.1;Cluster-131541.2;Cluster-131541.3;Cluster-131541.6;Cluster-131541.8;Cluster-131541.9;Cluster-134124.0;Cluster-134124.1;Cluster-134124.3;Cluster-134124.4;Cluster-134124.6;Cluster-134124.7;Cluster-48144.7;Cluster-48144.8;Cluster-110937.2;Cluster-110937.3;Cluster-114403.0;Cluster-11…	200	Cluster-129567.1;Cluster-129567.2;Cluster-129567.4;Cluster-131541.6;Cluster-131541.8;Cluster-134124.4;Cluster-134124.6;Cluster-134124.7;Cluster-48144.7;Cluster-48144.8;Cluster-110937.3;Cluster-114403.4;Cluster-126824.2;Cluster-129264.1;Cluster-130975.3;Cluster-130975.4;Cluster-50496.6;Cluster-64579.4;Cluster-68384.1;Cluster-68384.2;Cluster-68384.4;Cluster-68384.7;Cluster-98485.0;Cluster-110450.1;…	106	Cluster-129567.5;Cluster-129567.6;Cluster-131541.0;Cluster-131541.1;Cluster-131541.2;Cluster-131541.3;Cluster-131541.9;Cluster-134124.0;Cluster-134124.1;Cluster-134124.3;Cluster-110937.2;Cluster-114403.0;Cluster-114403.2;Cluster-126824.1;Cluster-130975.1;Cluster-130975.2;Cluster-130975.7;Cluster-50496.12;Cluster-50496.4;Cluster-50496.8;Cluster-64579.7;Cluster-68384.5;Cluster-68384.6;Cluster-68384…	94	https:\\www.genome.jp\dbget-bin\www_bget?map03022
ko00563	Glycosylphosphatidylinositol (GPI)-anchor biosynthesis	175/25497 0.686355257481272%	348/60969 0.570781872755007%	0.000851162	0.12427	Cluster-101340.2;Cluster-101340.3;Cluster-101340.4;Cluster-101340.5;Cluster-101340.6;Cluster-11740.66;Cluster-11740.67;Cluster-11740.72;Cluster-109543.0;Cluster-130090.11;Cluster-36421.12;Cluster-36421.13;Cluster-36421.19;Cluster-36421.20;Cluster-36421.21;Cluster-36421.25;Cluster-36421.30;Cluster-36421.7;Cluster-118573.0;Cluster-118573.2;Cluster-118573.3;Cluster-118573.4;Cluster-132819.39;Cluster…	175	Cluster-101340.4;Cluster-101340.5;Cluster-101340.6;Cluster-11740.66;Cluster-11740.67;Cluster-11740.72;Cluster-130090.11;Cluster-36421.12;Cluster-36421.19;Cluster-36421.30;Cluster-118573.0;Cluster-118573.4;Cluster-132819.46;Cluster-132819.48;Cluster-132819.52;Cluster-105442.0;Cluster-105681.1;Cluster-119535.0;Cluster-122620.1;Cluster-128333.2;Cluster-128333.5;Cluster-130166.0;Cluster-130166.1;Clus…	96	Cluster-101340.2;Cluster-101340.3;Cluster-109543.0;Cluster-36421.13;Cluster-36421.20;Cluster-36421.21;Cluster-36421.25;Cluster-36421.7;Cluster-118573.2;Cluster-118573.3;Cluster-132819.39;Cluster-132819.44;Cluster-132819.45;Cluster-90247.1;Cluster-105681.4;Cluster-119535.1;Cluster-119535.2;Cluster-122620.0;Cluster-128333.10;Cluster-128333.4;Cluster-128333.6;Cluster-128333.8;Cluster-128333.9;Cluste…	79	https:\\www.genome.jp\dbget-bin\www_bget?map00563
ko04120	Ubiquitin mediated proteolysis	853/25497 3.34549162646586%	1887/60969 3.09501549968017%	0.00137053	0.200098	Cluster-116807.0;Cluster-116807.1;Cluster-116807.3;Cluster-19789.0;Cluster-26303.1;Cluster-26303.3;Cluster-26303.4;Cluster-39748.0;Cluster-47589.143;Cluster-47589.147;Cluster-47589.175;Cluster-47589.183;Cluster-47589.203;Cluster-47589.204;Cluster-47589.205;Cluster-47589.229;Cluster-47589.231;Cluster-47589.232;Cluster-47589.233;Cluster-47589.234;Cluster-47589.235;Cluster-47589.239;Cluster-47589.25…	853	Cluster-19789.0;Cluster-26303.1;Cluster-26303.3;Cluster-26303.4;Cluster-39748.0;Cluster-47589.147;Cluster-47589.183;Cluster-47589.205;Cluster-47589.229;Cluster-47589.231;Cluster-47589.234;Cluster-47589.239;Cluster-47589.261;Cluster-47589.74;Cluster-47589.76;Cluster-47589.84;Cluster-47589.95;Cluster-54243.836;Cluster-54243.840;Cluster-54243.841;Cluster-55160.0;Cluster-73750.0;Cluster-73750.4;Clust…	419	Cluster-116807.0;Cluster-116807.1;Cluster-116807.3;Cluster-47589.143;Cluster-47589.175;Cluster-47589.203;Cluster-47589.204;Cluster-47589.232;Cluster-47589.233;Cluster-47589.235;Cluster-47589.259;Cluster-47589.75;Cluster-47589.83;Cluster-62101.1;Cluster-6536.35;Cluster-6536.36;Cluster-74643.3;Cluster-81024.0;Cluster-84186.0;Cluster-47589.155;Cluster-47589.156;Cluster-47589.159;Cluster-47589.160;Cl…	434	https:\\www.genome.jp\dbget-bin\www_bget?map04120
ko03050	Proteasome	314/25497 1.23151743342354%	660/60969 1.08251734488019%	0.00153275	0.223782	Cluster-131825.0;Cluster-131825.1;Cluster-131825.2;Cluster-131825.3;Cluster-131825.4;Cluster-131825.5;Cluster-131825.6;Cluster-131825.7;Cluster-131825.9;Cluster-115374.1;Cluster-115374.2;Cluster-115374.3;Cluster-95700.1;Cluster-95700.2;Cluster-95700.4;Cluster-95700.5;Cluster-59610.0;Cluster-59610.1;Cluster-59610.4;Cluster-59610.5;Cluster-99549.0;Cluster-125632.0;Cluster-125632.1;Cluster-125632.2;…	314	Cluster-131825.1;Cluster-131825.2;Cluster-131825.5;Cluster-131825.6;Cluster-131825.7;Cluster-115374.2;Cluster-115374.3;Cluster-95700.2;Cluster-59610.0;Cluster-59610.1;Cluster-125632.2;Cluster-125632.3;Cluster-125632.7;Cluster-30248.0;Cluster-30248.1;Cluster-30248.4;Cluster-30248.6;Cluster-129577.1;Cluster-129577.2;Cluster-129577.3;Cluster-129577.4;Cluster-28096.19;Cluster-127749.1;Cluster-127749.…	159	Cluster-131825.0;Cluster-131825.3;Cluster-131825.4;Cluster-131825.9;Cluster-115374.1;Cluster-95700.1;Cluster-95700.4;Cluster-95700.5;Cluster-59610.4;Cluster-59610.5;Cluster-99549.0;Cluster-125632.0;Cluster-125632.1;Cluster-125632.5;Cluster-66054.2;Cluster-114934.0;Cluster-114934.1;Cluster-114934.2;Cluster-118364.0;Cluster-30248.2;Cluster-30248.5;Cluster-129577.0;Cluster-129577.5;Cluster-129577.6;…	155	https:\\www.genome.jp\dbget-bin\www_bget?map03050
ko00240	Pyrimidine metabolism	313/25497 1.22759540338079%	660/60969 1.08251734488019%	0.0019728	0.288029	Cluster-101892.0;Cluster-51991.1;Cluster-81090.1;Cluster-22897.11;Cluster-22897.12;Cluster-22897.14;Cluster-22897.3;Cluster-22897.4;Cluster-22897.8;Cluster-22897.9;Cluster-114668.1;Cluster-95719.0;Cluster-95719.6;Cluster-110523.0;Cluster-110523.1;Cluster-110523.2;Cluster-110523.3;Cluster-110523.4;Cluster-122239.0;Cluster-128601.1;Cluster-128601.3;Cluster-128601.6;Cluster-128601.7;Cluster-128601.9…	313	Cluster-22897.11;Cluster-22897.14;Cluster-22897.3;Cluster-22897.9;Cluster-95719.6;Cluster-110523.0;Cluster-110523.3;Cluster-110523.4;Cluster-122239.0;Cluster-128601.1;Cluster-128601.6;Cluster-128601.7;Cluster-131562.2;Cluster-131562.4;Cluster-131562.5;Cluster-38001.0;Cluster-38936.2;Cluster-9198.2;Cluster-9198.4;Cluster-110954.2;Cluster-120345.0;Cluster-120345.3;Cluster-129032.0;Cluster-129032.1;…	160	Cluster-101892.0;Cluster-51991.1;Cluster-81090.1;Cluster-22897.12;Cluster-22897.4;Cluster-22897.8;Cluster-114668.1;Cluster-95719.0;Cluster-110523.1;Cluster-110523.2;Cluster-128601.3;Cluster-128601.9;Cluster-131562.1;Cluster-38936.3;Cluster-38936.6;Cluster-9198.1;Cluster-110954.3;Cluster-110954.4;Cluster-120345.1;Cluster-120345.2;Cluster-120345.4;Cluster-120345.5;Cluster-129032.2;Cluster-129032.3;…	153	https:\\www.genome.jp\dbget-bin\www_bget?map00240
ko00196	Photosynthesis - antenna proteins	42/25497 0.164725261795505%	71/60969 0.116452623464384%	0.00239922	0.350287	Cluster-46959.3;Cluster-46959.4;Cluster-126243.0;Cluster-126243.1;Cluster-126243.2;Cluster-132810.1;Cluster-132810.3;Cluster-132810.4;Cluster-132810.5;Cluster-134221.0;Cluster-111079.0;Cluster-61112.0;Cluster-61112.1;Cluster-61112.10;Cluster-61112.12;Cluster-61112.13;Cluster-61112.18;Cluster-61112.2;Cluster-61112.3;Cluster-61112.7;Cluster-61112.8;Cluster-61112.9;Cluster-130484.0;Cluster-130484.1;…	42	Cluster-46959.3;Cluster-46959.4;Cluster-126243.0;Cluster-126243.1;Cluster-126243.2;Cluster-132810.1;Cluster-132810.4;Cluster-132810.5;Cluster-134221.0;Cluster-111079.0;Cluster-61112.0;Cluster-61112.1;Cluster-61112.10;Cluster-61112.12;Cluster-61112.13;Cluster-61112.18;Cluster-61112.2;Cluster-61112.3;Cluster-61112.7;Cluster-61112.8;Cluster-61112.9;Cluster-130484.0;Cluster-130484.1;Cluster-130484.3;…	38	Cluster-132810.3;Cluster-109541.0;Cluster-125311.1;Cluster-101090.2	4	https:\\www.genome.jp\dbget-bin\www_bget?map00196
ko04712	Circadian rhythm - plant	291/25497 1.14131074244029%	616/60969 1.01034952188817%	0.00358417	0.523289	Cluster-100412.0;Cluster-100412.1;Cluster-100412.10;Cluster-100412.2;Cluster-100412.3;Cluster-100412.4;Cluster-100412.5;Cluster-100412.6;Cluster-100412.8;Cluster-100412.9;Cluster-113575.0;Cluster-113575.2;Cluster-113575.3;Cluster-125627.0;Cluster-125627.2;Cluster-19948.0;Cluster-60317.4;Cluster-60317.5;Cluster-101006.0;Cluster-103129.0;Cluster-109447.0;Cluster-109447.1;Cluster-109447.2;Cluster-11…	291	Cluster-100412.0;Cluster-100412.6;Cluster-113575.2;Cluster-125627.2;Cluster-19948.0;Cluster-109447.2;Cluster-113311.0;Cluster-122746.1;Cluster-122746.2;Cluster-122746.4;Cluster-126914.5;Cluster-18799.7;Cluster-35586.14;Cluster-35586.18;Cluster-35586.19;Cluster-35586.21;Cluster-100117.2;Cluster-121297.2;Cluster-121297.3;Cluster-121297.4;Cluster-121297.7;Cluster-121297.8;Cluster-124825.0;Cluster-13…	128	Cluster-100412.1;Cluster-100412.10;Cluster-100412.2;Cluster-100412.3;Cluster-100412.4;Cluster-100412.5;Cluster-100412.8;Cluster-100412.9;Cluster-113575.0;Cluster-113575.3;Cluster-125627.0;Cluster-60317.4;Cluster-60317.5;Cluster-101006.0;Cluster-103129.0;Cluster-109447.0;Cluster-109447.1;Cluster-113311.1;Cluster-113311.2;Cluster-122746.0;Cluster-122746.6;Cluster-126914.3;Cluster-35586.16;Cluster-3…	163	https:\\www.genome.jp\dbget-bin\www_bget?map04712
ko03008	Ribosome biogenesis in eukaryotes	683/25497 2.67874651919834%	1511/60969 2.47830864865751%	0.00384778	0.561776	Cluster-16867.4;Cluster-16867.6;Cluster-16867.7;Cluster-16867.9;Cluster-22805.0;Cluster-48228.2;Cluster-48228.4;Cluster-48228.5;Cluster-48228.6;Cluster-79212.0;Cluster-79212.2;Cluster-79212.4;Cluster-101006.0;Cluster-103129.0;Cluster-109447.0;Cluster-109447.1;Cluster-109447.2;Cluster-113311.0;Cluster-113311.1;Cluster-113311.2;Cluster-122746.0;Cluster-122746.1;Cluster-122746.2;Cluster-122746.4;Clu…	683	Cluster-16867.7;Cluster-16867.9;Cluster-22805.0;Cluster-48228.2;Cluster-48228.4;Cluster-48228.6;Cluster-79212.0;Cluster-109447.2;Cluster-113311.0;Cluster-122746.1;Cluster-122746.2;Cluster-122746.4;Cluster-126914.5;Cluster-18799.7;Cluster-35586.14;Cluster-35586.18;Cluster-35586.19;Cluster-35586.21;Cluster-100117.2;Cluster-121297.2;Cluster-121297.3;Cluster-121297.4;Cluster-121297.7;Cluster-121297.8…	344	Cluster-16867.4;Cluster-16867.6;Cluster-48228.5;Cluster-79212.2;Cluster-79212.4;Cluster-101006.0;Cluster-103129.0;Cluster-109447.0;Cluster-109447.1;Cluster-113311.1;Cluster-113311.2;Cluster-122746.0;Cluster-122746.6;Cluster-126914.3;Cluster-35586.16;Cluster-35586.4;Cluster-35586.5;Cluster-35586.6;Cluster-35586.9;Cluster-121297.0;Cluster-121297.5;Cluster-121297.9;Cluster-132442.1;Cluster-132442.6;…	339	https:\\www.genome.jp\dbget-bin\www_bget?map03008
ko04075	Plant hormone signal transduction	1283/25497 5.03196454484841%	2910/60969 4.77291738424445%	0.00587266	0.857408	Cluster-116277.0;Cluster-116277.2;Cluster-116277.6;Cluster-116277.7;Cluster-116277.8;Cluster-118316.0;Cluster-118376.0;Cluster-118376.5;Cluster-129208.5;Cluster-129208.6;Cluster-129208.7;Cluster-134381.3;Cluster-134381.8;Cluster-134591.0;Cluster-35277.14;Cluster-35277.15;Cluster-35277.16;Cluster-35277.17;Cluster-35277.18;Cluster-35277.20;Cluster-35277.21;Cluster-35277.23;Cluster-35786.10;Cluster-…	1283	Cluster-116277.0;Cluster-116277.6;Cluster-116277.8;Cluster-129208.5;Cluster-129208.6;Cluster-134591.0;Cluster-35277.20;Cluster-35277.23;Cluster-35786.12;Cluster-35786.14;Cluster-35786.17;Cluster-35786.23;Cluster-35786.24;Cluster-35786.27;Cluster-35786.6;Cluster-64928.14;Cluster-64928.15;Cluster-83396.0;Cluster-83441.2;Cluster-90903.0;Cluster-91376.2;Cluster-91376.6;Cluster-99455.1;Cluster-110763.…	609	Cluster-116277.2;Cluster-116277.7;Cluster-118316.0;Cluster-118376.0;Cluster-118376.5;Cluster-129208.7;Cluster-134381.3;Cluster-134381.8;Cluster-35277.14;Cluster-35277.15;Cluster-35277.16;Cluster-35277.17;Cluster-35277.18;Cluster-35277.21;Cluster-35786.10;Cluster-35786.15;Cluster-35786.2;Cluster-35786.20;Cluster-35786.21;Cluster-35786.22;Cluster-35786.26;Cluster-35786.29;Cluster-35786.31;Cluster-3…	674	https:\\www.genome.jp\dbget-bin\www_bget?map04075
ko04122	Sulfur relay system	43/25497 0.168647291838255%	77/60969 0.126293690236022%	0.00904239	1	Cluster-65275.1;Cluster-65275.2;Cluster-65275.4;Cluster-65275.5;Cluster-65275.7;Cluster-65275.8;Cluster-101710.0;Cluster-101710.1;Cluster-58306.10;Cluster-58306.5;Cluster-58306.6;Cluster-58306.7;Cluster-58306.8;Cluster-129425.1;Cluster-129425.3;Cluster-129425.4;Cluster-129425.5;Cluster-129425.7;Cluster-105069.12;Cluster-105069.4;Cluster-105069.6;Cluster-105069.7;Cluster-105069.8;Cluster-105069.9;…	43	Cluster-65275.2;Cluster-65275.7;Cluster-101710.0;Cluster-58306.10;Cluster-58306.6;Cluster-58306.8;Cluster-129425.1;Cluster-129425.7;Cluster-105069.7;Cluster-105069.9;Cluster-23479.1;Cluster-106179.2;Cluster-106179.5;Cluster-18122.114;Cluster-18122.120;Cluster-18122.128;Cluster-18122.134;Cluster-91178.2;Cluster-91178.3;Cluster-91178.4;Cluster-108550.1;Cluster-108550.2	22	Cluster-65275.1;Cluster-65275.4;Cluster-65275.5;Cluster-65275.8;Cluster-101710.1;Cluster-58306.5;Cluster-58306.7;Cluster-129425.3;Cluster-129425.4;Cluster-129425.5;Cluster-105069.12;Cluster-105069.4;Cluster-105069.6;Cluster-105069.8;Cluster-106179.1;Cluster-106179.3;Cluster-18122.143;Cluster-131830.4;Cluster-90421.0;Cluster-91178.1;Cluster-108550.3	21	https:\\www.genome.jp\dbget-bin\www_bget?map04122
ko03420	Nucleotide excision repair	371/25497 1.4550731458603%	808/60969 1.32526365858059%	0.00982307	1	Cluster-129567.1;Cluster-129567.2;Cluster-129567.4;Cluster-129567.5;Cluster-129567.6;Cluster-131541.0;Cluster-131541.1;Cluster-131541.2;Cluster-131541.3;Cluster-131541.6;Cluster-131541.8;Cluster-131541.9;Cluster-120927.0;Cluster-120927.2;Cluster-120927.3;Cluster-120927.4;Cluster-120927.7;Cluster-12383.41;Cluster-12383.43;Cluster-134429.1;Cluster-26821.2;Cluster-26821.4;Cluster-34991.1010;Cluster-…	371	Cluster-129567.1;Cluster-129567.2;Cluster-129567.4;Cluster-131541.6;Cluster-131541.8;Cluster-120927.2;Cluster-120927.7;Cluster-12383.41;Cluster-12383.43;Cluster-26821.2;Cluster-34991.1010;Cluster-96596.0;Cluster-96596.1;Cluster-36980.10;Cluster-36980.11;Cluster-36980.4;Cluster-36980.5;Cluster-36980.7;Cluster-134106.1;Cluster-64847.2;Cluster-135541.0;Cluster-135541.6;Cluster-55982.10;Cluster-55982…	198	Cluster-129567.5;Cluster-129567.6;Cluster-131541.0;Cluster-131541.1;Cluster-131541.2;Cluster-131541.3;Cluster-131541.9;Cluster-120927.0;Cluster-120927.3;Cluster-120927.4;Cluster-134429.1;Cluster-26821.4;Cluster-34991.968;Cluster-73623.6;Cluster-95966.0;Cluster-134106.0;Cluster-64847.1;Cluster-123516.0;Cluster-135541.1;Cluster-135541.3;Cluster-135541.5;Cluster-55982.11;Cluster-55982.16;Cluster-559…	173	https:\\www.genome.jp\dbget-bin\www_bget?map03420
ko00592	alpha-Linolenic acid metabolism	252/25497 0.988351570773032%	541/60969 0.887336187242697%	0.0137818	1	Cluster-127575.0;Cluster-127575.1;Cluster-127575.2;Cluster-127575.5;Cluster-127575.7;Cluster-89347.1;Cluster-89347.2;Cluster-89347.3;Cluster-89347.4;Cluster-89347.5;Cluster-89347.7;Cluster-99719.0;Cluster-117284.0;Cluster-117284.1;Cluster-117284.4;Cluster-120522.0;Cluster-120522.1;Cluster-120522.4;Cluster-120522.5;Cluster-120522.7;Cluster-120522.8;Cluster-127187.1;Cluster-127187.4;Cluster-127187.…	252	Cluster-127575.2;Cluster-89347.3;Cluster-89347.5;Cluster-89347.7;Cluster-117284.0;Cluster-117284.4;Cluster-120522.0;Cluster-120522.5;Cluster-127187.4;Cluster-131596.3;Cluster-130225.1;Cluster-130225.2;Cluster-130225.5;Cluster-34769.0;Cluster-56289.0;Cluster-56289.4;Cluster-56289.7;Cluster-56289.9;Cluster-68263.2;Cluster-68263.4;Cluster-91919.0;Cluster-122874.2;Cluster-122874.3;Cluster-122874.7;Cl…	118	Cluster-127575.0;Cluster-127575.1;Cluster-127575.5;Cluster-127575.7;Cluster-89347.1;Cluster-89347.2;Cluster-89347.4;Cluster-99719.0;Cluster-117284.1;Cluster-120522.1;Cluster-120522.4;Cluster-120522.7;Cluster-120522.8;Cluster-127187.1;Cluster-127187.5;Cluster-131596.0;Cluster-131596.1;Cluster-131596.2;Cluster-25059.52;Cluster-29676.39;Cluster-104473.0;Cluster-104473.1;Cluster-104473.2;Cluster-1302…	134	https:\\www.genome.jp\dbget-bin\www_bget?map00592
ko00480	Glutathione metabolism	339/25497 1.32956818449229%	747/60969 1.22521281306894%	0.0259715	1	Cluster-123035.0;Cluster-123035.1;Cluster-123035.2;Cluster-123035.3;Cluster-125180.0;Cluster-125180.1;Cluster-125180.2;Cluster-125180.3;Cluster-33984.0;Cluster-47172.11;Cluster-48447.1;Cluster-60026.1;Cluster-60026.11;Cluster-60026.12;Cluster-60026.13;Cluster-60026.14;Cluster-60026.18;Cluster-60026.19;Cluster-60026.20;Cluster-60026.26;Cluster-60026.27;Cluster-60026.28;Cluster-60026.29;Cluster-600…	339	Cluster-123035.1;Cluster-123035.3;Cluster-125180.1;Cluster-33984.0;Cluster-47172.11;Cluster-48447.1;Cluster-60026.26;Cluster-60026.7;Cluster-70406.0;Cluster-125081.0;Cluster-125081.2;Cluster-127040.0;Cluster-127040.1;Cluster-24559.0;Cluster-48285.1;Cluster-48285.4;Cluster-48285.5;Cluster-48285.6;Cluster-48285.7;Cluster-80824.0;Cluster-109528.0;Cluster-109528.3;Cluster-123860.0;Cluster-30089.14;Cl…	163	Cluster-123035.0;Cluster-123035.2;Cluster-125180.0;Cluster-125180.2;Cluster-125180.3;Cluster-60026.1;Cluster-60026.11;Cluster-60026.12;Cluster-60026.13;Cluster-60026.14;Cluster-60026.18;Cluster-60026.19;Cluster-60026.20;Cluster-60026.27;Cluster-60026.28;Cluster-60026.29;Cluster-60026.6;Cluster-60026.8;Cluster-125081.1;Cluster-125081.3;Cluster-98249.1;Cluster-127040.2;Cluster-127040.6;Cluster-4828…	176	https:\\www.genome.jp\dbget-bin\www_bget?map00480
ko00410	beta-Alanine metabolism	242/25497 0.949131270345531%	526/60969 0.862733520313602%	0.0283347	1	Cluster-113514.0;Cluster-113514.1;Cluster-113514.2;Cluster-129794.0;Cluster-129794.11;Cluster-129794.12;Cluster-129794.13;Cluster-129794.14;Cluster-129794.16;Cluster-129794.17;Cluster-129794.19;Cluster-129794.2;Cluster-129794.3;Cluster-129794.4;Cluster-129794.8;Cluster-129794.9;Cluster-133601.0;Cluster-133601.1;Cluster-133601.2;Cluster-133601.4;Cluster-133601.6;Cluster-133601.7;Cluster-134234.0;C…	242	Cluster-113514.1;Cluster-129794.16;Cluster-129794.17;Cluster-129794.19;Cluster-129794.3;Cluster-133601.0;Cluster-133601.2;Cluster-133601.4;Cluster-134234.1;Cluster-134234.2;Cluster-134234.3;Cluster-134234.5;Cluster-134234.8;Cluster-134234.9;Cluster-19726.16;Cluster-31268.1;Cluster-49645.1;Cluster-49645.11;Cluster-49645.13;Cluster-49645.15;Cluster-49645.18;Cluster-49645.2;Cluster-49645.20;Cluster-…	112	Cluster-113514.0;Cluster-113514.2;Cluster-129794.0;Cluster-129794.11;Cluster-129794.12;Cluster-129794.13;Cluster-129794.14;Cluster-129794.2;Cluster-129794.4;Cluster-129794.8;Cluster-129794.9;Cluster-133601.1;Cluster-133601.6;Cluster-133601.7;Cluster-134234.0;Cluster-134234.4;Cluster-134234.6;Cluster-19726.11;Cluster-19726.15;Cluster-19726.17;Cluster-19726.18;Cluster-19726.19;Cluster-19726.5;Clust…	130	https:\\www.genome.jp\dbget-bin\www_bget?map00410
ko00590	Arachidonic acid metabolism	91/25497 0.356904733890262%	186/60969 0.305073069920779%	0.0297185	1	Cluster-128419.0;Cluster-128419.1;Cluster-128419.3;Cluster-128419.5;Cluster-128419.6;Cluster-26574.20;Cluster-26574.22;Cluster-57595.0;Cluster-112465.0;Cluster-112465.2;Cluster-112465.3;Cluster-112465.4;Cluster-112465.5;Cluster-112465.6;Cluster-112465.7;Cluster-115094.0;Cluster-115094.1;Cluster-115094.2;Cluster-115094.3;Cluster-115094.7;Cluster-122426.0;Cluster-129460.0;Cluster-129460.2;Cluster-1…	91	Cluster-128419.5;Cluster-128419.6;Cluster-112465.0;Cluster-112465.2;Cluster-112465.3;Cluster-112465.6;Cluster-115094.0;Cluster-115094.1;Cluster-115094.7;Cluster-122426.0;Cluster-129460.0;Cluster-14853.39;Cluster-14853.40;Cluster-14853.42;Cluster-14853.44;Cluster-90353.3;Cluster-122874.2;Cluster-122874.3;Cluster-122874.7;Cluster-122874.8;Cluster-85382.0;Cluster-74187.0;Cluster-9173.164;Cluster-917…	49	Cluster-128419.0;Cluster-128419.1;Cluster-128419.3;Cluster-26574.20;Cluster-26574.22;Cluster-57595.0;Cluster-112465.4;Cluster-112465.5;Cluster-112465.7;Cluster-115094.2;Cluster-115094.3;Cluster-129460.2;Cluster-90353.1;Cluster-90353.4;Cluster-122874.0;Cluster-122874.4;Cluster-85382.1;Cluster-85382.3;Cluster-74187.1;Cluster-9173.167;Cluster-29419.2;Cluster-109211.6;Cluster-115294.0;Cluster-126730.…	42	https:\\www.genome.jp\dbget-bin\www_bget?map00590
ko00750	Vitamin B6 metabolism	52/25497 0.203945562223007%	101/60969 0.165657957322574%	0.031421	1	Cluster-97506.0;Cluster-111953.0;Cluster-115769.0;Cluster-115769.1;Cluster-115769.2;Cluster-115769.5;Cluster-20857.0;Cluster-57271.0;Cluster-61456.1;Cluster-91534.3;Cluster-98170.0;Cluster-98170.3;Cluster-98170.4;Cluster-98170.5;Cluster-98170.6;Cluster-98170.7;Cluster-122732.0;Cluster-122732.1;Cluster-122732.3;Cluster-122732.4;Cluster-122732.5;Cluster-122732.6;Cluster-102588.0;Cluster-11297.3;Clu…	52	Cluster-115769.0;Cluster-115769.5;Cluster-20857.0;Cluster-57271.0;Cluster-91534.3;Cluster-98170.0;Cluster-98170.3;Cluster-98170.5;Cluster-122732.0;Cluster-122732.5;Cluster-11297.3;Cluster-11297.6;Cluster-11297.7;Cluster-116451.5;Cluster-35272.0;Cluster-122204.1;Cluster-131757.0;Cluster-62378.0;Cluster-87891.0;Cluster-96869.0;Cluster-123399.6;Cluster-6122.12;Cluster-134389.2;Cluster-119820.1	24	Cluster-97506.0;Cluster-111953.0;Cluster-115769.1;Cluster-115769.2;Cluster-61456.1;Cluster-98170.4;Cluster-98170.6;Cluster-98170.7;Cluster-122732.1;Cluster-122732.3;Cluster-122732.4;Cluster-122732.6;Cluster-102588.0;Cluster-116451.0;Cluster-122204.7;Cluster-122204.8;Cluster-123399.0;Cluster-123399.3;Cluster-123399.4;Cluster-123399.5;Cluster-125713.0;Cluster-125713.1;Cluster-125713.2;Cluster-6122.…	28	https:\\www.genome.jp\dbget-bin\www_bget?map00750
ko00402	Benzoxazinoid biosynthesis苯并恶唑嗪酮类化合物	15/25497 0.0588304506412519%	24/60969 0.0393642670865522%	0.0331986	1	Cluster-103666.0;Cluster-52886.1;Cluster-52886.2;Cluster-66218.10;Cluster-66218.12;Cluster-66218.15;Cluster-66218.16;Cluster-66218.18;Cluster-66218.19;Cluster-66218.20;Cluster-66218.6;Cluster-66218.7;Cluster-66218.8;Cluster-66218.9;Cluster-97591.0	15	Cluster-66218.10;Cluster-66218.8	2	Cluster-103666.0;Cluster-52886.1;Cluster-52886.2;Cluster-66218.12;Cluster-66218.15;Cluster-66218.16;Cluster-66218.18;Cluster-66218.19;Cluster-66218.20;Cluster-66218.6;Cluster-66218.7;Cluster-66218.9;Cluster-97591.0	13	https:\\www.genome.jp\dbget-bin\www_bget?map00402
ko01232	Nucleotide metabolism	411/25497 1.6119543475703%	920/60969 1.50896357165117%	0.0416697	1	Cluster-35633.2;Cluster-35633.3;Cluster-35633.4;Cluster-35633.7;Cluster-35633.9;Cluster-105034.0;Cluster-105034.1;Cluster-82954.0;Cluster-98500.0;Cluster-117372.2;Cluster-129145.10;Cluster-129145.3;Cluster-129145.5;Cluster-129145.6;Cluster-129145.7;Cluster-129145.8;Cluster-129145.9;Cluster-93839.1;Cluster-93839.6;Cluster-22897.11;Cluster-22897.12;Cluster-22897.14;Cluster-22897.3;Cluster-22897.4;C…	411	Cluster-35633.2;Cluster-35633.9;Cluster-105034.0;Cluster-129145.3;Cluster-129145.6;Cluster-129145.7;Cluster-129145.8;Cluster-93839.1;Cluster-22897.11;Cluster-22897.14;Cluster-22897.3;Cluster-22897.9;Cluster-119261.0;Cluster-27438.0;Cluster-65670.2;Cluster-65670.3;Cluster-95719.6;Cluster-110523.0;Cluster-110523.3;Cluster-110523.4;Cluster-122239.0;Cluster-128601.1;Cluster-128601.6;Cluster-128601.7;…	221	Cluster-35633.3;Cluster-35633.4;Cluster-35633.7;Cluster-105034.1;Cluster-82954.0;Cluster-98500.0;Cluster-117372.2;Cluster-129145.10;Cluster-129145.5;Cluster-129145.9;Cluster-93839.6;Cluster-22897.12;Cluster-22897.4;Cluster-22897.8;Cluster-65670.1;Cluster-65670.4;Cluster-65670.5;Cluster-85420.1;Cluster-114668.1;Cluster-95719.0;Cluster-110523.1;Cluster-110523.2;Cluster-128601.3;Cluster-128601.9;Clu…	190	https:\\www.genome.jp\dbget-bin\www_bget?map01232
ko00561	Glycerolipid metabolism	454/25497 1.78060163940856%	1020/60969 1.67298135117847%	0.0425765	1	Cluster-109215.1;Cluster-109215.2;Cluster-111450.1;Cluster-111450.3;Cluster-124097.0;Cluster-124097.1;Cluster-124097.7;Cluster-124338.1;Cluster-50528.41;Cluster-50528.48;Cluster-50528.49;Cluster-50528.50;Cluster-50528.71;Cluster-50528.76;Cluster-50528.79;Cluster-50528.84;Cluster-93999.0;Cluster-113514.0;Cluster-113514.1;Cluster-113514.2;Cluster-129794.0;Cluster-129794.11;Cluster-129794.12;Cluster…	454	Cluster-109215.2;Cluster-50528.41;Cluster-50528.48;Cluster-50528.49;Cluster-50528.50;Cluster-50528.71;Cluster-50528.76;Cluster-50528.79;Cluster-50528.84;Cluster-113514.1;Cluster-129794.16;Cluster-129794.17;Cluster-129794.19;Cluster-129794.3;Cluster-133601.0;Cluster-133601.2;Cluster-133601.4;Cluster-134234.1;Cluster-134234.2;Cluster-134234.3;Cluster-134234.5;Cluster-134234.8;Cluster-134234.9;Clust…	229	Cluster-109215.1;Cluster-111450.1;Cluster-111450.3;Cluster-124097.0;Cluster-124097.1;Cluster-124097.7;Cluster-124338.1;Cluster-93999.0;Cluster-113514.0;Cluster-113514.2;Cluster-129794.0;Cluster-129794.11;Cluster-129794.12;Cluster-129794.13;Cluster-129794.14;Cluster-129794.2;Cluster-129794.4;Cluster-129794.8;Cluster-129794.9;Cluster-133601.1;Cluster-133601.6;Cluster-133601.7;Cluster-134234.0;Clust…	225	https:\\www.genome.jp\dbget-bin\www_bget?map00561

## Sheet: D-rhizome_vs_X-rhizome
Supplementary Table S6 KEGG pathway analysis of DEGs in different groups (2)
KEGG_map	Description	GeneRatio	BgRatio	P-value	Adjusted P-value	All_gene	Count_all	Up_gene	Count_up	Down_gene	Count_down	hyperlink
ko03010	Ribosome	1389/24220 5.73492981007432%	3050/60969 5.00254227558267%	5.09037e-12	7.43194e-10	Cluster-128216.0;Cluster-26278.2;Cluster-26278.8;Cluster-64666.2;Cluster-66799.0;Cluster-66799.1;Cluster-75124.0;Cluster-114321.1;Cluster-114321.2;Cluster-114321.3;Cluster-114321.8;Cluster-119886.0;Cluster-119886.1;Cluster-119886.2;Cluster-119886.3;Cluster-119886.5;Cluster-119886.6;Cluster-114718.2;Cluster-114810.11;Cluster-114810.2;Cluster-114810.3;Cluster-114810.5;Cluster-114810.6;Cluster-11481…	1389	Cluster-128216.0;Cluster-26278.2;Cluster-26278.8;Cluster-64666.2;Cluster-66799.0;Cluster-66799.1;Cluster-114321.3;Cluster-114321.8;Cluster-119886.0;Cluster-119886.1;Cluster-119886.2;Cluster-119886.5;Cluster-114810.11;Cluster-114810.3;Cluster-114810.7;Cluster-24646.0;Cluster-109283.1;Cluster-111416.0;Cluster-7727.14;Cluster-7727.4;Cluster-7727.5;Cluster-7727.8;Cluster-134755.1;Cluster-134755.3;Clu…	703	Cluster-75124.0;Cluster-114321.1;Cluster-114321.2;Cluster-119886.3;Cluster-119886.6;Cluster-114718.2;Cluster-114810.2;Cluster-114810.5;Cluster-114810.6;Cluster-114810.8;Cluster-109283.0;Cluster-111416.1;Cluster-111416.4;Cluster-134755.0;Cluster-134755.12;Cluster-134755.4;Cluster-134755.7;Cluster-134755.9;Cluster-126279.2;Cluster-126279.5;Cluster-126279.6;Cluster-126279.7;Cluster-126279.8;Cluster-…	686	https:\\www.genome.jp\dbget-bin\www_bget?map03010
ko03040	Spliceosome	1345/24220 5.5532617671346%	2960/60969 4.8549262740081%	5.63996e-11	8.23433e-09	Cluster-100532.1;Cluster-100532.2;Cluster-100532.3;Cluster-100532.5;Cluster-100532.6;Cluster-100590.0;Cluster-102008.2;Cluster-102361.0;Cluster-102361.1;Cluster-103157.0;Cluster-103157.1;Cluster-106407.2;Cluster-106407.4;Cluster-106407.5;Cluster-106929.0;Cluster-108235.0;Cluster-109046.0;Cluster-109046.1;Cluster-111583.1;Cluster-114443.1;Cluster-116844.0;Cluster-119084.1;Cluster-120162.385;Cluste…	1345	Cluster-100532.2;Cluster-100532.3;Cluster-100532.6;Cluster-102361.0;Cluster-103157.1;Cluster-106407.5;Cluster-109046.0;Cluster-109046.1;Cluster-111583.1;Cluster-119084.1;Cluster-120162.385;Cluster-120162.388;Cluster-120162.389;Cluster-120162.393;Cluster-120324.0;Cluster-122938.0;Cluster-122938.3;Cluster-122938.4;Cluster-123989.4;Cluster-123989.6;Cluster-123989.7;Cluster-123989.8;Cluster-125526.0;…	700	Cluster-100532.1;Cluster-100532.5;Cluster-100590.0;Cluster-102008.2;Cluster-102361.1;Cluster-103157.0;Cluster-106407.2;Cluster-106407.4;Cluster-106929.0;Cluster-108235.0;Cluster-114443.1;Cluster-116844.0;Cluster-120162.390;Cluster-120162.391;Cluster-120162.392;Cluster-120306.0;Cluster-122938.2;Cluster-122938.5;Cluster-125526.3;Cluster-125526.5;Cluster-125645.11;Cluster-125645.14;Cluster-125645.20…	645	https:\\www.genome.jp\dbget-bin\www_bget?map03040
ko04141	Protein processing in endoplasmic reticulum	1258/24220 5.19405450041288%	2824/60969 4.63186209385097%	5.39193e-08	7.87222e-06	Cluster-107304.0;Cluster-107304.2;Cluster-107304.3;Cluster-28518.1;Cluster-28518.2;Cluster-49920.3;Cluster-122110.0;Cluster-122110.1;Cluster-122110.2;Cluster-122110.3;Cluster-122110.4;Cluster-127685.4;Cluster-129701.1;Cluster-19855.13;Cluster-19855.14;Cluster-19855.16;Cluster-19855.18;Cluster-19855.19;Cluster-19855.21;Cluster-24517.11;Cluster-24517.7;Cluster-24517.9;Cluster-31198.4;Cluster-31198.…	1258	Cluster-107304.2;Cluster-107304.3;Cluster-28518.1;Cluster-28518.2;Cluster-49920.3;Cluster-122110.0;Cluster-122110.1;Cluster-122110.4;Cluster-19855.14;Cluster-19855.16;Cluster-19855.19;Cluster-24517.11;Cluster-24517.7;Cluster-24517.9;Cluster-31198.4;Cluster-31198.5;Cluster-81005.28;Cluster-81900.1;Cluster-81900.2;Cluster-105668.0;Cluster-105668.3;Cluster-122204.2;Cluster-36427.2;Cluster-36427.23;C…	644	Cluster-107304.0;Cluster-122110.2;Cluster-122110.3;Cluster-127685.4;Cluster-129701.1;Cluster-19855.13;Cluster-19855.18;Cluster-19855.21;Cluster-36452.23;Cluster-36452.64;Cluster-81005.22;Cluster-81900.4;Cluster-91610.2;Cluster-94582.1;Cluster-105668.2;Cluster-105668.4;Cluster-105668.5;Cluster-105668.6;Cluster-122204.3;Cluster-122204.4;Cluster-122204.6;Cluster-36427.26;Cluster-36427.5;Cluster-3642…	614	https:\\www.genome.jp\dbget-bin\www_bget?map04141
ko03008	Ribosome biogenesis in eukaryotes	688/24220 2.84062758051197%	1511/60969 2.47830864865751%	1.96534e-06	0.00028694	Cluster-16867.6;Cluster-16867.7;Cluster-16867.9;Cluster-22805.0;Cluster-48228.2;Cluster-48228.5;Cluster-48228.6;Cluster-79212.0;Cluster-79212.4;Cluster-101006.0;Cluster-101317.0;Cluster-101411.0;Cluster-103129.0;Cluster-109447.0;Cluster-109447.1;Cluster-109447.2;Cluster-113311.0;Cluster-113311.1;Cluster-113311.3;Cluster-122667.0;Cluster-122746.0;Cluster-122746.1;Cluster-122746.2;Cluster-122746.4;…	688	Cluster-16867.7;Cluster-16867.9;Cluster-22805.0;Cluster-48228.2;Cluster-48228.6;Cluster-79212.0;Cluster-101411.0;Cluster-109447.2;Cluster-113311.0;Cluster-122746.1;Cluster-122746.2;Cluster-122746.4;Cluster-126914.4;Cluster-18799.7;Cluster-35586.14;Cluster-35586.18;Cluster-35586.19;Cluster-35586.21;Cluster-100117.2;Cluster-121297.2;Cluster-121297.3;Cluster-121297.4;Cluster-121297.7;Cluster-121297.…	334	Cluster-16867.6;Cluster-48228.5;Cluster-79212.4;Cluster-101006.0;Cluster-101317.0;Cluster-103129.0;Cluster-109447.0;Cluster-109447.1;Cluster-113311.1;Cluster-113311.3;Cluster-122667.0;Cluster-122746.0;Cluster-122746.6;Cluster-35586.20;Cluster-35586.22;Cluster-35586.4;Cluster-35586.5;Cluster-35586.6;Cluster-35586.9;Cluster-121297.0;Cluster-121297.5;Cluster-121297.9;Cluster-132442.1;Cluster-132442.…	354	https:\\www.genome.jp\dbget-bin\www_bget?map03008
ko04712	Circadian rhythm - plant	292/24220 1.2056151940545%	616/60969 1.01034952188817%	6.11367e-05	0.00892596	Cluster-100412.0;Cluster-100412.1;Cluster-100412.3;Cluster-100412.6;Cluster-100412.9;Cluster-111389.0;Cluster-111389.1;Cluster-113575.2;Cluster-125627.0;Cluster-125627.1;Cluster-125627.2;Cluster-19948.0;Cluster-60317.4;Cluster-60317.5;Cluster-101006.0;Cluster-101317.0;Cluster-101411.0;Cluster-103129.0;Cluster-109447.0;Cluster-109447.1;Cluster-109447.2;Cluster-113311.0;Cluster-113311.1;Cluster-113…	292	Cluster-100412.0;Cluster-100412.1;Cluster-100412.6;Cluster-100412.9;Cluster-111389.0;Cluster-113575.2;Cluster-125627.2;Cluster-19948.0;Cluster-101411.0;Cluster-109447.2;Cluster-113311.0;Cluster-122746.1;Cluster-122746.2;Cluster-122746.4;Cluster-126914.4;Cluster-18799.7;Cluster-35586.14;Cluster-35586.18;Cluster-35586.19;Cluster-35586.21;Cluster-100117.2;Cluster-121297.2;Cluster-121297.3;Cluster-12…	154	Cluster-100412.3;Cluster-111389.1;Cluster-125627.0;Cluster-125627.1;Cluster-60317.4;Cluster-60317.5;Cluster-101006.0;Cluster-101317.0;Cluster-103129.0;Cluster-109447.0;Cluster-109447.1;Cluster-113311.1;Cluster-113311.3;Cluster-122667.0;Cluster-122746.0;Cluster-122746.6;Cluster-35586.20;Cluster-35586.22;Cluster-35586.4;Cluster-35586.5;Cluster-35586.6;Cluster-35586.9;Cluster-121297.0;Cluster-121297…	138	https:\\www.genome.jp\dbget-bin\www_bget?map04712
ko00240	Pyrimidine metabolism	308/24220 1.27167630057803%	660/60969 1.08251734488019%	0.000160492	0.0234318	Cluster-101892.0;Cluster-101892.1;Cluster-51991.1;Cluster-81090.1;Cluster-22897.11;Cluster-22897.12;Cluster-22897.8;Cluster-22897.9;Cluster-111165.0;Cluster-114668.1;Cluster-95719.0;Cluster-100349.0;Cluster-110523.0;Cluster-110523.1;Cluster-110523.2;Cluster-110523.3;Cluster-110523.4;Cluster-122239.0;Cluster-128601.1;Cluster-128601.3;Cluster-128601.6;Cluster-128601.9;Cluster-131562.2;Cluster-13156…	308	Cluster-101892.1;Cluster-22897.11;Cluster-22897.9;Cluster-110523.0;Cluster-110523.3;Cluster-110523.4;Cluster-122239.0;Cluster-128601.1;Cluster-128601.6;Cluster-131562.2;Cluster-131562.4;Cluster-131562.5;Cluster-131562.6;Cluster-37484.0;Cluster-38001.0;Cluster-38936.2;Cluster-38936.5;Cluster-9198.3;Cluster-110954.2;Cluster-120345.0;Cluster-120345.3;Cluster-129032.0;Cluster-129032.1;Cluster-129032.…	147	Cluster-101892.0;Cluster-51991.1;Cluster-81090.1;Cluster-22897.12;Cluster-22897.8;Cluster-111165.0;Cluster-114668.1;Cluster-95719.0;Cluster-100349.0;Cluster-110523.1;Cluster-110523.2;Cluster-128601.3;Cluster-128601.9;Cluster-38936.3;Cluster-38936.6;Cluster-9198.1;Cluster-110954.3;Cluster-110954.4;Cluster-120345.1;Cluster-120345.4;Cluster-120345.5;Cluster-129032.2;Cluster-129032.3;Cluster-129032.5…	161	https:\\www.genome.jp\dbget-bin\www_bget?map00240
ko04120	Ubiquitin mediated proteolysis	818/24220 3.37737407101569%	1887/60969 3.09501549968017%	0.000616426	0.0899981	Cluster-116807.0;Cluster-116807.1;Cluster-116807.3;Cluster-116807.5;Cluster-117893.0;Cluster-26303.1;Cluster-26303.4;Cluster-39748.0;Cluster-47589.143;Cluster-47589.175;Cluster-47589.183;Cluster-47589.203;Cluster-47589.204;Cluster-47589.230;Cluster-47589.231;Cluster-47589.232;Cluster-47589.233;Cluster-47589.234;Cluster-47589.235;Cluster-47589.239;Cluster-47589.259;Cluster-47589.261;Cluster-47589.…	818	Cluster-26303.1;Cluster-26303.4;Cluster-39748.0;Cluster-47589.183;Cluster-47589.231;Cluster-47589.234;Cluster-47589.239;Cluster-47589.261;Cluster-47589.74;Cluster-47589.76;Cluster-47589.84;Cluster-47589.95;Cluster-54243.836;Cluster-54243.841;Cluster-55160.0;Cluster-47589.141;Cluster-47589.154;Cluster-47589.158;Cluster-47589.161;Cluster-47589.181;Cluster-47589.455;Cluster-47589.68;Cluster-59605.0;…	417	Cluster-116807.0;Cluster-116807.1;Cluster-116807.3;Cluster-116807.5;Cluster-117893.0;Cluster-47589.143;Cluster-47589.175;Cluster-47589.203;Cluster-47589.204;Cluster-47589.230;Cluster-47589.232;Cluster-47589.233;Cluster-47589.235;Cluster-47589.259;Cluster-47589.69;Cluster-47589.75;Cluster-47589.83;Cluster-62101.1;Cluster-6536.35;Cluster-73750.1;Cluster-74643.3;Cluster-88832.0;Cluster-47589.155;Clu…	401	https:\\www.genome.jp\dbget-bin\www_bget?map04120
ko03022	Basal transcription factors	189/24220 0.780346820809249%	399/60969 0.65443094031393%	0.00112345	0.164024	Cluster-129567.1;Cluster-129567.2;Cluster-129567.3;Cluster-129567.4;Cluster-129567.5;Cluster-129567.6;Cluster-131541.0;Cluster-131541.1;Cluster-131541.3;Cluster-131541.5;Cluster-131541.6;Cluster-131541.8;Cluster-131541.9;Cluster-134124.0;Cluster-134124.1;Cluster-134124.3;Cluster-134124.4;Cluster-134124.6;Cluster-134124.7;Cluster-48144.7;Cluster-48144.8;Cluster-110937.2;Cluster-110937.3;Cluster-12…	189	Cluster-129567.1;Cluster-129567.2;Cluster-129567.3;Cluster-129567.4;Cluster-131541.5;Cluster-131541.6;Cluster-131541.8;Cluster-134124.4;Cluster-134124.6;Cluster-134124.7;Cluster-48144.7;Cluster-48144.8;Cluster-110937.3;Cluster-126824.2;Cluster-126824.3;Cluster-130975.3;Cluster-130975.4;Cluster-50496.5;Cluster-50496.6;Cluster-64579.4;Cluster-68384.2;Cluster-68384.4;Cluster-68384.7;Cluster-9988.35;…	104	Cluster-129567.5;Cluster-129567.6;Cluster-131541.0;Cluster-131541.1;Cluster-131541.3;Cluster-131541.9;Cluster-134124.0;Cluster-134124.1;Cluster-134124.3;Cluster-110937.2;Cluster-126824.1;Cluster-129264.0;Cluster-130975.0;Cluster-130975.7;Cluster-50496.12;Cluster-50496.8;Cluster-64579.7;Cluster-68384.5;Cluster-68384.6;Cluster-110450.0;Cluster-110450.2;Cluster-102327.2;Cluster-124072.0;Cluster-1111…	85	https:\\www.genome.jp\dbget-bin\www_bget?map03022
ko03050	Proteasome	301/24220 1.24277456647399%	660/60969 1.08251734488019%	0.00116158	0.169591	Cluster-120489.2;Cluster-131825.0;Cluster-131825.1;Cluster-131825.2;Cluster-131825.3;Cluster-131825.4;Cluster-131825.6;Cluster-131825.7;Cluster-131825.9;Cluster-115374.1;Cluster-115374.2;Cluster-115374.3;Cluster-69514.0;Cluster-95700.1;Cluster-95700.2;Cluster-95700.4;Cluster-95700.5;Cluster-95700.6;Cluster-59610.0;Cluster-59610.1;Cluster-59610.4;Cluster-59610.5;Cluster-99549.0;Cluster-125632.0;Cl…	301	Cluster-131825.1;Cluster-131825.2;Cluster-131825.6;Cluster-131825.7;Cluster-115374.2;Cluster-115374.3;Cluster-95700.2;Cluster-95700.6;Cluster-59610.0;Cluster-59610.1;Cluster-125632.2;Cluster-125632.3;Cluster-125632.7;Cluster-30248.0;Cluster-30248.1;Cluster-30248.4;Cluster-30248.6;Cluster-129577.1;Cluster-129577.2;Cluster-129577.3;Cluster-129577.4;Cluster-28096.19;Cluster-127749.1;Cluster-127749.2…	153	Cluster-120489.2;Cluster-131825.0;Cluster-131825.3;Cluster-131825.4;Cluster-131825.9;Cluster-115374.1;Cluster-69514.0;Cluster-95700.1;Cluster-95700.4;Cluster-95700.5;Cluster-59610.4;Cluster-59610.5;Cluster-99549.0;Cluster-125632.0;Cluster-125632.1;Cluster-125632.5;Cluster-66054.2;Cluster-118364.0;Cluster-30248.2;Cluster-30248.5;Cluster-129577.0;Cluster-129577.5;Cluster-129577.6;Cluster-28096.14;C…	148	https:\\www.genome.jp\dbget-bin\www_bget?map03050
ko00410	beta-Alanine metabolism	239/24220 0.986787778695293%	526/60969 0.862733520313602%	0.00428382	0.625437	Cluster-107475.0;Cluster-113514.0;Cluster-113514.1;Cluster-113514.2;Cluster-126911.0;Cluster-129794.0;Cluster-129794.10;Cluster-129794.12;Cluster-129794.13;Cluster-129794.14;Cluster-129794.15;Cluster-129794.16;Cluster-129794.17;Cluster-129794.19;Cluster-129794.3;Cluster-129794.5;Cluster-133601.0;Cluster-133601.2;Cluster-133601.7;Cluster-134234.0;Cluster-134234.1;Cluster-134234.2;Cluster-134234.3;…	239	Cluster-113514.1;Cluster-129794.10;Cluster-129794.15;Cluster-129794.16;Cluster-129794.17;Cluster-129794.19;Cluster-129794.3;Cluster-133601.0;Cluster-133601.2;Cluster-134234.1;Cluster-134234.2;Cluster-134234.3;Cluster-134234.5;Cluster-134234.8;Cluster-134234.9;Cluster-19726.16;Cluster-31268.1;Cluster-49645.11;Cluster-49645.13;Cluster-49645.15;Cluster-49645.18;Cluster-49645.2;Cluster-49645.20;Clust…	110	Cluster-107475.0;Cluster-113514.0;Cluster-113514.2;Cluster-126911.0;Cluster-129794.0;Cluster-129794.12;Cluster-129794.13;Cluster-129794.14;Cluster-129794.5;Cluster-133601.7;Cluster-134234.0;Cluster-134234.4;Cluster-134234.6;Cluster-19726.11;Cluster-19726.15;Cluster-19726.17;Cluster-19726.19;Cluster-19726.5;Cluster-49645.10;Cluster-49645.14;Cluster-49645.16;Cluster-72338.0;Cluster-37399.10;Cluster…	129	https:\\www.genome.jp\dbget-bin\www_bget?map00410
ko04144	Endocytosis	917/24220 3.78612716763006%	2181/60969 3.57722777149043%	0.0129684	1	Cluster-104478.0;Cluster-107487.2;Cluster-114058.0;Cluster-128964.0;Cluster-72149.0;Cluster-74258.5;Cluster-74258.9;Cluster-78668.2;Cluster-78668.4;Cluster-78668.6;Cluster-104834.0;Cluster-104834.1;Cluster-104834.2;Cluster-104834.3;Cluster-104834.4;Cluster-106893.0;Cluster-121279.1;Cluster-121279.2;Cluster-121279.3;Cluster-121279.4;Cluster-122359.0;Cluster-122359.1;Cluster-122359.2;Cluster-122359…	917	Cluster-128964.0;Cluster-72149.0;Cluster-74258.5;Cluster-78668.4;Cluster-104834.0;Cluster-104834.2;Cluster-104834.3;Cluster-104834.4;Cluster-106893.0;Cluster-121279.2;Cluster-121279.4;Cluster-122359.2;Cluster-122359.3;Cluster-122359.4;Cluster-126826.4;Cluster-39806.0;Cluster-52330.1;Cluster-52330.4;Cluster-52330.5;Cluster-66739.6;Cluster-75858.0;Cluster-83014.0;Cluster-86887.2;Cluster-86887.5;Clu…	501	Cluster-104478.0;Cluster-107487.2;Cluster-114058.0;Cluster-74258.9;Cluster-78668.2;Cluster-78668.6;Cluster-104834.1;Cluster-121279.1;Cluster-121279.3;Cluster-122359.0;Cluster-122359.1;Cluster-52330.11;Cluster-52330.12;Cluster-52330.2;Cluster-59257.486;Cluster-59257.529;Cluster-66739.3;Cluster-68882.104;Cluster-68882.233;Cluster-82399.0;Cluster-86887.3;Cluster-86887.7;Cluster-86887.8;Cluster-90323…	416	https:\\www.genome.jp\dbget-bin\www_bget?map04144
ko00590	Arachidonic acid metabolism	89/24220 0.367464905037159%	186/60969 0.305073069920779%	0.0147247	1	Cluster-128419.0;Cluster-128419.3;Cluster-128419.4;Cluster-128419.5;Cluster-128419.6;Cluster-26574.20;Cluster-26574.22;Cluster-112465.0;Cluster-112465.2;Cluster-112465.3;Cluster-112465.5;Cluster-112465.6;Cluster-112465.7;Cluster-115094.0;Cluster-115094.1;Cluster-115094.2;Cluster-115094.3;Cluster-115094.7;Cluster-129460.0;Cluster-14853.39;Cluster-14853.40;Cluster-14853.42;Cluster-14853.44;Cluster-…	89	Cluster-128419.4;Cluster-128419.5;Cluster-128419.6;Cluster-112465.0;Cluster-112465.2;Cluster-112465.3;Cluster-112465.6;Cluster-115094.0;Cluster-115094.1;Cluster-115094.7;Cluster-129460.0;Cluster-14853.39;Cluster-14853.40;Cluster-14853.42;Cluster-14853.44;Cluster-90353.3;Cluster-122874.2;Cluster-122874.3;Cluster-34602.0;Cluster-74187.0;Cluster-83509.0;Cluster-9173.164;Cluster-9173.165;Cluster-9173…	53	Cluster-128419.0;Cluster-128419.3;Cluster-26574.20;Cluster-26574.22;Cluster-112465.5;Cluster-112465.7;Cluster-115094.2;Cluster-115094.3;Cluster-90353.1;Cluster-90353.4;Cluster-122874.4;Cluster-85382.1;Cluster-85382.3;Cluster-74187.1;Cluster-9173.167;Cluster-29419.2;Cluster-109211.6;Cluster-115294.0;Cluster-126730.3;Cluster-131323.6;Cluster-131807.4;Cluster-84451.0;Cluster-94213.0;Cluster-98061.0;…	36	https:\\www.genome.jp\dbget-bin\www_bget?map00590
ko00780	Biotin metabolism	102/24220 0.421139554087531%	216/60969 0.35427840377897%	0.0149393	1	Cluster-101507.1;Cluster-101507.2;Cluster-102259.0;Cluster-102259.1;Cluster-102259.2;Cluster-110554.2;Cluster-110554.3;Cluster-114028.2;Cluster-114028.3;Cluster-114028.4;Cluster-115982.1;Cluster-115982.3;Cluster-115982.5;Cluster-121085.0;Cluster-124443.10;Cluster-124443.5;Cluster-124443.6;Cluster-124443.8;Cluster-135429.0;Cluster-135429.1;Cluster-135429.2;Cluster-135429.3;Cluster-135429.5;Cluster…	102	Cluster-101507.2;Cluster-102259.0;Cluster-110554.2;Cluster-114028.2;Cluster-114028.3;Cluster-115982.1;Cluster-121085.0;Cluster-124443.10;Cluster-124443.5;Cluster-124443.6;Cluster-124443.8;Cluster-135429.1;Cluster-135429.2;Cluster-80223.0;Cluster-91294.0;Cluster-91294.4;Cluster-112744.12;Cluster-112744.14;Cluster-112744.8;Cluster-36758.2;Cluster-36758.3;Cluster-67234.0;Cluster-67234.1;Cluster-1353…	48	Cluster-101507.1;Cluster-102259.1;Cluster-102259.2;Cluster-110554.3;Cluster-114028.4;Cluster-115982.3;Cluster-115982.5;Cluster-135429.0;Cluster-135429.3;Cluster-135429.5;Cluster-38334.3;Cluster-91294.3;Cluster-97267.4;Cluster-112744.10;Cluster-112744.13;Cluster-112744.16;Cluster-112744.3;Cluster-112744.7;Cluster-118139.2;Cluster-120555.1;Cluster-67234.3;Cluster-73339.0;Cluster-135330.2;Cluster-13…	54	https:\\www.genome.jp\dbget-bin\www_bget?map00780
ko03015	mRNA surveillance pathway	698/24220 2.88191577208918%	1656/60969 2.7161344289721%	0.0219956	1	Cluster-109137.0;Cluster-109137.1;Cluster-116390.3;Cluster-116390.6;Cluster-116390.8;Cluster-22494.0;Cluster-22889.41;Cluster-22889.50;Cluster-22889.65;Cluster-28245.11;Cluster-28245.13;Cluster-28245.3;Cluster-47776.0;Cluster-74823.2;Cluster-75577.0;Cluster-75577.1;Cluster-96352.0;Cluster-99389.0;Cluster-99389.1;Cluster-115663.0;Cluster-115663.2;Cluster-115663.3;Cluster-115663.4;Cluster-115663.6;…	698	Cluster-109137.1;Cluster-22494.0;Cluster-22889.41;Cluster-28245.13;Cluster-28245.3;Cluster-47776.0;Cluster-74823.2;Cluster-75577.1;Cluster-115663.0;Cluster-115663.2;Cluster-115663.6;Cluster-130457.2;Cluster-130457.4;Cluster-22909.0;Cluster-58778.0;Cluster-58778.1;Cluster-134664.10;Cluster-134664.12;Cluster-134664.2;Cluster-134664.5;Cluster-134664.8;Cluster-26580.0;Cluster-52586.10;Cluster-52586.1…	362	Cluster-109137.0;Cluster-116390.3;Cluster-116390.6;Cluster-116390.8;Cluster-22889.50;Cluster-22889.65;Cluster-28245.11;Cluster-75577.0;Cluster-96352.0;Cluster-99389.0;Cluster-99389.1;Cluster-115663.3;Cluster-115663.4;Cluster-130457.0;Cluster-130457.1;Cluster-134664.1;Cluster-134664.11;Cluster-134664.13;Cluster-134664.9;Cluster-52586.1;Cluster-52586.13;Cluster-52586.4;Cluster-52586.6;Cluster-10673…	336	https:\\www.genome.jp\dbget-bin\www_bget?map03015
ko00563	Glycosylphosphatidylinositol (GPI)-anchor biosynthesis	157/24220 0.64822460776218%	348/60969 0.570781872755007%	0.0229612	1	Cluster-101340.1;Cluster-101340.2;Cluster-101340.3;Cluster-101340.4;Cluster-101340.5;Cluster-101340.6;Cluster-11740.66;Cluster-11740.67;Cluster-109543.0;Cluster-130090.12;Cluster-130090.13;Cluster-36421.20;Cluster-36421.21;Cluster-36421.23;Cluster-36421.25;Cluster-36421.30;Cluster-36421.7;Cluster-118573.2;Cluster-118573.3;Cluster-118573.4;Cluster-132819.39;Cluster-132819.44;Cluster-132819.45;Clus…	157	Cluster-101340.1;Cluster-101340.4;Cluster-101340.5;Cluster-101340.6;Cluster-11740.66;Cluster-11740.67;Cluster-130090.12;Cluster-130090.13;Cluster-36421.30;Cluster-118573.4;Cluster-132819.46;Cluster-132819.48;Cluster-132819.52;Cluster-105442.0;Cluster-105681.1;Cluster-105681.6;Cluster-119535.0;Cluster-122620.1;Cluster-122620.2;Cluster-122620.3;Cluster-128333.5;Cluster-24895.2;Cluster-24895.4;Clust…	83	Cluster-101340.2;Cluster-101340.3;Cluster-109543.0;Cluster-36421.20;Cluster-36421.21;Cluster-36421.23;Cluster-36421.25;Cluster-36421.7;Cluster-118573.2;Cluster-118573.3;Cluster-132819.39;Cluster-132819.44;Cluster-132819.45;Cluster-90247.1;Cluster-105681.4;Cluster-119535.1;Cluster-122620.0;Cluster-128333.4;Cluster-128333.6;Cluster-128333.8;Cluster-128333.9;Cluster-130166.2;Cluster-24895.1;Cluster-…	74	https:\\www.genome.jp\dbget-bin\www_bget?map00563
ko03250	Viral life cycle - HIV-1	204/24220 0.842279108175062%	461/60969 0.756121963620856%	0.0263082	1	Cluster-123324.1;Cluster-123324.4;Cluster-17211.21;Cluster-66810.35;Cluster-79095.13;Cluster-79095.15;Cluster-79095.17;Cluster-8626.92;Cluster-8626.94;Cluster-8626.96;Cluster-92002.1;Cluster-92002.10;Cluster-92002.3;Cluster-92002.4;Cluster-92002.6;Cluster-92002.7;Cluster-92002.8;Cluster-92002.9;Cluster-114491.0;Cluster-114491.1;Cluster-114491.2;Cluster-114491.5;Cluster-114491.6;Cluster-114491.9;C…	204	Cluster-123324.1;Cluster-79095.13;Cluster-79095.15;Cluster-8626.94;Cluster-8626.96;Cluster-92002.1;Cluster-92002.3;Cluster-92002.4;Cluster-92002.6;Cluster-114491.2;Cluster-114491.9;Cluster-123235.1;Cluster-23255.10;Cluster-23255.12;Cluster-23255.2;Cluster-23255.4;Cluster-23255.6;Cluster-34661.10;Cluster-34661.15;Cluster-34661.19;Cluster-34661.22;Cluster-34661.26;Cluster-34661.27;Cluster-35043.1;C…	110	Cluster-123324.4;Cluster-17211.21;Cluster-66810.35;Cluster-79095.17;Cluster-8626.92;Cluster-92002.10;Cluster-92002.7;Cluster-92002.8;Cluster-92002.9;Cluster-114491.0;Cluster-114491.1;Cluster-114491.5;Cluster-114491.6;Cluster-23255.5;Cluster-34661.11;Cluster-34661.12;Cluster-34661.18;Cluster-34661.25;Cluster-34661.28;Cluster-101012.0;Cluster-5408.125;Cluster-5408.129;Cluster-134744.2;Cluster-13185…	94	https:\\www.genome.jp\dbget-bin\www_bget?map03250
ko04122	Sulfur relay system	39/24220 0.161023947151115%	77/60969 0.126293690236022%	0.0336372	1	Cluster-65275.1;Cluster-65275.7;Cluster-65275.8;Cluster-101710.0;Cluster-101710.1;Cluster-58306.10;Cluster-58306.5;Cluster-58306.6;Cluster-58306.7;Cluster-58306.8;Cluster-129425.0;Cluster-129425.1;Cluster-129425.3;Cluster-129425.4;Cluster-129425.6;Cluster-129425.7;Cluster-105069.10;Cluster-105069.13;Cluster-105069.14;Cluster-105069.6;Cluster-105069.9;Cluster-106179.0;Cluster-106179.1;Cluster-1061…	39	Cluster-65275.7;Cluster-101710.0;Cluster-58306.10;Cluster-58306.6;Cluster-58306.8;Cluster-129425.0;Cluster-129425.1;Cluster-129425.6;Cluster-129425.7;Cluster-105069.10;Cluster-105069.13;Cluster-105069.14;Cluster-105069.9;Cluster-106179.0;Cluster-106179.2;Cluster-106179.5;Cluster-18122.120;Cluster-18122.134;Cluster-91178.3;Cluster-91178.4;Cluster-108550.1;Cluster-108550.2;Cluster-108550.4	23	Cluster-65275.1;Cluster-65275.8;Cluster-101710.1;Cluster-58306.5;Cluster-58306.7;Cluster-129425.3;Cluster-129425.4;Cluster-105069.6;Cluster-106179.1;Cluster-106179.3;Cluster-18122.143;Cluster-131830.2;Cluster-131830.4;Cluster-90421.0;Cluster-91178.1;Cluster-108550.3	16	https:\\www.genome.jp\dbget-bin\www_bget?map04122
ko00310	Lysine degradation	236/24220 0.974401321222131%	543/60969 0.890616542833243%	0.0410904	1	Cluster-107475.0;Cluster-113514.0;Cluster-113514.1;Cluster-113514.2;Cluster-126911.0;Cluster-129794.0;Cluster-129794.10;Cluster-129794.12;Cluster-129794.13;Cluster-129794.14;Cluster-129794.15;Cluster-129794.16;Cluster-129794.17;Cluster-129794.19;Cluster-129794.3;Cluster-129794.5;Cluster-133601.0;Cluster-133601.2;Cluster-133601.7;Cluster-134234.0;Cluster-134234.1;Cluster-134234.2;Cluster-134234.3;…	236	Cluster-113514.1;Cluster-129794.10;Cluster-129794.15;Cluster-129794.16;Cluster-129794.17;Cluster-129794.19;Cluster-129794.3;Cluster-133601.0;Cluster-133601.2;Cluster-134234.1;Cluster-134234.2;Cluster-134234.3;Cluster-134234.5;Cluster-134234.8;Cluster-134234.9;Cluster-19726.16;Cluster-31268.1;Cluster-49645.11;Cluster-49645.13;Cluster-49645.15;Cluster-49645.18;Cluster-49645.2;Cluster-49645.20;Clust…	111	Cluster-107475.0;Cluster-113514.0;Cluster-113514.2;Cluster-126911.0;Cluster-129794.0;Cluster-129794.12;Cluster-129794.13;Cluster-129794.14;Cluster-129794.5;Cluster-133601.7;Cluster-134234.0;Cluster-134234.4;Cluster-134234.6;Cluster-19726.11;Cluster-19726.15;Cluster-19726.17;Cluster-19726.19;Cluster-19726.5;Cluster-49645.10;Cluster-49645.14;Cluster-49645.16;Cluster-72338.0;Cluster-118159.0;Cluster…	125	https:\\www.genome.jp\dbget-bin\www_bget?map00310
ko03020	RNA polymerase	322/24220 1.32947976878613%	753/60969 1.23505387984057%	0.0472421	1	Cluster-131474.0;Cluster-118940.0;Cluster-118940.2;Cluster-118940.3;Cluster-118940.4;Cluster-114929.0;Cluster-114929.1;Cluster-114929.2;Cluster-114929.3;Cluster-114929.4;Cluster-114929.5;Cluster-116259.2;Cluster-116259.3;Cluster-118628.0;Cluster-10179.21;Cluster-10179.22;Cluster-102435.0;Cluster-10371.5;Cluster-10371.6;Cluster-10371.9;Cluster-104495.1;Cluster-105671.146;Cluster-105671.214;Cluster…	322	Cluster-131474.0;Cluster-118940.2;Cluster-118940.4;Cluster-114929.1;Cluster-114929.2;Cluster-114929.3;Cluster-114929.4;Cluster-116259.3;Cluster-10371.6;Cluster-105671.214;Cluster-105671.230;Cluster-106434.0;Cluster-22596.4;Cluster-24653.0;Cluster-26358.0;Cluster-27850.125;Cluster-28577.13;Cluster-29214.0;Cluster-32096.0;Cluster-33323.181;Cluster-33323.182;Cluster-33323.209;Cluster-33323.215;Clust…	164	Cluster-118940.0;Cluster-118940.3;Cluster-114929.0;Cluster-114929.5;Cluster-116259.2;Cluster-118628.0;Cluster-10179.21;Cluster-10179.22;Cluster-102435.0;Cluster-10371.5;Cluster-10371.9;Cluster-104495.1;Cluster-105671.146;Cluster-105671.243;Cluster-107836.0;Cluster-110454.0;Cluster-113620.1;Cluster-116730.11;Cluster-116730.7;Cluster-123670.2;Cluster-133580.9;Cluster-133857.0;Cluster-133857.3;Clust…	158	https:\\www.genome.jp\dbget-bin\www_bget?map03020

## Sheet: D-root_vs_X-root
Supplementary Table S6 KEGG pathway analysis of DEGs in different groups (3)
KEGG_map	Description	GeneRatio	BgRatio	P-value	Adjusted P-value	All_gene	Count_all	Up_gene	Count_up	Down_gene	Count_down	hyperlink
ko04141	Protein processing in endoplasmic reticulum	1379/26245 5.25433415888741%	2824/60969 4.63186209385097%	1.40285e-10	2.06219e-08	Cluster-107304.0;Cluster-107304.1;Cluster-107304.2;Cluster-28518.1;Cluster-28518.2;Cluster-122110.0;Cluster-122110.1;Cluster-122110.2;Cluster-122110.3;Cluster-122110.4;Cluster-129701.10;Cluster-129701.14;Cluster-19855.13;Cluster-19855.14;Cluster-19855.16;Cluster-19855.18;Cluster-19855.19;Cluster-19855.21;Cluster-24517.9;Cluster-31198.4;Cluster-31198.5;Cluster-36452.64;Cluster-58776.0;Cluster-8190…	1379	Cluster-107304.2;Cluster-28518.1;Cluster-28518.2;Cluster-122110.0;Cluster-122110.1;Cluster-122110.4;Cluster-129701.10;Cluster-19855.14;Cluster-19855.16;Cluster-19855.19;Cluster-24517.9;Cluster-31198.4;Cluster-31198.5;Cluster-81900.1;Cluster-81900.2;Cluster-105668.0;Cluster-105668.1;Cluster-105668.3;Cluster-122204.2;Cluster-2923.10;Cluster-2923.11;Cluster-2923.3;Cluster-2923.4;Cluster-2923.5;Clust…	736	Cluster-107304.0;Cluster-107304.1;Cluster-122110.2;Cluster-122110.3;Cluster-129701.14;Cluster-19855.13;Cluster-19855.18;Cluster-19855.21;Cluster-36452.64;Cluster-58776.0;Cluster-91610.1;Cluster-91610.2;Cluster-105668.2;Cluster-105668.4;Cluster-105668.5;Cluster-105668.6;Cluster-122204.3;Cluster-122204.6;Cluster-36427.26;Cluster-36427.27;Cluster-36427.5;Cluster-36427.6;Cluster-61268.0;Cluster-61268…	643	https:\\www.genome.jp\dbget-bin\www_bget?map04141
ko03040	Spliceosome	1433/26245 5.46008763574014%	2960/60969 4.8549262740081%	9.72e-10	1.42884e-07	Cluster-100532.1;Cluster-100532.2;Cluster-100532.3;Cluster-100532.5;Cluster-100532.6;Cluster-100590.0;Cluster-102008.2;Cluster-102361.0;Cluster-102361.1;Cluster-103157.0;Cluster-103157.1;Cluster-106407.0;Cluster-106407.2;Cluster-106407.4;Cluster-106407.5;Cluster-106929.0;Cluster-109046.0;Cluster-109046.1;Cluster-114443.1;Cluster-116336.0;Cluster-119084.1;Cluster-120162.385;Cluster-120162.388;Clus…	1433	Cluster-100532.2;Cluster-100532.3;Cluster-100532.6;Cluster-102361.0;Cluster-103157.1;Cluster-106407.5;Cluster-109046.0;Cluster-109046.1;Cluster-119084.1;Cluster-120162.385;Cluster-120162.388;Cluster-120162.389;Cluster-120162.393;Cluster-122938.0;Cluster-122938.4;Cluster-123989.4;Cluster-123989.6;Cluster-123989.8;Cluster-125526.0;Cluster-125526.2;Cluster-125526.4;Cluster-125645.1;Cluster-125645.10…	724	Cluster-100532.1;Cluster-100532.5;Cluster-100590.0;Cluster-102008.2;Cluster-102361.1;Cluster-103157.0;Cluster-106407.0;Cluster-106407.2;Cluster-106407.4;Cluster-106929.0;Cluster-114443.1;Cluster-116336.0;Cluster-120162.390;Cluster-120162.391;Cluster-120162.392;Cluster-120306.0;Cluster-122938.2;Cluster-122938.5;Cluster-125386.0;Cluster-125526.3;Cluster-125526.5;Cluster-125645.11;Cluster-125645.14;…	709	https:\\www.genome.jp\dbget-bin\www_bget?map03040
ko03010	Ribosome	1435/26245 5.46770813488283%	3050/60969 5.00254227558267%	2.69977e-06	0.000396866	Cluster-128216.0;Cluster-26278.2;Cluster-26278.8;Cluster-64666.2;Cluster-66799.0;Cluster-75124.0;Cluster-75124.1;Cluster-114321.0;Cluster-114321.1;Cluster-114321.2;Cluster-114321.7;Cluster-114321.8;Cluster-119886.0;Cluster-119886.1;Cluster-119886.2;Cluster-119886.3;Cluster-119886.4;Cluster-119886.5;Cluster-119886.6;Cluster-46069.0;Cluster-114718.2;Cluster-114810.11;Cluster-114810.2;Cluster-114810…	1435	Cluster-128216.0;Cluster-26278.2;Cluster-26278.8;Cluster-64666.2;Cluster-66799.0;Cluster-75124.1;Cluster-114321.7;Cluster-114321.8;Cluster-119886.0;Cluster-119886.1;Cluster-119886.2;Cluster-119886.5;Cluster-46069.0;Cluster-114810.11;Cluster-114810.3;Cluster-114810.7;Cluster-43410.0;Cluster-109283.1;Cluster-111416.0;Cluster-7727.14;Cluster-7727.4;Cluster-7727.5;Cluster-7727.8;Cluster-134755.1;Clus…	778	Cluster-75124.0;Cluster-114321.0;Cluster-114321.1;Cluster-114321.2;Cluster-119886.3;Cluster-119886.4;Cluster-119886.6;Cluster-114718.2;Cluster-114810.2;Cluster-114810.4;Cluster-114810.5;Cluster-114810.6;Cluster-114810.8;Cluster-120974.0;Cluster-109283.0;Cluster-111416.1;Cluster-111416.4;Cluster-134755.0;Cluster-134755.12;Cluster-134755.4;Cluster-134755.7;Cluster-134755.9;Cluster-126279.14;Cluster…	657	https:\\www.genome.jp\dbget-bin\www_bget?map03010
ko00943	Isoflavonoid biosynthesis	86/26245 0.327681463135835%	141/60969 0.231265069133494%	1.33621e-05	0.00196423	Cluster-102535.0;Cluster-103232.0;Cluster-103232.1;Cluster-103232.2;Cluster-103232.4;Cluster-103232.5;Cluster-108106.0;Cluster-108106.3;Cluster-119089.0;Cluster-119089.1;Cluster-119864.0;Cluster-119864.1;Cluster-119864.3;Cluster-119864.4;Cluster-119918.0;Cluster-119918.4;Cluster-119918.5;Cluster-33669.0;Cluster-42121.0;Cluster-46576.5;Cluster-46576.6;Cluster-46576.8;Cluster-56568.0;Cluster-63553.…	86	Cluster-102535.0;Cluster-103232.0;Cluster-103232.4;Cluster-108106.0;Cluster-119089.1;Cluster-119864.3;Cluster-119918.5;Cluster-33669.0;Cluster-42121.0;Cluster-46576.8;Cluster-56568.0;Cluster-63553.1;Cluster-63553.4;Cluster-82656.3;Cluster-108952.2;Cluster-135300.1;Cluster-135300.2;Cluster-135300.3;Cluster-3490.5;Cluster-110103.3;Cluster-116440.4;Cluster-116440.5;Cluster-128245.1;Cluster-128245.3;…	41	Cluster-103232.1;Cluster-103232.2;Cluster-103232.5;Cluster-108106.3;Cluster-119089.0;Cluster-119864.0;Cluster-119864.1;Cluster-119864.4;Cluster-119918.0;Cluster-119918.4;Cluster-46576.5;Cluster-46576.6;Cluster-63553.0;Cluster-63553.2;Cluster-88448.0;Cluster-108952.0;Cluster-108952.1;Cluster-135300.5;Cluster-3490.4;Cluster-43220.0;Cluster-83381.0;Cluster-86637.0;Cluster-97391.0;Cluster-98491.0;Clu…	45	https:\\www.genome.jp\dbget-bin\www_bget?map00943
ko03050	Proteasome	333/26245 1.26881310725853%	660/60969 1.08251734488019%	7.02297e-05	0.0103238	Cluster-120489.1;Cluster-120489.2;Cluster-131825.0;Cluster-131825.2;Cluster-131825.3;Cluster-131825.4;Cluster-131825.5;Cluster-131825.6;Cluster-131825.7;Cluster-131825.8;Cluster-131825.9;Cluster-45405.0;Cluster-115374.1;Cluster-115374.2;Cluster-115374.3;Cluster-45058.0;Cluster-40666.0;Cluster-95700.1;Cluster-95700.2;Cluster-95700.4;Cluster-95700.5;Cluster-45745.0;Cluster-59610.1;Cluster-59610.4;C…	333	Cluster-131825.2;Cluster-131825.5;Cluster-131825.6;Cluster-131825.7;Cluster-45405.0;Cluster-115374.2;Cluster-115374.3;Cluster-45058.0;Cluster-40666.0;Cluster-95700.2;Cluster-45745.0;Cluster-59610.1;Cluster-125632.2;Cluster-125632.3;Cluster-125632.7;Cluster-46476.0;Cluster-30248.0;Cluster-30248.1;Cluster-30248.4;Cluster-30248.6;Cluster-42564.0;Cluster-129577.1;Cluster-129577.2;Cluster-129577.3;Clu…	184	Cluster-120489.1;Cluster-120489.2;Cluster-131825.0;Cluster-131825.3;Cluster-131825.4;Cluster-131825.8;Cluster-131825.9;Cluster-115374.1;Cluster-95700.1;Cluster-95700.4;Cluster-95700.5;Cluster-59610.4;Cluster-59610.5;Cluster-99549.0;Cluster-125632.0;Cluster-125632.1;Cluster-125632.5;Cluster-66054.2;Cluster-114934.0;Cluster-114934.1;Cluster-118364.0;Cluster-30248.2;Cluster-30248.5;Cluster-30248.7;C…	149	https:\\www.genome.jp\dbget-bin\www_bget?map03050
ko00590	Arachidonic acid metabolism	103/26245 0.392455705848733%	186/60969 0.305073069920779%	0.00046991	0.0690767	Cluster-128419.0;Cluster-128419.3;Cluster-128419.4;Cluster-128419.5;Cluster-128419.6;Cluster-26574.20;Cluster-26574.22;Cluster-57595.0;Cluster-112465.0;Cluster-112465.2;Cluster-112465.3;Cluster-112465.4;Cluster-112465.5;Cluster-112465.6;Cluster-112465.7;Cluster-115094.0;Cluster-115094.1;Cluster-115094.2;Cluster-115094.3;Cluster-115094.7;Cluster-129460.0;Cluster-129460.2;Cluster-14853.39;Cluster-1…	103	Cluster-128419.4;Cluster-128419.5;Cluster-128419.6;Cluster-112465.0;Cluster-112465.2;Cluster-112465.3;Cluster-112465.6;Cluster-115094.0;Cluster-115094.1;Cluster-115094.7;Cluster-129460.0;Cluster-14853.39;Cluster-14853.40;Cluster-14853.42;Cluster-14853.44;Cluster-90353.3;Cluster-122874.2;Cluster-122874.3;Cluster-122874.5;Cluster-122874.7;Cluster-85382.0;Cluster-40817.0;Cluster-41989.0;Cluster-7418…	60	Cluster-128419.0;Cluster-128419.3;Cluster-26574.20;Cluster-26574.22;Cluster-57595.0;Cluster-112465.4;Cluster-112465.5;Cluster-112465.7;Cluster-115094.2;Cluster-115094.3;Cluster-129460.2;Cluster-90353.4;Cluster-122874.0;Cluster-122874.4;Cluster-85382.1;Cluster-85382.3;Cluster-74187.1;Cluster-9173.167;Cluster-20190.9;Cluster-29419.2;Cluster-109211.6;Cluster-115294.0;Cluster-115294.2;Cluster-126730.…	43	https:\\www.genome.jp\dbget-bin\www_bget?map00590
ko04144	Endocytosis	1014/26245 3.86359306534578%	2181/60969 3.57722777149043%	0.000519355	0.0763452	Cluster-104478.0;Cluster-107487.2;Cluster-128964.0;Cluster-128964.1;Cluster-45562.0;Cluster-74258.10;Cluster-74258.5;Cluster-74258.8;Cluster-74258.9;Cluster-78668.3;Cluster-78668.4;Cluster-78668.6;Cluster-103395.0;Cluster-104834.0;Cluster-104834.1;Cluster-104834.2;Cluster-104834.3;Cluster-104834.4;Cluster-110147.0;Cluster-121279.1;Cluster-121279.2;Cluster-121279.3;Cluster-121279.4;Cluster-121279.…	1014	Cluster-128964.0;Cluster-45562.0;Cluster-74258.5;Cluster-74258.8;Cluster-78668.4;Cluster-104834.0;Cluster-104834.2;Cluster-104834.3;Cluster-104834.4;Cluster-121279.2;Cluster-121279.4;Cluster-121279.5;Cluster-121279.6;Cluster-122359.3;Cluster-122359.4;Cluster-16883.8;Cluster-3214.0;Cluster-39806.0;Cluster-41695.0;Cluster-41857.0;Cluster-52330.1;Cluster-52330.4;Cluster-52330.5;Cluster-52330.9;Clust…	551	Cluster-104478.0;Cluster-107487.2;Cluster-128964.1;Cluster-74258.10;Cluster-74258.9;Cluster-78668.3;Cluster-78668.6;Cluster-103395.0;Cluster-104834.1;Cluster-110147.0;Cluster-121279.1;Cluster-121279.3;Cluster-122359.0;Cluster-122359.1;Cluster-52330.11;Cluster-52330.12;Cluster-52330.2;Cluster-59257.486;Cluster-59257.529;Cluster-66739.3;Cluster-66739.7;Cluster-68882.233;Cluster-86887.3;Cluster-8688…	463	https:\\www.genome.jp\dbget-bin\www_bget?map04144
ko04120	Ubiquitin mediated proteolysis	882/26245 3.36064012192799%	1887/60969 3.09501549968017%	0.000556425	0.0817945	Cluster-116807.0;Cluster-116807.1;Cluster-116807.3;Cluster-26303.1;Cluster-26303.4;Cluster-39748.0;Cluster-44991.0;Cluster-47589.143;Cluster-47589.145;Cluster-47589.147;Cluster-47589.175;Cluster-47589.183;Cluster-47589.203;Cluster-47589.204;Cluster-47589.205;Cluster-47589.230;Cluster-47589.231;Cluster-47589.232;Cluster-47589.233;Cluster-47589.234;Cluster-47589.239;Cluster-47589.259;Cluster-47589.…	882	Cluster-26303.1;Cluster-26303.4;Cluster-39748.0;Cluster-44991.0;Cluster-47589.147;Cluster-47589.183;Cluster-47589.205;Cluster-47589.231;Cluster-47589.234;Cluster-47589.239;Cluster-47589.261;Cluster-47589.74;Cluster-47589.76;Cluster-47589.84;Cluster-47589.95;Cluster-54243.836;Cluster-54243.840;Cluster-54243.841;Cluster-55160.0;Cluster-73750.3;Cluster-94154.0;Cluster-2942.0;Cluster-41946.0;Cluster-…	447	Cluster-116807.0;Cluster-116807.1;Cluster-116807.3;Cluster-47589.143;Cluster-47589.145;Cluster-47589.175;Cluster-47589.203;Cluster-47589.204;Cluster-47589.230;Cluster-47589.232;Cluster-47589.233;Cluster-47589.259;Cluster-47589.75;Cluster-47589.83;Cluster-62101.1;Cluster-6536.35;Cluster-6536.36;Cluster-74643.3;Cluster-80944.0;Cluster-84186.0;Cluster-47589.155;Cluster-47589.156;Cluster-47589.159;Cl…	435	https:\\www.genome.jp\dbget-bin\www_bget?map04120
ko00600	Sphingolipid metabolism	344/26245 1.31072585254334%	710/60969 1.16452623464384%	0.00200674	0.294991	Cluster-115720.1;Cluster-115720.3;Cluster-115720.4;Cluster-115720.6;Cluster-115720.7;Cluster-117732.1;Cluster-117732.10;Cluster-117732.11;Cluster-117732.13;Cluster-117732.15;Cluster-117732.16;Cluster-117732.2;Cluster-117732.6;Cluster-117732.7;Cluster-117732.8;Cluster-117732.9;Cluster-31669.0;Cluster-37530.28;Cluster-72547.0;Cluster-121850.0;Cluster-121850.1;Cluster-121850.2;Cluster-121850.3;Clust…	344	Cluster-115720.6;Cluster-115720.7;Cluster-117732.10;Cluster-117732.15;Cluster-117732.16;Cluster-117732.2;Cluster-117732.6;Cluster-31669.0;Cluster-37530.28;Cluster-121850.0;Cluster-121850.1;Cluster-135212.10;Cluster-135212.2;Cluster-135212.5;Cluster-135212.7;Cluster-135212.9;Cluster-45280.0;Cluster-119198.1;Cluster-119198.2;Cluster-124517.14;Cluster-2994.0;Cluster-38080.1;Cluster-94773.5;Cluster-1…	181	Cluster-115720.1;Cluster-115720.3;Cluster-115720.4;Cluster-117732.1;Cluster-117732.11;Cluster-117732.13;Cluster-117732.7;Cluster-117732.8;Cluster-117732.9;Cluster-72547.0;Cluster-121850.2;Cluster-121850.3;Cluster-121850.4;Cluster-121850.5;Cluster-135212.0;Cluster-135212.3;Cluster-135212.8;Cluster-117194.0;Cluster-119198.0;Cluster-120831.0;Cluster-124517.12;Cluster-124517.3;Cluster-124517.6;Cluste…	163	https:\\www.genome.jp\dbget-bin\www_bget?map00600
ko00902	Monoterpenoid biosynthesis	37/26245 0.140979234139836%	60/60969 0.0984106677163805%	0.00280777	0.412742	Cluster-108395.0;Cluster-111417.0;Cluster-111417.1;Cluster-111417.3;Cluster-116119.0;Cluster-116119.1;Cluster-116119.10;Cluster-116119.3;Cluster-116119.4;Cluster-116119.5;Cluster-116119.6;Cluster-116119.7;Cluster-116119.8;Cluster-116119.9;Cluster-131558.3;Cluster-131558.7;Cluster-131558.8;Cluster-133671.0;Cluster-133671.1;Cluster-133671.3;Cluster-133671.4;Cluster-133671.6;Cluster-133671.7;Cluster…	37	Cluster-108395.0;Cluster-111417.0;Cluster-111417.1;Cluster-116119.0;Cluster-116119.4;Cluster-116119.5;Cluster-116119.7;Cluster-116119.9;Cluster-131558.8;Cluster-133671.1;Cluster-133671.3;Cluster-133671.6;Cluster-133671.7;Cluster-87556.0;Cluster-4324.1;Cluster-133750.1;Cluster-133750.9;Cluster-31687.0	18	Cluster-111417.3;Cluster-116119.1;Cluster-116119.10;Cluster-116119.3;Cluster-116119.6;Cluster-116119.8;Cluster-131558.3;Cluster-131558.7;Cluster-133671.0;Cluster-133671.4;Cluster-117863.0;Cluster-117863.1;Cluster-49251.1;Cluster-4324.2;Cluster-4324.4;Cluster-111484.0;Cluster-133750.5;Cluster-133750.6;Cluster-65129.0	19	https:\\www.genome.jp\dbget-bin\www_bget?map00902
ko00945	Stilbenoid, diarylheptanoid and gingerol biosynthesis	111/26245 0.422937702419508%	211/60969 0.346077514802605%	0.00320356	0.470923	Cluster-105312.0;Cluster-105312.1;Cluster-105312.2;Cluster-105557.0;Cluster-105557.1;Cluster-105557.2;Cluster-105557.3;Cluster-105557.4;Cluster-126385.0;Cluster-102941.0;Cluster-40542.0;Cluster-45797.0;Cluster-45797.1;Cluster-45797.2;Cluster-45797.3;Cluster-45797.5;Cluster-97920.0;Cluster-97920.1;Cluster-105403.0;Cluster-105403.1;Cluster-10371.11;Cluster-110342.1;Cluster-110342.4;Cluster-110342.5…	111	Cluster-105312.1;Cluster-105312.2;Cluster-40542.0;Cluster-45797.0;Cluster-45797.1;Cluster-45797.2;Cluster-45797.3;Cluster-45797.5;Cluster-97920.1;Cluster-105403.0;Cluster-110342.1;Cluster-110342.6;Cluster-116017.2;Cluster-116017.3;Cluster-116490.1;Cluster-124281.1;Cluster-130178.1;Cluster-130178.3;Cluster-132482.4;Cluster-132832.0;Cluster-133313.0;Cluster-28117.0;Cluster-41812.0;Cluster-43284.0;C…	56	Cluster-105312.0;Cluster-105557.0;Cluster-105557.1;Cluster-105557.2;Cluster-105557.3;Cluster-105557.4;Cluster-126385.0;Cluster-102941.0;Cluster-97920.0;Cluster-105403.1;Cluster-10371.11;Cluster-110342.4;Cluster-110342.5;Cluster-110342.7;Cluster-116017.0;Cluster-116017.1;Cluster-116490.0;Cluster-124746.5;Cluster-128245.2;Cluster-130178.4;Cluster-130178.5;Cluster-133929.0;Cluster-43529.3;Cluster-43…	55	https:\\www.genome.jp\dbget-bin\www_bget?map00945
ko00999	Biosynthesis of various plant secondary metabolites	313/26245 1.19260811583159%	650/60969 1.06611556692745%	0.00472051	0.693915	Cluster-115884.0;Cluster-115999.0;Cluster-115999.1;Cluster-115999.2;Cluster-115999.5;Cluster-115999.7;Cluster-121036.1;Cluster-121036.2;Cluster-130243.0;Cluster-130243.2;Cluster-130243.3;Cluster-130243.5;Cluster-42313.0;Cluster-64437.0;Cluster-87401.0;Cluster-87401.1;Cluster-87401.11;Cluster-87401.12;Cluster-87401.14;Cluster-87401.15;Cluster-87401.16;Cluster-87401.17;Cluster-87401.19;Cluster-8740…	313	Cluster-115999.2;Cluster-130243.0;Cluster-42313.0;Cluster-87401.0;Cluster-87401.11;Cluster-87401.12;Cluster-87401.14;Cluster-87401.17;Cluster-87401.24;Cluster-87401.28;Cluster-87401.31;Cluster-87401.34;Cluster-87401.35;Cluster-87401.4;Cluster-87401.5;Cluster-87401.6;Cluster-101402.2;Cluster-106355.0;Cluster-108272.0;Cluster-109251.4;Cluster-111006.3;Cluster-112367.1;Cluster-122599.8;Cluster-12306…	153	Cluster-115884.0;Cluster-115999.0;Cluster-115999.1;Cluster-115999.5;Cluster-115999.7;Cluster-121036.1;Cluster-121036.2;Cluster-130243.2;Cluster-130243.3;Cluster-130243.5;Cluster-64437.0;Cluster-87401.1;Cluster-87401.15;Cluster-87401.16;Cluster-87401.19;Cluster-87401.2;Cluster-87401.20;Cluster-87401.22;Cluster-87401.23;Cluster-87401.30;Cluster-87401.8;Cluster-98558.0;Cluster-101402.0;Cluster-10140…	160	https:\\www.genome.jp\dbget-bin\www_bget?map00999
ko00240	Pyrimidine metabolism	317/26245 1.20784911411697%	660/60969 1.08251734488019%	0.00535014	0.78647	Cluster-101892.1;Cluster-51991.1;Cluster-81090.1;Cluster-22897.11;Cluster-22897.12;Cluster-22897.4;Cluster-22897.7;Cluster-22897.8;Cluster-22897.9;Cluster-2490.0;Cluster-41773.0;Cluster-44187.0;Cluster-46396.0;Cluster-111165.0;Cluster-114668.1;Cluster-95719.6;Cluster-110523.0;Cluster-110523.2;Cluster-110523.3;Cluster-110523.4;Cluster-120660.4;Cluster-122239.0;Cluster-122239.4;Cluster-128601.1;Clu…	317	Cluster-101892.1;Cluster-22897.11;Cluster-22897.9;Cluster-2490.0;Cluster-41773.0;Cluster-44187.0;Cluster-46396.0;Cluster-95719.6;Cluster-110523.0;Cluster-110523.3;Cluster-110523.4;Cluster-122239.0;Cluster-128601.1;Cluster-128601.6;Cluster-131562.2;Cluster-131562.4;Cluster-131562.5;Cluster-37484.0;Cluster-38936.2;Cluster-110954.2;Cluster-120345.0;Cluster-120345.3;Cluster-129032.0;Cluster-129032.1;…	157	Cluster-51991.1;Cluster-81090.1;Cluster-22897.12;Cluster-22897.4;Cluster-22897.7;Cluster-22897.8;Cluster-111165.0;Cluster-114668.1;Cluster-110523.2;Cluster-120660.4;Cluster-122239.4;Cluster-128601.3;Cluster-128601.5;Cluster-38936.6;Cluster-9198.1;Cluster-110954.3;Cluster-110954.4;Cluster-120345.1;Cluster-120345.2;Cluster-120345.4;Cluster-120345.5;Cluster-129032.2;Cluster-129032.3;Cluster-129032.5…	160	https:\\www.genome.jp\dbget-bin\www_bget?map00240
ko00592	alpha-Linolenic acid metabolism	262/26245 0.998285387692894%	541/60969 0.887336187242697%	0.00642782	0.94489	Cluster-127575.0;Cluster-127575.1;Cluster-127575.2;Cluster-43389.0;Cluster-45284.0;Cluster-89347.1;Cluster-89347.2;Cluster-89347.3;Cluster-89347.4;Cluster-89347.5;Cluster-89347.7;Cluster-117284.0;Cluster-117284.1;Cluster-117284.4;Cluster-120522.0;Cluster-120522.1;Cluster-120522.4;Cluster-120522.5;Cluster-120522.7;Cluster-120522.8;Cluster-127187.1;Cluster-127187.2;Cluster-127187.3;Cluster-127187.5…	262	Cluster-127575.2;Cluster-43389.0;Cluster-45284.0;Cluster-89347.3;Cluster-89347.5;Cluster-89347.7;Cluster-117284.0;Cluster-117284.4;Cluster-120522.0;Cluster-120522.5;Cluster-127187.2;Cluster-127187.3;Cluster-131596.3;Cluster-39022.0;Cluster-42370.0;Cluster-127556.0;Cluster-130225.1;Cluster-130225.2;Cluster-130225.5;Cluster-34769.0;Cluster-34769.17;Cluster-56289.0;Cluster-56289.11;Cluster-56289.4;C…	138	Cluster-127575.0;Cluster-127575.1;Cluster-89347.1;Cluster-89347.2;Cluster-89347.4;Cluster-117284.1;Cluster-120522.1;Cluster-120522.4;Cluster-120522.7;Cluster-120522.8;Cluster-127187.1;Cluster-127187.5;Cluster-131596.0;Cluster-131596.1;Cluster-104473.1;Cluster-104473.2;Cluster-104473.3;Cluster-130225.4;Cluster-34769.1;Cluster-56289.1;Cluster-68263.5;Cluster-122874.0;Cluster-122874.4;Cluster-85382.…	124	https:\\www.genome.jp\dbget-bin\www_bget?map00592
ko00402	Benzoxazinoid biosynthesis	16/26245 0.0609639931415508%	24/60969 0.0393642670865522%	0.016852	1	Cluster-82833.0;Cluster-52886.1;Cluster-52886.2;Cluster-66218.0;Cluster-66218.10;Cluster-66218.11;Cluster-66218.12;Cluster-66218.15;Cluster-66218.16;Cluster-66218.18;Cluster-66218.19;Cluster-66218.5;Cluster-66218.6;Cluster-66218.7;Cluster-66218.8;Cluster-97591.0	16	Cluster-82833.0;Cluster-66218.10;Cluster-66218.11;Cluster-66218.8	4	Cluster-52886.1;Cluster-52886.2;Cluster-66218.0;Cluster-66218.12;Cluster-66218.15;Cluster-66218.16;Cluster-66218.18;Cluster-66218.19;Cluster-66218.5;Cluster-66218.6;Cluster-66218.7;Cluster-97591.0	12	https:\\www.genome.jp\dbget-bin\www_bget?map00402
ko00750	Vitamin B6 metabolism	54/26245 0.205753476852734%	101/60969 0.165657957322574%	0.0223809	1	Cluster-97506.0;Cluster-111953.0;Cluster-115769.0;Cluster-115769.1;Cluster-115769.2;Cluster-115769.4;Cluster-115769.5;Cluster-20857.0;Cluster-57271.0;Cluster-61456.1;Cluster-91534.3;Cluster-98170.0;Cluster-98170.3;Cluster-98170.4;Cluster-98170.5;Cluster-98170.6;Cluster-98170.7;Cluster-122732.0;Cluster-122732.1;Cluster-122732.3;Cluster-122732.4;Cluster-122732.5;Cluster-122732.6;Cluster-102588.0;Cl…	54	Cluster-115769.0;Cluster-115769.4;Cluster-115769.5;Cluster-20857.0;Cluster-57271.0;Cluster-91534.3;Cluster-98170.0;Cluster-98170.3;Cluster-98170.5;Cluster-122732.0;Cluster-122732.5;Cluster-11297.6;Cluster-11297.7;Cluster-116451.5;Cluster-35272.0;Cluster-122204.1;Cluster-131757.0;Cluster-62378.0;Cluster-96869.0;Cluster-123399.6;Cluster-46738.0;Cluster-6122.12;Cluster-134389.5;Cluster-45485.2;Clust…	27	Cluster-97506.0;Cluster-111953.0;Cluster-115769.1;Cluster-115769.2;Cluster-61456.1;Cluster-98170.4;Cluster-98170.6;Cluster-98170.7;Cluster-122732.1;Cluster-122732.3;Cluster-122732.4;Cluster-122732.6;Cluster-102588.0;Cluster-116451.0;Cluster-116451.2;Cluster-122204.7;Cluster-122204.8;Cluster-123399.0;Cluster-123399.1;Cluster-123399.3;Cluster-123399.4;Cluster-125713.2;Cluster-6122.11;Cluster-45485.…	27	https:\\www.genome.jp\dbget-bin\www_bget?map00750
ko03008	Ribosome biogenesis in eukaryotes	689/26245 2.62526195465803%	1511/60969 2.47830864865751%	0.0227669	1	Cluster-16867.6;Cluster-16867.7;Cluster-16867.9;Cluster-22805.0;Cluster-48228.2;Cluster-48228.5;Cluster-48228.6;Cluster-79212.0;Cluster-79212.2;Cluster-79212.4;Cluster-101411.0;Cluster-103129.0;Cluster-109447.0;Cluster-109447.1;Cluster-109447.2;Cluster-113311.0;Cluster-113311.1;Cluster-113311.2;Cluster-113311.3;Cluster-122746.0;Cluster-122746.1;Cluster-122746.2;Cluster-122746.4;Cluster-126914.3;C…	689	Cluster-16867.7;Cluster-16867.9;Cluster-22805.0;Cluster-48228.2;Cluster-48228.6;Cluster-79212.0;Cluster-101411.0;Cluster-109447.2;Cluster-113311.0;Cluster-122746.1;Cluster-122746.2;Cluster-122746.4;Cluster-126914.4;Cluster-126914.5;Cluster-18799.7;Cluster-35586.14;Cluster-35586.18;Cluster-35586.19;Cluster-35586.21;Cluster-44759.0;Cluster-100117.2;Cluster-121297.2;Cluster-121297.4;Cluster-121297.7…	340	Cluster-16867.6;Cluster-48228.5;Cluster-79212.2;Cluster-79212.4;Cluster-103129.0;Cluster-109447.0;Cluster-109447.1;Cluster-113311.1;Cluster-113311.2;Cluster-113311.3;Cluster-122746.0;Cluster-126914.3;Cluster-35586.13;Cluster-35586.20;Cluster-35586.22;Cluster-35586.4;Cluster-35586.5;Cluster-35586.6;Cluster-35586.9;Cluster-121297.0;Cluster-121297.5;Cluster-121297.9;Cluster-132442.1;Cluster-132442.6…	349	https:\\www.genome.jp\dbget-bin\www_bget?map03008
ko03250	Viral life cycle - HIV-1	220/26245 0.838254905696323%	461/60969 0.756121963620856%	0.0236924	1	Cluster-17211.21;Cluster-66810.35;Cluster-79095.13;Cluster-79095.14;Cluster-79095.15;Cluster-79095.17;Cluster-79095.19;Cluster-8626.94;Cluster-8626.96;Cluster-92002.0;Cluster-92002.1;Cluster-92002.10;Cluster-92002.2;Cluster-92002.3;Cluster-92002.4;Cluster-92002.6;Cluster-92002.7;Cluster-92002.8;Cluster-92002.9;Cluster-114491.0;Cluster-114491.1;Cluster-114491.2;Cluster-114491.4;Cluster-114491.6;Cl…	220	Cluster-79095.13;Cluster-79095.15;Cluster-8626.94;Cluster-8626.96;Cluster-92002.1;Cluster-92002.3;Cluster-92002.4;Cluster-92002.6;Cluster-114491.2;Cluster-114491.4;Cluster-114491.9;Cluster-41852.0;Cluster-23255.10;Cluster-23255.2;Cluster-23255.4;Cluster-23255.7;Cluster-34661.10;Cluster-34661.15;Cluster-34661.19;Cluster-34661.22;Cluster-34661.26;Cluster-35043.1;Cluster-35043.6;Cluster-42734.0;Clus…	118	Cluster-17211.21;Cluster-66810.35;Cluster-79095.14;Cluster-79095.17;Cluster-79095.19;Cluster-92002.0;Cluster-92002.10;Cluster-92002.2;Cluster-92002.7;Cluster-92002.8;Cluster-92002.9;Cluster-114491.0;Cluster-114491.1;Cluster-114491.6;Cluster-108665.0;Cluster-23255.11;Cluster-23255.12;Cluster-23255.5;Cluster-34661.11;Cluster-34661.12;Cluster-34661.18;Cluster-34661.25;Cluster-34661.28;Cluster-101012…	102	https:\\www.genome.jp\dbget-bin\www_bget?map03250
ko04122	Sulfur relay system	42/26245 0.160030481996571%	77/60969 0.126293690236022%	0.0277234	1	Cluster-65275.1;Cluster-65275.4;Cluster-65275.5;Cluster-65275.7;Cluster-65275.8;Cluster-101710.0;Cluster-101710.1;Cluster-58306.10;Cluster-58306.4;Cluster-58306.5;Cluster-58306.6;Cluster-58306.7;Cluster-58306.8;Cluster-129425.0;Cluster-129425.1;Cluster-129425.3;Cluster-129425.4;Cluster-129425.7;Cluster-105069.10;Cluster-105069.13;Cluster-105069.4;Cluster-105069.6;Cluster-105069.7;Cluster-105069.8…	42	Cluster-65275.7;Cluster-101710.0;Cluster-58306.10;Cluster-58306.6;Cluster-58306.8;Cluster-129425.0;Cluster-129425.1;Cluster-129425.7;Cluster-105069.10;Cluster-105069.13;Cluster-105069.7;Cluster-105069.9;Cluster-23479.1;Cluster-106179.0;Cluster-106179.2;Cluster-106179.5;Cluster-18122.120;Cluster-18122.134;Cluster-91178.3;Cluster-91178.4;Cluster-108550.1;Cluster-108550.2;Cluster-108550.4	23	Cluster-65275.1;Cluster-65275.4;Cluster-65275.5;Cluster-65275.8;Cluster-101710.1;Cluster-58306.4;Cluster-58306.5;Cluster-58306.7;Cluster-129425.3;Cluster-129425.4;Cluster-105069.4;Cluster-105069.6;Cluster-105069.8;Cluster-106179.1;Cluster-106179.3;Cluster-18122.143;Cluster-90421.0;Cluster-91178.1;Cluster-108550.3	19	https:\\www.genome.jp\dbget-bin\www_bget?map04122
ko03022	Basal transcription factors	191/26245 0.727757668127262%	399/60969 0.65443094031393%	0.0289492	1	Cluster-129567.1;Cluster-129567.2;Cluster-129567.4;Cluster-129567.5;Cluster-129567.6;Cluster-131541.0;Cluster-131541.1;Cluster-131541.2;Cluster-131541.3;Cluster-131541.5;Cluster-131541.6;Cluster-131541.8;Cluster-131541.9;Cluster-134124.0;Cluster-134124.1;Cluster-134124.3;Cluster-134124.4;Cluster-134124.6;Cluster-134124.7;Cluster-43965.0;Cluster-48144.4;Cluster-48144.7;Cluster-110937.2;Cluster-110…	191	Cluster-129567.1;Cluster-129567.2;Cluster-129567.4;Cluster-131541.5;Cluster-131541.6;Cluster-131541.8;Cluster-134124.4;Cluster-134124.6;Cluster-134124.7;Cluster-43965.0;Cluster-48144.7;Cluster-110937.3;Cluster-126824.2;Cluster-130975.3;Cluster-130975.4;Cluster-40215.0;Cluster-50496.6;Cluster-64579.4;Cluster-68384.1;Cluster-68384.2;Cluster-68384.4;Cluster-110450.1;Cluster-102327.1;Cluster-124072.1…	101	Cluster-129567.5;Cluster-129567.6;Cluster-131541.0;Cluster-131541.1;Cluster-131541.2;Cluster-131541.3;Cluster-131541.9;Cluster-134124.0;Cluster-134124.1;Cluster-134124.3;Cluster-48144.4;Cluster-110937.2;Cluster-126824.1;Cluster-126824.4;Cluster-129264.0;Cluster-130975.0;Cluster-130975.1;Cluster-130975.2;Cluster-130975.7;Cluster-50496.11;Cluster-50496.12;Cluster-50496.4;Cluster-50496.8;Cluster-645…	90	https:\\www.genome.jp\dbget-bin\www_bget?map03022
ko00965	Betalain biosynthesis	35/26245 0.133358734997142%	63/60969 0.103331201102199%	0.030708	1	Cluster-108327.0;Cluster-108327.1;Cluster-108327.2;Cluster-108327.3;Cluster-120404.1;Cluster-120404.5;Cluster-120404.7;Cluster-126142.0;Cluster-126142.2;Cluster-126142.4;Cluster-127946.0;Cluster-131592.0;Cluster-131592.5;Cluster-45175.0;Cluster-59874.0;Cluster-59874.1;Cluster-59874.3;Cluster-59874.4;Cluster-59874.6;Cluster-59874.8;Cluster-65621.3;Cluster-132706.1;Cluster-132706.2;Cluster-132706.5…	35	Cluster-108327.0;Cluster-108327.1;Cluster-108327.2;Cluster-120404.1;Cluster-120404.7;Cluster-126142.2;Cluster-126142.4;Cluster-131592.0;Cluster-131592.5;Cluster-45175.0;Cluster-59874.0;Cluster-59874.3;Cluster-59874.4;Cluster-59874.8;Cluster-65621.3;Cluster-132706.1;Cluster-132706.2;Cluster-132706.5;Cluster-132706.7;Cluster-134380.0;Cluster-134380.2;Cluster-134380.6;Cluster-29105.0;Cluster-29105.1	24	Cluster-108327.3;Cluster-120404.5;Cluster-126142.0;Cluster-127946.0;Cluster-59874.1;Cluster-59874.6;Cluster-132706.8;Cluster-134380.3;Cluster-134380.4;Cluster-134380.5;Cluster-62610.0	11	https:\\www.genome.jp\dbget-bin\www_bget?map00965
ko00901	Indole alkaloid biosynthesis	31/26245 0.118117736711755%	55/60969 0.0902097787400154%	0.0320953	1	Cluster-108327.0;Cluster-108327.1;Cluster-108327.2;Cluster-108327.3;Cluster-120404.1;Cluster-120404.5;Cluster-120404.7;Cluster-126142.0;Cluster-126142.2;Cluster-126142.4;Cluster-127946.0;Cluster-131592.0;Cluster-131592.5;Cluster-45175.0;Cluster-59874.0;Cluster-59874.1;Cluster-59874.3;Cluster-59874.4;Cluster-59874.6;Cluster-59874.8;Cluster-65621.3;Cluster-107064.0;Cluster-107064.1;Cluster-107064.3…	31	Cluster-108327.0;Cluster-108327.1;Cluster-108327.2;Cluster-120404.1;Cluster-120404.7;Cluster-126142.2;Cluster-126142.4;Cluster-131592.0;Cluster-131592.5;Cluster-45175.0;Cluster-59874.0;Cluster-59874.3;Cluster-59874.4;Cluster-59874.8;Cluster-65621.3;Cluster-107064.3;Cluster-131062.2;Cluster-43707.0;Cluster-94745.0;Cluster-96688.1	20	Cluster-108327.3;Cluster-120404.5;Cluster-126142.0;Cluster-127946.0;Cluster-59874.1;Cluster-59874.6;Cluster-107064.0;Cluster-107064.1;Cluster-131062.0;Cluster-94745.1;Cluster-96688.0	11	https:\\www.genome.jp\dbget-bin\www_bget?map00901
ko00515	Mannose type O-glycan biosynthesis	12/26245 0.0457229948561631%	18/60969 0.0295232003149141%	0.03755	1	Cluster-34046.0;Cluster-40856.0;Cluster-41238.0;Cluster-42580.0;Cluster-89480.10;Cluster-89480.3;Cluster-89480.4;Cluster-89480.5;Cluster-89480.6;Cluster-89480.7;Cluster-89480.9;Cluster-46070.0	12	Cluster-34046.0;Cluster-40856.0;Cluster-41238.0;Cluster-42580.0;Cluster-89480.5;Cluster-89480.6;Cluster-89480.7;Cluster-89480.9;Cluster-46070.0	9	Cluster-89480.10;Cluster-89480.3;Cluster-89480.4	3	https:\\www.genome.jp\dbget-bin\www_bget?map00515
ko00903	Limonene and pinene degradation	65/26245 0.24766622213755%	127/60969 0.208302579999672%	0.0394193	1	Cluster-113514.0;Cluster-113514.2;Cluster-126911.0;Cluster-129794.0;Cluster-129794.11;Cluster-129794.12;Cluster-129794.13;Cluster-129794.14;Cluster-129794.17;Cluster-129794.18;Cluster-129794.19;Cluster-129794.2;Cluster-129794.3;Cluster-129794.4;Cluster-129794.5;Cluster-129794.8;Cluster-129794.9;Cluster-133601.0;Cluster-133601.1;Cluster-133601.2;Cluster-133601.6;Cluster-133601.7;Cluster-134234.2;C…	65	Cluster-129794.17;Cluster-129794.19;Cluster-129794.3;Cluster-129794.5;Cluster-133601.0;Cluster-133601.2;Cluster-134234.2;Cluster-134234.3;Cluster-134234.5;Cluster-134234.8;Cluster-134234.9;Cluster-31268.1;Cluster-40738.0;Cluster-44167.0;Cluster-44932.0;Cluster-49645.11;Cluster-49645.13;Cluster-49645.15;Cluster-49645.18;Cluster-49645.2;Cluster-49645.20;Cluster-49645.22;Cluster-129073.0;Cluster-129…	32	Cluster-113514.0;Cluster-113514.2;Cluster-126911.0;Cluster-129794.0;Cluster-129794.11;Cluster-129794.12;Cluster-129794.13;Cluster-129794.14;Cluster-129794.18;Cluster-129794.2;Cluster-129794.4;Cluster-129794.8;Cluster-129794.9;Cluster-133601.1;Cluster-133601.6;Cluster-133601.7;Cluster-134234.4;Cluster-134234.6;Cluster-135510.0;Cluster-19726.11;Cluster-19726.17;Cluster-19726.19;Cluster-19726.5;Clus…	33	https:\\www.genome.jp\dbget-bin\www_bget?map00903
ko00950	Isoquinoline alkaloid biosynthesis	140/26245 0.533434939988569%	290/60969 0.475651560629172%	0.0410263	1	Cluster-105362.0;Cluster-105362.1;Cluster-105362.2;Cluster-118220.0;Cluster-118220.1;Cluster-118220.2;Cluster-118220.3;Cluster-118220.4;Cluster-118220.5;Cluster-118220.7;Cluster-125743.0;Cluster-125743.1;Cluster-125743.2;Cluster-125743.3;Cluster-125743.4;Cluster-125743.5;Cluster-125743.6;Cluster-125743.7;Cluster-125743.8;Cluster-35952.2;Cluster-35952.3;Cluster-35952.4;Cluster-35952.6;Cluster-3595…	140	Cluster-105362.1;Cluster-118220.0;Cluster-118220.1;Cluster-118220.2;Cluster-118220.5;Cluster-118220.7;Cluster-125743.0;Cluster-125743.1;Cluster-35952.2;Cluster-35952.4;Cluster-35952.6;Cluster-80905.1;Cluster-122928.0;Cluster-112077.3;Cluster-112077.4;Cluster-112843.0;Cluster-119152.3;Cluster-119430.1;Cluster-41421.0;Cluster-45454.0;Cluster-45454.2;Cluster-45454.4;Cluster-45454.5;Cluster-45454.7;C…	72	Cluster-105362.0;Cluster-105362.2;Cluster-118220.3;Cluster-118220.4;Cluster-125743.2;Cluster-125743.3;Cluster-125743.4;Cluster-125743.5;Cluster-125743.6;Cluster-125743.7;Cluster-125743.8;Cluster-35952.3;Cluster-35952.7;Cluster-97597.0;Cluster-112077.5;Cluster-112077.6;Cluster-101214.1;Cluster-112843.1;Cluster-112843.3;Cluster-112843.4;Cluster-112843.5;Cluster-118955.0;Cluster-119152.2;Cluster-119…	68	https:\\www.genome.jp\dbget-bin\www_bget?map00950
ko00603	Glycosphingolipid biosynthesis - globo and isoglobo series	33/26245 0.125738235854448%	60/60969 0.0984106677163805%	0.041525	1	Cluster-46642.0;Cluster-100720.0;Cluster-102656.1;Cluster-102656.3;Cluster-103846.1;Cluster-103846.2;Cluster-103846.4;Cluster-103846.5;Cluster-103846.7;Cluster-103846.9;Cluster-3789.0;Cluster-55585.2;Cluster-55585.3;Cluster-98769.12;Cluster-98769.13;Cluster-98769.14;Cluster-102762.0;Cluster-102762.1;Cluster-102762.2;Cluster-102762.3;Cluster-109626.0;Cluster-109626.1;Cluster-110948.0;Cluster-11094…	33	Cluster-46642.0;Cluster-100720.0;Cluster-103846.2;Cluster-103846.4;Cluster-103846.7;Cluster-103846.9;Cluster-3789.0;Cluster-55585.3;Cluster-98769.12;Cluster-98769.13;Cluster-98769.14;Cluster-102762.0;Cluster-102762.2;Cluster-102762.3;Cluster-109626.0;Cluster-110948.0;Cluster-110948.2;Cluster-110948.5;Cluster-110948.8;Cluster-110948.9;Cluster-39542.0;Cluster-44232.0;Cluster-44239.1	23	Cluster-102656.1;Cluster-102656.3;Cluster-103846.1;Cluster-103846.5;Cluster-55585.2;Cluster-102762.1;Cluster-109626.1;Cluster-110948.1;Cluster-110948.4;Cluster-44239.0	10	https:\\www.genome.jp\dbget-bin\www_bget?map00603
ko00220	Arginine biosynthesis	143/26245 0.54486568870261%	297/60969 0.487132805196083%	0.0429922	1	Cluster-25446.56;Cluster-94651.7;Cluster-58525.0;Cluster-58525.2;Cluster-58525.3;Cluster-58525.5;Cluster-58525.6;Cluster-58525.9;Cluster-77630.1;Cluster-95193.10;Cluster-95193.11;Cluster-95193.12;Cluster-95193.4;Cluster-95193.7;Cluster-95193.8;Cluster-95193.9;Cluster-118534.1;Cluster-118534.2;Cluster-118534.3;Cluster-118534.4;Cluster-95490.0;Cluster-95490.1;Cluster-128347.11;Cluster-128347.2;Clus…	143	Cluster-58525.0;Cluster-58525.2;Cluster-58525.3;Cluster-58525.5;Cluster-95193.11;Cluster-95193.4;Cluster-118534.2;Cluster-118534.3;Cluster-95490.0;Cluster-128347.11;Cluster-128347.2;Cluster-128347.5;Cluster-128347.9;Cluster-112077.3;Cluster-112077.4;Cluster-127294.3;Cluster-127294.5;Cluster-5680.3;Cluster-86883.6;Cluster-135426.1;Cluster-135426.11;Cluster-135426.2;Cluster-135426.5;Cluster-17962.0…	71	Cluster-25446.56;Cluster-94651.7;Cluster-58525.6;Cluster-58525.9;Cluster-77630.1;Cluster-95193.10;Cluster-95193.12;Cluster-95193.7;Cluster-95193.8;Cluster-95193.9;Cluster-118534.1;Cluster-118534.4;Cluster-95490.1;Cluster-128347.3;Cluster-112077.5;Cluster-112077.6;Cluster-127294.1;Cluster-127294.4;Cluster-127294.6;Cluster-135426.0;Cluster-135426.12;Cluster-135426.4;Cluster-133013.2;Cluster-133013.…	72	https:\\www.genome.jp\dbget-bin\www_bget?map00220
ko04070	Phosphatidylinositol signaling system	354/26245 1.34882834825681%	767/60969 1.2580163689744%	0.0436731	1	Cluster-41223.0;Cluster-43432.0;Cluster-55023.1;Cluster-55023.2;Cluster-55023.3;Cluster-55023.4;Cluster-55023.5;Cluster-104478.0;Cluster-107487.2;Cluster-128964.0;Cluster-128964.1;Cluster-45562.0;Cluster-74258.10;Cluster-74258.5;Cluster-74258.8;Cluster-74258.9;Cluster-78668.3;Cluster-78668.4;Cluster-78668.6;Cluster-110158.0;Cluster-110158.4;Cluster-110158.5;Cluster-112565.0;Cluster-112847.0;Clust…	354	Cluster-41223.0;Cluster-43432.0;Cluster-55023.4;Cluster-55023.5;Cluster-128964.0;Cluster-45562.0;Cluster-74258.5;Cluster-74258.8;Cluster-78668.4;Cluster-110158.5;Cluster-112847.2;Cluster-116306.0;Cluster-116306.4;Cluster-118802.3;Cluster-118802.5;Cluster-118802.6;Cluster-122255.1;Cluster-122255.2;Cluster-122255.3;Cluster-122255.4;Cluster-133071.2;Cluster-23134.0;Cluster-73608.0;Cluster-73608.1;Cl…	166	Cluster-55023.1;Cluster-55023.2;Cluster-55023.3;Cluster-104478.0;Cluster-107487.2;Cluster-128964.1;Cluster-74258.10;Cluster-74258.9;Cluster-78668.3;Cluster-78668.6;Cluster-110158.0;Cluster-110158.4;Cluster-112565.0;Cluster-112847.0;Cluster-115946.0;Cluster-116306.3;Cluster-116306.5;Cluster-116306.8;Cluster-118802.1;Cluster-118802.4;Cluster-119324.0;Cluster-122255.5;Cluster-123771.1;Cluster-133071…	188	https:\\www.genome.jp\dbget-bin\www_bget?map04070
ko00650	Butanoate metabolism	99/26245 0.377214707563345%	201/60969 0.329675736849875%	0.0441871	1	Cluster-112292.0;Cluster-112292.1;Cluster-112292.2;Cluster-112292.3;Cluster-126845.0;Cluster-126845.2;Cluster-126845.4;Cluster-127811.7;Cluster-93096.11;Cluster-93096.3;Cluster-93096.4;Cluster-93096.5;Cluster-93096.6;Cluster-93096.7;Cluster-93096.9;Cluster-46688.0;Cluster-124229.0;Cluster-124229.1;Cluster-124229.2;Cluster-124229.4;Cluster-124229.5;Cluster-124229.6;Cluster-124229.7;Cluster-34432.1…	99	Cluster-112292.0;Cluster-112292.2;Cluster-112292.3;Cluster-126845.4;Cluster-127811.7;Cluster-93096.3;Cluster-93096.4;Cluster-93096.6;Cluster-46688.0;Cluster-124229.0;Cluster-124229.1;Cluster-124229.5;Cluster-124229.7;Cluster-34432.11;Cluster-34432.14;Cluster-34432.8;Cluster-40761.0;Cluster-41584.0;Cluster-44499.0;Cluster-120535.0;Cluster-120535.10;Cluster-120535.4;Cluster-120535.5;Cluster-120535.…	62	Cluster-112292.1;Cluster-126845.0;Cluster-126845.2;Cluster-93096.11;Cluster-93096.5;Cluster-93096.7;Cluster-93096.9;Cluster-124229.2;Cluster-124229.4;Cluster-124229.6;Cluster-34432.10;Cluster-34432.12;Cluster-34432.15;Cluster-34432.9;Cluster-120535.11;Cluster-120535.2;Cluster-120535.3;Cluster-120535.9;Cluster-99255.1;Cluster-128897.1;Cluster-128897.3;Cluster-128897.7;Cluster-26574.11;Cluster-1308…	37	https:\\www.genome.jp\dbget-bin\www_bget?map00650
ko00430	Taurine and hypotaurine metabolism	26/26245 0.09906648885502%	46/60969 0.0754481785825584%	0.0454694	1	Cluster-105495.0;Cluster-117971.1;Cluster-117971.2;Cluster-117971.3;Cluster-117971.4;Cluster-130898.0;Cluster-72376.0;Cluster-120535.0;Cluster-120535.10;Cluster-120535.11;Cluster-120535.2;Cluster-120535.3;Cluster-120535.4;Cluster-120535.5;Cluster-120535.6;Cluster-120535.7;Cluster-120535.9;Cluster-39978.1;Cluster-43302.0;Cluster-99255.0;Cluster-99255.1;Cluster-41675.1;Cluster-123855.1;Cluster-1238…	26	Cluster-117971.1;Cluster-130898.0;Cluster-120535.0;Cluster-120535.10;Cluster-120535.4;Cluster-120535.5;Cluster-120535.6;Cluster-120535.7;Cluster-39978.1;Cluster-43302.0;Cluster-99255.0;Cluster-41675.1;Cluster-123855.1	13	Cluster-105495.0;Cluster-117971.2;Cluster-117971.3;Cluster-117971.4;Cluster-72376.0;Cluster-120535.11;Cluster-120535.2;Cluster-120535.3;Cluster-120535.9;Cluster-99255.1;Cluster-123855.2;Cluster-123855.3;Cluster-123855.4	13	https:\\www.genome.jp\dbget-bin\www_bget?map00430
