# Supplementary material for: An integrated targeted metabolome of phytohormones and transcriptomics analysis provides insight into the new generation of crops: Polygonatum kingianum var. grandifolium and Polygonatum kingianum
Source: Front Plant Sci. 2024 Sep 24;15:1464731. doi: 10.3389/fpls.2024.1464731 (PMC11458434; doi:10.3389/fpls.2024.1464731)
Supplement: Supplementary file 9 [file Table7.xlsx]

## Sheet: D-bud_vs_X-bud
Supplementary Table S7 DAPs and DEGs in quadrants 3 and 7 (1)
geneID	Log2FC_gene	Regulation_gene	KO	KEGG_map_gene	metaID	Log2FC_meta	Regulation_meta	Compounds	CID	KEGG_map_meta	coefficient	pvalue	ninequadrants
Cluster-100164.0	1.67397	up	K01728	ko00040,ko01100	IAA-Asp	2.79692	up	Indole-3-acetyl-L-aspartic acid	--	--	0.833138	1.76481e-05	3
Cluster-100281.0	1.3431	up	--	--	IAA-Asp	2.79692	up	Indole-3-acetyl-L-aspartic acid	--	--	0.876713	1.81031e-06	3
Cluster-100322.3	3.15418	up	--	--	IAA-Asp	2.79692	up	Indole-3-acetyl-L-aspartic acid	--	--	0.825735	2.43655e-05	3
Cluster-100997.0	1.24652	up	--	--	IAA-Asp	2.79692	up	Indole-3-acetyl-L-aspartic acid	--	--	0.802544	6.12278e-05	3
Cluster-101049.5	6.85727	up	--	--	IAA-Asp	2.79692	up	Indole-3-acetyl-L-aspartic acid	--	--	0.828511	2.1628e-05	3
Cluster-101049.6	9.15064	up	--	--	IAA-Asp	2.79692	up	Indole-3-acetyl-L-aspartic acid	--	--	0.830443	1.9882e-05	3
Cluster-101272.1	3.56642	up	--	--	IAA-Asp	2.79692	up	Indole-3-acetyl-L-aspartic acid	--	--	0.826336	2.37482e-05	3
Cluster-101272.2	9.32921	up	--	--	IAA-Asp	2.79692	up	Indole-3-acetyl-L-aspartic acid	--	--	0.824215	2.5985e-05	3
Cluster-101437.2	1.551	up	K13430	ko04626	IAA-Asp	2.79692	up	Indole-3-acetyl-L-aspartic acid	--	--	0.948065	2.25976e-09	3
Cluster-101507.2	8.7563	up	K00059	ko00061,ko00780,ko01100,ko01110,ko01212,ko01240	IAA-Asp	2.79692	up	Indole-3-acetyl-L-aspartic acid	--	--	0.807082	5.16214e-05	3
Cluster-102003.0	5.02692	up	K14488	ko04075	IAA-Asp	2.79692	up	Indole-3-acetyl-L-aspartic acid	--	--	0.843628	1.08714e-05	3
Cluster-102081.0	5.96493	up	--	--	IAA-Asp	2.79692	up	Indole-3-acetyl-L-aspartic acid	--	--	0.826839	2.32429e-05	3
Cluster-102081.12	3.52162	up	--	--	IAA-Asp	2.79692	up	Indole-3-acetyl-L-aspartic acid	--	--	0.896715	4.68873e-07	3
Cluster-102223.3	6.51902	up	--	--	IAA-Asp	2.79692	up	Indole-3-acetyl-L-aspartic acid	--	--	0.818552	3.28586e-05	3
Cluster-102359.0	7.17381	up	--	--	IAA-Asp	2.79692	up	Indole-3-acetyl-L-aspartic acid	--	--	0.805464	5.48878e-05	3
Cluster-102497.6	1.53904	up	--	--	IAA-Asp	2.79692	up	Indole-3-acetyl-L-aspartic acid	--	--	0.932691	1.71275e-08	3
Cluster-102791.6	6.76099	up	K21568	ko00999,ko01100,ko01110	IAA-Asp	2.79692	up	Indole-3-acetyl-L-aspartic acid	--	--	0.823699	2.65558e-05	3
Cluster-102995.2	4.19598	up	K06130	ko00564	IAA-Asp	2.79692	up	Indole-3-acetyl-L-aspartic acid	--	--	0.875544	1.94483e-06	3
Cluster-103101.5	1.12036	up	K14432	ko04075	IAA-Asp	2.79692	up	Indole-3-acetyl-L-aspartic acid	--	--	0.837074	1.47725e-05	3
Cluster-103178.3	1.29587	up	K13496	ko00908,ko01110	IAA-Asp	2.79692	up	Indole-3-acetyl-L-aspartic acid	--	--	0.845622	9.87547e-06	3
Cluster-103232.0	7.1495	up	K13258	ko00943,ko01100,ko01110	IAA-Asp	2.79692	up	Indole-3-acetyl-L-aspartic acid	--	--	0.810665	4.49724e-05	3
Cluster-103323.2	2.30217	up	--	--	IAA-Asp	2.79692	up	Indole-3-acetyl-L-aspartic acid	--	--	0.918825	7.33089e-08	3
Cluster-103333.5	1.72418	insig	--	--	IAA-Asp	2.79692	up	Indole-3-acetyl-L-aspartic acid	--	--	0.883065	1.21058e-06	3
Cluster-10360.4	1.7333	insig	--	--	IAA-Asp	2.79692	up	Indole-3-acetyl-L-aspartic acid	--	--	0.882159	1.28391e-06	3
Cluster-103722.1	9.26241	up	--	--	IAA-Asp	2.79692	up	Indole-3-acetyl-L-aspartic acid	--	--	0.841042	1.22894e-05	3
Cluster-103756.0	1.39203	up	--	--	IAA-Asp	2.79692	up	Indole-3-acetyl-L-aspartic acid	--	--	0.81065	4.4999e-05	3
Cluster-103800.7	1.01603	up	--	--	IAA-Asp	2.79692	up	Indole-3-acetyl-L-aspartic acid	--	--	0.918234	7.75406e-08	3
Cluster-103978.0	2.07592	up	--	--	IAA-Asp	2.79692	up	Indole-3-acetyl-L-aspartic acid	--	--	0.815079	3.77961e-05	3
Cluster-104363.2	1.11354	up	K13425	ko04016,ko04626	IAA-Asp	2.79692	up	Indole-3-acetyl-L-aspartic acid	--	--	0.871368	2.49794e-06	3
Cluster-104363.4	7.74674	up	K13425	ko04016,ko04626	IAA-Asp	2.79692	up	Indole-3-acetyl-L-aspartic acid	--	--	0.807298	5.11986e-05	3
Cluster-104518.2	2.03337	up	K15397	ko00062,ko01100,ko01110,ko04626	IAA-Asp	2.79692	up	Indole-3-acetyl-L-aspartic acid	--	--	0.915143	1.03306e-07	3
Cluster-104518.5	6.69656	up	K15397	ko00062,ko01100,ko01110,ko04626	IAA-Asp	2.79692	up	Indole-3-acetyl-L-aspartic acid	--	--	0.911733	1.40046e-07	3
Cluster-104846.8	4.85819	up	--	--	IAA-Asp	2.79692	up	Indole-3-acetyl-L-aspartic acid	--	--	0.804568	5.67721e-05	3
Cluster-105312.1	1.33582	up	K00487	ko00130,ko00940,ko00941,ko00945,ko01100,ko01110	IAA-Asp	2.79692	up	Indole-3-acetyl-L-aspartic acid	--	--	0.846691	9.37484e-06	3
Cluster-105405.0	7.24372	up	--	--	IAA-Asp	2.79692	up	Indole-3-acetyl-L-aspartic acid	--	--	0.833905	1.70528e-05	3
Cluster-105461.6	1.42975	up	--	--	IAA-Asp	2.79692	up	Indole-3-acetyl-L-aspartic acid	--	--	0.881381	1.34985e-06	3
Cluster-105469.1	4.70396	up	K18696	ko00564	IAA-Asp	2.79692	up	Indole-3-acetyl-L-aspartic acid	--	--	0.844213	1.05707e-05	3
Cluster-105540.0	8.41074	up	K23260	ko00999,ko01110	IAA-Asp	2.79692	up	Indole-3-acetyl-L-aspartic acid	--	--	0.83667	1.50483e-05	3
Cluster-105587.4	9.24212	up	K22374	ko00999,ko01100,ko01110	IAA-Asp	2.79692	up	Indole-3-acetyl-L-aspartic acid	--	--	0.814157	3.92077e-05	3
Cluster-105706.0	1.80587	up	K17686	ko04016	IAA-Asp	2.79692	up	Indole-3-acetyl-L-aspartic acid	--	--	0.870155	2.6821e-06	3
Cluster-106445.0	9.24799	up	K00951	ko00230,ko01100	IAA-Asp	2.79692	up	Indole-3-acetyl-L-aspartic acid	--	--	0.802204	6.20056e-05	3
Cluster-106589.1	1.93089	insig	--	--	IAA-Asp	2.79692	up	Indole-3-acetyl-L-aspartic acid	--	--	0.825903	2.41916e-05	3
Cluster-106769.4	8.70527	up	--	--	IAA-Asp	2.79692	up	Indole-3-acetyl-L-aspartic acid	--	--	0.801565	6.34895e-05	3
Cluster-107574.3	11.1245	up	K06617	ko00052,ko01100	IAA-Asp	2.79692	up	Indole-3-acetyl-L-aspartic acid	--	--	0.830907	1.94803e-05	3
Cluster-107642.5	5.50796	up	--	--	IAA-Asp	2.79692	up	Indole-3-acetyl-L-aspartic acid	--	--	0.83797	1.41772e-05	3
Cluster-108004.10	9.49283	up	K01824	ko00100,ko01100,ko01110	IAA-Asp	2.79692	up	Indole-3-acetyl-L-aspartic acid	--	--	0.800893	6.50815e-05	3
Cluster-108044.2	8.09966	up	--	--	IAA-Asp	2.79692	up	Indole-3-acetyl-L-aspartic acid	--	--	0.828652	2.14956e-05	3
Cluster-108079.0	1.14438	up	--	--	IAA-Asp	2.79692	up	Indole-3-acetyl-L-aspartic acid	--	--	0.864842	3.63265e-06	3
Cluster-108106.1	1.34884	up	K01599	ko00860,ko01100,ko01110,ko01240	IAA-Asp	2.79692	up	Indole-3-acetyl-L-aspartic acid	--	--	0.820458	3.03901e-05	3
Cluster-108327.2	7.96933	up	K01593	ko00350,ko00360,ko00380,ko00901,ko00950,ko00965,ko01100,ko01110	IAA-Asp	2.79692	up	Indole-3-acetyl-L-aspartic acid	--	--	0.805633	5.45392e-05	3
Cluster-108373.2	6.63553	up	--	--	IAA-Asp	2.79692	up	Indole-3-acetyl-L-aspartic acid	--	--	0.800438	6.61798e-05	3
Cluster-108373.7	9.74615	up	--	--	IAA-Asp	2.79692	up	Indole-3-acetyl-L-aspartic acid	--	--	0.805972	5.38432e-05	3
Cluster-108499.0	7.24244	up	K12864	ko03040	IAA-Asp	2.79692	up	Indole-3-acetyl-L-aspartic acid	--	--	0.80849	4.8915e-05	3
Cluster-108677.3	3.60712	up	--	--	IAA-Asp	2.79692	up	Indole-3-acetyl-L-aspartic acid	--	--	0.83858	1.37839e-05	3
Cluster-108739.0	6.57962	up	--	--	IAA-Asp	2.79692	up	Indole-3-acetyl-L-aspartic acid	--	--	0.81933	3.18308e-05	3
Cluster-108739.6	7.91604	up	--	--	IAA-Asp	2.79692	up	Indole-3-acetyl-L-aspartic acid	--	--	0.833315	1.7509e-05	3
Cluster-108817.2	7.27894	up	--	--	IAA-Asp	2.79692	up	Indole-3-acetyl-L-aspartic acid	--	--	0.829548	2.06746e-05	3
Cluster-108959.5	3.35542	up	K08678	ko00520,ko01100,ko01250	IAA-Asp	2.79692	up	Indole-3-acetyl-L-aspartic acid	--	--	0.810914	4.45394e-05	3
Cluster-109077.1	1.01326	up	K05857	ko00562,ko01100,ko04070	IAA-Asp	2.79692	up	Indole-3-acetyl-L-aspartic acid	--	--	0.943104	4.61535e-09	3
Cluster-109103.11	7.5638	up	--	--	IAA-Asp	2.79692	up	Indole-3-acetyl-L-aspartic acid	--	--	0.821576	2.90172e-05	3
Cluster-109908.0	7.20994	up	--	--	IAA-Asp	2.79692	up	Indole-3-acetyl-L-aspartic acid	--	--	0.800769	6.53791e-05	3
Cluster-110025.7	8.14477	up	--	--	IAA-Asp	2.79692	up	Indole-3-acetyl-L-aspartic acid	--	--	0.823439	2.68474e-05	3
Cluster-110106.3	5.43749	up	--	--	IAA-Asp	2.79692	up	Indole-3-acetyl-L-aspartic acid	--	--	0.81237	4.20732e-05	3
Cluster-110106.6	8.88006	up	--	--	IAA-Asp	2.79692	up	Indole-3-acetyl-L-aspartic acid	--	--	0.840286	1.2733e-05	3
Cluster-110227.2	2.03394	up	K01723	ko00592,ko01100,ko01110	IAA-Asp	2.79692	up	Indole-3-acetyl-L-aspartic acid	--	--	0.891881	6.65486e-07	3
Cluster-110227.6	9.20881	up	K01723	ko00592,ko01100,ko01110	IAA-Asp	2.79692	up	Indole-3-acetyl-L-aspartic acid	--	--	0.862906	4.04444e-06	3
Cluster-11039.4	6.68199	up	K01873	ko00970	IAA-Asp	2.79692	up	Indole-3-acetyl-L-aspartic acid	--	--	0.806311	5.3157e-05	3
Cluster-110477.1	1.16977	up	K13430	ko04626	IAA-Asp	2.79692	up	Indole-3-acetyl-L-aspartic acid	--	--	0.820471	3.03742e-05	3
Cluster-110686.1	7.4444	up	K03787	ko00230,ko00240,ko00760,ko01100,ko01110,ko01232	IAA-Asp	2.79692	up	Indole-3-acetyl-L-aspartic acid	--	--	0.810341	4.55421e-05	3
Cluster-110987.0	5.8751	up	--	--	IAA-Asp	2.79692	up	Indole-3-acetyl-L-aspartic acid	--	--	0.84995	7.97999e-06	3
Cluster-111177.4	11.4006	up	--	--	IAA-Asp	2.79692	up	Indole-3-acetyl-L-aspartic acid	--	--	0.827415	2.26757e-05	3
Cluster-111455.0	1.23874	up	K05391	ko04626	IAA-Asp	2.79692	up	Indole-3-acetyl-L-aspartic acid	--	--	0.83556	1.58268e-05	3
Cluster-111663.0	5.68448	up	--	--	IAA-Asp	2.79692	up	Indole-3-acetyl-L-aspartic acid	--	--	0.809087	4.7804e-05	3
Cluster-111663.3	9.80542	up	--	--	IAA-Asp	2.79692	up	Indole-3-acetyl-L-aspartic acid	--	--	0.822	2.85107e-05	3
Cluster-111958.5	7.53125	up	K06689	ko04120,ko04141	IAA-Asp	2.79692	up	Indole-3-acetyl-L-aspartic acid	--	--	0.819282	3.18938e-05	3
Cluster-112082.0	6.94916	up	--	--	IAA-Asp	2.79692	up	Indole-3-acetyl-L-aspartic acid	--	--	0.839635	1.31254e-05	3
Cluster-112082.3	9.164	up	--	--	IAA-Asp	2.79692	up	Indole-3-acetyl-L-aspartic acid	--	--	0.831151	1.92726e-05	3
Cluster-112082.7	2.10866	up	--	--	IAA-Asp	2.79692	up	Indole-3-acetyl-L-aspartic acid	--	--	0.896708	4.69109e-07	3
Cluster-112239.9	10.1421	up	--	--	IAA-Asp	2.79692	up	Indole-3-acetyl-L-aspartic acid	--	--	0.807923	4.99903e-05	3
Cluster-112759.3	4.18531	up	--	--	IAA-Asp	2.79692	up	Indole-3-acetyl-L-aspartic acid	--	--	0.811432	4.36475e-05	3
Cluster-112836.1	1.71147	up	--	--	IAA-Asp	2.79692	up	Indole-3-acetyl-L-aspartic acid	--	--	0.828825	2.13349e-05	3
Cluster-113105.4	7.708	up	K20769	ko00073	IAA-Asp	2.79692	up	Indole-3-acetyl-L-aspartic acid	--	--	0.818249	3.32659e-05	3
Cluster-113575.2	6.66355	up	K00660	ko00941,ko00960,ko01100,ko01110,ko04712	IAA-Asp	2.79692	up	Indole-3-acetyl-L-aspartic acid	--	--	0.807662	5.04919e-05	3
Cluster-113670.3	1.50027	insig	--	--	IAA-Asp	2.79692	up	Indole-3-acetyl-L-aspartic acid	--	--	0.813759	3.98322e-05	3
Cluster-114206.1	1.0484	up	--	--	IAA-Asp	2.79692	up	Indole-3-acetyl-L-aspartic acid	--	--	0.853441	6.68713e-06	3
Cluster-114222.1	7.6858	up	K13070	ko00904,ko01110	IAA-Asp	2.79692	up	Indole-3-acetyl-L-aspartic acid	--	--	0.813751	3.9844e-05	3
Cluster-114262.0	8.3909	up	K02183	ko04016,ko04070,ko04626	IAA-Asp	2.79692	up	Indole-3-acetyl-L-aspartic acid	--	--	0.81774	3.39603e-05	3
Cluster-114445.0	1.12327	up	--	--	IAA-Asp	2.79692	up	Indole-3-acetyl-L-aspartic acid	--	--	0.884222	1.12226e-06	3
Cluster-114482.1	1.95555	up	K00665	ko00061,ko01100,ko01212	IAA-Asp	2.79692	up	Indole-3-acetyl-L-aspartic acid	--	--	0.861447	4.38064e-06	3
Cluster-114582.5	8.255	up	K22771	ko00944	IAA-Asp	2.79692	up	Indole-3-acetyl-L-aspartic acid	--	--	0.815743	3.68055e-05	3
Cluster-115258.2	7.75083	up	--	--	IAA-Asp	2.79692	up	Indole-3-acetyl-L-aspartic acid	--	--	0.826138	2.39505e-05	3
Cluster-115273.3	7.35007	up	K18081	ko00562,ko01100,ko04070	IAA-Asp	2.79692	up	Indole-3-acetyl-L-aspartic acid	--	--	0.8182	3.33313e-05	3
Cluster-115400.2	7.11247	up	--	--	IAA-Asp	2.79692	up	Indole-3-acetyl-L-aspartic acid	--	--	0.822362	2.80845e-05	3
Cluster-11598.8	1.14335	insig	--	--	IAA-Asp	2.79692	up	Indole-3-acetyl-L-aspartic acid	--	--	0.809528	4.69984e-05	3
Cluster-116062.5	1.04338	insig	--	--	IAA-Asp	2.79692	up	Indole-3-acetyl-L-aspartic acid	--	--	0.833286	1.75315e-05	3
Cluster-116184.6	1.09281	up	K02183	ko04016,ko04070,ko04626	IAA-Asp	2.79692	up	Indole-3-acetyl-L-aspartic acid	--	--	0.92847	2.74871e-08	3
Cluster-116306.1	2.68101	up	K00901	ko00561,ko00564,ko01100,ko01110,ko04070	IAA-Asp	2.79692	up	Indole-3-acetyl-L-aspartic acid	--	--	0.828182	2.19374e-05	3
Cluster-116341.1	1.15915	up	--	--	IAA-Asp	2.79692	up	Indole-3-acetyl-L-aspartic acid	--	--	0.836541	1.5137e-05	3
Cluster-116343.2	10.3881	up	--	--	IAA-Asp	2.79692	up	Indole-3-acetyl-L-aspartic acid	--	--	0.80168	6.32198e-05	3
Cluster-116516.1	7.73975	up	--	--	IAA-Asp	2.79692	up	Indole-3-acetyl-L-aspartic acid	--	--	0.826401	2.36824e-05	3
Cluster-116722.13	1.64746	up	K17839	ko00330,ko00410,ko00770,ko01100	IAA-Asp	2.79692	up	Indole-3-acetyl-L-aspartic acid	--	--	0.891718	6.73186e-07	3
Cluster-116916.1	4.76344	up	--	--	IAA-Asp	2.79692	up	Indole-3-acetyl-L-aspartic acid	--	--	0.871532	2.47394e-06	3
Cluster-116959.14	1.87252	up	--	--	IAA-Asp	2.79692	up	Indole-3-acetyl-L-aspartic acid	--	--	0.853849	6.54831e-06	3
Cluster-117002.1	7.2428	up	K13464	ko04075	IAA-Asp	2.79692	up	Indole-3-acetyl-L-aspartic acid	--	--	0.826687	2.33949e-05	3
Cluster-117286.5	3.77859	up	K12349	ko00600,ko01100	IAA-Asp	2.79692	up	Indole-3-acetyl-L-aspartic acid	--	--	0.849844	8.0223e-06	3
Cluster-11740.103	8.14267	up	K13424	ko04016,ko04626	IAA-Asp	2.79692	up	Indole-3-acetyl-L-aspartic acid	--	--	0.814563	3.858e-05	3
Cluster-117985.2	2.00437	up	--	--	IAA-Asp	2.79692	up	Indole-3-acetyl-L-aspartic acid	--	--	0.843268	1.10596e-05	3
Cluster-118433.7	1.0213	up	--	--	IAA-Asp	2.79692	up	Indole-3-acetyl-L-aspartic acid	--	--	0.807353	5.10906e-05	3
Cluster-118569.3	8.90409	up	--	--	IAA-Asp	2.79692	up	Indole-3-acetyl-L-aspartic acid	--	--	0.823674	2.65834e-05	3
Cluster-118682.1	6.88092	up	--	--	IAA-Asp	2.79692	up	Indole-3-acetyl-L-aspartic acid	--	--	0.826196	2.38912e-05	3
Cluster-118864.14	8.38726	up	--	--	IAA-Asp	2.79692	up	Indole-3-acetyl-L-aspartic acid	--	--	0.81505	3.78399e-05	3
Cluster-118908.5	1.23225	insig	--	--	IAA-Asp	2.79692	up	Indole-3-acetyl-L-aspartic acid	--	--	0.811201	4.40438e-05	3
Cluster-119038.6	4.77347	up	--	--	IAA-Asp	2.79692	up	Indole-3-acetyl-L-aspartic acid	--	--	0.803636	5.87877e-05	3
Cluster-119136.2	5.5978	up	--	--	IAA-Asp	2.79692	up	Indole-3-acetyl-L-aspartic acid	--	--	0.832564	1.81049e-05	3
Cluster-119136.4	8.62356	up	--	--	IAA-Asp	2.79692	up	Indole-3-acetyl-L-aspartic acid	--	--	0.82715	2.2935e-05	3
Cluster-119215.3	1.86126	up	--	--	IAA-Asp	2.79692	up	Indole-3-acetyl-L-aspartic acid	--	--	0.836131	1.5422e-05	3
Cluster-119292.5	7.31332	up	K00121	ko00010,ko00071,ko00350,ko00620,ko01100,ko01110,ko01200	IAA-Asp	2.79692	up	Indole-3-acetyl-L-aspartic acid	--	--	0.808527	4.88459e-05	3
Cluster-119366.10	4.11907	up	K10950	ko04141	IAA-Asp	2.79692	up	Indole-3-acetyl-L-aspartic acid	--	--	0.802138	6.21585e-05	3
Cluster-119517.2	10.7122	up	K00850	ko00010,ko00030,ko00051,ko00052,ko01100,ko01110,ko01200,ko01230,ko03018	IAA-Asp	2.79692	up	Indole-3-acetyl-L-aspartic acid	--	--	0.805314	5.51991e-05	3
Cluster-119538.17	1.124	up	--	--	IAA-Asp	2.79692	up	Indole-3-acetyl-L-aspartic acid	--	--	0.908229	1.89065e-07	3
Cluster-119547.2	1.97481	up	K07937	ko04144	IAA-Asp	2.79692	up	Indole-3-acetyl-L-aspartic acid	--	--	0.89441	5.55218e-07	3
Cluster-119563.3	10.6819	up	--	--	IAA-Asp	2.79692	up	Indole-3-acetyl-L-aspartic acid	--	--	0.825207	2.49176e-05	3
Cluster-120063.3	3.74756	up	--	--	IAA-Asp	2.79692	up	Indole-3-acetyl-L-aspartic acid	--	--	0.926107	3.5383e-08	3
Cluster-120462.6	1.20444	insig	K13433	ko04626	IAA-Asp	2.79692	up	Indole-3-acetyl-L-aspartic acid	--	--	0.835412	1.59339e-05	3
Cluster-120938.2	1.21911	insig	K02291	ko00906,ko01100,ko01110	IAA-Asp	2.79692	up	Indole-3-acetyl-L-aspartic acid	--	--	0.83586	1.5613e-05	3
Cluster-120972.5	1.77854	up	K13457	ko04626	IAA-Asp	2.79692	up	Indole-3-acetyl-L-aspartic acid	--	--	0.939942	7.0432e-09	3
Cluster-121045.5	6.62991	up	--	--	IAA-Asp	2.79692	up	Indole-3-acetyl-L-aspartic acid	--	--	0.800439	6.61773e-05	3
Cluster-121099.1	2.97604	up	--	--	IAA-Asp	2.79692	up	Indole-3-acetyl-L-aspartic acid	--	--	0.820671	3.01249e-05	3
Cluster-121249.2	7.04941	up	--	--	IAA-Asp	2.79692	up	Indole-3-acetyl-L-aspartic acid	--	--	0.830744	1.96208e-05	3
Cluster-121687.0	3.64016	up	--	--	IAA-Asp	2.79692	up	Indole-3-acetyl-L-aspartic acid	--	--	0.949183	1.90558e-09	3
Cluster-121722.4	1.64616	up	K00847	ko00051,ko00500,ko00520,ko01100,ko01110,ko01250	IAA-Asp	2.79692	up	Indole-3-acetyl-L-aspartic acid	--	--	0.845745	9.81678e-06	3
Cluster-122007.3	8.13436	up	K02952	ko03010	IAA-Asp	2.79692	up	Indole-3-acetyl-L-aspartic acid	--	--	0.83952	1.31959e-05	3
Cluster-122075.0	3.3459	up	K09753	ko00940,ko01100,ko01110	IAA-Asp	2.79692	up	Indole-3-acetyl-L-aspartic acid	--	--	0.927544	3.0376e-08	3
Cluster-122153.5	6.63528	up	--	--	IAA-Asp	2.79692	up	Indole-3-acetyl-L-aspartic acid	--	--	0.81528	3.74942e-05	3
Cluster-122153.7	1.8945	up	--	--	IAA-Asp	2.79692	up	Indole-3-acetyl-L-aspartic acid	--	--	0.908703	1.81672e-07	3
Cluster-122312.3	1.04624	up	--	--	IAA-Asp	2.79692	up	Indole-3-acetyl-L-aspartic acid	--	--	0.901088	3.36441e-07	3
Cluster-122358.1	7.72502	up	K09828	ko00100,ko01100,ko01110	IAA-Asp	2.79692	up	Indole-3-acetyl-L-aspartic acid	--	--	0.818606	3.27855e-05	3
Cluster-122358.2	9.10951	up	K09828	ko00100,ko01100,ko01110	IAA-Asp	2.79692	up	Indole-3-acetyl-L-aspartic acid	--	--	0.804518	5.68787e-05	3
Cluster-122358.3	4.4848	up	K09828	ko00100,ko01100,ko01110	IAA-Asp	2.79692	up	Indole-3-acetyl-L-aspartic acid	--	--	0.807555	5.06986e-05	3
Cluster-122361.0	7.71407	up	K03363	ko04120	IAA-Asp	2.79692	up	Indole-3-acetyl-L-aspartic acid	--	--	0.821626	2.89571e-05	3
Cluster-122850.0	7.86935	up	--	--	IAA-Asp	2.79692	up	Indole-3-acetyl-L-aspartic acid	--	--	0.837019	1.48099e-05	3
Cluster-122958.3	7.6058	up	--	--	IAA-Asp	2.79692	up	Indole-3-acetyl-L-aspartic acid	--	--	0.813094	4.08927e-05	3
Cluster-123157.4	5.25731	up	--	--	IAA-Asp	2.79692	up	Indole-3-acetyl-L-aspartic acid	--	--	0.818111	3.34527e-05	3
Cluster-123171.10	7.80947	up	--	--	IAA-Asp	2.79692	up	Indole-3-acetyl-L-aspartic acid	--	--	0.820683	3.0109e-05	3
Cluster-123171.4	5.85689	up	--	--	IAA-Asp	2.79692	up	Indole-3-acetyl-L-aspartic acid	--	--	0.81083	4.46845e-05	3
Cluster-123278.5	5.52888	up	--	--	IAA-Asp	2.79692	up	Indole-3-acetyl-L-aspartic acid	--	--	0.822421	2.80149e-05	3
Cluster-123290.1	7.76319	up	K13412	ko04626	IAA-Asp	2.79692	up	Indole-3-acetyl-L-aspartic acid	--	--	0.820453	3.03967e-05	3
Cluster-123574.4	3.23335	up	K12471	ko04144	IAA-Asp	2.79692	up	Indole-3-acetyl-L-aspartic acid	--	--	0.882548	1.25197e-06	3
Cluster-12358.7	2.40232	up	--	--	IAA-Asp	2.79692	up	Indole-3-acetyl-L-aspartic acid	--	--	0.905338	2.40048e-07	3
Cluster-123615.3	6.65708	up	--	--	IAA-Asp	2.79692	up	Indole-3-acetyl-L-aspartic acid	--	--	0.838312	1.39558e-05	3
Cluster-123989.4	2.97428	up	K03283	ko03040,ko04141,ko04144	IAA-Asp	2.79692	up	Indole-3-acetyl-L-aspartic acid	--	--	0.830023	2.02502e-05	3
Cluster-124039.5	7.92555	up	--	--	IAA-Asp	2.79692	up	Indole-3-acetyl-L-aspartic acid	--	--	0.833022	1.77397e-05	3
Cluster-124125.15	2.49679	up	--	--	IAA-Asp	2.79692	up	Indole-3-acetyl-L-aspartic acid	--	--	0.910165	1.60405e-07	3
Cluster-124190.10	1.07499	insig	--	--	IAA-Asp	2.79692	up	Indole-3-acetyl-L-aspartic acid	--	--	0.824794	2.5358e-05	3
Cluster-124729.7	2.56592	up	--	--	IAA-Asp	2.79692	up	Indole-3-acetyl-L-aspartic acid	--	--	0.839112	1.34485e-05	3
Cluster-124806.1	4.26882	up	--	--	IAA-Asp	2.79692	up	Indole-3-acetyl-L-aspartic acid	--	--	0.814368	3.88816e-05	3
Cluster-124839.9	2.98932	up	--	--	IAA-Asp	2.79692	up	Indole-3-acetyl-L-aspartic acid	--	--	0.935013	1.30306e-08	3
Cluster-125224.2	8.12656	up	K05643	ko02010	IAA-Asp	2.79692	up	Indole-3-acetyl-L-aspartic acid	--	--	0.820045	3.09106e-05	3
Cluster-125318.0	2.40277	up	--	--	IAA-Asp	2.79692	up	Indole-3-acetyl-L-aspartic acid	--	--	0.83798	1.4171e-05	3
Cluster-125320.0	3.78093	up	--	--	IAA-Asp	2.79692	up	Indole-3-acetyl-L-aspartic acid	--	--	0.863896	3.82904e-06	3
Cluster-125434.2	1.55188	up	--	--	IAA-Asp	2.79692	up	Indole-3-acetyl-L-aspartic acid	--	--	0.825885	2.42099e-05	3
Cluster-125527.3	4.30203	up	--	--	IAA-Asp	2.79692	up	Indole-3-acetyl-L-aspartic acid	--	--	0.821732	2.88297e-05	3
Cluster-125561.4	9.07873	up	--	--	IAA-Asp	2.79692	up	Indole-3-acetyl-L-aspartic acid	--	--	0.812847	4.12917e-05	3
Cluster-125561.5	2.65422	insig	--	--	IAA-Asp	2.79692	up	Indole-3-acetyl-L-aspartic acid	--	--	0.869738	2.74798e-06	3
Cluster-125561.7	3.90914	up	--	--	IAA-Asp	2.79692	up	Indole-3-acetyl-L-aspartic acid	--	--	0.819488	3.16249e-05	3
Cluster-125580.0	2.0889	up	--	--	IAA-Asp	2.79692	up	Indole-3-acetyl-L-aspartic acid	--	--	0.803942	5.81191e-05	3
Cluster-125748.1	1.01101	up	--	--	IAA-Asp	2.79692	up	Indole-3-acetyl-L-aspartic acid	--	--	0.85702	5.55232e-06	3
Cluster-125748.4	4.25326	up	--	--	IAA-Asp	2.79692	up	Indole-3-acetyl-L-aspartic acid	--	--	0.865346	3.53139e-06	3
Cluster-125767.2	8.60393	up	--	--	IAA-Asp	2.79692	up	Indole-3-acetyl-L-aspartic acid	--	--	0.834383	1.66908e-05	3
Cluster-126014.3	9.99677	up	--	--	IAA-Asp	2.79692	up	Indole-3-acetyl-L-aspartic acid	--	--	0.80809	4.96722e-05	3
Cluster-126030.3	1.509	up	--	--	IAA-Asp	2.79692	up	Indole-3-acetyl-L-aspartic acid	--	--	0.950363	1.58498e-09	3
Cluster-126188.25	6.27578	up	--	--	IAA-Asp	2.79692	up	Indole-3-acetyl-L-aspartic acid	--	--	0.819258	3.19245e-05	3
Cluster-126227.0	1.57388	up	--	--	IAA-Asp	2.79692	up	Indole-3-acetyl-L-aspartic acid	--	--	0.96774	5.33083e-11	3
Cluster-126227.1	2.55606	up	--	--	IAA-Asp	2.79692	up	Indole-3-acetyl-L-aspartic acid	--	--	0.866695	3.27264e-06	3
Cluster-126542.6	9.03202	up	K00469	ko00053,ko00562,ko01100,ko01250	IAA-Asp	2.79692	up	Indole-3-acetyl-L-aspartic acid	--	--	0.842569	1.14339e-05	3
Cluster-126616.0	3.88681	up	K25075	ko00943,ko01100,ko01110	IAA-Asp	2.79692	up	Indole-3-acetyl-L-aspartic acid	--	--	0.844694	1.03288e-05	3
Cluster-126637.6	11.3353	up	K12355	ko00940,ko01110	IAA-Asp	2.79692	up	Indole-3-acetyl-L-aspartic acid	--	--	0.829989	2.02804e-05	3
Cluster-126657.7	2.81071	up	--	--	IAA-Asp	2.79692	up	Indole-3-acetyl-L-aspartic acid	--	--	0.903465	2.79088e-07	3
Cluster-127001.1	7.80057	up	K01514	ko00230,ko01100	IAA-Asp	2.79692	up	Indole-3-acetyl-L-aspartic acid	--	--	0.809307	4.74015e-05	3
Cluster-127080.2	5.67237	up	--	--	IAA-Asp	2.79692	up	Indole-3-acetyl-L-aspartic acid	--	--	0.837316	1.46099e-05	3
Cluster-127501.0	6.68887	up	--	--	IAA-Asp	2.79692	up	Indole-3-acetyl-L-aspartic acid	--	--	0.803216	5.97163e-05	3
Cluster-127900.0	5.32126	up	--	--	IAA-Asp	2.79692	up	Indole-3-acetyl-L-aspartic acid	--	--	0.841401	1.20836e-05	3
Cluster-128046.12	1.953	up	--	--	IAA-Asp	2.79692	up	Indole-3-acetyl-L-aspartic acid	--	--	0.830534	1.98027e-05	3
Cluster-128046.6	3.30231	up	--	--	IAA-Asp	2.79692	up	Indole-3-acetyl-L-aspartic acid	--	--	0.830634	1.97156e-05	3
Cluster-128076.119	7.76721	up	--	--	IAA-Asp	2.79692	up	Indole-3-acetyl-L-aspartic acid	--	--	0.817697	3.40198e-05	3
Cluster-128076.89	2.26922	up	K00480	ko01100	IAA-Asp	2.79692	up	Indole-3-acetyl-L-aspartic acid	--	--	0.924259	4.28581e-08	3
Cluster-128076.97	2.9648	up	K09838	ko00906,ko01100,ko01110	IAA-Asp	2.79692	up	Indole-3-acetyl-L-aspartic acid	--	--	0.942108	5.28605e-09	3
Cluster-128076.98	3.19459	up	K09838	ko00906,ko01100,ko01110	IAA-Asp	2.79692	up	Indole-3-acetyl-L-aspartic acid	--	--	0.94895	1.97501e-09	3
Cluster-128102.0	3.0965	up	--	--	IAA-Asp	2.79692	up	Indole-3-acetyl-L-aspartic acid	--	--	0.841397	1.20858e-05	3
Cluster-128288.1	1.33078	up	--	--	IAA-Asp	2.79692	up	Indole-3-acetyl-L-aspartic acid	--	--	0.847124	9.17838e-06	3
Cluster-128348.3	8.50555	up	K09291	ko03013	IAA-Asp	2.79692	up	Indole-3-acetyl-L-aspartic acid	--	--	0.824537	2.56345e-05	3
Cluster-128348.4	8.05453	up	K09291	ko03013	IAA-Asp	2.79692	up	Indole-3-acetyl-L-aspartic acid	--	--	0.826184	2.39032e-05	3
Cluster-128579.1	9.29718	up	K15631	ko00790,ko01100	IAA-Asp	2.79692	up	Indole-3-acetyl-L-aspartic acid	--	--	0.82933	2.08718e-05	3
Cluster-128592.0	2.33588	up	--	--	IAA-Asp	2.79692	up	Indole-3-acetyl-L-aspartic acid	--	--	0.896845	4.64365e-07	3
Cluster-128622.0	6.68906	up	--	--	IAA-Asp	2.79692	up	Indole-3-acetyl-L-aspartic acid	--	--	0.821869	2.86662e-05	3
Cluster-128622.4	9.34413	up	--	--	IAA-Asp	2.79692	up	Indole-3-acetyl-L-aspartic acid	--	--	0.809215	4.757e-05	3
Cluster-128656.2	7.1141	up	K14484	ko04075	IAA-Asp	2.79692	up	Indole-3-acetyl-L-aspartic acid	--	--	0.829437	2.07749e-05	3
Cluster-128741.5	2.19316	up	--	--	IAA-Asp	2.79692	up	Indole-3-acetyl-L-aspartic acid	--	--	0.802349	6.16726e-05	3
Cluster-128786.1	1.46197	up	K22133	ko00630,ko01100	IAA-Asp	2.79692	up	Indole-3-acetyl-L-aspartic acid	--	--	0.896404	4.79788e-07	3
Cluster-128822.18	3.83107	up	--	--	IAA-Asp	2.79692	up	Indole-3-acetyl-L-aspartic acid	--	--	0.813802	3.97641e-05	3
Cluster-128822.3	4.73387	up	--	--	IAA-Asp	2.79692	up	Indole-3-acetyl-L-aspartic acid	--	--	0.820458	3.03906e-05	3
Cluster-128822.9	6.54523	up	--	--	IAA-Asp	2.79692	up	Indole-3-acetyl-L-aspartic acid	--	--	0.824703	2.54555e-05	3
Cluster-129229.0	5.75764	up	--	--	IAA-Asp	2.79692	up	Indole-3-acetyl-L-aspartic acid	--	--	0.821342	2.93004e-05	3
Cluster-129243.9	7.4435	up	--	--	IAA-Asp	2.79692	up	Indole-3-acetyl-L-aspartic acid	--	--	0.805787	5.42212e-05	3
Cluster-129728.5	1.25441	up	K13448	ko04626	IAA-Asp	2.79692	up	Indole-3-acetyl-L-aspartic acid	--	--	0.853791	6.56807e-06	3
Cluster-129728.9	2.6793	up	K13448	ko04626	IAA-Asp	2.79692	up	Indole-3-acetyl-L-aspartic acid	--	--	0.871388	2.495e-06	3
Cluster-129836.12	8.21653	up	--	--	IAA-Asp	2.79692	up	Indole-3-acetyl-L-aspartic acid	--	--	0.821092	2.96049e-05	3
Cluster-129958.4	1.16485	up	--	--	IAA-Asp	2.79692	up	Indole-3-acetyl-L-aspartic acid	--	--	0.834204	1.68255e-05	3
Cluster-130037.0	2.56162	up	--	--	IAA-Asp	2.79692	up	Indole-3-acetyl-L-aspartic acid	--	--	0.817057	3.49112e-05	3
Cluster-130179.0	2.82899	up	--	--	IAA-Asp	2.79692	up	Indole-3-acetyl-L-aspartic acid	--	--	0.949693	1.76058e-09	3
Cluster-130327.13	2.30433	up	K18696	ko00564	IAA-Asp	2.79692	up	Indole-3-acetyl-L-aspartic acid	--	--	0.91032	1.58287e-07	3
Cluster-130339.4	3.04981	up	K12472	ko04144	IAA-Asp	2.79692	up	Indole-3-acetyl-L-aspartic acid	--	--	0.836991	1.48286e-05	3
Cluster-130427.0	6.57238	up	K04124	ko00904,ko01100,ko01110	IAA-Asp	2.79692	up	Indole-3-acetyl-L-aspartic acid	--	--	0.826272	2.38131e-05	3
Cluster-130435.2	1.59632	up	--	--	IAA-Asp	2.79692	up	Indole-3-acetyl-L-aspartic acid	--	--	0.800079	6.70545e-05	3
Cluster-130437.15	1.70527	up	--	--	IAA-Asp	2.79692	up	Indole-3-acetyl-L-aspartic acid	--	--	0.824752	2.54022e-05	3
Cluster-130437.8	6.81322	up	--	--	IAA-Asp	2.79692	up	Indole-3-acetyl-L-aspartic acid	--	--	0.830118	2.01664e-05	3
Cluster-130696.3	8.06408	up	--	--	IAA-Asp	2.79692	up	Indole-3-acetyl-L-aspartic acid	--	--	0.839113	1.34479e-05	3
Cluster-130982.5	8.70027	up	K00975	ko00500,ko00520,ko01100,ko01110,ko01250	IAA-Asp	2.79692	up	Indole-3-acetyl-L-aspartic acid	--	--	0.809448	4.7144e-05	3
Cluster-131286.0	1.79374	insig	--	--	IAA-Asp	2.79692	up	Indole-3-acetyl-L-aspartic acid	--	--	0.828996	2.11779e-05	3
Cluster-131347.7	2.86885	up	--	--	IAA-Asp	2.79692	up	Indole-3-acetyl-L-aspartic acid	--	--	0.830795	1.95765e-05	3
Cluster-131355.14	7.01695	up	--	--	IAA-Asp	2.79692	up	Indole-3-acetyl-L-aspartic acid	--	--	0.821021	2.9692e-05	3
Cluster-131355.3	1.46022	up	--	--	IAA-Asp	2.79692	up	Indole-3-acetyl-L-aspartic acid	--	--	0.889121	8.06881e-07	3
Cluster-131421.6	2.825	up	--	--	IAA-Asp	2.79692	up	Indole-3-acetyl-L-aspartic acid	--	--	0.895871	4.99041e-07	3
Cluster-131676.4	2.17572	up	K01179	ko00500,ko01100	IAA-Asp	2.79692	up	Indole-3-acetyl-L-aspartic acid	--	--	0.825258	2.4864e-05	3
Cluster-131838.1	1.61779	insig	--	--	IAA-Asp	2.79692	up	Indole-3-acetyl-L-aspartic acid	--	--	0.809327	4.73654e-05	3
Cluster-132193.0	1.41047	up	--	--	IAA-Asp	2.79692	up	Indole-3-acetyl-L-aspartic acid	--	--	0.965456	9.14867e-11	3
Cluster-132248.0	7.13523	up	K22374	ko00999,ko01100,ko01110	IAA-Asp	2.79692	up	Indole-3-acetyl-L-aspartic acid	--	--	0.80525	5.53334e-05	3
Cluster-132388.1	5.13675	up	K07937	ko04144	IAA-Asp	2.79692	up	Indole-3-acetyl-L-aspartic acid	--	--	0.860018	4.73321e-06	3
Cluster-132601.3	4.84828	up	--	--	IAA-Asp	2.79692	up	Indole-3-acetyl-L-aspartic acid	--	--	0.891222	6.97152e-07	3
Cluster-132618.1	7.26224	up	--	--	IAA-Asp	2.79692	up	Indole-3-acetyl-L-aspartic acid	--	--	0.806599	5.2578e-05	3
Cluster-132694.1	8.92184	up	--	--	IAA-Asp	2.79692	up	Indole-3-acetyl-L-aspartic acid	--	--	0.841009	1.23083e-05	3
Cluster-132706.1	6.46192	up	K15777	ko00965,ko01110	IAA-Asp	2.79692	up	Indole-3-acetyl-L-aspartic acid	--	--	0.822994	2.73524e-05	3
Cluster-132995.6	8.6438	up	--	--	IAA-Asp	2.79692	up	Indole-3-acetyl-L-aspartic acid	--	--	0.809355	4.73133e-05	3
Cluster-133010.2	10.4665	up	--	--	IAA-Asp	2.79692	up	Indole-3-acetyl-L-aspartic acid	--	--	0.829623	2.06074e-05	3
Cluster-133113.5	1.46798	up	--	--	IAA-Asp	2.79692	up	Indole-3-acetyl-L-aspartic acid	--	--	0.933426	1.57253e-08	3
Cluster-133336.4	7.65945	up	--	--	IAA-Asp	2.79692	up	Indole-3-acetyl-L-aspartic acid	--	--	0.829977	2.0291e-05	3
Cluster-133559.1	1.75342	up	--	--	IAA-Asp	2.79692	up	Indole-3-acetyl-L-aspartic acid	--	--	0.874232	2.10589e-06	3
Cluster-133750.4	1.24975	up	--	--	IAA-Asp	2.79692	up	Indole-3-acetyl-L-aspartic acid	--	--	0.822012	2.84961e-05	3
Cluster-133788.8	5.45158	up	--	--	IAA-Asp	2.79692	up	Indole-3-acetyl-L-aspartic acid	--	--	0.82253	2.78886e-05	3
Cluster-134379.1	6.48858	up	K00430	ko00940,ko01100,ko01110	IAA-Asp	2.79692	up	Indole-3-acetyl-L-aspartic acid	--	--	0.834017	1.69671e-05	3
Cluster-134509.6	3.29684	up	--	--	IAA-Asp	2.79692	up	Indole-3-acetyl-L-aspartic acid	--	--	0.851828	7.26025e-06	3
Cluster-134717.3	1.05732	up	--	--	IAA-Asp	2.79692	up	Indole-3-acetyl-L-aspartic acid	--	--	0.864129	3.77975e-06	3
Cluster-134821.3	3.28582	up	K22845	ko00941,ko01110	IAA-Asp	2.79692	up	Indole-3-acetyl-L-aspartic acid	--	--	0.802925	6.03668e-05	3
Cluster-134860.0	4.58064	up	--	--	IAA-Asp	2.79692	up	Indole-3-acetyl-L-aspartic acid	--	--	0.837503	1.44853e-05	3
Cluster-135036.4	7.48921	up	--	--	IAA-Asp	2.79692	up	Indole-3-acetyl-L-aspartic acid	--	--	0.814628	3.84812e-05	3
Cluster-135046.3	2.28856	up	K01870	ko00970	IAA-Asp	2.79692	up	Indole-3-acetyl-L-aspartic acid	--	--	0.836409	1.52282e-05	3
Cluster-135061.2	1.1989	up	--	--	IAA-Asp	2.79692	up	Indole-3-acetyl-L-aspartic acid	--	--	0.931405	1.98469e-08	3
Cluster-135137.2	7.15024	up	K20772	ko00270,ko01100,ko01110,ko04016	IAA-Asp	2.79692	up	Indole-3-acetyl-L-aspartic acid	--	--	0.829123	2.10612e-05	3
Cluster-135137.7	3.42856	up	K20772	ko00270,ko01100,ko01110,ko04016	IAA-Asp	2.79692	up	Indole-3-acetyl-L-aspartic acid	--	--	0.857863	5.31055e-06	3
Cluster-135344.3	1.41248	up	K13648	ko00520,ko01100	IAA-Asp	2.79692	up	Indole-3-acetyl-L-aspartic acid	--	--	0.908738	1.81128e-07	3
Cluster-135454.7	2.20907	up	--	--	IAA-Asp	2.79692	up	Indole-3-acetyl-L-aspartic acid	--	--	0.858871	5.03331e-06	3
Cluster-135454.8	1.28497	up	--	--	IAA-Asp	2.79692	up	Indole-3-acetyl-L-aspartic acid	--	--	0.901884	3.16199e-07	3
Cluster-14027.0	7.9788	up	K13496	ko00908,ko01110	IAA-Asp	2.79692	up	Indole-3-acetyl-L-aspartic acid	--	--	0.820857	2.98939e-05	3
Cluster-14977.3	10.6297	up	K10775	ko00360,ko00940,ko01100,ko01110	IAA-Asp	2.79692	up	Indole-3-acetyl-L-aspartic acid	--	--	0.814654	3.84407e-05	3
Cluster-17536.12	3.59921	up	--	--	IAA-Asp	2.79692	up	Indole-3-acetyl-L-aspartic acid	--	--	0.827824	2.22794e-05	3
Cluster-17536.29	6.91011	up	--	--	IAA-Asp	2.79692	up	Indole-3-acetyl-L-aspartic acid	--	--	0.822129	2.83577e-05	3
Cluster-17536.30	2.40558	up	--	--	IAA-Asp	2.79692	up	Indole-3-acetyl-L-aspartic acid	--	--	0.826281	2.3804e-05	3
Cluster-19208.12	11.8688	up	--	--	IAA-Asp	2.79692	up	Indole-3-acetyl-L-aspartic acid	--	--	0.818191	3.33443e-05	3
Cluster-19626.1	7.64837	up	--	--	IAA-Asp	2.79692	up	Indole-3-acetyl-L-aspartic acid	--	--	0.815961	3.64862e-05	3
Cluster-1970.114	8.98484	up	--	--	IAA-Asp	2.79692	up	Indole-3-acetyl-L-aspartic acid	--	--	0.800218	6.67149e-05	3
Cluster-1970.119	10.4127	up	--	--	IAA-Asp	2.79692	up	Indole-3-acetyl-L-aspartic acid	--	--	0.807018	5.17475e-05	3
Cluster-1970.120	6.49077	up	--	--	IAA-Asp	2.79692	up	Indole-3-acetyl-L-aspartic acid	--	--	0.842517	1.14625e-05	3
Cluster-1970.26	8.1497	up	--	--	IAA-Asp	2.79692	up	Indole-3-acetyl-L-aspartic acid	--	--	0.836925	1.48733e-05	3
Cluster-1970.38	6.92655	up	--	--	IAA-Asp	2.79692	up	Indole-3-acetyl-L-aspartic acid	--	--	0.844007	1.06755e-05	3
Cluster-1970.39	8.1246	up	--	--	IAA-Asp	2.79692	up	Indole-3-acetyl-L-aspartic acid	--	--	0.843749	1.08084e-05	3
Cluster-1970.66	8.18137	up	--	--	IAA-Asp	2.79692	up	Indole-3-acetyl-L-aspartic acid	--	--	0.836536	1.51404e-05	3
Cluster-1970.68	4.69498	up	--	--	IAA-Asp	2.79692	up	Indole-3-acetyl-L-aspartic acid	--	--	0.84188	1.18134e-05	3
Cluster-1970.69	6.31433	up	--	--	IAA-Asp	2.79692	up	Indole-3-acetyl-L-aspartic acid	--	--	0.813216	4.06949e-05	3
Cluster-1970.73	5.82652	up	--	--	IAA-Asp	2.79692	up	Indole-3-acetyl-L-aspartic acid	--	--	0.835958	1.55439e-05	3
Cluster-1970.76	1.55766	up	--	--	IAA-Asp	2.79692	up	Indole-3-acetyl-L-aspartic acid	--	--	0.858983	5.00342e-06	3
Cluster-1970.77	1.8331	up	--	--	IAA-Asp	2.79692	up	Indole-3-acetyl-L-aspartic acid	--	--	0.852171	7.13504e-06	3
Cluster-1970.78	8.17246	up	--	--	IAA-Asp	2.79692	up	Indole-3-acetyl-L-aspartic acid	--	--	0.834242	1.67969e-05	3
Cluster-1970.80	8.126	up	--	--	IAA-Asp	2.79692	up	Indole-3-acetyl-L-aspartic acid	--	--	0.835497	1.58723e-05	3
Cluster-1970.81	1.7029	up	--	--	IAA-Asp	2.79692	up	Indole-3-acetyl-L-aspartic acid	--	--	0.840731	1.24705e-05	3
Cluster-1970.82	10.7939	up	--	--	IAA-Asp	2.79692	up	Indole-3-acetyl-L-aspartic acid	--	--	0.83062	1.97275e-05	3
Cluster-1970.98	5.6623	up	--	--	IAA-Asp	2.79692	up	Indole-3-acetyl-L-aspartic acid	--	--	0.839029	1.35003e-05	3
Cluster-21512.0	6.83003	up	--	--	IAA-Asp	2.79692	up	Indole-3-acetyl-L-aspartic acid	--	--	0.833899	1.70577e-05	3
Cluster-22399.10	2.06451	up	--	--	IAA-Asp	2.79692	up	Indole-3-acetyl-L-aspartic acid	--	--	0.848106	8.74561e-06	3
Cluster-22399.23	1.50911	up	--	--	IAA-Asp	2.79692	up	Indole-3-acetyl-L-aspartic acid	--	--	0.860732	4.55414e-06	3
Cluster-22500.6	1.18468	up	K13382	ko00950,ko01100,ko01110	IAA-Asp	2.79692	up	Indole-3-acetyl-L-aspartic acid	--	--	0.83888	1.35936e-05	3
Cluster-22781.11	6.57841	up	--	--	IAA-Asp	2.79692	up	Indole-3-acetyl-L-aspartic acid	--	--	0.801434	6.37964e-05	3
Cluster-23255.2	12.2426	up	K07936	ko03008,ko03013,ko03250	IAA-Asp	2.79692	up	Indole-3-acetyl-L-aspartic acid	--	--	0.822656	2.77422e-05	3
Cluster-23255.8	9.85207	up	--	--	IAA-Asp	2.79692	up	Indole-3-acetyl-L-aspartic acid	--	--	0.809114	4.77554e-05	3
Cluster-23268.6	5.56423	up	--	--	IAA-Asp	2.79692	up	Indole-3-acetyl-L-aspartic acid	--	--	0.803991	5.80134e-05	3
Cluster-23316.10	11.1137	up	K01611	ko00270,ko00330,ko01100	IAA-Asp	2.79692	up	Indole-3-acetyl-L-aspartic acid	--	--	0.842402	1.15252e-05	3
Cluster-23316.13	5.48777	up	K01611	ko00270,ko00330,ko01100	IAA-Asp	2.79692	up	Indole-3-acetyl-L-aspartic acid	--	--	0.848508	8.57346e-06	3
Cluster-23316.3	9.81866	up	K01611	ko00270,ko00330,ko01100	IAA-Asp	2.79692	up	Indole-3-acetyl-L-aspartic acid	--	--	0.834241	1.67978e-05	3
Cluster-26158.3	13.2868	up	--	--	IAA-Asp	2.79692	up	Indole-3-acetyl-L-aspartic acid	--	--	0.81352	4.02101e-05	3
Cluster-26158.4	7.83998	up	--	--	IAA-Asp	2.79692	up	Indole-3-acetyl-L-aspartic acid	--	--	0.810064	4.60346e-05	3
Cluster-26574.8	2.49285	up	--	--	IAA-Asp	2.79692	up	Indole-3-acetyl-L-aspartic acid	--	--	0.817467	3.43371e-05	3
Cluster-26791.93	1.95158	up	K17725	ko00920,ko01100	IAA-Asp	2.79692	up	Indole-3-acetyl-L-aspartic acid	--	--	0.802504	6.13199e-05	3
Cluster-26806.9	3.90216	up	K16225	ko04626	IAA-Asp	2.79692	up	Indole-3-acetyl-L-aspartic acid	--	--	0.818473	3.29633e-05	3
Cluster-26956.1	1.73966	up	--	--	IAA-Asp	2.79692	up	Indole-3-acetyl-L-aspartic acid	--	--	0.865535	3.4942e-06	3
Cluster-27239.1	8.48732	up	--	--	IAA-Asp	2.79692	up	Indole-3-acetyl-L-aspartic acid	--	--	0.812103	4.25169e-05	3
Cluster-27707.8	8.26135	up	--	--	IAA-Asp	2.79692	up	Indole-3-acetyl-L-aspartic acid	--	--	0.820466	3.03797e-05	3
Cluster-27716.12	1.3559	up	K01535	ko00190,ko01100	IAA-Asp	2.79692	up	Indole-3-acetyl-L-aspartic acid	--	--	0.863684	3.87427e-06	3
Cluster-27716.25	1.17624	insig	K01535	ko00190,ko01100	IAA-Asp	2.79692	up	Indole-3-acetyl-L-aspartic acid	--	--	0.891299	6.93375e-07	3
Cluster-28119.0	6.48943	up	--	--	IAA-Asp	2.79692	up	Indole-3-acetyl-L-aspartic acid	--	--	0.826954	2.31282e-05	3
Cluster-28376.1	3.41241	up	K10526	ko00592,ko01100,ko01110	IAA-Asp	2.79692	up	Indole-3-acetyl-L-aspartic acid	--	--	0.927124	3.17721e-08	3
Cluster-28684.37	1.26142	up	K03283	ko03040,ko04141,ko04144	IAA-Asp	2.79692	up	Indole-3-acetyl-L-aspartic acid	--	--	0.828284	2.18411e-05	3
Cluster-29118.14	12.1911	up	--	--	IAA-Asp	2.79692	up	Indole-3-acetyl-L-aspartic acid	--	--	0.831423	1.90425e-05	3
Cluster-29118.16	15.8651	up	--	--	IAA-Asp	2.79692	up	Indole-3-acetyl-L-aspartic acid	--	--	0.814667	3.84216e-05	3
Cluster-29118.31	8.94973	up	--	--	IAA-Asp	2.79692	up	Indole-3-acetyl-L-aspartic acid	--	--	0.808874	4.8198e-05	3
Cluster-29118.32	10.097	up	--	--	IAA-Asp	2.79692	up	Indole-3-acetyl-L-aspartic acid	--	--	0.81857	3.28333e-05	3
Cluster-29118.34	10.0009	up	--	--	IAA-Asp	2.79692	up	Indole-3-acetyl-L-aspartic acid	--	--	0.832158	1.84338e-05	3
Cluster-29333.0	6.51937	up	--	--	IAA-Asp	2.79692	up	Indole-3-acetyl-L-aspartic acid	--	--	0.80878	4.83739e-05	3
Cluster-29557.2	1.31529	up	--	--	IAA-Asp	2.79692	up	Indole-3-acetyl-L-aspartic acid	--	--	0.824309	2.58826e-05	3
Cluster-29680.0	6.75866	up	--	--	IAA-Asp	2.79692	up	Indole-3-acetyl-L-aspartic acid	--	--	0.813437	4.03418e-05	3
Cluster-29853.11	5.8742	up	--	--	IAA-Asp	2.79692	up	Indole-3-acetyl-L-aspartic acid	--	--	0.841445	1.20583e-05	3
Cluster-30759.31	1.47593	up	--	--	IAA-Asp	2.79692	up	Indole-3-acetyl-L-aspartic acid	--	--	0.827212	2.28743e-05	3
Cluster-30835.6	4.97983	up	--	--	IAA-Asp	2.79692	up	Indole-3-acetyl-L-aspartic acid	--	--	0.819493	3.16193e-05	3
Cluster-30835.9	9.73922	up	--	--	IAA-Asp	2.79692	up	Indole-3-acetyl-L-aspartic acid	--	--	0.814474	3.87182e-05	3
Cluster-31771.3	7.15409	up	--	--	IAA-Asp	2.79692	up	Indole-3-acetyl-L-aspartic acid	--	--	0.844942	1.02062e-05	3
Cluster-31771.4	7.5342	up	--	--	IAA-Asp	2.79692	up	Indole-3-acetyl-L-aspartic acid	--	--	0.804643	5.66116e-05	3
Cluster-3193.16	1.32545	up	--	--	IAA-Asp	2.79692	up	Indole-3-acetyl-L-aspartic acid	--	--	0.866984	3.21946e-06	3
Cluster-32784.4	2.57239	up	--	--	IAA-Asp	2.79692	up	Indole-3-acetyl-L-aspartic acid	--	--	0.856896	5.58862e-06	3
Cluster-34083.99	2.17404	up	--	--	IAA-Asp	2.79692	up	Indole-3-acetyl-L-aspartic acid	--	--	0.892053	6.57439e-07	3
Cluster-34453.10	3.47829	up	K13466	ko04626	IAA-Asp	2.79692	up	Indole-3-acetyl-L-aspartic acid	--	--	0.875015	2.00839e-06	3
Cluster-34585.2	2.41701	up	--	--	IAA-Asp	2.79692	up	Indole-3-acetyl-L-aspartic acid	--	--	0.923466	4.64629e-08	3
Cluster-35850.234	1.06375	up	K00430	ko00940,ko01100,ko01110	IAA-Asp	2.79692	up	Indole-3-acetyl-L-aspartic acid	--	--	0.836721	1.50132e-05	3
Cluster-3587.18	3.57911	up	--	--	IAA-Asp	2.79692	up	Indole-3-acetyl-L-aspartic acid	--	--	0.874598	2.05992e-06	3
Cluster-3587.19	8.97696	up	--	--	IAA-Asp	2.79692	up	Indole-3-acetyl-L-aspartic acid	--	--	0.842362	1.15469e-05	3
Cluster-3587.28	8.01223	up	--	--	IAA-Asp	2.79692	up	Indole-3-acetyl-L-aspartic acid	--	--	0.843401	1.09896e-05	3
Cluster-36143.12	7.77225	up	--	--	IAA-Asp	2.79692	up	Indole-3-acetyl-L-aspartic acid	--	--	0.819637	3.14325e-05	3
Cluster-36143.3	3.21686	up	--	--	IAA-Asp	2.79692	up	Indole-3-acetyl-L-aspartic acid	--	--	0.823494	2.67854e-05	3
Cluster-37560.31	2.37509	up	--	--	IAA-Asp	2.79692	up	Indole-3-acetyl-L-aspartic acid	--	--	0.805611	5.45831e-05	3
Cluster-37883.35	3.62095	up	K02433	ko00970,ko01100	IAA-Asp	2.79692	up	Indole-3-acetyl-L-aspartic acid	--	--	0.847759	8.89649e-06	3
Cluster-37883.36	1.69012	up	K13993	ko04141	IAA-Asp	2.79692	up	Indole-3-acetyl-L-aspartic acid	--	--	0.941748	5.54845e-09	3
Cluster-39731.1	5.31787	up	K13447	ko04016,ko04626	IAA-Asp	2.79692	up	Indole-3-acetyl-L-aspartic acid	--	--	0.837105	1.4752e-05	3
Cluster-3981.0	3.40249	up	--	--	IAA-Asp	2.79692	up	Indole-3-acetyl-L-aspartic acid	--	--	0.815688	3.68869e-05	3
Cluster-39897.7	8.35563	up	--	--	IAA-Asp	2.79692	up	Indole-3-acetyl-L-aspartic acid	--	--	0.802086	6.22768e-05	3
Cluster-40342.10	7.94469	up	K01904	ko00130,ko00940,ko01100,ko01110	IAA-Asp	2.79692	up	Indole-3-acetyl-L-aspartic acid	--	--	0.807262	5.12694e-05	3
Cluster-40810.28	3.88281	up	--	--	IAA-Asp	2.79692	up	Indole-3-acetyl-L-aspartic acid	--	--	0.854244	6.41648e-06	3
Cluster-40876.14	3.67109	up	--	--	IAA-Asp	2.79692	up	Indole-3-acetyl-L-aspartic acid	--	--	0.965594	8.86292e-11	3
Cluster-40925.8	6.45823	up	--	--	IAA-Asp	2.79692	up	Indole-3-acetyl-L-aspartic acid	--	--	0.801812	6.29126e-05	3
Cluster-41166.5	3.174	up	--	--	IAA-Asp	2.79692	up	Indole-3-acetyl-L-aspartic acid	--	--	0.84547	9.9487e-06	3
Cluster-41174.8	3.63402	up	--	--	IAA-Asp	2.79692	up	Indole-3-acetyl-L-aspartic acid	--	--	0.841834	1.18392e-05	3
Cluster-41290.2	8.16352	up	--	--	IAA-Asp	2.79692	up	Indole-3-acetyl-L-aspartic acid	--	--	0.831153	1.92711e-05	3
Cluster-41361.5	2.36931	up	--	--	IAA-Asp	2.79692	up	Indole-3-acetyl-L-aspartic acid	--	--	0.904241	2.62291e-07	3
Cluster-41361.9	2.61179	up	--	--	IAA-Asp	2.79692	up	Indole-3-acetyl-L-aspartic acid	--	--	0.930758	2.13493e-08	3
Cluster-41446.4	8.65557	up	--	--	IAA-Asp	2.79692	up	Indole-3-acetyl-L-aspartic acid	--	--	0.820366	3.05051e-05	3
Cluster-42436.0	6.57923	up	--	--	IAA-Asp	2.79692	up	Indole-3-acetyl-L-aspartic acid	--	--	0.854207	6.42876e-06	3
Cluster-43048.0	7.59166	up	--	--	IAA-Asp	2.79692	up	Indole-3-acetyl-L-aspartic acid	--	--	0.892589	6.32864e-07	3
Cluster-43684.3	2.24018	up	K05666	ko02010	IAA-Asp	2.79692	up	Indole-3-acetyl-L-aspartic acid	--	--	0.838506	1.38314e-05	3
Cluster-43756.5	6.79144	up	--	--	IAA-Asp	2.79692	up	Indole-3-acetyl-L-aspartic acid	--	--	0.801577	6.34616e-05	3
Cluster-43845.2	1.5438	up	K14504	ko04075	IAA-Asp	2.79692	up	Indole-3-acetyl-L-aspartic acid	--	--	0.956221	5.91286e-10	3
Cluster-44310.0	6.66403	up	--	--	IAA-Asp	2.79692	up	Indole-3-acetyl-L-aspartic acid	--	--	0.854936	6.1911e-06	3
Cluster-44381.10	1.279	up	--	--	IAA-Asp	2.79692	up	Indole-3-acetyl-L-aspartic acid	--	--	0.944489	3.80649e-09	3
Cluster-44381.13	8.4438	up	--	--	IAA-Asp	2.79692	up	Indole-3-acetyl-L-aspartic acid	--	--	0.817216	3.46884e-05	3
Cluster-44381.8	1.98262	up	--	--	IAA-Asp	2.79692	up	Indole-3-acetyl-L-aspartic acid	--	--	0.925312	3.84481e-08	3
Cluster-44381.9	2.20727	up	--	--	IAA-Asp	2.79692	up	Indole-3-acetyl-L-aspartic acid	--	--	0.918246	7.74561e-08	3
Cluster-44659.0	6.48693	up	K05894	ko00592,ko01100,ko01110	IAA-Asp	2.79692	up	Indole-3-acetyl-L-aspartic acid	--	--	0.881045	1.3792e-06	3
Cluster-44677.0	7.09394	up	K10260	ko04120	IAA-Asp	2.79692	up	Indole-3-acetyl-L-aspartic acid	--	--	0.924176	4.32236e-08	3
Cluster-44822.10	8.99782	up	K13435	ko04626	IAA-Asp	2.79692	up	Indole-3-acetyl-L-aspartic acid	--	--	0.814287	3.90058e-05	3
Cluster-44822.3	8.09575	up	K13435	ko04626	IAA-Asp	2.79692	up	Indole-3-acetyl-L-aspartic acid	--	--	0.817258	3.46296e-05	3
Cluster-4517.13	7.36336	up	--	--	IAA-Asp	2.79692	up	Indole-3-acetyl-L-aspartic acid	--	--	0.844005	1.06769e-05	3
Cluster-45392.3	1.75977	up	K01859	ko00941,ko01100,ko01110	IAA-Asp	2.79692	up	Indole-3-acetyl-L-aspartic acid	--	--	0.921741	5.52255e-08	3
Cluster-45548.5	7.01656	up	--	--	IAA-Asp	2.79692	up	Indole-3-acetyl-L-aspartic acid	--	--	0.841232	1.21799e-05	3
Cluster-45548.8	7.09572	up	--	--	IAA-Asp	2.79692	up	Indole-3-acetyl-L-aspartic acid	--	--	0.832311	1.83097e-05	3
Cluster-4560.4	6.5694	up	K00430	ko00940,ko01100,ko01110	IAA-Asp	2.79692	up	Indole-3-acetyl-L-aspartic acid	--	--	0.816556	3.56236e-05	3
Cluster-45904.4	7.54895	up	--	--	IAA-Asp	2.79692	up	Indole-3-acetyl-L-aspartic acid	--	--	0.859053	4.98457e-06	3
Cluster-45979.0	8.57664	up	--	--	IAA-Asp	2.79692	up	Indole-3-acetyl-L-aspartic acid	--	--	0.830415	1.99056e-05	3
Cluster-46112.0	8.08124	up	--	--	IAA-Asp	2.79692	up	Indole-3-acetyl-L-aspartic acid	--	--	0.918809	7.34209e-08	3
Cluster-47070.5	2.85084	up	--	--	IAA-Asp	2.79692	up	Indole-3-acetyl-L-aspartic acid	--	--	0.900965	3.39657e-07	3
Cluster-47070.7	9.61599	up	--	--	IAA-Asp	2.79692	up	Indole-3-acetyl-L-aspartic acid	--	--	0.831491	1.89857e-05	3
Cluster-47085.2	6.83649	up	--	--	IAA-Asp	2.79692	up	Indole-3-acetyl-L-aspartic acid	--	--	0.873113	2.25232e-06	3
Cluster-47161.5	2.21699	up	--	--	IAA-Asp	2.79692	up	Indole-3-acetyl-L-aspartic acid	--	--	0.807222	5.1346e-05	3
Cluster-47161.7	4.61002	up	--	--	IAA-Asp	2.79692	up	Indole-3-acetyl-L-aspartic acid	--	--	0.820498	3.03404e-05	3
Cluster-47305.5	9.47329	up	K01051	ko00040,ko01100	IAA-Asp	2.79692	up	Indole-3-acetyl-L-aspartic acid	--	--	0.832627	1.80541e-05	3
Cluster-47589.125	1.04407	up	K08770	ko04120	IAA-Asp	2.79692	up	Indole-3-acetyl-L-aspartic acid	--	--	0.801988	6.25035e-05	3
Cluster-47894.3	2.56589	up	K12471	ko04144	IAA-Asp	2.79692	up	Indole-3-acetyl-L-aspartic acid	--	--	0.847391	9.05885e-06	3
Cluster-48333.1	7.63434	up	--	--	IAA-Asp	2.79692	up	Indole-3-acetyl-L-aspartic acid	--	--	0.809943	4.62502e-05	3
Cluster-49076.23	5.00187	up	--	--	IAA-Asp	2.79692	up	Indole-3-acetyl-L-aspartic acid	--	--	0.809868	4.63851e-05	3
Cluster-49412.5	1.18736	up	K13412	ko04626	IAA-Asp	2.79692	up	Indole-3-acetyl-L-aspartic acid	--	--	0.835033	1.62087e-05	3
Cluster-50251.5	6.51787	up	--	--	IAA-Asp	2.79692	up	Indole-3-acetyl-L-aspartic acid	--	--	0.81563	3.69727e-05	3
Cluster-50292.9	8.45741	up	--	--	IAA-Asp	2.79692	up	Indole-3-acetyl-L-aspartic acid	--	--	0.802222	6.19648e-05	3
Cluster-51620.5	1.13998	up	--	--	IAA-Asp	2.79692	up	Indole-3-acetyl-L-aspartic acid	--	--	0.877218	1.75473e-06	3
Cluster-53655.2	1.97815	insig	--	--	IAA-Asp	2.79692	up	Indole-3-acetyl-L-aspartic acid	--	--	0.836293	1.53088e-05	3
Cluster-53788.16	2.36185	up	K12818	ko03040	IAA-Asp	2.79692	up	Indole-3-acetyl-L-aspartic acid	--	--	0.886976	9.34027e-07	3
Cluster-53929.2	4.25112	up	K00423	ko00053,ko01100	IAA-Asp	2.79692	up	Indole-3-acetyl-L-aspartic acid	--	--	0.863052	4.01211e-06	3
Cluster-53929.5	5.78394	up	K00423	ko00053,ko01100	IAA-Asp	2.79692	up	Indole-3-acetyl-L-aspartic acid	--	--	0.943208	4.54964e-09	3
Cluster-54162.0	4.17897	up	--	--	IAA-Asp	2.79692	up	Indole-3-acetyl-L-aspartic acid	--	--	0.889018	8.12613e-07	3
Cluster-54346.0	6.33398	up	K01193	ko00052,ko00500,ko01100,ko01110	IAA-Asp	2.79692	up	Indole-3-acetyl-L-aspartic acid	--	--	0.874406	2.08392e-06	3
Cluster-55165.7	5.43417	up	--	--	IAA-Asp	2.79692	up	Indole-3-acetyl-L-aspartic acid	--	--	0.821274	2.93829e-05	3
Cluster-56547.6	6.73914	up	--	--	IAA-Asp	2.79692	up	Indole-3-acetyl-L-aspartic acid	--	--	0.817474	3.43285e-05	3
Cluster-57229.2	3.59119	up	K20716	ko04016	IAA-Asp	2.79692	up	Indole-3-acetyl-L-aspartic acid	--	--	0.901324	3.30319e-07	3
Cluster-57554.6	1.88144	up	--	--	IAA-Asp	2.79692	up	Indole-3-acetyl-L-aspartic acid	--	--	0.827475	2.26165e-05	3
Cluster-58047.8	7.36386	up	--	--	IAA-Asp	2.79692	up	Indole-3-acetyl-L-aspartic acid	--	--	0.800915	6.50284e-05	3
Cluster-58361.4	8.9404	up	--	--	IAA-Asp	2.79692	up	Indole-3-acetyl-L-aspartic acid	--	--	0.830914	1.94751e-05	3
Cluster-58407.1	2.46689	up	K14494	ko04075	IAA-Asp	2.79692	up	Indole-3-acetyl-L-aspartic acid	--	--	0.921525	5.64157e-08	3
Cluster-59225.13	8.48887	up	--	--	IAA-Asp	2.79692	up	Indole-3-acetyl-L-aspartic acid	--	--	0.806354	5.30705e-05	3
Cluster-59420.2	1.87018	up	--	--	IAA-Asp	2.79692	up	Indole-3-acetyl-L-aspartic acid	--	--	0.923455	4.65168e-08	3
Cluster-59420.41	2.43986	up	K00020	ko00280,ko01100	IAA-Asp	2.79692	up	Indole-3-acetyl-L-aspartic acid	--	--	0.837647	1.43894e-05	3
Cluster-60220.3	2.98649	up	--	--	IAA-Asp	2.79692	up	Indole-3-acetyl-L-aspartic acid	--	--	0.920539	6.21491e-08	3
Cluster-60394.3	8.66929	up	--	--	IAA-Asp	2.79692	up	Indole-3-acetyl-L-aspartic acid	--	--	0.80422	5.75167e-05	3
Cluster-60394.5	2.16575	up	--	--	IAA-Asp	2.79692	up	Indole-3-acetyl-L-aspartic acid	--	--	0.966114	7.86016e-11	3
Cluster-60394.7	7.42858	up	--	--	IAA-Asp	2.79692	up	Indole-3-acetyl-L-aspartic acid	--	--	0.805744	5.43112e-05	3
Cluster-60505.1	1.65168	up	K01583	ko00330,ko01100	IAA-Asp	2.79692	up	Indole-3-acetyl-L-aspartic acid	--	--	0.842852	1.12811e-05	3
Cluster-60505.3	2.2218	up	K01583	ko00330,ko01100	IAA-Asp	2.79692	up	Indole-3-acetyl-L-aspartic acid	--	--	0.884925	1.07135e-06	3
Cluster-60646.2	2.05888	up	K01087	ko00500,ko01100,ko01110	IAA-Asp	2.79692	up	Indole-3-acetyl-L-aspartic acid	--	--	0.899094	3.92129e-07	3
Cluster-60898.2	5.67213	up	--	--	IAA-Asp	2.79692	up	Indole-3-acetyl-L-aspartic acid	--	--	0.810559	4.51587e-05	3
Cluster-61268.2	2.87886	up	K01456	ko04141	IAA-Asp	2.79692	up	Indole-3-acetyl-L-aspartic acid	--	--	0.898131	4.21771e-07	3
Cluster-61280.4	8.38428	up	K10956	ko03060,ko04141,ko04145	IAA-Asp	2.79692	up	Indole-3-acetyl-L-aspartic acid	--	--	0.804564	5.67791e-05	3
Cluster-61369.0	8.02491	up	--	--	IAA-Asp	2.79692	up	Indole-3-acetyl-L-aspartic acid	--	--	0.842325	1.15674e-05	3
Cluster-61974.1	7.84358	up	--	--	IAA-Asp	2.79692	up	Indole-3-acetyl-L-aspartic acid	--	--	0.805628	5.45487e-05	3
Cluster-61974.11	3.76533	up	--	--	IAA-Asp	2.79692	up	Indole-3-acetyl-L-aspartic acid	--	--	0.829196	2.09941e-05	3
Cluster-61974.13	7.42064	up	--	--	IAA-Asp	2.79692	up	Indole-3-acetyl-L-aspartic acid	--	--	0.850058	7.93684e-06	3
Cluster-61974.18	11.7461	up	--	--	IAA-Asp	2.79692	up	Indole-3-acetyl-L-aspartic acid	--	--	0.814583	3.85498e-05	3
Cluster-61974.2	7.64871	up	--	--	IAA-Asp	2.79692	up	Indole-3-acetyl-L-aspartic acid	--	--	0.812212	4.23359e-05	3
Cluster-61974.20	11.6104	up	--	--	IAA-Asp	2.79692	up	Indole-3-acetyl-L-aspartic acid	--	--	0.822971	2.73792e-05	3
Cluster-6217.30	5.31645	up	--	--	IAA-Asp	2.79692	up	Indole-3-acetyl-L-aspartic acid	--	--	0.826308	2.37774e-05	3
Cluster-62668.2	10.7181	up	K07151	ko00510,ko00513,ko01100,ko04141	IAA-Asp	2.79692	up	Indole-3-acetyl-L-aspartic acid	--	--	0.837938	1.41985e-05	3
Cluster-63008.0	2.2982	up	--	--	IAA-Asp	2.79692	up	Indole-3-acetyl-L-aspartic acid	--	--	0.902164	3.0933e-07	3
Cluster-63125.2	6.86194	up	--	--	IAA-Asp	2.79692	up	Indole-3-acetyl-L-aspartic acid	--	--	0.828373	2.17571e-05	3
Cluster-63179.0	3.14651	up	--	--	IAA-Asp	2.79692	up	Indole-3-acetyl-L-aspartic acid	--	--	0.806439	5.29002e-05	3
Cluster-63326.2	4.2852	up	--	--	IAA-Asp	2.79692	up	Indole-3-acetyl-L-aspartic acid	--	--	0.834438	1.66498e-05	3
Cluster-63553.4	7.27637	up	K13258	ko00943,ko01100,ko01110	IAA-Asp	2.79692	up	Indole-3-acetyl-L-aspartic acid	--	--	0.831725	1.87904e-05	3
Cluster-63620.0	3.11155	up	--	--	IAA-Asp	2.79692	up	Indole-3-acetyl-L-aspartic acid	--	--	0.822313	2.81416e-05	3
Cluster-63659.0	6.45711	up	--	--	IAA-Asp	2.79692	up	Indole-3-acetyl-L-aspartic acid	--	--	0.856745	5.63328e-06	3
Cluster-63765.2	6.42781	up	--	--	IAA-Asp	2.79692	up	Indole-3-acetyl-L-aspartic acid	--	--	0.835724	1.57098e-05	3
Cluster-63858.2	1.10767	up	K00645	ko00061,ko01100,ko01110,ko01212	IAA-Asp	2.79692	up	Indole-3-acetyl-L-aspartic acid	--	--	0.838861	1.36059e-05	3
Cluster-63949.6	7.94027	up	--	--	IAA-Asp	2.79692	up	Indole-3-acetyl-L-aspartic acid	--	--	0.82054	3.02876e-05	3
Cluster-6413.5	1.08527	up	--	--	IAA-Asp	2.79692	up	Indole-3-acetyl-L-aspartic acid	--	--	0.898884	3.98432e-07	3
Cluster-64203.2	3.09265	up	K23452	ko00908,ko01110	IAA-Asp	2.79692	up	Indole-3-acetyl-L-aspartic acid	--	--	0.874763	2.03938e-06	3
Cluster-64427.15	7.3124	up	--	--	IAA-Asp	2.79692	up	Indole-3-acetyl-L-aspartic acid	--	--	0.811019	4.43576e-05	3
Cluster-64427.6	1.85364	up	--	--	IAA-Asp	2.79692	up	Indole-3-acetyl-L-aspartic acid	--	--	0.930748	2.13727e-08	3
Cluster-64459.0	2.5266	up	K19476	ko04144	IAA-Asp	2.79692	up	Indole-3-acetyl-L-aspartic acid	--	--	0.985133	1.14571e-13	3
Cluster-64459.6	1.771	up	--	--	IAA-Asp	2.79692	up	Indole-3-acetyl-L-aspartic acid	--	--	0.947333	2.52179e-09	3
Cluster-64459.7	2.00163	up	K19476	ko04144	IAA-Asp	2.79692	up	Indole-3-acetyl-L-aspartic acid	--	--	0.840251	1.27539e-05	3
Cluster-64459.9	1.80965	up	--	--	IAA-Asp	2.79692	up	Indole-3-acetyl-L-aspartic acid	--	--	0.893493	5.93235e-07	3
Cluster-66055.1	6.6333	up	--	--	IAA-Asp	2.79692	up	Indole-3-acetyl-L-aspartic acid	--	--	0.811319	4.38415e-05	3
Cluster-66193.3	3.58464	up	--	--	IAA-Asp	2.79692	up	Indole-3-acetyl-L-aspartic acid	--	--	0.81457	3.85694e-05	3
Cluster-66218.8	1.07184	up	K13229	ko00402,ko01110	IAA-Asp	2.79692	up	Indole-3-acetyl-L-aspartic acid	--	--	0.841644	1.19456e-05	3
Cluster-66330.3	4.05165	up	--	--	IAA-Asp	2.79692	up	Indole-3-acetyl-L-aspartic acid	--	--	0.885785	1.01177e-06	3
Cluster-66427.3	1.65768	up	--	--	IAA-Asp	2.79692	up	Indole-3-acetyl-L-aspartic acid	--	--	0.955622	6.57877e-10	3
Cluster-66494.2	4.77917	up	--	--	IAA-Asp	2.79692	up	Indole-3-acetyl-L-aspartic acid	--	--	0.844645	1.0353e-05	3
Cluster-67119.0	2.36904	up	K01206	ko00511	IAA-Asp	2.79692	up	Indole-3-acetyl-L-aspartic acid	--	--	0.824116	2.60937e-05	3
Cluster-67336.8	6.71165	up	K22845	ko00941,ko01110	IAA-Asp	2.79692	up	Indole-3-acetyl-L-aspartic acid	--	--	0.803232	5.96815e-05	3
Cluster-67629.3	8.54683	up	K13464	ko04075	IAA-Asp	2.79692	up	Indole-3-acetyl-L-aspartic acid	--	--	0.825907	2.41873e-05	3
Cluster-67629.4	8.11795	up	K13464	ko04075	IAA-Asp	2.79692	up	Indole-3-acetyl-L-aspartic acid	--	--	0.829691	2.05465e-05	3
Cluster-67938.2	3.31153	up	K01184	ko00040,ko01100	IAA-Asp	2.79692	up	Indole-3-acetyl-L-aspartic acid	--	--	0.806461	5.28557e-05	3
Cluster-68469.2	2.43058	up	K15402	ko00073	IAA-Asp	2.79692	up	Indole-3-acetyl-L-aspartic acid	--	--	0.93124	2.02211e-08	3
Cluster-68482.8	7.33711	up	--	--	IAA-Asp	2.79692	up	Indole-3-acetyl-L-aspartic acid	--	--	0.845727	9.82568e-06	3
Cluster-69160.1	8.32031	up	--	--	IAA-Asp	2.79692	up	Indole-3-acetyl-L-aspartic acid	--	--	0.800853	6.51772e-05	3
Cluster-69453.6	7.1887	up	--	--	IAA-Asp	2.79692	up	Indole-3-acetyl-L-aspartic acid	--	--	0.813181	4.07512e-05	3
Cluster-69937.0	2.38205	up	--	--	IAA-Asp	2.79692	up	Indole-3-acetyl-L-aspartic acid	--	--	0.802052	6.23557e-05	3
Cluster-70185.5	9.84026	up	--	--	IAA-Asp	2.79692	up	Indole-3-acetyl-L-aspartic acid	--	--	0.80717	5.14493e-05	3
Cluster-70547.0	1.26075	insig	--	--	IAA-Asp	2.79692	up	Indole-3-acetyl-L-aspartic acid	--	--	0.93431	1.41697e-08	3
Cluster-70575.0	1.29254	up	--	--	IAA-Asp	2.79692	up	Indole-3-acetyl-L-aspartic acid	--	--	0.938018	9.00781e-09	3
Cluster-71068.0	1.58226	up	--	--	IAA-Asp	2.79692	up	Indole-3-acetyl-L-aspartic acid	--	--	0.832169	1.84248e-05	3
Cluster-71102.6	1.51036	up	--	--	IAA-Asp	2.79692	up	Indole-3-acetyl-L-aspartic acid	--	--	0.881722	1.32055e-06	3
Cluster-71225.4	8.22501	up	K14497	ko04016,ko04075	IAA-Asp	2.79692	up	Indole-3-acetyl-L-aspartic acid	--	--	0.833242	1.7566e-05	3
Cluster-71302.7	4.73417	up	--	--	IAA-Asp	2.79692	up	Indole-3-acetyl-L-aspartic acid	--	--	0.976208	4.79092e-12	3
Cluster-71689.4	8.68182	up	K00318	ko00330,ko01100,ko01110	IAA-Asp	2.79692	up	Indole-3-acetyl-L-aspartic acid	--	--	0.803923	5.81598e-05	3
Cluster-72515.1	6.68678	up	K14493	ko04075	IAA-Asp	2.79692	up	Indole-3-acetyl-L-aspartic acid	--	--	0.836427	1.5216e-05	3
Cluster-72515.2	3.6195	insig	K14493	ko04075	IAA-Asp	2.79692	up	Indole-3-acetyl-L-aspartic acid	--	--	0.833232	1.75742e-05	3
Cluster-72916.0	2.3962	up	--	--	IAA-Asp	2.79692	up	Indole-3-acetyl-L-aspartic acid	--	--	0.854614	6.29498e-06	3
Cluster-73109.1	7.01326	up	--	--	IAA-Asp	2.79692	up	Indole-3-acetyl-L-aspartic acid	--	--	0.839058	1.3482e-05	3
Cluster-73591.0	1.47451	up	--	--	IAA-Asp	2.79692	up	Indole-3-acetyl-L-aspartic acid	--	--	0.875339	1.96927e-06	3
Cluster-73623.0	4.67499	up	K20557	ko04016	IAA-Asp	2.79692	up	Indole-3-acetyl-L-aspartic acid	--	--	0.835155	1.61196e-05	3
Cluster-74681.0	3.31727	up	--	--	IAA-Asp	2.79692	up	Indole-3-acetyl-L-aspartic acid	--	--	0.882384	1.26531e-06	3
Cluster-75149.8	7.03218	up	--	--	IAA-Asp	2.79692	up	Indole-3-acetyl-L-aspartic acid	--	--	0.843895	1.07333e-05	3
Cluster-75592.0	6.51854	up	--	--	IAA-Asp	2.79692	up	Indole-3-acetyl-L-aspartic acid	--	--	0.828544	2.15965e-05	3
Cluster-76159.4	6.96096	up	K13422	ko04016,ko04075	IAA-Asp	2.79692	up	Indole-3-acetyl-L-aspartic acid	--	--	0.806675	5.24275e-05	3
Cluster-76930.0	3.99142	up	--	--	IAA-Asp	2.79692	up	Indole-3-acetyl-L-aspartic acid	--	--	0.844828	1.02622e-05	3
Cluster-77258.4	7.93652	up	--	--	IAA-Asp	2.79692	up	Indole-3-acetyl-L-aspartic acid	--	--	0.839302	1.33304e-05	3
Cluster-77481.5	7.67464	up	--	--	IAA-Asp	2.79692	up	Indole-3-acetyl-L-aspartic acid	--	--	0.821694	2.88756e-05	3
Cluster-77481.6	8.07594	up	--	--	IAA-Asp	2.79692	up	Indole-3-acetyl-L-aspartic acid	--	--	0.826724	2.33582e-05	3
Cluster-78230.2	7.7869	up	K14488	ko04075	IAA-Asp	2.79692	up	Indole-3-acetyl-L-aspartic acid	--	--	0.81219	4.23723e-05	3
Cluster-78363.0	2.5049	up	K15404	ko00073,ko01110	IAA-Asp	2.79692	up	Indole-3-acetyl-L-aspartic acid	--	--	0.964053	1.25229e-10	3
Cluster-79097.0	1.73706	up	--	--	IAA-Asp	2.79692	up	Indole-3-acetyl-L-aspartic acid	--	--	0.801623	6.3352e-05	3
Cluster-79257.1	3.02107	up	K00430	ko00940,ko01100,ko01110	IAA-Asp	2.79692	up	Indole-3-acetyl-L-aspartic acid	--	--	0.824632	2.55324e-05	3
Cluster-79339.0	1.71296	up	K00847	ko00051,ko00500,ko00520,ko01100,ko01110,ko01250	IAA-Asp	2.79692	up	Indole-3-acetyl-L-aspartic acid	--	--	0.809646	4.67844e-05	3
Cluster-79652.3	2.28933	up	--	--	IAA-Asp	2.79692	up	Indole-3-acetyl-L-aspartic acid	--	--	0.905772	2.31706e-07	3
Cluster-79988.1	1.54863	up	--	--	IAA-Asp	2.79692	up	Indole-3-acetyl-L-aspartic acid	--	--	0.810052	4.60544e-05	3
Cluster-80909.5	1.34941	up	K02160	ko00061,ko00620,ko00640,ko01100,ko01110,ko01200,ko01212	IAA-Asp	2.79692	up	Indole-3-acetyl-L-aspartic acid	--	--	0.870121	2.68737e-06	3
Cluster-81883.1	3.24867	up	--	--	IAA-Asp	2.79692	up	Indole-3-acetyl-L-aspartic acid	--	--	0.829401	2.08078e-05	3
Cluster-81883.3	8.30587	up	--	--	IAA-Asp	2.79692	up	Indole-3-acetyl-L-aspartic acid	--	--	0.821513	2.90937e-05	3
Cluster-81967.0	8.29656	up	--	--	IAA-Asp	2.79692	up	Indole-3-acetyl-L-aspartic acid	--	--	0.820506	3.03298e-05	3
Cluster-84625.3	2.23914	up	K05894	ko00592,ko01100,ko01110	IAA-Asp	2.79692	up	Indole-3-acetyl-L-aspartic acid	--	--	0.821121	2.95697e-05	3
Cluster-85161.2	8.19793	up	--	--	IAA-Asp	2.79692	up	Indole-3-acetyl-L-aspartic acid	--	--	0.839723	1.30716e-05	3
Cluster-85290.0	1.19592	up	--	--	IAA-Asp	2.79692	up	Indole-3-acetyl-L-aspartic acid	--	--	0.848289	8.66666e-06	3
Cluster-85299.4	1.30823	up	K12309	ko00052,ko00511,ko00531,ko00600,ko00604,ko01100	IAA-Asp	2.79692	up	Indole-3-acetyl-L-aspartic acid	--	--	0.892036	6.58234e-07	3
Cluster-85973.1	7.85845	up	--	--	IAA-Asp	2.79692	up	Indole-3-acetyl-L-aspartic acid	--	--	0.809977	4.61894e-05	3
Cluster-86042.2	6.57941	up	K12835	ko03040	IAA-Asp	2.79692	up	Indole-3-acetyl-L-aspartic acid	--	--	0.831241	1.91964e-05	3
Cluster-86094.17	2.60242	up	K16040	ko00945,ko01110	IAA-Asp	2.79692	up	Indole-3-acetyl-L-aspartic acid	--	--	0.952094	1.19973e-09	3
Cluster-86368.3	4.36591	up	K00162	ko00010,ko00020,ko00620,ko01100,ko01110,ko01200	IAA-Asp	2.79692	up	Indole-3-acetyl-L-aspartic acid	--	--	0.821447	2.91732e-05	3
Cluster-86368.9	1.72774	insig	K00162	ko00010,ko00020,ko00620,ko01100,ko01110,ko01200	IAA-Asp	2.79692	up	Indole-3-acetyl-L-aspartic acid	--	--	0.810448	4.53531e-05	3
Cluster-87146.6	8.33771	up	K13448	ko04626	IAA-Asp	2.79692	up	Indole-3-acetyl-L-aspartic acid	--	--	0.825503	2.46062e-05	3
Cluster-87146.9	8.44342	up	K13448	ko04626	IAA-Asp	2.79692	up	Indole-3-acetyl-L-aspartic acid	--	--	0.834217	1.68157e-05	3
Cluster-88799.2	2.50007	up	--	--	IAA-Asp	2.79692	up	Indole-3-acetyl-L-aspartic acid	--	--	0.818228	3.32944e-05	3
Cluster-89927.3	6.14801	up	--	--	IAA-Asp	2.79692	up	Indole-3-acetyl-L-aspartic acid	--	--	0.963815	1.31911e-10	3
Cluster-90137.3	9.86236	up	K00799	ko00480,ko01100	IAA-Asp	2.79692	up	Indole-3-acetyl-L-aspartic acid	--	--	0.826739	2.33427e-05	3
Cluster-90137.5	9.90078	up	K00799	ko00480,ko01100	IAA-Asp	2.79692	up	Indole-3-acetyl-L-aspartic acid	--	--	0.833371	1.74655e-05	3
Cluster-90416.2	2.72126	up	--	--	IAA-Asp	2.79692	up	Indole-3-acetyl-L-aspartic acid	--	--	0.85151	7.37784e-06	3
Cluster-90591.2	3.03935	up	--	--	IAA-Asp	2.79692	up	Indole-3-acetyl-L-aspartic acid	--	--	0.897242	4.50833e-07	3
Cluster-90602.1	4.3844	up	--	--	IAA-Asp	2.79692	up	Indole-3-acetyl-L-aspartic acid	--	--	0.826388	2.36957e-05	3
Cluster-90785.11	1.48149	up	K16040	ko00945,ko01110	IAA-Asp	2.79692	up	Indole-3-acetyl-L-aspartic acid	--	--	0.864421	3.71889e-06	3
Cluster-91294.0	8.3695	up	K00059	ko00061,ko00780,ko01100,ko01110,ko01212,ko01240	IAA-Asp	2.79692	up	Indole-3-acetyl-L-aspartic acid	--	--	0.831952	1.86026e-05	3
Cluster-91540.0	7.43364	up	K20725	ko04016	IAA-Asp	2.79692	up	Indole-3-acetyl-L-aspartic acid	--	--	0.820773	2.99982e-05	3
Cluster-91558.1	3.93493	up	K00799	ko00480,ko01100	IAA-Asp	2.79692	up	Indole-3-acetyl-L-aspartic acid	--	--	0.841609	1.19657e-05	3
Cluster-91836.0	1.31586	up	--	--	IAA-Asp	2.79692	up	Indole-3-acetyl-L-aspartic acid	--	--	0.882882	1.22508e-06	3
Cluster-92407.1	6.83372	up	--	--	IAA-Asp	2.79692	up	Indole-3-acetyl-L-aspartic acid	--	--	0.834257	1.67856e-05	3
Cluster-92665.0	1.20643	up	K13424	ko04016,ko04626	IAA-Asp	2.79692	up	Indole-3-acetyl-L-aspartic acid	--	--	0.889571	7.82218e-07	3
Cluster-92776.2	2.17883	up	K00430	ko00940,ko01100,ko01110	IAA-Asp	2.79692	up	Indole-3-acetyl-L-aspartic acid	--	--	0.828256	2.18673e-05	3
Cluster-93784.0	2.50844	up	--	--	IAA-Asp	2.79692	up	Indole-3-acetyl-L-aspartic acid	--	--	0.821788	2.87634e-05	3
Cluster-93810.11	2.37222	up	--	--	IAA-Asp	2.79692	up	Indole-3-acetyl-L-aspartic acid	--	--	0.857084	5.53357e-06	3
Cluster-93900.0	3.34514	up	--	--	IAA-Asp	2.79692	up	Indole-3-acetyl-L-aspartic acid	--	--	0.82205	2.84521e-05	3
Cluster-94095.1	6.18742	up	--	--	IAA-Asp	2.79692	up	Indole-3-acetyl-L-aspartic acid	--	--	0.863837	3.84167e-06	3
Cluster-94210.1	9.54094	up	K00083	ko00940,ko01100,ko01110	IAA-Asp	2.79692	up	Indole-3-acetyl-L-aspartic acid	--	--	0.842357	1.15498e-05	3
Cluster-9422.23	1.12205	up	K14498	ko04016,ko04075	IAA-Asp	2.79692	up	Indole-3-acetyl-L-aspartic acid	--	--	0.816032	3.63823e-05	3
Cluster-94314.0	2.90312	up	K15717	ko00590,ko01100	IAA-Asp	2.79692	up	Indole-3-acetyl-L-aspartic acid	--	--	0.831663	1.88421e-05	3
Cluster-94490.1	7.05173	up	K20547	ko00520,ko01100,ko04016	IAA-Asp	2.79692	up	Indole-3-acetyl-L-aspartic acid	--	--	0.832539	1.81248e-05	3
Cluster-94505.2	4.59266	up	K04077	ko03018	IAA-Asp	2.79692	up	Indole-3-acetyl-L-aspartic acid	--	--	0.85458	6.30621e-06	3
Cluster-94793.0	3.08931	up	--	--	IAA-Asp	2.79692	up	Indole-3-acetyl-L-aspartic acid	--	--	0.893931	5.74798e-07	3
Cluster-94793.7	8.97715	up	--	--	IAA-Asp	2.79692	up	Indole-3-acetyl-L-aspartic acid	--	--	0.813089	4.09e-05	3
Cluster-94798.1	2.24869	up	--	--	IAA-Asp	2.79692	up	Indole-3-acetyl-L-aspartic acid	--	--	0.859551	4.85354e-06	3
Cluster-94825.8	8.88943	up	K17686	ko04016	IAA-Asp	2.79692	up	Indole-3-acetyl-L-aspartic acid	--	--	0.804685	5.65213e-05	3
Cluster-94945.5	7.39985	up	--	--	IAA-Asp	2.79692	up	Indole-3-acetyl-L-aspartic acid	--	--	0.811356	4.37777e-05	3
Cluster-95429.2	1.35317	insig	K05359	ko00400,ko01100,ko01110,ko01230	IAA-Asp	2.79692	up	Indole-3-acetyl-L-aspartic acid	--	--	0.861025	4.4824e-06	3
Cluster-95504.3	1.09407	insig	K11153	ko01100,ko01240	IAA-Asp	2.79692	up	Indole-3-acetyl-L-aspartic acid	--	--	0.858298	5.18952e-06	3
Cluster-95550.1	8.86344	up	--	--	IAA-Asp	2.79692	up	Indole-3-acetyl-L-aspartic acid	--	--	0.801744	6.30696e-05	3
Cluster-95831.1	8.72671	up	--	--	IAA-Asp	2.79692	up	Indole-3-acetyl-L-aspartic acid	--	--	0.802933	6.03497e-05	3
Cluster-96149.3	8.98554	up	K00873	ko00010,ko00620,ko01100,ko01110,ko01200,ko01230	IAA-Asp	2.79692	up	Indole-3-acetyl-L-aspartic acid	--	--	0.829047	2.11302e-05	3
Cluster-96257.10	2.71171	up	K01087	ko00500,ko01100,ko01110	IAA-Asp	2.79692	up	Indole-3-acetyl-L-aspartic acid	--	--	0.955905	6.25614e-10	3
Cluster-96257.15	7.63853	up	K01087	ko00500,ko01100,ko01110	IAA-Asp	2.79692	up	Indole-3-acetyl-L-aspartic acid	--	--	0.823138	2.71884e-05	3
Cluster-96516.0	6.36401	up	--	--	IAA-Asp	2.79692	up	Indole-3-acetyl-L-aspartic acid	--	--	0.832766	1.79431e-05	3
Cluster-96749.0	6.12107	up	--	--	IAA-Asp	2.79692	up	Indole-3-acetyl-L-aspartic acid	--	--	0.833789	1.71419e-05	3
Cluster-96835.0	2.5537	up	K01875	ko00970	IAA-Asp	2.79692	up	Indole-3-acetyl-L-aspartic acid	--	--	0.842842	1.12868e-05	3
Cluster-97114.0	6.51994	up	--	--	IAA-Asp	2.79692	up	Indole-3-acetyl-L-aspartic acid	--	--	0.824759	2.53949e-05	3
Cluster-97131.1	5.3132	up	K12835	ko03040	IAA-Asp	2.79692	up	Indole-3-acetyl-L-aspartic acid	--	--	0.826315	2.377e-05	3
Cluster-97970.20	6.11463	up	K23260	ko00999,ko01110	IAA-Asp	2.79692	up	Indole-3-acetyl-L-aspartic acid	--	--	0.807476	5.08517e-05	3
Cluster-98295.1	7.78508	up	--	--	IAA-Asp	2.79692	up	Indole-3-acetyl-L-aspartic acid	--	--	0.803832	5.83588e-05	3
Cluster-98295.7	6.71557	up	--	--	IAA-Asp	2.79692	up	Indole-3-acetyl-L-aspartic acid	--	--	0.807726	5.03676e-05	3
Cluster-98364.0	7.3119	up	K10260	ko04120	IAA-Asp	2.79692	up	Indole-3-acetyl-L-aspartic acid	--	--	0.807558	5.06937e-05	3
Cluster-9838.4	1.77042	up	K01456	ko04141	IAA-Asp	2.79692	up	Indole-3-acetyl-L-aspartic acid	--	--	0.836609	1.509e-05	3
Cluster-98397.1	1.82945	up	K01183	ko00520,ko01100	IAA-Asp	2.79692	up	Indole-3-acetyl-L-aspartic acid	--	--	0.900102	3.63046e-07	3
Cluster-98655.4	8.61731	up	--	--	IAA-Asp	2.79692	up	Indole-3-acetyl-L-aspartic acid	--	--	0.805208	5.54199e-05	3
Cluster-98946.2	1.35612	up	--	--	IAA-Asp	2.79692	up	Indole-3-acetyl-L-aspartic acid	--	--	0.904401	2.58937e-07	3
Cluster-99042.1	6.63009	up	K18368	ko00940,ko01100,ko01110	IAA-Asp	2.79692	up	Indole-3-acetyl-L-aspartic acid	--	--	0.820114	3.08229e-05	3
Cluster-99112.2	1.38255	up	K14424	ko00100,ko01100,ko01110	IAA-Asp	2.79692	up	Indole-3-acetyl-L-aspartic acid	--	--	0.814842	3.81552e-05	3
Cluster-9919.11	4.01965	up	--	--	IAA-Asp	2.79692	up	Indole-3-acetyl-L-aspartic acid	--	--	0.81477	3.82647e-05	3
Cluster-9919.16	1.68863	up	--	--	IAA-Asp	2.79692	up	Indole-3-acetyl-L-aspartic acid	--	--	0.846298	9.55628e-06	3
Cluster-99255.0	8.95751	up	K01580	ko00250,ko00410,ko00430,ko00650,ko01100,ko01110	IAA-Asp	2.79692	up	Indole-3-acetyl-L-aspartic acid	--	--	0.837095	1.47583e-05	3
Cluster-99311.0	5.16081	up	K12472	ko04144	IAA-Asp	2.79692	up	Indole-3-acetyl-L-aspartic acid	--	--	0.819027	3.22278e-05	3
Cluster-99311.1	13.1289	up	K12472	ko04144	IAA-Asp	2.79692	up	Indole-3-acetyl-L-aspartic acid	--	--	0.829782	2.04651e-05	3
Cluster-99323.2	6.94773	up	--	--	IAA-Asp	2.79692	up	Indole-3-acetyl-L-aspartic acid	--	--	0.839947	1.29362e-05	3
Cluster-99547.17	1.1538	up	--	--	IAA-Asp	2.79692	up	Indole-3-acetyl-L-aspartic acid	--	--	0.834395	1.66821e-05	3
Cluster-100006.1	2.20342	up	K00695	ko00500,ko01100,ko01110	IAA	2.16008	up	Indole-3-acetic acid	C00954	ko00380,ko01100,ko04075	0.830928	1.94628e-05	3
Cluster-100006.14	2.36586	up	K00695	ko00500,ko01100,ko01110	IAA	2.16008	up	Indole-3-acetic acid	C00954	ko00380,ko01100,ko04075	0.866045	3.39525e-06	3
Cluster-100006.22	1.11349	up	K00695	ko00500,ko01100,ko01110	IAA	2.16008	up	Indole-3-acetic acid	C00954	ko00380,ko01100,ko04075	0.879604	1.51156e-06	3
Cluster-100006.31	1.07415	up	K00695	ko00500,ko01100,ko01110	IAA	2.16008	up	Indole-3-acetic acid	C00954	ko00380,ko01100,ko04075	0.922186	5.28368e-08	3
Cluster-100006.33	1.00502	up	K00695	ko00500,ko01100,ko01110	IAA	2.16008	up	Indole-3-acetic acid	C00954	ko00380,ko01100,ko04075	0.882673	1.24185e-06	3
Cluster-100006.38	1.21953	up	K00695	ko00500,ko01100,ko01110	IAA	2.16008	up	Indole-3-acetic acid	C00954	ko00380,ko01100,ko04075	0.891093	7.03501e-07	3
Cluster-100006.39	1.97603	up	K00695	ko00500,ko01100,ko01110	IAA	2.16008	up	Indole-3-acetic acid	C00954	ko00380,ko01100,ko04075	0.825698	2.44035e-05	3
Cluster-100006.44	1.72464	up	--	--	IAA	2.16008	up	Indole-3-acetic acid	C00954	ko00380,ko01100,ko04075	0.832645	1.80396e-05	3
Cluster-100006.46	3.21982	up	--	--	IAA	2.16008	up	Indole-3-acetic acid	C00954	ko00380,ko01100,ko04075	0.806137	5.3508e-05	3
Cluster-100006.48	5.74233	up	K13993	ko04141	IAA	2.16008	up	Indole-3-acetic acid	C00954	ko00380,ko01100,ko04075	0.827843	2.22607e-05	3
Cluster-100192.0	6.45298	up	--	--	IAA	2.16008	up	Indole-3-acetic acid	C00954	ko00380,ko01100,ko04075	0.918434	7.60918e-08	3
Cluster-100257.1	10.2221	up	K14152	ko00340,ko01100,ko01110,ko01230	IAA	2.16008	up	Indole-3-acetic acid	C00954	ko00380,ko01100,ko04075	0.875714	1.92473e-06	3
Cluster-100389.2	10.3761	up	--	--	IAA	2.16008	up	Indole-3-acetic acid	C00954	ko00380,ko01100,ko04075	0.811209	4.40294e-05	3
Cluster-100391.3	2.03232	up	--	--	IAA	2.16008	up	Indole-3-acetic acid	C00954	ko00380,ko01100,ko04075	0.825118	2.50117e-05	3
Cluster-100412.6	11.7342	up	K00660	ko00941,ko00960,ko01100,ko01110,ko04712	IAA	2.16008	up	Indole-3-acetic acid	C00954	ko00380,ko01100,ko04075	0.803717	5.86103e-05	3
Cluster-100435.1	5.01791	up	K15803	ko00909	IAA	2.16008	up	Indole-3-acetic acid	C00954	ko00380,ko01100,ko04075	0.801822	6.28882e-05	3
Cluster-100533.0	4.34362	up	K02723	ko00195,ko01100	IAA	2.16008	up	Indole-3-acetic acid	C00954	ko00380,ko01100,ko04075	0.880052	1.46923e-06	3
Cluster-100533.1	4.39626	up	K02723	ko00195,ko01100	IAA	2.16008	up	Indole-3-acetic acid	C00954	ko00380,ko01100,ko04075	0.878575	1.61256e-06	3
Cluster-100566.4	3.2462	up	--	--	IAA	2.16008	up	Indole-3-acetic acid	C00954	ko00380,ko01100,ko04075	0.883203	1.1997e-06	3
Cluster-100580.1	4.84902	up	--	--	IAA	2.16008	up	Indole-3-acetic acid	C00954	ko00380,ko01100,ko04075	0.838126	1.40756e-05	3
Cluster-100588.0	8.03379	up	--	--	IAA	2.16008	up	Indole-3-acetic acid	C00954	ko00380,ko01100,ko04075	0.831251	1.9188e-05	3
Cluster-100646.1	2.14168	up	K21888	ko00053,ko00480,ko01100	IAA	2.16008	up	Indole-3-acetic acid	C00954	ko00380,ko01100,ko04075	0.899714	3.74035e-07	3
Cluster-100676.7	10.1871	up	K12741	ko03040	IAA	2.16008	up	Indole-3-acetic acid	C00954	ko00380,ko01100,ko04075	0.848848	8.43007e-06	3
Cluster-100840.0	1.89975	up	--	--	IAA	2.16008	up	Indole-3-acetic acid	C00954	ko00380,ko01100,ko04075	0.851624	7.33568e-06	3
Cluster-100908.0	2.39735	up	--	--	IAA	2.16008	up	Indole-3-acetic acid	C00954	ko00380,ko01100,ko04075	0.883417	1.18311e-06	3
Cluster-101028.0	9.44677	up	K14486	ko04075	IAA	2.16008	up	Indole-3-acetic acid	C00954	ko00380,ko01100,ko04075	0.819356	3.17963e-05	3
Cluster-101079.0	11.0606	up	--	--	IAA	2.16008	up	Indole-3-acetic acid	C00954	ko00380,ko01100,ko04075	0.86958	2.77334e-06	3
Cluster-101085.1	10.7095	up	K00083	ko00940,ko01100,ko01110	IAA	2.16008	up	Indole-3-acetic acid	C00954	ko00380,ko01100,ko04075	0.875215	1.98421e-06	3
Cluster-101090.1	11.0783	up	K08917	ko00196,ko01100	IAA	2.16008	up	Indole-3-acetic acid	C00954	ko00380,ko01100,ko04075	0.873725	2.17117e-06	3
Cluster-101143.0	2.09991	up	K14492	ko04075	IAA	2.16008	up	Indole-3-acetic acid	C00954	ko00380,ko01100,ko04075	0.819727	3.13177e-05	3
Cluster-10120.173	3.73443	up	--	--	IAA	2.16008	up	Indole-3-acetic acid	C00954	ko00380,ko01100,ko04075	0.815158	3.76761e-05	3
Cluster-101203.0	3.14463	up	--	--	IAA	2.16008	up	Indole-3-acetic acid	C00954	ko00380,ko01100,ko04075	0.803134	5.99e-05	3
Cluster-101298.0	2.15063	up	--	--	IAA	2.16008	up	Indole-3-acetic acid	C00954	ko00380,ko01100,ko04075	0.868346	2.97826e-06	3
Cluster-101316.0	1.84786	up	--	--	IAA	2.16008	up	Indole-3-acetic acid	C00954	ko00380,ko01100,ko04075	0.843733	1.08169e-05	3
Cluster-101497.0	7.76241	up	--	--	IAA	2.16008	up	Indole-3-acetic acid	C00954	ko00380,ko01100,ko04075	0.873105	2.25335e-06	3
Cluster-101497.1	7.87156	up	--	--	IAA	2.16008	up	Indole-3-acetic acid	C00954	ko00380,ko01100,ko04075	0.870133	2.68555e-06	3
Cluster-101533.0	4.69965	up	--	--	IAA	2.16008	up	Indole-3-acetic acid	C00954	ko00380,ko01100,ko04075	0.876769	1.80404e-06	3
Cluster-101533.2	8.31736	up	--	--	IAA	2.16008	up	Indole-3-acetic acid	C00954	ko00380,ko01100,ko04075	0.863078	4.00635e-06	3
Cluster-101580.0	2.25229	up	--	--	IAA	2.16008	up	Indole-3-acetic acid	C00954	ko00380,ko01100,ko04075	0.835727	1.57075e-05	3
Cluster-101605.2	7.2795	up	--	--	IAA	2.16008	up	Indole-3-acetic acid	C00954	ko00380,ko01100,ko04075	0.846513	9.45683e-06	3
Cluster-101638.1	1.3184	up	K00847	ko00051,ko00500,ko00520,ko01100,ko01110,ko01250	IAA	2.16008	up	Indole-3-acetic acid	C00954	ko00380,ko01100,ko04075	0.814717	3.83445e-05	3
Cluster-101715.1	8.35331	up	K13436	ko04626	IAA	2.16008	up	Indole-3-acetic acid	C00954	ko00380,ko01100,ko04075	0.812728	4.14859e-05	3
Cluster-101739.3	8.22472	up	K14538	ko03008	IAA	2.16008	up	Indole-3-acetic acid	C00954	ko00380,ko01100,ko04075	0.801467	6.37201e-05	3
Cluster-101739.7	6.35082	up	K14538	ko03008	IAA	2.16008	up	Indole-3-acetic acid	C00954	ko00380,ko01100,ko04075	0.812788	4.1388e-05	3
Cluster-101801.0	2.90726	up	K07466	ko03030,ko03420,ko03430,ko03440	IAA	2.16008	up	Indole-3-acetic acid	C00954	ko00380,ko01100,ko04075	0.887473	9.03137e-07	3
Cluster-101869.2	5.41983	up	--	--	IAA	2.16008	up	Indole-3-acetic acid	C00954	ko00380,ko01100,ko04075	0.900264	3.58568e-07	3
Cluster-101916.1	2.3598	up	--	--	IAA	2.16008	up	Indole-3-acetic acid	C00954	ko00380,ko01100,ko04075	0.837854	1.42531e-05	3
Cluster-101987.5	3.43846	up	K13427	ko00220,ko00330,ko01100,ko01110,ko04626	IAA	2.16008	up	Indole-3-acetic acid	C00954	ko00380,ko01100,ko04075	0.864202	3.76446e-06	3
Cluster-102082.0	4.45115	up	--	--	IAA	2.16008	up	Indole-3-acetic acid	C00954	ko00380,ko01100,ko04075	0.875558	1.94317e-06	3
Cluster-102082.11	8.58351	up	--	--	IAA	2.16008	up	Indole-3-acetic acid	C00954	ko00380,ko01100,ko04075	0.894988	5.32366e-07	3
Cluster-102107.3	8.55544	up	--	--	IAA	2.16008	up	Indole-3-acetic acid	C00954	ko00380,ko01100,ko04075	0.80066	6.56404e-05	3
Cluster-102176.0	1.41909	up	K02717	ko00195,ko01100	IAA	2.16008	up	Indole-3-acetic acid	C00954	ko00380,ko01100,ko04075	0.807847	5.01362e-05	3
Cluster-102232.0	2.93719	up	K19073	ko00860,ko01100,ko01110	IAA	2.16008	up	Indole-3-acetic acid	C00954	ko00380,ko01100,ko04075	0.802319	6.17407e-05	3
Cluster-102242.0	2.98883	up	K14307	ko03013	IAA	2.16008	up	Indole-3-acetic acid	C00954	ko00380,ko01100,ko04075	0.901465	3.26715e-07	3
Cluster-102270.9	1.80761	up	K13473	ko04626	IAA	2.16008	up	Indole-3-acetic acid	C00954	ko00380,ko01100,ko04075	0.818236	3.32832e-05	3
Cluster-102271.5	4.83196	up	K13513	ko00561,ko00564,ko01100,ko01110	IAA	2.16008	up	Indole-3-acetic acid	C00954	ko00380,ko01100,ko04075	0.823273	2.70352e-05	3
Cluster-102287.1	3.15129	up	--	--	IAA	2.16008	up	Indole-3-acetic acid	C00954	ko00380,ko01100,ko04075	0.878205	1.65033e-06	3
Cluster-102287.4	4.50456	up	--	--	IAA	2.16008	up	Indole-3-acetic acid	C00954	ko00380,ko01100,ko04075	0.843711	1.08279e-05	3
Cluster-102327.1	9.25581	up	K03124	ko03022	IAA	2.16008	up	Indole-3-acetic acid	C00954	ko00380,ko01100,ko04075	0.851931	7.2225e-06	3
Cluster-102368.1	9.90442	up	K07342	ko03060,ko04141,ko04145	IAA	2.16008	up	Indole-3-acetic acid	C00954	ko00380,ko01100,ko04075	0.845846	9.76883e-06	3
Cluster-102378.0	11.8677	up	--	--	IAA	2.16008	up	Indole-3-acetic acid	C00954	ko00380,ko01100,ko04075	0.871049	2.5453e-06	3
Cluster-102378.1	5.41868	up	--	--	IAA	2.16008	up	Indole-3-acetic acid	C00954	ko00380,ko01100,ko04075	0.824085	2.61283e-05	3
Cluster-102409.0	5.90046	up	--	--	IAA	2.16008	up	Indole-3-acetic acid	C00954	ko00380,ko01100,ko04075	0.831657	1.88469e-05	3
Cluster-102438.3	16.4952	up	K13993	ko04141	IAA	2.16008	up	Indole-3-acetic acid	C00954	ko00380,ko01100,ko04075	0.864876	3.62569e-06	3
Cluster-102438.4	6.0859	up	K13993	ko04141	IAA	2.16008	up	Indole-3-acetic acid	C00954	ko00380,ko01100,ko04075	0.879479	1.52349e-06	3
Cluster-102438.5	10.2341	up	K13993	ko04141	IAA	2.16008	up	Indole-3-acetic acid	C00954	ko00380,ko01100,ko04075	0.829309	2.08913e-05	3
Cluster-102451.0	7.63684	up	K00975	ko00500,ko00520,ko01100,ko01110,ko01250	IAA	2.16008	up	Indole-3-acetic acid	C00954	ko00380,ko01100,ko04075	0.857039	5.54681e-06	3
Cluster-102478.0	5.46753	up	--	--	IAA	2.16008	up	Indole-3-acetic acid	C00954	ko00380,ko01100,ko04075	0.841676	1.19279e-05	3
Cluster-102501.0	10.4152	up	--	--	IAA	2.16008	up	Indole-3-acetic acid	C00954	ko00380,ko01100,ko04075	0.874022	2.13268e-06	3
Cluster-102501.2	11.1948	up	--	--	IAA	2.16008	up	Indole-3-acetic acid	C00954	ko00380,ko01100,ko04075	0.81485	3.81424e-05	3
Cluster-102524.3	9.66911	up	--	--	IAA	2.16008	up	Indole-3-acetic acid	C00954	ko00380,ko01100,ko04075	0.89223	6.49214e-07	3
Cluster-102530.8	2.17812	up	--	--	IAA	2.16008	up	Indole-3-acetic acid	C00954	ko00380,ko01100,ko04075	0.863543	3.90469e-06	3
Cluster-102555.27	6.96971	up	--	--	IAA	2.16008	up	Indole-3-acetic acid	C00954	ko00380,ko01100,ko04075	0.854822	6.22775e-06	3
Cluster-102561.1	1.36002	up	--	--	IAA	2.16008	up	Indole-3-acetic acid	C00954	ko00380,ko01100,ko04075	0.808083	4.9685e-05	3
Cluster-102595.4	3.80758	up	--	--	IAA	2.16008	up	Indole-3-acetic acid	C00954	ko00380,ko01100,ko04075	0.891211	6.97668e-07	3
Cluster-102657.0	3.48799	up	--	--	IAA	2.16008	up	Indole-3-acetic acid	C00954	ko00380,ko01100,ko04075	0.914676	1.07786e-07	3
Cluster-102815.4	2.29448	up	K01179	ko00500,ko01100	IAA	2.16008	up	Indole-3-acetic acid	C00954	ko00380,ko01100,ko04075	0.819908	3.10851e-05	3
Cluster-102904.0	1.64914	up	K16240	ko04712	IAA	2.16008	up	Indole-3-acetic acid	C00954	ko00380,ko01100,ko04075	0.808283	4.93051e-05	3
Cluster-102920.0	1.55224	up	K01051	ko00040,ko01100	IAA	2.16008	up	Indole-3-acetic acid	C00954	ko00380,ko01100,ko04075	0.895807	5.01386e-07	3
Cluster-103081.3	6.0717	up	--	--	IAA	2.16008	up	Indole-3-acetic acid	C00954	ko00380,ko01100,ko04075	0.83925	1.33624e-05	3
Cluster-103090.0	7.89142	up	--	--	IAA	2.16008	up	Indole-3-acetic acid	C00954	ko00380,ko01100,ko04075	0.8047	5.64905e-05	3
Cluster-103090.2	8.56037	up	--	--	IAA	2.16008	up	Indole-3-acetic acid	C00954	ko00380,ko01100,ko04075	0.817315	3.45493e-05	3
Cluster-103095.1	7.84589	up	--	--	IAA	2.16008	up	Indole-3-acetic acid	C00954	ko00380,ko01100,ko04075	0.855081	6.14464e-06	3
Cluster-103283.0	9.69464	up	--	--	IAA	2.16008	up	Indole-3-acetic acid	C00954	ko00380,ko01100,ko04075	0.800871	6.5135e-05	3
Cluster-103380.2	1.96332	up	--	--	IAA	2.16008	up	Indole-3-acetic acid	C00954	ko00380,ko01100,ko04075	0.814736	3.83153e-05	3
Cluster-103382.8	8.18666	up	--	--	IAA	2.16008	up	Indole-3-acetic acid	C00954	ko00380,ko01100,ko04075	0.80292	6.03783e-05	3
Cluster-103417.0	3.06472	up	--	--	IAA	2.16008	up	Indole-3-acetic acid	C00954	ko00380,ko01100,ko04075	0.810402	4.54337e-05	3
Cluster-103465.4	3.90427	up	K13544	ko00860,ko01110	IAA	2.16008	up	Indole-3-acetic acid	C00954	ko00380,ko01100,ko04075	0.861076	4.46996e-06	3
Cluster-103541.0	1.18293	up	--	--	IAA	2.16008	up	Indole-3-acetic acid	C00954	ko00380,ko01100,ko04075	0.903202	2.84983e-07	3
Cluster-103560.1	6.26387	up	--	--	IAA	2.16008	up	Indole-3-acetic acid	C00954	ko00380,ko01100,ko04075	0.803645	5.87685e-05	3
Cluster-103663.0	9.36359	up	--	--	IAA	2.16008	up	Indole-3-acetic acid	C00954	ko00380,ko01100,ko04075	0.812524	4.18193e-05	3
Cluster-103683.0	2.18153	up	K00679	ko00561,ko01100	IAA	2.16008	up	Indole-3-acetic acid	C00954	ko00380,ko01100,ko04075	0.826364	2.37201e-05	3
Cluster-103752.1	10.4465	up	K13126	ko03015,ko03018	IAA	2.16008	up	Indole-3-acetic acid	C00954	ko00380,ko01100,ko04075	0.805957	5.38751e-05	3
Cluster-103754.9	2.33543	up	--	--	IAA	2.16008	up	Indole-3-acetic acid	C00954	ko00380,ko01100,ko04075	0.805175	5.54891e-05	3
Cluster-103759.3	10.6018	up	K12489	ko04144	IAA	2.16008	up	Indole-3-acetic acid	C00954	ko00380,ko01100,ko04075	0.858695	5.08088e-06	3
Cluster-103771.0	6.5201	up	--	--	IAA	2.16008	up	Indole-3-acetic acid	C00954	ko00380,ko01100,ko04075	0.90579	2.31367e-07	3
Cluster-103787.8	12.3822	up	K14504	ko04075	IAA	2.16008	up	Indole-3-acetic acid	C00954	ko00380,ko01100,ko04075	0.847745	8.90269e-06	3
Cluster-103793.4	6.67578	up	--	--	IAA	2.16008	up	Indole-3-acetic acid	C00954	ko00380,ko01100,ko04075	0.836678	1.50428e-05	3
Cluster-103828.0	1.47776	up	--	--	IAA	2.16008	up	Indole-3-acetic acid	C00954	ko00380,ko01100,ko04075	0.830267	2.00351e-05	3
Cluster-103892.0	2.1376	up	--	--	IAA	2.16008	up	Indole-3-acetic acid	C00954	ko00380,ko01100,ko04075	0.872198	2.37834e-06	3
Cluster-103971.3	8.88861	up	K13495	ko00908,ko01110	IAA	2.16008	up	Indole-3-acetic acid	C00954	ko00380,ko01100,ko04075	0.865917	3.41993e-06	3
Cluster-10400.9	7.71112	up	--	--	IAA	2.16008	up	Indole-3-acetic acid	C00954	ko00380,ko01100,ko04075	0.81226	4.22559e-05	3
Cluster-104012.0	3.40689	up	--	--	IAA	2.16008	up	Indole-3-acetic acid	C00954	ko00380,ko01100,ko04075	0.859285	4.9232e-06	3
Cluster-104053.0	5.44488	up	K14508	ko04075	IAA	2.16008	up	Indole-3-acetic acid	C00954	ko00380,ko01100,ko04075	0.850471	7.7744e-06	3
Cluster-104057.2	5.86688	up	--	--	IAA	2.16008	up	Indole-3-acetic acid	C00954	ko00380,ko01100,ko04075	0.856032	5.84766e-06	3
Cluster-104231.2	6.93063	up	K03364	ko04120	IAA	2.16008	up	Indole-3-acetic acid	C00954	ko00380,ko01100,ko04075	0.844632	1.03597e-05	3
Cluster-104254.3	11.5936	up	--	--	IAA	2.16008	up	Indole-3-acetic acid	C00954	ko00380,ko01100,ko04075	0.844162	1.05964e-05	3
Cluster-104255.0	11.1604	up	--	--	IAA	2.16008	up	Indole-3-acetic acid	C00954	ko00380,ko01100,ko04075	0.823335	2.69643e-05	3
Cluster-104329.0	1.19995	up	K08737	ko03430	IAA	2.16008	up	Indole-3-acetic acid	C00954	ko00380,ko01100,ko04075	0.810434	4.53772e-05	3
Cluster-104371.0	1.01565	up	--	--	IAA	2.16008	up	Indole-3-acetic acid	C00954	ko00380,ko01100,ko04075	0.809616	4.68391e-05	3
Cluster-104376.0	6.72086	up	--	--	IAA	2.16008	up	Indole-3-acetic acid	C00954	ko00380,ko01100,ko04075	0.840863	1.2393e-05	3
Cluster-104531.0	8.67256	up	--	--	IAA	2.16008	up	Indole-3-acetic acid	C00954	ko00380,ko01100,ko04075	0.880471	1.43067e-06	3
Cluster-104546.0	1.74992	up	--	--	IAA	2.16008	up	Indole-3-acetic acid	C00954	ko00380,ko01100,ko04075	0.810236	4.57277e-05	3
Cluster-104611.2	4.41555	up	--	--	IAA	2.16008	up	Indole-3-acetic acid	C00954	ko00380,ko01100,ko04075	0.836323	1.52877e-05	3
Cluster-104630.1	9.90114	up	K07151	ko00510,ko00513,ko01100,ko04141	IAA	2.16008	up	Indole-3-acetic acid	C00954	ko00380,ko01100,ko04075	0.858316	5.18448e-06	3
Cluster-104670.4	2.20634	up	--	--	IAA	2.16008	up	Indole-3-acetic acid	C00954	ko00380,ko01100,ko04075	0.807618	5.05771e-05	3
Cluster-104681.10	12.1513	up	K15397	ko00062,ko01100,ko01110,ko04626	IAA	2.16008	up	Indole-3-acetic acid	C00954	ko00380,ko01100,ko04075	0.863649	3.88177e-06	3
Cluster-104681.9	11.2679	up	K15397	ko00062,ko01100,ko01110,ko04626	IAA	2.16008	up	Indole-3-acetic acid	C00954	ko00380,ko01100,ko04075	0.89346	5.94642e-07	3
Cluster-104725.0	1.51631	up	--	--	IAA	2.16008	up	Indole-3-acetic acid	C00954	ko00380,ko01100,ko04075	0.862738	4.08193e-06	3
Cluster-104752.0	12.1885	up	--	--	IAA	2.16008	up	Indole-3-acetic acid	C00954	ko00380,ko01100,ko04075	0.875817	1.91262e-06	3
Cluster-104767.0	2.94151	up	--	--	IAA	2.16008	up	Indole-3-acetic acid	C00954	ko00380,ko01100,ko04075	0.890397	7.38566e-07	3
Cluster-104779.0	2.38707	up	K03403	ko00860,ko01100,ko01110	IAA	2.16008	up	Indole-3-acetic acid	C00954	ko00380,ko01100,ko04075	0.827321	2.2767e-05	3
Cluster-104817.0	1.48157	up	K00703	ko00500,ko01100,ko01110	IAA	2.16008	up	Indole-3-acetic acid	C00954	ko00380,ko01100,ko04075	0.818099	3.34684e-05	3
Cluster-104840.1	4.85121	up	--	--	IAA	2.16008	up	Indole-3-acetic acid	C00954	ko00380,ko01100,ko04075	0.900638	3.48371e-07	3
Cluster-104884.0	2.71959	up	--	--	IAA	2.16008	up	Indole-3-acetic acid	C00954	ko00380,ko01100,ko04075	0.819648	3.14182e-05	3
Cluster-104951.1	2.67787	up	--	--	IAA	2.16008	up	Indole-3-acetic acid	C00954	ko00380,ko01100,ko04075	0.82682	2.32622e-05	3
Cluster-105067.2	8.38494	up	--	--	IAA	2.16008	up	Indole-3-acetic acid	C00954	ko00380,ko01100,ko04075	0.861996	4.2516e-06	3
Cluster-105070.0	2.1458	up	K08486	ko04130	IAA	2.16008	up	Indole-3-acetic acid	C00954	ko00380,ko01100,ko04075	0.847108	9.18562e-06	3
Cluster-105159.4	11.4492	up	--	--	IAA	2.16008	up	Indole-3-acetic acid	C00954	ko00380,ko01100,ko04075	0.858827	5.04532e-06	3
Cluster-105298.3	8.91992	up	--	--	IAA	2.16008	up	Indole-3-acetic acid	C00954	ko00380,ko01100,ko04075	0.827882	2.22235e-05	3
Cluster-105329.1	10.0715	up	K13071	ko00860,ko01110	IAA	2.16008	up	Indole-3-acetic acid	C00954	ko00380,ko01100,ko04075	0.862319	4.17699e-06	3
Cluster-105331.8	2.45783	up	K02433	ko00970,ko01100	IAA	2.16008	up	Indole-3-acetic acid	C00954	ko00380,ko01100,ko04075	0.827075	2.30088e-05	3
Cluster-105341.0	3.50862	up	K20769	ko00073	IAA	2.16008	up	Indole-3-acetic acid	C00954	ko00380,ko01100,ko04075	0.871137	2.53219e-06	3
Cluster-105368.14	8.57293	up	--	--	IAA	2.16008	up	Indole-3-acetic acid	C00954	ko00380,ko01100,ko04075	0.809363	4.72989e-05	3
Cluster-105495.1	2.71708	up	K00485	ko00430,ko01100	IAA	2.16008	up	Indole-3-acetic acid	C00954	ko00380,ko01100,ko04075	0.829697	2.0541e-05	3
Cluster-105561.0	1.06237	up	--	--	IAA	2.16008	up	Indole-3-acetic acid	C00954	ko00380,ko01100,ko04075	0.811905	4.28478e-05	3
Cluster-105568.7	3.09061	up	--	--	IAA	2.16008	up	Indole-3-acetic acid	C00954	ko00380,ko01100,ko04075	0.831675	1.88322e-05	3
Cluster-10562.6	3.76248	up	--	--	IAA	2.16008	up	Indole-3-acetic acid	C00954	ko00380,ko01100,ko04075	0.843055	1.11728e-05	3
Cluster-105657.0	10.3127	up	K01724	ko00790,ko01100	IAA	2.16008	up	Indole-3-acetic acid	C00954	ko00380,ko01100,ko04075	0.852696	6.94689e-06	3
Cluster-105814.0	1.89088	up	K01728	ko00040,ko01100	IAA	2.16008	up	Indole-3-acetic acid	C00954	ko00380,ko01100,ko04075	0.855987	5.86154e-06	3
Cluster-105828.0	3.20418	up	K03575	ko03410	IAA	2.16008	up	Indole-3-acetic acid	C00954	ko00380,ko01100,ko04075	0.898889	3.98306e-07	3
Cluster-105865.1	2.32445	up	--	--	IAA	2.16008	up	Indole-3-acetic acid	C00954	ko00380,ko01100,ko04075	0.827821	2.22821e-05	3
Cluster-105865.7	4.00142	up	--	--	IAA	2.16008	up	Indole-3-acetic acid	C00954	ko00380,ko01100,ko04075	0.859149	4.95928e-06	3
Cluster-105903.0	2.07961	up	--	--	IAA	2.16008	up	Indole-3-acetic acid	C00954	ko00380,ko01100,ko04075	0.832532	1.81302e-05	3
Cluster-105924.0	5.06771	up	K10246	ko00062,ko01040,ko01100,ko01110,ko01212	IAA	2.16008	up	Indole-3-acetic acid	C00954	ko00380,ko01100,ko04075	0.905072	2.4528e-07	3
Cluster-106148.4	4.00424	up	K14432	ko04075	IAA	2.16008	up	Indole-3-acetic acid	C00954	ko00380,ko01100,ko04075	0.880715	1.40862e-06	3
Cluster-106197.4	8.00217	up	--	--	IAA	2.16008	up	Indole-3-acetic acid	C00954	ko00380,ko01100,ko04075	0.815682	3.68951e-05	3
Cluster-106229.1	2.3683	up	--	--	IAA	2.16008	up	Indole-3-acetic acid	C00954	ko00380,ko01100,ko04075	0.814727	3.83301e-05	3
Cluster-106354.0	9.87661	up	--	--	IAA	2.16008	up	Indole-3-acetic acid	C00954	ko00380,ko01100,ko04075	0.801045	6.47182e-05	3
Cluster-106424.3	11.147	up	K00873	ko00010,ko00620,ko01100,ko01110,ko01200,ko01230	IAA	2.16008	up	Indole-3-acetic acid	C00954	ko00380,ko01100,ko04075	0.865942	3.41498e-06	3
Cluster-106480.0	3.58785	up	K13126	ko03015,ko03018	IAA	2.16008	up	Indole-3-acetic acid	C00954	ko00380,ko01100,ko04075	0.875113	1.99656e-06	3
Cluster-106480.1	4.3153	up	K13126	ko03015,ko03018	IAA	2.16008	up	Indole-3-acetic acid	C00954	ko00380,ko01100,ko04075	0.862945	4.03582e-06	3
Cluster-106539.1	2.04174	up	--	--	IAA	2.16008	up	Indole-3-acetic acid	C00954	ko00380,ko01100,ko04075	0.904758	2.51595e-07	3
Cluster-106604.0	2.87447	up	--	--	IAA	2.16008	up	Indole-3-acetic acid	C00954	ko00380,ko01100,ko04075	0.872733	2.30395e-06	3
Cluster-106647.0	1.44208	up	--	--	IAA	2.16008	up	Indole-3-acetic acid	C00954	ko00380,ko01100,ko04075	0.818905	3.23879e-05	3
Cluster-106666.1	11.1188	up	K13679	ko00500,ko01100,ko01110	IAA	2.16008	up	Indole-3-acetic acid	C00954	ko00380,ko01100,ko04075	0.867883	3.05838e-06	3
Cluster-106668.1	6.68152	up	--	--	IAA	2.16008	up	Indole-3-acetic acid	C00954	ko00380,ko01100,ko04075	0.801481	6.36859e-05	3
Cluster-106747.1	5.54061	up	K01627	ko01100,ko01250	IAA	2.16008	up	Indole-3-acetic acid	C00954	ko00380,ko01100,ko04075	0.816131	3.62368e-05	3
Cluster-106788.0	10.0949	up	--	--	IAA	2.16008	up	Indole-3-acetic acid	C00954	ko00380,ko01100,ko04075	0.912633	1.29389e-07	3
Cluster-106788.3	2.89405	up	--	--	IAA	2.16008	up	Indole-3-acetic acid	C00954	ko00380,ko01100,ko04075	0.850745	7.66827e-06	3
Cluster-106901.0	2.32652	up	--	--	IAA	2.16008	up	Indole-3-acetic acid	C00954	ko00380,ko01100,ko04075	0.831013	1.93898e-05	3
Cluster-107035.0	2.09192	up	--	--	IAA	2.16008	up	Indole-3-acetic acid	C00954	ko00380,ko01100,ko04075	0.87089	2.56918e-06	3
Cluster-107162.2	7.17119	up	--	--	IAA	2.16008	up	Indole-3-acetic acid	C00954	ko00380,ko01100,ko04075	0.835308	1.60085e-05	3
Cluster-107446.2	9.74578	up	--	--	IAA	2.16008	up	Indole-3-acetic acid	C00954	ko00380,ko01100,ko04075	0.804768	5.63467e-05	3
Cluster-107459.0	2.09516	up	K08247	ko00450,ko01100	IAA	2.16008	up	Indole-3-acetic acid	C00954	ko00380,ko01100,ko04075	0.850286	7.8471e-06	3
Cluster-107461.0	9.0402	up	--	--	IAA	2.16008	up	Indole-3-acetic acid	C00954	ko00380,ko01100,ko04075	0.82879	2.13675e-05	3
Cluster-107469.4	6.20587	up	--	--	IAA	2.16008	up	Indole-3-acetic acid	C00954	ko00380,ko01100,ko04075	0.870284	2.66199e-06	3
Cluster-107469.7	10.5725	up	--	--	IAA	2.16008	up	Indole-3-acetic acid	C00954	ko00380,ko01100,ko04075	0.832311	1.83092e-05	3
Cluster-107469.9	17.833	up	--	--	IAA	2.16008	up	Indole-3-acetic acid	C00954	ko00380,ko01100,ko04075	0.860207	4.68515e-06	3
Cluster-107596.1	3.3891	up	K14490	ko04075	IAA	2.16008	up	Indole-3-acetic acid	C00954	ko00380,ko01100,ko04075	0.85232	7.08108e-06	3
Cluster-107626.0	3.20757	up	K02140	ko00190,ko01100	IAA	2.16008	up	Indole-3-acetic acid	C00954	ko00380,ko01100,ko04075	0.844678	1.03366e-05	3
Cluster-107627.2	8.05441	up	--	--	IAA	2.16008	up	Indole-3-acetic acid	C00954	ko00380,ko01100,ko04075	0.854451	6.34841e-06	3
Cluster-107675.2	1.62144	up	--	--	IAA	2.16008	up	Indole-3-acetic acid	C00954	ko00380,ko01100,ko04075	0.861469	4.37553e-06	3
Cluster-107725.3	8.67173	up	--	--	IAA	2.16008	up	Indole-3-acetic acid	C00954	ko00380,ko01100,ko04075	0.885233	1.04964e-06	3
Cluster-107725.4	4.98321	up	--	--	IAA	2.16008	up	Indole-3-acetic acid	C00954	ko00380,ko01100,ko04075	0.835726	1.57086e-05	3
Cluster-107733.2	2.51539	up	K08735	ko03430	IAA	2.16008	up	Indole-3-acetic acid	C00954	ko00380,ko01100,ko04075	0.844716	1.03178e-05	3
Cluster-107741.90	7.31146	up	--	--	IAA	2.16008	up	Indole-3-acetic acid	C00954	ko00380,ko01100,ko04075	0.809162	4.76661e-05	3
Cluster-107742.0	2.75564	up	--	--	IAA	2.16008	up	Indole-3-acetic acid	C00954	ko00380,ko01100,ko04075	0.886799	9.45214e-07	3
Cluster-107809.2	12.3973	up	--	--	IAA	2.16008	up	Indole-3-acetic acid	C00954	ko00380,ko01100,ko04075	0.853961	6.51078e-06	3
Cluster-107849.0	1.62896	up	--	--	IAA	2.16008	up	Indole-3-acetic acid	C00954	ko00380,ko01100,ko04075	0.899757	3.72794e-07	3
Cluster-107865.2	10.2036	up	--	--	IAA	2.16008	up	Indole-3-acetic acid	C00954	ko00380,ko01100,ko04075	0.868779	2.90485e-06	3
Cluster-107914.0	4.306	up	--	--	IAA	2.16008	up	Indole-3-acetic acid	C00954	ko00380,ko01100,ko04075	0.899968	3.66816e-07	3
Cluster-107916.2	3.49779	up	K02639	ko00195,ko01100	IAA	2.16008	up	Indole-3-acetic acid	C00954	ko00380,ko01100,ko04075	0.847356	9.0746e-06	3
Cluster-107978.0	7.03005	up	--	--	IAA	2.16008	up	Indole-3-acetic acid	C00954	ko00380,ko01100,ko04075	0.852116	7.15474e-06	3
Cluster-107978.1	10.5928	up	--	--	IAA	2.16008	up	Indole-3-acetic acid	C00954	ko00380,ko01100,ko04075	0.864734	3.6546e-06	3
Cluster-107978.4	10.1018	up	--	--	IAA	2.16008	up	Indole-3-acetic acid	C00954	ko00380,ko01100,ko04075	0.849066	8.33972e-06	3
Cluster-108012.0	5.64567	up	K05681	ko02010	IAA	2.16008	up	Indole-3-acetic acid	C00954	ko00380,ko01100,ko04075	0.843308	1.10388e-05	3
Cluster-108012.1	10.3918	up	K05681	ko02010	IAA	2.16008	up	Indole-3-acetic acid	C00954	ko00380,ko01100,ko04075	0.896629	4.71867e-07	3
Cluster-108030.2	2.24954	up	K10258	ko00062,ko01040,ko01100,ko01110,ko01212	IAA	2.16008	up	Indole-3-acetic acid	C00954	ko00380,ko01100,ko04075	0.827783	2.23192e-05	3
Cluster-108040.1	8.01062	up	--	--	IAA	2.16008	up	Indole-3-acetic acid	C00954	ko00380,ko01100,ko04075	0.866128	3.37929e-06	3
Cluster-108040.2	10.5261	up	--	--	IAA	2.16008	up	Indole-3-acetic acid	C00954	ko00380,ko01100,ko04075	0.802133	6.21691e-05	3
Cluster-108056.0	2.77078	up	--	--	IAA	2.16008	up	Indole-3-acetic acid	C00954	ko00380,ko01100,ko04075	0.896081	4.91375e-07	3
Cluster-108072.1	8.41283	up	--	--	IAA	2.16008	up	Indole-3-acetic acid	C00954	ko00380,ko01100,ko04075	0.857402	5.44159e-06	3
Cluster-108103.0	4.25586	up	K06269	ko03015	IAA	2.16008	up	Indole-3-acetic acid	C00954	ko00380,ko01100,ko04075	0.855032	6.16011e-06	3
Cluster-108167.0	2.96312	up	--	--	IAA	2.16008	up	Indole-3-acetic acid	C00954	ko00380,ko01100,ko04075	0.879886	1.48484e-06	3
Cluster-108229.3	4.57215	up	--	--	IAA	2.16008	up	Indole-3-acetic acid	C00954	ko00380,ko01100,ko04075	0.853322	6.72784e-06	3
Cluster-10830.12	3.58924	up	--	--	IAA	2.16008	up	Indole-3-acetic acid	C00954	ko00380,ko01100,ko04075	0.820771	2.99999e-05	3
Cluster-108311.3	5.8367	up	K06688	ko04120	IAA	2.16008	up	Indole-3-acetic acid	C00954	ko00380,ko01100,ko04075	0.89545	5.14699e-07	3
Cluster-108316.0	6.63082	up	--	--	IAA	2.16008	up	Indole-3-acetic acid	C00954	ko00380,ko01100,ko04075	0.814507	3.86668e-05	3
Cluster-108318.1	2.15602	up	--	--	IAA	2.16008	up	Indole-3-acetic acid	C00954	ko00380,ko01100,ko04075	0.877871	1.68499e-06	3
Cluster-108342.1	7.15086	up	--	--	IAA	2.16008	up	Indole-3-acetic acid	C00954	ko00380,ko01100,ko04075	0.800296	6.65244e-05	3
Cluster-108429.1	4.15522	up	--	--	IAA	2.16008	up	Indole-3-acetic acid	C00954	ko00380,ko01100,ko04075	0.844179	1.0588e-05	3
Cluster-108445.0	3.67002	up	--	--	IAA	2.16008	up	Indole-3-acetic acid	C00954	ko00380,ko01100,ko04075	0.837379	1.45674e-05	3
Cluster-108529.2	4.26942	up	K00679	ko00561,ko01100	IAA	2.16008	up	Indole-3-acetic acid	C00954	ko00380,ko01100,ko04075	0.849281	8.25095e-06	3
Cluster-108544.10	3.47332	up	--	--	IAA	2.16008	up	Indole-3-acetic acid	C00954	ko00380,ko01100,ko04075	0.82398	2.62443e-05	3
Cluster-108544.4	4.21714	up	--	--	IAA	2.16008	up	Indole-3-acetic acid	C00954	ko00380,ko01100,ko04075	0.84442	1.04658e-05	3
Cluster-108544.5	10.6186	up	--	--	IAA	2.16008	up	Indole-3-acetic acid	C00954	ko00380,ko01100,ko04075	0.899018	3.94398e-07	3
Cluster-108544.6	10.3159	up	--	--	IAA	2.16008	up	Indole-3-acetic acid	C00954	ko00380,ko01100,ko04075	0.899311	3.85718e-07	3
Cluster-108581.0	1.47809	up	K02115	ko00190,ko00195,ko01100	IAA	2.16008	up	Indole-3-acetic acid	C00954	ko00380,ko01100,ko04075	0.854459	6.3456e-06	3
Cluster-108613.5	2.19151	up	--	--	IAA	2.16008	up	Indole-3-acetic acid	C00954	ko00380,ko01100,ko04075	0.80365	5.87571e-05	3
Cluster-108613.8	3.54762	insig	--	--	IAA	2.16008	up	Indole-3-acetic acid	C00954	ko00380,ko01100,ko04075	0.808271	4.93282e-05	3
Cluster-108649.0	4.92593	up	--	--	IAA	2.16008	up	Indole-3-acetic acid	C00954	ko00380,ko01100,ko04075	0.839112	1.34486e-05	3
Cluster-108705.0	1.83484	up	--	--	IAA	2.16008	up	Indole-3-acetic acid	C00954	ko00380,ko01100,ko04075	0.83839	1.39055e-05	3
Cluster-108749.2	2.19741	up	--	--	IAA	2.16008	up	Indole-3-acetic acid	C00954	ko00380,ko01100,ko04075	0.840733	1.24687e-05	3
Cluster-108761.1	4.24078	up	--	--	IAA	2.16008	up	Indole-3-acetic acid	C00954	ko00380,ko01100,ko04075	0.823774	2.64727e-05	3
Cluster-108814.0	6.81956	up	--	--	IAA	2.16008	up	Indole-3-acetic acid	C00954	ko00380,ko01100,ko04075	0.826033	2.40582e-05	3
Cluster-108834.0	7.17112	up	--	--	IAA	2.16008	up	Indole-3-acetic acid	C00954	ko00380,ko01100,ko04075	0.850131	7.90823e-06	3
Cluster-108858.1	11.3781	up	--	--	IAA	2.16008	up	Indole-3-acetic acid	C00954	ko00380,ko01100,ko04075	0.871793	2.43607e-06	3
Cluster-108858.3	6.83269	up	--	--	IAA	2.16008	up	Indole-3-acetic acid	C00954	ko00380,ko01100,ko04075	0.830804	1.95688e-05	3
Cluster-109092.4	9.02479	up	--	--	IAA	2.16008	up	Indole-3-acetic acid	C00954	ko00380,ko01100,ko04075	0.820129	3.0804e-05	3
Cluster-109167.1	7.07603	up	--	--	IAA	2.16008	up	Indole-3-acetic acid	C00954	ko00380,ko01100,ko04075	0.838357	1.39266e-05	3
Cluster-109169.12	7.65829	up	--	--	IAA	2.16008	up	Indole-3-acetic acid	C00954	ko00380,ko01100,ko04075	0.814804	3.82126e-05	3
Cluster-109190.0	1.67082	up	--	--	IAA	2.16008	up	Indole-3-acetic acid	C00954	ko00380,ko01100,ko04075	0.865937	3.4159e-06	3
Cluster-109207.2	2.15514	up	K04374	ko04141	IAA	2.16008	up	Indole-3-acetic acid	C00954	ko00380,ko01100,ko04075	0.842537	1.14514e-05	3
Cluster-109236.4	7.72536	up	--	--	IAA	2.16008	up	Indole-3-acetic acid	C00954	ko00380,ko01100,ko04075	0.841479	1.20394e-05	3
Cluster-109239.10	7.03165	up	--	--	IAA	2.16008	up	Indole-3-acetic acid	C00954	ko00380,ko01100,ko04075	0.824347	2.58411e-05	3
Cluster-109260.0	1.65452	up	--	--	IAA	2.16008	up	Indole-3-acetic acid	C00954	ko00380,ko01100,ko04075	0.829115	2.10683e-05	3
Cluster-109303.0	13.214	up	K01897	ko00061,ko00071,ko01100,ko01212,ko04146	IAA	2.16008	up	Indole-3-acetic acid	C00954	ko00380,ko01100,ko04075	0.876074	1.88282e-06	3
Cluster-109313.2	7.54336	up	K17839	ko00330,ko00410,ko00770,ko01100	IAA	2.16008	up	Indole-3-acetic acid	C00954	ko00380,ko01100,ko04075	0.818276	3.32297e-05	3
Cluster-109447.2	3.04559	up	K03097	ko03008,ko04712	IAA	2.16008	up	Indole-3-acetic acid	C00954	ko00380,ko01100,ko04075	0.841052	1.22838e-05	3
Cluster-109588.59	7.37961	up	K04646	ko04144	IAA	2.16008	up	Indole-3-acetic acid	C00954	ko00380,ko01100,ko04075	0.836782	1.49715e-05	3
Cluster-109600.0	9.15805	up	--	--	IAA	2.16008	up	Indole-3-acetic acid	C00954	ko00380,ko01100,ko04075	0.858619	5.1015e-06	3
Cluster-109654.0	1.62221	up	--	--	IAA	2.16008	up	Indole-3-acetic acid	C00954	ko00380,ko01100,ko04075	0.860048	4.72558e-06	3
Cluster-10969.4	7.65837	up	--	--	IAA	2.16008	up	Indole-3-acetic acid	C00954	ko00380,ko01100,ko04075	0.847768	8.89259e-06	3
Cluster-109694.0	8.80465	up	K05349	ko00460,ko00500,ko00999,ko01100,ko01110	IAA	2.16008	up	Indole-3-acetic acid	C00954	ko00380,ko01100,ko04075	0.844896	1.02288e-05	3
Cluster-109694.2	3.80696	up	K05349	ko00460,ko00500,ko00999,ko01100,ko01110	IAA	2.16008	up	Indole-3-acetic acid	C00954	ko00380,ko01100,ko04075	0.848186	8.7111e-06	3
Cluster-109694.7	2.7288	up	K05349	ko00460,ko00500,ko00999,ko01100,ko01110	IAA	2.16008	up	Indole-3-acetic acid	C00954	ko00380,ko01100,ko04075	0.804057	5.78702e-05	3
Cluster-109783.6	1.0395	up	K14407	ko03015	IAA	2.16008	up	Indole-3-acetic acid	C00954	ko00380,ko01100,ko04075	0.841103	1.22543e-05	3
Cluster-109837.0	8.50488	up	--	--	IAA	2.16008	up	Indole-3-acetic acid	C00954	ko00380,ko01100,ko04075	0.81578	3.67511e-05	3
Cluster-109909.1	5.80406	up	--	--	IAA	2.16008	up	Indole-3-acetic acid	C00954	ko00380,ko01100,ko04075	0.89181	6.68853e-07	3
Cluster-109917.4	2.02599	up	--	--	IAA	2.16008	up	Indole-3-acetic acid	C00954	ko00380,ko01100,ko04075	0.806037	5.37113e-05	3
Cluster-109917.5	2.32127	up	--	--	IAA	2.16008	up	Indole-3-acetic acid	C00954	ko00380,ko01100,ko04075	0.856742	5.63429e-06	3
Cluster-110164.100	10.5283	up	--	--	IAA	2.16008	up	Indole-3-acetic acid	C00954	ko00380,ko01100,ko04075	0.870107	2.68953e-06	3
Cluster-110164.103	10.6594	up	--	--	IAA	2.16008	up	Indole-3-acetic acid	C00954	ko00380,ko01100,ko04075	0.866697	3.27231e-06	3
Cluster-110164.104	7.48991	up	--	--	IAA	2.16008	up	Indole-3-acetic acid	C00954	ko00380,ko01100,ko04075	0.912779	1.27737e-07	3
Cluster-110164.11	7.50372	up	--	--	IAA	2.16008	up	Indole-3-acetic acid	C00954	ko00380,ko01100,ko04075	0.886774	9.46819e-07	3
Cluster-110164.63	10.806	up	--	--	IAA	2.16008	up	Indole-3-acetic acid	C00954	ko00380,ko01100,ko04075	0.909226	1.73796e-07	3
Cluster-110164.64	4.5385	up	--	--	IAA	2.16008	up	Indole-3-acetic acid	C00954	ko00380,ko01100,ko04075	0.821852	2.86869e-05	3
Cluster-110164.65	13.3589	up	--	--	IAA	2.16008	up	Indole-3-acetic acid	C00954	ko00380,ko01100,ko04075	0.828686	2.14643e-05	3
Cluster-110164.67	9.74248	up	--	--	IAA	2.16008	up	Indole-3-acetic acid	C00954	ko00380,ko01100,ko04075	0.876383	1.84748e-06	3
Cluster-110164.71	3.25962	up	--	--	IAA	2.16008	up	Indole-3-acetic acid	C00954	ko00380,ko01100,ko04075	0.87894	1.57612e-06	3
Cluster-110164.72	3.48194	up	--	--	IAA	2.16008	up	Indole-3-acetic acid	C00954	ko00380,ko01100,ko04075	0.901947	3.14632e-07	3
Cluster-110164.73	5.64046	up	--	--	IAA	2.16008	up	Indole-3-acetic acid	C00954	ko00380,ko01100,ko04075	0.889156	8.04971e-07	3
Cluster-110164.75	2.83459	up	--	--	IAA	2.16008	up	Indole-3-acetic acid	C00954	ko00380,ko01100,ko04075	0.866393	3.32917e-06	3
Cluster-110164.76	3.95605	up	--	--	IAA	2.16008	up	Indole-3-acetic acid	C00954	ko00380,ko01100,ko04075	0.866879	3.23867e-06	3
Cluster-110164.79	6.18654	up	--	--	IAA	2.16008	up	Indole-3-acetic acid	C00954	ko00380,ko01100,ko04075	0.900487	3.52461e-07	3
Cluster-110164.80	12.3787	up	--	--	IAA	2.16008	up	Indole-3-acetic acid	C00954	ko00380,ko01100,ko04075	0.882931	1.22118e-06	3
Cluster-110164.82	3.6774	up	--	--	IAA	2.16008	up	Indole-3-acetic acid	C00954	ko00380,ko01100,ko04075	0.903456	2.79289e-07	3
Cluster-110164.83	5.78252	up	--	--	IAA	2.16008	up	Indole-3-acetic acid	C00954	ko00380,ko01100,ko04075	0.916013	9.54022e-08	3
Cluster-110164.84	4.5821	up	--	--	IAA	2.16008	up	Indole-3-acetic acid	C00954	ko00380,ko01100,ko04075	0.876017	1.88934e-06	3
Cluster-110164.85	10.9743	up	--	--	IAA	2.16008	up	Indole-3-acetic acid	C00954	ko00380,ko01100,ko04075	0.91673	8.92831e-08	3
Cluster-110164.89	7.41819	up	--	--	IAA	2.16008	up	Indole-3-acetic acid	C00954	ko00380,ko01100,ko04075	0.898411	4.12972e-07	3
Cluster-110164.90	6.88456	up	--	--	IAA	2.16008	up	Indole-3-acetic acid	C00954	ko00380,ko01100,ko04075	0.83468	1.64693e-05	3
Cluster-110164.91	4.74642	up	--	--	IAA	2.16008	up	Indole-3-acetic acid	C00954	ko00380,ko01100,ko04075	0.864162	3.77297e-06	3
Cluster-110164.93	6.11673	up	--	--	IAA	2.16008	up	Indole-3-acetic acid	C00954	ko00380,ko01100,ko04075	0.816725	3.53827e-05	3
Cluster-110164.94	2.89585	up	--	--	IAA	2.16008	up	Indole-3-acetic acid	C00954	ko00380,ko01100,ko04075	0.816083	3.63071e-05	3
Cluster-110164.95	3.87875	up	--	--	IAA	2.16008	up	Indole-3-acetic acid	C00954	ko00380,ko01100,ko04075	0.89822	4.18966e-07	3
Cluster-110164.97	4.18731	up	--	--	IAA	2.16008	up	Indole-3-acetic acid	C00954	ko00380,ko01100,ko04075	0.911142	1.47436e-07	3
Cluster-110165.1	12.0051	up	K22772	ko00944,ko01110	IAA	2.16008	up	Indole-3-acetic acid	C00954	ko00380,ko01100,ko04075	0.831307	1.91402e-05	3
Cluster-110218.1	1.95024	up	--	--	IAA	2.16008	up	Indole-3-acetic acid	C00954	ko00380,ko01100,ko04075	0.828388	2.17434e-05	3
Cluster-110259.0	1.52886	up	--	--	IAA	2.16008	up	Indole-3-acetic acid	C00954	ko00380,ko01100,ko04075	0.814937	3.801e-05	3
Cluster-110311.11	1.79638	up	--	--	IAA	2.16008	up	Indole-3-acetic acid	C00954	ko00380,ko01100,ko04075	0.846539	9.44449e-06	3
Cluster-110311.4	2.39671	up	--	--	IAA	2.16008	up	Indole-3-acetic acid	C00954	ko00380,ko01100,ko04075	0.84272	1.13521e-05	3
Cluster-110311.9	5.38195	up	K00423	ko00053,ko01100	IAA	2.16008	up	Indole-3-acetic acid	C00954	ko00380,ko01100,ko04075	0.845748	9.81557e-06	3
Cluster-110323.2	10.7897	up	--	--	IAA	2.16008	up	Indole-3-acetic acid	C00954	ko00380,ko01100,ko04075	0.836172	1.53936e-05	3
Cluster-110349.1	10.0248	up	--	--	IAA	2.16008	up	Indole-3-acetic acid	C00954	ko00380,ko01100,ko04075	0.828199	2.19213e-05	3
Cluster-110417.0	8.04329	up	--	--	IAA	2.16008	up	Indole-3-acetic acid	C00954	ko00380,ko01100,ko04075	0.824276	2.59181e-05	3
Cluster-110485.1	11.3935	up	--	--	IAA	2.16008	up	Indole-3-acetic acid	C00954	ko00380,ko01100,ko04075	0.897127	4.547e-07	3
Cluster-110505.1	6.47813	up	K02113	ko00190,ko00195,ko01100	IAA	2.16008	up	Indole-3-acetic acid	C00954	ko00380,ko01100,ko04075	0.82945	2.07637e-05	3
Cluster-110527.0	4.17373	up	--	--	IAA	2.16008	up	Indole-3-acetic acid	C00954	ko00380,ko01100,ko04075	0.853269	6.74621e-06	3
Cluster-110527.3	13.9251	up	--	--	IAA	2.16008	up	Indole-3-acetic acid	C00954	ko00380,ko01100,ko04075	0.824954	2.51866e-05	3
Cluster-110567.2	2.13666	up	K12135	ko04712	IAA	2.16008	up	Indole-3-acetic acid	C00954	ko00380,ko01100,ko04075	0.813745	3.98534e-05	3
Cluster-110654.1	4.10817	up	K16221	ko04712	IAA	2.16008	up	Indole-3-acetic acid	C00954	ko00380,ko01100,ko04075	0.872001	2.40632e-06	3
Cluster-110802.0	2.25863	up	--	--	IAA	2.16008	up	Indole-3-acetic acid	C00954	ko00380,ko01100,ko04075	0.814125	3.92587e-05	3
Cluster-110802.22	12.4624	up	--	--	IAA	2.16008	up	Indole-3-acetic acid	C00954	ko00380,ko01100,ko04075	0.823475	2.68068e-05	3
Cluster-110802.34	6.30672	up	--	--	IAA	2.16008	up	Indole-3-acetic acid	C00954	ko00380,ko01100,ko04075	0.825569	2.45381e-05	3
Cluster-110802.9	8.71852	up	--	--	IAA	2.16008	up	Indole-3-acetic acid	C00954	ko00380,ko01100,ko04075	0.844694	1.03287e-05	3
Cluster-110882.3	6.10002	up	K05391	ko04626	IAA	2.16008	up	Indole-3-acetic acid	C00954	ko00380,ko01100,ko04075	0.844429	1.04616e-05	3
Cluster-110986.1	4.20019	up	--	--	IAA	2.16008	up	Indole-3-acetic acid	C00954	ko00380,ko01100,ko04075	0.837282	1.46326e-05	3
Cluster-110999.0	4.6591	up	--	--	IAA	2.16008	up	Indole-3-acetic acid	C00954	ko00380,ko01100,ko04075	0.901382	3.2883e-07	3
Cluster-111056.2	6.82546	up	K02146	ko00190,ko01100,ko04145	IAA	2.16008	up	Indole-3-acetic acid	C00954	ko00380,ko01100,ko04075	0.81159	4.33799e-05	3
Cluster-111074.3	4.93377	up	--	--	IAA	2.16008	up	Indole-3-acetic acid	C00954	ko00380,ko01100,ko04075	0.814136	3.924e-05	3
Cluster-111079.0	5.76264	up	K08912	ko00196,ko01100	IAA	2.16008	up	Indole-3-acetic acid	C00954	ko00380,ko01100,ko04075	0.863103	4.0008e-06	3
Cluster-111119.0	1.65074	up	--	--	IAA	2.16008	up	Indole-3-acetic acid	C00954	ko00380,ko01100,ko04075	0.866613	3.2879e-06	3
Cluster-111126.0	4.02277	up	K07407	ko00052,ko00561,ko00600,ko00603,ko01100	IAA	2.16008	up	Indole-3-acetic acid	C00954	ko00380,ko01100,ko04075	0.907577	1.99659e-07	3
Cluster-111129.5	3.11626	up	--	--	IAA	2.16008	up	Indole-3-acetic acid	C00954	ko00380,ko01100,ko04075	0.826728	2.3354e-05	3
Cluster-111129.7	3.63271	up	--	--	IAA	2.16008	up	Indole-3-acetic acid	C00954	ko00380,ko01100,ko04075	0.822175	2.83039e-05	3
Cluster-111158.6	3.80325	up	K12812	ko03013,ko03015,ko03040	IAA	2.16008	up	Indole-3-acetic acid	C00954	ko00380,ko01100,ko04075	0.851576	7.35334e-06	3
Cluster-111188.6	7.24444	up	--	--	IAA	2.16008	up	Indole-3-acetic acid	C00954	ko00380,ko01100,ko04075	0.823412	2.68778e-05	3
Cluster-111192.2	10.2655	up	--	--	IAA	2.16008	up	Indole-3-acetic acid	C00954	ko00380,ko01100,ko04075	0.875856	1.90811e-06	3
Cluster-11122.38	7.10469	up	K04802	ko03030,ko03410,ko03420,ko03430	IAA	2.16008	up	Indole-3-acetic acid	C00954	ko00380,ko01100,ko04075	0.890557	7.30386e-07	3
Cluster-11122.39	2.10047	up	K04802	ko03030,ko03410,ko03420,ko03430	IAA	2.16008	up	Indole-3-acetic acid	C00954	ko00380,ko01100,ko04075	0.870171	2.67962e-06	3
Cluster-111248.3	3.23721	up	--	--	IAA	2.16008	up	Indole-3-acetic acid	C00954	ko00380,ko01100,ko04075	0.864343	3.73522e-06	3
Cluster-111345.2	6.2277	up	--	--	IAA	2.16008	up	Indole-3-acetic acid	C00954	ko00380,ko01100,ko04075	0.884548	1.09837e-06	3
Cluster-111352.0	2.11275	up	--	--	IAA	2.16008	up	Indole-3-acetic acid	C00954	ko00380,ko01100,ko04075	0.824606	2.556e-05	3
Cluster-111354.0	3.15096	up	--	--	IAA	2.16008	up	Indole-3-acetic acid	C00954	ko00380,ko01100,ko04075	0.902536	3.004e-07	3
Cluster-111414.0	9.67847	up	--	--	IAA	2.16008	up	Indole-3-acetic acid	C00954	ko00380,ko01100,ko04075	0.834026	1.69605e-05	3
Cluster-111414.3	6.85576	up	--	--	IAA	2.16008	up	Indole-3-acetic acid	C00954	ko00380,ko01100,ko04075	0.84518	1.00894e-05	3
Cluster-111505.61	7.24118	up	K00963	ko00040,ko00052,ko00500,ko00520,ko01100,ko01110,ko01240,ko01250	IAA	2.16008	up	Indole-3-acetic acid	C00954	ko00380,ko01100,ko04075	0.854421	6.35822e-06	3
Cluster-111613.0	2.03567	up	K10532	ko00531,ko01100	IAA	2.16008	up	Indole-3-acetic acid	C00954	ko00380,ko01100,ko04075	0.870083	2.69332e-06	3
Cluster-111651.0	1.66054	up	--	--	IAA	2.16008	up	Indole-3-acetic acid	C00954	ko00380,ko01100,ko04075	0.831646	1.88566e-05	3
Cluster-111734.3	8.90687	up	--	--	IAA	2.16008	up	Indole-3-acetic acid	C00954	ko00380,ko01100,ko04075	0.805293	5.5244e-05	3
Cluster-111784.1	9.3961	up	K15405	ko00073,ko01110	IAA	2.16008	up	Indole-3-acetic acid	C00954	ko00380,ko01100,ko04075	0.849113	8.32012e-06	3
Cluster-111796.0	1.21054	up	--	--	IAA	2.16008	up	Indole-3-acetic acid	C00954	ko00380,ko01100,ko04075	0.803842	5.83373e-05	3
Cluster-111796.6	10.4496	up	--	--	IAA	2.16008	up	Indole-3-acetic acid	C00954	ko00380,ko01100,ko04075	0.916481	9.13658e-08	3
Cluster-111812.4	10.9197	up	--	--	IAA	2.16008	up	Indole-3-acetic acid	C00954	ko00380,ko01100,ko04075	0.88989	7.6508e-07	3
Cluster-111812.6	9.00057	up	--	--	IAA	2.16008	up	Indole-3-acetic acid	C00954	ko00380,ko01100,ko04075	0.847668	8.93628e-06	3
Cluster-111828.3	9.89324	up	--	--	IAA	2.16008	up	Indole-3-acetic acid	C00954	ko00380,ko01100,ko04075	0.855183	6.11229e-06	3
Cluster-111883.0	10.9286	up	K10256	ko01040,ko01100,ko01212	IAA	2.16008	up	Indole-3-acetic acid	C00954	ko00380,ko01100,ko04075	0.906238	2.23041e-07	3
Cluster-111900.0	2.62604	up	--	--	IAA	2.16008	up	Indole-3-acetic acid	C00954	ko00380,ko01100,ko04075	0.835505	1.58664e-05	3
Cluster-111933.0	2.94593	up	--	--	IAA	2.16008	up	Indole-3-acetic acid	C00954	ko00380,ko01100,ko04075	0.805012	5.58302e-05	3
Cluster-111940.2	9.20712	up	K00695	ko00500,ko01100,ko01110	IAA	2.16008	up	Indole-3-acetic acid	C00954	ko00380,ko01100,ko04075	0.876054	1.88516e-06	3
Cluster-111945.1	5.92283	up	--	--	IAA	2.16008	up	Indole-3-acetic acid	C00954	ko00380,ko01100,ko04075	0.845087	1.01348e-05	3
Cluster-111956.0	3.99094	up	--	--	IAA	2.16008	up	Indole-3-acetic acid	C00954	ko00380,ko01100,ko04075	0.952627	1.0988e-09	3
Cluster-111984.1	9.83918	up	--	--	IAA	2.16008	up	Indole-3-acetic acid	C00954	ko00380,ko01100,ko04075	0.838027	1.41402e-05	3
Cluster-112035.1	8.56062	up	--	--	IAA	2.16008	up	Indole-3-acetic acid	C00954	ko00380,ko01100,ko04075	0.822482	2.7944e-05	3
Cluster-112051.0	3.90936	up	--	--	IAA	2.16008	up	Indole-3-acetic acid	C00954	ko00380,ko01100,ko04075	0.871246	2.51598e-06	3
Cluster-112051.5	9.21302	up	--	--	IAA	2.16008	up	Indole-3-acetic acid	C00954	ko00380,ko01100,ko04075	0.895605	5.08869e-07	3
Cluster-112073.2	10.8589	up	K00688	ko00500,ko01100,ko01110	IAA	2.16008	up	Indole-3-acetic acid	C00954	ko00380,ko01100,ko04075	0.803603	5.88598e-05	3
Cluster-112144.1	9.57689	up	K00472	ko00330,ko01100	IAA	2.16008	up	Indole-3-acetic acid	C00954	ko00380,ko01100,ko04075	0.832758	1.79496e-05	3
Cluster-112144.7	4.7617	up	K00472	ko00330,ko01100	IAA	2.16008	up	Indole-3-acetic acid	C00954	ko00380,ko01100,ko04075	0.85214	7.14618e-06	3
Cluster-112161.0	8.04534	up	--	--	IAA	2.16008	up	Indole-3-acetic acid	C00954	ko00380,ko01100,ko04075	0.805629	5.45474e-05	3
Cluster-112198.1	11.6946	up	K02183	ko04016,ko04070,ko04626	IAA	2.16008	up	Indole-3-acetic acid	C00954	ko00380,ko01100,ko04075	0.851027	7.56026e-06	3
Cluster-112203.1	1.47297	up	--	--	IAA	2.16008	up	Indole-3-acetic acid	C00954	ko00380,ko01100,ko04075	0.909162	1.7474e-07	3
Cluster-112289.1	10.3349	up	--	--	IAA	2.16008	up	Indole-3-acetic acid	C00954	ko00380,ko01100,ko04075	0.857498	5.41416e-06	3
Cluster-112324.1	9.50605	up	--	--	IAA	2.16008	up	Indole-3-acetic acid	C00954	ko00380,ko01100,ko04075	0.85543	6.03415e-06	3
Cluster-112324.2	12.7165	up	--	--	IAA	2.16008	up	Indole-3-acetic acid	C00954	ko00380,ko01100,ko04075	0.876244	1.86328e-06	3
Cluster-112410.5	4.0558	up	--	--	IAA	2.16008	up	Indole-3-acetic acid	C00954	ko00380,ko01100,ko04075	0.832307	1.83129e-05	3
Cluster-112427.1	8.77658	up	K01581	ko00330,ko00480,ko01100,ko01110	IAA	2.16008	up	Indole-3-acetic acid	C00954	ko00380,ko01100,ko04075	0.811175	4.40875e-05	3
Cluster-112433.1	2.23856	up	--	--	IAA	2.16008	up	Indole-3-acetic acid	C00954	ko00380,ko01100,ko04075	0.855763	5.93035e-06	3
Cluster-112600.4	6.54672	up	K12823	ko03040	IAA	2.16008	up	Indole-3-acetic acid	C00954	ko00380,ko01100,ko04075	0.83077	1.95985e-05	3
Cluster-112600.6	9.87547	up	K12823	ko03040	IAA	2.16008	up	Indole-3-acetic acid	C00954	ko00380,ko01100,ko04075	0.8431	1.11486e-05	3
Cluster-112625.1	4.85742	up	--	--	IAA	2.16008	up	Indole-3-acetic acid	C00954	ko00380,ko01100,ko04075	0.80333	5.94644e-05	3
Cluster-112634.0	7.56143	up	K13249	ko04141	IAA	2.16008	up	Indole-3-acetic acid	C00954	ko00380,ko01100,ko04075	0.859618	4.83615e-06	3
Cluster-112634.3	8.45322	up	K13249	ko04141	IAA	2.16008	up	Indole-3-acetic acid	C00954	ko00380,ko01100,ko04075	0.866868	3.24074e-06	3
Cluster-112649.0	2.29788	up	K02320	ko03030	IAA	2.16008	up	Indole-3-acetic acid	C00954	ko00380,ko01100,ko04075	0.849313	8.23777e-06	3
Cluster-112681.15	9.06811	up	--	--	IAA	2.16008	up	Indole-3-acetic acid	C00954	ko00380,ko01100,ko04075	0.837458	1.4515e-05	3
Cluster-112681.25	9.55162	up	K12309	ko00052,ko00511,ko00531,ko00600,ko00604,ko01100	IAA	2.16008	up	Indole-3-acetic acid	C00954	ko00380,ko01100,ko04075	0.824402	2.57813e-05	3
Cluster-112681.73	7.67102	up	--	--	IAA	2.16008	up	Indole-3-acetic acid	C00954	ko00380,ko01100,ko04075	0.830601	1.97443e-05	3
Cluster-112681.91	8.39493	up	K10583	ko04120	IAA	2.16008	up	Indole-3-acetic acid	C00954	ko00380,ko01100,ko04075	0.800676	6.56022e-05	3
Cluster-112710.1	5.77543	up	--	--	IAA	2.16008	up	Indole-3-acetic acid	C00954	ko00380,ko01100,ko04075	0.80627	5.32393e-05	3
Cluster-112734.0	3.72512	up	K17212	ko00945,ko01110	IAA	2.16008	up	Indole-3-acetic acid	C00954	ko00380,ko01100,ko04075	0.803745	5.85484e-05	3
Cluster-112746.11	10.1919	up	--	--	IAA	2.16008	up	Indole-3-acetic acid	C00954	ko00380,ko01100,ko04075	0.872257	2.37009e-06	3
Cluster-112746.18	8.98272	up	--	--	IAA	2.16008	up	Indole-3-acetic acid	C00954	ko00380,ko01100,ko04075	0.855589	5.9844e-06	3
Cluster-112746.3	9.53777	up	--	--	IAA	2.16008	up	Indole-3-acetic acid	C00954	ko00380,ko01100,ko04075	0.899126	3.9118e-07	3
Cluster-112746.6	13.1195	up	--	--	IAA	2.16008	up	Indole-3-acetic acid	C00954	ko00380,ko01100,ko04075	0.910457	1.56434e-07	3
Cluster-112750.6	1.99563	up	--	--	IAA	2.16008	up	Indole-3-acetic acid	C00954	ko00380,ko01100,ko04075	0.849545	8.14299e-06	3
Cluster-112751.0	10.4947	up	--	--	IAA	2.16008	up	Indole-3-acetic acid	C00954	ko00380,ko01100,ko04075	0.899645	3.75993e-07	3
Cluster-112787.0	2.33531	up	K01728	ko00040,ko01100	IAA	2.16008	up	Indole-3-acetic acid	C00954	ko00380,ko01100,ko04075	0.869584	2.77267e-06	3
Cluster-112847.2	4.43652	up	K00901	ko00561,ko00564,ko01100,ko01110,ko04070	IAA	2.16008	up	Indole-3-acetic acid	C00954	ko00380,ko01100,ko04075	0.856484	5.71111e-06	3
Cluster-112968.6	7.13037	up	--	--	IAA	2.16008	up	Indole-3-acetic acid	C00954	ko00380,ko01100,ko04075	0.81523	3.75683e-05	3
Cluster-113032.0	2.0275	up	--	--	IAA	2.16008	up	Indole-3-acetic acid	C00954	ko00380,ko01100,ko04075	0.843485	1.09457e-05	3
Cluster-113087.5	8.33232	up	K13946	ko04075	IAA	2.16008	up	Indole-3-acetic acid	C00954	ko00380,ko01100,ko04075	0.828949	2.12209e-05	3
Cluster-113091.3	10.0769	up	--	--	IAA	2.16008	up	Indole-3-acetic acid	C00954	ko00380,ko01100,ko04075	0.895399	5.16615e-07	3
Cluster-113091.9	8.53947	up	--	--	IAA	2.16008	up	Indole-3-acetic acid	C00954	ko00380,ko01100,ko04075	0.859132	4.96375e-06	3
Cluster-113148.1	4.30866	up	K14332	ko00195,ko01100	IAA	2.16008	up	Indole-3-acetic acid	C00954	ko00380,ko01100,ko04075	0.869928	2.71776e-06	3
Cluster-113148.2	3.80074	up	K14332	ko00195,ko01100	IAA	2.16008	up	Indole-3-acetic acid	C00954	ko00380,ko01100,ko04075	0.878975	1.57263e-06	3
Cluster-113281.14	7.05611	up	K09490	ko03060,ko04141	IAA	2.16008	up	Indole-3-acetic acid	C00954	ko00380,ko01100,ko04075	0.816573	3.55997e-05	3
Cluster-113313.2	1.67128	up	--	--	IAA	2.16008	up	Indole-3-acetic acid	C00954	ko00380,ko01100,ko04075	0.829326	2.08758e-05	3
Cluster-113313.4	3.31292	up	--	--	IAA	2.16008	up	Indole-3-acetic acid	C00954	ko00380,ko01100,ko04075	0.902656	2.97574e-07	3
Cluster-113337.5	7.76234	up	--	--	IAA	2.16008	up	Indole-3-acetic acid	C00954	ko00380,ko01100,ko04075	0.815366	3.73652e-05	3
Cluster-113419.1	10.2621	up	--	--	IAA	2.16008	up	Indole-3-acetic acid	C00954	ko00380,ko01100,ko04075	0.817624	3.41195e-05	3
Cluster-113419.2	5.00485	up	--	--	IAA	2.16008	up	Indole-3-acetic acid	C00954	ko00380,ko01100,ko04075	0.865573	3.48669e-06	3
Cluster-11350.2	4.29083	up	K01179	ko00500,ko01100	IAA	2.16008	up	Indole-3-acetic acid	C00954	ko00380,ko01100,ko04075	0.855526	6.00427e-06	3
Cluster-11350.33	12.0113	up	K01179	ko00500,ko01100	IAA	2.16008	up	Indole-3-acetic acid	C00954	ko00380,ko01100,ko04075	0.851137	7.51813e-06	3
Cluster-113514.1	8.1432	up	K00128	ko00010,ko00053,ko00071,ko00280,ko00310,ko00330,ko00340,ko00380,ko00410,ko00561,ko00620,ko00770,ko00903,ko01100,ko01110,ko01240	IAA	2.16008	up	Indole-3-acetic acid	C00954	ko00380,ko01100,ko04075	0.809613	4.68438e-05	3
Cluster-113524.2	3.04079	up	--	--	IAA	2.16008	up	Indole-3-acetic acid	C00954	ko00380,ko01100,ko04075	0.803873	5.82696e-05	3
Cluster-113597.7	8.78538	up	--	--	IAA	2.16008	up	Indole-3-acetic acid	C00954	ko00380,ko01100,ko04075	0.857914	5.29631e-06	3
Cluster-113602.0	3.09834	up	--	--	IAA	2.16008	up	Indole-3-acetic acid	C00954	ko00380,ko01100,ko04075	0.825008	2.51292e-05	3
Cluster-113602.1	2.94589	up	--	--	IAA	2.16008	up	Indole-3-acetic acid	C00954	ko00380,ko01100,ko04075	0.864728	3.65581e-06	3
Cluster-113602.4	2.42774	up	--	--	IAA	2.16008	up	Indole-3-acetic acid	C00954	ko00380,ko01100,ko04075	0.875419	1.95968e-06	3
Cluster-113602.6	2.4802	up	--	--	IAA	2.16008	up	Indole-3-acetic acid	C00954	ko00380,ko01100,ko04075	0.884497	1.10212e-06	3
Cluster-113602.7	2.7826	up	--	--	IAA	2.16008	up	Indole-3-acetic acid	C00954	ko00380,ko01100,ko04075	0.885934	1.00175e-06	3
Cluster-113647.2	7.76278	up	--	--	IAA	2.16008	up	Indole-3-acetic acid	C00954	ko00380,ko01100,ko04075	0.827186	2.29e-05	3
Cluster-113760.5	3.26313	up	K18819	ko00052,ko01100	IAA	2.16008	up	Indole-3-acetic acid	C00954	ko00380,ko01100,ko04075	0.822681	2.77128e-05	3
Cluster-113824.5	2.62887	up	--	--	IAA	2.16008	up	Indole-3-acetic acid	C00954	ko00380,ko01100,ko04075	0.803326	5.94726e-05	3
Cluster-113824.7	7.61626	up	--	--	IAA	2.16008	up	Indole-3-acetic acid	C00954	ko00380,ko01100,ko04075	0.801572	6.34729e-05	3
Cluster-113885.2	4.64584	up	K13416	ko04016,ko04075,ko04626	IAA	2.16008	up	Indole-3-acetic acid	C00954	ko00380,ko01100,ko04075	0.836153	1.54067e-05	3
Cluster-113885.3	6.82852	up	K13416	ko04016,ko04075,ko04626	IAA	2.16008	up	Indole-3-acetic acid	C00954	ko00380,ko01100,ko04075	0.886923	9.37372e-07	3
Cluster-113912.4	3.27688	up	--	--	IAA	2.16008	up	Indole-3-acetic acid	C00954	ko00380,ko01100,ko04075	0.886298	9.77601e-07	3
Cluster-11401.69	9.08261	up	--	--	IAA	2.16008	up	Indole-3-acetic acid	C00954	ko00380,ko01100,ko04075	0.800427	6.62045e-05	3
Cluster-11401.90	7.60393	up	--	--	IAA	2.16008	up	Indole-3-acetic acid	C00954	ko00380,ko01100,ko04075	0.828019	2.20929e-05	3
Cluster-114041.1	10.438	up	--	--	IAA	2.16008	up	Indole-3-acetic acid	C00954	ko00380,ko01100,ko04075	0.838464	1.38578e-05	3
Cluster-114050.0	4.13193	up	--	--	IAA	2.16008	up	Indole-3-acetic acid	C00954	ko00380,ko01100,ko04075	0.862488	4.13848e-06	3
Cluster-114050.2	2.27173	up	--	--	IAA	2.16008	up	Indole-3-acetic acid	C00954	ko00380,ko01100,ko04075	0.865129	3.57462e-06	3
Cluster-114050.3	1.90174	up	--	--	IAA	2.16008	up	Indole-3-acetic acid	C00954	ko00380,ko01100,ko04075	0.851794	7.27279e-06	3
Cluster-114077.0	9.04994	up	--	--	IAA	2.16008	up	Indole-3-acetic acid	C00954	ko00380,ko01100,ko04075	0.836702	1.50261e-05	3
Cluster-11408.13	9.71894	up	--	--	IAA	2.16008	up	Indole-3-acetic acid	C00954	ko00380,ko01100,ko04075	0.829369	2.08367e-05	3
Cluster-11408.24	5.20176	up	--	--	IAA	2.16008	up	Indole-3-acetic acid	C00954	ko00380,ko01100,ko04075	0.836681	1.50407e-05	3
Cluster-114083.5	4.22461	up	K00830	ko00250,ko00260,ko00630,ko01100,ko01110,ko01200,ko04146	IAA	2.16008	up	Indole-3-acetic acid	C00954	ko00380,ko01100,ko04075	0.863499	3.91413e-06	3
Cluster-114219.0	10.0608	up	--	--	IAA	2.16008	up	Indole-3-acetic acid	C00954	ko00380,ko01100,ko04075	0.890811	7.17538e-07	3
Cluster-114241.2	9.75271	up	--	--	IAA	2.16008	up	Indole-3-acetic acid	C00954	ko00380,ko01100,ko04075	0.894221	5.62891e-07	3
Cluster-114241.7	10.0864	up	--	--	IAA	2.16008	up	Indole-3-acetic acid	C00954	ko00380,ko01100,ko04075	0.906033	2.26819e-07	3
Cluster-114325.0	3.40564	up	K04565	ko04146	IAA	2.16008	up	Indole-3-acetic acid	C00954	ko00380,ko01100,ko04075	0.811304	4.38664e-05	3
Cluster-114325.2	8.35524	up	K04565	ko04146	IAA	2.16008	up	Indole-3-acetic acid	C00954	ko00380,ko01100,ko04075	0.867666	3.09655e-06	3
Cluster-114330.0	3.79288	up	--	--	IAA	2.16008	up	Indole-3-acetic acid	C00954	ko00380,ko01100,ko04075	0.868371	2.97393e-06	3
Cluster-114390.0	4.4563	up	--	--	IAA	2.16008	up	Indole-3-acetic acid	C00954	ko00380,ko01100,ko04075	0.900729	3.45927e-07	3
Cluster-114403.4	1.2708	up	K03122	ko03022	IAA	2.16008	up	Indole-3-acetic acid	C00954	ko00380,ko01100,ko04075	0.813037	4.09835e-05	3
Cluster-114408.2	10.7912	up	--	--	IAA	2.16008	up	Indole-3-acetic acid	C00954	ko00380,ko01100,ko04075	0.860329	4.65438e-06	3
Cluster-114460.2	5.25281	up	K03921	ko00061,ko01040,ko01100,ko01212	IAA	2.16008	up	Indole-3-acetic acid	C00954	ko00380,ko01100,ko04075	0.822149	2.83345e-05	3
Cluster-114563.2	6.92549	up	K13946	ko04075	IAA	2.16008	up	Indole-3-acetic acid	C00954	ko00380,ko01100,ko04075	0.87067	2.60257e-06	3
Cluster-114578.2	10.8201	up	--	--	IAA	2.16008	up	Indole-3-acetic acid	C00954	ko00380,ko01100,ko04075	0.890721	7.22081e-07	3
Cluster-114578.5	8.24233	up	--	--	IAA	2.16008	up	Indole-3-acetic acid	C00954	ko00380,ko01100,ko04075	0.814378	3.88659e-05	3
Cluster-114598.0	1.4313	up	--	--	IAA	2.16008	up	Indole-3-acetic acid	C00954	ko00380,ko01100,ko04075	0.88568	1.01888e-06	3
Cluster-114625.2	3.78234	up	--	--	IAA	2.16008	up	Indole-3-acetic acid	C00954	ko00380,ko01100,ko04075	0.802847	6.05421e-05	3
Cluster-114759.0	3.39382	up	--	--	IAA	2.16008	up	Indole-3-acetic acid	C00954	ko00380,ko01100,ko04075	0.83152	1.89619e-05	3
Cluster-114782.1	2.2015	up	K14506	ko04075	IAA	2.16008	up	Indole-3-acetic acid	C00954	ko00380,ko01100,ko04075	0.838316	1.39529e-05	3
Cluster-114789.3	2.33798	up	--	--	IAA	2.16008	up	Indole-3-acetic acid	C00954	ko00380,ko01100,ko04075	0.890083	7.54895e-07	3
Cluster-114891.4	9.64076	up	--	--	IAA	2.16008	up	Indole-3-acetic acid	C00954	ko00380,ko01100,ko04075	0.876542	1.82951e-06	3
Cluster-114909.0	2.94514	up	--	--	IAA	2.16008	up	Indole-3-acetic acid	C00954	ko00380,ko01100,ko04075	0.887973	8.72929e-07	3
Cluster-114909.1	1.62963	up	--	--	IAA	2.16008	up	Indole-3-acetic acid	C00954	ko00380,ko01100,ko04075	0.825182	2.49443e-05	3
Cluster-114912.0	4.23941	up	K00021	ko00900,ko01100,ko01110	IAA	2.16008	up	Indole-3-acetic acid	C00954	ko00380,ko01100,ko04075	0.874944	2.01709e-06	3
Cluster-114912.1	1.10933	up	K00021	ko00900,ko01100,ko01110	IAA	2.16008	up	Indole-3-acetic acid	C00954	ko00380,ko01100,ko04075	0.843149	1.11229e-05	3
Cluster-114917.5	9.46644	up	--	--	IAA	2.16008	up	Indole-3-acetic acid	C00954	ko00380,ko01100,ko04075	0.813679	3.99572e-05	3
Cluster-114925.1	1.66388	up	--	--	IAA	2.16008	up	Indole-3-acetic acid	C00954	ko00380,ko01100,ko04075	0.852353	7.06938e-06	3
Cluster-114949.1	7.53183	up	--	--	IAA	2.16008	up	Indole-3-acetic acid	C00954	ko00380,ko01100,ko04075	0.820372	3.04975e-05	3
Cluster-114949.2	4.94972	up	--	--	IAA	2.16008	up	Indole-3-acetic acid	C00954	ko00380,ko01100,ko04075	0.862559	4.12243e-06	3
Cluster-114949.3	3.35895	up	--	--	IAA	2.16008	up	Indole-3-acetic acid	C00954	ko00380,ko01100,ko04075	0.897453	4.43799e-07	3
Cluster-115002.1	8.41343	up	--	--	IAA	2.16008	up	Indole-3-acetic acid	C00954	ko00380,ko01100,ko04075	0.840002	1.29027e-05	3
Cluster-115049.1	2.82568	up	--	--	IAA	2.16008	up	Indole-3-acetic acid	C00954	ko00380,ko01100,ko04075	0.87587	1.90644e-06	3
Cluster-115049.2	10.5674	up	--	--	IAA	2.16008	up	Indole-3-acetic acid	C00954	ko00380,ko01100,ko04075	0.908767	1.80679e-07	3
Cluster-115065.6	9.34746	up	--	--	IAA	2.16008	up	Indole-3-acetic acid	C00954	ko00380,ko01100,ko04075	0.819293	3.18785e-05	3
Cluster-115115.0	5.44953	up	K01092	ko00562,ko01100,ko01110,ko04070	IAA	2.16008	up	Indole-3-acetic acid	C00954	ko00380,ko01100,ko04075	0.886474	9.66104e-07	3
Cluster-115217.4	13.5685	up	K00083	ko00940,ko01100,ko01110	IAA	2.16008	up	Indole-3-acetic acid	C00954	ko00380,ko01100,ko04075	0.893428	5.96028e-07	3
Cluster-115264.1	9.46805	up	--	--	IAA	2.16008	up	Indole-3-acetic acid	C00954	ko00380,ko01100,ko04075	0.852649	6.96339e-06	3
Cluster-115264.4	3.07079	up	--	--	IAA	2.16008	up	Indole-3-acetic acid	C00954	ko00380,ko01100,ko04075	0.895598	5.09157e-07	3
Cluster-115326.1	4.60534	up	--	--	IAA	2.16008	up	Indole-3-acetic acid	C00954	ko00380,ko01100,ko04075	0.906888	2.11411e-07	3
Cluster-115331.0	4.79122	up	--	--	IAA	2.16008	up	Indole-3-acetic acid	C00954	ko00380,ko01100,ko04075	0.832331	1.82932e-05	3
Cluster-115334.0	2.36658	up	--	--	IAA	2.16008	up	Indole-3-acetic acid	C00954	ko00380,ko01100,ko04075	0.854063	6.47676e-06	3
Cluster-115349.0	2.04421	up	--	--	IAA	2.16008	up	Indole-3-acetic acid	C00954	ko00380,ko01100,ko04075	0.84073	1.24706e-05	3
Cluster-115349.1	2.54326	up	--	--	IAA	2.16008	up	Indole-3-acetic acid	C00954	ko00380,ko01100,ko04075	0.85046	7.77884e-06	3
Cluster-115349.2	2.54259	up	--	--	IAA	2.16008	up	Indole-3-acetic acid	C00954	ko00380,ko01100,ko04075	0.800778	6.53579e-05	3
Cluster-115349.3	11.3866	up	--	--	IAA	2.16008	up	Indole-3-acetic acid	C00954	ko00380,ko01100,ko04075	0.800747	6.54313e-05	3
Cluster-115349.4	3.69594	up	--	--	IAA	2.16008	up	Indole-3-acetic acid	C00954	ko00380,ko01100,ko04075	0.882471	1.25818e-06	3
Cluster-115360.2	2.06096	up	K10728	ko03440	IAA	2.16008	up	Indole-3-acetic acid	C00954	ko00380,ko01100,ko04075	0.895357	5.1823e-07	3
Cluster-115370.1	7.22467	up	--	--	IAA	2.16008	up	Indole-3-acetic acid	C00954	ko00380,ko01100,ko04075	0.908956	1.77828e-07	3
Cluster-115370.5	2.67458	up	--	--	IAA	2.16008	up	Indole-3-acetic acid	C00954	ko00380,ko01100,ko04075	0.888491	8.42556e-07	3
Cluster-115370.8	5.60245	up	--	--	IAA	2.16008	up	Indole-3-acetic acid	C00954	ko00380,ko01100,ko04075	0.853274	6.74447e-06	3
Cluster-115391.0	11.4632	up	K02210	ko03030	IAA	2.16008	up	Indole-3-acetic acid	C00954	ko00380,ko01100,ko04075	0.89852	4.09582e-07	3
Cluster-115391.4	2.61983	up	K02210	ko03030	IAA	2.16008	up	Indole-3-acetic acid	C00954	ko00380,ko01100,ko04075	0.894218	5.63004e-07	3
Cluster-115392.0	8.20613	up	--	--	IAA	2.16008	up	Indole-3-acetic acid	C00954	ko00380,ko01100,ko04075	0.882555	1.25137e-06	3
Cluster-115471.2	2.48942	up	--	--	IAA	2.16008	up	Indole-3-acetic acid	C00954	ko00380,ko01100,ko04075	0.808313	4.92483e-05	3
Cluster-115479.5	1.58393	up	--	--	IAA	2.16008	up	Indole-3-acetic acid	C00954	ko00380,ko01100,ko04075	0.863435	3.92818e-06	3
Cluster-115664.6	9.58083	up	--	--	IAA	2.16008	up	Indole-3-acetic acid	C00954	ko00380,ko01100,ko04075	0.829172	2.10162e-05	3
Cluster-115664.7	5.7322	up	--	--	IAA	2.16008	up	Indole-3-acetic acid	C00954	ko00380,ko01100,ko04075	0.898068	4.23765e-07	3
Cluster-115670.1	5.4138	up	K13430	ko04626	IAA	2.16008	up	Indole-3-acetic acid	C00954	ko00380,ko01100,ko04075	0.827357	2.27318e-05	3
Cluster-115735.0	8.15296	up	--	--	IAA	2.16008	up	Indole-3-acetic acid	C00954	ko00380,ko01100,ko04075	0.807806	5.0215e-05	3
Cluster-115791.10	9.99914	up	K13448	ko04626	IAA	2.16008	up	Indole-3-acetic acid	C00954	ko00380,ko01100,ko04075	0.83636	1.52624e-05	3
Cluster-115809.1	2.17978	up	--	--	IAA	2.16008	up	Indole-3-acetic acid	C00954	ko00380,ko01100,ko04075	0.835587	1.58075e-05	3
Cluster-115811.0	2.63384	up	K00963	ko00040,ko00052,ko00500,ko00520,ko01100,ko01110,ko01240,ko01250	IAA	2.16008	up	Indole-3-acetic acid	C00954	ko00380,ko01100,ko04075	0.879512	1.52036e-06	3
Cluster-115865.1	9.45111	up	--	--	IAA	2.16008	up	Indole-3-acetic acid	C00954	ko00380,ko01100,ko04075	0.887871	8.79031e-07	3
Cluster-115865.3	4.16245	up	--	--	IAA	2.16008	up	Indole-3-acetic acid	C00954	ko00380,ko01100,ko04075	0.852239	7.11035e-06	3
Cluster-115963.0	7.35764	up	K00475	ko00941,ko01100,ko01110	IAA	2.16008	up	Indole-3-acetic acid	C00954	ko00380,ko01100,ko04075	0.841245	1.21727e-05	3
Cluster-115986.0	5.17131	up	--	--	IAA	2.16008	up	Indole-3-acetic acid	C00954	ko00380,ko01100,ko04075	0.889604	7.80403e-07	3
Cluster-116046.0	1.58658	up	K07375	ko04145	IAA	2.16008	up	Indole-3-acetic acid	C00954	ko00380,ko01100,ko04075	0.808886	4.81756e-05	3
Cluster-116131.4	7.77677	up	--	--	IAA	2.16008	up	Indole-3-acetic acid	C00954	ko00380,ko01100,ko04075	0.826165	2.39226e-05	3
Cluster-116173.6	2.14137	up	K01213	ko00040,ko01100	IAA	2.16008	up	Indole-3-acetic acid	C00954	ko00380,ko01100,ko04075	0.840519	1.25948e-05	3
Cluster-116185.6	7.92385	up	K01870	ko00970	IAA	2.16008	up	Indole-3-acetic acid	C00954	ko00380,ko01100,ko04075	0.80797	4.98997e-05	3
Cluster-116221.1	10.0755	up	--	--	IAA	2.16008	up	Indole-3-acetic acid	C00954	ko00380,ko01100,ko04075	0.864535	3.69537e-06	3
Cluster-116221.14	7.12048	up	--	--	IAA	2.16008	up	Indole-3-acetic acid	C00954	ko00380,ko01100,ko04075	0.857638	5.37411e-06	3
Cluster-116221.15	3.09788	up	--	--	IAA	2.16008	up	Indole-3-acetic acid	C00954	ko00380,ko01100,ko04075	0.847962	8.8077e-06	3
Cluster-116221.19	3.84591	up	--	--	IAA	2.16008	up	Indole-3-acetic acid	C00954	ko00380,ko01100,ko04075	0.846833	9.31004e-06	3
Cluster-116221.22	4.10903	up	--	--	IAA	2.16008	up	Indole-3-acetic acid	C00954	ko00380,ko01100,ko04075	0.805209	5.54179e-05	3
Cluster-116221.23	6.75261	up	--	--	IAA	2.16008	up	Indole-3-acetic acid	C00954	ko00380,ko01100,ko04075	0.871592	2.46517e-06	3
Cluster-116221.28	11.3532	up	--	--	IAA	2.16008	up	Indole-3-acetic acid	C00954	ko00380,ko01100,ko04075	0.868008	3.03658e-06	3
Cluster-116221.29	2.31177	up	--	--	IAA	2.16008	up	Indole-3-acetic acid	C00954	ko00380,ko01100,ko04075	0.809438	4.71614e-05	3
Cluster-116221.30	6.24825	up	--	--	IAA	2.16008	up	Indole-3-acetic acid	C00954	ko00380,ko01100,ko04075	0.815562	3.70735e-05	3
Cluster-116221.33	5.31758	up	--	--	IAA	2.16008	up	Indole-3-acetic acid	C00954	ko00380,ko01100,ko04075	0.874848	2.02887e-06	3
Cluster-116221.36	5.06164	up	--	--	IAA	2.16008	up	Indole-3-acetic acid	C00954	ko00380,ko01100,ko04075	0.892166	6.52206e-07	3
Cluster-116221.40	4.40431	up	--	--	IAA	2.16008	up	Indole-3-acetic acid	C00954	ko00380,ko01100,ko04075	0.863691	3.87293e-06	3
Cluster-116221.42	5.10278	up	--	--	IAA	2.16008	up	Indole-3-acetic acid	C00954	ko00380,ko01100,ko04075	0.906317	2.21591e-07	3
Cluster-116221.43	5.64115	up	--	--	IAA	2.16008	up	Indole-3-acetic acid	C00954	ko00380,ko01100,ko04075	0.875193	1.98683e-06	3
Cluster-116221.44	8.17664	up	--	--	IAA	2.16008	up	Indole-3-acetic acid	C00954	ko00380,ko01100,ko04075	0.868433	2.96338e-06	3
Cluster-116221.45	9.61853	up	--	--	IAA	2.16008	up	Indole-3-acetic acid	C00954	ko00380,ko01100,ko04075	0.897211	4.51866e-07	3
Cluster-116221.47	9.55714	up	--	--	IAA	2.16008	up	Indole-3-acetic acid	C00954	ko00380,ko01100,ko04075	0.874221	2.1073e-06	3
Cluster-116221.48	2.47129	up	--	--	IAA	2.16008	up	Indole-3-acetic acid	C00954	ko00380,ko01100,ko04075	0.834982	1.62466e-05	3
Cluster-116221.50	2.32818	up	--	--	IAA	2.16008	up	Indole-3-acetic acid	C00954	ko00380,ko01100,ko04075	0.806449	5.28786e-05	3
Cluster-116221.51	9.0228	up	--	--	IAA	2.16008	up	Indole-3-acetic acid	C00954	ko00380,ko01100,ko04075	0.813867	3.96609e-05	3
Cluster-116221.52	4.78811	up	--	--	IAA	2.16008	up	Indole-3-acetic acid	C00954	ko00380,ko01100,ko04075	0.874299	2.09741e-06	3
Cluster-116221.6	7.71808	up	--	--	IAA	2.16008	up	Indole-3-acetic acid	C00954	ko00380,ko01100,ko04075	0.890989	7.08635e-07	3
Cluster-116221.9	12.7896	up	--	--	IAA	2.16008	up	Indole-3-acetic acid	C00954	ko00380,ko01100,ko04075	0.906876	2.11621e-07	3
Cluster-11625.20	7.36411	up	--	--	IAA	2.16008	up	Indole-3-acetic acid	C00954	ko00380,ko01100,ko04075	0.818145	3.34064e-05	3
Cluster-116299.0	4.08356	up	--	--	IAA	2.16008	up	Indole-3-acetic acid	C00954	ko00380,ko01100,ko04075	0.848548	8.55667e-06	3
Cluster-116299.3	10.9219	up	--	--	IAA	2.16008	up	Indole-3-acetic acid	C00954	ko00380,ko01100,ko04075	0.874704	2.04672e-06	3
Cluster-116425.3	2.16779	up	K12272	ko03060	IAA	2.16008	up	Indole-3-acetic acid	C00954	ko00380,ko01100,ko04075	0.808471	4.89518e-05	3
Cluster-116490.1	12.1682	up	K13065	ko00940,ko00941,ko00945,ko01100,ko01110	IAA	2.16008	up	Indole-3-acetic acid	C00954	ko00380,ko01100,ko04075	0.897129	4.54641e-07	3
Cluster-116630.5	10.5343	up	--	--	IAA	2.16008	up	Indole-3-acetic acid	C00954	ko00380,ko01100,ko04075	0.846812	9.31973e-06	3
Cluster-116632.4	6.00363	up	K13066	ko00380,ko00940,ko01100,ko01110	IAA	2.16008	up	Indole-3-acetic acid	C00954	ko00380,ko01100,ko04075	0.883209	1.19927e-06	3
Cluster-116633.0	3.84823	up	--	--	IAA	2.16008	up	Indole-3-acetic acid	C00954	ko00380,ko01100,ko04075	0.806027	5.37318e-05	3
Cluster-116640.4	6.16769	up	--	--	IAA	2.16008	up	Indole-3-acetic acid	C00954	ko00380,ko01100,ko04075	0.860743	4.55151e-06	3
Cluster-116643.15	4.23426	up	--	--	IAA	2.16008	up	Indole-3-acetic acid	C00954	ko00380,ko01100,ko04075	0.874228	2.10645e-06	3
Cluster-116643.3	10.2343	up	--	--	IAA	2.16008	up	Indole-3-acetic acid	C00954	ko00380,ko01100,ko04075	0.874928	2.0191e-06	3
Cluster-116643.6	11.8196	up	--	--	IAA	2.16008	up	Indole-3-acetic acid	C00954	ko00380,ko01100,ko04075	0.879802	1.4927e-06	3
Cluster-116701.2	6.74422	up	--	--	IAA	2.16008	up	Indole-3-acetic acid	C00954	ko00380,ko01100,ko04075	0.862244	4.19421e-06	3
Cluster-116741.3	12.1041	up	--	--	IAA	2.16008	up	Indole-3-acetic acid	C00954	ko00380,ko01100,ko04075	0.875083	2.00022e-06	3
Cluster-116774.3	3.31306	up	--	--	IAA	2.16008	up	Indole-3-acetic acid	C00954	ko00380,ko01100,ko04075	0.846112	9.64327e-06	3
Cluster-116789.2	3.27581	up	K11091	ko03040	IAA	2.16008	up	Indole-3-acetic acid	C00954	ko00380,ko01100,ko04075	0.849384	8.20861e-06	3
Cluster-116850.5	8.03238	up	--	--	IAA	2.16008	up	Indole-3-acetic acid	C00954	ko00380,ko01100,ko04075	0.813765	3.98215e-05	3
Cluster-116910.0	4.20861	up	--	--	IAA	2.16008	up	Indole-3-acetic acid	C00954	ko00380,ko01100,ko04075	0.853909	6.52815e-06	3
Cluster-117042.1	4.73716	up	--	--	IAA	2.16008	up	Indole-3-acetic acid	C00954	ko00380,ko01100,ko04075	0.811376	4.37429e-05	3
Cluster-117062.0	7.8569	up	--	--	IAA	2.16008	up	Indole-3-acetic acid	C00954	ko00380,ko01100,ko04075	0.815331	3.7417e-05	3
Cluster-117143.0	2.39959	up	--	--	IAA	2.16008	up	Indole-3-acetic acid	C00954	ko00380,ko01100,ko04075	0.82004	3.0917e-05	3
Cluster-117226.2	2.06543	up	--	--	IAA	2.16008	up	Indole-3-acetic acid	C00954	ko00380,ko01100,ko04075	0.842866	1.12735e-05	3
Cluster-117227.5	4.54976	up	--	--	IAA	2.16008	up	Indole-3-acetic acid	C00954	ko00380,ko01100,ko04075	0.902691	2.9675e-07	3
Cluster-117246.0	4.12899	up	K03363	ko04120	IAA	2.16008	up	Indole-3-acetic acid	C00954	ko00380,ko01100,ko04075	0.835655	1.5759e-05	3
Cluster-117272.1	7.99199	up	--	--	IAA	2.16008	up	Indole-3-acetic acid	C00954	ko00380,ko01100,ko04075	0.859631	4.8326e-06	3
Cluster-117273.0	2.59564	up	--	--	IAA	2.16008	up	Indole-3-acetic acid	C00954	ko00380,ko01100,ko04075	0.897824	4.31607e-07	3
Cluster-117295.1	12.6049	up	K01246	ko03410	IAA	2.16008	up	Indole-3-acetic acid	C00954	ko00380,ko01100,ko04075	0.893553	5.90698e-07	3
Cluster-117332.0	2.63159	up	--	--	IAA	2.16008	up	Indole-3-acetic acid	C00954	ko00380,ko01100,ko04075	0.836585	1.51063e-05	3
Cluster-11740.132	6.57017	up	--	--	IAA	2.16008	up	Indole-3-acetic acid	C00954	ko00380,ko01100,ko04075	0.8169	3.51329e-05	3
Cluster-117410.0	8.75032	up	--	--	IAA	2.16008	up	Indole-3-acetic acid	C00954	ko00380,ko01100,ko04075	0.888132	8.63498e-07	3
Cluster-117410.3	4.82777	up	--	--	IAA	2.16008	up	Indole-3-acetic acid	C00954	ko00380,ko01100,ko04075	0.835072	1.61807e-05	3
Cluster-117656.0	2.47228	up	--	--	IAA	2.16008	up	Indole-3-acetic acid	C00954	ko00380,ko01100,ko04075	0.824621	2.55441e-05	3
Cluster-117659.5	3.61117	up	--	--	IAA	2.16008	up	Indole-3-acetic acid	C00954	ko00380,ko01100,ko04075	0.825709	2.43916e-05	3
Cluster-117675.1	8.79657	up	--	--	IAA	2.16008	up	Indole-3-acetic acid	C00954	ko00380,ko01100,ko04075	0.832589	1.80848e-05	3
Cluster-117690.11	2.06493	up	--	--	IAA	2.16008	up	Indole-3-acetic acid	C00954	ko00380,ko01100,ko04075	0.812771	4.14163e-05	3
Cluster-117690.3	2.58705	up	--	--	IAA	2.16008	up	Indole-3-acetic acid	C00954	ko00380,ko01100,ko04075	0.877913	1.6806e-06	3
Cluster-117690.8	2.77328	up	--	--	IAA	2.16008	up	Indole-3-acetic acid	C00954	ko00380,ko01100,ko04075	0.888218	8.58442e-07	3
Cluster-117701.1	1.81993	up	--	--	IAA	2.16008	up	Indole-3-acetic acid	C00954	ko00380,ko01100,ko04075	0.926564	3.37178e-08	3
Cluster-117793.5	6.76315	up	K13459	ko04626	IAA	2.16008	up	Indole-3-acetic acid	C00954	ko00380,ko01100,ko04075	0.813499	4.02432e-05	3
Cluster-117793.7	10.388	up	K13459	ko04626	IAA	2.16008	up	Indole-3-acetic acid	C00954	ko00380,ko01100,ko04075	0.879073	1.563e-06	3
Cluster-117884.1	1.92145	up	--	--	IAA	2.16008	up	Indole-3-acetic acid	C00954	ko00380,ko01100,ko04075	0.915637	9.87529e-08	3
Cluster-117930.7	4.04697	up	--	--	IAA	2.16008	up	Indole-3-acetic acid	C00954	ko00380,ko01100,ko04075	0.853302	6.73495e-06	3
Cluster-117931.0	9.16486	up	--	--	IAA	2.16008	up	Indole-3-acetic acid	C00954	ko00380,ko01100,ko04075	0.862126	4.22138e-06	3
Cluster-117971.1	11.1103	up	K00485	ko00430,ko01100	IAA	2.16008	up	Indole-3-acetic acid	C00954	ko00380,ko01100,ko04075	0.903151	2.86134e-07	3
Cluster-118013.0	1.43325	up	--	--	IAA	2.16008	up	Indole-3-acetic acid	C00954	ko00380,ko01100,ko04075	0.873503	2.2003e-06	3
Cluster-118038.1	9.084	up	--	--	IAA	2.16008	up	Indole-3-acetic acid	C00954	ko00380,ko01100,ko04075	0.826965	2.3118e-05	3
Cluster-118038.9	10.2776	up	--	--	IAA	2.16008	up	Indole-3-acetic acid	C00954	ko00380,ko01100,ko04075	0.851235	7.48102e-06	3
Cluster-118102.0	5.93851	up	K20558	ko04016	IAA	2.16008	up	Indole-3-acetic acid	C00954	ko00380,ko01100,ko04075	0.885015	1.06498e-06	3
Cluster-118102.3	10.0957	up	K20558	ko04016	IAA	2.16008	up	Indole-3-acetic acid	C00954	ko00380,ko01100,ko04075	0.871553	2.47093e-06	3
Cluster-118105.0	3.11378	up	--	--	IAA	2.16008	up	Indole-3-acetic acid	C00954	ko00380,ko01100,ko04075	0.900657	3.47866e-07	3
Cluster-118118.1	11.0466	up	--	--	IAA	2.16008	up	Indole-3-acetic acid	C00954	ko00380,ko01100,ko04075	0.824695	2.54643e-05	3
Cluster-118152.0	2.39804	up	K10683	ko03440	IAA	2.16008	up	Indole-3-acetic acid	C00954	ko00380,ko01100,ko04075	0.886032	9.95175e-07	3
Cluster-118152.1	2.98916	up	K10683	ko03440	IAA	2.16008	up	Indole-3-acetic acid	C00954	ko00380,ko01100,ko04075	0.843033	1.11845e-05	3
Cluster-118171.4	4.81761	up	--	--	IAA	2.16008	up	Indole-3-acetic acid	C00954	ko00380,ko01100,ko04075	0.869604	2.76943e-06	3
Cluster-118216.1	2.47288	up	--	--	IAA	2.16008	up	Indole-3-acetic acid	C00954	ko00380,ko01100,ko04075	0.880383	1.43875e-06	3
Cluster-118233.1	14.6361	up	K04079	ko04141,ko04626	IAA	2.16008	up	Indole-3-acetic acid	C00954	ko00380,ko01100,ko04075	0.827833	2.22703e-05	3
Cluster-118331.2	12.058	up	K12848	ko03040	IAA	2.16008	up	Indole-3-acetic acid	C00954	ko00380,ko01100,ko04075	0.857695	5.35817e-06	3
Cluster-11841.1	2.56514	up	K01937	ko00240,ko01100,ko01232,ko01240	IAA	2.16008	up	Indole-3-acetic acid	C00954	ko00380,ko01100,ko04075	0.85335	6.71819e-06	3
Cluster-118428.4	10.7355	up	--	--	IAA	2.16008	up	Indole-3-acetic acid	C00954	ko00380,ko01100,ko04075	0.833606	1.72827e-05	3
Cluster-118428.9	1.74634	up	--	--	IAA	2.16008	up	Indole-3-acetic acid	C00954	ko00380,ko01100,ko04075	0.803209	5.97314e-05	3
Cluster-118499.1	8.74782	up	--	--	IAA	2.16008	up	Indole-3-acetic acid	C00954	ko00380,ko01100,ko04075	0.862402	4.1581e-06	3
Cluster-118499.12	14.3949	up	--	--	IAA	2.16008	up	Indole-3-acetic acid	C00954	ko00380,ko01100,ko04075	0.863691	3.87274e-06	3
Cluster-118499.2	13.2076	up	--	--	IAA	2.16008	up	Indole-3-acetic acid	C00954	ko00380,ko01100,ko04075	0.883863	1.14901e-06	3
Cluster-118499.24	5.96449	up	--	--	IAA	2.16008	up	Indole-3-acetic acid	C00954	ko00380,ko01100,ko04075	0.842116	1.16822e-05	3
Cluster-118499.25	1.23835	up	--	--	IAA	2.16008	up	Indole-3-acetic acid	C00954	ko00380,ko01100,ko04075	0.848057	8.76691e-06	3
Cluster-118499.3	1.98518	up	--	--	IAA	2.16008	up	Indole-3-acetic acid	C00954	ko00380,ko01100,ko04075	0.8206	3.02132e-05	3
Cluster-118501.1	5.61241	up	--	--	IAA	2.16008	up	Indole-3-acetic acid	C00954	ko00380,ko01100,ko04075	0.808536	4.88289e-05	3
Cluster-118523.1	4.3032	up	--	--	IAA	2.16008	up	Indole-3-acetic acid	C00954	ko00380,ko01100,ko04075	0.857893	5.30206e-06	3
Cluster-118575.0	1.87212	up	--	--	IAA	2.16008	up	Indole-3-acetic acid	C00954	ko00380,ko01100,ko04075	0.837616	1.441e-05	3
Cluster-118712.6	9.55663	up	K10871	ko03440	IAA	2.16008	up	Indole-3-acetic acid	C00954	ko00380,ko01100,ko04075	0.859303	4.91856e-06	3
Cluster-118716.0	8.02295	up	--	--	IAA	2.16008	up	Indole-3-acetic acid	C00954	ko00380,ko01100,ko04075	0.879671	1.50516e-06	3
Cluster-118750.1	6.83089	up	--	--	IAA	2.16008	up	Indole-3-acetic acid	C00954	ko00380,ko01100,ko04075	0.882034	1.29432e-06	3
Cluster-118763.0	1.57231	up	--	--	IAA	2.16008	up	Indole-3-acetic acid	C00954	ko00380,ko01100,ko04075	0.879688	1.50355e-06	3
Cluster-118818.0	3.58588	up	K09839	ko00906,ko01100,ko01110	IAA	2.16008	up	Indole-3-acetic acid	C00954	ko00380,ko01100,ko04075	0.853797	6.56592e-06	3
Cluster-118819.1	9.81436	up	K12811	ko03040	IAA	2.16008	up	Indole-3-acetic acid	C00954	ko00380,ko01100,ko04075	0.863048	4.01296e-06	3
Cluster-118819.2	4.95718	up	--	--	IAA	2.16008	up	Indole-3-acetic acid	C00954	ko00380,ko01100,ko04075	0.852107	7.15818e-06	3
Cluster-118828.2	9.78019	up	--	--	IAA	2.16008	up	Indole-3-acetic acid	C00954	ko00380,ko01100,ko04075	0.807754	5.03149e-05	3
Cluster-118969.1	2.68838	up	K02716	ko00195,ko01100	IAA	2.16008	up	Indole-3-acetic acid	C00954	ko00380,ko01100,ko04075	0.83403	1.69575e-05	3
Cluster-119001.1	10.3634	up	--	--	IAA	2.16008	up	Indole-3-acetic acid	C00954	ko00380,ko01100,ko04075	0.822299	2.81583e-05	3
Cluster-119072.17	6.99076	up	--	--	IAA	2.16008	up	Indole-3-acetic acid	C00954	ko00380,ko01100,ko04075	0.809691	4.6704e-05	3
Cluster-119074.2	1.58153	up	K17872	ko00130,ko01100,ko01110,ko01240	IAA	2.16008	up	Indole-3-acetic acid	C00954	ko00380,ko01100,ko04075	0.807417	5.09658e-05	3
Cluster-119146.2	6.85094	up	--	--	IAA	2.16008	up	Indole-3-acetic acid	C00954	ko00380,ko01100,ko04075	0.863112	3.99881e-06	3
Cluster-119146.5	4.14272	insig	--	--	IAA	2.16008	up	Indole-3-acetic acid	C00954	ko00380,ko01100,ko04075	0.815724	3.68337e-05	3
Cluster-119151.8	8.14168	up	--	--	IAA	2.16008	up	Indole-3-acetic acid	C00954	ko00380,ko01100,ko04075	0.84198	1.17578e-05	3
Cluster-119221.1	4.34285	up	K02721	ko00195,ko01100	IAA	2.16008	up	Indole-3-acetic acid	C00954	ko00380,ko01100,ko04075	0.846719	9.36193e-06	3
Cluster-119239.3	3.41719	up	--	--	IAA	2.16008	up	Indole-3-acetic acid	C00954	ko00380,ko01100,ko04075	0.880545	1.42396e-06	3
Cluster-119243.2	2.45849	insig	K16224	ko04016,ko04626	IAA	2.16008	up	Indole-3-acetic acid	C00954	ko00380,ko01100,ko04075	0.806506	5.27645e-05	3
Cluster-119247.3	2.81308	up	--	--	IAA	2.16008	up	Indole-3-acetic acid	C00954	ko00380,ko01100,ko04075	0.871911	2.41916e-06	3
Cluster-119247.6	10.1931	up	--	--	IAA	2.16008	up	Indole-3-acetic acid	C00954	ko00380,ko01100,ko04075	0.80078	6.5353e-05	3
Cluster-119260.3	6.08248	up	--	--	IAA	2.16008	up	Indole-3-acetic acid	C00954	ko00380,ko01100,ko04075	0.911891	1.38119e-07	3
Cluster-119260.6	4.19206	up	--	--	IAA	2.16008	up	Indole-3-acetic acid	C00954	ko00380,ko01100,ko04075	0.900047	3.64589e-07	3
Cluster-119260.9	2.24533	up	--	--	IAA	2.16008	up	Indole-3-acetic acid	C00954	ko00380,ko01100,ko04075	0.865921	3.419e-06	3
Cluster-119280.1	2.53145	up	K01126	ko00564	IAA	2.16008	up	Indole-3-acetic acid	C00954	ko00380,ko01100,ko04075	0.801184	6.43866e-05	3
Cluster-119322.0	2.83707	up	--	--	IAA	2.16008	up	Indole-3-acetic acid	C00954	ko00380,ko01100,ko04075	0.82456	2.56094e-05	3
Cluster-11939.30	8.48699	up	--	--	IAA	2.16008	up	Indole-3-acetic acid	C00954	ko00380,ko01100,ko04075	0.885349	1.04161e-06	3
Cluster-11939.37	7.85946	up	--	--	IAA	2.16008	up	Indole-3-acetic acid	C00954	ko00380,ko01100,ko04075	0.80394	5.81238e-05	3
Cluster-11939.39	8.9113	up	--	--	IAA	2.16008	up	Indole-3-acetic acid	C00954	ko00380,ko01100,ko04075	0.801549	6.35254e-05	3
Cluster-119429.0	1.74804	up	--	--	IAA	2.16008	up	Indole-3-acetic acid	C00954	ko00380,ko01100,ko04075	0.825907	2.41872e-05	3
Cluster-11948.6	5.87263	up	--	--	IAA	2.16008	up	Indole-3-acetic acid	C00954	ko00380,ko01100,ko04075	0.819004	3.22578e-05	3
Cluster-119482.1	4.23556	up	K15362	ko03440	IAA	2.16008	up	Indole-3-acetic acid	C00954	ko00380,ko01100,ko04075	0.874763	2.03938e-06	3
Cluster-119498.0	1.20149	up	--	--	IAA	2.16008	up	Indole-3-acetic acid	C00954	ko00380,ko01100,ko04075	0.803667	5.8719e-05	3
Cluster-119517.9	8.58395	up	K00850	ko00010,ko00030,ko00051,ko00052,ko01100,ko01110,ko01200,ko01230,ko03018	IAA	2.16008	up	Indole-3-acetic acid	C00954	ko00380,ko01100,ko04075	0.807586	5.06394e-05	3
Cluster-119535.0	11.976	up	K03860	ko00563,ko01100	IAA	2.16008	up	Indole-3-acetic acid	C00954	ko00380,ko01100,ko04075	0.849319	8.23521e-06	3
Cluster-119538.8	3.05142	up	--	--	IAA	2.16008	up	Indole-3-acetic acid	C00954	ko00380,ko01100,ko04075	0.847105	9.1867e-06	3
Cluster-119548.0	11.6422	up	K00975	ko00500,ko00520,ko01100,ko01110,ko01250	IAA	2.16008	up	Indole-3-acetic acid	C00954	ko00380,ko01100,ko04075	0.874461	2.077e-06	3
Cluster-119548.4	10.9568	up	K00975	ko00500,ko00520,ko01100,ko01110,ko01250	IAA	2.16008	up	Indole-3-acetic acid	C00954	ko00380,ko01100,ko04075	0.848877	8.41826e-06	3
Cluster-119583.0	5.46474	up	--	--	IAA	2.16008	up	Indole-3-acetic acid	C00954	ko00380,ko01100,ko04075	0.813322	4.05265e-05	3
Cluster-119617.0	5.60012	up	--	--	IAA	2.16008	up	Indole-3-acetic acid	C00954	ko00380,ko01100,ko04075	0.880711	1.40898e-06	3
Cluster-119649.5	8.03252	up	--	--	IAA	2.16008	up	Indole-3-acetic acid	C00954	ko00380,ko01100,ko04075	0.836552	1.5129e-05	3
Cluster-119753.1	10.5661	up	--	--	IAA	2.16008	up	Indole-3-acetic acid	C00954	ko00380,ko01100,ko04075	0.81057	4.51391e-05	3
Cluster-119756.12	3.21345	up	K14411	ko03015	IAA	2.16008	up	Indole-3-acetic acid	C00954	ko00380,ko01100,ko04075	0.839173	1.34105e-05	3
Cluster-119756.21	14.4666	up	--	--	IAA	2.16008	up	Indole-3-acetic acid	C00954	ko00380,ko01100,ko04075	0.884417	1.1079e-06	3
Cluster-119756.27	5.23146	up	--	--	IAA	2.16008	up	Indole-3-acetic acid	C00954	ko00380,ko01100,ko04075	0.874161	2.11497e-06	3
Cluster-119756.6	10.0488	up	--	--	IAA	2.16008	up	Indole-3-acetic acid	C00954	ko00380,ko01100,ko04075	0.856946	5.57399e-06	3
Cluster-119825.0	2.3727	up	--	--	IAA	2.16008	up	Indole-3-acetic acid	C00954	ko00380,ko01100,ko04075	0.800282	6.6558e-05	3
Cluster-119954.0	8.81699	up	--	--	IAA	2.16008	up	Indole-3-acetic acid	C00954	ko00380,ko01100,ko04075	0.821992	2.85198e-05	3
Cluster-119962.5	7.45613	up	--	--	IAA	2.16008	up	Indole-3-acetic acid	C00954	ko00380,ko01100,ko04075	0.814891	3.80795e-05	3
Cluster-119965.2	12.7567	up	--	--	IAA	2.16008	up	Indole-3-acetic acid	C00954	ko00380,ko01100,ko04075	0.884746	1.08411e-06	3
Cluster-119978.3	9.53199	up	K01738	ko00270,ko00920,ko01100,ko01110,ko01200,ko01230	IAA	2.16008	up	Indole-3-acetic acid	C00954	ko00380,ko01100,ko04075	0.814398	3.88347e-05	3
Cluster-119998.5	11.7632	up	--	--	IAA	2.16008	up	Indole-3-acetic acid	C00954	ko00380,ko01100,ko04075	0.803324	5.94761e-05	3
Cluster-120027.14	10.0394	up	--	--	IAA	2.16008	up	Indole-3-acetic acid	C00954	ko00380,ko01100,ko04075	0.844189	1.05827e-05	3
Cluster-120031.0	2.2647	up	--	--	IAA	2.16008	up	Indole-3-acetic acid	C00954	ko00380,ko01100,ko04075	0.878187	1.6522e-06	3
Cluster-120054.0	5.67725	up	--	--	IAA	2.16008	up	Indole-3-acetic acid	C00954	ko00380,ko01100,ko04075	0.888935	8.17279e-07	3
Cluster-120087.8	5.30286	up	K10875	ko03440	IAA	2.16008	up	Indole-3-acetic acid	C00954	ko00380,ko01100,ko04075	0.832208	1.83935e-05	3
Cluster-120125.1	10.0151	up	K01689	ko00010,ko01100,ko01110,ko01200,ko01230,ko03018	IAA	2.16008	up	Indole-3-acetic acid	C00954	ko00380,ko01100,ko04075	0.857438	5.43134e-06	3
Cluster-120128.0	2.43419	up	--	--	IAA	2.16008	up	Indole-3-acetic acid	C00954	ko00380,ko01100,ko04075	0.826734	2.33476e-05	3
Cluster-120130.0	3.27177	up	--	--	IAA	2.16008	up	Indole-3-acetic acid	C00954	ko00380,ko01100,ko04075	0.810652	4.49958e-05	3
Cluster-120130.8	8.33006	up	--	--	IAA	2.16008	up	Indole-3-acetic acid	C00954	ko00380,ko01100,ko04075	0.860089	4.715e-06	3
Cluster-120138.0	9.08362	up	K13435	ko04626	IAA	2.16008	up	Indole-3-acetic acid	C00954	ko00380,ko01100,ko04075	0.824421	2.57605e-05	3
Cluster-120138.4	11.9685	up	K13435	ko04626	IAA	2.16008	up	Indole-3-acetic acid	C00954	ko00380,ko01100,ko04075	0.816569	3.5605e-05	3
Cluster-120148.0	9.27549	up	K13426	ko04016,ko04626	IAA	2.16008	up	Indole-3-acetic acid	C00954	ko00380,ko01100,ko04075	0.863967	3.8141e-06	3
Cluster-120156.0	7.91164	up	--	--	IAA	2.16008	up	Indole-3-acetic acid	C00954	ko00380,ko01100,ko04075	0.841723	1.19015e-05	3
Cluster-120162.229	10.7899	up	--	--	IAA	2.16008	up	Indole-3-acetic acid	C00954	ko00380,ko01100,ko04075	0.872271	2.36812e-06	3
Cluster-120196.2	3.40546	up	K13993	ko04141	IAA	2.16008	up	Indole-3-acetic acid	C00954	ko00380,ko01100,ko04075	0.806316	5.31473e-05	3
Cluster-120196.5	7.07105	up	K13993	ko04141	IAA	2.16008	up	Indole-3-acetic acid	C00954	ko00380,ko01100,ko04075	0.898578	4.078e-07	3
Cluster-120196.6	4.13663	up	K20781	ko00514	IAA	2.16008	up	Indole-3-acetic acid	C00954	ko00380,ko01100,ko04075	0.846744	9.35064e-06	3
Cluster-120215.0	8.37863	up	--	--	IAA	2.16008	up	Indole-3-acetic acid	C00954	ko00380,ko01100,ko04075	0.894742	5.41996e-07	3
Cluster-120260.4	9.86188	up	K13412	ko04626	IAA	2.16008	up	Indole-3-acetic acid	C00954	ko00380,ko01100,ko04075	0.844281	1.05361e-05	3
Cluster-120278.2	1.38022	up	--	--	IAA	2.16008	up	Indole-3-acetic acid	C00954	ko00380,ko01100,ko04075	0.832611	1.80669e-05	3
Cluster-120278.3	8.46528	up	--	--	IAA	2.16008	up	Indole-3-acetic acid	C00954	ko00380,ko01100,ko04075	0.81257	4.17443e-05	3
Cluster-120280.3	2.71241	up	--	--	IAA	2.16008	up	Indole-3-acetic acid	C00954	ko00380,ko01100,ko04075	0.808375	4.91315e-05	3
Cluster-120337.0	4.10785	up	--	--	IAA	2.16008	up	Indole-3-acetic acid	C00954	ko00380,ko01100,ko04075	0.90142	3.27874e-07	3
Cluster-120440.0	12.3126	up	--	--	IAA	2.16008	up	Indole-3-acetic acid	C00954	ko00380,ko01100,ko04075	0.825316	2.48028e-05	3
Cluster-120440.5	2.24537	up	--	--	IAA	2.16008	up	Indole-3-acetic acid	C00954	ko00380,ko01100,ko04075	0.920867	6.01876e-08	3
Cluster-120478.2	11.8439	up	K02358	ko04626	IAA	2.16008	up	Indole-3-acetic acid	C00954	ko00380,ko01100,ko04075	0.842854	1.12804e-05	3
Cluster-120492.6	7.90248	up	--	--	IAA	2.16008	up	Indole-3-acetic acid	C00954	ko00380,ko01100,ko04075	0.838579	1.37845e-05	3
Cluster-120504.3	11.1861	up	--	--	IAA	2.16008	up	Indole-3-acetic acid	C00954	ko00380,ko01100,ko04075	0.880639	1.41543e-06	3
Cluster-120504.4	9.73999	up	--	--	IAA	2.16008	up	Indole-3-acetic acid	C00954	ko00380,ko01100,ko04075	0.873932	2.14438e-06	3
Cluster-120511.0	9.30789	up	--	--	IAA	2.16008	up	Indole-3-acetic acid	C00954	ko00380,ko01100,ko04075	0.888443	8.45319e-07	3
Cluster-120511.1	2.14615	up	--	--	IAA	2.16008	up	Indole-3-acetic acid	C00954	ko00380,ko01100,ko04075	0.815551	3.7089e-05	3
Cluster-120521.3	5.5533	up	--	--	IAA	2.16008	up	Indole-3-acetic acid	C00954	ko00380,ko01100,ko04075	0.84073	1.24708e-05	3
Cluster-120540.1	11.4174	up	K04712	ko00600,ko01100	IAA	2.16008	up	Indole-3-acetic acid	C00954	ko00380,ko01100,ko04075	0.822788	2.75892e-05	3
Cluster-120600.1	9.34666	up	--	--	IAA	2.16008	up	Indole-3-acetic acid	C00954	ko00380,ko01100,ko04075	0.831397	1.90646e-05	3
Cluster-120605.1	9.90415	up	--	--	IAA	2.16008	up	Indole-3-acetic acid	C00954	ko00380,ko01100,ko04075	0.833258	1.7554e-05	3
Cluster-120633.6	9.43324	up	--	--	IAA	2.16008	up	Indole-3-acetic acid	C00954	ko00380,ko01100,ko04075	0.826809	2.32728e-05	3
Cluster-120674.7	2.2381	up	--	--	IAA	2.16008	up	Indole-3-acetic acid	C00954	ko00380,ko01100,ko04075	0.874551	2.06577e-06	3
Cluster-120691.0	3.30772	up	--	--	IAA	2.16008	up	Indole-3-acetic acid	C00954	ko00380,ko01100,ko04075	0.859001	4.99843e-06	3
Cluster-120693.0	1.84281	up	--	--	IAA	2.16008	up	Indole-3-acetic acid	C00954	ko00380,ko01100,ko04075	0.855943	5.87491e-06	3
Cluster-120716.0	8.60394	up	K00430	ko00940,ko01100,ko01110	IAA	2.16008	up	Indole-3-acetic acid	C00954	ko00380,ko01100,ko04075	0.871883	2.42322e-06	3
Cluster-120728.0	3.45186	up	--	--	IAA	2.16008	up	Indole-3-acetic acid	C00954	ko00380,ko01100,ko04075	0.869968	2.71142e-06	3
Cluster-120782.0	2.61081	up	--	--	IAA	2.16008	up	Indole-3-acetic acid	C00954	ko00380,ko01100,ko04075	0.877727	1.70019e-06	3
Cluster-120851.7	7.92469	up	--	--	IAA	2.16008	up	Indole-3-acetic acid	C00954	ko00380,ko01100,ko04075	0.837183	1.46993e-05	3
Cluster-120856.1	3.8979	up	--	--	IAA	2.16008	up	Indole-3-acetic acid	C00954	ko00380,ko01100,ko04075	0.848711	8.48791e-06	3
Cluster-120856.3	10.2892	up	--	--	IAA	2.16008	up	Indole-3-acetic acid	C00954	ko00380,ko01100,ko04075	0.826553	2.35298e-05	3
Cluster-120927.7	4.68559	up	K02324	ko03030,ko03410,ko03420	IAA	2.16008	up	Indole-3-acetic acid	C00954	ko00380,ko01100,ko04075	0.900368	3.55711e-07	3
Cluster-120976.2	4.74837	up	--	--	IAA	2.16008	up	Indole-3-acetic acid	C00954	ko00380,ko01100,ko04075	0.866946	3.2263e-06	3
Cluster-120995.0	2.42428	up	--	--	IAA	2.16008	up	Indole-3-acetic acid	C00954	ko00380,ko01100,ko04075	0.857441	5.43048e-06	3
Cluster-12100.5	2.31599	up	--	--	IAA	2.16008	up	Indole-3-acetic acid	C00954	ko00380,ko01100,ko04075	0.816033	3.63809e-05	3
Cluster-121067.4	4.51716	up	--	--	IAA	2.16008	up	Indole-3-acetic acid	C00954	ko00380,ko01100,ko04075	0.802379	6.1605e-05	3
Cluster-121231.1	9.83021	up	K01759	ko00620,ko01100	IAA	2.16008	up	Indole-3-acetic acid	C00954	ko00380,ko01100,ko04075	0.85885	5.03894e-06	3
Cluster-121269.0	13.1408	up	--	--	IAA	2.16008	up	Indole-3-acetic acid	C00954	ko00380,ko01100,ko04075	0.883164	1.20281e-06	3
Cluster-121269.5	3.05102	up	K13466	ko04626	IAA	2.16008	up	Indole-3-acetic acid	C00954	ko00380,ko01100,ko04075	0.85215	7.14246e-06	3
Cluster-121269.7	6.61799	up	--	--	IAA	2.16008	up	Indole-3-acetic acid	C00954	ko00380,ko01100,ko04075	0.900435	3.53874e-07	3
Cluster-121355.5	1.80862	up	--	--	IAA	2.16008	up	Indole-3-acetic acid	C00954	ko00380,ko01100,ko04075	0.892064	6.56908e-07	3
Cluster-121371.6	5.86163	up	K12833	ko03040	IAA	2.16008	up	Indole-3-acetic acid	C00954	ko00380,ko01100,ko04075	0.856772	5.62537e-06	3
Cluster-121374.0	2.62573	up	--	--	IAA	2.16008	up	Indole-3-acetic acid	C00954	ko00380,ko01100,ko04075	0.815837	3.66679e-05	3
Cluster-121374.1	4.30429	up	--	--	IAA	2.16008	up	Indole-3-acetic acid	C00954	ko00380,ko01100,ko04075	0.88382	1.15226e-06	3
Cluster-121394.0	9.8978	up	K12191	ko04144	IAA	2.16008	up	Indole-3-acetic acid	C00954	ko00380,ko01100,ko04075	0.856813	5.61321e-06	3
Cluster-121440.1	3.01129	up	--	--	IAA	2.16008	up	Indole-3-acetic acid	C00954	ko00380,ko01100,ko04075	0.835828	1.56362e-05	3
Cluster-121461.1	3.31128	up	K14494	ko04075	IAA	2.16008	up	Indole-3-acetic acid	C00954	ko00380,ko01100,ko04075	0.863219	3.9752e-06	3
Cluster-121461.3	1.26652	up	K14494	ko04075	IAA	2.16008	up	Indole-3-acetic acid	C00954	ko00380,ko01100,ko04075	0.835683	1.57388e-05	3
Cluster-121461.5	1.96837	up	K14494	ko04075	IAA	2.16008	up	Indole-3-acetic acid	C00954	ko00380,ko01100,ko04075	0.82592	2.41737e-05	3
Cluster-121472.5	1.01867	up	--	--	IAA	2.16008	up	Indole-3-acetic acid	C00954	ko00380,ko01100,ko04075	0.84824	8.688e-06	3
Cluster-121482.0	3.03953	up	--	--	IAA	2.16008	up	Indole-3-acetic acid	C00954	ko00380,ko01100,ko04075	0.897501	4.42203e-07	3
Cluster-121533.1	1.31156	up	--	--	IAA	2.16008	up	Indole-3-acetic acid	C00954	ko00380,ko01100,ko04075	0.87872	1.59801e-06	3
Cluster-121544.1	10.6389	up	--	--	IAA	2.16008	up	Indole-3-acetic acid	C00954	ko00380,ko01100,ko04075	0.841525	1.20131e-05	3
Cluster-121595.1	9.27219	up	K05278	ko00941,ko01100,ko01110	IAA	2.16008	up	Indole-3-acetic acid	C00954	ko00380,ko01100,ko04075	0.874856	2.02786e-06	3
Cluster-121599.1	7.16955	up	--	--	IAA	2.16008	up	Indole-3-acetic acid	C00954	ko00380,ko01100,ko04075	0.804497	5.69228e-05	3
Cluster-121599.6	4.90428	up	--	--	IAA	2.16008	up	Indole-3-acetic acid	C00954	ko00380,ko01100,ko04075	0.889101	8.08016e-07	3
Cluster-121822.3	8.20012	up	K13496	ko00908,ko01110	IAA	2.16008	up	Indole-3-acetic acid	C00954	ko00380,ko01100,ko04075	0.804498	5.69198e-05	3
Cluster-121861.0	5.31045	up	K20557	ko04016	IAA	2.16008	up	Indole-3-acetic acid	C00954	ko00380,ko01100,ko04075	0.89835	4.14858e-07	3
Cluster-121902.1	11.5787	up	K05658	ko02010	IAA	2.16008	up	Indole-3-acetic acid	C00954	ko00380,ko01100,ko04075	0.880152	1.46e-06	3
Cluster-121941.2	7.69355	up	--	--	IAA	2.16008	up	Indole-3-acetic acid	C00954	ko00380,ko01100,ko04075	0.823029	2.73127e-05	3
Cluster-121973.2	2.07126	up	--	--	IAA	2.16008	up	Indole-3-acetic acid	C00954	ko00380,ko01100,ko04075	0.800814	6.52719e-05	3
Cluster-122003.17	8.08205	up	K13506	ko00561,ko00564,ko01100,ko01110	IAA	2.16008	up	Indole-3-acetic acid	C00954	ko00380,ko01100,ko04075	0.818662	3.27109e-05	3
Cluster-122071.1	9.60627	up	K01256	ko00480,ko01100	IAA	2.16008	up	Indole-3-acetic acid	C00954	ko00380,ko01100,ko04075	0.839995	1.29074e-05	3
Cluster-122074.0	7.85636	up	--	--	IAA	2.16008	up	Indole-3-acetic acid	C00954	ko00380,ko01100,ko04075	0.854973	6.1793e-06	3
Cluster-122075.2	3.51465	up	K09753	ko00940,ko01100,ko01110	IAA	2.16008	up	Indole-3-acetic acid	C00954	ko00380,ko01100,ko04075	0.847701	8.92185e-06	3
Cluster-122097.0	10.8816	up	--	--	IAA	2.16008	up	Indole-3-acetic acid	C00954	ko00380,ko01100,ko04075	0.856595	5.67769e-06	3
Cluster-122097.5	4.62324	up	--	--	IAA	2.16008	up	Indole-3-acetic acid	C00954	ko00380,ko01100,ko04075	0.882903	1.22343e-06	3
Cluster-122098.0	4.94032	up	K03885	ko00190,ko01100	IAA	2.16008	up	Indole-3-acetic acid	C00954	ko00380,ko01100,ko04075	0.914803	1.06551e-07	3
Cluster-122107.3	2.0757	up	--	--	IAA	2.16008	up	Indole-3-acetic acid	C00954	ko00380,ko01100,ko04075	0.875115	1.9963e-06	3
Cluster-122157.1	5.61375	up	--	--	IAA	2.16008	up	Indole-3-acetic acid	C00954	ko00380,ko01100,ko04075	0.901014	3.38372e-07	3
Cluster-122166.1	4.21892	insig	--	--	IAA	2.16008	up	Indole-3-acetic acid	C00954	ko00380,ko01100,ko04075	0.829512	2.07075e-05	3
Cluster-122199.4	3.20803	up	K10746	ko03430	IAA	2.16008	up	Indole-3-acetic acid	C00954	ko00380,ko01100,ko04075	0.871983	2.40895e-06	3
Cluster-122288.1	14.5193	up	K19891	ko00500,ko01100	IAA	2.16008	up	Indole-3-acetic acid	C00954	ko00380,ko01100,ko04075	0.875708	1.92538e-06	3
Cluster-122288.4	5.55153	up	K19891	ko00500,ko01100	IAA	2.16008	up	Indole-3-acetic acid	C00954	ko00380,ko01100,ko04075	0.839184	1.34033e-05	3
Cluster-122288.5	10.1054	up	K19891	ko00500,ko01100	IAA	2.16008	up	Indole-3-acetic acid	C00954	ko00380,ko01100,ko04075	0.873066	2.25868e-06	3
Cluster-122368.3	9.47154	up	--	--	IAA	2.16008	up	Indole-3-acetic acid	C00954	ko00380,ko01100,ko04075	0.843531	1.09216e-05	3
Cluster-122368.4	4.40215	up	--	--	IAA	2.16008	up	Indole-3-acetic acid	C00954	ko00380,ko01100,ko04075	0.818546	3.2866e-05	3
Cluster-122372.14	15.106	up	--	--	IAA	2.16008	up	Indole-3-acetic acid	C00954	ko00380,ko01100,ko04075	0.877566	1.71725e-06	3
Cluster-122372.7	5.25676	up	--	--	IAA	2.16008	up	Indole-3-acetic acid	C00954	ko00380,ko01100,ko04075	0.892237	6.48905e-07	3
Cluster-122389.3	9.54328	up	--	--	IAA	2.16008	up	Indole-3-acetic acid	C00954	ko00380,ko01100,ko04075	0.814327	3.8944e-05	3
Cluster-122403.2	2.55557	up	--	--	IAA	2.16008	up	Indole-3-acetic acid	C00954	ko00380,ko01100,ko04075	0.834764	1.64066e-05	3
Cluster-122403.3	4.17999	up	--	--	IAA	2.16008	up	Indole-3-acetic acid	C00954	ko00380,ko01100,ko04075	0.886977	9.33942e-07	3
Cluster-122570.0	1.42316	up	--	--	IAA	2.16008	up	Indole-3-acetic acid	C00954	ko00380,ko01100,ko04075	0.810301	4.56133e-05	3
Cluster-122600.0	8.24707	up	K00966	ko00051,ko00520,ko01100,ko01110,ko01240,ko01250	IAA	2.16008	up	Indole-3-acetic acid	C00954	ko00380,ko01100,ko04075	0.864772	3.64676e-06	3
Cluster-122642.0	11.1147	up	--	--	IAA	2.16008	up	Indole-3-acetic acid	C00954	ko00380,ko01100,ko04075	0.807356	5.10854e-05	3
Cluster-122744.13	8.86718	up	--	--	IAA	2.16008	up	Indole-3-acetic acid	C00954	ko00380,ko01100,ko04075	0.851612	7.34017e-06	3
Cluster-122771.0	3.01935	up	--	--	IAA	2.16008	up	Indole-3-acetic acid	C00954	ko00380,ko01100,ko04075	0.906717	2.14408e-07	3
Cluster-122874.2	9.86156	up	K01047	ko00564,ko00565,ko00590,ko00591,ko00592,ko01100,ko01110	IAA	2.16008	up	Indole-3-acetic acid	C00954	ko00380,ko01100,ko04075	0.877982	1.67344e-06	3
Cluster-122874.7	2.16409	up	K01047	ko00564,ko00565,ko00590,ko00591,ko00592,ko01100,ko01110	IAA	2.16008	up	Indole-3-acetic acid	C00954	ko00380,ko01100,ko04075	0.835754	1.56884e-05	3
Cluster-122874.8	3.72485	up	K01047	ko00564,ko00565,ko00590,ko00591,ko00592,ko01100,ko01110	IAA	2.16008	up	Indole-3-acetic acid	C00954	ko00380,ko01100,ko04075	0.825087	2.50445e-05	3
Cluster-123061.5	3.59762	up	--	--	IAA	2.16008	up	Indole-3-acetic acid	C00954	ko00380,ko01100,ko04075	0.845805	9.78854e-06	3
Cluster-123072.0	10.8059	up	K13993	ko04141	IAA	2.16008	up	Indole-3-acetic acid	C00954	ko00380,ko01100,ko04075	0.91598	9.56944e-08	3
Cluster-123072.1	3.81829	up	K13993	ko04141	IAA	2.16008	up	Indole-3-acetic acid	C00954	ko00380,ko01100,ko04075	0.872145	2.38584e-06	3
Cluster-123124.4	8.97398	up	--	--	IAA	2.16008	up	Indole-3-acetic acid	C00954	ko00380,ko01100,ko04075	0.845977	9.70679e-06	3
Cluster-123158.7	10.7341	up	--	--	IAA	2.16008	up	Indole-3-acetic acid	C00954	ko00380,ko01100,ko04075	0.842441	1.15037e-05	3
Cluster-123184.0	2.49447	up	K13430	ko04626	IAA	2.16008	up	Indole-3-acetic acid	C00954	ko00380,ko01100,ko04075	0.840201	1.27835e-05	3
Cluster-123193.1	1.33998	up	--	--	IAA	2.16008	up	Indole-3-acetic acid	C00954	ko00380,ko01100,ko04075	0.813625	4.00431e-05	3
Cluster-123251.4	3.23704	up	--	--	IAA	2.16008	up	Indole-3-acetic acid	C00954	ko00380,ko01100,ko04075	0.913797	1.16666e-07	3
Cluster-123316.12	2.60983	up	--	--	IAA	2.16008	up	Indole-3-acetic acid	C00954	ko00380,ko01100,ko04075	0.837032	1.48013e-05	3
Cluster-123319.2	2.95181	up	--	--	IAA	2.16008	up	Indole-3-acetic acid	C00954	ko00380,ko01100,ko04075	0.868294	2.98713e-06	3
Cluster-123319.5	4.4953	up	--	--	IAA	2.16008	up	Indole-3-acetic acid	C00954	ko00380,ko01100,ko04075	0.912034	1.36397e-07	3
Cluster-123331.0	2.3996	up	--	--	IAA	2.16008	up	Indole-3-acetic acid	C00954	ko00380,ko01100,ko04075	0.816978	3.50231e-05	3
Cluster-123364.2	8.04433	up	--	--	IAA	2.16008	up	Indole-3-acetic acid	C00954	ko00380,ko01100,ko04075	0.864565	3.68912e-06	3
Cluster-123385.3	2.28382	up	--	--	IAA	2.16008	up	Indole-3-acetic acid	C00954	ko00380,ko01100,ko04075	0.833557	1.73209e-05	3
Cluster-123414.7	3.7312	up	--	--	IAA	2.16008	up	Indole-3-acetic acid	C00954	ko00380,ko01100,ko04075	0.830218	2.00783e-05	3
Cluster-123425.9	12.1807	up	K19891	ko00500,ko01100	IAA	2.16008	up	Indole-3-acetic acid	C00954	ko00380,ko01100,ko04075	0.84112	1.22442e-05	3
Cluster-123435.13	7.8261	up	--	--	IAA	2.16008	up	Indole-3-acetic acid	C00954	ko00380,ko01100,ko04075	0.844857	1.02478e-05	3
Cluster-123491.2	6.88188	up	--	--	IAA	2.16008	up	Indole-3-acetic acid	C00954	ko00380,ko01100,ko04075	0.876585	1.82458e-06	3
Cluster-123497.12	10.5216	up	K02949	ko03010	IAA	2.16008	up	Indole-3-acetic acid	C00954	ko00380,ko01100,ko04075	0.821719	2.88451e-05	3
Cluster-123516.1	8.3861	up	--	--	IAA	2.16008	up	Indole-3-acetic acid	C00954	ko00380,ko01100,ko04075	0.846989	9.23918e-06	3
Cluster-123525.0	3.13592	up	K12191	ko04144	IAA	2.16008	up	Indole-3-acetic acid	C00954	ko00380,ko01100,ko04075	0.861811	4.29466e-06	3
Cluster-123539.0	2.52149	up	--	--	IAA	2.16008	up	Indole-3-acetic acid	C00954	ko00380,ko01100,ko04075	0.817975	3.36379e-05	3
Cluster-123540.9	2.36821	up	--	--	IAA	2.16008	up	Indole-3-acetic acid	C00954	ko00380,ko01100,ko04075	0.903958	2.68306e-07	3
Cluster-123548.3	5.18096	up	K14491	ko04075	IAA	2.16008	up	Indole-3-acetic acid	C00954	ko00380,ko01100,ko04075	0.82284	2.7529e-05	3
Cluster-123617.0	3.35233	up	K00558	ko00270,ko01100	IAA	2.16008	up	Indole-3-acetic acid	C00954	ko00380,ko01100,ko04075	0.87343	2.20993e-06	3
Cluster-123716.3	3.52811	up	K01051	ko00040,ko01100	IAA	2.16008	up	Indole-3-acetic acid	C00954	ko00380,ko01100,ko04075	0.810765	4.47986e-05	3
Cluster-123739.0	3.91465	up	K02113	ko00190,ko00195,ko01100	IAA	2.16008	up	Indole-3-acetic acid	C00954	ko00380,ko01100,ko04075	0.813331	4.05115e-05	3
Cluster-123758.2	9.80874	up	--	--	IAA	2.16008	up	Indole-3-acetic acid	C00954	ko00380,ko01100,ko04075	0.821592	2.89984e-05	3
Cluster-123787.4	13.2322	up	K01188	ko00460,ko00500,ko00999,ko01100,ko01110	IAA	2.16008	up	Indole-3-acetic acid	C00954	ko00380,ko01100,ko04075	0.885587	1.02523e-06	3
Cluster-123793.2	3.83241	up	K01915	ko00220,ko00250,ko00630,ko00910,ko01100,ko01230	IAA	2.16008	up	Indole-3-acetic acid	C00954	ko00380,ko01100,ko04075	0.897116	4.55082e-07	3
Cluster-12383.42	10.6827	up	K14006	ko04141	IAA	2.16008	up	Indole-3-acetic acid	C00954	ko00380,ko01100,ko04075	0.841008	1.23088e-05	3
Cluster-12383.43	2.22484	up	K02324	ko03030,ko03410,ko03420	IAA	2.16008	up	Indole-3-acetic acid	C00954	ko00380,ko01100,ko04075	0.839418	1.32588e-05	3
Cluster-123836.2	6.398	up	--	--	IAA	2.16008	up	Indole-3-acetic acid	C00954	ko00380,ko01100,ko04075	0.873211	2.23918e-06	3
Cluster-123836.6	11.6505	up	--	--	IAA	2.16008	up	Indole-3-acetic acid	C00954	ko00380,ko01100,ko04075	0.888079	8.66649e-07	3
Cluster-123887.2	10.1129	up	K17761	ko00250,ko00650,ko01100	IAA	2.16008	up	Indole-3-acetic acid	C00954	ko00380,ko01100,ko04075	0.83306	1.77097e-05	3
Cluster-123887.8	9.4263	up	K17761	ko00250,ko00650,ko01100	IAA	2.16008	up	Indole-3-acetic acid	C00954	ko00380,ko01100,ko04075	0.882645	1.24409e-06	3
Cluster-123887.9	8.33039	up	K17761	ko00250,ko00650,ko01100	IAA	2.16008	up	Indole-3-acetic acid	C00954	ko00380,ko01100,ko04075	0.885217	1.05075e-06	3
Cluster-124019.0	1.64557	up	--	--	IAA	2.16008	up	Indole-3-acetic acid	C00954	ko00380,ko01100,ko04075	0.802382	6.15967e-05	3
Cluster-124090.4	8.57843	up	--	--	IAA	2.16008	up	Indole-3-acetic acid	C00954	ko00380,ko01100,ko04075	0.898108	4.22499e-07	3
Cluster-124117.2	11.1133	up	--	--	IAA	2.16008	up	Indole-3-acetic acid	C00954	ko00380,ko01100,ko04075	0.844691	1.03301e-05	3
Cluster-124117.3	4.35655	up	--	--	IAA	2.16008	up	Indole-3-acetic acid	C00954	ko00380,ko01100,ko04075	0.859028	4.99146e-06	3
Cluster-124117.5	5.9595	up	--	--	IAA	2.16008	up	Indole-3-acetic acid	C00954	ko00380,ko01100,ko04075	0.852533	7.00462e-06	3
Cluster-124147.2	7.18496	up	--	--	IAA	2.16008	up	Indole-3-acetic acid	C00954	ko00380,ko01100,ko04075	0.888189	8.60182e-07	3
Cluster-124147.3	13.5585	up	--	--	IAA	2.16008	up	Indole-3-acetic acid	C00954	ko00380,ko01100,ko04075	0.909809	1.65373e-07	3
Cluster-124232.6	4.10747	up	K03029	ko03050	IAA	2.16008	up	Indole-3-acetic acid	C00954	ko00380,ko01100,ko04075	0.879197	1.55088e-06	3
Cluster-124232.9	7.69631	up	--	--	IAA	2.16008	up	Indole-3-acetic acid	C00954	ko00380,ko01100,ko04075	0.839078	1.34694e-05	3
Cluster-124268.0	3.5354	up	--	--	IAA	2.16008	up	Indole-3-acetic acid	C00954	ko00380,ko01100,ko04075	0.836369	1.5256e-05	3
Cluster-124314.1	3.36267	up	K00963	ko00040,ko00052,ko00500,ko00520,ko01100,ko01110,ko01240,ko01250	IAA	2.16008	up	Indole-3-acetic acid	C00954	ko00380,ko01100,ko04075	0.872502	2.33588e-06	3
Cluster-124314.2	2.40282	up	--	--	IAA	2.16008	up	Indole-3-acetic acid	C00954	ko00380,ko01100,ko04075	0.857792	5.33047e-06	3
Cluster-124320.2	7.73653	up	--	--	IAA	2.16008	up	Indole-3-acetic acid	C00954	ko00380,ko01100,ko04075	0.800508	6.60098e-05	3
Cluster-124330.4	10.799	up	--	--	IAA	2.16008	up	Indole-3-acetic acid	C00954	ko00380,ko01100,ko04075	0.824061	2.61541e-05	3
Cluster-124330.5	9.60457	up	--	--	IAA	2.16008	up	Indole-3-acetic acid	C00954	ko00380,ko01100,ko04075	0.835337	1.59878e-05	3
Cluster-124357.5	8.29696	up	--	--	IAA	2.16008	up	Indole-3-acetic acid	C00954	ko00380,ko01100,ko04075	0.833814	1.71225e-05	3
Cluster-124381.5	8.08811	up	--	--	IAA	2.16008	up	Indole-3-acetic acid	C00954	ko00380,ko01100,ko04075	0.918916	7.26769e-08	3
Cluster-124383.0	2.35529	up	K10746	ko03430	IAA	2.16008	up	Indole-3-acetic acid	C00954	ko00380,ko01100,ko04075	0.870172	2.67942e-06	3
Cluster-124434.0	7.57708	up	--	--	IAA	2.16008	up	Indole-3-acetic acid	C00954	ko00380,ko01100,ko04075	0.873109	2.25281e-06	3
Cluster-124434.4	9.58537	up	--	--	IAA	2.16008	up	Indole-3-acetic acid	C00954	ko00380,ko01100,ko04075	0.834886	1.63167e-05	3
Cluster-124435.0	3.61971	up	--	--	IAA	2.16008	up	Indole-3-acetic acid	C00954	ko00380,ko01100,ko04075	0.881753	1.31796e-06	3
Cluster-124453.0	1.81627	up	K10808	ko00230,ko00240,ko00480,ko01100,ko01232	IAA	2.16008	up	Indole-3-acetic acid	C00954	ko00380,ko01100,ko04075	0.837364	1.45779e-05	3
Cluster-124453.1	1.51164	up	K10808	ko00230,ko00240,ko00480,ko01100,ko01232	IAA	2.16008	up	Indole-3-acetic acid	C00954	ko00380,ko01100,ko04075	0.835319	1.60008e-05	3
Cluster-124453.3	2.52043	up	K10808	ko00230,ko00240,ko00480,ko01100,ko01232	IAA	2.16008	up	Indole-3-acetic acid	C00954	ko00380,ko01100,ko04075	0.88233	1.26972e-06	3
Cluster-124458.3	10.5291	up	--	--	IAA	2.16008	up	Indole-3-acetic acid	C00954	ko00380,ko01100,ko04075	0.861743	4.31062e-06	3
Cluster-124476.1	1.66099	up	K09523	ko04141	IAA	2.16008	up	Indole-3-acetic acid	C00954	ko00380,ko01100,ko04075	0.899475	3.80913e-07	3
Cluster-124481.4	11.4804	up	K13066	ko00380,ko00940,ko01100,ko01110	IAA	2.16008	up	Indole-3-acetic acid	C00954	ko00380,ko01100,ko04075	0.837033	1.48007e-05	3
Cluster-124481.5	13.3285	up	K13066	ko00380,ko00940,ko01100,ko01110	IAA	2.16008	up	Indole-3-acetic acid	C00954	ko00380,ko01100,ko04075	0.884801	1.08019e-06	3
Cluster-124491.0	3.82713	up	--	--	IAA	2.16008	up	Indole-3-acetic acid	C00954	ko00380,ko01100,ko04075	0.816091	3.62955e-05	3
Cluster-124499.0	9.87781	up	--	--	IAA	2.16008	up	Indole-3-acetic acid	C00954	ko00380,ko01100,ko04075	0.882076	1.29082e-06	3
Cluster-124499.2	9.82973	up	--	--	IAA	2.16008	up	Indole-3-acetic acid	C00954	ko00380,ko01100,ko04075	0.872497	2.3365e-06	3
Cluster-124508.0	2.18738	up	K03004	ko03020	IAA	2.16008	up	Indole-3-acetic acid	C00954	ko00380,ko01100,ko04075	0.816199	3.61385e-05	3
Cluster-124539.1	1.51451	up	K02880	ko03010	IAA	2.16008	up	Indole-3-acetic acid	C00954	ko00380,ko01100,ko04075	0.890799	7.18119e-07	3
Cluster-124539.7	9.70412	up	K02880	ko03010	IAA	2.16008	up	Indole-3-acetic acid	C00954	ko00380,ko01100,ko04075	0.816011	3.64118e-05	3
Cluster-12459.0	8.19887	up	--	--	IAA	2.16008	up	Indole-3-acetic acid	C00954	ko00380,ko01100,ko04075	0.864263	3.7517e-06	3
Cluster-124626.0	2.41915	up	--	--	IAA	2.16008	up	Indole-3-acetic acid	C00954	ko00380,ko01100,ko04075	0.816362	3.59022e-05	3
Cluster-124649.1	11.2542	up	--	--	IAA	2.16008	up	Indole-3-acetic acid	C00954	ko00380,ko01100,ko04075	0.904156	2.64094e-07	3
Cluster-124681.11	11.4562	up	K13436	ko04626	IAA	2.16008	up	Indole-3-acetic acid	C00954	ko00380,ko01100,ko04075	0.889483	7.8697e-07	3
Cluster-124685.0	4.37159	up	--	--	IAA	2.16008	up	Indole-3-acetic acid	C00954	ko00380,ko01100,ko04075	0.811287	4.38966e-05	3
Cluster-124743.0	3.02614	up	--	--	IAA	2.16008	up	Indole-3-acetic acid	C00954	ko00380,ko01100,ko04075	0.861023	4.48289e-06	3
Cluster-124806.4	5.99525	up	--	--	IAA	2.16008	up	Indole-3-acetic acid	C00954	ko00380,ko01100,ko04075	0.83735	1.45867e-05	3
Cluster-124851.1	12.6371	up	--	--	IAA	2.16008	up	Indole-3-acetic acid	C00954	ko00380,ko01100,ko04075	0.819874	3.11291e-05	3
Cluster-124942.1	9.1566	up	K03016	ko03020	IAA	2.16008	up	Indole-3-acetic acid	C00954	ko00380,ko01100,ko04075	0.850875	7.61812e-06	3
Cluster-124949.6	6.68718	up	--	--	IAA	2.16008	up	Indole-3-acetic acid	C00954	ko00380,ko01100,ko04075	0.837107	1.47503e-05	3
Cluster-124955.1	3.89468	up	K19891	ko00500,ko01100	IAA	2.16008	up	Indole-3-acetic acid	C00954	ko00380,ko01100,ko04075	0.803822	5.83808e-05	3
Cluster-124970.0	4.06078	up	--	--	IAA	2.16008	up	Indole-3-acetic acid	C00954	ko00380,ko01100,ko04075	0.893155	6.07796e-07	3
Cluster-124989.3	8.40549	up	--	--	IAA	2.16008	up	Indole-3-acetic acid	C00954	ko00380,ko01100,ko04075	0.800193	6.67751e-05	3
Cluster-125010.6	2.29342	up	--	--	IAA	2.16008	up	Indole-3-acetic acid	C00954	ko00380,ko01100,ko04075	0.87863	1.60704e-06	3
Cluster-125010.7	5.59809	up	K02939	ko03010	IAA	2.16008	up	Indole-3-acetic acid	C00954	ko00380,ko01100,ko04075	0.803533	5.90156e-05	3
Cluster-125011.5	7.72423	up	K01246	ko03410	IAA	2.16008	up	Indole-3-acetic acid	C00954	ko00380,ko01100,ko04075	0.831596	1.88979e-05	3
Cluster-125036.3	10.2162	up	K00766	ko00400,ko01100,ko01110,ko01230	IAA	2.16008	up	Indole-3-acetic acid	C00954	ko00380,ko01100,ko04075	0.886325	9.75812e-07	3
Cluster-125080.2	11.9652	up	--	--	IAA	2.16008	up	Indole-3-acetic acid	C00954	ko00380,ko01100,ko04075	0.86176	4.30653e-06	3
Cluster-125118.1	8.19832	up	--	--	IAA	2.16008	up	Indole-3-acetic acid	C00954	ko00380,ko01100,ko04075	0.851538	7.36753e-06	3
Cluster-125118.2	8.56374	up	--	--	IAA	2.16008	up	Indole-3-acetic acid	C00954	ko00380,ko01100,ko04075	0.884008	1.13818e-06	3
Cluster-125171.0	6.38071	up	--	--	IAA	2.16008	up	Indole-3-acetic acid	C00954	ko00380,ko01100,ko04075	0.804551	5.68076e-05	3
Cluster-125195.4	11.1119	up	K05917	ko00100,ko01100,ko01110	IAA	2.16008	up	Indole-3-acetic acid	C00954	ko00380,ko01100,ko04075	0.82164	2.89401e-05	3
Cluster-125210.0	2.84522	up	--	--	IAA	2.16008	up	Indole-3-acetic acid	C00954	ko00380,ko01100,ko04075	0.835244	1.60551e-05	3
Cluster-125210.1	2.56345	up	--	--	IAA	2.16008	up	Indole-3-acetic acid	C00954	ko00380,ko01100,ko04075	0.878403	1.63007e-06	3
Cluster-125218.8	2.49962	up	--	--	IAA	2.16008	up	Indole-3-acetic acid	C00954	ko00380,ko01100,ko04075	0.824512	2.56619e-05	3
Cluster-125229.3	10.836	up	--	--	IAA	2.16008	up	Indole-3-acetic acid	C00954	ko00380,ko01100,ko04075	0.833717	1.71971e-05	3
Cluster-125229.4	7.61525	up	--	--	IAA	2.16008	up	Indole-3-acetic acid	C00954	ko00380,ko01100,ko04075	0.824725	2.54317e-05	3
Cluster-125229.8	9.14627	up	--	--	IAA	2.16008	up	Indole-3-acetic acid	C00954	ko00380,ko01100,ko04075	0.852164	7.13758e-06	3
Cluster-125285.11	4.97479	up	--	--	IAA	2.16008	up	Indole-3-acetic acid	C00954	ko00380,ko01100,ko04075	0.837904	1.42202e-05	3
Cluster-125285.14	10.4094	up	--	--	IAA	2.16008	up	Indole-3-acetic acid	C00954	ko00380,ko01100,ko04075	0.838475	1.38512e-05	3
Cluster-125285.4	10.3446	up	--	--	IAA	2.16008	up	Indole-3-acetic acid	C00954	ko00380,ko01100,ko04075	0.81993	3.10574e-05	3
Cluster-125311.2	13.4253	up	K08916	ko00196,ko01100	IAA	2.16008	up	Indole-3-acetic acid	C00954	ko00380,ko01100,ko04075	0.891358	6.90489e-07	3
Cluster-125311.4	3.9486	up	K08916	ko00196,ko01100	IAA	2.16008	up	Indole-3-acetic acid	C00954	ko00380,ko01100,ko04075	0.8758	1.91469e-06	3
Cluster-125311.5	5.62434	up	K08916	ko00196,ko01100	IAA	2.16008	up	Indole-3-acetic acid	C00954	ko00380,ko01100,ko04075	0.891958	6.6185e-07	3
Cluster-125342.1	7.619	up	--	--	IAA	2.16008	up	Indole-3-acetic acid	C00954	ko00380,ko01100,ko04075	0.856023	5.85044e-06	3
Cluster-125371.1	2.64245	up	K01872	ko00970	IAA	2.16008	up	Indole-3-acetic acid	C00954	ko00380,ko01100,ko04075	0.86349	3.91627e-06	3
Cluster-125371.9	3.29524	up	K01872	ko00970	IAA	2.16008	up	Indole-3-acetic acid	C00954	ko00380,ko01100,ko04075	0.804799	5.6281e-05	3
Cluster-125372.2	3.28175	up	--	--	IAA	2.16008	up	Indole-3-acetic acid	C00954	ko00380,ko01100,ko04075	0.840972	1.23301e-05	3
Cluster-125469.6	1.5893	up	--	--	IAA	2.16008	up	Indole-3-acetic acid	C00954	ko00380,ko01100,ko04075	0.818466	3.29727e-05	3
Cluster-125476.3	4.34337	up	K14319	ko03013	IAA	2.16008	up	Indole-3-acetic acid	C00954	ko00380,ko01100,ko04075	0.801925	6.26489e-05	3
Cluster-125627.2	5.12456	up	K00660	ko00941,ko00960,ko01100,ko01110,ko04712	IAA	2.16008	up	Indole-3-acetic acid	C00954	ko00380,ko01100,ko04075	0.808202	4.9458e-05	3
Cluster-125685.8	9.26992	up	K02879	ko03010	IAA	2.16008	up	Indole-3-acetic acid	C00954	ko00380,ko01100,ko04075	0.812367	4.20794e-05	3
Cluster-125778.3	6.92504	up	K00939	ko00230,ko00730,ko01100,ko01110,ko01232,ko01240	IAA	2.16008	up	Indole-3-acetic acid	C00954	ko00380,ko01100,ko04075	0.808552	4.87989e-05	3
Cluster-125831.6	2.51049	up	K07897	ko04144,ko04145	IAA	2.16008	up	Indole-3-acetic acid	C00954	ko00380,ko01100,ko04075	0.861474	4.3743e-06	3
Cluster-125892.1	7.05453	up	--	--	IAA	2.16008	up	Indole-3-acetic acid	C00954	ko00380,ko01100,ko04075	0.827374	2.27149e-05	3
Cluster-125911.17	8.91101	up	K13459	ko04626	IAA	2.16008	up	Indole-3-acetic acid	C00954	ko00380,ko01100,ko04075	0.875076	2.00104e-06	3
Cluster-125911.7	7.52824	up	K13459	ko04626	IAA	2.16008	up	Indole-3-acetic acid	C00954	ko00380,ko01100,ko04075	0.823801	2.64423e-05	3
Cluster-125911.8	3.88221	up	K13459	ko04626	IAA	2.16008	up	Indole-3-acetic acid	C00954	ko00380,ko01100,ko04075	0.857734	5.34698e-06	3
Cluster-125932.3	3.85061	up	--	--	IAA	2.16008	up	Indole-3-acetic acid	C00954	ko00380,ko01100,ko04075	0.868482	2.955e-06	3
Cluster-125960.0	2.87301	up	K13384	ko00950,ko01100,ko01110	IAA	2.16008	up	Indole-3-acetic acid	C00954	ko00380,ko01100,ko04075	0.85548	6.01863e-06	3
Cluster-126029.4	3.93528	up	--	--	IAA	2.16008	up	Indole-3-acetic acid	C00954	ko00380,ko01100,ko04075	0.840335	1.27036e-05	3
Cluster-126142.2	10.0171	up	K01593	ko00350,ko00360,ko00380,ko00901,ko00950,ko00965,ko01100,ko01110	IAA	2.16008	up	Indole-3-acetic acid	C00954	ko00380,ko01100,ko04075	0.863074	4.00721e-06	3
Cluster-126142.3	3.00943	up	K01593	ko00350,ko00360,ko00380,ko00901,ko00950,ko00965,ko01100,ko01110	IAA	2.16008	up	Indole-3-acetic acid	C00954	ko00380,ko01100,ko04075	0.84414	1.06075e-05	3
Cluster-126188.6	7.24382	up	--	--	IAA	2.16008	up	Indole-3-acetic acid	C00954	ko00380,ko01100,ko04075	0.840378	1.26779e-05	3
Cluster-126219.1	1.99323	up	K03657	ko03420,ko03430	IAA	2.16008	up	Indole-3-acetic acid	C00954	ko00380,ko01100,ko04075	0.835958	1.55439e-05	3
Cluster-126222.1	4.34538	up	--	--	IAA	2.16008	up	Indole-3-acetic acid	C00954	ko00380,ko01100,ko04075	0.84336	1.10116e-05	3
Cluster-126243.0	6.88398	up	K08908	ko00196,ko01100	IAA	2.16008	up	Indole-3-acetic acid	C00954	ko00380,ko01100,ko04075	0.836276	1.53205e-05	3
Cluster-126243.1	4.27815	up	K08908	ko00196,ko01100	IAA	2.16008	up	Indole-3-acetic acid	C00954	ko00380,ko01100,ko04075	0.876637	1.81881e-06	3
Cluster-126243.2	8.91702	up	K08908	ko00196,ko01100	IAA	2.16008	up	Indole-3-acetic acid	C00954	ko00380,ko01100,ko04075	0.896584	4.73457e-07	3
Cluster-126278.2	8.02272	up	--	--	IAA	2.16008	up	Indole-3-acetic acid	C00954	ko00380,ko01100,ko04075	0.832214	1.83883e-05	3
Cluster-126303.2	3.09713	up	--	--	IAA	2.16008	up	Indole-3-acetic acid	C00954	ko00380,ko01100,ko04075	0.873112	2.25236e-06	3
Cluster-126326.0	10.8819	up	--	--	IAA	2.16008	up	Indole-3-acetic acid	C00954	ko00380,ko01100,ko04075	0.869303	2.81826e-06	3
Cluster-126337.4	1.32329	up	K00975	ko00500,ko00520,ko01100,ko01110,ko01250	IAA	2.16008	up	Indole-3-acetic acid	C00954	ko00380,ko01100,ko04075	0.806856	5.2068e-05	3
Cluster-126427.4	11.7213	up	--	--	IAA	2.16008	up	Indole-3-acetic acid	C00954	ko00380,ko01100,ko04075	0.903784	2.72074e-07	3
Cluster-126427.6	2.59402	up	--	--	IAA	2.16008	up	Indole-3-acetic acid	C00954	ko00380,ko01100,ko04075	0.905193	2.42886e-07	3
Cluster-126466.1	3.04116	up	--	--	IAA	2.16008	up	Indole-3-acetic acid	C00954	ko00380,ko01100,ko04075	0.901211	3.33225e-07	3
Cluster-126484.4	10.709	up	--	--	IAA	2.16008	up	Indole-3-acetic acid	C00954	ko00380,ko01100,ko04075	0.835653	1.57608e-05	3
Cluster-126515.3	1.81328	up	--	--	IAA	2.16008	up	Indole-3-acetic acid	C00954	ko00380,ko01100,ko04075	0.845889	9.74845e-06	3
Cluster-126515.6	12.1242	up	--	--	IAA	2.16008	up	Indole-3-acetic acid	C00954	ko00380,ko01100,ko04075	0.888996	8.13873e-07	3
Cluster-126578.0	5.66428	up	--	--	IAA	2.16008	up	Indole-3-acetic acid	C00954	ko00380,ko01100,ko04075	0.861819	4.29272e-06	3
Cluster-126627.1	4.28978	up	--	--	IAA	2.16008	up	Indole-3-acetic acid	C00954	ko00380,ko01100,ko04075	0.836833	1.49362e-05	3
Cluster-126627.5	10.288	up	--	--	IAA	2.16008	up	Indole-3-acetic acid	C00954	ko00380,ko01100,ko04075	0.890739	7.21173e-07	3
Cluster-126747.0	5.54093	up	--	--	IAA	2.16008	up	Indole-3-acetic acid	C00954	ko00380,ko01100,ko04075	0.876988	1.77984e-06	3
Cluster-126760.0	4.25795	up	--	--	IAA	2.16008	up	Indole-3-acetic acid	C00954	ko00380,ko01100,ko04075	0.880658	1.41373e-06	3
Cluster-126777.7	10.9892	up	K01183	ko00520,ko01100	IAA	2.16008	up	Indole-3-acetic acid	C00954	ko00380,ko01100,ko04075	0.834854	1.63405e-05	3
Cluster-126829.0	10.4665	up	K01698	ko00860,ko01100,ko01110,ko01240	IAA	2.16008	up	Indole-3-acetic acid	C00954	ko00380,ko01100,ko04075	0.800393	6.62873e-05	3
Cluster-126881.0	2.71994	up	--	--	IAA	2.16008	up	Indole-3-acetic acid	C00954	ko00380,ko01100,ko04075	0.876689	1.81295e-06	3
Cluster-126881.1	2.67268	up	--	--	IAA	2.16008	up	Indole-3-acetic acid	C00954	ko00380,ko01100,ko04075	0.883943	1.143e-06	3
Cluster-126897.0	2.62853	up	--	--	IAA	2.16008	up	Indole-3-acetic acid	C00954	ko00380,ko01100,ko04075	0.875236	1.98167e-06	3
Cluster-126914.5	7.03519	up	K03097	ko03008,ko04712	IAA	2.16008	up	Indole-3-acetic acid	C00954	ko00380,ko01100,ko04075	0.863636	3.88463e-06	3
Cluster-127009.0	4.44033	up	--	--	IAA	2.16008	up	Indole-3-acetic acid	C00954	ko00380,ko01100,ko04075	0.850275	7.85136e-06	3
Cluster-127026.0	3.59184	up	--	--	IAA	2.16008	up	Indole-3-acetic acid	C00954	ko00380,ko01100,ko04075	0.8628	4.06811e-06	3
Cluster-127125.0	4.54872	up	--	--	IAA	2.16008	up	Indole-3-acetic acid	C00954	ko00380,ko01100,ko04075	0.881129	1.37182e-06	3
Cluster-127181.0	5.25398	up	--	--	IAA	2.16008	up	Indole-3-acetic acid	C00954	ko00380,ko01100,ko04075	0.866203	3.36502e-06	3
Cluster-127181.1	7.54708	up	--	--	IAA	2.16008	up	Indole-3-acetic acid	C00954	ko00380,ko01100,ko04075	0.813664	3.99809e-05	3
Cluster-127181.8	11.2664	up	--	--	IAA	2.16008	up	Indole-3-acetic acid	C00954	ko00380,ko01100,ko04075	0.800267	6.65959e-05	3
Cluster-127183.0	1.66732	up	K00434	ko00053,ko00480,ko01100	IAA	2.16008	up	Indole-3-acetic acid	C00954	ko00380,ko01100,ko04075	0.82742	2.26702e-05	3
Cluster-127191.2	4.45882	up	--	--	IAA	2.16008	up	Indole-3-acetic acid	C00954	ko00380,ko01100,ko04075	0.863004	4.02272e-06	3
Cluster-127243.0	1.82492	up	--	--	IAA	2.16008	up	Indole-3-acetic acid	C00954	ko00380,ko01100,ko04075	0.81637	3.58907e-05	3
Cluster-127300.0	7.43767	up	K10740	ko03030,ko03420,ko03430,ko03440	IAA	2.16008	up	Indole-3-acetic acid	C00954	ko00380,ko01100,ko04075	0.91021	1.59786e-07	3
Cluster-127300.1	9.54434	up	K10740	ko03030,ko03420,ko03430,ko03440	IAA	2.16008	up	Indole-3-acetic acid	C00954	ko00380,ko01100,ko04075	0.820901	2.98391e-05	3
Cluster-127301.2	4.5749	up	--	--	IAA	2.16008	up	Indole-3-acetic acid	C00954	ko00380,ko01100,ko04075	0.84254	1.14497e-05	3
Cluster-127302.5	12.1937	up	K15403	ko00073	IAA	2.16008	up	Indole-3-acetic acid	C00954	ko00380,ko01100,ko04075	0.901658	3.21828e-07	3
Cluster-127309.5	8.81495	up	K01661	ko00130,ko01100,ko01110,ko01240	IAA	2.16008	up	Indole-3-acetic acid	C00954	ko00380,ko01100,ko04075	0.824684	2.54756e-05	3
Cluster-127312.0	6.92448	up	--	--	IAA	2.16008	up	Indole-3-acetic acid	C00954	ko00380,ko01100,ko04075	0.898612	4.06755e-07	3
Cluster-127428.5	11.0218	up	--	--	IAA	2.16008	up	Indole-3-acetic acid	C00954	ko00380,ko01100,ko04075	0.824551	2.5619e-05	3
Cluster-127440.1	9.94282	up	--	--	IAA	2.16008	up	Indole-3-acetic acid	C00954	ko00380,ko01100,ko04075	0.851373	7.42937e-06	3
Cluster-127456.6	9.50515	up	--	--	IAA	2.16008	up	Indole-3-acetic acid	C00954	ko00380,ko01100,ko04075	0.886771	9.46984e-07	3
Cluster-127456.8	4.24471	up	--	--	IAA	2.16008	up	Indole-3-acetic acid	C00954	ko00380,ko01100,ko04075	0.869464	2.79212e-06	3
Cluster-127542.0	3.28345	up	--	--	IAA	2.16008	up	Indole-3-acetic acid	C00954	ko00380,ko01100,ko04075	0.867527	3.12123e-06	3
Cluster-127542.1	2.7275	up	--	--	IAA	2.16008	up	Indole-3-acetic acid	C00954	ko00380,ko01100,ko04075	0.81116	4.41135e-05	3
Cluster-127554.4	2.5722	up	--	--	IAA	2.16008	up	Indole-3-acetic acid	C00954	ko00380,ko01100,ko04075	0.867047	3.20781e-06	3
Cluster-127631.4	1.92871	up	--	--	IAA	2.16008	up	Indole-3-acetic acid	C00954	ko00380,ko01100,ko04075	0.89808	4.23406e-07	3
Cluster-127631.6	2.51271	up	--	--	IAA	2.16008	up	Indole-3-acetic acid	C00954	ko00380,ko01100,ko04075	0.830957	1.94376e-05	3
Cluster-127642.6	11.3109	up	K19892	ko00500,ko01100	IAA	2.16008	up	Indole-3-acetic acid	C00954	ko00380,ko01100,ko04075	0.825894	2.42005e-05	3
Cluster-127652.2	8.80337	up	--	--	IAA	2.16008	up	Indole-3-acetic acid	C00954	ko00380,ko01100,ko04075	0.834255	1.67872e-05	3
Cluster-127690.0	7.61568	up	--	--	IAA	2.16008	up	Indole-3-acetic acid	C00954	ko00380,ko01100,ko04075	0.872975	2.27091e-06	3
Cluster-127699.1	3.21516	up	--	--	IAA	2.16008	up	Indole-3-acetic acid	C00954	ko00380,ko01100,ko04075	0.885104	1.05872e-06	3
Cluster-127699.2	2.85092	up	--	--	IAA	2.16008	up	Indole-3-acetic acid	C00954	ko00380,ko01100,ko04075	0.873284	2.22935e-06	3
Cluster-127699.3	3.08807	up	--	--	IAA	2.16008	up	Indole-3-acetic acid	C00954	ko00380,ko01100,ko04075	0.813953	3.95274e-05	3
Cluster-127699.4	3.48349	up	--	--	IAA	2.16008	up	Indole-3-acetic acid	C00954	ko00380,ko01100,ko04075	0.816255	3.60575e-05	3
Cluster-127712.4	11.1257	up	--	--	IAA	2.16008	up	Indole-3-acetic acid	C00954	ko00380,ko01100,ko04075	0.884729	1.08534e-06	3
Cluster-127737.0	3.00018	up	K02698	ko00195,ko01100	IAA	2.16008	up	Indole-3-acetic acid	C00954	ko00380,ko01100,ko04075	0.834905	1.63027e-05	3
Cluster-127804.5	5.49358	up	--	--	IAA	2.16008	up	Indole-3-acetic acid	C00954	ko00380,ko01100,ko04075	0.816525	3.56688e-05	3
Cluster-127861.1	3.29916	up	--	--	IAA	2.16008	up	Indole-3-acetic acid	C00954	ko00380,ko01100,ko04075	0.945762	3.17419e-09	3
Cluster-127884.1	11.807	up	--	--	IAA	2.16008	up	Indole-3-acetic acid	C00954	ko00380,ko01100,ko04075	0.862046	4.23979e-06	3
Cluster-127884.8	9.06906	up	--	--	IAA	2.16008	up	Indole-3-acetic acid	C00954	ko00380,ko01100,ko04075	0.882469	1.25838e-06	3
Cluster-127916.0	2.97506	up	--	--	IAA	2.16008	up	Indole-3-acetic acid	C00954	ko00380,ko01100,ko04075	0.862585	4.11641e-06	3
Cluster-127947.4	6.08094	up	--	--	IAA	2.16008	up	Indole-3-acetic acid	C00954	ko00380,ko01100,ko04075	0.814748	3.8297e-05	3
Cluster-128008.2	1.91502	up	K01488	ko00230,ko01100,ko01232	IAA	2.16008	up	Indole-3-acetic acid	C00954	ko00380,ko01100,ko04075	0.861223	4.43442e-06	3
Cluster-128011.5	9.31679	up	--	--	IAA	2.16008	up	Indole-3-acetic acid	C00954	ko00380,ko01100,ko04075	0.830245	2.00548e-05	3
Cluster-128022.0	8.93125	up	--	--	IAA	2.16008	up	Indole-3-acetic acid	C00954	ko00380,ko01100,ko04075	0.859235	4.93648e-06	3
Cluster-128022.4	10.7099	up	--	--	IAA	2.16008	up	Indole-3-acetic acid	C00954	ko00380,ko01100,ko04075	0.832318	1.83036e-05	3
Cluster-128047.0	4.60243	up	--	--	IAA	2.16008	up	Indole-3-acetic acid	C00954	ko00380,ko01100,ko04075	0.861932	4.2665e-06	3
Cluster-12807.1	2.88037	up	--	--	IAA	2.16008	up	Indole-3-acetic acid	C00954	ko00380,ko01100,ko04075	0.831794	1.87331e-05	3
Cluster-128076.154	7.78636	up	--	--	IAA	2.16008	up	Indole-3-acetic acid	C00954	ko00380,ko01100,ko04075	0.823266	2.70427e-05	3
Cluster-128076.58	3.76633	up	--	--	IAA	2.16008	up	Indole-3-acetic acid	C00954	ko00380,ko01100,ko04075	0.830391	1.99265e-05	3
Cluster-128115.10	8.53445	up	K13993	ko04141	IAA	2.16008	up	Indole-3-acetic acid	C00954	ko00380,ko01100,ko04075	0.85395	6.51456e-06	3
Cluster-128115.11	5.96096	up	K13993	ko04141	IAA	2.16008	up	Indole-3-acetic acid	C00954	ko00380,ko01100,ko04075	0.896921	4.61732e-07	3
Cluster-128115.15	9.26682	up	K13993	ko04141	IAA	2.16008	up	Indole-3-acetic acid	C00954	ko00380,ko01100,ko04075	0.886786	9.46049e-07	3
Cluster-128115.17	9.51405	up	K13993	ko04141	IAA	2.16008	up	Indole-3-acetic acid	C00954	ko00380,ko01100,ko04075	0.804579	5.67479e-05	3
Cluster-128115.2	7.69989	up	K13993	ko04141	IAA	2.16008	up	Indole-3-acetic acid	C00954	ko00380,ko01100,ko04075	0.907319	2.03987e-07	3
Cluster-128115.26	9.4053	up	K13993	ko04141	IAA	2.16008	up	Indole-3-acetic acid	C00954	ko00380,ko01100,ko04075	0.899933	3.67806e-07	3
Cluster-128115.38	10.9901	up	K13993	ko04141	IAA	2.16008	up	Indole-3-acetic acid	C00954	ko00380,ko01100,ko04075	0.812671	4.15782e-05	3
Cluster-128115.41	10.4536	up	K13993	ko04141	IAA	2.16008	up	Indole-3-acetic acid	C00954	ko00380,ko01100,ko04075	0.828525	2.16146e-05	3
Cluster-128115.42	12.7741	up	K13993	ko04141	IAA	2.16008	up	Indole-3-acetic acid	C00954	ko00380,ko01100,ko04075	0.882448	1.26006e-06	3
Cluster-128115.43	8.50106	up	K13993	ko04141	IAA	2.16008	up	Indole-3-acetic acid	C00954	ko00380,ko01100,ko04075	0.888477	8.43382e-07	3
Cluster-128115.44	11.6678	up	K13993	ko04141	IAA	2.16008	up	Indole-3-acetic acid	C00954	ko00380,ko01100,ko04075	0.896749	4.67692e-07	3
Cluster-128115.45	12.3399	up	K13993	ko04141	IAA	2.16008	up	Indole-3-acetic acid	C00954	ko00380,ko01100,ko04075	0.887036	9.30209e-07	3
Cluster-128115.47	12.2975	up	K13993	ko04141	IAA	2.16008	up	Indole-3-acetic acid	C00954	ko00380,ko01100,ko04075	0.911337	1.44963e-07	3
Cluster-128115.48	14.3644	up	K13993	ko04141	IAA	2.16008	up	Indole-3-acetic acid	C00954	ko00380,ko01100,ko04075	0.909048	1.76436e-07	3
Cluster-128115.49	12.7487	up	K13993	ko04141	IAA	2.16008	up	Indole-3-acetic acid	C00954	ko00380,ko01100,ko04075	0.901752	3.19472e-07	3
Cluster-128115.54	14.1112	up	K13993	ko04141	IAA	2.16008	up	Indole-3-acetic acid	C00954	ko00380,ko01100,ko04075	0.854968	6.18088e-06	3
Cluster-128115.8	2.0353	up	K13993	ko04141	IAA	2.16008	up	Indole-3-acetic acid	C00954	ko00380,ko01100,ko04075	0.869671	2.75878e-06	3
Cluster-128123.1	6.92572	up	--	--	IAA	2.16008	up	Indole-3-acetic acid	C00954	ko00380,ko01100,ko04075	0.83469	1.64617e-05	3
Cluster-128129.3	9.86661	up	K10683	ko03440	IAA	2.16008	up	Indole-3-acetic acid	C00954	ko00380,ko01100,ko04075	0.803922	5.81619e-05	3
Cluster-128129.5	8.56518	up	K10683	ko03440	IAA	2.16008	up	Indole-3-acetic acid	C00954	ko00380,ko01100,ko04075	0.82603	2.40613e-05	3
Cluster-128129.6	11.3777	up	K10683	ko03440	IAA	2.16008	up	Indole-3-acetic acid	C00954	ko00380,ko01100,ko04075	0.811726	4.31496e-05	3
Cluster-128131.3	6.57582	up	--	--	IAA	2.16008	up	Indole-3-acetic acid	C00954	ko00380,ko01100,ko04075	0.810178	4.58305e-05	3
Cluster-128192.2	1.28378	up	--	--	IAA	2.16008	up	Indole-3-acetic acid	C00954	ko00380,ko01100,ko04075	0.801716	6.31349e-05	3
Cluster-128195.2	5.53376	up	--	--	IAA	2.16008	up	Indole-3-acetic acid	C00954	ko00380,ko01100,ko04075	0.859321	4.91365e-06	3
Cluster-128209.1	10.0191	up	K09837	ko00906,ko01100,ko01110	IAA	2.16008	up	Indole-3-acetic acid	C00954	ko00380,ko01100,ko04075	0.868164	3.00959e-06	3
Cluster-128209.3	5.58772	up	K09837	ko00906,ko01100,ko01110	IAA	2.16008	up	Indole-3-acetic acid	C00954	ko00380,ko01100,ko04075	0.81816	3.33865e-05	3
Cluster-128234.2	8.55412	up	--	--	IAA	2.16008	up	Indole-3-acetic acid	C00954	ko00380,ko01100,ko04075	0.913483	1.19982e-07	3
Cluster-128310.4	2.13352	up	--	--	IAA	2.16008	up	Indole-3-acetic acid	C00954	ko00380,ko01100,ko04075	0.833908	1.70503e-05	3
Cluster-128310.6	1.48281	up	--	--	IAA	2.16008	up	Indole-3-acetic acid	C00954	ko00380,ko01100,ko04075	0.825992	2.40995e-05	3
Cluster-128333.0	8.98476	up	--	--	IAA	2.16008	up	Indole-3-acetic acid	C00954	ko00380,ko01100,ko04075	0.819241	3.19473e-05	3
Cluster-128333.5	13.881	up	K03860	ko00563,ko01100	IAA	2.16008	up	Indole-3-acetic acid	C00954	ko00380,ko01100,ko04075	0.867987	3.04018e-06	3
Cluster-128484.2	9.05433	up	K19891	ko00500,ko01100	IAA	2.16008	up	Indole-3-acetic acid	C00954	ko00380,ko01100,ko04075	0.877452	1.72944e-06	3
Cluster-128491.2	7.36289	up	--	--	IAA	2.16008	up	Indole-3-acetic acid	C00954	ko00380,ko01100,ko04075	0.836945	1.48599e-05	3
Cluster-128492.0	1.04629	up	--	--	IAA	2.16008	up	Indole-3-acetic acid	C00954	ko00380,ko01100,ko04075	0.883502	1.17651e-06	3
Cluster-12860.0	7.15008	up	--	--	IAA	2.16008	up	Indole-3-acetic acid	C00954	ko00380,ko01100,ko04075	0.806347	5.30834e-05	3
Cluster-128605.0	3.30924	up	K10781	ko00061,ko01100,ko01212	IAA	2.16008	up	Indole-3-acetic acid	C00954	ko00380,ko01100,ko04075	0.892434	6.39898e-07	3
Cluster-128648.0	3.48215	up	K12128	ko04712	IAA	2.16008	up	Indole-3-acetic acid	C00954	ko00380,ko01100,ko04075	0.92568	3.69989e-08	3
Cluster-128735.7	12.7032	up	K00787	ko00900,ko01100,ko01110	IAA	2.16008	up	Indole-3-acetic acid	C00954	ko00380,ko01100,ko04075	0.825542	2.45661e-05	3
Cluster-128744.5	9.9907	up	--	--	IAA	2.16008	up	Indole-3-acetic acid	C00954	ko00380,ko01100,ko04075	0.879594	1.51254e-06	3
Cluster-128776.1	11.5265	up	K00895	ko00010,ko00030,ko00051,ko01100,ko01110	IAA	2.16008	up	Indole-3-acetic acid	C00954	ko00380,ko01100,ko04075	0.810506	4.52519e-05	3
Cluster-128856.0	12.1955	up	K13415	ko04075	IAA	2.16008	up	Indole-3-acetic acid	C00954	ko00380,ko01100,ko04075	0.822504	2.7919e-05	3
Cluster-128856.3	12.151	up	K13415	ko04075	IAA	2.16008	up	Indole-3-acetic acid	C00954	ko00380,ko01100,ko04075	0.80451	5.68945e-05	3
Cluster-128859.6	8.56237	up	--	--	IAA	2.16008	up	Indole-3-acetic acid	C00954	ko00380,ko01100,ko04075	0.802361	6.16457e-05	3
Cluster-128872.4	2.35707	up	--	--	IAA	2.16008	up	Indole-3-acetic acid	C00954	ko00380,ko01100,ko04075	0.827671	2.24271e-05	3
Cluster-128877.1	11.7386	up	K05658	ko02010	IAA	2.16008	up	Indole-3-acetic acid	C00954	ko00380,ko01100,ko04075	0.810223	4.57512e-05	3
Cluster-128904.10	7.90064	up	--	--	IAA	2.16008	up	Indole-3-acetic acid	C00954	ko00380,ko01100,ko04075	0.802857	6.05193e-05	3
Cluster-128904.6	9.6618	up	--	--	IAA	2.16008	up	Indole-3-acetic acid	C00954	ko00380,ko01100,ko04075	0.826632	2.34495e-05	3
Cluster-128905.8	10.3439	up	--	--	IAA	2.16008	up	Indole-3-acetic acid	C00954	ko00380,ko01100,ko04075	0.863879	3.83268e-06	3
Cluster-128920.0	2.86054	up	--	--	IAA	2.16008	up	Indole-3-acetic acid	C00954	ko00380,ko01100,ko04075	0.847155	9.16428e-06	3
Cluster-128994.1	9.64958	up	--	--	IAA	2.16008	up	Indole-3-acetic acid	C00954	ko00380,ko01100,ko04075	0.819083	3.21539e-05	3
Cluster-129006.0	11.1974	up	K10615	ko04120	IAA	2.16008	up	Indole-3-acetic acid	C00954	ko00380,ko01100,ko04075	0.81332	4.05282e-05	3
Cluster-129098.4	10.3175	up	K01859	ko00941,ko01100,ko01110	IAA	2.16008	up	Indole-3-acetic acid	C00954	ko00380,ko01100,ko04075	0.894468	5.52918e-07	3
Cluster-129133.10	8.62418	up	--	--	IAA	2.16008	up	Indole-3-acetic acid	C00954	ko00380,ko01100,ko04075	0.838138	1.40679e-05	3
Cluster-129152.12	3.84259	up	--	--	IAA	2.16008	up	Indole-3-acetic acid	C00954	ko00380,ko01100,ko04075	0.817542	3.42341e-05	3
Cluster-129152.5	10.7892	up	--	--	IAA	2.16008	up	Indole-3-acetic acid	C00954	ko00380,ko01100,ko04075	0.861968	4.25811e-06	3
Cluster-129195.10	2.04587	up	--	--	IAA	2.16008	up	Indole-3-acetic acid	C00954	ko00380,ko01100,ko04075	0.893313	6.00949e-07	3
Cluster-129195.2	2.04251	up	--	--	IAA	2.16008	up	Indole-3-acetic acid	C00954	ko00380,ko01100,ko04075	0.828945	2.12245e-05	3
Cluster-129195.6	2.3635	up	--	--	IAA	2.16008	up	Indole-3-acetic acid	C00954	ko00380,ko01100,ko04075	0.842685	1.1371e-05	3
Cluster-129196.2	10.0418	up	K04392	ko04145	IAA	2.16008	up	Indole-3-acetic acid	C00954	ko00380,ko01100,ko04075	0.873908	2.14737e-06	3
Cluster-129196.5	9.28233	up	K04392	ko04145	IAA	2.16008	up	Indole-3-acetic acid	C00954	ko00380,ko01100,ko04075	0.81698	3.50206e-05	3
Cluster-129196.7	1.35277	up	K04392	ko04145	IAA	2.16008	up	Indole-3-acetic acid	C00954	ko00380,ko01100,ko04075	0.813212	4.07015e-05	3
Cluster-129210.0	6.02074	up	--	--	IAA	2.16008	up	Indole-3-acetic acid	C00954	ko00380,ko01100,ko04075	0.823248	2.70638e-05	3
Cluster-129220.0	10.429	up	--	--	IAA	2.16008	up	Indole-3-acetic acid	C00954	ko00380,ko01100,ko04075	0.859966	4.74643e-06	3
Cluster-12930.0	6.7593	up	--	--	IAA	2.16008	up	Indole-3-acetic acid	C00954	ko00380,ko01100,ko04075	0.802125	6.21874e-05	3
Cluster-129402.2	7.01064	up	--	--	IAA	2.16008	up	Indole-3-acetic acid	C00954	ko00380,ko01100,ko04075	0.81645	3.57765e-05	3
Cluster-129402.7	2.72206	up	--	--	IAA	2.16008	up	Indole-3-acetic acid	C00954	ko00380,ko01100,ko04075	0.876191	1.86936e-06	3
Cluster-129477.2	8.72536	up	--	--	IAA	2.16008	up	Indole-3-acetic acid	C00954	ko00380,ko01100,ko04075	0.803317	5.94913e-05	3
Cluster-129528.1	4.98131	up	--	--	IAA	2.16008	up	Indole-3-acetic acid	C00954	ko00380,ko01100,ko04075	0.861801	4.29704e-06	3
Cluster-129532.3	3.82288	up	--	--	IAA	2.16008	up	Indole-3-acetic acid	C00954	ko00380,ko01100,ko04075	0.886408	9.70435e-07	3
Cluster-129571.4	12.0711	up	--	--	IAA	2.16008	up	Indole-3-acetic acid	C00954	ko00380,ko01100,ko04075	0.816138	3.62272e-05	3
Cluster-129571.5	10.2999	up	--	--	IAA	2.16008	up	Indole-3-acetic acid	C00954	ko00380,ko01100,ko04075	0.843375	1.10034e-05	3
Cluster-129571.8	6.88142	up	--	--	IAA	2.16008	up	Indole-3-acetic acid	C00954	ko00380,ko01100,ko04075	0.819001	3.22612e-05	3
Cluster-129572.6	4.00131	up	--	--	IAA	2.16008	up	Indole-3-acetic acid	C00954	ko00380,ko01100,ko04075	0.860777	4.54298e-06	3
Cluster-129618.9	5.4143	up	--	--	IAA	2.16008	up	Indole-3-acetic acid	C00954	ko00380,ko01100,ko04075	0.883299	1.19223e-06	3
Cluster-129647.17	3.40672	up	--	--	IAA	2.16008	up	Indole-3-acetic acid	C00954	ko00380,ko01100,ko04075	0.80538	5.50631e-05	3
Cluster-129668.10	12.6555	up	K19891	ko00500,ko01100	IAA	2.16008	up	Indole-3-acetic acid	C00954	ko00380,ko01100,ko04075	0.892922	6.18001e-07	3
Cluster-129676.4	2.53264	up	--	--	IAA	2.16008	up	Indole-3-acetic acid	C00954	ko00380,ko01100,ko04075	0.885612	1.02349e-06	3
Cluster-129676.5	3.79153	up	--	--	IAA	2.16008	up	Indole-3-acetic acid	C00954	ko00380,ko01100,ko04075	0.867256	3.16991e-06	3
Cluster-129697.3	10.1739	up	K13416	ko04016,ko04075,ko04626	IAA	2.16008	up	Indole-3-acetic acid	C00954	ko00380,ko01100,ko04075	0.899692	3.74664e-07	3
Cluster-129697.9	8.356	up	--	--	IAA	2.16008	up	Indole-3-acetic acid	C00954	ko00380,ko01100,ko04075	0.84745	9.03254e-06	3
Cluster-129715.0	5.30582	up	--	--	IAA	2.16008	up	Indole-3-acetic acid	C00954	ko00380,ko01100,ko04075	0.855152	6.12215e-06	3
Cluster-129788.3	9.16466	up	K14432	ko04075	IAA	2.16008	up	Indole-3-acetic acid	C00954	ko00380,ko01100,ko04075	0.848841	8.43315e-06	3
Cluster-129788.4	9.54153	up	K14432	ko04075	IAA	2.16008	up	Indole-3-acetic acid	C00954	ko00380,ko01100,ko04075	0.862895	4.04686e-06	3
Cluster-129793.3	4.59768	up	--	--	IAA	2.16008	up	Indole-3-acetic acid	C00954	ko00380,ko01100,ko04075	0.875089	1.99946e-06	3
Cluster-129793.6	11.1437	up	--	--	IAA	2.16008	up	Indole-3-acetic acid	C00954	ko00380,ko01100,ko04075	0.895449	5.14754e-07	3
Cluster-129847.0	9.74744	up	--	--	IAA	2.16008	up	Indole-3-acetic acid	C00954	ko00380,ko01100,ko04075	0.893554	5.90626e-07	3
Cluster-129847.1	3.35436	insig	--	--	IAA	2.16008	up	Indole-3-acetic acid	C00954	ko00380,ko01100,ko04075	0.887392	9.08094e-07	3
Cluster-129853.10	9.01484	up	--	--	IAA	2.16008	up	Indole-3-acetic acid	C00954	ko00380,ko01100,ko04075	0.868306	2.9851e-06	3
Cluster-129857.0	1.81405	up	K00850	ko00010,ko00030,ko00051,ko00052,ko01100,ko01110,ko01200,ko01230,ko03018	IAA	2.16008	up	Indole-3-acetic acid	C00954	ko00380,ko01100,ko04075	0.800828	6.52365e-05	3
Cluster-129859.2	11.5407	up	--	--	IAA	2.16008	up	Indole-3-acetic acid	C00954	ko00380,ko01100,ko04075	0.908253	1.88686e-07	3
Cluster-129859.3	1.47695	up	--	--	IAA	2.16008	up	Indole-3-acetic acid	C00954	ko00380,ko01100,ko04075	0.83304	1.77254e-05	3
Cluster-129859.4	2.73063	up	--	--	IAA	2.16008	up	Indole-3-acetic acid	C00954	ko00380,ko01100,ko04075	0.884761	1.08304e-06	3
Cluster-129865.0	7.98113	up	--	--	IAA	2.16008	up	Indole-3-acetic acid	C00954	ko00380,ko01100,ko04075	0.837542	1.4459e-05	3
Cluster-12987.18	7.67164	up	--	--	IAA	2.16008	up	Indole-3-acetic acid	C00954	ko00380,ko01100,ko04075	0.810356	4.5515e-05	3
Cluster-129909.53	9.95391	up	--	--	IAA	2.16008	up	Indole-3-acetic acid	C00954	ko00380,ko01100,ko04075	0.878345	1.63598e-06	3
Cluster-130153.1	1.74448	up	--	--	IAA	2.16008	up	Indole-3-acetic acid	C00954	ko00380,ko01100,ko04075	0.889392	7.91969e-07	3
Cluster-130170.0	2.51088	up	--	--	IAA	2.16008	up	Indole-3-acetic acid	C00954	ko00380,ko01100,ko04075	0.838572	1.37889e-05	3
Cluster-130170.1	5.5194	up	--	--	IAA	2.16008	up	Indole-3-acetic acid	C00954	ko00380,ko01100,ko04075	0.900107	3.62919e-07	3
Cluster-130170.3	4.93773	up	--	--	IAA	2.16008	up	Indole-3-acetic acid	C00954	ko00380,ko01100,ko04075	0.903032	2.88847e-07	3
Cluster-130186.0	3.46302	up	--	--	IAA	2.16008	up	Indole-3-acetic acid	C00954	ko00380,ko01100,ko04075	0.901342	3.29862e-07	3
Cluster-130198.1	7.31274	up	--	--	IAA	2.16008	up	Indole-3-acetic acid	C00954	ko00380,ko01100,ko04075	0.823996	2.62262e-05	3
Cluster-130241.3	2.94686	up	K18482	ko00790,ko01240	IAA	2.16008	up	Indole-3-acetic acid	C00954	ko00380,ko01100,ko04075	0.804235	5.74846e-05	3
Cluster-130249.4	8.81076	up	K13800	ko00240,ko01100,ko01232,ko01240	IAA	2.16008	up	Indole-3-acetic acid	C00954	ko00380,ko01100,ko04075	0.815334	3.74129e-05	3
Cluster-130295.5	12.9017	up	K19355	ko00051,ko01100	IAA	2.16008	up	Indole-3-acetic acid	C00954	ko00380,ko01100,ko04075	0.888662	8.3274e-07	3
Cluster-130295.6	12.2652	up	K19355	ko00051,ko01100	IAA	2.16008	up	Indole-3-acetic acid	C00954	ko00380,ko01100,ko04075	0.876791	1.80158e-06	3
Cluster-130329.1	4.74466	up	K01051	ko00040,ko01100	IAA	2.16008	up	Indole-3-acetic acid	C00954	ko00380,ko01100,ko04075	0.883352	1.1881e-06	3
Cluster-130329.3	2.38139	up	K01051	ko00040,ko01100	IAA	2.16008	up	Indole-3-acetic acid	C00954	ko00380,ko01100,ko04075	0.824672	2.54887e-05	3
Cluster-130329.4	3.06838	up	K01051	ko00040,ko01100	IAA	2.16008	up	Indole-3-acetic acid	C00954	ko00380,ko01100,ko04075	0.841318	1.21311e-05	3
Cluster-130381.2	2.45164	up	--	--	IAA	2.16008	up	Indole-3-acetic acid	C00954	ko00380,ko01100,ko04075	0.834391	1.66846e-05	3
Cluster-130388.0	5.06975	up	--	--	IAA	2.16008	up	Indole-3-acetic acid	C00954	ko00380,ko01100,ko04075	0.947255	2.55132e-09	3
Cluster-130396.0	11.0065	up	--	--	IAA	2.16008	up	Indole-3-acetic acid	C00954	ko00380,ko01100,ko04075	0.897245	4.5073e-07	3
Cluster-130396.6	2.6718	up	--	--	IAA	2.16008	up	Indole-3-acetic acid	C00954	ko00380,ko01100,ko04075	0.903896	2.69656e-07	3
Cluster-130459.8	2.72355	up	--	--	IAA	2.16008	up	Indole-3-acetic acid	C00954	ko00380,ko01100,ko04075	0.810088	4.59907e-05	3
Cluster-130484.0	3.9357	up	K08913	ko00196,ko01100	IAA	2.16008	up	Indole-3-acetic acid	C00954	ko00380,ko01100,ko04075	0.804841	5.61906e-05	3
Cluster-130484.1	7.21885	up	K08913	ko00196,ko01100	IAA	2.16008	up	Indole-3-acetic acid	C00954	ko00380,ko01100,ko04075	0.849081	8.33349e-06	3
Cluster-130484.4	2.5505	up	K08913	ko00196,ko01100	IAA	2.16008	up	Indole-3-acetic acid	C00954	ko00380,ko01100,ko04075	0.834141	1.68732e-05	3
Cluster-130500.16	1.40256	up	K01922	ko00770,ko01100,ko01240	IAA	2.16008	up	Indole-3-acetic acid	C00954	ko00380,ko01100,ko04075	0.866182	3.36905e-06	3
Cluster-130570.2	4.65969	up	--	--	IAA	2.16008	up	Indole-3-acetic acid	C00954	ko00380,ko01100,ko04075	0.85555	5.99656e-06	3
Cluster-130570.5	5.8745	up	--	--	IAA	2.16008	up	Indole-3-acetic acid	C00954	ko00380,ko01100,ko04075	0.808303	4.92684e-05	3
Cluster-130653.4	11.2846	up	K02693	ko00195,ko01100	IAA	2.16008	up	Indole-3-acetic acid	C00954	ko00380,ko01100,ko04075	0.865157	3.56908e-06	3
Cluster-130707.3	3.70585	up	--	--	IAA	2.16008	up	Indole-3-acetic acid	C00954	ko00380,ko01100,ko04075	0.844139	1.06084e-05	3
Cluster-130719.0	1.7464	up	K02684	ko03030	IAA	2.16008	up	Indole-3-acetic acid	C00954	ko00380,ko01100,ko04075	0.864881	3.62468e-06	3
Cluster-130819.7	4.22872	up	K15397	ko00062,ko01100,ko01110,ko04626	IAA	2.16008	up	Indole-3-acetic acid	C00954	ko00380,ko01100,ko04075	0.821893	2.86382e-05	3
Cluster-130840.0	2.70073	up	--	--	IAA	2.16008	up	Indole-3-acetic acid	C00954	ko00380,ko01100,ko04075	0.860667	4.57013e-06	3
Cluster-130880.0	2.33511	up	K12930	ko00942,ko01100,ko01110	IAA	2.16008	up	Indole-3-acetic acid	C00954	ko00380,ko01100,ko04075	0.810496	4.5269e-05	3
Cluster-130917.27	8.23704	up	K12309	ko00052,ko00511,ko00531,ko00600,ko00604,ko01100	IAA	2.16008	up	Indole-3-acetic acid	C00954	ko00380,ko01100,ko04075	0.886879	9.40108e-07	3
Cluster-130989.1	1.51386	up	K20884	ko00740,ko01100,ko01110,ko01240	IAA	2.16008	up	Indole-3-acetic acid	C00954	ko00380,ko01100,ko04075	0.816694	3.54263e-05	3
Cluster-130996.12	3.67648	up	--	--	IAA	2.16008	up	Indole-3-acetic acid	C00954	ko00380,ko01100,ko04075	0.811368	4.37576e-05	3
Cluster-13103.5	7.89104	up	K00895	ko00010,ko00030,ko00051,ko01100,ko01110	IAA	2.16008	up	Indole-3-acetic acid	C00954	ko00380,ko01100,ko04075	0.833945	1.70225e-05	3
Cluster-131034.0	1.58931	up	--	--	IAA	2.16008	up	Indole-3-acetic acid	C00954	ko00380,ko01100,ko04075	0.834281	1.67679e-05	3
Cluster-131069.1	9.09286	up	--	--	IAA	2.16008	up	Indole-3-acetic acid	C00954	ko00380,ko01100,ko04075	0.84604	9.67709e-06	3
Cluster-131108.2	10.7834	up	--	--	IAA	2.16008	up	Indole-3-acetic acid	C00954	ko00380,ko01100,ko04075	0.823678	2.65793e-05	3
Cluster-131109.6	11.0294	up	--	--	IAA	2.16008	up	Indole-3-acetic acid	C00954	ko00380,ko01100,ko04075	0.852325	7.07932e-06	3
Cluster-131180.0	8.12108	up	--	--	IAA	2.16008	up	Indole-3-acetic acid	C00954	ko00380,ko01100,ko04075	0.804486	5.69466e-05	3
Cluster-131180.4	8.90933	up	--	--	IAA	2.16008	up	Indole-3-acetic acid	C00954	ko00380,ko01100,ko04075	0.800898	6.50703e-05	3
Cluster-131184.4	8.21769	up	--	--	IAA	2.16008	up	Indole-3-acetic acid	C00954	ko00380,ko01100,ko04075	0.831668	1.88381e-05	3
Cluster-131218.0	9.45337	up	--	--	IAA	2.16008	up	Indole-3-acetic acid	C00954	ko00380,ko01100,ko04075	0.826687	2.33952e-05	3
Cluster-131218.2	7.66427	up	--	--	IAA	2.16008	up	Indole-3-acetic acid	C00954	ko00380,ko01100,ko04075	0.812979	4.10774e-05	3
Cluster-131218.9	11.0604	up	--	--	IAA	2.16008	up	Indole-3-acetic acid	C00954	ko00380,ko01100,ko04075	0.839732	1.30663e-05	3
Cluster-131256.8	10.7307	up	--	--	IAA	2.16008	up	Indole-3-acetic acid	C00954	ko00380,ko01100,ko04075	0.876541	1.82956e-06	3
Cluster-131258.1	12.1661	up	K01051	ko00040,ko01100	IAA	2.16008	up	Indole-3-acetic acid	C00954	ko00380,ko01100,ko04075	0.906422	2.19687e-07	3
Cluster-131258.6	12.4117	up	K01051	ko00040,ko01100	IAA	2.16008	up	Indole-3-acetic acid	C00954	ko00380,ko01100,ko04075	0.901667	3.21608e-07	3
Cluster-131348.3	2.82129	up	K13415	ko04075	IAA	2.16008	up	Indole-3-acetic acid	C00954	ko00380,ko01100,ko04075	0.875894	1.90364e-06	3
Cluster-131395.2	8.35189	up	--	--	IAA	2.16008	up	Indole-3-acetic acid	C00954	ko00380,ko01100,ko04075	0.845306	1.00279e-05	3
Cluster-131451.2	12.227	up	--	--	IAA	2.16008	up	Indole-3-acetic acid	C00954	ko00380,ko01100,ko04075	0.882471	1.2582e-06	3
Cluster-131460.12	4.39489	up	--	--	IAA	2.16008	up	Indole-3-acetic acid	C00954	ko00380,ko01100,ko04075	0.861036	4.4797e-06	3
Cluster-131461.0	5.90716	up	--	--	IAA	2.16008	up	Indole-3-acetic acid	C00954	ko00380,ko01100,ko04075	0.832054	1.85195e-05	3
Cluster-131461.1	8.76136	up	--	--	IAA	2.16008	up	Indole-3-acetic acid	C00954	ko00380,ko01100,ko04075	0.872696	2.30897e-06	3
Cluster-131588.1	5.06164	up	--	--	IAA	2.16008	up	Indole-3-acetic acid	C00954	ko00380,ko01100,ko04075	0.854277	6.40569e-06	3
Cluster-131623.1	7.59059	up	--	--	IAA	2.16008	up	Indole-3-acetic acid	C00954	ko00380,ko01100,ko04075	0.896761	4.67263e-07	3
Cluster-131630.6	8.10294	up	--	--	IAA	2.16008	up	Indole-3-acetic acid	C00954	ko00380,ko01100,ko04075	0.903602	2.76064e-07	3
Cluster-131630.8	8.86949	up	--	--	IAA	2.16008	up	Indole-3-acetic acid	C00954	ko00380,ko01100,ko04075	0.857729	5.34829e-06	3
Cluster-131656.0	4.51093	up	--	--	IAA	2.16008	up	Indole-3-acetic acid	C00954	ko00380,ko01100,ko04075	0.849879	8.00853e-06	3
Cluster-131656.5	5.12766	up	--	--	IAA	2.16008	up	Indole-3-acetic acid	C00954	ko00380,ko01100,ko04075	0.815828	3.66801e-05	3
Cluster-131660.4	10.0332	up	K03405	ko00860,ko01100,ko01110	IAA	2.16008	up	Indole-3-acetic acid	C00954	ko00380,ko01100,ko04075	0.840933	1.23525e-05	3
Cluster-131676.7	4.7148	up	K01179	ko00500,ko01100	IAA	2.16008	up	Indole-3-acetic acid	C00954	ko00380,ko01100,ko04075	0.838322	1.39491e-05	3
Cluster-131686.2	9.4894	up	K03943	ko00190,ko01100	IAA	2.16008	up	Indole-3-acetic acid	C00954	ko00380,ko01100,ko04075	0.864165	3.77231e-06	3
Cluster-131686.7	10.7774	up	K03943	ko00190,ko01100	IAA	2.16008	up	Indole-3-acetic acid	C00954	ko00380,ko01100,ko04075	0.825511	2.45983e-05	3
Cluster-131801.4	7.45736	up	K04035	ko00860,ko01100,ko01110	IAA	2.16008	up	Indole-3-acetic acid	C00954	ko00380,ko01100,ko04075	0.835312	1.60059e-05	3
Cluster-131801.5	4.71443	up	K04035	ko00860,ko01100,ko01110	IAA	2.16008	up	Indole-3-acetic acid	C00954	ko00380,ko01100,ko04075	0.887321	9.12472e-07	3
Cluster-131801.6	8.69688	up	K04035	ko00860,ko01100,ko01110	IAA	2.16008	up	Indole-3-acetic acid	C00954	ko00380,ko01100,ko04075	0.8578	5.3284e-06	3
Cluster-131867.13	7.92546	up	--	--	IAA	2.16008	up	Indole-3-acetic acid	C00954	ko00380,ko01100,ko04075	0.806049	5.36875e-05	3
Cluster-131878.10	1.88119	up	K01246	ko03410	IAA	2.16008	up	Indole-3-acetic acid	C00954	ko00380,ko01100,ko04075	0.82157	2.90241e-05	3
Cluster-131881.0	4.6952	up	--	--	IAA	2.16008	up	Indole-3-acetic acid	C00954	ko00380,ko01100,ko04075	0.803761	5.85135e-05	3
Cluster-131885.1	6.82378	up	--	--	IAA	2.16008	up	Indole-3-acetic acid	C00954	ko00380,ko01100,ko04075	0.843469	1.09541e-05	3
Cluster-131972.0	3.68249	up	--	--	IAA	2.16008	up	Indole-3-acetic acid	C00954	ko00380,ko01100,ko04075	0.864205	3.76383e-06	3
Cluster-131973.2	1.07921	up	--	--	IAA	2.16008	up	Indole-3-acetic acid	C00954	ko00380,ko01100,ko04075	0.849258	8.26031e-06	3
Cluster-131994.0	4.83407	up	K03860	ko00563,ko01100	IAA	2.16008	up	Indole-3-acetic acid	C00954	ko00380,ko01100,ko04075	0.800825	6.52441e-05	3
Cluster-131995.4	5.78987	up	--	--	IAA	2.16008	up	Indole-3-acetic acid	C00954	ko00380,ko01100,ko04075	0.854667	6.27775e-06	3
Cluster-131995.5	12.0022	up	--	--	IAA	2.16008	up	Indole-3-acetic acid	C00954	ko00380,ko01100,ko04075	0.859049	4.98588e-06	3
Cluster-13206.18	8.77502	up	--	--	IAA	2.16008	up	Indole-3-acetic acid	C00954	ko00380,ko01100,ko04075	0.837318	1.46087e-05	3
Cluster-13206.27	8.9148	up	--	--	IAA	2.16008	up	Indole-3-acetic acid	C00954	ko00380,ko01100,ko04075	0.808801	4.83346e-05	3
Cluster-132082.4	3.04674	up	K02996	ko03010	IAA	2.16008	up	Indole-3-acetic acid	C00954	ko00380,ko01100,ko04075	0.852557	6.99609e-06	3
Cluster-132082.7	8.2727	up	K02996	ko03010	IAA	2.16008	up	Indole-3-acetic acid	C00954	ko00380,ko01100,ko04075	0.833447	1.74061e-05	3
Cluster-132094.4	9.46296	up	--	--	IAA	2.16008	up	Indole-3-acetic acid	C00954	ko00380,ko01100,ko04075	0.842992	1.12063e-05	3
Cluster-132126.8	7.8107	up	K14488	ko04075	IAA	2.16008	up	Indole-3-acetic acid	C00954	ko00380,ko01100,ko04075	0.902134	3.10058e-07	3
Cluster-132129.2	1.34156	up	--	--	IAA	2.16008	up	Indole-3-acetic acid	C00954	ko00380,ko01100,ko04075	0.810673	4.49577e-05	3
Cluster-132131.3	4.30522	up	--	--	IAA	2.16008	up	Indole-3-acetic acid	C00954	ko00380,ko01100,ko04075	0.876344	1.85187e-06	3
Cluster-132158.4	1.76992	up	--	--	IAA	2.16008	up	Indole-3-acetic acid	C00954	ko00380,ko01100,ko04075	0.811106	4.42072e-05	3
Cluster-132158.8	1.59348	up	--	--	IAA	2.16008	up	Indole-3-acetic acid	C00954	ko00380,ko01100,ko04075	0.820128	3.0805e-05	3
Cluster-132228.11	4.25305	up	--	--	IAA	2.16008	up	Indole-3-acetic acid	C00954	ko00380,ko01100,ko04075	0.829312	2.08883e-05	3
Cluster-132228.5	7.91179	up	--	--	IAA	2.16008	up	Indole-3-acetic acid	C00954	ko00380,ko01100,ko04075	0.824339	2.58497e-05	3
Cluster-132228.7	1.82403	up	--	--	IAA	2.16008	up	Indole-3-acetic acid	C00954	ko00380,ko01100,ko04075	0.816011	3.64123e-05	3
Cluster-132262.2	9.54233	up	--	--	IAA	2.16008	up	Indole-3-acetic acid	C00954	ko00380,ko01100,ko04075	0.84695	9.25702e-06	3
Cluster-132262.4	3.76111	up	--	--	IAA	2.16008	up	Indole-3-acetic acid	C00954	ko00380,ko01100,ko04075	0.903852	2.70598e-07	3
Cluster-132262.6	10.5931	up	--	--	IAA	2.16008	up	Indole-3-acetic acid	C00954	ko00380,ko01100,ko04075	0.875798	1.91482e-06	3
Cluster-132299.0	3.13203	up	--	--	IAA	2.16008	up	Indole-3-acetic acid	C00954	ko00380,ko01100,ko04075	0.856653	5.66046e-06	3
Cluster-132349.0	4.6567	up	--	--	IAA	2.16008	up	Indole-3-acetic acid	C00954	ko00380,ko01100,ko04075	0.852341	7.07362e-06	3
Cluster-132371.1	10.4429	up	--	--	IAA	2.16008	up	Indole-3-acetic acid	C00954	ko00380,ko01100,ko04075	0.827885	2.22212e-05	3
Cluster-132428.2	10.6061	up	K04077	ko03018	IAA	2.16008	up	Indole-3-acetic acid	C00954	ko00380,ko01100,ko04075	0.853728	6.58913e-06	3
Cluster-132436.2	3.89632	up	--	--	IAA	2.16008	up	Indole-3-acetic acid	C00954	ko00380,ko01100,ko04075	0.871099	2.53791e-06	3
Cluster-132436.8	10.8556	up	--	--	IAA	2.16008	up	Indole-3-acetic acid	C00954	ko00380,ko01100,ko04075	0.878769	1.59313e-06	3
Cluster-132482.3	8.127	up	K13065	ko00940,ko00941,ko00945,ko01100,ko01110	IAA	2.16008	up	Indole-3-acetic acid	C00954	ko00380,ko01100,ko04075	0.879855	1.48777e-06	3
Cluster-132490.0	10.9184	up	K00966	ko00051,ko00520,ko01100,ko01110,ko01240,ko01250	IAA	2.16008	up	Indole-3-acetic acid	C00954	ko00380,ko01100,ko04075	0.857129	5.52071e-06	3
Cluster-132490.1	9.61014	up	K00966	ko00051,ko00520,ko01100,ko01110,ko01240,ko01250	IAA	2.16008	up	Indole-3-acetic acid	C00954	ko00380,ko01100,ko04075	0.831758	1.87632e-05	3
Cluster-132490.3	1.70639	up	K00966	ko00051,ko00520,ko01100,ko01110,ko01240,ko01250	IAA	2.16008	up	Indole-3-acetic acid	C00954	ko00380,ko01100,ko04075	0.861862	4.28264e-06	3
Cluster-132490.4	9.41439	up	K00966	ko00051,ko00520,ko01100,ko01110,ko01240,ko01250	IAA	2.16008	up	Indole-3-acetic acid	C00954	ko00380,ko01100,ko04075	0.892638	6.30679e-07	3
Cluster-132516.1	2.43801	up	K01193	ko00052,ko00500,ko01100,ko01110	IAA	2.16008	up	Indole-3-acetic acid	C00954	ko00380,ko01100,ko04075	0.80816	4.95387e-05	3
Cluster-132619.0	10.7804	up	K08343	ko04136	IAA	2.16008	up	Indole-3-acetic acid	C00954	ko00380,ko01100,ko04075	0.815785	3.67441e-05	3
Cluster-132641.6	8.69492	up	--	--	IAA	2.16008	up	Indole-3-acetic acid	C00954	ko00380,ko01100,ko04075	0.806127	5.35289e-05	3
Cluster-132649.0	3.32848	up	K01100	ko00710,ko01100,ko01200	IAA	2.16008	up	Indole-3-acetic acid	C00954	ko00380,ko01100,ko04075	0.849793	8.04289e-06	3
Cluster-132658.0	11.6638	up	K15404	ko00073,ko01110	IAA	2.16008	up	Indole-3-acetic acid	C00954	ko00380,ko01100,ko04075	0.882247	1.27659e-06	3
Cluster-132658.3	11.3219	up	K15404	ko00073,ko01110	IAA	2.16008	up	Indole-3-acetic acid	C00954	ko00380,ko01100,ko04075	0.882697	1.2399e-06	3
Cluster-132658.6	9.70968	up	K15404	ko00073,ko01110	IAA	2.16008	up	Indole-3-acetic acid	C00954	ko00380,ko01100,ko04075	0.84884	8.43358e-06	3
Cluster-132666.8	2.30481	up	K04125	ko00904,ko01110	IAA	2.16008	up	Indole-3-acetic acid	C00954	ko00380,ko01100,ko04075	0.807754	5.03152e-05	3
Cluster-132685.9	2.16034	up	--	--	IAA	2.16008	up	Indole-3-acetic acid	C00954	ko00380,ko01100,ko04075	0.82692	2.31624e-05	3
Cluster-132717.1	3.58984	up	--	--	IAA	2.16008	up	Indole-3-acetic acid	C00954	ko00380,ko01100,ko04075	0.870717	2.59545e-06	3
Cluster-132717.3	4.30525	up	--	--	IAA	2.16008	up	Indole-3-acetic acid	C00954	ko00380,ko01100,ko04075	0.838856	1.36092e-05	3
Cluster-132717.4	11.0783	up	--	--	IAA	2.16008	up	Indole-3-acetic acid	C00954	ko00380,ko01100,ko04075	0.830691	1.96668e-05	3
Cluster-132775.0	3.58792	up	--	--	IAA	2.16008	up	Indole-3-acetic acid	C00954	ko00380,ko01100,ko04075	0.834784	1.63921e-05	3
Cluster-132786.3	8.02169	up	K00679	ko00561,ko01100	IAA	2.16008	up	Indole-3-acetic acid	C00954	ko00380,ko01100,ko04075	0.853683	6.60452e-06	3
Cluster-132789.2	6.17546	up	--	--	IAA	2.16008	up	Indole-3-acetic acid	C00954	ko00380,ko01100,ko04075	0.803609	5.88472e-05	3
Cluster-132810.4	7.86762	up	K08909	ko00196,ko01100	IAA	2.16008	up	Indole-3-acetic acid	C00954	ko00380,ko01100,ko04075	0.80028	6.6563e-05	3
Cluster-132810.5	2.37756	up	K08909	ko00196,ko01100	IAA	2.16008	up	Indole-3-acetic acid	C00954	ko00380,ko01100,ko04075	0.856474	5.71403e-06	3
Cluster-132817.0	11.9721	up	K23260	ko00999,ko01110	IAA	2.16008	up	Indole-3-acetic acid	C00954	ko00380,ko01100,ko04075	0.872121	2.38932e-06	3
Cluster-132825.1	8.97484	up	--	--	IAA	2.16008	up	Indole-3-acetic acid	C00954	ko00380,ko01100,ko04075	0.904638	2.54039e-07	3
Cluster-132827.14	7.53456	up	--	--	IAA	2.16008	up	Indole-3-acetic acid	C00954	ko00380,ko01100,ko04075	0.805196	5.5445e-05	3
Cluster-132827.7	11.1111	up	--	--	IAA	2.16008	up	Indole-3-acetic acid	C00954	ko00380,ko01100,ko04075	0.852146	7.14398e-06	3
Cluster-132840.2	8.93093	up	K22596	ko00480,ko01100	IAA	2.16008	up	Indole-3-acetic acid	C00954	ko00380,ko01100,ko04075	0.853743	6.58436e-06	3
Cluster-132842.0	4.57978	up	--	--	IAA	2.16008	up	Indole-3-acetic acid	C00954	ko00380,ko01100,ko04075	0.883097	1.20805e-06	3
Cluster-132842.1	2.56869	up	--	--	IAA	2.16008	up	Indole-3-acetic acid	C00954	ko00380,ko01100,ko04075	0.869154	2.84272e-06	3
Cluster-132847.0	8.54658	up	--	--	IAA	2.16008	up	Indole-3-acetic acid	C00954	ko00380,ko01100,ko04075	0.90543	2.38254e-07	3
Cluster-132847.4	3.72754	up	--	--	IAA	2.16008	up	Indole-3-acetic acid	C00954	ko00380,ko01100,ko04075	0.905505	2.36809e-07	3
Cluster-132857.4	10.4878	up	--	--	IAA	2.16008	up	Indole-3-acetic acid	C00954	ko00380,ko01100,ko04075	0.857778	5.33464e-06	3
Cluster-132857.5	10.723	up	--	--	IAA	2.16008	up	Indole-3-acetic acid	C00954	ko00380,ko01100,ko04075	0.846805	9.32253e-06	3
Cluster-132857.6	3.94984	insig	--	--	IAA	2.16008	up	Indole-3-acetic acid	C00954	ko00380,ko01100,ko04075	0.848379	8.6282e-06	3
Cluster-132857.9	7.56654	up	--	--	IAA	2.16008	up	Indole-3-acetic acid	C00954	ko00380,ko01100,ko04075	0.878088	1.66246e-06	3
Cluster-132859.3	9.20937	up	--	--	IAA	2.16008	up	Indole-3-acetic acid	C00954	ko00380,ko01100,ko04075	0.847452	9.03155e-06	3
Cluster-132895.6	1.15695	up	--	--	IAA	2.16008	up	Indole-3-acetic acid	C00954	ko00380,ko01100,ko04075	0.871149	2.5304e-06	3
Cluster-132910.0	2.00891	up	--	--	IAA	2.16008	up	Indole-3-acetic acid	C00954	ko00380,ko01100,ko04075	0.840274	1.274e-05	3
Cluster-132910.1	1.85363	up	--	--	IAA	2.16008	up	Indole-3-acetic acid	C00954	ko00380,ko01100,ko04075	0.826413	2.36711e-05	3
Cluster-132981.5	11.7962	up	--	--	IAA	2.16008	up	Indole-3-acetic acid	C00954	ko00380,ko01100,ko04075	0.891419	6.87558e-07	3
Cluster-132996.18	8.85643	up	--	--	IAA	2.16008	up	Indole-3-acetic acid	C00954	ko00380,ko01100,ko04075	0.870179	2.67826e-06	3
Cluster-133028.0	2.62913	up	--	--	IAA	2.16008	up	Indole-3-acetic acid	C00954	ko00380,ko01100,ko04075	0.841292	1.21457e-05	3
Cluster-133029.4	5.29072	up	K14505	ko04075	IAA	2.16008	up	Indole-3-acetic acid	C00954	ko00380,ko01100,ko04075	0.846047	9.67384e-06	3
Cluster-133029.6	8.79854	up	K14505	ko04075	IAA	2.16008	up	Indole-3-acetic acid	C00954	ko00380,ko01100,ko04075	0.897088	4.56025e-07	3
Cluster-133060.4	4.62515	up	--	--	IAA	2.16008	up	Indole-3-acetic acid	C00954	ko00380,ko01100,ko04075	0.861507	4.3665e-06	3
Cluster-133063.5	12.766	up	--	--	IAA	2.16008	up	Indole-3-acetic acid	C00954	ko00380,ko01100,ko04075	0.884187	1.12487e-06	3
Cluster-133088.3	9.14708	up	--	--	IAA	2.16008	up	Indole-3-acetic acid	C00954	ko00380,ko01100,ko04075	0.847359	9.07307e-06	3
Cluster-133097.0	6.18557	up	K02541	ko03030	IAA	2.16008	up	Indole-3-acetic acid	C00954	ko00380,ko01100,ko04075	0.907745	1.96875e-07	3
Cluster-133250.1	7.59235	up	--	--	IAA	2.16008	up	Indole-3-acetic acid	C00954	ko00380,ko01100,ko04075	0.873292	2.22827e-06	3
Cluster-133281.1	1.27942	up	--	--	IAA	2.16008	up	Indole-3-acetic acid	C00954	ko00380,ko01100,ko04075	0.86293	4.03904e-06	3
Cluster-133312.0	9.91552	up	--	--	IAA	2.16008	up	Indole-3-acetic acid	C00954	ko00380,ko01100,ko04075	0.846349	9.5327e-06	3
Cluster-133322.0	9.51571	up	--	--	IAA	2.16008	up	Indole-3-acetic acid	C00954	ko00380,ko01100,ko04075	0.887664	8.91494e-07	3
Cluster-133322.7	6.94095	up	--	--	IAA	2.16008	up	Indole-3-acetic acid	C00954	ko00380,ko01100,ko04075	0.851586	7.34982e-06	3
Cluster-133357.7	11.0036	up	K20728	ko04016	IAA	2.16008	up	Indole-3-acetic acid	C00954	ko00380,ko01100,ko04075	0.831459	1.90126e-05	3
Cluster-133357.9	6.10262	up	K20728	ko04016	IAA	2.16008	up	Indole-3-acetic acid	C00954	ko00380,ko01100,ko04075	0.834333	1.67287e-05	3
Cluster-133400.12	7.98051	up	--	--	IAA	2.16008	up	Indole-3-acetic acid	C00954	ko00380,ko01100,ko04075	0.871598	2.46432e-06	3
Cluster-133445.0	6.22885	up	--	--	IAA	2.16008	up	Indole-3-acetic acid	C00954	ko00380,ko01100,ko04075	0.80699	5.18029e-05	3
Cluster-133445.1	7.72326	up	--	--	IAA	2.16008	up	Indole-3-acetic acid	C00954	ko00380,ko01100,ko04075	0.885808	1.01019e-06	3
Cluster-133473.2	10.0524	up	--	--	IAA	2.16008	up	Indole-3-acetic acid	C00954	ko00380,ko01100,ko04075	0.848103	8.74678e-06	3
Cluster-133552.0	11.3126	up	--	--	IAA	2.16008	up	Indole-3-acetic acid	C00954	ko00380,ko01100,ko04075	0.841031	1.2296e-05	3
Cluster-133653.0	5.00061	up	--	--	IAA	2.16008	up	Indole-3-acetic acid	C00954	ko00380,ko01100,ko04075	0.809898	4.63316e-05	3
Cluster-133814.2	11.3746	up	--	--	IAA	2.16008	up	Indole-3-acetic acid	C00954	ko00380,ko01100,ko04075	0.90928	1.72998e-07	3
Cluster-133823.0	3.86653	up	--	--	IAA	2.16008	up	Indole-3-acetic acid	C00954	ko00380,ko01100,ko04075	0.899257	3.87309e-07	3
Cluster-133823.2	1.50651	up	--	--	IAA	2.16008	up	Indole-3-acetic acid	C00954	ko00380,ko01100,ko04075	0.805077	5.56951e-05	3
Cluster-133823.5	1.36295	up	--	--	IAA	2.16008	up	Indole-3-acetic acid	C00954	ko00380,ko01100,ko04075	0.876797	1.80092e-06	3
Cluster-133823.8	2.23906	up	--	--	IAA	2.16008	up	Indole-3-acetic acid	C00954	ko00380,ko01100,ko04075	0.870953	2.55966e-06	3
Cluster-133866.5	1.05716	up	--	--	IAA	2.16008	up	Indole-3-acetic acid	C00954	ko00380,ko01100,ko04075	0.805494	5.48253e-05	3
Cluster-133868.0	7.53334	up	--	--	IAA	2.16008	up	Indole-3-acetic acid	C00954	ko00380,ko01100,ko04075	0.826932	2.31506e-05	3
Cluster-133945.18	9.23254	up	K07466	ko03030,ko03420,ko03430,ko03440	IAA	2.16008	up	Indole-3-acetic acid	C00954	ko00380,ko01100,ko04075	0.856573	5.68431e-06	3
Cluster-133958.1	8.7365	up	--	--	IAA	2.16008	up	Indole-3-acetic acid	C00954	ko00380,ko01100,ko04075	0.825666	2.44366e-05	3
Cluster-133970.10	3.82417	up	--	--	IAA	2.16008	up	Indole-3-acetic acid	C00954	ko00380,ko01100,ko04075	0.851169	7.50632e-06	3
Cluster-133970.5	8.08057	up	--	--	IAA	2.16008	up	Indole-3-acetic acid	C00954	ko00380,ko01100,ko04075	0.856191	5.79929e-06	3
Cluster-133985.1	8.14138	up	--	--	IAA	2.16008	up	Indole-3-acetic acid	C00954	ko00380,ko01100,ko04075	0.880126	1.46237e-06	3
Cluster-134089.1	11.2309	up	K00679	ko00561,ko01100	IAA	2.16008	up	Indole-3-acetic acid	C00954	ko00380,ko01100,ko04075	0.905242	2.41918e-07	3
Cluster-134092.1	3.49663	up	--	--	IAA	2.16008	up	Indole-3-acetic acid	C00954	ko00380,ko01100,ko04075	0.849324	8.23312e-06	3
Cluster-134104.4	7.79938	up	--	--	IAA	2.16008	up	Indole-3-acetic acid	C00954	ko00380,ko01100,ko04075	0.836998	1.4824e-05	3
Cluster-13418.0	7.32813	up	--	--	IAA	2.16008	up	Indole-3-acetic acid	C00954	ko00380,ko01100,ko04075	0.81506	3.7825e-05	3
Cluster-134193.0	7.60437	up	--	--	IAA	2.16008	up	Indole-3-acetic acid	C00954	ko00380,ko01100,ko04075	0.829049	2.11289e-05	3
Cluster-134194.0	3.95358	up	K07466	ko03030,ko03420,ko03430,ko03440	IAA	2.16008	up	Indole-3-acetic acid	C00954	ko00380,ko01100,ko04075	0.892523	6.35836e-07	3
Cluster-134194.3	2.53693	up	K07466	ko03030,ko03420,ko03430,ko03440	IAA	2.16008	up	Indole-3-acetic acid	C00954	ko00380,ko01100,ko04075	0.876161	1.8728e-06	3
Cluster-134221.0	5.66025	up	K08910	ko00196,ko01100	IAA	2.16008	up	Indole-3-acetic acid	C00954	ko00380,ko01100,ko04075	0.875664	1.93066e-06	3
Cluster-134240.1	1.82988	up	K10140	ko03420,ko04120	IAA	2.16008	up	Indole-3-acetic acid	C00954	ko00380,ko01100,ko04075	0.859207	4.94375e-06	3
Cluster-134240.2	2.00317	up	K10140	ko03420,ko04120	IAA	2.16008	up	Indole-3-acetic acid	C00954	ko00380,ko01100,ko04075	0.879072	1.56307e-06	3
Cluster-134280.3	11.0384	up	K01738	ko00270,ko00920,ko01100,ko01110,ko01200,ko01230	IAA	2.16008	up	Indole-3-acetic acid	C00954	ko00380,ko01100,ko04075	0.859132	4.96361e-06	3
Cluster-13434.15	7.64626	up	K01206	ko00511	IAA	2.16008	up	Indole-3-acetic acid	C00954	ko00380,ko01100,ko04075	0.803248	5.96458e-05	3
Cluster-13434.16	6.9041	up	--	--	IAA	2.16008	up	Indole-3-acetic acid	C00954	ko00380,ko01100,ko04075	0.818633	3.27496e-05	3
Cluster-13434.3	2.24728	up	K01206	ko00511	IAA	2.16008	up	Indole-3-acetic acid	C00954	ko00380,ko01100,ko04075	0.881981	1.29868e-06	3
Cluster-134356.10	14.4198	up	K01674	ko00910,ko01100	IAA	2.16008	up	Indole-3-acetic acid	C00954	ko00380,ko01100,ko04075	0.890928	7.11689e-07	3
Cluster-134448.1	9.50847	up	--	--	IAA	2.16008	up	Indole-3-acetic acid	C00954	ko00380,ko01100,ko04075	0.837911	1.42161e-05	3
Cluster-134453.0	6.11387	up	--	--	IAA	2.16008	up	Indole-3-acetic acid	C00954	ko00380,ko01100,ko04075	0.887781	8.84428e-07	3
Cluster-134464.2	2.18092	up	--	--	IAA	2.16008	up	Indole-3-acetic acid	C00954	ko00380,ko01100,ko04075	0.802804	6.06399e-05	3
Cluster-134589.1	3.17374	up	--	--	IAA	2.16008	up	Indole-3-acetic acid	C00954	ko00380,ko01100,ko04075	0.903508	2.78133e-07	3
Cluster-134589.3	3.11448	up	--	--	IAA	2.16008	up	Indole-3-acetic acid	C00954	ko00380,ko01100,ko04075	0.88955	7.83357e-07	3
Cluster-134627.1	2.84655	up	K10756	ko03030,ko03420,ko03430	IAA	2.16008	up	Indole-3-acetic acid	C00954	ko00380,ko01100,ko04075	0.814478	3.87116e-05	3
Cluster-134685.3	2.27786	up	--	--	IAA	2.16008	up	Indole-3-acetic acid	C00954	ko00380,ko01100,ko04075	0.902711	2.96287e-07	3
Cluster-134709.1	3.89012	up	--	--	IAA	2.16008	up	Indole-3-acetic acid	C00954	ko00380,ko01100,ko04075	0.831294	1.91518e-05	3
Cluster-134736.2	12.9592	up	--	--	IAA	2.16008	up	Indole-3-acetic acid	C00954	ko00380,ko01100,ko04075	0.827513	2.25796e-05	3
Cluster-134736.3	6.95851	up	--	--	IAA	2.16008	up	Indole-3-acetic acid	C00954	ko00380,ko01100,ko04075	0.877465	1.7281e-06	3
Cluster-134794.10	9.89242	up	K00799	ko00480,ko01100	IAA	2.16008	up	Indole-3-acetic acid	C00954	ko00380,ko01100,ko04075	0.879498	1.5217e-06	3
Cluster-134883.5	2.21422	up	--	--	IAA	2.16008	up	Indole-3-acetic acid	C00954	ko00380,ko01100,ko04075	0.831946	1.8608e-05	3
Cluster-134897.6	7.87944	up	--	--	IAA	2.16008	up	Indole-3-acetic acid	C00954	ko00380,ko01100,ko04075	0.82619	2.38969e-05	3
Cluster-134937.3	6.81968	up	--	--	IAA	2.16008	up	Indole-3-acetic acid	C00954	ko00380,ko01100,ko04075	0.861557	4.3546e-06	3
Cluster-134953.1	9.30716	up	--	--	IAA	2.16008	up	Indole-3-acetic acid	C00954	ko00380,ko01100,ko04075	0.889991	7.59736e-07	3
Cluster-135051.1	11.4849	up	K00799	ko00480,ko01100	IAA	2.16008	up	Indole-3-acetic acid	C00954	ko00380,ko01100,ko04075	0.856708	5.64413e-06	3
Cluster-135051.4	8.26897	up	K00799	ko00480,ko01100	IAA	2.16008	up	Indole-3-acetic acid	C00954	ko00380,ko01100,ko04075	0.892695	6.28094e-07	3
Cluster-135070.0	1.52594	up	--	--	IAA	2.16008	up	Indole-3-acetic acid	C00954	ko00380,ko01100,ko04075	0.855971	5.86634e-06	3
Cluster-135168.0	2.90725	up	--	--	IAA	2.16008	up	Indole-3-acetic acid	C00954	ko00380,ko01100,ko04075	0.847639	8.94889e-06	3
Cluster-135168.2	2.58502	up	--	--	IAA	2.16008	up	Indole-3-acetic acid	C00954	ko00380,ko01100,ko04075	0.855314	6.07056e-06	3
Cluster-135168.4	2.81914	up	--	--	IAA	2.16008	up	Indole-3-acetic acid	C00954	ko00380,ko01100,ko04075	0.841237	1.2177e-05	3
Cluster-135175.3	7.64474	up	--	--	IAA	2.16008	up	Indole-3-acetic acid	C00954	ko00380,ko01100,ko04075	0.818697	3.26638e-05	3
Cluster-135177.0	4.30093	up	K10703	ko00062,ko01040,ko01100,ko01110,ko01212	IAA	2.16008	up	Indole-3-acetic acid	C00954	ko00380,ko01100,ko04075	0.840108	1.28391e-05	3
Cluster-135185.8	2.62596	up	--	--	IAA	2.16008	up	Indole-3-acetic acid	C00954	ko00380,ko01100,ko04075	0.806187	5.34073e-05	3
Cluster-135238.1	3.78009	up	--	--	IAA	2.16008	up	Indole-3-acetic acid	C00954	ko00380,ko01100,ko04075	0.868526	2.94753e-06	3
Cluster-135238.2	3.30765	up	--	--	IAA	2.16008	up	Indole-3-acetic acid	C00954	ko00380,ko01100,ko04075	0.886705	9.51211e-07	3
Cluster-13527.0	8.79828	up	--	--	IAA	2.16008	up	Indole-3-acetic acid	C00954	ko00380,ko01100,ko04075	0.840837	1.24081e-05	3
Cluster-135274.1	7.40927	up	--	--	IAA	2.16008	up	Indole-3-acetic acid	C00954	ko00380,ko01100,ko04075	0.830726	1.9636e-05	3
Cluster-135327.1	8.9583	up	--	--	IAA	2.16008	up	Indole-3-acetic acid	C00954	ko00380,ko01100,ko04075	0.829496	2.07215e-05	3
Cluster-135418.0	7.24444	up	--	--	IAA	2.16008	up	Indole-3-acetic acid	C00954	ko00380,ko01100,ko04075	0.802193	6.20304e-05	3
Cluster-135427.5	3.1266	up	--	--	IAA	2.16008	up	Indole-3-acetic acid	C00954	ko00380,ko01100,ko04075	0.803754	5.85296e-05	3
Cluster-135432.11	6.03558	up	K13459	ko04626	IAA	2.16008	up	Indole-3-acetic acid	C00954	ko00380,ko01100,ko04075	0.837551	1.44532e-05	3
Cluster-135434.3	3.2899	up	--	--	IAA	2.16008	up	Indole-3-acetic acid	C00954	ko00380,ko01100,ko04075	0.900622	3.48808e-07	3
Cluster-135496.2	14.098	up	--	--	IAA	2.16008	up	Indole-3-acetic acid	C00954	ko00380,ko01100,ko04075	0.859786	4.79255e-06	3
Cluster-13745.0	7.07292	up	--	--	IAA	2.16008	up	Indole-3-acetic acid	C00954	ko00380,ko01100,ko04075	0.88889	8.19796e-07	3
Cluster-13848.3	7.22527	up	K04646	ko04144	IAA	2.16008	up	Indole-3-acetic acid	C00954	ko00380,ko01100,ko04075	0.825856	2.42396e-05	3
Cluster-13862.0	7.99152	up	--	--	IAA	2.16008	up	Indole-3-acetic acid	C00954	ko00380,ko01100,ko04075	0.857207	5.49796e-06	3
Cluster-13873.2	1.65281	up	--	--	IAA	2.16008	up	Indole-3-acetic acid	C00954	ko00380,ko01100,ko04075	0.802583	6.11387e-05	3
Cluster-13873.3	2.10062	up	--	--	IAA	2.16008	up	Indole-3-acetic acid	C00954	ko00380,ko01100,ko04075	0.880634	1.41586e-06	3
Cluster-13873.6	2.31443	up	--	--	IAA	2.16008	up	Indole-3-acetic acid	C00954	ko00380,ko01100,ko04075	0.902102	3.10845e-07	3
Cluster-13873.7	3.4243	up	--	--	IAA	2.16008	up	Indole-3-acetic acid	C00954	ko00380,ko01100,ko04075	0.88474	1.08453e-06	3
Cluster-13944.2	2.92751	up	K20718	ko04016	IAA	2.16008	up	Indole-3-acetic acid	C00954	ko00380,ko01100,ko04075	0.859564	4.85007e-06	3
Cluster-13960.18	4.6926	up	--	--	IAA	2.16008	up	Indole-3-acetic acid	C00954	ko00380,ko01100,ko04075	0.802419	6.15141e-05	3
Cluster-14133.6	1.34378	up	K02916	ko03010	IAA	2.16008	up	Indole-3-acetic acid	C00954	ko00380,ko01100,ko04075	0.801461	6.37323e-05	3
Cluster-14171.142	3.83361	up	K13459	ko04626	IAA	2.16008	up	Indole-3-acetic acid	C00954	ko00380,ko01100,ko04075	0.833971	1.70027e-05	3
Cluster-14171.143	6.87974	up	K13459	ko04626	IAA	2.16008	up	Indole-3-acetic acid	C00954	ko00380,ko01100,ko04075	0.833577	1.73051e-05	3
Cluster-14171.151	7.51694	up	K13459	ko04626	IAA	2.16008	up	Indole-3-acetic acid	C00954	ko00380,ko01100,ko04075	0.834494	1.66077e-05	3
Cluster-14295.0	8.1889	up	--	--	IAA	2.16008	up	Indole-3-acetic acid	C00954	ko00380,ko01100,ko04075	0.825871	2.42247e-05	3
Cluster-14355.16	7.03092	up	--	--	IAA	2.16008	up	Indole-3-acetic acid	C00954	ko00380,ko01100,ko04075	0.801442	6.37788e-05	3
Cluster-14390.19	2.47297	up	--	--	IAA	2.16008	up	Indole-3-acetic acid	C00954	ko00380,ko01100,ko04075	0.826365	2.37194e-05	3
Cluster-14390.42	9.44145	up	K15892	ko00900,ko01110	IAA	2.16008	up	Indole-3-acetic acid	C00954	ko00380,ko01100,ko04075	0.805473	5.48684e-05	3
Cluster-14390.9	6.24659	up	--	--	IAA	2.16008	up	Indole-3-acetic acid	C00954	ko00380,ko01100,ko04075	0.907189	2.06203e-07	3
Cluster-14561.16	8.51374	up	--	--	IAA	2.16008	up	Indole-3-acetic acid	C00954	ko00380,ko01100,ko04075	0.855759	5.93168e-06	3
Cluster-14753.0	7.89052	up	--	--	IAA	2.16008	up	Indole-3-acetic acid	C00954	ko00380,ko01100,ko04075	0.837097	1.47574e-05	3
Cluster-14809.0	8.78163	up	K01868	ko00970	IAA	2.16008	up	Indole-3-acetic acid	C00954	ko00380,ko01100,ko04075	0.863884	3.8316e-06	3
Cluster-15017.8	6.7088	up	--	--	IAA	2.16008	up	Indole-3-acetic acid	C00954	ko00380,ko01100,ko04075	0.870528	2.62424e-06	3
Cluster-15157.0	8.33801	up	--	--	IAA	2.16008	up	Indole-3-acetic acid	C00954	ko00380,ko01100,ko04075	0.81373	3.98777e-05	3
Cluster-15237.2	2.03114	up	--	--	IAA	2.16008	up	Indole-3-acetic acid	C00954	ko00380,ko01100,ko04075	0.817295	3.45775e-05	3
Cluster-15565.16	8.63827	up	--	--	IAA	2.16008	up	Indole-3-acetic acid	C00954	ko00380,ko01100,ko04075	0.839493	1.32124e-05	3
Cluster-15565.3	6.88276	up	--	--	IAA	2.16008	up	Indole-3-acetic acid	C00954	ko00380,ko01100,ko04075	0.825361	2.4755e-05	3
Cluster-15624.1	2.90937	up	--	--	IAA	2.16008	up	Indole-3-acetic acid	C00954	ko00380,ko01100,ko04075	0.8223	2.81575e-05	3
Cluster-15866.6	7.71058	up	--	--	IAA	2.16008	up	Indole-3-acetic acid	C00954	ko00380,ko01100,ko04075	0.806617	5.25433e-05	3
Cluster-15971.0	7.68542	up	K01689	ko00010,ko01100,ko01110,ko01200,ko01230,ko03018	IAA	2.16008	up	Indole-3-acetic acid	C00954	ko00380,ko01100,ko04075	0.84117	1.22158e-05	3
Cluster-16179.0	6.63001	up	--	--	IAA	2.16008	up	Indole-3-acetic acid	C00954	ko00380,ko01100,ko04075	0.852744	6.92987e-06	3
Cluster-16545.57	6.76052	up	--	--	IAA	2.16008	up	Indole-3-acetic acid	C00954	ko00380,ko01100,ko04075	0.82284	2.75293e-05	3
Cluster-16999.0	7.54549	up	K13457	ko04626	IAA	2.16008	up	Indole-3-acetic acid	C00954	ko00380,ko01100,ko04075	0.822142	2.83425e-05	3
Cluster-17034.0	7.89302	up	--	--	IAA	2.16008	up	Indole-3-acetic acid	C00954	ko00380,ko01100,ko04075	0.877632	1.71024e-06	3
Cluster-17119.15	10.2844	up	--	--	IAA	2.16008	up	Indole-3-acetic acid	C00954	ko00380,ko01100,ko04075	0.840351	1.26942e-05	3
Cluster-17119.3	2.53276	up	--	--	IAA	2.16008	up	Indole-3-acetic acid	C00954	ko00380,ko01100,ko04075	0.822293	2.81647e-05	3
Cluster-17457.3	8.59089	up	--	--	IAA	2.16008	up	Indole-3-acetic acid	C00954	ko00380,ko01100,ko04075	0.882761	1.23476e-06	3
Cluster-17510.0	7.68422	up	K05310	ko00563,ko01100	IAA	2.16008	up	Indole-3-acetic acid	C00954	ko00380,ko01100,ko04075	0.891577	6.79909e-07	3
Cluster-17988.10	10.8599	up	--	--	IAA	2.16008	up	Indole-3-acetic acid	C00954	ko00380,ko01100,ko04075	0.821079	2.96204e-05	3
Cluster-17988.14	4.98566	up	--	--	IAA	2.16008	up	Indole-3-acetic acid	C00954	ko00380,ko01100,ko04075	0.84286	1.1277e-05	3
Cluster-17988.7	12.3968	up	--	--	IAA	2.16008	up	Indole-3-acetic acid	C00954	ko00380,ko01100,ko04075	0.857448	5.42846e-06	3
Cluster-18007.0	7.31475	up	--	--	IAA	2.16008	up	Indole-3-acetic acid	C00954	ko00380,ko01100,ko04075	0.882341	1.26886e-06	3
Cluster-18015.2	7.60246	up	--	--	IAA	2.16008	up	Indole-3-acetic acid	C00954	ko00380,ko01100,ko04075	0.867226	3.17544e-06	3
Cluster-18115.0	7.39555	up	--	--	IAA	2.16008	up	Indole-3-acetic acid	C00954	ko00380,ko01100,ko04075	0.802395	6.1569e-05	3
Cluster-18122.115	10.0935	up	--	--	IAA	2.16008	up	Indole-3-acetic acid	C00954	ko00380,ko01100,ko04075	0.908497	1.84843e-07	3
Cluster-18122.132	3.45173	up	--	--	IAA	2.16008	up	Indole-3-acetic acid	C00954	ko00380,ko01100,ko04075	0.802971	6.02636e-05	3
Cluster-18122.142	9.81895	up	--	--	IAA	2.16008	up	Indole-3-acetic acid	C00954	ko00380,ko01100,ko04075	0.905152	2.43695e-07	3
Cluster-18122.184	2.5631	up	--	--	IAA	2.16008	up	Indole-3-acetic acid	C00954	ko00380,ko01100,ko04075	0.899623	3.76635e-07	3
Cluster-18122.185	2.68036	up	--	--	IAA	2.16008	up	Indole-3-acetic acid	C00954	ko00380,ko01100,ko04075	0.879341	1.53683e-06	3
Cluster-18122.98	6.06686	up	K11262	ko00061,ko00254,ko00620,ko00640,ko01100,ko01110,ko01212	IAA	2.16008	up	Indole-3-acetic acid	C00954	ko00380,ko01100,ko04075	0.845283	1.00391e-05	3
Cluster-18248.0	7.44209	up	--	--	IAA	2.16008	up	Indole-3-acetic acid	C00954	ko00380,ko01100,ko04075	0.821887	2.86454e-05	3
Cluster-18376.13	3.07907	up	--	--	IAA	2.16008	up	Indole-3-acetic acid	C00954	ko00380,ko01100,ko04075	0.892389	6.41945e-07	3
Cluster-18376.6	10.2562	up	--	--	IAA	2.16008	up	Indole-3-acetic acid	C00954	ko00380,ko01100,ko04075	0.80405	5.78845e-05	3
Cluster-18398.0	6.99308	up	--	--	IAA	2.16008	up	Indole-3-acetic acid	C00954	ko00380,ko01100,ko04075	0.837118	1.47431e-05	3
Cluster-18399.21	2.67483	up	--	--	IAA	2.16008	up	Indole-3-acetic acid	C00954	ko00380,ko01100,ko04075	0.807412	5.09771e-05	3
Cluster-18432.0	8.96947	up	K13993	ko04141	IAA	2.16008	up	Indole-3-acetic acid	C00954	ko00380,ko01100,ko04075	0.907861	1.94983e-07	3
Cluster-18483.17	8.71172	up	--	--	IAA	2.16008	up	Indole-3-acetic acid	C00954	ko00380,ko01100,ko04075	0.879842	1.48894e-06	3
Cluster-18521.0	6.65999	up	--	--	IAA	2.16008	up	Indole-3-acetic acid	C00954	ko00380,ko01100,ko04075	0.828045	2.20681e-05	3
Cluster-18628.0	8.91824	up	--	--	IAA	2.16008	up	Indole-3-acetic acid	C00954	ko00380,ko01100,ko04075	0.823165	2.71573e-05	3
Cluster-18628.1	13.5326	up	K07151	ko00510,ko00513,ko01100,ko04141	IAA	2.16008	up	Indole-3-acetic acid	C00954	ko00380,ko01100,ko04075	0.88828	8.54802e-07	3
Cluster-18628.10	9.64218	up	--	--	IAA	2.16008	up	Indole-3-acetic acid	C00954	ko00380,ko01100,ko04075	0.872463	2.34125e-06	3
Cluster-18628.8	11.3621	up	K07151	ko00510,ko00513,ko01100,ko04141	IAA	2.16008	up	Indole-3-acetic acid	C00954	ko00380,ko01100,ko04075	0.856455	5.71951e-06	3
Cluster-18647.0	6.68623	up	--	--	IAA	2.16008	up	Indole-3-acetic acid	C00954	ko00380,ko01100,ko04075	0.834712	1.64456e-05	3
Cluster-18694.61	11.3804	up	--	--	IAA	2.16008	up	Indole-3-acetic acid	C00954	ko00380,ko01100,ko04075	0.858201	5.21618e-06	3
Cluster-18694.65	8.10387	up	--	--	IAA	2.16008	up	Indole-3-acetic acid	C00954	ko00380,ko01100,ko04075	0.800413	6.62393e-05	3
Cluster-18855.0	10.0716	up	--	--	IAA	2.16008	up	Indole-3-acetic acid	C00954	ko00380,ko01100,ko04075	0.834407	1.66725e-05	3
Cluster-18976.20	9.16216	up	--	--	IAA	2.16008	up	Indole-3-acetic acid	C00954	ko00380,ko01100,ko04075	0.831632	1.88677e-05	3
Cluster-19116.0	7.0535	up	--	--	IAA	2.16008	up	Indole-3-acetic acid	C00954	ko00380,ko01100,ko04075	0.825196	2.49293e-05	3
Cluster-19128.0	6.92376	up	--	--	IAA	2.16008	up	Indole-3-acetic acid	C00954	ko00380,ko01100,ko04075	0.802798	6.06525e-05	3
Cluster-19152.18	8.32431	up	--	--	IAA	2.16008	up	Indole-3-acetic acid	C00954	ko00380,ko01100,ko04075	0.829654	2.05795e-05	3
Cluster-19202.0	6.54682	up	--	--	IAA	2.16008	up	Indole-3-acetic acid	C00954	ko00380,ko01100,ko04075	0.877483	1.72612e-06	3
Cluster-19332.16	8.48084	up	--	--	IAA	2.16008	up	Indole-3-acetic acid	C00954	ko00380,ko01100,ko04075	0.858898	5.02614e-06	3
Cluster-19333.13	7.26422	up	--	--	IAA	2.16008	up	Indole-3-acetic acid	C00954	ko00380,ko01100,ko04075	0.823985	2.62385e-05	3
Cluster-19437.0	6.45469	up	--	--	IAA	2.16008	up	Indole-3-acetic acid	C00954	ko00380,ko01100,ko04075	0.81759	3.41677e-05	3
Cluster-19457.44	7.29287	up	--	--	IAA	2.16008	up	Indole-3-acetic acid	C00954	ko00380,ko01100,ko04075	0.801132	6.45101e-05	3
Cluster-19546.0	7.73826	up	--	--	IAA	2.16008	up	Indole-3-acetic acid	C00954	ko00380,ko01100,ko04075	0.837115	1.47448e-05	3
Cluster-19641.0	7.56359	up	--	--	IAA	2.16008	up	Indole-3-acetic acid	C00954	ko00380,ko01100,ko04075	0.831674	1.88327e-05	3
Cluster-1965.22	13.4683	up	--	--	IAA	2.16008	up	Indole-3-acetic acid	C00954	ko00380,ko01100,ko04075	0.900604	3.49295e-07	3
Cluster-1970.116	14.4598	up	--	--	IAA	2.16008	up	Indole-3-acetic acid	C00954	ko00380,ko01100,ko04075	0.906515	2.18014e-07	3
Cluster-1970.15	13.7428	up	--	--	IAA	2.16008	up	Indole-3-acetic acid	C00954	ko00380,ko01100,ko04075	0.903505	2.78189e-07	3
Cluster-1970.16	14.7566	up	--	--	IAA	2.16008	up	Indole-3-acetic acid	C00954	ko00380,ko01100,ko04075	0.897242	4.50828e-07	3
Cluster-1970.7	14.1563	up	--	--	IAA	2.16008	up	Indole-3-acetic acid	C00954	ko00380,ko01100,ko04075	0.903851	2.70623e-07	3
Cluster-19726.16	6.89	up	K00128	ko00010,ko00053,ko00071,ko00280,ko00310,ko00330,ko00340,ko00380,ko00410,ko00561,ko00620,ko00770,ko00903,ko01100,ko01110,ko01240	IAA	2.16008	up	Indole-3-acetic acid	C00954	ko00380,ko01100,ko04075	0.821607	2.89801e-05	3
Cluster-19855.2	8.12044	up	K01230	ko00510,ko00513,ko01100,ko04141	IAA	2.16008	up	Indole-3-acetic acid	C00954	ko00380,ko01100,ko04075	0.854718	6.26134e-06	3
Cluster-19855.25	8.11144	up	--	--	IAA	2.16008	up	Indole-3-acetic acid	C00954	ko00380,ko01100,ko04075	0.84585	9.76697e-06	3
Cluster-19862.0	7.78748	up	--	--	IAA	2.16008	up	Indole-3-acetic acid	C00954	ko00380,ko01100,ko04075	0.835454	1.59031e-05	3
Cluster-19895.14	13.5447	up	--	--	IAA	2.16008	up	Indole-3-acetic acid	C00954	ko00380,ko01100,ko04075	0.877446	1.73016e-06	3
Cluster-19895.16	2.08106	up	--	--	IAA	2.16008	up	Indole-3-acetic acid	C00954	ko00380,ko01100,ko04075	0.820389	3.04761e-05	3
Cluster-19895.17	2.41481	up	--	--	IAA	2.16008	up	Indole-3-acetic acid	C00954	ko00380,ko01100,ko04075	0.874067	2.12691e-06	3
Cluster-19895.18	1.90721	up	--	--	IAA	2.16008	up	Indole-3-acetic acid	C00954	ko00380,ko01100,ko04075	0.810001	4.61467e-05	3
Cluster-19895.2	3.71425	up	--	--	IAA	2.16008	up	Indole-3-acetic acid	C00954	ko00380,ko01100,ko04075	0.884068	1.13364e-06	3
Cluster-19895.21	2.96734	up	--	--	IAA	2.16008	up	Indole-3-acetic acid	C00954	ko00380,ko01100,ko04075	0.852393	7.05469e-06	3
Cluster-19895.22	4.60489	up	--	--	IAA	2.16008	up	Indole-3-acetic acid	C00954	ko00380,ko01100,ko04075	0.841476	1.20408e-05	3
Cluster-19895.23	4.02272	up	--	--	IAA	2.16008	up	Indole-3-acetic acid	C00954	ko00380,ko01100,ko04075	0.82518	2.49464e-05	3
Cluster-19895.24	2.34972	up	--	--	IAA	2.16008	up	Indole-3-acetic acid	C00954	ko00380,ko01100,ko04075	0.801828	6.28743e-05	3
Cluster-19895.25	2.40951	up	--	--	IAA	2.16008	up	Indole-3-acetic acid	C00954	ko00380,ko01100,ko04075	0.865186	3.5632e-06	3
Cluster-19895.26	3.19646	up	--	--	IAA	2.16008	up	Indole-3-acetic acid	C00954	ko00380,ko01100,ko04075	0.866765	3.25976e-06	3
Cluster-19895.28	2.8477	up	--	--	IAA	2.16008	up	Indole-3-acetic acid	C00954	ko00380,ko01100,ko04075	0.869874	2.72641e-06	3
Cluster-19895.29	7.4051	up	--	--	IAA	2.16008	up	Indole-3-acetic acid	C00954	ko00380,ko01100,ko04075	0.824788	2.5364e-05	3
Cluster-19895.31	2.86268	up	--	--	IAA	2.16008	up	Indole-3-acetic acid	C00954	ko00380,ko01100,ko04075	0.818414	3.3043e-05	3
Cluster-19895.33	4.32259	up	--	--	IAA	2.16008	up	Indole-3-acetic acid	C00954	ko00380,ko01100,ko04075	0.833827	1.71124e-05	3
Cluster-19895.35	5.42002	up	--	--	IAA	2.16008	up	Indole-3-acetic acid	C00954	ko00380,ko01100,ko04075	0.883889	1.14705e-06	3
Cluster-19895.37	4.44909	up	--	--	IAA	2.16008	up	Indole-3-acetic acid	C00954	ko00380,ko01100,ko04075	0.865869	3.42909e-06	3
Cluster-19895.42	3.68044	up	--	--	IAA	2.16008	up	Indole-3-acetic acid	C00954	ko00380,ko01100,ko04075	0.850272	7.85225e-06	3
Cluster-19895.43	3.52662	up	--	--	IAA	2.16008	up	Indole-3-acetic acid	C00954	ko00380,ko01100,ko04075	0.877364	1.73893e-06	3
Cluster-19895.44	11.0582	up	--	--	IAA	2.16008	up	Indole-3-acetic acid	C00954	ko00380,ko01100,ko04075	0.852646	6.96444e-06	3
Cluster-19895.46	3.91985	up	--	--	IAA	2.16008	up	Indole-3-acetic acid	C00954	ko00380,ko01100,ko04075	0.876016	1.88945e-06	3
Cluster-19895.47	11.3716	up	--	--	IAA	2.16008	up	Indole-3-acetic acid	C00954	ko00380,ko01100,ko04075	0.804331	5.72775e-05	3
Cluster-19895.6	4.12099	up	--	--	IAA	2.16008	up	Indole-3-acetic acid	C00954	ko00380,ko01100,ko04075	0.829639	2.05927e-05	3
Cluster-19895.8	10.426	up	--	--	IAA	2.16008	up	Indole-3-acetic acid	C00954	ko00380,ko01100,ko04075	0.858749	5.06639e-06	3
Cluster-19895.9	9.2166	up	--	--	IAA	2.16008	up	Indole-3-acetic acid	C00954	ko00380,ko01100,ko04075	0.8444	1.04759e-05	3
Cluster-19900.0	10.2465	up	--	--	IAA	2.16008	up	Indole-3-acetic acid	C00954	ko00380,ko01100,ko04075	0.811134	4.41579e-05	3
Cluster-20068.0	7.42577	up	--	--	IAA	2.16008	up	Indole-3-acetic acid	C00954	ko00380,ko01100,ko04075	0.876629	1.81965e-06	3
Cluster-20228.0	7.9467	up	--	--	IAA	2.16008	up	Indole-3-acetic acid	C00954	ko00380,ko01100,ko04075	0.806112	5.35593e-05	3
Cluster-20231.10	9.16485	up	--	--	IAA	2.16008	up	Indole-3-acetic acid	C00954	ko00380,ko01100,ko04075	0.820494	3.03444e-05	3
Cluster-20231.25	8.09257	up	--	--	IAA	2.16008	up	Indole-3-acetic acid	C00954	ko00380,ko01100,ko04075	0.863098	4.00181e-06	3
Cluster-20319.0	6.73487	up	--	--	IAA	2.16008	up	Indole-3-acetic acid	C00954	ko00380,ko01100,ko04075	0.800571	6.58562e-05	3
Cluster-20555.0	7.91385	up	--	--	IAA	2.16008	up	Indole-3-acetic acid	C00954	ko00380,ko01100,ko04075	0.862279	4.18605e-06	3
Cluster-20582.8	8.42961	up	K01868	ko00970	IAA	2.16008	up	Indole-3-acetic acid	C00954	ko00380,ko01100,ko04075	0.821039	2.96697e-05	3
Cluster-20588.4	3.43649	up	K14411	ko03015	IAA	2.16008	up	Indole-3-acetic acid	C00954	ko00380,ko01100,ko04075	0.835273	1.60338e-05	3
Cluster-20636.0	6.63251	up	--	--	IAA	2.16008	up	Indole-3-acetic acid	C00954	ko00380,ko01100,ko04075	0.812469	4.19099e-05	3
Cluster-20692.7	4.90963	up	K02993	ko03010	IAA	2.16008	up	Indole-3-acetic acid	C00954	ko00380,ko01100,ko04075	0.800709	6.55232e-05	3
Cluster-20761.0	7.1122	up	--	--	IAA	2.16008	up	Indole-3-acetic acid	C00954	ko00380,ko01100,ko04075	0.857269	5.47999e-06	3
Cluster-20779.0	6.92708	up	--	--	IAA	2.16008	up	Indole-3-acetic acid	C00954	ko00380,ko01100,ko04075	0.818169	3.3374e-05	3
Cluster-20927.0	9.19848	up	--	--	IAA	2.16008	up	Indole-3-acetic acid	C00954	ko00380,ko01100,ko04075	0.826228	2.38586e-05	3
Cluster-21005.21	8.82238	up	--	--	IAA	2.16008	up	Indole-3-acetic acid	C00954	ko00380,ko01100,ko04075	0.856125	5.81939e-06	3
Cluster-21022.0	7.45939	up	--	--	IAA	2.16008	up	Indole-3-acetic acid	C00954	ko00380,ko01100,ko04075	0.804747	5.63904e-05	3
Cluster-21184.3	8.95994	up	--	--	IAA	2.16008	up	Indole-3-acetic acid	C00954	ko00380,ko01100,ko04075	0.82368	2.65776e-05	3
Cluster-21236.0	8.45175	up	--	--	IAA	2.16008	up	Indole-3-acetic acid	C00954	ko00380,ko01100,ko04075	0.8539	6.53129e-06	3
Cluster-21418.8	7.29468	up	--	--	IAA	2.16008	up	Indole-3-acetic acid	C00954	ko00380,ko01100,ko04075	0.841349	1.2113e-05	3
Cluster-21564.13	8.80762	up	--	--	IAA	2.16008	up	Indole-3-acetic acid	C00954	ko00380,ko01100,ko04075	0.812836	4.13097e-05	3
Cluster-21564.17	3.83839	up	--	--	IAA	2.16008	up	Indole-3-acetic acid	C00954	ko00380,ko01100,ko04075	0.802174	6.20748e-05	3
Cluster-21564.18	4.04372	up	--	--	IAA	2.16008	up	Indole-3-acetic acid	C00954	ko00380,ko01100,ko04075	0.841049	1.22854e-05	3
Cluster-21564.20	11.4765	up	--	--	IAA	2.16008	up	Indole-3-acetic acid	C00954	ko00380,ko01100,ko04075	0.894546	5.49765e-07	3
Cluster-21564.21	12.0914	up	--	--	IAA	2.16008	up	Indole-3-acetic acid	C00954	ko00380,ko01100,ko04075	0.842784	1.13179e-05	3
Cluster-21564.26	6.27291	up	--	--	IAA	2.16008	up	Indole-3-acetic acid	C00954	ko00380,ko01100,ko04075	0.867919	3.05205e-06	3
Cluster-21564.31	5.93767	up	--	--	IAA	2.16008	up	Indole-3-acetic acid	C00954	ko00380,ko01100,ko04075	0.877219	1.75464e-06	3
Cluster-21564.32	4.00765	up	--	--	IAA	2.16008	up	Indole-3-acetic acid	C00954	ko00380,ko01100,ko04075	0.815065	3.78163e-05	3
Cluster-21564.37	8.57034	up	--	--	IAA	2.16008	up	Indole-3-acetic acid	C00954	ko00380,ko01100,ko04075	0.83009	2.01917e-05	3
Cluster-21564.53	9.92935	up	--	--	IAA	2.16008	up	Indole-3-acetic acid	C00954	ko00380,ko01100,ko04075	0.88452	1.10038e-06	3
Cluster-21564.6	2.43617	up	--	--	IAA	2.16008	up	Indole-3-acetic acid	C00954	ko00380,ko01100,ko04075	0.828297	2.18292e-05	3
Cluster-21640.23	7.36566	up	--	--	IAA	2.16008	up	Indole-3-acetic acid	C00954	ko00380,ko01100,ko04075	0.812032	4.26357e-05	3
Cluster-21701.0	7.56523	up	--	--	IAA	2.16008	up	Indole-3-acetic acid	C00954	ko00380,ko01100,ko04075	0.81201	4.26729e-05	3
Cluster-21763.34	7.22438	up	K01937	ko00240,ko01100,ko01232,ko01240	IAA	2.16008	up	Indole-3-acetic acid	C00954	ko00380,ko01100,ko04075	0.813718	3.98958e-05	3
Cluster-21763.61	5.58342	up	--	--	IAA	2.16008	up	Indole-3-acetic acid	C00954	ko00380,ko01100,ko04075	0.894449	5.53658e-07	3
Cluster-21763.68	6.62757	up	--	--	IAA	2.16008	up	Indole-3-acetic acid	C00954	ko00380,ko01100,ko04075	0.903146	2.86258e-07	3
Cluster-21781.2	6.71086	up	--	--	IAA	2.16008	up	Indole-3-acetic acid	C00954	ko00380,ko01100,ko04075	0.859098	4.9727e-06	3
Cluster-21787.4	10.3727	up	--	--	IAA	2.16008	up	Indole-3-acetic acid	C00954	ko00380,ko01100,ko04075	0.805388	5.50463e-05	3
Cluster-21787.5	4.15485	up	--	--	IAA	2.16008	up	Indole-3-acetic acid	C00954	ko00380,ko01100,ko04075	0.868434	2.96313e-06	3
Cluster-21789.0	6.68812	up	--	--	IAA	2.16008	up	Indole-3-acetic acid	C00954	ko00380,ko01100,ko04075	0.832345	1.82813e-05	3
Cluster-21816.0	6.83387	up	--	--	IAA	2.16008	up	Indole-3-acetic acid	C00954	ko00380,ko01100,ko04075	0.838998	1.35199e-05	3
Cluster-21835.0	7.51644	up	--	--	IAA	2.16008	up	Indole-3-acetic acid	C00954	ko00380,ko01100,ko04075	0.820198	3.07166e-05	3
Cluster-21999.0	8.07301	up	--	--	IAA	2.16008	up	Indole-3-acetic acid	C00954	ko00380,ko01100,ko04075	0.891842	6.67336e-07	3
Cluster-22070.0	6.98911	up	--	--	IAA	2.16008	up	Indole-3-acetic acid	C00954	ko00380,ko01100,ko04075	0.864525	3.69744e-06	3
Cluster-22084.0	7.54642	up	--	--	IAA	2.16008	up	Indole-3-acetic acid	C00954	ko00380,ko01100,ko04075	0.821705	2.88625e-05	3
Cluster-22218.0	7.45743	up	--	--	IAA	2.16008	up	Indole-3-acetic acid	C00954	ko00380,ko01100,ko04075	0.884468	1.1042e-06	3
Cluster-22230.1	5.84361	up	K12854	ko03040	IAA	2.16008	up	Indole-3-acetic acid	C00954	ko00380,ko01100,ko04075	0.822204	2.82695e-05	3
Cluster-22230.7	9.01138	up	K12854	ko03040	IAA	2.16008	up	Indole-3-acetic acid	C00954	ko00380,ko01100,ko04075	0.832113	1.8471e-05	3
Cluster-22347.0	7.67576	up	--	--	IAA	2.16008	up	Indole-3-acetic acid	C00954	ko00380,ko01100,ko04075	0.833884	1.70688e-05	3
Cluster-22361.0	7.44187	up	--	--	IAA	2.16008	up	Indole-3-acetic acid	C00954	ko00380,ko01100,ko04075	0.819085	3.21512e-05	3
Cluster-22414.0	7.47373	up	--	--	IAA	2.16008	up	Indole-3-acetic acid	C00954	ko00380,ko01100,ko04075	0.809303	4.74076e-05	3
Cluster-22444.0	8.08233	up	--	--	IAA	2.16008	up	Indole-3-acetic acid	C00954	ko00380,ko01100,ko04075	0.833825	1.71144e-05	3
Cluster-22464.0	9.70213	up	--	--	IAA	2.16008	up	Indole-3-acetic acid	C00954	ko00380,ko01100,ko04075	0.86325	3.96853e-06	3
Cluster-22610.0	8.32392	up	--	--	IAA	2.16008	up	Indole-3-acetic acid	C00954	ko00380,ko01100,ko04075	0.862099	4.22763e-06	3
Cluster-22643.0	6.94887	up	--	--	IAA	2.16008	up	Indole-3-acetic acid	C00954	ko00380,ko01100,ko04075	0.820415	3.04444e-05	3
Cluster-22677.0	6.76029	up	--	--	IAA	2.16008	up	Indole-3-acetic acid	C00954	ko00380,ko01100,ko04075	0.848124	8.73792e-06	3
Cluster-22781.0	6.60509	up	--	--	IAA	2.16008	up	Indole-3-acetic acid	C00954	ko00380,ko01100,ko04075	0.840217	1.27739e-05	3
Cluster-22819.1	7.589	up	--	--	IAA	2.16008	up	Indole-3-acetic acid	C00954	ko00380,ko01100,ko04075	0.80073	6.54721e-05	3
Cluster-22892.37	7.36256	up	--	--	IAA	2.16008	up	Indole-3-acetic acid	C00954	ko00380,ko01100,ko04075	0.816951	3.50617e-05	3
Cluster-22907.0	6.57305	up	--	--	IAA	2.16008	up	Indole-3-acetic acid	C00954	ko00380,ko01100,ko04075	0.800416	6.62321e-05	3
Cluster-22958.0	8.32941	up	--	--	IAA	2.16008	up	Indole-3-acetic acid	C00954	ko00380,ko01100,ko04075	0.846784	9.33228e-06	3
Cluster-23068.10	8.91285	up	--	--	IAA	2.16008	up	Indole-3-acetic acid	C00954	ko00380,ko01100,ko04075	0.812093	4.25336e-05	3
Cluster-23094.0	7.09671	up	--	--	IAA	2.16008	up	Indole-3-acetic acid	C00954	ko00380,ko01100,ko04075	0.807344	5.11094e-05	3
Cluster-23185.0	8.33038	up	--	--	IAA	2.16008	up	Indole-3-acetic acid	C00954	ko00380,ko01100,ko04075	0.85153	7.37071e-06	3
Cluster-23305.0	8.65417	up	--	--	IAA	2.16008	up	Indole-3-acetic acid	C00954	ko00380,ko01100,ko04075	0.814695	3.83785e-05	3
Cluster-23316.14	5.10809	up	K01611	ko00270,ko00330,ko01100	IAA	2.16008	up	Indole-3-acetic acid	C00954	ko00380,ko01100,ko04075	0.808381	4.91202e-05	3
Cluster-23325.0	7.59173	up	--	--	IAA	2.16008	up	Indole-3-acetic acid	C00954	ko00380,ko01100,ko04075	0.808873	4.82012e-05	3
Cluster-23331.57	6.73661	up	--	--	IAA	2.16008	up	Indole-3-acetic acid	C00954	ko00380,ko01100,ko04075	0.836447	1.52019e-05	3
Cluster-23388.1	10.0189	up	K13126	ko03015,ko03018	IAA	2.16008	up	Indole-3-acetic acid	C00954	ko00380,ko01100,ko04075	0.824162	2.60439e-05	3
Cluster-23407.0	7.75107	up	--	--	IAA	2.16008	up	Indole-3-acetic acid	C00954	ko00380,ko01100,ko04075	0.808038	4.97702e-05	3
Cluster-23438.0	8.84646	up	K02914	ko03010	IAA	2.16008	up	Indole-3-acetic acid	C00954	ko00380,ko01100,ko04075	0.88567	1.01956e-06	3
Cluster-23517.49	4.77698	up	--	--	IAA	2.16008	up	Indole-3-acetic acid	C00954	ko00380,ko01100,ko04075	0.80144	6.37827e-05	3
Cluster-23535.11	4.81411	up	--	--	IAA	2.16008	up	Indole-3-acetic acid	C00954	ko00380,ko01100,ko04075	0.819371	3.17778e-05	3
Cluster-23561.0	6.68762	up	--	--	IAA	2.16008	up	Indole-3-acetic acid	C00954	ko00380,ko01100,ko04075	0.83227	1.83425e-05	3
Cluster-23619.0	6.75855	up	--	--	IAA	2.16008	up	Indole-3-acetic acid	C00954	ko00380,ko01100,ko04075	0.819168	3.2042e-05	3
Cluster-23620.0	7.33023	up	--	--	IAA	2.16008	up	Indole-3-acetic acid	C00954	ko00380,ko01100,ko04075	0.883645	1.16559e-06	3
Cluster-23655.0	9.02739	up	K14015	ko04141	IAA	2.16008	up	Indole-3-acetic acid	C00954	ko00380,ko01100,ko04075	0.849924	7.99054e-06	3
Cluster-23662.0	7.96938	up	--	--	IAA	2.16008	up	Indole-3-acetic acid	C00954	ko00380,ko01100,ko04075	0.833906	1.7052e-05	3
Cluster-23696.0	7.45901	up	--	--	IAA	2.16008	up	Indole-3-acetic acid	C00954	ko00380,ko01100,ko04075	0.861384	4.39585e-06	3
Cluster-23718.0	7.09124	up	--	--	IAA	2.16008	up	Indole-3-acetic acid	C00954	ko00380,ko01100,ko04075	0.821577	2.9016e-05	3
Cluster-23750.0	6.60314	up	--	--	IAA	2.16008	up	Indole-3-acetic acid	C00954	ko00380,ko01100,ko04075	0.879965	1.47742e-06	3
Cluster-23759.0	8.01092	up	--	--	IAA	2.16008	up	Indole-3-acetic acid	C00954	ko00380,ko01100,ko04075	0.813636	4.00256e-05	3
Cluster-23899.0	9.26057	up	--	--	IAA	2.16008	up	Indole-3-acetic acid	C00954	ko00380,ko01100,ko04075	0.802034	6.23967e-05	3
Cluster-24011.16	3.24838	up	K00558	ko00270,ko01100	IAA	2.16008	up	Indole-3-acetic acid	C00954	ko00380,ko01100,ko04075	0.871771	2.43933e-06	3
Cluster-24011.21	4.76361	up	K00558	ko00270,ko01100	IAA	2.16008	up	Indole-3-acetic acid	C00954	ko00380,ko01100,ko04075	0.902235	3.07596e-07	3
Cluster-24011.24	1.90052	up	K00558	ko00270,ko01100	IAA	2.16008	up	Indole-3-acetic acid	C00954	ko00380,ko01100,ko04075	0.817042	3.49328e-05	3
Cluster-24049.0	9.39597	up	--	--	IAA	2.16008	up	Indole-3-acetic acid	C00954	ko00380,ko01100,ko04075	0.809761	4.65766e-05	3
Cluster-24089.0	8.3213	up	--	--	IAA	2.16008	up	Indole-3-acetic acid	C00954	ko00380,ko01100,ko04075	0.852577	6.98896e-06	3
Cluster-24186.0	8.56782	up	--	--	IAA	2.16008	up	Indole-3-acetic acid	C00954	ko00380,ko01100,ko04075	0.84032	1.27128e-05	3
Cluster-24187.0	8.47161	up	--	--	IAA	2.16008	up	Indole-3-acetic acid	C00954	ko00380,ko01100,ko04075	0.849587	8.12616e-06	3
Cluster-24321.0	6.63038	up	--	--	IAA	2.16008	up	Indole-3-acetic acid	C00954	ko00380,ko01100,ko04075	0.839052	1.34857e-05	3
Cluster-24334.0	6.39755	up	--	--	IAA	2.16008	up	Indole-3-acetic acid	C00954	ko00380,ko01100,ko04075	0.809982	4.61809e-05	3
Cluster-24436.8	10.3367	up	K02433	ko00970,ko01100	IAA	2.16008	up	Indole-3-acetic acid	C00954	ko00380,ko01100,ko04075	0.801186	6.43817e-05	3
Cluster-24445.0	7.93538	up	--	--	IAA	2.16008	up	Indole-3-acetic acid	C00954	ko00380,ko01100,ko04075	0.879012	1.56902e-06	3
Cluster-24568.3	9.38726	up	--	--	IAA	2.16008	up	Indole-3-acetic acid	C00954	ko00380,ko01100,ko04075	0.815397	3.73186e-05	3
Cluster-24568.6	8.76533	up	--	--	IAA	2.16008	up	Indole-3-acetic acid	C00954	ko00380,ko01100,ko04075	0.821093	2.96041e-05	3
Cluster-24618.0	8.95359	up	--	--	IAA	2.16008	up	Indole-3-acetic acid	C00954	ko00380,ko01100,ko04075	0.878461	1.62418e-06	3
Cluster-24665.0	13.6349	up	--	--	IAA	2.16008	up	Indole-3-acetic acid	C00954	ko00380,ko01100,ko04075	0.863149	3.99073e-06	3
Cluster-24760.3	4.67264	up	--	--	IAA	2.16008	up	Indole-3-acetic acid	C00954	ko00380,ko01100,ko04075	0.825844	2.42524e-05	3
Cluster-24760.7	9.12072	up	--	--	IAA	2.16008	up	Indole-3-acetic acid	C00954	ko00380,ko01100,ko04075	0.874532	2.06807e-06	3
Cluster-24787.2	3.8225	up	--	--	IAA	2.16008	up	Indole-3-acetic acid	C00954	ko00380,ko01100,ko04075	0.854882	6.20826e-06	3
Cluster-24820.0	8.94091	up	--	--	IAA	2.16008	up	Indole-3-acetic acid	C00954	ko00380,ko01100,ko04075	0.813541	4.01769e-05	3
Cluster-24924.1	9.92114	up	--	--	IAA	2.16008	up	Indole-3-acetic acid	C00954	ko00380,ko01100,ko04075	0.811969	4.27399e-05	3
Cluster-24937.0	7.52068	up	--	--	IAA	2.16008	up	Indole-3-acetic acid	C00954	ko00380,ko01100,ko04075	0.844148	1.06038e-05	3
Cluster-24953.0	8.44384	up	--	--	IAA	2.16008	up	Indole-3-acetic acid	C00954	ko00380,ko01100,ko04075	0.884472	1.10391e-06	3
Cluster-24980.0	9.18469	up	--	--	IAA	2.16008	up	Indole-3-acetic acid	C00954	ko00380,ko01100,ko04075	0.858148	5.23098e-06	3
Cluster-25017.0	8.04039	up	--	--	IAA	2.16008	up	Indole-3-acetic acid	C00954	ko00380,ko01100,ko04075	0.800276	6.65738e-05	3
Cluster-25052.0	9.02312	up	--	--	IAA	2.16008	up	Indole-3-acetic acid	C00954	ko00380,ko01100,ko04075	0.859873	4.77018e-06	3
Cluster-25059.0	12.1946	up	--	--	IAA	2.16008	up	Indole-3-acetic acid	C00954	ko00380,ko01100,ko04075	0.837567	1.44425e-05	3
Cluster-25059.101	12.2012	up	--	--	IAA	2.16008	up	Indole-3-acetic acid	C00954	ko00380,ko01100,ko04075	0.866537	3.30218e-06	3
Cluster-25059.11	6.33314	up	K06699	ko03050	IAA	2.16008	up	Indole-3-acetic acid	C00954	ko00380,ko01100,ko04075	0.882465	1.25869e-06	3
Cluster-25059.23	11.733	up	--	--	IAA	2.16008	up	Indole-3-acetic acid	C00954	ko00380,ko01100,ko04075	0.852573	6.99041e-06	3
Cluster-25059.27	3.72847	up	--	--	IAA	2.16008	up	Indole-3-acetic acid	C00954	ko00380,ko01100,ko04075	0.865467	3.50758e-06	3
Cluster-25059.37	12.7978	up	--	--	IAA	2.16008	up	Indole-3-acetic acid	C00954	ko00380,ko01100,ko04075	0.919816	6.66636e-08	3
Cluster-25059.38	15.4779	up	--	--	IAA	2.16008	up	Indole-3-acetic acid	C00954	ko00380,ko01100,ko04075	0.915651	9.86271e-08	3
[truncated: 62,819 more rows]

## Sheet: D-rhizome_vs_X-rhizome
Supplementary Table S7 DAPs and DEGs in quadrants 3 and 7 (2)
geneID	Log2FC_gene	Regulation_gene	KO	KEGG_map_gene	metaID	Log2FC_meta	Regulation_meta	Compounds	CID	KEGG_map_meta	coefficient	pvalue	ninequadrants
Cluster-100006.47	9.58454	up	--	--	IAA-Leu	2.74554	up	N-(3-Indolylacetyl)-L-leucine	--	--	0.848586	8.54029e-06	3
Cluster-100088.5	1.50912	up	K14486	ko04075	IAA-Leu	2.74554	up	N-(3-Indolylacetyl)-L-leucine	--	--	0.813634	4.00296e-05	3
Cluster-100195.1	4.75622	up	K10256	ko01040,ko01100,ko01212	IAA-Leu	2.74554	up	N-(3-Indolylacetyl)-L-leucine	--	--	0.909366	1.71736e-07	3
Cluster-100369.0	1.16766	up	K13435	ko04626	IAA-Leu	2.74554	up	N-(3-Indolylacetyl)-L-leucine	--	--	0.921863	5.45617e-08	3
Cluster-100412.6	10.3686	up	K00660	ko00941,ko00960,ko01100,ko01110,ko04712	IAA-Leu	2.74554	up	N-(3-Indolylacetyl)-L-leucine	--	--	0.855607	5.97878e-06	3
Cluster-100498.0	1.01538	up	--	--	IAA-Leu	2.74554	up	N-(3-Indolylacetyl)-L-leucine	--	--	0.807408	5.09831e-05	3
Cluster-100857.1	6.43402	up	--	--	IAA-Leu	2.74554	up	N-(3-Indolylacetyl)-L-leucine	--	--	0.818855	3.24541e-05	3
Cluster-101039.1	1.4295	up	K01623	ko00010,ko00030,ko00051,ko00710,ko01100,ko01110,ko01200,ko01230	IAA-Leu	2.74554	up	N-(3-Indolylacetyl)-L-leucine	--	--	0.842226	1.16216e-05	3
Cluster-101085.1	8.18414	up	K00083	ko00940,ko01100,ko01110	IAA-Leu	2.74554	up	N-(3-Indolylacetyl)-L-leucine	--	--	0.829977	2.02909e-05	3
Cluster-101139.3	1.99215	up	--	--	IAA-Leu	2.74554	up	N-(3-Indolylacetyl)-L-leucine	--	--	0.989714	6.10229e-15	3
Cluster-101139.6	1.79438	up	--	--	IAA-Leu	2.74554	up	N-(3-Indolylacetyl)-L-leucine	--	--	0.976869	3.83306e-12	3
Cluster-101158.0	6.12667	up	--	--	IAA-Leu	2.74554	up	N-(3-Indolylacetyl)-L-leucine	--	--	0.80331	5.9508e-05	3
Cluster-101163.0	4.03969	up	--	--	IAA-Leu	2.74554	up	N-(3-Indolylacetyl)-L-leucine	--	--	0.847769	8.89196e-06	3
Cluster-101176.7	3.25668	up	--	--	IAA-Leu	2.74554	up	N-(3-Indolylacetyl)-L-leucine	--	--	0.896796	4.6604e-07	3
Cluster-10120.158	1.31319	up	--	--	IAA-Leu	2.74554	up	N-(3-Indolylacetyl)-L-leucine	--	--	0.812085	4.25474e-05	3
Cluster-101220.0	1.15752	up	K05391	ko04626	IAA-Leu	2.74554	up	N-(3-Indolylacetyl)-L-leucine	--	--	0.895369	5.17772e-07	3
Cluster-101300.11	2.08027	up	--	--	IAA-Leu	2.74554	up	N-(3-Indolylacetyl)-L-leucine	--	--	0.898467	4.1122e-07	3
Cluster-101300.9	1.55178	up	--	--	IAA-Leu	2.74554	up	N-(3-Indolylacetyl)-L-leucine	--	--	0.901188	3.33823e-07	3
Cluster-101325.0	1.77298	up	--	--	IAA-Leu	2.74554	up	N-(3-Indolylacetyl)-L-leucine	--	--	0.955128	7.17698e-10	3
Cluster-101406.0	4.30342	up	K13508	ko00561,ko00564,ko01100,ko01110	IAA-Leu	2.74554	up	N-(3-Indolylacetyl)-L-leucine	--	--	0.850349	7.82216e-06	3
Cluster-101970.0	6.9764	up	--	--	IAA-Leu	2.74554	up	N-(3-Indolylacetyl)-L-leucine	--	--	0.820354	3.05201e-05	3
Cluster-102043.15	1.08681	up	--	--	IAA-Leu	2.74554	up	N-(3-Indolylacetyl)-L-leucine	--	--	0.870514	2.62635e-06	3
Cluster-102043.2	1.2615	up	--	--	IAA-Leu	2.74554	up	N-(3-Indolylacetyl)-L-leucine	--	--	0.823896	2.63372e-05	3
Cluster-102227.0	2.43952	up	--	--	IAA-Leu	2.74554	up	N-(3-Indolylacetyl)-L-leucine	--	--	0.918419	7.61951e-08	3
Cluster-102378.0	9.19397	up	--	--	IAA-Leu	2.74554	up	N-(3-Indolylacetyl)-L-leucine	--	--	0.82881	2.1349e-05	3
Cluster-102378.1	6.04706	up	--	--	IAA-Leu	2.74554	up	N-(3-Indolylacetyl)-L-leucine	--	--	0.837618	1.44084e-05	3
Cluster-102378.6	1.87156	up	--	--	IAA-Leu	2.74554	up	N-(3-Indolylacetyl)-L-leucine	--	--	0.816725	3.53825e-05	3
Cluster-102393.7	6.7233	up	K02738	ko03050	IAA-Leu	2.74554	up	N-(3-Indolylacetyl)-L-leucine	--	--	0.811035	4.43289e-05	3
Cluster-102421.1	1.57359	up	--	--	IAA-Leu	2.74554	up	N-(3-Indolylacetyl)-L-leucine	--	--	0.804859	5.61525e-05	3
Cluster-102438.3	14.022	up	K13993	ko04141	IAA-Leu	2.74554	up	N-(3-Indolylacetyl)-L-leucine	--	--	0.80506	5.57294e-05	3
Cluster-102438.4	5.55863	up	K13993	ko04141	IAA-Leu	2.74554	up	N-(3-Indolylacetyl)-L-leucine	--	--	0.80058	6.58352e-05	3
Cluster-102501.2	9.83961	up	--	--	IAA-Leu	2.74554	up	N-(3-Indolylacetyl)-L-leucine	--	--	0.824621	2.55441e-05	3
Cluster-102909.5	4.17825	up	K15402	ko00073	IAA-Leu	2.74554	up	N-(3-Indolylacetyl)-L-leucine	--	--	0.878926	1.57744e-06	3
Cluster-103034.2	2.91371	up	K05681	ko02010	IAA-Leu	2.74554	up	N-(3-Indolylacetyl)-L-leucine	--	--	0.977021	3.6373e-12	3
Cluster-103208.0	2.34409	up	--	--	IAA-Leu	2.74554	up	N-(3-Indolylacetyl)-L-leucine	--	--	0.805976	5.38367e-05	3
Cluster-103382.5	8.14573	up	--	--	IAA-Leu	2.74554	up	N-(3-Indolylacetyl)-L-leucine	--	--	0.801511	6.36144e-05	3
Cluster-103510.0	7.22052	up	--	--	IAA-Leu	2.74554	up	N-(3-Indolylacetyl)-L-leucine	--	--	0.836154	1.54061e-05	3
Cluster-103559.2	1.55673	up	K13412	ko04626	IAA-Leu	2.74554	up	N-(3-Indolylacetyl)-L-leucine	--	--	0.810047	4.60647e-05	3
Cluster-103681.0	2.22859	up	K16190	ko00040,ko00053,ko00520,ko01100,ko01250	IAA-Leu	2.74554	up	N-(3-Indolylacetyl)-L-leucine	--	--	0.869331	2.81366e-06	3
Cluster-104057.2	3.90414	up	--	--	IAA-Leu	2.74554	up	N-(3-Indolylacetyl)-L-leucine	--	--	0.812158	4.24246e-05	3
Cluster-104086.0	1.65085	up	--	--	IAA-Leu	2.74554	up	N-(3-Indolylacetyl)-L-leucine	--	--	0.909492	1.69911e-07	3
Cluster-104140.5	5.84977	up	K16241	ko04712	IAA-Leu	2.74554	up	N-(3-Indolylacetyl)-L-leucine	--	--	0.864044	3.79784e-06	3
Cluster-104250.6	7.02238	up	--	--	IAA-Leu	2.74554	up	N-(3-Indolylacetyl)-L-leucine	--	--	0.83066	1.96932e-05	3
Cluster-104261.2	11.4869	up	K15397	ko00062,ko01100,ko01110,ko04626	IAA-Leu	2.74554	up	N-(3-Indolylacetyl)-L-leucine	--	--	0.829208	2.09837e-05	3
Cluster-104521.4	1.10196	up	K02639	ko00195,ko01100	IAA-Leu	2.74554	up	N-(3-Indolylacetyl)-L-leucine	--	--	0.859273	4.92636e-06	3
Cluster-104644.4	13.4239	up	K12472	ko04144	IAA-Leu	2.74554	up	N-(3-Indolylacetyl)-L-leucine	--	--	0.833438	1.74134e-05	3
Cluster-104681.4	1.90782	up	K15397	ko00062,ko01100,ko01110,ko04626	IAA-Leu	2.74554	up	N-(3-Indolylacetyl)-L-leucine	--	--	0.916642	9.00124e-08	3
Cluster-104712.15	2.7296	up	--	--	IAA-Leu	2.74554	up	N-(3-Indolylacetyl)-L-leucine	--	--	0.802416	6.15196e-05	3
Cluster-104752.0	8.80309	up	--	--	IAA-Leu	2.74554	up	N-(3-Indolylacetyl)-L-leucine	--	--	0.818298	3.31996e-05	3
Cluster-104779.0	1.0425	up	K03403	ko00860,ko01100,ko01110	IAA-Leu	2.74554	up	N-(3-Indolylacetyl)-L-leucine	--	--	0.8363	1.53041e-05	3
Cluster-104854.2	8.98087	up	--	--	IAA-Leu	2.74554	up	N-(3-Indolylacetyl)-L-leucine	--	--	0.840605	1.25438e-05	3
Cluster-104874.0	1.39823	up	--	--	IAA-Leu	2.74554	up	N-(3-Indolylacetyl)-L-leucine	--	--	0.831011	1.93914e-05	3
Cluster-104951.1	7.85828	up	--	--	IAA-Leu	2.74554	up	N-(3-Indolylacetyl)-L-leucine	--	--	0.869782	2.74097e-06	3
Cluster-104991.9	7.52973	up	K03178	ko04120	IAA-Leu	2.74554	up	N-(3-Indolylacetyl)-L-leucine	--	--	0.804344	5.72493e-05	3
Cluster-105447.0	2.18949	up	--	--	IAA-Leu	2.74554	up	N-(3-Indolylacetyl)-L-leucine	--	--	0.879587	1.51319e-06	3
Cluster-105567.1	1.78761	up	--	--	IAA-Leu	2.74554	up	N-(3-Indolylacetyl)-L-leucine	--	--	0.849719	8.0727e-06	3
Cluster-105619.0	1.4729	up	K12604	ko03018	IAA-Leu	2.74554	up	N-(3-Indolylacetyl)-L-leucine	--	--	0.821713	2.88534e-05	3
Cluster-105865.7	3.18201	up	--	--	IAA-Leu	2.74554	up	N-(3-Indolylacetyl)-L-leucine	--	--	0.808833	4.8274e-05	3
Cluster-105866.1	1.13134	up	--	--	IAA-Leu	2.74554	up	N-(3-Indolylacetyl)-L-leucine	--	--	0.839779	1.3038e-05	3
Cluster-106500.1	7.98116	up	K01206	ko00511	IAA-Leu	2.74554	up	N-(3-Indolylacetyl)-L-leucine	--	--	0.859277	4.92542e-06	3
Cluster-106721.2	7.79304	up	K00430	ko00940,ko01100,ko01110	IAA-Leu	2.74554	up	N-(3-Indolylacetyl)-L-leucine	--	--	0.850217	7.87416e-06	3
Cluster-107018.3	1.11331	up	--	--	IAA-Leu	2.74554	up	N-(3-Indolylacetyl)-L-leucine	--	--	0.864426	3.71783e-06	3
Cluster-107446.2	8.24116	up	--	--	IAA-Leu	2.74554	up	N-(3-Indolylacetyl)-L-leucine	--	--	0.870669	2.60277e-06	3
Cluster-107733.2	1.58795	up	K08735	ko03430	IAA-Leu	2.74554	up	N-(3-Indolylacetyl)-L-leucine	--	--	0.837083	1.47663e-05	3
Cluster-107809.0	1.91349	up	--	--	IAA-Leu	2.74554	up	N-(3-Indolylacetyl)-L-leucine	--	--	0.803983	5.80294e-05	3
Cluster-108040.0	2.85151	up	--	--	IAA-Leu	2.74554	up	N-(3-Indolylacetyl)-L-leucine	--	--	0.894109	5.67468e-07	3
Cluster-108106.0	8.65668	up	K13258	ko00943,ko01100,ko01110	IAA-Leu	2.74554	up	N-(3-Indolylacetyl)-L-leucine	--	--	0.813079	4.09156e-05	3
Cluster-108115.0	6.45535	up	--	--	IAA-Leu	2.74554	up	N-(3-Indolylacetyl)-L-leucine	--	--	0.811339	4.38073e-05	3
Cluster-108167.0	2.11016	up	--	--	IAA-Leu	2.74554	up	N-(3-Indolylacetyl)-L-leucine	--	--	0.82713	2.29543e-05	3
Cluster-108168.2	7.12884	up	--	--	IAA-Leu	2.74554	up	N-(3-Indolylacetyl)-L-leucine	--	--	0.852226	7.1149e-06	3
Cluster-108450.2	7.60169	up	--	--	IAA-Leu	2.74554	up	N-(3-Indolylacetyl)-L-leucine	--	--	0.816815	3.52539e-05	3
Cluster-108529.2	8.43583	up	K00679	ko00561,ko01100	IAA-Leu	2.74554	up	N-(3-Indolylacetyl)-L-leucine	--	--	0.847614	8.96022e-06	3
Cluster-108544.7	8.78759	up	--	--	IAA-Leu	2.74554	up	N-(3-Indolylacetyl)-L-leucine	--	--	0.811258	4.39458e-05	3
Cluster-108613.5	6.81013	up	--	--	IAA-Leu	2.74554	up	N-(3-Indolylacetyl)-L-leucine	--	--	0.881721	1.32066e-06	3
Cluster-108613.8	7.33581	up	--	--	IAA-Leu	2.74554	up	N-(3-Indolylacetyl)-L-leucine	--	--	0.851662	7.32158e-06	3
Cluster-108643.0	2.64176	up	K12604	ko03018	IAA-Leu	2.74554	up	N-(3-Indolylacetyl)-L-leucine	--	--	0.890395	7.38678e-07	3
Cluster-108817.1	4.53311	up	--	--	IAA-Leu	2.74554	up	N-(3-Indolylacetyl)-L-leucine	--	--	0.862644	4.10316e-06	3
Cluster-109207.0	2.54338	up	K04374	ko04141	IAA-Leu	2.74554	up	N-(3-Indolylacetyl)-L-leucine	--	--	0.813227	4.06778e-05	3
Cluster-109237.4	11.3815	up	K14491	ko04075	IAA-Leu	2.74554	up	N-(3-Indolylacetyl)-L-leucine	--	--	0.830587	1.97567e-05	3
Cluster-109241.2	2.24653	up	K05391	ko04626	IAA-Leu	2.74554	up	N-(3-Indolylacetyl)-L-leucine	--	--	0.94797	2.29248e-09	3
Cluster-109241.6	11.0848	up	K05391	ko04626	IAA-Leu	2.74554	up	N-(3-Indolylacetyl)-L-leucine	--	--	0.85002	7.95233e-06	3
Cluster-109303.0	11.0057	up	K01897	ko00061,ko00071,ko01100,ko01212,ko04146	IAA-Leu	2.74554	up	N-(3-Indolylacetyl)-L-leucine	--	--	0.821149	2.95355e-05	3
Cluster-109306.3	2.51905	up	--	--	IAA-Leu	2.74554	up	N-(3-Indolylacetyl)-L-leucine	--	--	0.866756	3.26126e-06	3
Cluster-109551.0	8.3291	up	--	--	IAA-Leu	2.74554	up	N-(3-Indolylacetyl)-L-leucine	--	--	0.825071	2.5062e-05	3
Cluster-109655.0	2.0984	up	K01183	ko00520,ko01100	IAA-Leu	2.74554	up	N-(3-Indolylacetyl)-L-leucine	--	--	0.803511	5.90641e-05	3
Cluster-109887.1	4.31124	up	--	--	IAA-Leu	2.74554	up	N-(3-Indolylacetyl)-L-leucine	--	--	0.830034	2.02409e-05	3
Cluster-110165.1	10.1469	up	K22772	ko00944,ko01110	IAA-Leu	2.74554	up	N-(3-Indolylacetyl)-L-leucine	--	--	0.819726	3.13181e-05	3
Cluster-110265.16	8.19707	up	K16040	ko00945,ko01110	IAA-Leu	2.74554	up	N-(3-Indolylacetyl)-L-leucine	--	--	0.847037	9.21735e-06	3
Cluster-110265.2	4.30326	up	K16040	ko00945,ko01110	IAA-Leu	2.74554	up	N-(3-Indolylacetyl)-L-leucine	--	--	0.867568	3.11395e-06	3
Cluster-110265.25	10.3492	up	K16040	ko00945,ko01110	IAA-Leu	2.74554	up	N-(3-Indolylacetyl)-L-leucine	--	--	0.837279	1.46346e-05	3
Cluster-110265.5	2.08085	up	K16040	ko00945,ko01110	IAA-Leu	2.74554	up	N-(3-Indolylacetyl)-L-leucine	--	--	0.831207	1.92255e-05	3
Cluster-110265.9	4.80142	up	K16040	ko00945,ko01110	IAA-Leu	2.74554	up	N-(3-Indolylacetyl)-L-leucine	--	--	0.869988	2.70829e-06	3
Cluster-110882.3	6.55746	up	K05391	ko04626	IAA-Leu	2.74554	up	N-(3-Indolylacetyl)-L-leucine	--	--	0.816473	3.57424e-05	3
Cluster-110945.0	2.27955	up	K19891	ko00500,ko01100	IAA-Leu	2.74554	up	N-(3-Indolylacetyl)-L-leucine	--	--	0.862384	4.16207e-06	3
Cluster-111158.6	8.11691	up	K12812	ko03013,ko03015,ko03040	IAA-Leu	2.74554	up	N-(3-Indolylacetyl)-L-leucine	--	--	0.842139	1.16694e-05	3
Cluster-111192.1	8.22815	up	--	--	IAA-Leu	2.74554	up	N-(3-Indolylacetyl)-L-leucine	--	--	0.831114	1.93037e-05	3
Cluster-111353.0	5.86011	up	--	--	IAA-Leu	2.74554	up	N-(3-Indolylacetyl)-L-leucine	--	--	0.847597	8.96747e-06	3
Cluster-111505.62	8.67142	up	K02109	ko00190,ko00195,ko01100	IAA-Leu	2.74554	up	N-(3-Indolylacetyl)-L-leucine	--	--	0.802714	6.08428e-05	3
Cluster-111554.0	3.17754	up	--	--	IAA-Leu	2.74554	up	N-(3-Indolylacetyl)-L-leucine	--	--	0.852135	7.1479e-06	3
Cluster-111635.0	1.19592	up	K01126	ko00564	IAA-Leu	2.74554	up	N-(3-Indolylacetyl)-L-leucine	--	--	0.888858	8.21625e-07	3
Cluster-111734.7	11.2384	up	--	--	IAA-Leu	2.74554	up	N-(3-Indolylacetyl)-L-leucine	--	--	0.850895	7.61042e-06	3
Cluster-111784.1	7.03869	up	K15405	ko00073,ko01110	IAA-Leu	2.74554	up	N-(3-Indolylacetyl)-L-leucine	--	--	0.844675	1.03384e-05	3
Cluster-111812.1	2.7016	up	--	--	IAA-Leu	2.74554	up	N-(3-Indolylacetyl)-L-leucine	--	--	0.808088	4.96746e-05	3
Cluster-111945.0	8.76146	up	--	--	IAA-Leu	2.74554	up	N-(3-Indolylacetyl)-L-leucine	--	--	0.828206	2.19147e-05	3
Cluster-111945.1	5.6816	up	--	--	IAA-Leu	2.74554	up	N-(3-Indolylacetyl)-L-leucine	--	--	0.800773	6.53694e-05	3
Cluster-111945.4	4.58134	up	--	--	IAA-Leu	2.74554	up	N-(3-Indolylacetyl)-L-leucine	--	--	0.929207	2.53623e-08	3
Cluster-112126.0	1.36934	up	--	--	IAA-Leu	2.74554	up	N-(3-Indolylacetyl)-L-leucine	--	--	0.8648	3.6412e-06	3
Cluster-112144.0	7.87083	up	K00472	ko00330,ko01100	IAA-Leu	2.74554	up	N-(3-Indolylacetyl)-L-leucine	--	--	0.824681	2.54787e-05	3
Cluster-112324.2	10.1828	up	--	--	IAA-Leu	2.74554	up	N-(3-Indolylacetyl)-L-leucine	--	--	0.804878	5.61138e-05	3
Cluster-112410.5	7.54626	up	--	--	IAA-Leu	2.74554	up	N-(3-Indolylacetyl)-L-leucine	--	--	0.874146	2.11681e-06	3
Cluster-112649.0	1.59917	up	K02320	ko03030	IAA-Leu	2.74554	up	N-(3-Indolylacetyl)-L-leucine	--	--	0.829854	2.04009e-05	3
Cluster-112681.25	8.01548	up	K12309	ko00052,ko00511,ko00531,ko00600,ko00604,ko01100	IAA-Leu	2.74554	up	N-(3-Indolylacetyl)-L-leucine	--	--	0.803557	5.89621e-05	3
Cluster-112738.1	6.75663	up	--	--	IAA-Leu	2.74554	up	N-(3-Indolylacetyl)-L-leucine	--	--	0.86932	2.81549e-06	3
Cluster-112750.2	2.95217	up	--	--	IAA-Leu	2.74554	up	N-(3-Indolylacetyl)-L-leucine	--	--	0.844834	1.02594e-05	3
Cluster-112937.1	9.05275	up	--	--	IAA-Leu	2.74554	up	N-(3-Indolylacetyl)-L-leucine	--	--	0.862714	4.08737e-06	3
Cluster-11297.3	7.36513	up	K01733	ko00260,ko00750,ko01100,ko01110,ko01230	IAA-Leu	2.74554	up	N-(3-Indolylacetyl)-L-leucine	--	--	0.812614	4.16725e-05	3
Cluster-113282.3	3.1284	up	--	--	IAA-Leu	2.74554	up	N-(3-Indolylacetyl)-L-leucine	--	--	0.810846	4.46571e-05	3
Cluster-113514.1	6.7045	up	K00128	ko00010,ko00053,ko00071,ko00280,ko00310,ko00330,ko00340,ko00380,ko00410,ko00561,ko00620,ko00770,ko00903,ko01100,ko01110,ko01240	IAA-Leu	2.74554	up	N-(3-Indolylacetyl)-L-leucine	--	--	0.829408	2.08011e-05	3
Cluster-113524.2	2.20024	up	--	--	IAA-Leu	2.74554	up	N-(3-Indolylacetyl)-L-leucine	--	--	0.803429	5.92441e-05	3
Cluster-113588.0	7.60448	up	--	--	IAA-Leu	2.74554	up	N-(3-Indolylacetyl)-L-leucine	--	--	0.848581	8.54257e-06	3
Cluster-113627.1	12.8919	up	--	--	IAA-Leu	2.74554	up	N-(3-Indolylacetyl)-L-leucine	--	--	0.800737	6.5456e-05	3
Cluster-113760.9	3.61657	up	K18819	ko00052,ko01100	IAA-Leu	2.74554	up	N-(3-Indolylacetyl)-L-leucine	--	--	0.859701	4.81459e-06	3
Cluster-113824.5	2.05277	up	--	--	IAA-Leu	2.74554	up	N-(3-Indolylacetyl)-L-leucine	--	--	0.844204	1.0575e-05	3
Cluster-113973.2	10.195	up	--	--	IAA-Leu	2.74554	up	N-(3-Indolylacetyl)-L-leucine	--	--	0.831232	1.92036e-05	3
Cluster-11401.82	4.81039	up	--	--	IAA-Leu	2.74554	up	N-(3-Indolylacetyl)-L-leucine	--	--	0.852602	6.98018e-06	3
Cluster-114083.5	1.81301	up	K00830	ko00250,ko00260,ko00630,ko01100,ko01110,ko01200,ko04146	IAA-Leu	2.74554	up	N-(3-Indolylacetyl)-L-leucine	--	--	0.803081	6.00182e-05	3
Cluster-114186.0	2.18823	up	--	--	IAA-Leu	2.74554	up	N-(3-Indolylacetyl)-L-leucine	--	--	0.81636	3.59054e-05	3
Cluster-114233.3	5.43498	up	K02872	ko03010	IAA-Leu	2.74554	up	N-(3-Indolylacetyl)-L-leucine	--	--	0.819025	3.22299e-05	3
Cluster-114330.0	2.62499	up	--	--	IAA-Leu	2.74554	up	N-(3-Indolylacetyl)-L-leucine	--	--	0.84405	1.06535e-05	3
Cluster-114408.2	6.89559	up	--	--	IAA-Leu	2.74554	up	N-(3-Indolylacetyl)-L-leucine	--	--	0.802163	6.20995e-05	3
Cluster-114571.11	8.85384	up	--	--	IAA-Leu	2.74554	up	N-(3-Indolylacetyl)-L-leucine	--	--	0.826661	2.34211e-05	3
Cluster-114578.5	6.70194	up	--	--	IAA-Leu	2.74554	up	N-(3-Indolylacetyl)-L-leucine	--	--	0.811364	4.37645e-05	3
Cluster-114578.7	1.26755	up	--	--	IAA-Leu	2.74554	up	N-(3-Indolylacetyl)-L-leucine	--	--	0.844951	1.02016e-05	3
Cluster-114672.0	8.64105	up	--	--	IAA-Leu	2.74554	up	N-(3-Indolylacetyl)-L-leucine	--	--	0.854208	6.42852e-06	3
Cluster-114747.1	4.2883	insig	--	--	IAA-Leu	2.74554	up	N-(3-Indolylacetyl)-L-leucine	--	--	0.882385	1.26527e-06	3
Cluster-114891.4	6.87349	up	--	--	IAA-Leu	2.74554	up	N-(3-Indolylacetyl)-L-leucine	--	--	0.828826	2.13347e-05	3
Cluster-115170.2	6.00698	up	--	--	IAA-Leu	2.74554	up	N-(3-Indolylacetyl)-L-leucine	--	--	0.840403	1.26635e-05	3
Cluster-115217.4	10.4554	up	K00083	ko00940,ko01100,ko01110	IAA-Leu	2.74554	up	N-(3-Indolylacetyl)-L-leucine	--	--	0.809395	4.72402e-05	3
Cluster-115277.0	7.75236	up	--	--	IAA-Leu	2.74554	up	N-(3-Indolylacetyl)-L-leucine	--	--	0.806997	5.17896e-05	3
Cluster-115360.0	5.39884	up	K10728	ko03440	IAA-Leu	2.74554	up	N-(3-Indolylacetyl)-L-leucine	--	--	0.842344	1.15565e-05	3
Cluster-115469.1	2.63211	up	--	--	IAA-Leu	2.74554	up	N-(3-Indolylacetyl)-L-leucine	--	--	0.872645	2.31601e-06	3
Cluster-115600.1	4.2147	up	--	--	IAA-Leu	2.74554	up	N-(3-Indolylacetyl)-L-leucine	--	--	0.807511	5.07843e-05	3
Cluster-115603.103	10.2979	up	--	--	IAA-Leu	2.74554	up	N-(3-Indolylacetyl)-L-leucine	--	--	0.8026	6.11022e-05	3
Cluster-115669.3	1.36102	up	K03787	ko00230,ko00240,ko00760,ko01100,ko01110,ko01232	IAA-Leu	2.74554	up	N-(3-Indolylacetyl)-L-leucine	--	--	0.832295	1.83222e-05	3
Cluster-115791.10	8.50162	up	K13448	ko04626	IAA-Leu	2.74554	up	N-(3-Indolylacetyl)-L-leucine	--	--	0.836116	1.54329e-05	3
Cluster-115841.9	2.12736	insig	--	--	IAA-Leu	2.74554	up	N-(3-Indolylacetyl)-L-leucine	--	--	0.805339	5.51475e-05	3
Cluster-116131.4	10.1408	up	--	--	IAA-Leu	2.74554	up	N-(3-Indolylacetyl)-L-leucine	--	--	0.835498	1.58714e-05	3
Cluster-116131.5	10.1063	up	--	--	IAA-Leu	2.74554	up	N-(3-Indolylacetyl)-L-leucine	--	--	0.824052	2.6165e-05	3
Cluster-116131.6	8.27831	up	--	--	IAA-Leu	2.74554	up	N-(3-Indolylacetyl)-L-leucine	--	--	0.835428	1.59222e-05	3
Cluster-116299.3	7.55966	up	--	--	IAA-Leu	2.74554	up	N-(3-Indolylacetyl)-L-leucine	--	--	0.813487	4.0262e-05	3
Cluster-116630.5	8.88528	up	--	--	IAA-Leu	2.74554	up	N-(3-Indolylacetyl)-L-leucine	--	--	0.827394	2.2696e-05	3
Cluster-116850.3	7.5972	up	--	--	IAA-Leu	2.74554	up	N-(3-Indolylacetyl)-L-leucine	--	--	0.847456	9.03016e-06	3
Cluster-117022.6	8.32968	up	--	--	IAA-Leu	2.74554	up	N-(3-Indolylacetyl)-L-leucine	--	--	0.855957	5.87068e-06	3
Cluster-117145.5	1.98238	up	--	--	IAA-Leu	2.74554	up	N-(3-Indolylacetyl)-L-leucine	--	--	0.844062	1.06476e-05	3
Cluster-117579.0	1.05689	up	K13416	ko04016,ko04075,ko04626	IAA-Leu	2.74554	up	N-(3-Indolylacetyl)-L-leucine	--	--	0.961537	2.13452e-10	3
Cluster-117631.0	1.17882	up	--	--	IAA-Leu	2.74554	up	N-(3-Indolylacetyl)-L-leucine	--	--	0.816394	3.58571e-05	3
Cluster-117659.6	6.91654	up	--	--	IAA-Leu	2.74554	up	N-(3-Indolylacetyl)-L-leucine	--	--	0.815145	3.7697e-05	3
Cluster-117704.3	1.28318	up	K24221	ko00562,ko01100	IAA-Leu	2.74554	up	N-(3-Indolylacetyl)-L-leucine	--	--	0.859299	4.91959e-06	3
Cluster-117704.7	1.25935	up	K24221	ko00562,ko01100	IAA-Leu	2.74554	up	N-(3-Indolylacetyl)-L-leucine	--	--	0.841512	1.20206e-05	3
Cluster-117766.0	4.12051	up	K14488	ko04075	IAA-Leu	2.74554	up	N-(3-Indolylacetyl)-L-leucine	--	--	0.856067	5.83695e-06	3
Cluster-117766.1	1.09173	up	K14488	ko04075	IAA-Leu	2.74554	up	N-(3-Indolylacetyl)-L-leucine	--	--	0.887986	8.72142e-07	3
Cluster-117793.7	7.46965	up	K13459	ko04626	IAA-Leu	2.74554	up	N-(3-Indolylacetyl)-L-leucine	--	--	0.826671	2.34105e-05	3
Cluster-117946.0	1.70018	up	K06129	ko00564	IAA-Leu	2.74554	up	N-(3-Indolylacetyl)-L-leucine	--	--	0.822248	2.82184e-05	3
Cluster-117977.0	3.0299	up	--	--	IAA-Leu	2.74554	up	N-(3-Indolylacetyl)-L-leucine	--	--	0.907512	2.00741e-07	3
Cluster-118157.4	11.7135	up	--	--	IAA-Leu	2.74554	up	N-(3-Indolylacetyl)-L-leucine	--	--	0.804875	5.61193e-05	3
Cluster-118211.3	1.85337	up	--	--	IAA-Leu	2.74554	up	N-(3-Indolylacetyl)-L-leucine	--	--	0.800702	6.55396e-05	3
Cluster-118268.13	7.86816	up	--	--	IAA-Leu	2.74554	up	N-(3-Indolylacetyl)-L-leucine	--	--	0.8339	1.70564e-05	3
Cluster-118393.1	2.43128	up	--	--	IAA-Leu	2.74554	up	N-(3-Indolylacetyl)-L-leucine	--	--	0.806609	5.25579e-05	3
Cluster-118499.27	1.6656	up	--	--	IAA-Leu	2.74554	up	N-(3-Indolylacetyl)-L-leucine	--	--	0.813304	4.05545e-05	3
Cluster-118499.3	1.43436	up	--	--	IAA-Leu	2.74554	up	N-(3-Indolylacetyl)-L-leucine	--	--	0.864983	3.6041e-06	3
Cluster-118567.0	1.05669	up	--	--	IAA-Leu	2.74554	up	N-(3-Indolylacetyl)-L-leucine	--	--	0.852633	6.96911e-06	3
Cluster-118818.0	2.41334	up	K09839	ko00906,ko01100,ko01110	IAA-Leu	2.74554	up	N-(3-Indolylacetyl)-L-leucine	--	--	0.802472	6.13925e-05	3
Cluster-118819.6	4.74735	up	K12811	ko03040	IAA-Leu	2.74554	up	N-(3-Indolylacetyl)-L-leucine	--	--	0.879936	1.48012e-06	3
Cluster-119050.1	5.40248	up	--	--	IAA-Leu	2.74554	up	N-(3-Indolylacetyl)-L-leucine	--	--	0.801814	6.29065e-05	3
Cluster-119074.2	1.46433	up	K17872	ko00130,ko01100,ko01110,ko01240	IAA-Leu	2.74554	up	N-(3-Indolylacetyl)-L-leucine	--	--	0.873098	2.25426e-06	3
Cluster-119311.0	4.76033	up	--	--	IAA-Leu	2.74554	up	N-(3-Indolylacetyl)-L-leucine	--	--	0.803976	5.80457e-05	3
Cluster-119421.7	8.52621	up	--	--	IAA-Leu	2.74554	up	N-(3-Indolylacetyl)-L-leucine	--	--	0.810004	4.61402e-05	3
Cluster-11948.4	6.08447	up	--	--	IAA-Leu	2.74554	up	N-(3-Indolylacetyl)-L-leucine	--	--	0.835468	1.58935e-05	3
Cluster-119533.12	8.24732	up	--	--	IAA-Leu	2.74554	up	N-(3-Indolylacetyl)-L-leucine	--	--	0.818485	3.29481e-05	3
Cluster-119535.0	9.58729	up	K03860	ko00563,ko01100	IAA-Leu	2.74554	up	N-(3-Indolylacetyl)-L-leucine	--	--	0.826905	2.3177e-05	3
Cluster-119548.0	8.61237	up	K00975	ko00500,ko00520,ko01100,ko01110,ko01250	IAA-Leu	2.74554	up	N-(3-Indolylacetyl)-L-leucine	--	--	0.809623	4.68256e-05	3
Cluster-119548.4	8.96753	up	K00975	ko00500,ko00520,ko01100,ko01110,ko01250	IAA-Leu	2.74554	up	N-(3-Indolylacetyl)-L-leucine	--	--	0.81316	4.07861e-05	3
Cluster-119663.6	11.6308	up	--	--	IAA-Leu	2.74554	up	N-(3-Indolylacetyl)-L-leucine	--	--	0.836877	1.49066e-05	3
Cluster-119689.1	5.26017	up	K00700	ko00500,ko01100,ko01110	IAA-Leu	2.74554	up	N-(3-Indolylacetyl)-L-leucine	--	--	0.819828	3.11876e-05	3
Cluster-119753.1	8.42824	up	--	--	IAA-Leu	2.74554	up	N-(3-Indolylacetyl)-L-leucine	--	--	0.812075	4.25641e-05	3
Cluster-119756.12	2.38051	up	K14411	ko03015	IAA-Leu	2.74554	up	N-(3-Indolylacetyl)-L-leucine	--	--	0.861254	4.42708e-06	3
Cluster-119756.27	2.56876	up	--	--	IAA-Leu	2.74554	up	N-(3-Indolylacetyl)-L-leucine	--	--	0.830378	1.99383e-05	3
Cluster-119756.6	11.6856	up	--	--	IAA-Leu	2.74554	up	N-(3-Indolylacetyl)-L-leucine	--	--	0.800351	6.63908e-05	3
Cluster-119756.7	8.54562	up	K14411	ko03015	IAA-Leu	2.74554	up	N-(3-Indolylacetyl)-L-leucine	--	--	0.916638	9.00454e-08	3
Cluster-119816.1	3.34248	up	--	--	IAA-Leu	2.74554	up	N-(3-Indolylacetyl)-L-leucine	--	--	0.814593	3.85341e-05	3
Cluster-119836.0	1.33389	up	--	--	IAA-Leu	2.74554	up	N-(3-Indolylacetyl)-L-leucine	--	--	0.919926	6.59546e-08	3
Cluster-120211.9	4.41222	up	--	--	IAA-Leu	2.74554	up	N-(3-Indolylacetyl)-L-leucine	--	--	0.8741	2.12279e-06	3
Cluster-120280.3	2.05102	up	--	--	IAA-Leu	2.74554	up	N-(3-Indolylacetyl)-L-leucine	--	--	0.803819	5.83878e-05	3
Cluster-120368.4	3.58487	up	--	--	IAA-Leu	2.74554	up	N-(3-Indolylacetyl)-L-leucine	--	--	0.822452	2.79787e-05	3
Cluster-120479.0	2.11197	up	--	--	IAA-Leu	2.74554	up	N-(3-Indolylacetyl)-L-leucine	--	--	0.874294	2.09804e-06	3
Cluster-120517.7	10.0785	up	K01723	ko00592,ko01100,ko01110	IAA-Leu	2.74554	up	N-(3-Indolylacetyl)-L-leucine	--	--	0.841991	1.17518e-05	3
Cluster-120545.0	1.39819	up	--	--	IAA-Leu	2.74554	up	N-(3-Indolylacetyl)-L-leucine	--	--	0.913661	1.18089e-07	3
Cluster-120600.1	7.73832	up	--	--	IAA-Leu	2.74554	up	N-(3-Indolylacetyl)-L-leucine	--	--	0.857189	5.50315e-06	3
Cluster-120716.0	7.89763	up	K00430	ko00940,ko01100,ko01110	IAA-Leu	2.74554	up	N-(3-Indolylacetyl)-L-leucine	--	--	0.811698	4.3196e-05	3
Cluster-120805.0	11.2019	up	K00688	ko00500,ko01100,ko01110	IAA-Leu	2.74554	up	N-(3-Indolylacetyl)-L-leucine	--	--	0.805268	5.52963e-05	3
Cluster-120805.3	6.79681	up	K00688	ko00500,ko01100,ko01110	IAA-Leu	2.74554	up	N-(3-Indolylacetyl)-L-leucine	--	--	0.8079	5.00345e-05	3
Cluster-120806.0	2.4282	up	K12882	ko03013,ko03015,ko03040	IAA-Leu	2.74554	up	N-(3-Indolylacetyl)-L-leucine	--	--	0.810102	4.59654e-05	3
Cluster-120856.1	3.16623	up	--	--	IAA-Leu	2.74554	up	N-(3-Indolylacetyl)-L-leucine	--	--	0.819983	3.09893e-05	3
Cluster-120856.3	6.7136	up	--	--	IAA-Leu	2.74554	up	N-(3-Indolylacetyl)-L-leucine	--	--	0.820661	3.01368e-05	3
Cluster-120890.3	7.95011	up	--	--	IAA-Leu	2.74554	up	N-(3-Indolylacetyl)-L-leucine	--	--	0.839278	1.33455e-05	3
Cluster-120958.0	1.69921	up	--	--	IAA-Leu	2.74554	up	N-(3-Indolylacetyl)-L-leucine	--	--	0.802284	6.18228e-05	3
Cluster-120983.0	5.71068	up	K15397	ko00062,ko01100,ko01110,ko04626	IAA-Leu	2.74554	up	N-(3-Indolylacetyl)-L-leucine	--	--	0.913878	1.15819e-07	3
Cluster-121301.3	7.24048	up	--	--	IAA-Leu	2.74554	up	N-(3-Indolylacetyl)-L-leucine	--	--	0.802708	6.08564e-05	3
Cluster-121309.2	10.3538	up	K00611	ko00220,ko01100,ko01110,ko01230	IAA-Leu	2.74554	up	N-(3-Indolylacetyl)-L-leucine	--	--	0.807898	5.00387e-05	3
Cluster-121323.39	1.197	up	--	--	IAA-Leu	2.74554	up	N-(3-Indolylacetyl)-L-leucine	--	--	0.805702	5.43964e-05	3
Cluster-121394.0	7.8213	up	K12191	ko04144	IAA-Leu	2.74554	up	N-(3-Indolylacetyl)-L-leucine	--	--	0.817077	3.4884e-05	3
Cluster-121440.1	1.74036	up	--	--	IAA-Leu	2.74554	up	N-(3-Indolylacetyl)-L-leucine	--	--	0.804229	5.74978e-05	3
Cluster-121868.3	10.1964	up	--	--	IAA-Leu	2.74554	up	N-(3-Indolylacetyl)-L-leucine	--	--	0.827711	2.23877e-05	3
Cluster-122003.20	1.41453	up	K13506	ko00561,ko00564,ko01100,ko01110	IAA-Leu	2.74554	up	N-(3-Indolylacetyl)-L-leucine	--	--	0.891196	6.98438e-07	3
Cluster-122075.3	1.50787	up	K09753	ko00940,ko01100,ko01110	IAA-Leu	2.74554	up	N-(3-Indolylacetyl)-L-leucine	--	--	0.87693	1.78626e-06	3
Cluster-122220.1	8.40909	up	--	--	IAA-Leu	2.74554	up	N-(3-Indolylacetyl)-L-leucine	--	--	0.801112	6.45583e-05	3
Cluster-122220.7	11.182	up	--	--	IAA-Leu	2.74554	up	N-(3-Indolylacetyl)-L-leucine	--	--	0.857258	5.48323e-06	3
Cluster-122424.4	1.74121	up	--	--	IAA-Leu	2.74554	up	N-(3-Indolylacetyl)-L-leucine	--	--	0.897105	4.5548e-07	3
Cluster-122497.4	7.87888	up	K01114	ko00562,ko00564,ko00565,ko01100,ko01110	IAA-Leu	2.74554	up	N-(3-Indolylacetyl)-L-leucine	--	--	0.810022	4.61085e-05	3
Cluster-122517.0	4.71271	up	--	--	IAA-Leu	2.74554	up	N-(3-Indolylacetyl)-L-leucine	--	--	0.898965	3.96011e-07	3
Cluster-122544.3	1.90489	up	K14503	ko04075	IAA-Leu	2.74554	up	N-(3-Indolylacetyl)-L-leucine	--	--	0.851253	7.47437e-06	3
Cluster-122572.0	4.26718	up	K15397	ko00062,ko01100,ko01110,ko04626	IAA-Leu	2.74554	up	N-(3-Indolylacetyl)-L-leucine	--	--	0.892746	6.25804e-07	3
Cluster-122572.2	3.15281	up	K15397	ko00062,ko01100,ko01110,ko04626	IAA-Leu	2.74554	up	N-(3-Indolylacetyl)-L-leucine	--	--	0.871426	2.48941e-06	3
Cluster-122625.0	1.87833	up	K13415	ko04075	IAA-Leu	2.74554	up	N-(3-Indolylacetyl)-L-leucine	--	--	0.835549	1.58349e-05	3
Cluster-122744.13	7.82303	up	--	--	IAA-Leu	2.74554	up	N-(3-Indolylacetyl)-L-leucine	--	--	0.832003	1.85611e-05	3
Cluster-122744.9	7.05357	up	--	--	IAA-Leu	2.74554	up	N-(3-Indolylacetyl)-L-leucine	--	--	0.824801	2.53505e-05	3
Cluster-122982.2	3.10103	up	--	--	IAA-Leu	2.74554	up	N-(3-Indolylacetyl)-L-leucine	--	--	0.842332	1.15636e-05	3
Cluster-123128.1	1.98414	up	K14423	ko00100,ko01100,ko01110	IAA-Leu	2.74554	up	N-(3-Indolylacetyl)-L-leucine	--	--	0.876853	1.79478e-06	3
Cluster-123374.0	1.33218	up	K00083	ko00940,ko01100,ko01110	IAA-Leu	2.74554	up	N-(3-Indolylacetyl)-L-leucine	--	--	0.903384	2.80894e-07	3
Cluster-123377.0	1.49981	up	--	--	IAA-Leu	2.74554	up	N-(3-Indolylacetyl)-L-leucine	--	--	0.84713	9.17566e-06	3
Cluster-123672.1	9.01928	up	--	--	IAA-Leu	2.74554	up	N-(3-Indolylacetyl)-L-leucine	--	--	0.804193	5.75754e-05	3
Cluster-123751.2	10.119	up	--	--	IAA-Leu	2.74554	up	N-(3-Indolylacetyl)-L-leucine	--	--	0.825024	2.51114e-05	3
Cluster-123758.2	8.12563	up	--	--	IAA-Leu	2.74554	up	N-(3-Indolylacetyl)-L-leucine	--	--	0.813038	4.0983e-05	3
Cluster-123773.1	8.03175	up	K16818	ko00564,ko00592,ko01100,ko01110	IAA-Leu	2.74554	up	N-(3-Indolylacetyl)-L-leucine	--	--	0.819965	3.10133e-05	3
Cluster-123773.3	11.05	up	K16818	ko00564,ko00592,ko01100,ko01110	IAA-Leu	2.74554	up	N-(3-Indolylacetyl)-L-leucine	--	--	0.83634	1.52762e-05	3
Cluster-12383.4	1.16864	up	K14497	ko04016,ko04075	IAA-Leu	2.74554	up	N-(3-Indolylacetyl)-L-leucine	--	--	0.842899	1.12561e-05	3
Cluster-12383.42	6.49519	up	K14006	ko04141	IAA-Leu	2.74554	up	N-(3-Indolylacetyl)-L-leucine	--	--	0.839495	1.3211e-05	3
Cluster-123939.0	1.45686	up	K10756	ko03030,ko03420,ko03430	IAA-Leu	2.74554	up	N-(3-Indolylacetyl)-L-leucine	--	--	0.863372	3.94184e-06	3
Cluster-123951.4	1.21409	up	K12604	ko03018	IAA-Leu	2.74554	up	N-(3-Indolylacetyl)-L-leucine	--	--	0.817468	3.43369e-05	3
Cluster-124268.3	3.02576	up	--	--	IAA-Leu	2.74554	up	N-(3-Indolylacetyl)-L-leucine	--	--	0.827456	2.26354e-05	3
Cluster-124330.4	9.28458	up	--	--	IAA-Leu	2.74554	up	N-(3-Indolylacetyl)-L-leucine	--	--	0.804036	5.7914e-05	3
Cluster-124430.0	1.61573	up	K01176	ko00500,ko01100,ko01110	IAA-Leu	2.74554	up	N-(3-Indolylacetyl)-L-leucine	--	--	0.885167	1.05429e-06	3
Cluster-124435.0	2.19258	up	--	--	IAA-Leu	2.74554	up	N-(3-Indolylacetyl)-L-leucine	--	--	0.800976	6.48825e-05	3
Cluster-124539.7	8.21577	up	K02880	ko03010	IAA-Leu	2.74554	up	N-(3-Indolylacetyl)-L-leucine	--	--	0.802098	6.22488e-05	3
Cluster-124744.1	7.18087	up	K12823	ko03040	IAA-Leu	2.74554	up	N-(3-Indolylacetyl)-L-leucine	--	--	0.806247	5.32857e-05	3
Cluster-124804.3	7.02511	up	--	--	IAA-Leu	2.74554	up	N-(3-Indolylacetyl)-L-leucine	--	--	0.80858	4.87458e-05	3
Cluster-124848.1	1.63515	up	K02434	ko00970,ko01100	IAA-Leu	2.74554	up	N-(3-Indolylacetyl)-L-leucine	--	--	0.813772	3.98112e-05	3
Cluster-124850.2	8.10174	up	K10569	ko03410	IAA-Leu	2.74554	up	N-(3-Indolylacetyl)-L-leucine	--	--	0.811692	4.32076e-05	3
Cluster-124955.1	3.37408	up	K19891	ko00500,ko01100	IAA-Leu	2.74554	up	N-(3-Indolylacetyl)-L-leucine	--	--	0.825846	2.42502e-05	3
Cluster-124988.0	4.04162	up	K00895	ko00010,ko00030,ko00051,ko01100,ko01110	IAA-Leu	2.74554	up	N-(3-Indolylacetyl)-L-leucine	--	--	0.807499	5.08076e-05	3
Cluster-125016.0	6.8704	up	K05657	ko02010	IAA-Leu	2.74554	up	N-(3-Indolylacetyl)-L-leucine	--	--	0.803772	5.84895e-05	3
Cluster-125128.2	5.07624	up	K11153	ko01100,ko01240	IAA-Leu	2.74554	up	N-(3-Indolylacetyl)-L-leucine	--	--	0.868598	2.93533e-06	3
Cluster-125153.2	1.96758	up	--	--	IAA-Leu	2.74554	up	N-(3-Indolylacetyl)-L-leucine	--	--	0.812091	4.25373e-05	3
Cluster-125218.0	1.96379	up	--	--	IAA-Leu	2.74554	up	N-(3-Indolylacetyl)-L-leucine	--	--	0.881148	1.37015e-06	3
Cluster-125218.1	2.07172	up	--	--	IAA-Leu	2.74554	up	N-(3-Indolylacetyl)-L-leucine	--	--	0.936312	1.11331e-08	3
Cluster-125231.1	10.3557	up	--	--	IAA-Leu	2.74554	up	N-(3-Indolylacetyl)-L-leucine	--	--	0.828445	2.169e-05	3
Cluster-125285.10	1.42733	up	--	--	IAA-Leu	2.74554	up	N-(3-Indolylacetyl)-L-leucine	--	--	0.84781	8.87394e-06	3
Cluster-125285.14	8.66316	up	--	--	IAA-Leu	2.74554	up	N-(3-Indolylacetyl)-L-leucine	--	--	0.816608	3.55498e-05	3
Cluster-125285.4	9.07201	up	--	--	IAA-Leu	2.74554	up	N-(3-Indolylacetyl)-L-leucine	--	--	0.802031	6.2404e-05	3
Cluster-125311.5	2.49417	up	K08916	ko00196,ko01100	IAA-Leu	2.74554	up	N-(3-Indolylacetyl)-L-leucine	--	--	0.801781	6.29838e-05	3
Cluster-125371.1	1.52086	up	K01872	ko00970	IAA-Leu	2.74554	up	N-(3-Indolylacetyl)-L-leucine	--	--	0.812576	4.17346e-05	3
Cluster-125371.9	1.31799	up	K01872	ko00970	IAA-Leu	2.74554	up	N-(3-Indolylacetyl)-L-leucine	--	--	0.820498	3.03399e-05	3
Cluster-125428.0	1.01454	up	--	--	IAA-Leu	2.74554	up	N-(3-Indolylacetyl)-L-leucine	--	--	0.839563	1.31698e-05	3
Cluster-125685.9	5.28491	up	K02879	ko03010	IAA-Leu	2.74554	up	N-(3-Indolylacetyl)-L-leucine	--	--	0.804847	5.61784e-05	3
Cluster-125795.0	4.58081	up	--	--	IAA-Leu	2.74554	up	N-(3-Indolylacetyl)-L-leucine	--	--	0.805878	5.40361e-05	3
Cluster-125911.7	10.758	up	K13459	ko04626	IAA-Leu	2.74554	up	N-(3-Indolylacetyl)-L-leucine	--	--	0.834097	1.69066e-05	3
Cluster-126005.0	1.78982	up	--	--	IAA-Leu	2.74554	up	N-(3-Indolylacetyl)-L-leucine	--	--	0.901436	3.27458e-07	3
Cluster-126058.2	7.74636	up	--	--	IAA-Leu	2.74554	up	N-(3-Indolylacetyl)-L-leucine	--	--	0.819525	3.1577e-05	3
Cluster-126099.3	2.82636	up	--	--	IAA-Leu	2.74554	up	N-(3-Indolylacetyl)-L-leucine	--	--	0.801707	6.31559e-05	3
Cluster-126142.4	9.24309	up	K01593	ko00350,ko00360,ko00380,ko00901,ko00950,ko00965,ko01100,ko01110	IAA-Leu	2.74554	up	N-(3-Indolylacetyl)-L-leucine	--	--	0.803958	5.8084e-05	3
Cluster-126204.7	9.04779	up	K12603	ko03018	IAA-Leu	2.74554	up	N-(3-Indolylacetyl)-L-leucine	--	--	0.825186	2.49403e-05	3
Cluster-126551.3	1.71702	up	--	--	IAA-Leu	2.74554	up	N-(3-Indolylacetyl)-L-leucine	--	--	0.843683	1.08426e-05	3
Cluster-126627.8	1.33181	up	--	--	IAA-Leu	2.74554	up	N-(3-Indolylacetyl)-L-leucine	--	--	0.806062	5.36599e-05	3
Cluster-126777.7	9.30217	up	K01183	ko00520,ko01100	IAA-Leu	2.74554	up	N-(3-Indolylacetyl)-L-leucine	--	--	0.843102	1.11478e-05	3
Cluster-126914.4	2.33768	up	K03097	ko03008,ko04712	IAA-Leu	2.74554	up	N-(3-Indolylacetyl)-L-leucine	--	--	0.838011	1.41504e-05	3
Cluster-126952.0	1.72579	up	--	--	IAA-Leu	2.74554	up	N-(3-Indolylacetyl)-L-leucine	--	--	0.850681	7.69295e-06	3
Cluster-127292.0	3.51278	up	--	--	IAA-Leu	2.74554	up	N-(3-Indolylacetyl)-L-leucine	--	--	0.818377	3.30932e-05	3
Cluster-127848.1	1.25055	up	K01835	ko00010,ko00030,ko00052,ko00230,ko00500,ko00520,ko01100,ko01110,ko01250	IAA-Leu	2.74554	up	N-(3-Indolylacetyl)-L-leucine	--	--	0.805034	5.57858e-05	3
Cluster-127978.3	1.13061	up	K13415	ko04075	IAA-Leu	2.74554	up	N-(3-Indolylacetyl)-L-leucine	--	--	0.866828	3.24813e-06	3
Cluster-128008.2	2.21591	up	K01488	ko00230,ko01100,ko01232	IAA-Leu	2.74554	up	N-(3-Indolylacetyl)-L-leucine	--	--	0.852274	7.09778e-06	3
Cluster-128022.4	9.05351	up	--	--	IAA-Leu	2.74554	up	N-(3-Indolylacetyl)-L-leucine	--	--	0.815555	3.70839e-05	3
Cluster-128092.6	1.87449	up	--	--	IAA-Leu	2.74554	up	N-(3-Indolylacetyl)-L-leucine	--	--	0.831394	1.90675e-05	3
Cluster-128115.38	9.49184	up	K13993	ko04141	IAA-Leu	2.74554	up	N-(3-Indolylacetyl)-L-leucine	--	--	0.869274	2.82297e-06	3
Cluster-128115.39	11.5881	up	K13993	ko04141	IAA-Leu	2.74554	up	N-(3-Indolylacetyl)-L-leucine	--	--	0.845426	9.96999e-06	3
Cluster-128115.43	3.47757	up	K13993	ko04141	IAA-Leu	2.74554	up	N-(3-Indolylacetyl)-L-leucine	--	--	0.80413	5.77113e-05	3
Cluster-128115.56	12.8169	up	K13993	ko04141	IAA-Leu	2.74554	up	N-(3-Indolylacetyl)-L-leucine	--	--	0.811766	4.30811e-05	3
Cluster-128129.3	9.47474	up	K10683	ko03440	IAA-Leu	2.74554	up	N-(3-Indolylacetyl)-L-leucine	--	--	0.816951	3.50614e-05	3
Cluster-128129.6	10.0624	up	K10683	ko03440	IAA-Leu	2.74554	up	N-(3-Indolylacetyl)-L-leucine	--	--	0.816081	3.63096e-05	3
Cluster-128176.0	6.51256	up	--	--	IAA-Leu	2.74554	up	N-(3-Indolylacetyl)-L-leucine	--	--	0.821859	2.86783e-05	3
Cluster-128260.3	1.03328	up	--	--	IAA-Leu	2.74554	up	N-(3-Indolylacetyl)-L-leucine	--	--	0.811417	4.36732e-05	3
Cluster-128281.1	5.52223	up	K01728	ko00040,ko01100	IAA-Leu	2.74554	up	N-(3-Indolylacetyl)-L-leucine	--	--	0.844253	1.05501e-05	3
Cluster-128281.5	1.87095	up	K01728	ko00040,ko01100	IAA-Leu	2.74554	up	N-(3-Indolylacetyl)-L-leucine	--	--	0.823834	2.64051e-05	3
Cluster-128310.3	1.57848	up	--	--	IAA-Leu	2.74554	up	N-(3-Indolylacetyl)-L-leucine	--	--	0.857951	5.28591e-06	3
Cluster-128310.4	1.36788	up	--	--	IAA-Leu	2.74554	up	N-(3-Indolylacetyl)-L-leucine	--	--	0.810036	4.60836e-05	3
Cluster-128333.0	7.52055	up	--	--	IAA-Leu	2.74554	up	N-(3-Indolylacetyl)-L-leucine	--	--	0.844586	1.03824e-05	3
Cluster-128333.5	11.7556	up	K03860	ko00563,ko01100	IAA-Leu	2.74554	up	N-(3-Indolylacetyl)-L-leucine	--	--	0.823657	2.66023e-05	3
Cluster-128421.16	1.59871	up	--	--	IAA-Leu	2.74554	up	N-(3-Indolylacetyl)-L-leucine	--	--	0.852378	7.06012e-06	3
Cluster-128463.5	2.70194	insig	--	--	IAA-Leu	2.74554	up	N-(3-Indolylacetyl)-L-leucine	--	--	0.828029	2.20829e-05	3
Cluster-128856.3	10.9957	up	K13415	ko04075	IAA-Leu	2.74554	up	N-(3-Indolylacetyl)-L-leucine	--	--	0.830572	1.97698e-05	3
Cluster-128858.0	4.18822	up	--	--	IAA-Leu	2.74554	up	N-(3-Indolylacetyl)-L-leucine	--	--	0.804346	5.72454e-05	3
Cluster-128858.2	3.1592	up	--	--	IAA-Leu	2.74554	up	N-(3-Indolylacetyl)-L-leucine	--	--	0.830054	2.02232e-05	3
Cluster-128877.3	1.10617	up	K05658	ko02010	IAA-Leu	2.74554	up	N-(3-Indolylacetyl)-L-leucine	--	--	0.872078	2.39534e-06	3
Cluster-128905.11	2.91433	up	--	--	IAA-Leu	2.74554	up	N-(3-Indolylacetyl)-L-leucine	--	--	0.875355	1.96732e-06	3
Cluster-128905.9	1.94239	up	--	--	IAA-Leu	2.74554	up	N-(3-Indolylacetyl)-L-leucine	--	--	0.879427	1.52849e-06	3
Cluster-129095.7	6.30077	up	--	--	IAA-Leu	2.74554	up	N-(3-Indolylacetyl)-L-leucine	--	--	0.816762	3.53299e-05	3
Cluster-129114.0	2.84127	up	K13606	ko00860,ko01100,ko01110	IAA-Leu	2.74554	up	N-(3-Indolylacetyl)-L-leucine	--	--	0.86673	3.26612e-06	3
Cluster-129152.12	3.74456	up	--	--	IAA-Leu	2.74554	up	N-(3-Indolylacetyl)-L-leucine	--	--	0.830746	1.96191e-05	3
Cluster-129152.5	8.66833	up	--	--	IAA-Leu	2.74554	up	N-(3-Indolylacetyl)-L-leucine	--	--	0.809544	4.69694e-05	3
Cluster-129152.6	1.60923	up	--	--	IAA-Leu	2.74554	up	N-(3-Indolylacetyl)-L-leucine	--	--	0.875754	1.91997e-06	3
Cluster-129199.1	3.36919	up	--	--	IAA-Leu	2.74554	up	N-(3-Indolylacetyl)-L-leucine	--	--	0.819578	3.15088e-05	3
Cluster-129352.2	8.02531	up	K00679	ko00561,ko01100	IAA-Leu	2.74554	up	N-(3-Indolylacetyl)-L-leucine	--	--	0.86708	3.20186e-06	3
Cluster-129352.5	4.70839	up	K00679	ko00561,ko01100	IAA-Leu	2.74554	up	N-(3-Indolylacetyl)-L-leucine	--	--	0.955657	6.53881e-10	3
Cluster-12940.7	1.17426	up	--	--	IAA-Leu	2.74554	up	N-(3-Indolylacetyl)-L-leucine	--	--	0.89137	6.89908e-07	3
Cluster-12940.8	10.548	up	--	--	IAA-Leu	2.74554	up	N-(3-Indolylacetyl)-L-leucine	--	--	0.807096	5.1595e-05	3
Cluster-129412.5	7.51589	up	--	--	IAA-Leu	2.74554	up	N-(3-Indolylacetyl)-L-leucine	--	--	0.802178	6.20663e-05	3
Cluster-129668.10	2.73535	insig	K19891	ko00500,ko01100	IAA-Leu	2.74554	up	N-(3-Indolylacetyl)-L-leucine	--	--	0.808683	4.85545e-05	3
Cluster-129714.2	1.88669	up	K08101	ko00860,ko01110	IAA-Leu	2.74554	up	N-(3-Indolylacetyl)-L-leucine	--	--	0.858514	5.13018e-06	3
Cluster-129718.0	2.54483	up	K23095	ko00130,ko01100,ko01110,ko01240	IAA-Leu	2.74554	up	N-(3-Indolylacetyl)-L-leucine	--	--	0.880092	1.46552e-06	3
Cluster-129778.4	1.32177	up	K10258	ko00062,ko01040,ko01100,ko01110,ko01212	IAA-Leu	2.74554	up	N-(3-Indolylacetyl)-L-leucine	--	--	0.857788	5.3316e-06	3
Cluster-129909.53	7.5789	up	--	--	IAA-Leu	2.74554	up	N-(3-Indolylacetyl)-L-leucine	--	--	0.805303	5.52217e-05	3
Cluster-130153.1	1.14607	up	--	--	IAA-Leu	2.74554	up	N-(3-Indolylacetyl)-L-leucine	--	--	0.803998	5.79984e-05	3
Cluster-130220.3	7.76247	up	K13436	ko04626	IAA-Leu	2.74554	up	N-(3-Indolylacetyl)-L-leucine	--	--	0.837581	1.44331e-05	3
Cluster-130220.6	3.46608	up	K13436	ko04626	IAA-Leu	2.74554	up	N-(3-Indolylacetyl)-L-leucine	--	--	0.889521	7.84941e-07	3
Cluster-130283.9	2.75933	insig	K10206	ko00300,ko01100,ko01110,ko01230	IAA-Leu	2.74554	up	N-(3-Indolylacetyl)-L-leucine	--	--	0.87202	2.40361e-06	3
Cluster-130295.5	10.3012	up	K19355	ko00051,ko01100	IAA-Leu	2.74554	up	N-(3-Indolylacetyl)-L-leucine	--	--	0.813034	4.09882e-05	3
Cluster-130295.6	10.0473	up	K19355	ko00051,ko01100	IAA-Leu	2.74554	up	N-(3-Indolylacetyl)-L-leucine	--	--	0.81501	3.79003e-05	3
Cluster-130303.4	4.34728	up	--	--	IAA-Leu	2.74554	up	N-(3-Indolylacetyl)-L-leucine	--	--	0.816894	3.5142e-05	3
Cluster-130459.0	4.22652	up	--	--	IAA-Leu	2.74554	up	N-(3-Indolylacetyl)-L-leucine	--	--	0.833212	1.75899e-05	3
Cluster-130459.15	4.22766	up	--	--	IAA-Leu	2.74554	up	N-(3-Indolylacetyl)-L-leucine	--	--	0.938543	8.42991e-09	3
Cluster-130459.8	4.4974	up	--	--	IAA-Leu	2.74554	up	N-(3-Indolylacetyl)-L-leucine	--	--	0.802971	6.02646e-05	3
Cluster-130484.0	4.15102	up	K08913	ko00196,ko01100	IAA-Leu	2.74554	up	N-(3-Indolylacetyl)-L-leucine	--	--	0.845574	9.89846e-06	3
Cluster-130484.3	2.86479	up	K08913	ko00196,ko01100	IAA-Leu	2.74554	up	N-(3-Indolylacetyl)-L-leucine	--	--	0.829258	2.0938e-05	3
Cluster-130484.4	2.0897	up	K08913	ko00196,ko01100	IAA-Leu	2.74554	up	N-(3-Indolylacetyl)-L-leucine	--	--	0.845418	9.97393e-06	3
Cluster-130707.11	5.4386	up	--	--	IAA-Leu	2.74554	up	N-(3-Indolylacetyl)-L-leucine	--	--	0.806591	5.25945e-05	3
Cluster-130707.3	2.80665	up	--	--	IAA-Leu	2.74554	up	N-(3-Indolylacetyl)-L-leucine	--	--	0.816205	3.61306e-05	3
Cluster-130743.0	1.73312	up	--	--	IAA-Leu	2.74554	up	N-(3-Indolylacetyl)-L-leucine	--	--	0.925537	3.75578e-08	3
Cluster-130743.16	8.13641	up	--	--	IAA-Leu	2.74554	up	N-(3-Indolylacetyl)-L-leucine	--	--	0.839042	1.34924e-05	3
Cluster-130863.0	7.19104	up	K12486	ko04144	IAA-Leu	2.74554	up	N-(3-Indolylacetyl)-L-leucine	--	--	0.82882	2.13395e-05	3
Cluster-131109.6	9.11836	up	--	--	IAA-Leu	2.74554	up	N-(3-Indolylacetyl)-L-leucine	--	--	0.83101	1.93928e-05	3
Cluster-131180.4	7.73965	up	--	--	IAA-Leu	2.74554	up	N-(3-Indolylacetyl)-L-leucine	--	--	0.813861	3.9671e-05	3
Cluster-131198.2	1.0569	up	--	--	IAA-Leu	2.74554	up	N-(3-Indolylacetyl)-L-leucine	--	--	0.845162	1.0098e-05	3
Cluster-131218.0	7.62175	up	--	--	IAA-Leu	2.74554	up	N-(3-Indolylacetyl)-L-leucine	--	--	0.854031	6.48737e-06	3
Cluster-131218.2	4.49903	up	--	--	IAA-Leu	2.74554	up	N-(3-Indolylacetyl)-L-leucine	--	--	0.862374	4.1643e-06	3
Cluster-131218.6	1.53526	up	--	--	IAA-Leu	2.74554	up	N-(3-Indolylacetyl)-L-leucine	--	--	0.80456	5.67885e-05	3
Cluster-131218.9	8.86437	up	--	--	IAA-Leu	2.74554	up	N-(3-Indolylacetyl)-L-leucine	--	--	0.845168	1.0095e-05	3
Cluster-131630.8	6.72608	up	--	--	IAA-Leu	2.74554	up	N-(3-Indolylacetyl)-L-leucine	--	--	0.832808	1.79097e-05	3
Cluster-131656.5	3.15448	up	--	--	IAA-Leu	2.74554	up	N-(3-Indolylacetyl)-L-leucine	--	--	0.841835	1.18385e-05	3
Cluster-131676.7	9.46415	up	K01179	ko00500,ko01100	IAA-Leu	2.74554	up	N-(3-Indolylacetyl)-L-leucine	--	--	0.849478	8.17029e-06	3
Cluster-131686.2	6.93214	up	K03943	ko00190,ko01100	IAA-Leu	2.74554	up	N-(3-Indolylacetyl)-L-leucine	--	--	0.800533	6.59486e-05	3
Cluster-131757.0	2.17519	up	K05275	ko00750,ko01100	IAA-Leu	2.74554	up	N-(3-Indolylacetyl)-L-leucine	--	--	0.862807	4.0666e-06	3
Cluster-131801.4	6.89001	up	K04035	ko00860,ko01100,ko01110	IAA-Leu	2.74554	up	N-(3-Indolylacetyl)-L-leucine	--	--	0.827595	2.25006e-05	3
Cluster-131841.6	1.11211	up	--	--	IAA-Leu	2.74554	up	N-(3-Indolylacetyl)-L-leucine	--	--	0.943098	4.61891e-09	3
Cluster-131900.6	7.64182	up	--	--	IAA-Leu	2.74554	up	N-(3-Indolylacetyl)-L-leucine	--	--	0.805073	5.57035e-05	3
Cluster-131938.0	1.00106	up	K05359	ko00400,ko01100,ko01110,ko01230	IAA-Leu	2.74554	up	N-(3-Indolylacetyl)-L-leucine	--	--	0.844246	1.05538e-05	3
Cluster-131944.3	7.79452	up	--	--	IAA-Leu	2.74554	up	N-(3-Indolylacetyl)-L-leucine	--	--	0.815994	3.64368e-05	3
Cluster-132082.3	1.08051	up	K02996	ko03010	IAA-Leu	2.74554	up	N-(3-Indolylacetyl)-L-leucine	--	--	0.819717	3.13299e-05	3
Cluster-132277.3	2.96387	up	--	--	IAA-Leu	2.74554	up	N-(3-Indolylacetyl)-L-leucine	--	--	0.810561	4.51546e-05	3
Cluster-132301.0	1.78627	up	--	--	IAA-Leu	2.74554	up	N-(3-Indolylacetyl)-L-leucine	--	--	0.856012	5.85373e-06	3
Cluster-132371.1	9.13155	up	--	--	IAA-Leu	2.74554	up	N-(3-Indolylacetyl)-L-leucine	--	--	0.807197	5.13955e-05	3
Cluster-132428.1	11.7535	up	K04077	ko03018	IAA-Leu	2.74554	up	N-(3-Indolylacetyl)-L-leucine	--	--	0.836982	1.48347e-05	3
Cluster-132428.2	8.78471	up	K04077	ko03018	IAA-Leu	2.74554	up	N-(3-Indolylacetyl)-L-leucine	--	--	0.811672	4.32402e-05	3
Cluster-132428.5	13.8503	up	K04077	ko03018	IAA-Leu	2.74554	up	N-(3-Indolylacetyl)-L-leucine	--	--	0.830452	1.98735e-05	3
Cluster-132490.3	2.20464	up	K00966	ko00051,ko00520,ko01100,ko01110,ko01240,ko01250	IAA-Leu	2.74554	up	N-(3-Indolylacetyl)-L-leucine	--	--	0.808969	4.80228e-05	3
Cluster-132520.14	1.13393	up	K14400	ko03015	IAA-Leu	2.74554	up	N-(3-Indolylacetyl)-L-leucine	--	--	0.825608	2.44975e-05	3
Cluster-132658.0	7.24006	up	K15404	ko00073,ko01110	IAA-Leu	2.74554	up	N-(3-Indolylacetyl)-L-leucine	--	--	0.813912	3.95906e-05	3
Cluster-132658.3	5.36979	up	K15404	ko00073,ko01110	IAA-Leu	2.74554	up	N-(3-Indolylacetyl)-L-leucine	--	--	0.819277	3.18995e-05	3
Cluster-132733.0	2.53484	up	--	--	IAA-Leu	2.74554	up	N-(3-Indolylacetyl)-L-leucine	--	--	0.826249	2.38368e-05	3
Cluster-132786.3	11.6797	up	K00679	ko00561,ko01100	IAA-Leu	2.74554	up	N-(3-Indolylacetyl)-L-leucine	--	--	0.829267	2.09293e-05	3
Cluster-132786.4	5.37641	up	--	--	IAA-Leu	2.74554	up	N-(3-Indolylacetyl)-L-leucine	--	--	0.81325	4.06406e-05	3
Cluster-132819.15	10.8544	up	--	--	IAA-Leu	2.74554	up	N-(3-Indolylacetyl)-L-leucine	--	--	0.803184	5.97881e-05	3
Cluster-132964.4	8.31826	up	K13065	ko00940,ko00941,ko00945,ko01100,ko01110	IAA-Leu	2.74554	up	N-(3-Indolylacetyl)-L-leucine	--	--	0.882197	1.2807e-06	3
Cluster-133404.3	1.67132	up	K03553	ko03440	IAA-Leu	2.74554	up	N-(3-Indolylacetyl)-L-leucine	--	--	0.828747	2.14076e-05	3
Cluster-133404.7	3.58214	up	K03553	ko03440	IAA-Leu	2.74554	up	N-(3-Indolylacetyl)-L-leucine	--	--	0.857039	5.54672e-06	3
Cluster-133552.0	9.68712	up	--	--	IAA-Leu	2.74554	up	N-(3-Indolylacetyl)-L-leucine	--	--	0.806651	5.24754e-05	3
Cluster-133667.0	3.67491	up	--	--	IAA-Leu	2.74554	up	N-(3-Indolylacetyl)-L-leucine	--	--	0.83182	1.87118e-05	3
Cluster-133970.10	2.23309	up	--	--	IAA-Leu	2.74554	up	N-(3-Indolylacetyl)-L-leucine	--	--	0.836057	1.54738e-05	3
Cluster-133970.5	6.89357	up	--	--	IAA-Leu	2.74554	up	N-(3-Indolylacetyl)-L-leucine	--	--	0.821285	2.93698e-05	3
Cluster-134213.4	1.52461	up	--	--	IAA-Leu	2.74554	up	N-(3-Indolylacetyl)-L-leucine	--	--	0.90546	2.37672e-07	3
Cluster-134356.10	11.5297	up	K01674	ko00910,ko01100	IAA-Leu	2.74554	up	N-(3-Indolylacetyl)-L-leucine	--	--	0.809125	4.77353e-05	3
Cluster-134470.0	8.76972	up	--	--	IAA-Leu	2.74554	up	N-(3-Indolylacetyl)-L-leucine	--	--	0.818394	3.30694e-05	3
Cluster-134793.239	6.98144	up	--	--	IAA-Leu	2.74554	up	N-(3-Indolylacetyl)-L-leucine	--	--	0.801601	6.34038e-05	3
Cluster-134836.0	1.04688	up	--	--	IAA-Leu	2.74554	up	N-(3-Indolylacetyl)-L-leucine	--	--	0.892292	6.4636e-07	3
Cluster-134883.0	1.86324	up	--	--	IAA-Leu	2.74554	up	N-(3-Indolylacetyl)-L-leucine	--	--	0.813027	4.10002e-05	3
Cluster-134883.5	3.12196	up	--	--	IAA-Leu	2.74554	up	N-(3-Indolylacetyl)-L-leucine	--	--	0.838974	1.35349e-05	3
Cluster-134897.0	1.04027	insig	--	--	IAA-Leu	2.74554	up	N-(3-Indolylacetyl)-L-leucine	--	--	0.805882	5.40282e-05	3
Cluster-134905.4	1.77953	up	--	--	IAA-Leu	2.74554	up	N-(3-Indolylacetyl)-L-leucine	--	--	0.820195	3.0721e-05	3
Cluster-135168.2	1.28859	up	--	--	IAA-Leu	2.74554	up	N-(3-Indolylacetyl)-L-leucine	--	--	0.821898	2.86315e-05	3
Cluster-135185.8	1.20199	insig	--	--	IAA-Leu	2.74554	up	N-(3-Indolylacetyl)-L-leucine	--	--	0.835589	1.58066e-05	3
Cluster-135258.4	7.22659	up	--	--	IAA-Leu	2.74554	up	N-(3-Indolylacetyl)-L-leucine	--	--	0.801303	6.41053e-05	3
Cluster-135343.6	8.0703	up	--	--	IAA-Leu	2.74554	up	N-(3-Indolylacetyl)-L-leucine	--	--	0.819643	3.14257e-05	3
Cluster-135432.11	8.20265	up	K13459	ko04626	IAA-Leu	2.74554	up	N-(3-Indolylacetyl)-L-leucine	--	--	0.855494	6.01421e-06	3
Cluster-13944.2	1.12747	insig	K20718	ko04016	IAA-Leu	2.74554	up	N-(3-Indolylacetyl)-L-leucine	--	--	0.844119	1.06186e-05	3
Cluster-13960.13	3.68248	up	--	--	IAA-Leu	2.74554	up	N-(3-Indolylacetyl)-L-leucine	--	--	0.867728	3.08561e-06	3
Cluster-13960.18	4.38702	up	--	--	IAA-Leu	2.74554	up	N-(3-Indolylacetyl)-L-leucine	--	--	0.861973	4.25678e-06	3
Cluster-14146.32	1.91945	up	--	--	IAA-Leu	2.74554	up	N-(3-Indolylacetyl)-L-leucine	--	--	0.845986	9.70241e-06	3
Cluster-14390.25	7.14327	up	--	--	IAA-Leu	2.74554	up	N-(3-Indolylacetyl)-L-leucine	--	--	0.818427	3.30251e-05	3
Cluster-14390.28	9.20946	up	K15892	ko00900,ko01110	IAA-Leu	2.74554	up	N-(3-Indolylacetyl)-L-leucine	--	--	0.802626	6.10415e-05	3
Cluster-14390.42	8.22556	up	K15892	ko00900,ko01110	IAA-Leu	2.74554	up	N-(3-Indolylacetyl)-L-leucine	--	--	0.802403	6.15507e-05	3
Cluster-14813.30	1.16873	up	--	--	IAA-Leu	2.74554	up	N-(3-Indolylacetyl)-L-leucine	--	--	0.822858	2.75086e-05	3
Cluster-16202.4	3.93039	up	--	--	IAA-Leu	2.74554	up	N-(3-Indolylacetyl)-L-leucine	--	--	0.871716	2.44719e-06	3
Cluster-17062.0	1.35872	up	--	--	IAA-Leu	2.74554	up	N-(3-Indolylacetyl)-L-leucine	--	--	0.82308	2.72542e-05	3
Cluster-17146.26	6.82057	up	K20782	ko00514	IAA-Leu	2.74554	up	N-(3-Indolylacetyl)-L-leucine	--	--	0.809127	4.77313e-05	3
Cluster-17353.8	8.76875	up	K12831	ko03040	IAA-Leu	2.74554	up	N-(3-Indolylacetyl)-L-leucine	--	--	0.814447	3.87596e-05	3
Cluster-17988.10	9.11195	up	--	--	IAA-Leu	2.74554	up	N-(3-Indolylacetyl)-L-leucine	--	--	0.843076	1.11618e-05	3
Cluster-17988.7	10.2136	up	--	--	IAA-Leu	2.74554	up	N-(3-Indolylacetyl)-L-leucine	--	--	0.815076	3.78001e-05	3
Cluster-18376.5	9.90447	up	--	--	IAA-Leu	2.74554	up	N-(3-Indolylacetyl)-L-leucine	--	--	0.842825	1.12955e-05	3
Cluster-18399.25	11.4561	up	--	--	IAA-Leu	2.74554	up	N-(3-Indolylacetyl)-L-leucine	--	--	0.802454	6.1433e-05	3
Cluster-18698.16	9.54856	up	--	--	IAA-Leu	2.74554	up	N-(3-Indolylacetyl)-L-leucine	--	--	0.816504	3.56976e-05	3
Cluster-18698.17	1.18774	up	--	--	IAA-Leu	2.74554	up	N-(3-Indolylacetyl)-L-leucine	--	--	0.907937	1.93734e-07	3
Cluster-18799.7	8.83362	up	K03097	ko03008,ko04712	IAA-Leu	2.74554	up	N-(3-Indolylacetyl)-L-leucine	--	--	0.809942	4.62522e-05	3
Cluster-18838.10	7.40936	up	--	--	IAA-Leu	2.74554	up	N-(3-Indolylacetyl)-L-leucine	--	--	0.812312	4.21704e-05	3
Cluster-18976.20	6.20043	up	--	--	IAA-Leu	2.74554	up	N-(3-Indolylacetyl)-L-leucine	--	--	0.813965	3.95085e-05	3
Cluster-19013.0	7.15342	up	--	--	IAA-Leu	2.74554	up	N-(3-Indolylacetyl)-L-leucine	--	--	0.833814	1.71223e-05	3
Cluster-19056.0	8.41427	up	--	--	IAA-Leu	2.74554	up	N-(3-Indolylacetyl)-L-leucine	--	--	0.849981	7.96776e-06	3
Cluster-19427.9	1.66797	up	--	--	IAA-Leu	2.74554	up	N-(3-Indolylacetyl)-L-leucine	--	--	0.849134	8.31144e-06	3
Cluster-19518.1	8.27537	up	--	--	IAA-Leu	2.74554	up	N-(3-Indolylacetyl)-L-leucine	--	--	0.803723	5.85979e-05	3
Cluster-19622.0	7.86565	up	--	--	IAA-Leu	2.74554	up	N-(3-Indolylacetyl)-L-leucine	--	--	0.856224	5.7893e-06	3
Cluster-19726.14	1.51474	up	K14682	ko00220,ko01100,ko01110,ko01210,ko01230	IAA-Leu	2.74554	up	N-(3-Indolylacetyl)-L-leucine	--	--	0.852766	6.92183e-06	3
Cluster-19726.16	7.36754	up	K00128	ko00010,ko00053,ko00071,ko00280,ko00310,ko00330,ko00340,ko00380,ko00410,ko00561,ko00620,ko00770,ko00903,ko01100,ko01110,ko01240	IAA-Leu	2.74554	up	N-(3-Indolylacetyl)-L-leucine	--	--	0.84447	1.04408e-05	3
Cluster-19843.14	3.84469	up	--	--	IAA-Leu	2.74554	up	N-(3-Indolylacetyl)-L-leucine	--	--	0.806226	5.33285e-05	3
Cluster-20076.6	1.87235	up	--	--	IAA-Leu	2.74554	up	N-(3-Indolylacetyl)-L-leucine	--	--	0.816121	3.62519e-05	3
Cluster-20231.10	7.73724	up	--	--	IAA-Leu	2.74554	up	N-(3-Indolylacetyl)-L-leucine	--	--	0.837167	1.471e-05	3
Cluster-20659.8	4.11335	up	K04077	ko03018	IAA-Leu	2.74554	up	N-(3-Indolylacetyl)-L-leucine	--	--	0.802614	6.10698e-05	3
Cluster-21011.3	6.92776	up	--	--	IAA-Leu	2.74554	up	N-(3-Indolylacetyl)-L-leucine	--	--	0.800548	6.59124e-05	3
Cluster-21295.40	1.6941	insig	--	--	IAA-Leu	2.74554	up	N-(3-Indolylacetyl)-L-leucine	--	--	0.876089	1.88104e-06	3
Cluster-21351.0	7.03747	up	--	--	IAA-Leu	2.74554	up	N-(3-Indolylacetyl)-L-leucine	--	--	0.836183	1.53856e-05	3
Cluster-21627.0	8.03782	up	--	--	IAA-Leu	2.74554	up	N-(3-Indolylacetyl)-L-leucine	--	--	0.818788	3.25436e-05	3
Cluster-21640.4	3.84756	up	--	--	IAA-Leu	2.74554	up	N-(3-Indolylacetyl)-L-leucine	--	--	0.835943	1.55545e-05	3
Cluster-21657.70	3.66371	up	--	--	IAA-Leu	2.74554	up	N-(3-Indolylacetyl)-L-leucine	--	--	0.818	3.36036e-05	3
Cluster-21763.7	6.8065	up	--	--	IAA-Leu	2.74554	up	N-(3-Indolylacetyl)-L-leucine	--	--	0.834164	1.68556e-05	3
Cluster-21763.8	2.24471	up	K01937	ko00240,ko01100,ko01232,ko01240	IAA-Leu	2.74554	up	N-(3-Indolylacetyl)-L-leucine	--	--	0.811167	4.41021e-05	3
Cluster-21832.6	7.32007	up	--	--	IAA-Leu	2.74554	up	N-(3-Indolylacetyl)-L-leucine	--	--	0.806917	5.19475e-05	3
Cluster-21987.0	7.04711	up	--	--	IAA-Leu	2.74554	up	N-(3-Indolylacetyl)-L-leucine	--	--	0.80969	4.67045e-05	3
Cluster-22279.0	7.10707	up	--	--	IAA-Leu	2.74554	up	N-(3-Indolylacetyl)-L-leucine	--	--	0.800499	6.60297e-05	3
Cluster-22501.0	7.15578	up	--	--	IAA-Leu	2.74554	up	N-(3-Indolylacetyl)-L-leucine	--	--	0.816106	3.62737e-05	3
Cluster-22516.0	7.28966	up	--	--	IAA-Leu	2.74554	up	N-(3-Indolylacetyl)-L-leucine	--	--	0.802183	6.20529e-05	3
Cluster-22722.0	9.04677	up	--	--	IAA-Leu	2.74554	up	N-(3-Indolylacetyl)-L-leucine	--	--	0.814416	3.88066e-05	3
Cluster-22978.8	10.7857	up	--	--	IAA-Leu	2.74554	up	N-(3-Indolylacetyl)-L-leucine	--	--	0.80813	4.95948e-05	3
Cluster-23282.0	7.01476	up	--	--	IAA-Leu	2.74554	up	N-(3-Indolylacetyl)-L-leucine	--	--	0.835975	1.55322e-05	3
Cluster-23305.0	6.97476	up	--	--	IAA-Leu	2.74554	up	N-(3-Indolylacetyl)-L-leucine	--	--	0.830915	1.94737e-05	3
Cluster-23405.0	8.75992	up	--	--	IAA-Leu	2.74554	up	N-(3-Indolylacetyl)-L-leucine	--	--	0.805544	5.47231e-05	3
Cluster-23881.0	8.21021	up	--	--	IAA-Leu	2.74554	up	N-(3-Indolylacetyl)-L-leucine	--	--	0.830419	1.99023e-05	3
Cluster-23935.0	7.358	up	--	--	IAA-Leu	2.74554	up	N-(3-Indolylacetyl)-L-leucine	--	--	0.805245	5.53422e-05	3
Cluster-24196.0	8.62542	up	--	--	IAA-Leu	2.74554	up	N-(3-Indolylacetyl)-L-leucine	--	--	0.815072	3.78057e-05	3
Cluster-24338.4	10.9495	up	--	--	IAA-Leu	2.74554	up	N-(3-Indolylacetyl)-L-leucine	--	--	0.81667	3.54602e-05	3
Cluster-24355.0	7.66289	up	--	--	IAA-Leu	2.74554	up	N-(3-Indolylacetyl)-L-leucine	--	--	0.832321	1.83014e-05	3
Cluster-24820.0	7.51217	up	--	--	IAA-Leu	2.74554	up	N-(3-Indolylacetyl)-L-leucine	--	--	0.810944	4.44868e-05	3
Cluster-25059.101	9.74069	up	--	--	IAA-Leu	2.74554	up	N-(3-Indolylacetyl)-L-leucine	--	--	0.803494	5.91012e-05	3
Cluster-25106.1	8.80757	up	--	--	IAA-Leu	2.74554	up	N-(3-Indolylacetyl)-L-leucine	--	--	0.803161	5.98397e-05	3
Cluster-25262.0	7.34579	up	--	--	IAA-Leu	2.74554	up	N-(3-Indolylacetyl)-L-leucine	--	--	0.835799	1.56563e-05	3
Cluster-25378.1	7.71778	up	--	--	IAA-Leu	2.74554	up	N-(3-Indolylacetyl)-L-leucine	--	--	0.840497	1.26075e-05	3
Cluster-25378.4	7.99221	up	--	--	IAA-Leu	2.74554	up	N-(3-Indolylacetyl)-L-leucine	--	--	0.825369	2.47476e-05	3
Cluster-25438.0	7.92303	up	K01784	ko00052,ko00520,ko01100,ko01250	IAA-Leu	2.74554	up	N-(3-Indolylacetyl)-L-leucine	--	--	0.804358	5.72208e-05	3
Cluster-25483.15	8.55409	up	--	--	IAA-Leu	2.74554	up	N-(3-Indolylacetyl)-L-leucine	--	--	0.805673	5.44573e-05	3
Cluster-25616.0	8.91257	up	--	--	IAA-Leu	2.74554	up	N-(3-Indolylacetyl)-L-leucine	--	--	0.855197	6.10762e-06	3
Cluster-25688.0	7.83496	up	--	--	IAA-Leu	2.74554	up	N-(3-Indolylacetyl)-L-leucine	--	--	0.812394	4.20338e-05	3
Cluster-25720.8	1.82845	up	--	--	IAA-Leu	2.74554	up	N-(3-Indolylacetyl)-L-leucine	--	--	0.815899	3.65757e-05	3
Cluster-26362.0	7.65306	up	--	--	IAA-Leu	2.74554	up	N-(3-Indolylacetyl)-L-leucine	--	--	0.823698	2.65575e-05	3
Cluster-26472.0	7.41025	up	--	--	IAA-Leu	2.74554	up	N-(3-Indolylacetyl)-L-leucine	--	--	0.826403	2.36809e-05	3
Cluster-26482.0	7.58015	up	K01968	ko00280,ko01100	IAA-Leu	2.74554	up	N-(3-Indolylacetyl)-L-leucine	--	--	0.837342	1.45921e-05	3
Cluster-26638.0	10.5777	up	--	--	IAA-Leu	2.74554	up	N-(3-Indolylacetyl)-L-leucine	--	--	0.800378	6.63252e-05	3
Cluster-27095.0	6.96464	up	--	--	IAA-Leu	2.74554	up	N-(3-Indolylacetyl)-L-leucine	--	--	0.811776	4.30646e-05	3
Cluster-27484.0	8.42301	up	--	--	IAA-Leu	2.74554	up	N-(3-Indolylacetyl)-L-leucine	--	--	0.806905	5.1971e-05	3
Cluster-27548.0	7.66534	up	--	--	IAA-Leu	2.74554	up	N-(3-Indolylacetyl)-L-leucine	--	--	0.800398	6.62759e-05	3
Cluster-27613.0	7.95267	up	--	--	IAA-Leu	2.74554	up	N-(3-Indolylacetyl)-L-leucine	--	--	0.803442	5.92164e-05	3
Cluster-27801.0	7.7327	up	--	--	IAA-Leu	2.74554	up	N-(3-Indolylacetyl)-L-leucine	--	--	0.800061	6.71008e-05	3
Cluster-27827.1	5.56104	up	--	--	IAA-Leu	2.74554	up	N-(3-Indolylacetyl)-L-leucine	--	--	0.82771	2.23889e-05	3
Cluster-28010.46	1.37516	up	K02685	ko03030	IAA-Leu	2.74554	up	N-(3-Indolylacetyl)-L-leucine	--	--	0.861403	4.39122e-06	3
Cluster-28058.0	10.7479	up	--	--	IAA-Leu	2.74554	up	N-(3-Indolylacetyl)-L-leucine	--	--	0.821726	2.88376e-05	3
Cluster-28070.1	5.26956	up	--	--	IAA-Leu	2.74554	up	N-(3-Indolylacetyl)-L-leucine	--	--	0.809077	4.7823e-05	3
Cluster-28077.7	5.18391	up	--	--	IAA-Leu	2.74554	up	N-(3-Indolylacetyl)-L-leucine	--	--	0.804499	5.69194e-05	3
Cluster-28112.1	7.82113	up	--	--	IAA-Leu	2.74554	up	N-(3-Indolylacetyl)-L-leucine	--	--	0.849693	8.08323e-06	3
Cluster-28126.14	9.84027	up	--	--	IAA-Leu	2.74554	up	N-(3-Indolylacetyl)-L-leucine	--	--	0.807802	5.02227e-05	3
Cluster-28227.0	8.00067	up	--	--	IAA-Leu	2.74554	up	N-(3-Indolylacetyl)-L-leucine	--	--	0.829309	2.0891e-05	3
Cluster-28383.22	5.65327	up	--	--	IAA-Leu	2.74554	up	N-(3-Indolylacetyl)-L-leucine	--	--	0.847874	8.84623e-06	3
Cluster-28430.0	9.844	up	K13544	ko00860,ko01110	IAA-Leu	2.74554	up	N-(3-Indolylacetyl)-L-leucine	--	--	0.859744	4.80355e-06	3
Cluster-28437.0	7.2837	up	K03017	ko03020	IAA-Leu	2.74554	up	N-(3-Indolylacetyl)-L-leucine	--	--	0.813496	4.02474e-05	3
Cluster-28936.0	6.99693	up	--	--	IAA-Leu	2.74554	up	N-(3-Indolylacetyl)-L-leucine	--	--	0.809679	4.67244e-05	3
Cluster-28998.13	8.0401	up	--	--	IAA-Leu	2.74554	up	N-(3-Indolylacetyl)-L-leucine	--	--	0.816822	3.5244e-05	3
Cluster-29482.0	8.04522	up	--	--	IAA-Leu	2.74554	up	N-(3-Indolylacetyl)-L-leucine	--	--	0.834296	1.67561e-05	3
Cluster-29598.1	9.13987	up	K14298	ko03013	IAA-Leu	2.74554	up	N-(3-Indolylacetyl)-L-leucine	--	--	0.808131	4.95942e-05	3
Cluster-29636.11	1.84666	up	--	--	IAA-Leu	2.74554	up	N-(3-Indolylacetyl)-L-leucine	--	--	0.928417	2.76476e-08	3
Cluster-29636.16	2.4317	up	--	--	IAA-Leu	2.74554	up	N-(3-Indolylacetyl)-L-leucine	--	--	0.903038	2.88716e-07	3
Cluster-29636.27	5.80594	up	--	--	IAA-Leu	2.74554	up	N-(3-Indolylacetyl)-L-leucine	--	--	0.821417	2.92094e-05	3
Cluster-29636.4	1.10828	insig	--	--	IAA-Leu	2.74554	up	N-(3-Indolylacetyl)-L-leucine	--	--	0.813167	4.07741e-05	3
Cluster-29949.0	7.35168	up	--	--	IAA-Leu	2.74554	up	N-(3-Indolylacetyl)-L-leucine	--	--	0.831498	1.89797e-05	3
Cluster-30671.5	7.1511	up	--	--	IAA-Leu	2.74554	up	N-(3-Indolylacetyl)-L-leucine	--	--	0.859401	4.8927e-06	3
Cluster-30685.7	9.5639	up	--	--	IAA-Leu	2.74554	up	N-(3-Indolylacetyl)-L-leucine	--	--	0.822206	2.82673e-05	3
Cluster-30766.0	9.26762	up	K14492	ko04075	IAA-Leu	2.74554	up	N-(3-Indolylacetyl)-L-leucine	--	--	0.812676	4.1571e-05	3
Cluster-30959.0	8.08991	up	K11352	ko00190,ko01100	IAA-Leu	2.74554	up	N-(3-Indolylacetyl)-L-leucine	--	--	0.876876	1.79224e-06	3
Cluster-31895.0	9.00034	up	--	--	IAA-Leu	2.74554	up	N-(3-Indolylacetyl)-L-leucine	--	--	0.847798	8.87914e-06	3
Cluster-32354.1	9.26159	up	--	--	IAA-Leu	2.74554	up	N-(3-Indolylacetyl)-L-leucine	--	--	0.815172	3.76555e-05	3
Cluster-32619.0	8.46845	up	--	--	IAA-Leu	2.74554	up	N-(3-Indolylacetyl)-L-leucine	--	--	0.828842	2.13198e-05	3
Cluster-32761.19	2.51468	up	--	--	IAA-Leu	2.74554	up	N-(3-Indolylacetyl)-L-leucine	--	--	0.804292	5.73623e-05	3
Cluster-32898.1	10.7432	up	--	--	IAA-Leu	2.74554	up	N-(3-Indolylacetyl)-L-leucine	--	--	0.835833	1.56321e-05	3
Cluster-33009.4	8.50263	up	--	--	IAA-Leu	2.74554	up	N-(3-Indolylacetyl)-L-leucine	--	--	0.81561	3.70026e-05	3
Cluster-33051.43	3.35718	up	--	--	IAA-Leu	2.74554	up	N-(3-Indolylacetyl)-L-leucine	--	--	0.804046	5.78943e-05	3
Cluster-33051.48	8.04415	up	--	--	IAA-Leu	2.74554	up	N-(3-Indolylacetyl)-L-leucine	--	--	0.813999	3.94552e-05	3
Cluster-33230.0	7.07986	up	--	--	IAA-Leu	2.74554	up	N-(3-Indolylacetyl)-L-leucine	--	--	0.835246	1.60535e-05	3
Cluster-33234.13	2.53391	up	--	--	IAA-Leu	2.74554	up	N-(3-Indolylacetyl)-L-leucine	--	--	0.804102	5.77713e-05	3
Cluster-33323.216	7.36981	up	--	--	IAA-Leu	2.74554	up	N-(3-Indolylacetyl)-L-leucine	--	--	0.823775	2.64715e-05	3
Cluster-33443.10	1.71888	up	K12135	ko04712	IAA-Leu	2.74554	up	N-(3-Indolylacetyl)-L-leucine	--	--	0.839172	1.3411e-05	3
Cluster-33443.7	1.79293	up	K12135	ko04712	IAA-Leu	2.74554	up	N-(3-Indolylacetyl)-L-leucine	--	--	0.849616	8.11439e-06	3
Cluster-33483.1	6.89229	up	--	--	IAA-Leu	2.74554	up	N-(3-Indolylacetyl)-L-leucine	--	--	0.812373	4.20687e-05	3
Cluster-33510.2	9.3062	up	--	--	IAA-Leu	2.74554	up	N-(3-Indolylacetyl)-L-leucine	--	--	0.841771	1.18743e-05	3
Cluster-33590.10	2.9876	up	K25193	ko00564	IAA-Leu	2.74554	up	N-(3-Indolylacetyl)-L-leucine	--	--	0.815158	3.76771e-05	3
Cluster-33671.0	8.29843	up	--	--	IAA-Leu	2.74554	up	N-(3-Indolylacetyl)-L-leucine	--	--	0.813116	4.08571e-05	3
Cluster-33723.0	7.10266	up	--	--	IAA-Leu	2.74554	up	N-(3-Indolylacetyl)-L-leucine	--	--	0.823107	2.72237e-05	3
Cluster-33723.2	10.1604	up	--	--	IAA-Leu	2.74554	up	N-(3-Indolylacetyl)-L-leucine	--	--	0.834266	1.67789e-05	3
Cluster-33723.3	6.79772	up	--	--	IAA-Leu	2.74554	up	N-(3-Indolylacetyl)-L-leucine	--	--	0.81553	3.71209e-05	3
Cluster-33741.14	1.00112	insig	K02685	ko03030	IAA-Leu	2.74554	up	N-(3-Indolylacetyl)-L-leucine	--	--	0.891806	6.69015e-07	3
Cluster-33741.2	7.76041	up	K00679	ko00561,ko01100	IAA-Leu	2.74554	up	N-(3-Indolylacetyl)-L-leucine	--	--	0.828882	2.12826e-05	3
Cluster-33741.20	3.92593	up	K00679	ko00561,ko01100	IAA-Leu	2.74554	up	N-(3-Indolylacetyl)-L-leucine	--	--	0.872719	2.30591e-06	3
Cluster-33758.0	7.25072	up	--	--	IAA-Leu	2.74554	up	N-(3-Indolylacetyl)-L-leucine	--	--	0.816148	3.62134e-05	3
Cluster-34083.47	2.07476	up	K07374	ko04145	IAA-Leu	2.74554	up	N-(3-Indolylacetyl)-L-leucine	--	--	0.845842	9.77061e-06	3
Cluster-34083.61	1.24431	up	K07374	ko04145	IAA-Leu	2.74554	up	N-(3-Indolylacetyl)-L-leucine	--	--	0.887809	8.82741e-07	3
Cluster-34083.72	1.2109	up	K07374	ko04145	IAA-Leu	2.74554	up	N-(3-Indolylacetyl)-L-leucine	--	--	0.874983	2.01239e-06	3
Cluster-34104.8	6.82513	up	K08504	ko04130	IAA-Leu	2.74554	up	N-(3-Indolylacetyl)-L-leucine	--	--	0.831355	1.91004e-05	3
Cluster-34256.10	11.0731	up	K09828	ko00100,ko01100,ko01110	IAA-Leu	2.74554	up	N-(3-Indolylacetyl)-L-leucine	--	--	0.859301	4.91891e-06	3
Cluster-34377.0	7.2764	up	--	--	IAA-Leu	2.74554	up	N-(3-Indolylacetyl)-L-leucine	--	--	0.81501	3.79003e-05	3
Cluster-34559.1	6.8103	up	--	--	IAA-Leu	2.74554	up	N-(3-Indolylacetyl)-L-leucine	--	--	0.845528	9.92061e-06	3
Cluster-34849.36	7.10974	up	K05658	ko02010	IAA-Leu	2.74554	up	N-(3-Indolylacetyl)-L-leucine	--	--	0.82137	2.92658e-05	3
Cluster-34911.8	7.9636	up	K04564	ko04146	IAA-Leu	2.74554	up	N-(3-Indolylacetyl)-L-leucine	--	--	0.858919	5.02043e-06	3
Cluster-34914.1	7.95734	up	--	--	IAA-Leu	2.74554	up	N-(3-Indolylacetyl)-L-leucine	--	--	0.809081	4.78156e-05	3
Cluster-34936.3	7.24006	up	--	--	IAA-Leu	2.74554	up	N-(3-Indolylacetyl)-L-leucine	--	--	0.837237	1.46626e-05	3
Cluster-34936.5	1.78596	up	K08343	ko04136	IAA-Leu	2.74554	up	N-(3-Indolylacetyl)-L-leucine	--	--	0.877725	1.70041e-06	3
Cluster-34991.447	8.47568	up	--	--	IAA-Leu	2.74554	up	N-(3-Indolylacetyl)-L-leucine	--	--	0.807968	4.99048e-05	3
Cluster-35001.6	7.83481	up	--	--	IAA-Leu	2.74554	up	N-(3-Indolylacetyl)-L-leucine	--	--	0.830652	1.96999e-05	3
Cluster-35213.1	1.79227	up	K13436	ko04626	IAA-Leu	2.74554	up	N-(3-Indolylacetyl)-L-leucine	--	--	0.838562	1.37951e-05	3
Cluster-35388.2	7.81887	up	--	--	IAA-Leu	2.74554	up	N-(3-Indolylacetyl)-L-leucine	--	--	0.80761	5.05913e-05	3
Cluster-35458.1	5.75778	up	K15376	ko00790,ko01100,ko01240	IAA-Leu	2.74554	up	N-(3-Indolylacetyl)-L-leucine	--	--	0.800652	6.56601e-05	3
Cluster-35472.16	1.8562	up	--	--	IAA-Leu	2.74554	up	N-(3-Indolylacetyl)-L-leucine	--	--	0.842675	1.13768e-05	3
Cluster-35615.0	9.08794	up	--	--	IAA-Leu	2.74554	up	N-(3-Indolylacetyl)-L-leucine	--	--	0.806689	5.23992e-05	3
Cluster-35625.13	3.89622	up	--	--	IAA-Leu	2.74554	up	N-(3-Indolylacetyl)-L-leucine	--	--	0.807947	4.99451e-05	3
Cluster-35672.7	8.01191	up	--	--	IAA-Leu	2.74554	up	N-(3-Indolylacetyl)-L-leucine	--	--	0.823654	2.66065e-05	3
Cluster-35786.14	6.84605	up	K12126	ko04075,ko04712	IAA-Leu	2.74554	up	N-(3-Indolylacetyl)-L-leucine	--	--	0.803762	5.85118e-05	3
Cluster-35786.17	1.05501	up	K12126	ko04075,ko04712	IAA-Leu	2.74554	up	N-(3-Indolylacetyl)-L-leucine	--	--	0.81442	3.88005e-05	3
Cluster-35786.23	9.61485	up	K12126	ko04075,ko04712	IAA-Leu	2.74554	up	N-(3-Indolylacetyl)-L-leucine	--	--	0.867341	3.15454e-06	3
Cluster-35786.24	7.26023	up	K12126	ko04075,ko04712	IAA-Leu	2.74554	up	N-(3-Indolylacetyl)-L-leucine	--	--	0.848511	8.57207e-06	3
Cluster-35850.180	5.91872	up	--	--	IAA-Leu	2.74554	up	N-(3-Indolylacetyl)-L-leucine	--	--	0.825221	2.49027e-05	3
Cluster-35850.88	1.15775	up	K09458	ko00061,ko00780,ko01100,ko01212,ko01240	IAA-Leu	2.74554	up	N-(3-Indolylacetyl)-L-leucine	--	--	0.909462	1.70352e-07	3
Cluster-35928.0	7.13356	up	K06689	ko04120,ko04141	IAA-Leu	2.74554	up	N-(3-Indolylacetyl)-L-leucine	--	--	0.826131	2.39576e-05	3
Cluster-36313.3	3.11925	up	K13416	ko04016,ko04075,ko04626	IAA-Leu	2.74554	up	N-(3-Indolylacetyl)-L-leucine	--	--	0.833192	1.76052e-05	3
Cluster-36313.8	10.5557	up	--	--	IAA-Leu	2.74554	up	N-(3-Indolylacetyl)-L-leucine	--	--	0.800283	6.65567e-05	3
Cluster-36896.35	11.2922	up	--	--	IAA-Leu	2.74554	up	N-(3-Indolylacetyl)-L-leucine	--	--	0.828835	2.13258e-05	3
Cluster-37104.0	10.89	up	--	--	IAA-Leu	2.74554	up	N-(3-Indolylacetyl)-L-leucine	--	--	0.800838	6.52119e-05	3
Cluster-37194.5	8.0555	up	--	--	IAA-Leu	2.74554	up	N-(3-Indolylacetyl)-L-leucine	--	--	0.800888	6.5093e-05	3
Cluster-37259.3	9.21587	up	--	--	IAA-Leu	2.74554	up	N-(3-Indolylacetyl)-L-leucine	--	--	0.829726	2.05148e-05	3
Cluster-37533.2	7.42889	up	--	--	IAA-Leu	2.74554	up	N-(3-Indolylacetyl)-L-leucine	--	--	0.806678	5.24219e-05	3
Cluster-37883.28	8.28925	up	--	--	IAA-Leu	2.74554	up	N-(3-Indolylacetyl)-L-leucine	--	--	0.822824	2.75479e-05	3
Cluster-37883.8	1.03188	up	--	--	IAA-Leu	2.74554	up	N-(3-Indolylacetyl)-L-leucine	--	--	0.849562	8.1363e-06	3
Cluster-37993.0	7.76128	up	--	--	IAA-Leu	2.74554	up	N-(3-Indolylacetyl)-L-leucine	--	--	0.810431	4.53836e-05	3
Cluster-38138.652	7.57277	up	--	--	IAA-Leu	2.74554	up	N-(3-Indolylacetyl)-L-leucine	--	--	0.842072	1.17068e-05	3
Cluster-38264.4	1.9502	up	K00700	ko00500,ko01100,ko01110	IAA-Leu	2.74554	up	N-(3-Indolylacetyl)-L-leucine	--	--	0.810227	4.57443e-05	3
Cluster-38372.66	8.76527	up	--	--	IAA-Leu	2.74554	up	N-(3-Indolylacetyl)-L-leucine	--	--	0.801377	6.39318e-05	3
Cluster-38446.0	7.30854	up	--	--	IAA-Leu	2.74554	up	N-(3-Indolylacetyl)-L-leucine	--	--	0.817261	3.46255e-05	3
Cluster-38529.2	4.05753	up	--	--	IAA-Leu	2.74554	up	N-(3-Indolylacetyl)-L-leucine	--	--	0.848992	8.37002e-06	3
Cluster-38566.5	2.26622	up	K12191	ko04144	IAA-Leu	2.74554	up	N-(3-Indolylacetyl)-L-leucine	--	--	0.965298	9.48292e-11	3
Cluster-38566.6	4.62273	up	K12191	ko04144	IAA-Leu	2.74554	up	N-(3-Indolylacetyl)-L-leucine	--	--	0.843638	1.08663e-05	3
Cluster-39762.8	10.0705	up	--	--	IAA-Leu	2.74554	up	N-(3-Indolylacetyl)-L-leucine	--	--	0.808761	4.84084e-05	3
Cluster-39872.0	6.69539	up	--	--	IAA-Leu	2.74554	up	N-(3-Indolylacetyl)-L-leucine	--	--	0.818455	3.29883e-05	3
Cluster-40192.11	5.03131	up	--	--	IAA-Leu	2.74554	up	N-(3-Indolylacetyl)-L-leucine	--	--	0.817043	3.49311e-05	3
Cluster-40810.21	3.96479	up	--	--	IAA-Leu	2.74554	up	N-(3-Indolylacetyl)-L-leucine	--	--	0.841311	1.2135e-05	3
Cluster-41189.0	7.11293	up	--	--	IAA-Leu	2.74554	up	N-(3-Indolylacetyl)-L-leucine	--	--	0.805724	5.43514e-05	3
Cluster-42369.60	4.89828	up	K15893	ko00260,ko00630,ko01100,ko01110,ko01200	IAA-Leu	2.74554	up	N-(3-Indolylacetyl)-L-leucine	--	--	0.809105	4.77719e-05	3
Cluster-42369.82	1.74461	up	K07375	ko04145	IAA-Leu	2.74554	up	N-(3-Indolylacetyl)-L-leucine	--	--	0.806253	5.32736e-05	3
Cluster-42369.83	1.22907	up	K07375	ko04145	IAA-Leu	2.74554	up	N-(3-Indolylacetyl)-L-leucine	--	--	0.824409	2.57734e-05	3
Cluster-43129.0	10.1299	up	--	--	IAA-Leu	2.74554	up	N-(3-Indolylacetyl)-L-leucine	--	--	0.816403	3.58437e-05	3
Cluster-4349.5	1.47155	up	--	--	IAA-Leu	2.74554	up	N-(3-Indolylacetyl)-L-leucine	--	--	0.838195	1.40309e-05	3
Cluster-45255.28	5.52838	up	--	--	IAA-Leu	2.74554	up	N-(3-Indolylacetyl)-L-leucine	--	--	0.852461	7.03046e-06	3
Cluster-45255.32	8.62957	up	--	--	IAA-Leu	2.74554	up	N-(3-Indolylacetyl)-L-leucine	--	--	0.819167	3.20431e-05	3
Cluster-45666.2	9.77194	up	K13993	ko04141	IAA-Leu	2.74554	up	N-(3-Indolylacetyl)-L-leucine	--	--	0.819584	3.15009e-05	3
Cluster-46089.0	7.54237	up	--	--	IAA-Leu	2.74554	up	N-(3-Indolylacetyl)-L-leucine	--	--	0.826688	2.3394e-05	3
Cluster-46504.10	3.58781	up	--	--	IAA-Leu	2.74554	up	N-(3-Indolylacetyl)-L-leucine	--	--	0.800409	6.62491e-05	3
Cluster-46504.3	1.6718	up	--	--	IAA-Leu	2.74554	up	N-(3-Indolylacetyl)-L-leucine	--	--	0.839735	1.30644e-05	3
Cluster-46555.0	6.93193	up	K20223	ko03013	IAA-Leu	2.74554	up	N-(3-Indolylacetyl)-L-leucine	--	--	0.826874	2.32078e-05	3
Cluster-47016.0	6.11402	up	K01886	ko00970,ko01100	IAA-Leu	2.74554	up	N-(3-Indolylacetyl)-L-leucine	--	--	0.805199	5.54398e-05	3
Cluster-47323.0	5.88775	up	--	--	IAA-Leu	2.74554	up	N-(3-Indolylacetyl)-L-leucine	--	--	0.812073	4.25671e-05	3
Cluster-48454.9	1.37075	up	--	--	IAA-Leu	2.74554	up	N-(3-Indolylacetyl)-L-leucine	--	--	0.837901	1.42224e-05	3
Cluster-48623.0	9.12438	up	--	--	IAA-Leu	2.74554	up	N-(3-Indolylacetyl)-L-leucine	--	--	0.825444	2.46688e-05	3
Cluster-49427.0	4.32536	up	--	--	IAA-Leu	2.74554	up	N-(3-Indolylacetyl)-L-leucine	--	--	0.820601	3.02117e-05	3
Cluster-49889.5	5.38139	up	K06063	ko03040	IAA-Leu	2.74554	up	N-(3-Indolylacetyl)-L-leucine	--	--	0.806322	5.31352e-05	3
Cluster-49927.0	6.74871	up	--	--	IAA-Leu	2.74554	up	N-(3-Indolylacetyl)-L-leucine	--	--	0.826973	2.31094e-05	3
Cluster-50179.4	9.3199	up	--	--	IAA-Leu	2.74554	up	N-(3-Indolylacetyl)-L-leucine	--	--	0.843836	1.07637e-05	3
Cluster-50528.77	7.76083	up	--	--	IAA-Leu	2.74554	up	N-(3-Indolylacetyl)-L-leucine	--	--	0.805489	5.48353e-05	3
Cluster-50859.172	2.36196	up	K12309	ko00052,ko00511,ko00531,ko00600,ko00604,ko01100	IAA-Leu	2.74554	up	N-(3-Indolylacetyl)-L-leucine	--	--	0.842199	1.16365e-05	3
Cluster-51069.14	7.20628	up	--	--	IAA-Leu	2.74554	up	N-(3-Indolylacetyl)-L-leucine	--	--	0.807712	5.03945e-05	3
Cluster-51339.0	4.3137	up	--	--	IAA-Leu	2.74554	up	N-(3-Indolylacetyl)-L-leucine	--	--	0.802147	6.21377e-05	3
Cluster-52031.1	1.76542	up	--	--	IAA-Leu	2.74554	up	N-(3-Indolylacetyl)-L-leucine	--	--	0.813799	3.97678e-05	3
Cluster-53194.0	4.40558	up	--	--	IAA-Leu	2.74554	up	N-(3-Indolylacetyl)-L-leucine	--	--	0.808548	4.8806e-05	3
Cluster-53236.7	4.0923	up	--	--	IAA-Leu	2.74554	up	N-(3-Indolylacetyl)-L-leucine	--	--	0.809757	4.65837e-05	3
Cluster-53298.0	6.44269	up	--	--	IAA-Leu	2.74554	up	N-(3-Indolylacetyl)-L-leucine	--	--	0.816805	3.52687e-05	3
Cluster-53845.0	3.35425	up	--	--	IAA-Leu	2.74554	up	N-(3-Indolylacetyl)-L-leucine	--	--	0.811725	4.31506e-05	3
Cluster-5408.14	9.68156	up	K13448	ko04626	IAA-Leu	2.74554	up	N-(3-Indolylacetyl)-L-leucine	--	--	0.811678	4.32304e-05	3
Cluster-5408.21	9.2288	up	--	--	IAA-Leu	2.74554	up	N-(3-Indolylacetyl)-L-leucine	--	--	0.806015	5.37561e-05	3
Cluster-54243.278	7.17901	up	--	--	IAA-Leu	2.74554	up	N-(3-Indolylacetyl)-L-leucine	--	--	0.804448	5.7027e-05	3
Cluster-54803.0	4.09798	up	--	--	IAA-Leu	2.74554	up	N-(3-Indolylacetyl)-L-leucine	--	--	0.807476	5.08521e-05	3
Cluster-54974.23	7.80496	up	K10875	ko03440	IAA-Leu	2.74554	up	N-(3-Indolylacetyl)-L-leucine	--	--	0.824156	2.60497e-05	3
Cluster-56000.9	1.37623	up	--	--	IAA-Leu	2.74554	up	N-(3-Indolylacetyl)-L-leucine	--	--	0.800765	6.53892e-05	3
Cluster-56207.15	1.7116	up	K03860	ko00563,ko01100	IAA-Leu	2.74554	up	N-(3-Indolylacetyl)-L-leucine	--	--	0.920115	6.47641e-08	3
Cluster-56689.0	3.36749	up	--	--	IAA-Leu	2.74554	up	N-(3-Indolylacetyl)-L-leucine	--	--	0.825805	2.42927e-05	3
Cluster-57536.0	4.00013	up	--	--	IAA-Leu	2.74554	up	N-(3-Indolylacetyl)-L-leucine	--	--	0.865912	3.42083e-06	3
Cluster-57579.5	5.8669	up	K05928	ko00130,ko01100,ko01110,ko01240	IAA-Leu	2.74554	up	N-(3-Indolylacetyl)-L-leucine	--	--	0.815746	3.68018e-05	3
Cluster-57995.9	7.23793	up	--	--	IAA-Leu	2.74554	up	N-(3-Indolylacetyl)-L-leucine	--	--	0.801555	6.3513e-05	3
Cluster-58181.11	11.7743	up	--	--	IAA-Leu	2.74554	up	N-(3-Indolylacetyl)-L-leucine	--	--	0.822539	2.78777e-05	3
Cluster-58630.14	2.94979	up	--	--	IAA-Leu	2.74554	up	N-(3-Indolylacetyl)-L-leucine	--	--	0.857408	5.4399e-06	3
Cluster-5868.14	11.5946	up	K17108	ko00511,ko00600,ko01100	IAA-Leu	2.74554	up	N-(3-Indolylacetyl)-L-leucine	--	--	0.858345	5.17632e-06	3
Cluster-5868.15	11.5911	up	K17108	ko00511,ko00600,ko01100	IAA-Leu	2.74554	up	N-(3-Indolylacetyl)-L-leucine	--	--	0.815757	3.67844e-05	3
Cluster-59139.0	7.60681	up	--	--	IAA-Leu	2.74554	up	N-(3-Indolylacetyl)-L-leucine	--	--	0.813969	3.95018e-05	3
Cluster-59161.1	3.00636	up	K13420	ko04016,ko04626	IAA-Leu	2.74554	up	N-(3-Indolylacetyl)-L-leucine	--	--	0.812329	4.2142e-05	3
Cluster-59257.747	7.27549	up	--	--	IAA-Leu	2.74554	up	N-(3-Indolylacetyl)-L-leucine	--	--	0.839584	1.31569e-05	3
Cluster-59329.0	6.81167	up	--	--	IAA-Leu	2.74554	up	N-(3-Indolylacetyl)-L-leucine	--	--	0.8279	2.22061e-05	3
Cluster-59842.0	5.2892	up	--	--	IAA-Leu	2.74554	up	N-(3-Indolylacetyl)-L-leucine	--	--	0.821519	2.90866e-05	3
Cluster-60290.6	3.71982	up	--	--	IAA-Leu	2.74554	up	N-(3-Indolylacetyl)-L-leucine	--	--	0.804793	5.62933e-05	3
Cluster-60693.0	9.54458	up	--	--	IAA-Leu	2.74554	up	N-(3-Indolylacetyl)-L-leucine	--	--	0.818531	3.28859e-05	3
Cluster-61443.6	1.50408	up	--	--	IAA-Leu	2.74554	up	N-(3-Indolylacetyl)-L-leucine	--	--	0.805522	5.47673e-05	3
Cluster-61760.0	6.09656	up	--	--	IAA-Leu	2.74554	up	N-(3-Indolylacetyl)-L-leucine	--	--	0.804886	5.60961e-05	3
Cluster-62057.12	7.57829	up	--	--	IAA-Leu	2.74554	up	N-(3-Indolylacetyl)-L-leucine	--	--	0.807242	5.13076e-05	3
Cluster-62125.23	4.93756	up	--	--	IAA-Leu	2.74554	up	N-(3-Indolylacetyl)-L-leucine	--	--	0.825065	2.50679e-05	3
Cluster-62406.3	1.56985	up	K01893	ko00970	IAA-Leu	2.74554	up	N-(3-Indolylacetyl)-L-leucine	--	--	0.833748	1.71736e-05	3
Cluster-62438.0	4.49769	up	--	--	IAA-Leu	2.74554	up	N-(3-Indolylacetyl)-L-leucine	--	--	0.816099	3.62837e-05	3
Cluster-62748.0	5.80655	up	--	--	IAA-Leu	2.74554	up	N-(3-Indolylacetyl)-L-leucine	--	--	0.827426	2.26645e-05	3
Cluster-63412.6	1.93292	up	--	--	IAA-Leu	2.74554	up	N-(3-Indolylacetyl)-L-leucine	--	--	0.937909	9.13302e-09	3
Cluster-63866.1	10.2509	up	K07151	ko00510,ko00513,ko01100,ko04141	IAA-Leu	2.74554	up	N-(3-Indolylacetyl)-L-leucine	--	--	0.895822	5.00823e-07	3
Cluster-64008.15	1.89803	up	K20718	ko04016	IAA-Leu	2.74554	up	N-(3-Indolylacetyl)-L-leucine	--	--	0.888589	8.36924e-07	3
Cluster-64008.16	1.24528	insig	K20718	ko04016	IAA-Leu	2.74554	up	N-(3-Indolylacetyl)-L-leucine	--	--	0.887297	9.13922e-07	3
Cluster-64008.20	11.0467	up	K20718	ko04016	IAA-Leu	2.74554	up	N-(3-Indolylacetyl)-L-leucine	--	--	0.810791	4.47525e-05	3
Cluster-64870.0	4.63418	up	--	--	IAA-Leu	2.74554	up	N-(3-Indolylacetyl)-L-leucine	--	--	0.822969	2.73808e-05	3
Cluster-65123.4	4.55511	up	K00844	ko00010,ko00051,ko00052,ko00500,ko00520,ko00524,ko01100,ko01110,ko01200,ko01250	IAA-Leu	2.74554	up	N-(3-Indolylacetyl)-L-leucine	--	--	0.819125	3.2099e-05	3
Cluster-6536.24	5.73376	up	K03644	ko00785,ko01100,ko01240	IAA-Leu	2.74554	up	N-(3-Indolylacetyl)-L-leucine	--	--	0.812552	4.17739e-05	3
Cluster-6536.26	3.02474	up	K03644	ko00785,ko01100,ko01240	IAA-Leu	2.74554	up	N-(3-Indolylacetyl)-L-leucine	--	--	0.804635	5.66285e-05	3
Cluster-66038.27	7.44425	up	K02108	ko00190,ko00195,ko01100	IAA-Leu	2.74554	up	N-(3-Indolylacetyl)-L-leucine	--	--	0.835457	1.59014e-05	3
Cluster-66566.5	8.8608	up	--	--	IAA-Leu	2.74554	up	N-(3-Indolylacetyl)-L-leucine	--	--	0.810075	4.60138e-05	3
Cluster-66573.4	2.01277	up	--	--	IAA-Leu	2.74554	up	N-(3-Indolylacetyl)-L-leucine	--	--	0.849443	8.1845e-06	3
Cluster-66575.0	5.84058	up	--	--	IAA-Leu	2.74554	up	N-(3-Indolylacetyl)-L-leucine	--	--	0.822807	2.75675e-05	3
Cluster-66733.6	1.25527	up	K10144	ko04120	IAA-Leu	2.74554	up	N-(3-Indolylacetyl)-L-leucine	--	--	0.863138	3.99313e-06	3
Cluster-66818.12	13.4494	up	K05658	ko02010	IAA-Leu	2.74554	up	N-(3-Indolylacetyl)-L-leucine	--	--	0.81547	3.72095e-05	3
Cluster-67146.0	7.98996	up	--	--	IAA-Leu	2.74554	up	N-(3-Indolylacetyl)-L-leucine	--	--	0.81372	3.98927e-05	3
Cluster-68272.5	9.39813	up	K02899	ko03010	IAA-Leu	2.74554	up	N-(3-Indolylacetyl)-L-leucine	--	--	0.861393	4.39372e-06	3
Cluster-68317.5	7.37261	up	--	--	IAA-Leu	2.74554	up	N-(3-Indolylacetyl)-L-leucine	--	--	0.802616	6.10643e-05	3
Cluster-68333.0	7.36315	up	--	--	IAA-Leu	2.74554	up	N-(3-Indolylacetyl)-L-leucine	--	--	0.844136	1.06098e-05	3
Cluster-68538.2	2.59363	insig	--	--	IAA-Leu	2.74554	up	N-(3-Indolylacetyl)-L-leucine	--	--	0.861635	4.33601e-06	3
Cluster-68669.6	2.83903	up	K02140	ko00190,ko01100	IAA-Leu	2.74554	up	N-(3-Indolylacetyl)-L-leucine	--	--	0.833451	1.74032e-05	3
Cluster-69617.2	4.42981	up	--	--	IAA-Leu	2.74554	up	N-(3-Indolylacetyl)-L-leucine	--	--	0.830769	1.9599e-05	3
Cluster-69650.8	7.27437	up	K01179	ko00500,ko01100	IAA-Leu	2.74554	up	N-(3-Indolylacetyl)-L-leucine	--	--	0.873149	2.24738e-06	3
Cluster-69910.2	1.32786	up	--	--	IAA-Leu	2.74554	up	N-(3-Indolylacetyl)-L-leucine	--	--	0.832922	1.78185e-05	3
Cluster-70063.0	2.25972	up	--	--	IAA-Leu	2.74554	up	N-(3-Indolylacetyl)-L-leucine	--	--	0.858348	5.17576e-06	3
Cluster-70274.1	4.99035	up	--	--	IAA-Leu	2.74554	up	N-(3-Indolylacetyl)-L-leucine	--	--	0.891191	6.98637e-07	3
Cluster-70379.2	8.21708	up	--	--	IAA-Leu	2.74554	up	N-(3-Indolylacetyl)-L-leucine	--	--	0.814595	3.8532e-05	3
Cluster-70912.3	1.39323	up	K02433	ko00970,ko01100	IAA-Leu	2.74554	up	N-(3-Indolylacetyl)-L-leucine	--	--	0.87891	1.57907e-06	3
Cluster-7161.4	7.49734	up	--	--	IAA-Leu	2.74554	up	N-(3-Indolylacetyl)-L-leucine	--	--	0.848871	8.42046e-06	3
Cluster-71948.29	6.93663	up	K02704	ko00195,ko01100	IAA-Leu	2.74554	up	N-(3-Indolylacetyl)-L-leucine	--	--	0.816346	3.59261e-05	3
Cluster-72111.4	1.50499	up	--	--	IAA-Leu	2.74554	up	N-(3-Indolylacetyl)-L-leucine	--	--	0.809392	4.72462e-05	3
Cluster-72149.0	2.5712	up	K00889	ko00562,ko01100,ko04070,ko04144	IAA-Leu	2.74554	up	N-(3-Indolylacetyl)-L-leucine	--	--	0.863761	3.85787e-06	3
Cluster-72215.0	1.46903	up	K01051	ko00040,ko01100	IAA-Leu	2.74554	up	N-(3-Indolylacetyl)-L-leucine	--	--	0.868531	2.94678e-06	3
Cluster-72300.17	2.79656	up	K10615	ko04120	IAA-Leu	2.74554	up	N-(3-Indolylacetyl)-L-leucine	--	--	0.820778	2.99916e-05	3
Cluster-72302.13	5.55905	up	--	--	IAA-Leu	2.74554	up	N-(3-Indolylacetyl)-L-leucine	--	--	0.843669	1.08499e-05	3
Cluster-72302.15	7.78856	up	--	--	IAA-Leu	2.74554	up	N-(3-Indolylacetyl)-L-leucine	--	--	0.827422	2.26682e-05	3
Cluster-72302.7	3.29437	up	--	--	IAA-Leu	2.74554	up	N-(3-Indolylacetyl)-L-leucine	--	--	0.837568	1.44417e-05	3
Cluster-72425.5	6.22141	up	--	--	IAA-Leu	2.74554	up	N-(3-Indolylacetyl)-L-leucine	--	--	0.830351	1.99617e-05	3
Cluster-72455.0	3.72908	up	--	--	IAA-Leu	2.74554	up	N-(3-Indolylacetyl)-L-leucine	--	--	0.824469	2.57079e-05	3
Cluster-72550.18	1.97743	up	--	--	IAA-Leu	2.74554	up	N-(3-Indolylacetyl)-L-leucine	--	--	0.812063	4.25833e-05	3
Cluster-72550.36	4.78655	up	--	--	IAA-Leu	2.74554	up	N-(3-Indolylacetyl)-L-leucine	--	--	0.855508	6.00974e-06	3
Cluster-72550.37	2.44401	up	--	--	IAA-Leu	2.74554	up	N-(3-Indolylacetyl)-L-leucine	--	--	0.807157	5.14736e-05	3
Cluster-72550.4	3.08458	up	--	--	IAA-Leu	2.74554	up	N-(3-Indolylacetyl)-L-leucine	--	--	0.853803	6.56378e-06	3
Cluster-72550.40	5.56939	up	--	--	IAA-Leu	2.74554	up	N-(3-Indolylacetyl)-L-leucine	--	--	0.813476	4.02797e-05	3
Cluster-72550.6	3.24378	up	--	--	IAA-Leu	2.74554	up	N-(3-Indolylacetyl)-L-leucine	--	--	0.833018	1.77425e-05	3
Cluster-7269.16	7.81618	up	--	--	IAA-Leu	2.74554	up	N-(3-Indolylacetyl)-L-leucine	--	--	0.804809	5.62587e-05	3
Cluster-7280.14	1.79896	up	--	--	IAA-Leu	2.74554	up	N-(3-Indolylacetyl)-L-leucine	--	--	0.854215	6.42601e-06	3
Cluster-72901.0	2.17288	up	K12604	ko03018	IAA-Leu	2.74554	up	N-(3-Indolylacetyl)-L-leucine	--	--	0.900918	3.40913e-07	3
Cluster-72977.2	3.43326	up	--	--	IAA-Leu	2.74554	up	N-(3-Indolylacetyl)-L-leucine	--	--	0.890296	7.43799e-07	3
Cluster-73411.0	1.0725	up	--	--	IAA-Leu	2.74554	up	N-(3-Indolylacetyl)-L-leucine	--	--	0.887221	9.18651e-07	3
Cluster-73504.0	4.76709	up	--	--	IAA-Leu	2.74554	up	N-(3-Indolylacetyl)-L-leucine	--	--	0.8257	2.44011e-05	3
Cluster-74371.1	4.5818	up	--	--	IAA-Leu	2.74554	up	N-(3-Indolylacetyl)-L-leucine	--	--	0.821787	2.87638e-05	3
Cluster-74503.9	13.0918	up	--	--	IAA-Leu	2.74554	up	N-(3-Indolylacetyl)-L-leucine	--	--	0.800709	6.55224e-05	3
Cluster-75446.11	3.17237	up	K00765	ko00340,ko01100,ko01110,ko01230	IAA-Leu	2.74554	up	N-(3-Indolylacetyl)-L-leucine	--	--	0.802211	6.19888e-05	3
Cluster-75662.0	6.87461	up	--	--	IAA-Leu	2.74554	up	N-(3-Indolylacetyl)-L-leucine	--	--	0.823827	2.64136e-05	3
Cluster-7582.12	5.11498	up	--	--	IAA-Leu	2.74554	up	N-(3-Indolylacetyl)-L-leucine	--	--	0.818153	3.33955e-05	3
Cluster-76059.1	1.42014	up	--	--	IAA-Leu	2.74554	up	N-(3-Indolylacetyl)-L-leucine	--	--	0.854591	6.30269e-06	3
Cluster-76451.0	5.11711	up	--	--	IAA-Leu	2.74554	up	N-(3-Indolylacetyl)-L-leucine	--	--	0.831334	1.9118e-05	3
Cluster-76574.3	6.48657	up	--	--	IAA-Leu	2.74554	up	N-(3-Indolylacetyl)-L-leucine	--	--	0.828016	2.20957e-05	3
Cluster-76775.0	3.3558	up	--	--	IAA-Leu	2.74554	up	N-(3-Indolylacetyl)-L-leucine	--	--	0.809691	4.67029e-05	3
Cluster-76775.6	1.09405	up	--	--	IAA-Leu	2.74554	up	N-(3-Indolylacetyl)-L-leucine	--	--	0.813791	3.97817e-05	3
Cluster-76831.2	7.32053	up	--	--	IAA-Leu	2.74554	up	N-(3-Indolylacetyl)-L-leucine	--	--	0.811052	4.42996e-05	3
Cluster-77455.2	7.69776	up	--	--	IAA-Leu	2.74554	up	N-(3-Indolylacetyl)-L-leucine	--	--	0.832358	1.8271e-05	3
Cluster-77455.7	8.16015	up	--	--	IAA-Leu	2.74554	up	N-(3-Indolylacetyl)-L-leucine	--	--	0.808893	4.81641e-05	3
Cluster-77503.0	3.97703	up	--	--	IAA-Leu	2.74554	up	N-(3-Indolylacetyl)-L-leucine	--	--	0.841203	1.21965e-05	3
Cluster-77828.0	1.47521	up	--	--	IAA-Leu	2.74554	up	N-(3-Indolylacetyl)-L-leucine	--	--	0.841599	1.19712e-05	3
Cluster-78083.1	3.098	up	--	--	IAA-Leu	2.74554	up	N-(3-Indolylacetyl)-L-leucine	--	--	0.873687	2.17613e-06	3
Cluster-78537.13	1.06569	up	K14486	ko04075	IAA-Leu	2.74554	up	N-(3-Indolylacetyl)-L-leucine	--	--	0.857917	5.29543e-06	3
Cluster-78537.15	1.22478	up	K14486	ko04075	IAA-Leu	2.74554	up	N-(3-Indolylacetyl)-L-leucine	--	--	0.856052	5.84151e-06	3
Cluster-79629.0	11.8739	up	--	--	IAA-Leu	2.74554	up	N-(3-Indolylacetyl)-L-leucine	--	--	0.876744	1.80679e-06	3
Cluster-80227.4	1.56902	up	K11420	ko00310,ko01100	IAA-Leu	2.74554	up	N-(3-Indolylacetyl)-L-leucine	--	--	0.861522	4.36278e-06	3
Cluster-81068.0	1.3612	up	--	--	IAA-Leu	2.74554	up	N-(3-Indolylacetyl)-L-leucine	--	--	0.927846	2.94071e-08	3
Cluster-81083.5	4.33479	up	K05658	ko02010	IAA-Leu	2.74554	up	N-(3-Indolylacetyl)-L-leucine	--	--	0.840063	1.28663e-05	3
Cluster-81602.2	8.3716	up	--	--	IAA-Leu	2.74554	up	N-(3-Indolylacetyl)-L-leucine	--	--	0.809337	4.73471e-05	3
Cluster-81778.2	7.60949	up	K00679	ko00561,ko01100	IAA-Leu	2.74554	up	N-(3-Indolylacetyl)-L-leucine	--	--	0.88493	1.07097e-06	3
Cluster-82158.0	3.38342	up	K08913	ko00196,ko01100	IAA-Leu	2.74554	up	N-(3-Indolylacetyl)-L-leucine	--	--	0.840379	1.26775e-05	3
Cluster-82171.1	2.62734	up	--	--	IAA-Leu	2.74554	up	N-(3-Indolylacetyl)-L-leucine	--	--	0.810369	4.54933e-05	3
Cluster-82225.0	5.60516	up	--	--	IAA-Leu	2.74554	up	N-(3-Indolylacetyl)-L-leucine	--	--	0.884475	1.10369e-06	3
Cluster-82462.3	1.91176	up	K08711	ko02010	IAA-Leu	2.74554	up	N-(3-Indolylacetyl)-L-leucine	--	--	0.881094	1.37487e-06	3
Cluster-82725.2	1.23903	up	K12133	ko04712	IAA-Leu	2.74554	up	N-(3-Indolylacetyl)-L-leucine	--	--	0.884043	1.13551e-06	3
Cluster-82972.15	8.74474	up	--	--	IAA-Leu	2.74554	up	N-(3-Indolylacetyl)-L-leucine	--	--	0.810237	4.57267e-05	3
Cluster-82972.17	9.46946	up	--	--	IAA-Leu	2.74554	up	N-(3-Indolylacetyl)-L-leucine	--	--	0.835703	1.57251e-05	3
Cluster-83326.25	11.0005	up	--	--	IAA-Leu	2.74554	up	N-(3-Indolylacetyl)-L-leucine	--	--	0.862561	4.12192e-06	3
Cluster-83484.9	2.57516	up	--	--	IAA-Leu	2.74554	up	N-(3-Indolylacetyl)-L-leucine	--	--	0.80164	6.33131e-05	3
Cluster-83745.0	2.51101	up	--	--	IAA-Leu	2.74554	up	N-(3-Indolylacetyl)-L-leucine	--	--	0.864306	3.74286e-06	3
Cluster-84312.0	2.62706	up	K22097	ko00950,ko01100,ko01110	IAA-Leu	2.74554	up	N-(3-Indolylacetyl)-L-leucine	--	--	0.809602	4.68634e-05	3
Cluster-84952.0	10.0556	up	--	--	IAA-Leu	2.74554	up	N-(3-Indolylacetyl)-L-leucine	--	--	0.829912	2.03488e-05	3
Cluster-85209.2	3.73698	up	--	--	IAA-Leu	2.74554	up	N-(3-Indolylacetyl)-L-leucine	--	--	0.82838	2.17506e-05	3
Cluster-85218.0	2.94513	up	K02695	ko00195,ko01100	IAA-Leu	2.74554	up	N-(3-Indolylacetyl)-L-leucine	--	--	0.828676	2.14734e-05	3
Cluster-85546.2	12.0171	up	--	--	IAA-Leu	2.74554	up	N-(3-Indolylacetyl)-L-leucine	--	--	0.800376	6.63302e-05	3
Cluster-85774.1	11.9816	up	K12502	ko00130,ko01100,ko01110,ko01240	IAA-Leu	2.74554	up	N-(3-Indolylacetyl)-L-leucine	--	--	0.85518	6.113e-06	3
Cluster-85845.0	5.37836	up	--	--	IAA-Leu	2.74554	up	N-(3-Indolylacetyl)-L-leucine	--	--	0.801428	6.38104e-05	3
Cluster-85845.1	4.66055	up	--	--	IAA-Leu	2.74554	up	N-(3-Indolylacetyl)-L-leucine	--	--	0.873436	2.20912e-06	3
Cluster-85872.0	2.36122	up	--	--	IAA-Leu	2.74554	up	N-(3-Indolylacetyl)-L-leucine	--	--	0.869521	2.7828e-06	3
Cluster-85950.3	13.3895	up	--	--	IAA-Leu	2.74554	up	N-(3-Indolylacetyl)-L-leucine	--	--	0.81438	3.88626e-05	3
Cluster-86094.14	3.92593	up	K16040	ko00945,ko01110	IAA-Leu	2.74554	up	N-(3-Indolylacetyl)-L-leucine	--	--	0.830498	1.98341e-05	3
Cluster-86094.23	9.31353	up	K22588	ko00380,ko01100,ko01110	IAA-Leu	2.74554	up	N-(3-Indolylacetyl)-L-leucine	--	--	0.804778	5.63252e-05	3
Cluster-86652.0	1.06105	up	--	--	IAA-Leu	2.74554	up	N-(3-Indolylacetyl)-L-leucine	--	--	0.837867	1.42447e-05	3
Cluster-86880.14	1.18624	up	--	--	IAA-Leu	2.74554	up	N-(3-Indolylacetyl)-L-leucine	--	--	0.910157	1.60521e-07	3
Cluster-86880.6	9.04143	up	--	--	IAA-Leu	2.74554	up	N-(3-Indolylacetyl)-L-leucine	--	--	0.815111	3.77469e-05	3
Cluster-86927.2	4.90225	up	--	--	IAA-Leu	2.74554	up	N-(3-Indolylacetyl)-L-leucine	--	--	0.841973	1.17618e-05	3
Cluster-87170.2	11.855	up	K15803	ko00909	IAA-Leu	2.74554	up	N-(3-Indolylacetyl)-L-leucine	--	--	0.859477	4.87286e-06	3
Cluster-87170.6	10.7951	up	K15803	ko00909	IAA-Leu	2.74554	up	N-(3-Indolylacetyl)-L-leucine	--	--	0.860945	4.50195e-06	3
Cluster-87643.0	3.07196	up	--	--	IAA-Leu	2.74554	up	N-(3-Indolylacetyl)-L-leucine	--	--	0.906513	2.18047e-07	3
Cluster-87877.0	11.61	up	--	--	IAA-Leu	2.74554	up	N-(3-Indolylacetyl)-L-leucine	--	--	0.828385	2.17464e-05	3
Cluster-87950.4	11.0966	up	--	--	IAA-Leu	2.74554	up	N-(3-Indolylacetyl)-L-leucine	--	--	0.833313	1.75105e-05	3
Cluster-87950.6	9.1739	up	--	--	IAA-Leu	2.74554	up	N-(3-Indolylacetyl)-L-leucine	--	--	0.886178	9.85505e-07	3
Cluster-88030.10	7.15652	up	K03029	ko03050	IAA-Leu	2.74554	up	N-(3-Indolylacetyl)-L-leucine	--	--	0.83979	1.30309e-05	3
Cluster-88030.12	4.6003	up	K03029	ko03050	IAA-Leu	2.74554	up	N-(3-Indolylacetyl)-L-leucine	--	--	0.842424	1.15131e-05	3
Cluster-88835.7	5.34218	up	K14488	ko04075	IAA-Leu	2.74554	up	N-(3-Indolylacetyl)-L-leucine	--	--	0.94776	2.36597e-09	3
Cluster-89036.0	2.38911	up	--	--	IAA-Leu	2.74554	up	N-(3-Indolylacetyl)-L-leucine	--	--	0.844489	1.04314e-05	3
Cluster-89649.5	3.40861	up	K18878	ko04626	IAA-Leu	2.74554	up	N-(3-Indolylacetyl)-L-leucine	--	--	0.81327	4.06091e-05	3
Cluster-89757.0	3.16356	up	--	--	IAA-Leu	2.74554	up	N-(3-Indolylacetyl)-L-leucine	--	--	0.827265	2.2822e-05	3
Cluster-89761.1	7.4366	up	--	--	IAA-Leu	2.74554	up	N-(3-Indolylacetyl)-L-leucine	--	--	0.820239	3.06656e-05	3
Cluster-89964.2	1.7008	up	--	--	IAA-Leu	2.74554	up	N-(3-Indolylacetyl)-L-leucine	--	--	0.855581	5.98695e-06	3
Cluster-90076.11	7.07973	up	--	--	IAA-Leu	2.74554	up	N-(3-Indolylacetyl)-L-leucine	--	--	0.83953	1.31901e-05	3
Cluster-90326.9	6.79909	up	--	--	IAA-Leu	2.74554	up	N-(3-Indolylacetyl)-L-leucine	--	--	0.803338	5.94465e-05	3
Cluster-9057.143	5.6872	up	--	--	IAA-Leu	2.74554	up	N-(3-Indolylacetyl)-L-leucine	--	--	0.82225	2.82152e-05	3
Cluster-9057.170	5.85423	up	--	--	IAA-Leu	2.74554	up	N-(3-Indolylacetyl)-L-leucine	--	--	0.812478	4.18956e-05	3
Cluster-9057.173	7.54572	up	--	--	IAA-Leu	2.74554	up	N-(3-Indolylacetyl)-L-leucine	--	--	0.847502	9.00939e-06	3
Cluster-9057.229	7.11012	up	--	--	IAA-Leu	2.74554	up	N-(3-Indolylacetyl)-L-leucine	--	--	0.810511	4.52432e-05	3
Cluster-9057.233	7.17926	up	K05758	ko04144	IAA-Leu	2.74554	up	N-(3-Indolylacetyl)-L-leucine	--	--	0.801703	6.31653e-05	3
Cluster-9057.283	7.25793	up	--	--	IAA-Leu	2.74554	up	N-(3-Indolylacetyl)-L-leucine	--	--	0.805404	5.50121e-05	3
Cluster-90572.3	1.44703	up	--	--	IAA-Leu	2.74554	up	N-(3-Indolylacetyl)-L-leucine	--	--	0.850639	7.70927e-06	3
Cluster-9060.31	6.78529	up	--	--	IAA-Leu	2.74554	up	N-(3-Indolylacetyl)-L-leucine	--	--	0.818958	3.23179e-05	3
Cluster-90659.5	7.04724	up	--	--	IAA-Leu	2.74554	up	N-(3-Indolylacetyl)-L-leucine	--	--	0.804609	5.66829e-05	3
Cluster-90693.1	6.84262	up	--	--	IAA-Leu	2.74554	up	N-(3-Indolylacetyl)-L-leucine	--	--	0.800705	6.55328e-05	3
Cluster-91029.0	3.84298	up	--	--	IAA-Leu	2.74554	up	N-(3-Indolylacetyl)-L-leucine	--	--	0.803766	5.85041e-05	3
Cluster-91117.1	1.66647	up	--	--	IAA-Leu	2.74554	up	N-(3-Indolylacetyl)-L-leucine	--	--	0.84414	1.06079e-05	3
Cluster-91117.12	8.78804	up	--	--	IAA-Leu	2.74554	up	N-(3-Indolylacetyl)-L-leucine	--	--	0.826154	2.39338e-05	3
Cluster-91117.7	1.55107	up	--	--	IAA-Leu	2.74554	up	N-(3-Indolylacetyl)-L-leucine	--	--	0.803296	5.95383e-05	3
Cluster-91117.9	4.65776	up	--	--	IAA-Leu	2.74554	up	N-(3-Indolylacetyl)-L-leucine	--	--	0.830218	2.00787e-05	3
Cluster-91152.0	1.51864	up	--	--	IAA-Leu	2.74554	up	N-(3-Indolylacetyl)-L-leucine	--	--	0.850167	7.89374e-06	3
Cluster-91197.0	1.09455	up	--	--	IAA-Leu	2.74554	up	N-(3-Indolylacetyl)-L-leucine	--	--	0.822858	2.75086e-05	3
Cluster-91297.0	4.59189	up	--	--	IAA-Leu	2.74554	up	N-(3-Indolylacetyl)-L-leucine	--	--	0.836712	1.5019e-05	3
Cluster-91376.2	4.33701	up	K12126	ko04075,ko04712	IAA-Leu	2.74554	up	N-(3-Indolylacetyl)-L-leucine	--	--	0.820584	3.02323e-05	3
Cluster-91721.0	2.01557	up	--	--	IAA-Leu	2.74554	up	N-(3-Indolylacetyl)-L-leucine	--	--	0.888876	8.20613e-07	3
Cluster-91755.2	8.49607	up	--	--	IAA-Leu	2.74554	up	N-(3-Indolylacetyl)-L-leucine	--	--	0.801064	6.46724e-05	3
Cluster-91814.0	3.32986	up	--	--	IAA-Leu	2.74554	up	N-(3-Indolylacetyl)-L-leucine	--	--	0.814429	3.87869e-05	3
Cluster-91988.0	1.31661	up	--	--	IAA-Leu	2.74554	up	N-(3-Indolylacetyl)-L-leucine	--	--	0.811669	4.32454e-05	3
Cluster-92147.0	5.39735	up	--	--	IAA-Leu	2.74554	up	N-(3-Indolylacetyl)-L-leucine	--	--	0.855167	6.1174e-06	3
Cluster-92161.1	11.4414	up	K01859	ko00941,ko01100,ko01110	IAA-Leu	2.74554	up	N-(3-Indolylacetyl)-L-leucine	--	--	0.843213	1.1089e-05	3
Cluster-92601.2	2.27589	up	--	--	IAA-Leu	2.74554	up	N-(3-Indolylacetyl)-L-leucine	--	--	0.803261	5.96168e-05	3
Cluster-92736.0	1.45163	up	--	--	IAA-Leu	2.74554	up	N-(3-Indolylacetyl)-L-leucine	--	--	0.834433	1.6653e-05	3
Cluster-92826.6	8.92315	up	K05681	ko02010	IAA-Leu	2.74554	up	N-(3-Indolylacetyl)-L-leucine	--	--	0.819746	3.12923e-05	3
Cluster-92927.0	3.2431	up	--	--	IAA-Leu	2.74554	up	N-(3-Indolylacetyl)-L-leucine	--	--	0.89567	5.06461e-07	3
Cluster-93070.0	1.67319	up	K14300	ko03013	IAA-Leu	2.74554	up	N-(3-Indolylacetyl)-L-leucine	--	--	0.865631	3.47533e-06	3
Cluster-93415.0	6.35015	up	K13071	ko00860,ko01110	IAA-Leu	2.74554	up	N-(3-Indolylacetyl)-L-leucine	--	--	0.831172	1.92549e-05	3
Cluster-93443.87	5.6001	up	K00801	ko00100,ko00909,ko01100,ko01110	IAA-Leu	2.74554	up	N-(3-Indolylacetyl)-L-leucine	--	--	0.825475	2.46363e-05	3
Cluster-93727.0	3.02774	up	K14487	ko04075	IAA-Leu	2.74554	up	N-(3-Indolylacetyl)-L-leucine	--	--	0.903114	2.86981e-07	3
Cluster-93810.0	2.78562	up	--	--	IAA-Leu	2.74554	up	N-(3-Indolylacetyl)-L-leucine	--	--	0.893851	5.78128e-07	3
Cluster-93823.0	1.70582	up	--	--	IAA-Leu	2.74554	up	N-(3-Indolylacetyl)-L-leucine	--	--	0.843222	1.10839e-05	3
Cluster-93855.0	4.23589	up	K14515	ko04016,ko04075	IAA-Leu	2.74554	up	N-(3-Indolylacetyl)-L-leucine	--	--	0.821685	2.88867e-05	3
Cluster-94065.0	3.71234	up	--	--	IAA-Leu	2.74554	up	N-(3-Indolylacetyl)-L-leucine	--	--	0.83024	2.00588e-05	3
Cluster-94219.1	3.5588	up	K10781	ko00061,ko01100,ko01212	IAA-Leu	2.74554	up	N-(3-Indolylacetyl)-L-leucine	--	--	0.955559	6.65312e-10	3
Cluster-94226.0	6.06529	up	--	--	IAA-Leu	2.74554	up	N-(3-Indolylacetyl)-L-leucine	--	--	0.883653	1.165e-06	3
Cluster-94765.11	5.24303	up	--	--	IAA-Leu	2.74554	up	N-(3-Indolylacetyl)-L-leucine	--	--	0.826902	2.31805e-05	3
Cluster-94765.13	8.69985	up	--	--	IAA-Leu	2.74554	up	N-(3-Indolylacetyl)-L-leucine	--	--	0.802499	6.13301e-05	3
Cluster-94765.14	7.18164	up	--	--	IAA-Leu	2.74554	up	N-(3-Indolylacetyl)-L-leucine	--	--	0.843213	1.10889e-05	3
Cluster-94911.0	3.89149	up	--	--	IAA-Leu	2.74554	up	N-(3-Indolylacetyl)-L-leucine	--	--	0.874559	2.0647e-06	3
Cluster-95005.5	6.82802	up	--	--	IAA-Leu	2.74554	up	N-(3-Indolylacetyl)-L-leucine	--	--	0.821529	2.90737e-05	3
Cluster-95165.6	6.15044	up	--	--	IAA-Leu	2.74554	up	N-(3-Indolylacetyl)-L-leucine	--	--	0.805592	5.46233e-05	3
Cluster-95165.8	1.30912	up	--	--	IAA-Leu	2.74554	up	N-(3-Indolylacetyl)-L-leucine	--	--	0.892304	6.45809e-07	3
Cluster-95248.0	1.43525	up	--	--	IAA-Leu	2.74554	up	N-(3-Indolylacetyl)-L-leucine	--	--	0.901747	3.19606e-07	3
Cluster-95865.7	3.73238	up	--	--	IAA-Leu	2.74554	up	N-(3-Indolylacetyl)-L-leucine	--	--	0.877615	1.71205e-06	3
Cluster-96044.1	3.41065	up	--	--	IAA-Leu	2.74554	up	N-(3-Indolylacetyl)-L-leucine	--	--	0.827231	2.28552e-05	3
Cluster-96177.0	7.53482	up	--	--	IAA-Leu	2.74554	up	N-(3-Indolylacetyl)-L-leucine	--	--	0.830533	1.98032e-05	3
Cluster-96334.20	8.23604	up	--	--	IAA-Leu	2.74554	up	N-(3-Indolylacetyl)-L-leucine	--	--	0.828239	2.1884e-05	3
Cluster-96397.87	8.81486	up	--	--	IAA-Leu	2.74554	up	N-(3-Indolylacetyl)-L-leucine	--	--	0.800313	6.64834e-05	3
Cluster-96467.8	2.86306	up	K15397	ko00062,ko01100,ko01110,ko04626	IAA-Leu	2.74554	up	N-(3-Indolylacetyl)-L-leucine	--	--	0.851284	7.46285e-06	3
Cluster-96565.1	1.42668	up	--	--	IAA-Leu	2.74554	up	N-(3-Indolylacetyl)-L-leucine	--	--	0.892287	6.46619e-07	3
Cluster-96812.4	3.21839	up	K23260	ko00999,ko01110	IAA-Leu	2.74554	up	N-(3-Indolylacetyl)-L-leucine	--	--	0.847316	9.09205e-06	3
Cluster-97397.0	1.16885	up	K20718	ko04016	IAA-Leu	2.74554	up	N-(3-Indolylacetyl)-L-leucine	--	--	0.918204	7.77621e-08	3
Cluster-97409.0	2.67145	up	--	--	IAA-Leu	2.74554	up	N-(3-Indolylacetyl)-L-leucine	--	--	0.836381	1.52477e-05	3
Cluster-97412.3	4.23952	up	--	--	IAA-Leu	2.74554	up	N-(3-Indolylacetyl)-L-leucine	--	--	0.80144	6.37827e-05	3
Cluster-97420.4	2.49189	up	K13066	ko00380,ko00940,ko01100,ko01110	IAA-Leu	2.74554	up	N-(3-Indolylacetyl)-L-leucine	--	--	0.923436	4.66057e-08	3
Cluster-97751.0	4.84143	up	--	--	IAA-Leu	2.74554	up	N-(3-Indolylacetyl)-L-leucine	--	--	0.864199	3.7651e-06	3
Cluster-97932.0	6.99425	up	--	--	IAA-Leu	2.74554	up	N-(3-Indolylacetyl)-L-leucine	--	--	0.832604	1.80729e-05	3
Cluster-9800.19	4.96628	up	K15918	ko00260,ko00561,ko00630,ko01100,ko01110,ko01200	IAA-Leu	2.74554	up	N-(3-Indolylacetyl)-L-leucine	--	--	0.834503	1.66009e-05	3
Cluster-98099.0	3.41456	up	--	--	IAA-Leu	2.74554	up	N-(3-Indolylacetyl)-L-leucine	--	--	0.818036	3.35554e-05	3
Cluster-98108.0	5.95504	up	K15397	ko00062,ko01100,ko01110,ko04626	IAA-Leu	2.74554	up	N-(3-Indolylacetyl)-L-leucine	--	--	0.913239	1.22625e-07	3
Cluster-98204.1	7.30053	up	K14486	ko04075	IAA-Leu	2.74554	up	N-(3-Indolylacetyl)-L-leucine	--	--	0.813698	3.99272e-05	3
Cluster-98204.4	1.52369	up	K14486	ko04075	IAA-Leu	2.74554	up	N-(3-Indolylacetyl)-L-leucine	--	--	0.882225	1.2784e-06	3
Cluster-98204.7	6.14955	up	K14486	ko04075	IAA-Leu	2.74554	up	N-(3-Indolylacetyl)-L-leucine	--	--	0.853794	6.56706e-06	3
Cluster-98261.1	7.59378	up	--	--	IAA-Leu	2.74554	up	N-(3-Indolylacetyl)-L-leucine	--	--	0.825535	2.4573e-05	3
Cluster-98329.0	9.27051	up	--	--	IAA-Leu	2.74554	up	N-(3-Indolylacetyl)-L-leucine	--	--	0.812869	4.12557e-05	3
Cluster-98447.0	6.102	up	--	--	IAA-Leu	2.74554	up	N-(3-Indolylacetyl)-L-leucine	--	--	0.823747	2.65027e-05	3
Cluster-9884.1	8.6136	up	--	--	IAA-Leu	2.74554	up	N-(3-Indolylacetyl)-L-leucine	--	--	0.807359	5.10788e-05	3
Cluster-98962.4	1.43891	up	K05298	ko00710,ko01100,ko01200	IAA-Leu	2.74554	up	N-(3-Indolylacetyl)-L-leucine	--	--	0.91658	9.05364e-08	3
Cluster-99000.0	1.86052	up	K02433	ko00970,ko01100	IAA-Leu	2.74554	up	N-(3-Indolylacetyl)-L-leucine	--	--	0.928463	2.75098e-08	3
Cluster-99038.0	2.20178	up	--	--	IAA-Leu	2.74554	up	N-(3-Indolylacetyl)-L-leucine	--	--	0.827474	2.26178e-05	3
Cluster-99060.2	2.68463	up	K14432	ko04075	IAA-Leu	2.74554	up	N-(3-Indolylacetyl)-L-leucine	--	--	0.849547	8.14203e-06	3
Cluster-99134.0	3.72577	up	--	--	IAA-Leu	2.74554	up	N-(3-Indolylacetyl)-L-leucine	--	--	0.801471	6.3709e-05	3
Cluster-99460.1	11.7701	up	--	--	IAA-Leu	2.74554	up	N-(3-Indolylacetyl)-L-leucine	--	--	0.8218	2.87489e-05	3
Cluster-99828.0	4.37096	up	K11866	ko04144	IAA-Leu	2.74554	up	N-(3-Indolylacetyl)-L-leucine	--	--	0.827198	2.28874e-05	3
Cluster-99849.3	4.23388	up	K19891	ko00500,ko01100	IAA-Leu	2.74554	up	N-(3-Indolylacetyl)-L-leucine	--	--	0.823512	2.67648e-05	3
Cluster-99896.1	2.79378	up	--	--	IAA-Leu	2.74554	up	N-(3-Indolylacetyl)-L-leucine	--	--	0.84009	1.28498e-05	3
Cluster-99896.8	2.2964	up	--	--	IAA-Leu	2.74554	up	N-(3-Indolylacetyl)-L-leucine	--	--	0.833408	1.74368e-05	3
Cluster-100006.11	2.13956	up	K00695	ko00500,ko01100,ko01110	GA3	2.74554	up	Gibberellin A3	C01699	ko00904,ko01110	0.889907	7.64207e-07	3
Cluster-100006.7	12.0752	up	K00695	ko00500,ko01100,ko01110	GA3	2.74554	up	Gibberellin A3	C01699	ko00904,ko01110	0.856033	5.84727e-06	3
Cluster-100124.1	7.31218	up	--	--	GA3	2.74554	up	Gibberellin A3	C01699	ko00904,ko01110	0.824213	2.59877e-05	3
Cluster-100159.1	6.90569	up	--	--	GA3	2.74554	up	Gibberellin A3	C01699	ko00904,ko01110	0.809155	4.76799e-05	3
Cluster-100164.0	1.41692	up	K01728	ko00040,ko01100	GA3	2.74554	up	Gibberellin A3	C01699	ko00904,ko01110	0.860587	4.58998e-06	3
Cluster-100169.2	1.16152	up	K12309	ko00052,ko00511,ko00531,ko00600,ko00604,ko01100	GA3	2.74554	up	Gibberellin A3	C01699	ko00904,ko01110	0.843696	1.0836e-05	3
Cluster-100188.3	2.1158	up	--	--	GA3	2.74554	up	Gibberellin A3	C01699	ko00904,ko01110	0.843253	1.10676e-05	3
Cluster-100197.2	7.26722	up	--	--	GA3	2.74554	up	Gibberellin A3	C01699	ko00904,ko01110	0.855824	5.91165e-06	3
Cluster-100203.0	1.7741	up	--	--	GA3	2.74554	up	Gibberellin A3	C01699	ko00904,ko01110	0.90519	2.42946e-07	3
Cluster-100322.1	7.51992	up	--	--	GA3	2.74554	up	Gibberellin A3	C01699	ko00904,ko01110	0.806922	5.19373e-05	3
Cluster-100330.2	3.91978	up	--	--	GA3	2.74554	up	Gibberellin A3	C01699	ko00904,ko01110	0.812639	4.16315e-05	3
Cluster-100402.1	9.162	up	K11352	ko00190,ko01100	GA3	2.74554	up	Gibberellin A3	C01699	ko00904,ko01110	0.803004	6.01892e-05	3
Cluster-100516.4	7.07294	up	--	--	GA3	2.74554	up	Gibberellin A3	C01699	ko00904,ko01110	0.819493	3.16185e-05	3
Cluster-100662.7	9.42481	up	--	--	GA3	2.74554	up	Gibberellin A3	C01699	ko00904,ko01110	0.81561	3.70018e-05	3
Cluster-100745.7	1.71504	up	K09590	ko00905,ko01100,ko01110	GA3	2.74554	up	Gibberellin A3	C01699	ko00904,ko01110	0.852118	7.15399e-06	3
Cluster-100805.1	3.94617	up	--	--	GA3	2.74554	up	Gibberellin A3	C01699	ko00904,ko01110	0.805814	5.41672e-05	3
Cluster-100863.5	11.3499	up	K14486	ko04075	GA3	2.74554	up	Gibberellin A3	C01699	ko00904,ko01110	0.865652	3.47122e-06	3
Cluster-100931.1	6.7611	up	--	--	GA3	2.74554	up	Gibberellin A3	C01699	ko00904,ko01110	0.835361	1.59701e-05	3
Cluster-101012.1	6.65985	up	K09578	ko03250	GA3	2.74554	up	Gibberellin A3	C01699	ko00904,ko01110	0.816969	3.50352e-05	3
Cluster-101048.3	7.0176	up	--	--	GA3	2.74554	up	Gibberellin A3	C01699	ko00904,ko01110	0.820246	3.06568e-05	3
Cluster-101049.6	7.79726	up	--	--	GA3	2.74554	up	Gibberellin A3	C01699	ko00904,ko01110	0.839367	1.32903e-05	3
Cluster-101052.0	5.7567	up	--	--	GA3	2.74554	up	Gibberellin A3	C01699	ko00904,ko01110	0.800587	6.58172e-05	3
Cluster-101089.5	9.80019	up	--	--	GA3	2.74554	up	Gibberellin A3	C01699	ko00904,ko01110	0.835731	1.5705e-05	3
Cluster-101272.2	7.16997	up	--	--	GA3	2.74554	up	Gibberellin A3	C01699	ko00904,ko01110	0.832686	1.8007e-05	3
Cluster-101411.0	3.74461	up	K03097	ko03008,ko04712	GA3	2.74554	up	Gibberellin A3	C01699	ko00904,ko01110	0.826227	2.38597e-05	3
Cluster-101460.3	7.19307	up	--	--	GA3	2.74554	up	Gibberellin A3	C01699	ko00904,ko01110	0.819425	3.17069e-05	3
Cluster-101507.2	7.01231	up	K00059	ko00061,ko00780,ko01100,ko01110,ko01212,ko01240	GA3	2.74554	up	Gibberellin A3	C01699	ko00904,ko01110	0.865512	3.49872e-06	3
Cluster-101555.3	7.38884	up	--	--	GA3	2.74554	up	Gibberellin A3	C01699	ko00904,ko01110	0.860474	4.61807e-06	3
Cluster-10179.2	9.67211	up	K12831	ko03040	GA3	2.74554	up	Gibberellin A3	C01699	ko00904,ko01110	0.832147	1.84426e-05	3
Cluster-101830.2	7.8361	up	--	--	GA3	2.74554	up	Gibberellin A3	C01699	ko00904,ko01110	0.834589	1.6537e-05	3
Cluster-101830.6	7.27048	up	--	--	GA3	2.74554	up	Gibberellin A3	C01699	ko00904,ko01110	0.860378	4.64225e-06	3
Cluster-101892.1	1.0775	up	K00207	ko00240,ko00410,ko00770,ko01100	GA3	2.74554	up	Gibberellin A3	C01699	ko00904,ko01110	0.877076	1.77015e-06	3
Cluster-101912.5	8.33932	up	--	--	GA3	2.74554	up	Gibberellin A3	C01699	ko00904,ko01110	0.808783	4.83684e-05	3
Cluster-102126.6	9.10006	up	--	--	GA3	2.74554	up	Gibberellin A3	C01699	ko00904,ko01110	0.82033	3.05503e-05	3
Cluster-102223.3	6.87913	up	--	--	GA3	2.74554	up	Gibberellin A3	C01699	ko00904,ko01110	0.825468	2.46432e-05	3
Cluster-102241.11	3.15627	up	--	--	GA3	2.74554	up	Gibberellin A3	C01699	ko00904,ko01110	0.86909	2.8532e-06	3
Cluster-102259.0	9.26787	up	K00059	ko00061,ko00780,ko01100,ko01110,ko01212,ko01240	GA3	2.74554	up	Gibberellin A3	C01699	ko00904,ko01110	0.819634	3.14372e-05	3
Cluster-102304.1	8.65024	up	K14399	ko03015	GA3	2.74554	up	Gibberellin A3	C01699	ko00904,ko01110	0.839768	1.30446e-05	3
Cluster-102309.1	5.79744	up	--	--	GA3	2.74554	up	Gibberellin A3	C01699	ko00904,ko01110	0.850251	7.8607e-06	3
Cluster-102359.0	7.21715	up	--	--	GA3	2.74554	up	Gibberellin A3	C01699	ko00904,ko01110	0.822569	2.78432e-05	3
Cluster-102389.0	10.2056	up	--	--	GA3	2.74554	up	Gibberellin A3	C01699	ko00904,ko01110	0.815775	3.67584e-05	3
Cluster-102640.2	7.00268	up	--	--	GA3	2.74554	up	Gibberellin A3	C01699	ko00904,ko01110	0.843143	1.11262e-05	3
Cluster-102752.1	1.0712	up	K19891	ko00500,ko01100	GA3	2.74554	up	Gibberellin A3	C01699	ko00904,ko01110	0.845334	1.00143e-05	3
Cluster-103052.0	6.19879	up	--	--	GA3	2.74554	up	Gibberellin A3	C01699	ko00904,ko01110	0.821132	2.95556e-05	3
Cluster-103094.0	9.99152	up	K13464	ko04075	GA3	2.74554	up	Gibberellin A3	C01699	ko00904,ko01110	0.848394	8.62192e-06	3
Cluster-103101.5	3.22315	up	K14432	ko04075	GA3	2.74554	up	Gibberellin A3	C01699	ko00904,ko01110	0.858319	5.18356e-06	3
Cluster-103162.1	5.59483	up	--	--	GA3	2.74554	up	Gibberellin A3	C01699	ko00904,ko01110	0.856518	5.70068e-06	3
Cluster-103178.0	4.07119	up	K23260	ko00999,ko01110	GA3	2.74554	up	Gibberellin A3	C01699	ko00904,ko01110	0.823738	2.65123e-05	3
Cluster-103232.0	8.79417	up	K13258	ko00943,ko01100,ko01110	GA3	2.74554	up	Gibberellin A3	C01699	ko00904,ko01110	0.801408	6.38573e-05	3
Cluster-103300.4	7.96316	up	--	--	GA3	2.74554	up	Gibberellin A3	C01699	ko00904,ko01110	0.841552	1.19979e-05	3
Cluster-103456.3	7.40007	up	K14399	ko03015	GA3	2.74554	up	Gibberellin A3	C01699	ko00904,ko01110	0.881194	1.36613e-06	3
Cluster-103462.1	8.34175	up	--	--	GA3	2.74554	up	Gibberellin A3	C01699	ko00904,ko01110	0.841525	1.20132e-05	3
Cluster-103722.1	8.12209	up	--	--	GA3	2.74554	up	Gibberellin A3	C01699	ko00904,ko01110	0.819769	3.12638e-05	3
Cluster-103756.0	1.7766	up	--	--	GA3	2.74554	up	Gibberellin A3	C01699	ko00904,ko01110	0.885553	1.02752e-06	3
Cluster-103791.0	6.14469	up	K14423	ko00100,ko01100,ko01110	GA3	2.74554	up	Gibberellin A3	C01699	ko00904,ko01110	0.874044	2.12993e-06	3
Cluster-103791.2	9.63075	up	K14423	ko00100,ko01100,ko01110	GA3	2.74554	up	Gibberellin A3	C01699	ko00904,ko01110	0.871038	2.5469e-06	3
Cluster-103903.1	9.16161	up	--	--	GA3	2.74554	up	Gibberellin A3	C01699	ko00904,ko01110	0.83621	1.53671e-05	3
Cluster-103978.0	7.29424	up	--	--	GA3	2.74554	up	Gibberellin A3	C01699	ko00904,ko01110	0.830025	2.02486e-05	3
Cluster-104051.1	7.31091	up	--	--	GA3	2.74554	up	Gibberellin A3	C01699	ko00904,ko01110	0.815419	3.72865e-05	3
Cluster-104112.13	6.53845	insig	K01176	ko00500,ko01100,ko01110	GA3	2.74554	up	Gibberellin A3	C01699	ko00904,ko01110	0.815431	3.7268e-05	3
Cluster-104187.1	4.94278	up	--	--	GA3	2.74554	up	Gibberellin A3	C01699	ko00904,ko01110	0.837543	1.44585e-05	3
Cluster-104363.2	1.50892	up	K13425	ko04016,ko04626	GA3	2.74554	up	Gibberellin A3	C01699	ko00904,ko01110	0.820693	3.00974e-05	3
Cluster-104363.4	6.97387	up	K13425	ko04016,ko04626	GA3	2.74554	up	Gibberellin A3	C01699	ko00904,ko01110	0.858428	5.15368e-06	3
Cluster-104363.5	1.75647	up	K13425	ko04016,ko04626	GA3	2.74554	up	Gibberellin A3	C01699	ko00904,ko01110	0.850181	7.88834e-06	3
Cluster-104396.1	7.06267	up	--	--	GA3	2.74554	up	Gibberellin A3	C01699	ko00904,ko01110	0.823653	2.66077e-05	3
Cluster-104419.2	1.80414	up	K12382	ko00600	GA3	2.74554	up	Gibberellin A3	C01699	ko00904,ko01110	0.831096	1.93193e-05	3
Cluster-104449.44	4.72167	up	--	--	GA3	2.74554	up	Gibberellin A3	C01699	ko00904,ko01110	0.81275	4.14504e-05	3
Cluster-104828.1	10.4011	up	K09587	ko00905,ko01100,ko01110	GA3	2.74554	up	Gibberellin A3	C01699	ko00904,ko01110	0.869741	2.74759e-06	3
Cluster-104846.8	3.37074	up	--	--	GA3	2.74554	up	Gibberellin A3	C01699	ko00904,ko01110	0.856352	5.75061e-06	3
Cluster-104944.0	9.41533	up	--	--	GA3	2.74554	up	Gibberellin A3	C01699	ko00904,ko01110	0.828145	2.19725e-05	3
Cluster-104944.10	2.30418	up	--	--	GA3	2.74554	up	Gibberellin A3	C01699	ko00904,ko01110	0.828582	2.15617e-05	3
Cluster-104950.1	7.70388	up	--	--	GA3	2.74554	up	Gibberellin A3	C01699	ko00904,ko01110	0.850988	7.57509e-06	3
Cluster-105084.1	7.68553	up	--	--	GA3	2.74554	up	Gibberellin A3	C01699	ko00904,ko01110	0.811655	4.32686e-05	3
Cluster-105221.1	4.28682	up	--	--	GA3	2.74554	up	Gibberellin A3	C01699	ko00904,ko01110	0.854934	6.19153e-06	3
Cluster-105312.2	6.9865	up	K00487	ko00130,ko00940,ko00941,ko00945,ko01100,ko01110	GA3	2.74554	up	Gibberellin A3	C01699	ko00904,ko01110	0.803289	5.95551e-05	3
Cluster-105331.5	1.90712	up	K02433	ko00970,ko01100	GA3	2.74554	up	Gibberellin A3	C01699	ko00904,ko01110	0.890458	7.35444e-07	3
Cluster-105343.5	9.67391	up	K02738	ko03050	GA3	2.74554	up	Gibberellin A3	C01699	ko00904,ko01110	0.801635	6.33259e-05	3
Cluster-105403.0	10.7599	up	K09754	ko00940,ko00941,ko00945,ko01100,ko01110	GA3	2.74554	up	Gibberellin A3	C01699	ko00904,ko01110	0.825471	2.46405e-05	3
Cluster-105444.0	9.05027	up	K20769	ko00073	GA3	2.74554	up	Gibberellin A3	C01699	ko00904,ko01110	0.829496	2.07218e-05	3
Cluster-105559.1	8.49387	up	K09832	ko00100,ko01100,ko01110	GA3	2.74554	up	Gibberellin A3	C01699	ko00904,ko01110	0.848321	8.65313e-06	3
Cluster-105587.1	9.55771	up	K22374	ko00999,ko01100,ko01110	GA3	2.74554	up	Gibberellin A3	C01699	ko00904,ko01110	0.824206	2.59952e-05	3
Cluster-105587.4	10.888	up	K22374	ko00999,ko01100,ko01110	GA3	2.74554	up	Gibberellin A3	C01699	ko00904,ko01110	0.818611	3.27791e-05	3
Cluster-105590.1	1.63074	up	K20728	ko04016	GA3	2.74554	up	Gibberellin A3	C01699	ko00904,ko01110	0.951259	1.37388e-09	3
Cluster-105599.1	7.89377	up	--	--	GA3	2.74554	up	Gibberellin A3	C01699	ko00904,ko01110	0.806066	5.36519e-05	3
Cluster-10562.11	8.38493	up	--	--	GA3	2.74554	up	Gibberellin A3	C01699	ko00904,ko01110	0.811461	4.35989e-05	3
Cluster-10562.16	2.19503	up	--	--	GA3	2.74554	up	Gibberellin A3	C01699	ko00904,ko01110	0.877114	1.76608e-06	3
Cluster-105668.3	11.1984	up	K01456	ko04141	GA3	2.74554	up	Gibberellin A3	C01699	ko00904,ko01110	0.851936	7.22069e-06	3
Cluster-105764.0	7.23609	up	--	--	GA3	2.74554	up	Gibberellin A3	C01699	ko00904,ko01110	0.874927	2.01914e-06	3
Cluster-105764.1	6.0003	up	--	--	GA3	2.74554	up	Gibberellin A3	C01699	ko00904,ko01110	0.836531	1.51436e-05	3
Cluster-105768.0	3.1635	up	--	--	GA3	2.74554	up	Gibberellin A3	C01699	ko00904,ko01110	0.800099	6.70069e-05	3
Cluster-105774.2	2.68642	up	--	--	GA3	2.74554	up	Gibberellin A3	C01699	ko00904,ko01110	0.858805	5.05125e-06	3
Cluster-105834.0	1.1831	up	K15544	ko03015	GA3	2.74554	up	Gibberellin A3	C01699	ko00904,ko01110	0.830164	2.01256e-05	3
Cluster-106060.0	8.97848	up	--	--	GA3	2.74554	up	Gibberellin A3	C01699	ko00904,ko01110	0.817087	3.48688e-05	3
Cluster-106060.5	10.4908	up	--	--	GA3	2.74554	up	Gibberellin A3	C01699	ko00904,ko01110	0.809758	4.65825e-05	3
Cluster-106083.2	1.45845	up	--	--	GA3	2.74554	up	Gibberellin A3	C01699	ko00904,ko01110	0.85714	5.51731e-06	3
Cluster-106117.2	8.45377	up	K04567	ko00970	GA3	2.74554	up	Gibberellin A3	C01699	ko00904,ko01110	0.857025	5.55082e-06	3
Cluster-106167.3	11.5402	up	--	--	GA3	2.74554	up	Gibberellin A3	C01699	ko00904,ko01110	0.859578	4.84636e-06	3
Cluster-106171.4	7.44098	up	--	--	GA3	2.74554	up	Gibberellin A3	C01699	ko00904,ko01110	0.80179	6.29637e-05	3
Cluster-106229.4	2.40919	up	--	--	GA3	2.74554	up	Gibberellin A3	C01699	ko00904,ko01110	0.819544	3.15529e-05	3
Cluster-106310.0	7.41134	up	K03809	ko00130,ko01100,ko01110,ko01240	GA3	2.74554	up	Gibberellin A3	C01699	ko00904,ko01110	0.846588	9.42237e-06	3
Cluster-106314.2	8.62158	up	--	--	GA3	2.74554	up	Gibberellin A3	C01699	ko00904,ko01110	0.801503	6.36338e-05	3
Cluster-106351.0	10.319	up	--	--	GA3	2.74554	up	Gibberellin A3	C01699	ko00904,ko01110	0.819007	3.22537e-05	3
Cluster-106445.4	9.78011	up	K00951	ko00230,ko01100	GA3	2.74554	up	Gibberellin A3	C01699	ko00904,ko01110	0.818666	3.27057e-05	3
Cluster-106468.2	7.54305	up	--	--	GA3	2.74554	up	Gibberellin A3	C01699	ko00904,ko01110	0.836979	1.48372e-05	3
Cluster-106674.6	10.1745	up	--	--	GA3	2.74554	up	Gibberellin A3	C01699	ko00904,ko01110	0.854638	6.28734e-06	3
Cluster-106769.3	6.63201	up	--	--	GA3	2.74554	up	Gibberellin A3	C01699	ko00904,ko01110	0.80767	5.04755e-05	3
Cluster-106909.0	9.9189	up	--	--	GA3	2.74554	up	Gibberellin A3	C01699	ko00904,ko01110	0.807049	5.16864e-05	3
Cluster-106909.5	8.53367	up	--	--	GA3	2.74554	up	Gibberellin A3	C01699	ko00904,ko01110	0.838625	1.37552e-05	3
Cluster-107002.3	11.2119	up	--	--	GA3	2.74554	up	Gibberellin A3	C01699	ko00904,ko01110	0.840561	1.25701e-05	3
Cluster-107030.0	3.51426	up	--	--	GA3	2.74554	up	Gibberellin A3	C01699	ko00904,ko01110	0.803402	5.93043e-05	3
Cluster-107030.1	7.98392	up	--	--	GA3	2.74554	up	Gibberellin A3	C01699	ko00904,ko01110	0.847658	8.94058e-06	3
Cluster-107090.1	10.0942	up	K01568	ko00010,ko01100,ko01110	GA3	2.74554	up	Gibberellin A3	C01699	ko00904,ko01110	0.800318	6.64718e-05	3
Cluster-107151.1	8.87656	up	K01507	ko00190	GA3	2.74554	up	Gibberellin A3	C01699	ko00904,ko01110	0.807181	5.14269e-05	3
Cluster-107250.1	12.7219	up	--	--	GA3	2.74554	up	Gibberellin A3	C01699	ko00904,ko01110	0.803743	5.85528e-05	3
Cluster-107260.0	4.89556	up	K23260	ko00999,ko01110	GA3	2.74554	up	Gibberellin A3	C01699	ko00904,ko01110	0.906101	2.25546e-07	3
Cluster-107332.0	1.11568	up	--	--	GA3	2.74554	up	Gibberellin A3	C01699	ko00904,ko01110	0.851127	7.522e-06	3
Cluster-107346.4	1.72385	up	K00847	ko00051,ko00500,ko00520,ko01100,ko01110,ko01250	GA3	2.74554	up	Gibberellin A3	C01699	ko00904,ko01110	0.800584	6.58239e-05	3
Cluster-107356.2	8.39434	up	--	--	GA3	2.74554	up	Gibberellin A3	C01699	ko00904,ko01110	0.805216	5.54041e-05	3
Cluster-107574.3	9.65814	up	K06617	ko00052,ko01100	GA3	2.74554	up	Gibberellin A3	C01699	ko00904,ko01110	0.837091	1.47611e-05	3
Cluster-107642.5	9.55988	up	--	--	GA3	2.74554	up	Gibberellin A3	C01699	ko00904,ko01110	0.804543	5.68241e-05	3
Cluster-107664.0	1.10436	up	--	--	GA3	2.74554	up	Gibberellin A3	C01699	ko00904,ko01110	0.811008	4.43758e-05	3
Cluster-107780.9	7.0672	up	--	--	GA3	2.74554	up	Gibberellin A3	C01699	ko00904,ko01110	0.830538	1.9799e-05	3
Cluster-107801.2	1.71968	up	K09580	ko04141	GA3	2.74554	up	Gibberellin A3	C01699	ko00904,ko01110	0.82477	2.53835e-05	3
Cluster-107801.5	10.1719	up	K09580	ko04141	GA3	2.74554	up	Gibberellin A3	C01699	ko00904,ko01110	0.838837	1.36211e-05	3
Cluster-107940.0	7.29972	up	--	--	GA3	2.74554	up	Gibberellin A3	C01699	ko00904,ko01110	0.844068	1.06444e-05	3
Cluster-107940.2	8.53718	up	--	--	GA3	2.74554	up	Gibberellin A3	C01699	ko00904,ko01110	0.860036	4.72847e-06	3
Cluster-107961.0	4.53579	up	--	--	GA3	2.74554	up	Gibberellin A3	C01699	ko00904,ko01110	0.869975	2.71034e-06	3
Cluster-108004.10	8.15173	up	K01824	ko00100,ko01100,ko01110	GA3	2.74554	up	Gibberellin A3	C01699	ko00904,ko01110	0.835098	1.61613e-05	3
Cluster-108004.3	9.4397	up	K01824	ko00100,ko01100,ko01110	GA3	2.74554	up	Gibberellin A3	C01699	ko00904,ko01110	0.85677	5.62596e-06	3
Cluster-108044.2	6.98189	up	--	--	GA3	2.74554	up	Gibberellin A3	C01699	ko00904,ko01110	0.810916	4.4536e-05	3
Cluster-108079.0	5.80408	up	--	--	GA3	2.74554	up	Gibberellin A3	C01699	ko00904,ko01110	0.828067	2.20467e-05	3
Cluster-108079.3	10.4063	up	--	--	GA3	2.74554	up	Gibberellin A3	C01699	ko00904,ko01110	0.857833	5.31908e-06	3
Cluster-108252.2	10.0567	up	K13430	ko04626	GA3	2.74554	up	Gibberellin A3	C01699	ko00904,ko01110	0.824222	2.59773e-05	3
Cluster-108314.2	7.68177	up	--	--	GA3	2.74554	up	Gibberellin A3	C01699	ko00904,ko01110	0.823112	2.72181e-05	3
Cluster-108343.0	7.89296	up	--	--	GA3	2.74554	up	Gibberellin A3	C01699	ko00904,ko01110	0.814021	3.94194e-05	3
Cluster-108345.1	3.30404	up	--	--	GA3	2.74554	up	Gibberellin A3	C01699	ko00904,ko01110	0.848908	8.40518e-06	3
Cluster-108373.2	6.76904	up	--	--	GA3	2.74554	up	Gibberellin A3	C01699	ko00904,ko01110	0.836324	1.52873e-05	3
Cluster-108373.7	7.91141	up	--	--	GA3	2.74554	up	Gibberellin A3	C01699	ko00904,ko01110	0.868129	3.01553e-06	3
Cluster-108438.4	1.77694	insig	K17839	ko00330,ko00410,ko00770,ko01100	GA3	2.74554	up	Gibberellin A3	C01699	ko00904,ko01110	0.874083	2.12489e-06	3
Cluster-108691.1	9.76686	up	K23260	ko00999,ko01110	GA3	2.74554	up	Gibberellin A3	C01699	ko00904,ko01110	0.869572	2.7746e-06	3
Cluster-108739.0	6.86511	up	--	--	GA3	2.74554	up	Gibberellin A3	C01699	ko00904,ko01110	0.806538	5.27014e-05	3
Cluster-108739.6	7.6518	up	--	--	GA3	2.74554	up	Gibberellin A3	C01699	ko00904,ko01110	0.817922	3.37098e-05	3
Cluster-108745.0	4.71125	up	K13415	ko04075	GA3	2.74554	up	Gibberellin A3	C01699	ko00904,ko01110	0.8265	2.35828e-05	3
Cluster-108817.8	7.6762	up	--	--	GA3	2.74554	up	Gibberellin A3	C01699	ko00904,ko01110	0.877336	1.74196e-06	3
Cluster-108821.0	1.90136	up	K13459	ko04626	GA3	2.74554	up	Gibberellin A3	C01699	ko00904,ko01110	0.833527	1.73439e-05	3
Cluster-108952.2	8.47954	up	K13260	ko00943,ko01100,ko01110	GA3	2.74554	up	Gibberellin A3	C01699	ko00904,ko01110	0.827753	2.23472e-05	3
Cluster-108959.5	4.50873	up	K08678	ko00520,ko01100,ko01250	GA3	2.74554	up	Gibberellin A3	C01699	ko00904,ko01110	0.857295	5.47256e-06	3
Cluster-109001.11	5.58383	up	--	--	GA3	2.74554	up	Gibberellin A3	C01699	ko00904,ko01110	0.806115	5.3554e-05	3
Cluster-109028.12	7.82023	up	--	--	GA3	2.74554	up	Gibberellin A3	C01699	ko00904,ko01110	0.844516	1.04177e-05	3
Cluster-109103.11	3.3465	up	--	--	GA3	2.74554	up	Gibberellin A3	C01699	ko00904,ko01110	0.801622	6.33552e-05	3
Cluster-109239.0	2.46669	up	--	--	GA3	2.74554	up	Gibberellin A3	C01699	ko00904,ko01110	0.880696	1.41031e-06	3
Cluster-109273.5	8.60998	up	--	--	GA3	2.74554	up	Gibberellin A3	C01699	ko00904,ko01110	0.804549	5.68126e-05	3
Cluster-109329.0	10.7072	up	K13448	ko04626	GA3	2.74554	up	Gibberellin A3	C01699	ko00904,ko01110	0.851028	7.55963e-06	3
Cluster-109329.3	8.84674	up	K13448	ko04626	GA3	2.74554	up	Gibberellin A3	C01699	ko00904,ko01110	0.835078	1.61761e-05	3
Cluster-109573.0	3.23644	up	--	--	GA3	2.74554	up	Gibberellin A3	C01699	ko00904,ko01110	0.872757	2.30068e-06	3
Cluster-109809.0	7.67793	up	--	--	GA3	2.74554	up	Gibberellin A3	C01699	ko00904,ko01110	0.832344	1.82822e-05	3
Cluster-110025.0	7.3054	up	--	--	GA3	2.74554	up	Gibberellin A3	C01699	ko00904,ko01110	0.832206	1.83949e-05	3
Cluster-110025.7	8.96746	up	--	--	GA3	2.74554	up	Gibberellin A3	C01699	ko00904,ko01110	0.808775	4.83832e-05	3
Cluster-110089.0	4.07938	up	K14494	ko04075	GA3	2.74554	up	Gibberellin A3	C01699	ko00904,ko01110	0.852268	7.09985e-06	3
Cluster-110103.3	3.93324	up	K13264	ko00943,ko00944	GA3	2.74554	up	Gibberellin A3	C01699	ko00904,ko01110	0.860088	4.7154e-06	3
Cluster-110106.6	9.03842	up	--	--	GA3	2.74554	up	Gibberellin A3	C01699	ko00904,ko01110	0.803699	5.86506e-05	3
Cluster-110113.1	7.47419	up	--	--	GA3	2.74554	up	Gibberellin A3	C01699	ko00904,ko01110	0.811932	4.28028e-05	3
Cluster-110227.14	6.83625	up	K01723	ko00592,ko01100,ko01110	GA3	2.74554	up	Gibberellin A3	C01699	ko00904,ko01110	0.802207	6.19984e-05	3
Cluster-110227.15	8.02905	up	K01723	ko00592,ko01100,ko01110	GA3	2.74554	up	Gibberellin A3	C01699	ko00904,ko01110	0.873235	2.23587e-06	3
Cluster-110267.2	5.74967	up	K00799	ko00480,ko01100	GA3	2.74554	up	Gibberellin A3	C01699	ko00904,ko01110	0.871367	2.49807e-06	3
Cluster-110267.3	3.29408	up	K00799	ko00480,ko01100	GA3	2.74554	up	Gibberellin A3	C01699	ko00904,ko01110	0.874335	2.09281e-06	3
Cluster-110302.0	4.48854	up	K08057	ko04141,ko04145	GA3	2.74554	up	Gibberellin A3	C01699	ko00904,ko01110	0.86967	2.75882e-06	3
Cluster-110350.5	4.25642	up	K14496	ko04016,ko04075	GA3	2.74554	up	Gibberellin A3	C01699	ko00904,ko01110	0.853952	6.51387e-06	3
Cluster-110358.8	2.08465	up	--	--	GA3	2.74554	up	Gibberellin A3	C01699	ko00904,ko01110	0.837062	1.4781e-05	3
Cluster-110376.3	6.25731	up	--	--	GA3	2.74554	up	Gibberellin A3	C01699	ko00904,ko01110	0.832824	1.78965e-05	3
Cluster-110496.6	5.00456	up	--	--	GA3	2.74554	up	Gibberellin A3	C01699	ko00904,ko01110	0.815989	3.64448e-05	3
Cluster-110526.12	9.21463	up	--	--	GA3	2.74554	up	Gibberellin A3	C01699	ko00904,ko01110	0.862893	4.04741e-06	3
Cluster-110526.6	7.42157	up	--	--	GA3	2.74554	up	Gibberellin A3	C01699	ko00904,ko01110	0.822507	2.79145e-05	3
Cluster-110526.7	2.92385	up	--	--	GA3	2.74554	up	Gibberellin A3	C01699	ko00904,ko01110	0.82528	2.48408e-05	3
Cluster-110543.4	11.0704	up	--	--	GA3	2.74554	up	Gibberellin A3	C01699	ko00904,ko01110	0.818219	3.33067e-05	3
Cluster-110552.3	2.79053	up	--	--	GA3	2.74554	up	Gibberellin A3	C01699	ko00904,ko01110	0.816181	3.61643e-05	3
Cluster-110576.1	9.47184	up	--	--	GA3	2.74554	up	Gibberellin A3	C01699	ko00904,ko01110	0.803708	5.86304e-05	3
Cluster-110686.1	9.20335	up	K03787	ko00230,ko00240,ko00760,ko01100,ko01110,ko01232	GA3	2.74554	up	Gibberellin A3	C01699	ko00904,ko01110	0.801026	6.47642e-05	3
Cluster-110812.0	12.6986	up	K01051	ko00040,ko01100	GA3	2.74554	up	Gibberellin A3	C01699	ko00904,ko01110	0.840566	1.25668e-05	3
Cluster-110843.1	9.13433	up	--	--	GA3	2.74554	up	Gibberellin A3	C01699	ko00904,ko01110	0.828754	2.14014e-05	3
Cluster-110843.4	8.5626	up	--	--	GA3	2.74554	up	Gibberellin A3	C01699	ko00904,ko01110	0.840252	1.27528e-05	3
Cluster-110936.3	7.72925	up	K20718	ko04016	GA3	2.74554	up	Gibberellin A3	C01699	ko00904,ko01110	0.862857	4.05539e-06	3
Cluster-110948.2	3.05067	up	K12373	ko00511,ko00513,ko00520,ko00531,ko00600,ko00603,ko00604,ko01100	GA3	2.74554	up	Gibberellin A3	C01699	ko00904,ko01110	0.864892	3.62239e-06	3
Cluster-111006.3	9.15887	up	K01188	ko00460,ko00500,ko00999,ko01100,ko01110	GA3	2.74554	up	Gibberellin A3	C01699	ko00904,ko01110	0.869215	2.83261e-06	3
Cluster-111080.5	5.46007	up	K00382	ko00010,ko00020,ko00260,ko00280,ko00310,ko00380,ko00620,ko00630,ko00640,ko01100,ko01110,ko01200,ko01240	GA3	2.74554	up	Gibberellin A3	C01699	ko00904,ko01110	0.817638	3.41014e-05	3
Cluster-111089.3	2.74476	up	K00511	ko00100,ko00909,ko01100,ko01110	GA3	2.74554	up	Gibberellin A3	C01699	ko00904,ko01110	0.81742	3.44025e-05	3
Cluster-111150.0	8.49872	up	--	--	GA3	2.74554	up	Gibberellin A3	C01699	ko00904,ko01110	0.801529	6.35726e-05	3
Cluster-111177.4	11.602	up	--	--	GA3	2.74554	up	Gibberellin A3	C01699	ko00904,ko01110	0.821417	2.92087e-05	3
Cluster-11122.19	9.5642	up	K00939	ko00230,ko00730,ko01100,ko01110,ko01232,ko01240	GA3	2.74554	up	Gibberellin A3	C01699	ko00904,ko01110	0.830793	1.95783e-05	3
Cluster-111289.0	7.07543	up	K06611	ko00052,ko01100	GA3	2.74554	up	Gibberellin A3	C01699	ko00904,ko01110	0.810081	4.60028e-05	3
Cluster-111329.0	2.7286	up	--	--	GA3	2.74554	up	Gibberellin A3	C01699	ko00904,ko01110	0.815998	3.64316e-05	3
Cluster-111333.11	10.2823	up	K01962	ko00061,ko00620,ko00640,ko01100,ko01110,ko01200,ko01212	GA3	2.74554	up	Gibberellin A3	C01699	ko00904,ko01110	0.864646	3.67266e-06	3
Cluster-111333.15	6.47525	up	--	--	GA3	2.74554	up	Gibberellin A3	C01699	ko00904,ko01110	0.866551	3.29945e-06	3
Cluster-111333.3	8.0506	up	K01962	ko00061,ko00620,ko00640,ko01100,ko01110,ko01200,ko01212	GA3	2.74554	up	Gibberellin A3	C01699	ko00904,ko01110	0.825315	2.48035e-05	3
Cluster-111505.15	2.33806	up	--	--	GA3	2.74554	up	Gibberellin A3	C01699	ko00904,ko01110	0.825039	2.50957e-05	3
Cluster-111513.1	9.35963	up	--	--	GA3	2.74554	up	Gibberellin A3	C01699	ko00904,ko01110	0.870892	2.56887e-06	3
Cluster-111575.28	7.50817	up	K00020	ko00280,ko01100	GA3	2.74554	up	Gibberellin A3	C01699	ko00904,ko01110	0.817486	3.43111e-05	3
Cluster-111659.19	8.44894	up	K02303	ko00860,ko01100,ko01110,ko01240	GA3	2.74554	up	Gibberellin A3	C01699	ko00904,ko01110	0.838812	1.36366e-05	3
Cluster-111663.0	8.98803	up	--	--	GA3	2.74554	up	Gibberellin A3	C01699	ko00904,ko01110	0.817419	3.44046e-05	3
Cluster-111663.3	10.4558	up	--	--	GA3	2.74554	up	Gibberellin A3	C01699	ko00904,ko01110	0.814547	3.86046e-05	3
Cluster-111777.0	5.18618	up	--	--	GA3	2.74554	up	Gibberellin A3	C01699	ko00904,ko01110	0.820762	3.00119e-05	3
Cluster-111788.2	8.81889	up	K05928	ko00130,ko01100,ko01110,ko01240	GA3	2.74554	up	Gibberellin A3	C01699	ko00904,ko01110	0.830322	1.99877e-05	3
Cluster-111909.0	1.18783	up	--	--	GA3	2.74554	up	Gibberellin A3	C01699	ko00904,ko01110	0.860925	4.50683e-06	3
Cluster-112002.3	1.55857	up	--	--	GA3	2.74554	up	Gibberellin A3	C01699	ko00904,ko01110	0.871554	2.47071e-06	3
Cluster-112022.4	5.03024	up	--	--	GA3	2.74554	up	Gibberellin A3	C01699	ko00904,ko01110	0.870779	2.5859e-06	3
Cluster-112039.0	7.45438	up	--	--	GA3	2.74554	up	Gibberellin A3	C01699	ko00904,ko01110	0.815215	3.75913e-05	3
Cluster-112043.0	1.36996	up	K23947	ko00380	GA3	2.74554	up	Gibberellin A3	C01699	ko00904,ko01110	0.853504	6.66561e-06	3
Cluster-112044.6	3.88529	up	K13430	ko04626	GA3	2.74554	up	Gibberellin A3	C01699	ko00904,ko01110	0.821407	2.92217e-05	3
Cluster-112046.1	6.85875	up	--	--	GA3	2.74554	up	Gibberellin A3	C01699	ko00904,ko01110	0.802139	6.21551e-05	3
Cluster-112076.11	7.35829	up	K14413	ko00513,ko01100	GA3	2.74554	up	Gibberellin A3	C01699	ko00904,ko01110	0.869673	2.75838e-06	3
Cluster-112076.9	6.59407	up	K14413	ko00513,ko01100	GA3	2.74554	up	Gibberellin A3	C01699	ko00904,ko01110	0.847305	9.09718e-06	3
Cluster-112082.3	3.37322	insig	--	--	GA3	2.74554	up	Gibberellin A3	C01699	ko00904,ko01110	0.826573	2.35094e-05	3
Cluster-112085.10	1.41913	up	--	--	GA3	2.74554	up	Gibberellin A3	C01699	ko00904,ko01110	0.828122	2.19943e-05	3
Cluster-112085.2	2.34199	up	--	--	GA3	2.74554	up	Gibberellin A3	C01699	ko00904,ko01110	0.819497	3.1614e-05	3
Cluster-11210.3	5.52345	up	--	--	GA3	2.74554	up	Gibberellin A3	C01699	ko00904,ko01110	0.801625	6.33483e-05	3
Cluster-112186.0	7.72284	up	--	--	GA3	2.74554	up	Gibberellin A3	C01699	ko00904,ko01110	0.825895	2.41998e-05	3
Cluster-112186.13	7.08527	up	--	--	GA3	2.74554	up	Gibberellin A3	C01699	ko00904,ko01110	0.850207	7.87819e-06	3
Cluster-112239.11	5.03017	up	--	--	GA3	2.74554	up	Gibberellin A3	C01699	ko00904,ko01110	0.82657	2.35126e-05	3
Cluster-112239.9	9.78557	up	--	--	GA3	2.74554	up	Gibberellin A3	C01699	ko00904,ko01110	0.834849	1.63445e-05	3
Cluster-112271.0	3.73595	insig	--	--	GA3	2.74554	up	Gibberellin A3	C01699	ko00904,ko01110	0.817022	3.49613e-05	3
Cluster-112413.2	7.67209	up	--	--	GA3	2.74554	up	Gibberellin A3	C01699	ko00904,ko01110	0.815247	3.75431e-05	3
Cluster-112448.3	6.96449	up	--	--	GA3	2.74554	up	Gibberellin A3	C01699	ko00904,ko01110	0.851298	7.4575e-06	3
Cluster-112461.2	9.22183	up	--	--	GA3	2.74554	up	Gibberellin A3	C01699	ko00904,ko01110	0.813661	3.99865e-05	3
Cluster-112465.0	7.69514	up	K00432	ko00480,ko00590,ko01100	GA3	2.74554	up	Gibberellin A3	C01699	ko00904,ko01110	0.817632	3.41086e-05	3
Cluster-112529.0	4.19107	up	K14484	ko04075	GA3	2.74554	up	Gibberellin A3	C01699	ko00904,ko01110	0.915266	1.02159e-07	3
Cluster-112610.17	2.88678	insig	--	--	GA3	2.74554	up	Gibberellin A3	C01699	ko00904,ko01110	0.820594	3.02205e-05	3
Cluster-112628.1	8.27772	up	K02260	ko00190,ko01100	GA3	2.74554	up	Gibberellin A3	C01699	ko00904,ko01110	0.840144	1.28175e-05	3
Cluster-112668.2	5.20194	up	--	--	GA3	2.74554	up	Gibberellin A3	C01699	ko00904,ko01110	0.816643	3.54988e-05	3
Cluster-112744.8	8.56753	up	K00208	ko00061,ko00780,ko01100,ko01110,ko01212,ko01240	GA3	2.74554	up	Gibberellin A3	C01699	ko00904,ko01110	0.811609	4.33467e-05	3
Cluster-112832.0	5.78158	up	--	--	GA3	2.74554	up	Gibberellin A3	C01699	ko00904,ko01110	0.81647	3.57478e-05	3
Cluster-112893.2	7.23291	up	--	--	GA3	2.74554	up	Gibberellin A3	C01699	ko00904,ko01110	0.846241	9.58276e-06	3
Cluster-112961.0	2.46786	up	--	--	GA3	2.74554	up	Gibberellin A3	C01699	ko00904,ko01110	0.85838	5.1667e-06	3
Cluster-112963.3	2.18479	up	K10144	ko04120	GA3	2.74554	up	Gibberellin A3	C01699	ko00904,ko01110	0.816857	3.51949e-05	3
Cluster-113074.0	4.25757	up	K12382	ko00600	GA3	2.74554	up	Gibberellin A3	C01699	ko00904,ko01110	0.832252	1.83572e-05	3
Cluster-113105.1	7.48274	up	K20769	ko00073	GA3	2.74554	up	Gibberellin A3	C01699	ko00904,ko01110	0.816288	3.60096e-05	3
Cluster-113105.4	7.6779	up	K20769	ko00073	GA3	2.74554	up	Gibberellin A3	C01699	ko00904,ko01110	0.829799	2.04501e-05	3
Cluster-113297.1	7.22126	up	--	--	GA3	2.74554	up	Gibberellin A3	C01699	ko00904,ko01110	0.834838	1.63523e-05	3
Cluster-113317.5	8.86135	up	K10775	ko00360,ko00940,ko01100,ko01110	GA3	2.74554	up	Gibberellin A3	C01699	ko00904,ko01110	0.879086	1.5617e-06	3
Cluster-113317.6	2.95737	up	K10775	ko00360,ko00940,ko01100,ko01110	GA3	2.74554	up	Gibberellin A3	C01699	ko00904,ko01110	0.904954	2.47641e-07	3
Cluster-113317.7	7.7966	up	K10775	ko00360,ko00940,ko01100,ko01110	GA3	2.74554	up	Gibberellin A3	C01699	ko00904,ko01110	0.873865	2.15298e-06	3
Cluster-113350.5	3.07885	up	K01568	ko00010,ko01100,ko01110	GA3	2.74554	up	Gibberellin A3	C01699	ko00904,ko01110	0.831798	1.87303e-05	3
Cluster-113351.3	10.1462	up	K09587	ko00905,ko01100,ko01110	GA3	2.74554	up	Gibberellin A3	C01699	ko00904,ko01110	0.876358	1.85031e-06	3
Cluster-113364.0	1.39991	up	--	--	GA3	2.74554	up	Gibberellin A3	C01699	ko00904,ko01110	0.809103	4.77759e-05	3
Cluster-113459.0	7.10295	up	K13346	ko04146	GA3	2.74554	up	Gibberellin A3	C01699	ko00904,ko01110	0.815283	3.74885e-05	3
Cluster-113475.3	8.39483	up	--	--	GA3	2.74554	up	Gibberellin A3	C01699	ko00904,ko01110	0.850243	7.86383e-06	3
Cluster-11350.45	1.97794	up	K12309	ko00052,ko00511,ko00531,ko00600,ko00604,ko01100	GA3	2.74554	up	Gibberellin A3	C01699	ko00904,ko01110	0.836287	1.53128e-05	3
Cluster-113575.2	6.1176	up	K00660	ko00941,ko00960,ko01100,ko01110,ko04712	GA3	2.74554	up	Gibberellin A3	C01699	ko00904,ko01110	0.861137	4.45513e-06	3
Cluster-113591.2	12.8135	up	K01074	ko00062,ko01100,ko01212	GA3	2.74554	up	Gibberellin A3	C01699	ko00904,ko01110	0.8023	6.17847e-05	3
Cluster-113670.2	8.02948	up	--	--	GA3	2.74554	up	Gibberellin A3	C01699	ko00904,ko01110	0.858043	5.26016e-06	3
Cluster-113670.3	2.10645	insig	--	--	GA3	2.74554	up	Gibberellin A3	C01699	ko00904,ko01110	0.837974	1.4175e-05	3
Cluster-113670.5	8.20301	up	K13415	ko04075	GA3	2.74554	up	Gibberellin A3	C01699	ko00904,ko01110	0.871437	2.4879e-06	3
Cluster-113685.0	9.70592	up	--	--	GA3	2.74554	up	Gibberellin A3	C01699	ko00904,ko01110	0.844536	1.04078e-05	3
Cluster-113725.1	7.10547	up	--	--	GA3	2.74554	up	Gibberellin A3	C01699	ko00904,ko01110	0.81463	3.84774e-05	3
Cluster-113725.2	4.65196	up	--	--	GA3	2.74554	up	Gibberellin A3	C01699	ko00904,ko01110	0.82049	3.03497e-05	3
Cluster-113843.0	1.78799	up	--	--	GA3	2.74554	up	Gibberellin A3	C01699	ko00904,ko01110	0.869981	2.70935e-06	3
Cluster-113917.4	10.2578	up	--	--	GA3	2.74554	up	Gibberellin A3	C01699	ko00904,ko01110	0.820428	3.04273e-05	3
Cluster-114010.4	1.54036	up	K03879	ko00190,ko01100	GA3	2.74554	up	Gibberellin A3	C01699	ko00904,ko01110	0.832336	1.82893e-05	3
Cluster-114206.4	9.7209	up	--	--	GA3	2.74554	up	Gibberellin A3	C01699	ko00904,ko01110	0.819	3.22637e-05	3
Cluster-114216.0	1.44568	insig	--	--	GA3	2.74554	up	Gibberellin A3	C01699	ko00904,ko01110	0.8866	9.57988e-07	3
Cluster-114222.1	9.18107	up	K13070	ko00904,ko01110	GA3	2.74554	up	Gibberellin A3	C01699	ko00904,ko01110	0.802631	6.103e-05	3
Cluster-114222.4	8.79976	up	K13070	ko00904,ko01110	GA3	2.74554	up	Gibberellin A3	C01699	ko00904,ko01110	0.807005	5.17734e-05	3
Cluster-114230.2	9.10582	up	K05665	ko02010	GA3	2.74554	up	Gibberellin A3	C01699	ko00904,ko01110	0.832202	1.8398e-05	3
Cluster-114251.1	9.98623	up	K01913	ko00010,ko00620,ko00630,ko00650,ko01100,ko01110,ko01200	GA3	2.74554	up	Gibberellin A3	C01699	ko00904,ko01110	0.831485	1.89909e-05	3
Cluster-114262.0	8.87284	up	K02183	ko04016,ko04070,ko04626	GA3	2.74554	up	Gibberellin A3	C01699	ko00904,ko01110	0.820229	3.06778e-05	3
Cluster-114415.0	9.90217	up	K14498	ko04016,ko04075	GA3	2.74554	up	Gibberellin A3	C01699	ko00904,ko01110	0.859337	4.90948e-06	3
Cluster-114565.1	8.92718	up	--	--	GA3	2.74554	up	Gibberellin A3	C01699	ko00904,ko01110	0.852452	7.03356e-06	3
Cluster-114582.5	9.60814	up	K22771	ko00944	GA3	2.74554	up	Gibberellin A3	C01699	ko00904,ko01110	0.809874	4.63741e-05	3
Cluster-114697.1	3.47345	up	K13342	ko04146	GA3	2.74554	up	Gibberellin A3	C01699	ko00904,ko01110	0.88597	9.99312e-07	3
Cluster-114719.3	3.0025	up	K00382	ko00010,ko00020,ko00260,ko00280,ko00310,ko00380,ko00620,ko00630,ko00640,ko01100,ko01110,ko01200,ko01240	GA3	2.74554	up	Gibberellin A3	C01699	ko00904,ko01110	0.830832	1.95452e-05	3
Cluster-114728.7	9.85108	up	K10532	ko00531,ko01100	GA3	2.74554	up	Gibberellin A3	C01699	ko00904,ko01110	0.823334	2.6966e-05	3
Cluster-114728.8	8.10172	up	K10532	ko00531,ko01100	GA3	2.74554	up	Gibberellin A3	C01699	ko00904,ko01110	0.849941	7.9837e-06	3
Cluster-114765.1	1.97313	up	--	--	GA3	2.74554	up	Gibberellin A3	C01699	ko00904,ko01110	0.805373	5.50772e-05	3
Cluster-114997.2	9.27358	up	--	--	GA3	2.74554	up	Gibberellin A3	C01699	ko00904,ko01110	0.84377	1.07978e-05	3
Cluster-114997.3	9.54405	up	--	--	GA3	2.74554	up	Gibberellin A3	C01699	ko00904,ko01110	0.84135	1.21128e-05	3
Cluster-115062.2	1.29803	up	--	--	GA3	2.74554	up	Gibberellin A3	C01699	ko00904,ko01110	0.859293	4.92115e-06	3
Cluster-115273.3	9.12654	up	K18081	ko00562,ko01100,ko04070	GA3	2.74554	up	Gibberellin A3	C01699	ko00904,ko01110	0.801644	6.33032e-05	3
Cluster-115276.0	8.41307	up	K01051	ko00040,ko01100	GA3	2.74554	up	Gibberellin A3	C01699	ko00904,ko01110	0.870732	2.59305e-06	3
Cluster-115285.0	7.56277	up	K02872	ko03010	GA3	2.74554	up	Gibberellin A3	C01699	ko00904,ko01110	0.834711	1.64461e-05	3
Cluster-115371.3	9.01074	up	--	--	GA3	2.74554	up	Gibberellin A3	C01699	ko00904,ko01110	0.81268	4.15647e-05	3
Cluster-115592.2	7.66796	up	K22097	ko00950,ko01100,ko01110	GA3	2.74554	up	Gibberellin A3	C01699	ko00904,ko01110	0.800578	6.58384e-05	3
Cluster-115657.2	7.14008	up	--	--	GA3	2.74554	up	Gibberellin A3	C01699	ko00904,ko01110	0.850107	7.91767e-06	3
Cluster-115697.4	3.6525	insig	K00006	ko00564,ko01110	GA3	2.74554	up	Gibberellin A3	C01699	ko00904,ko01110	0.866853	3.24337e-06	3
Cluster-115697.7	8.05679	up	K00006	ko00564,ko01110	GA3	2.74554	up	Gibberellin A3	C01699	ko00904,ko01110	0.816269	3.60374e-05	3
Cluster-115791.4	7.34913	up	K13448	ko04626	GA3	2.74554	up	Gibberellin A3	C01699	ko00904,ko01110	0.814723	3.83365e-05	3
Cluster-115816.7	3.17231	up	--	--	GA3	2.74554	up	Gibberellin A3	C01699	ko00904,ko01110	0.812792	4.13818e-05	3
Cluster-115961.2	2.53052	up	K07953	ko04141	GA3	2.74554	up	Gibberellin A3	C01699	ko00904,ko01110	0.826909	2.31733e-05	3
Cluster-115982.1	8.69812	up	K00059	ko00061,ko00780,ko01100,ko01110,ko01212,ko01240	GA3	2.74554	up	Gibberellin A3	C01699	ko00904,ko01110	0.873136	2.24918e-06	3
Cluster-115992.2	9.41267	up	--	--	GA3	2.74554	up	Gibberellin A3	C01699	ko00904,ko01110	0.864338	3.73617e-06	3
Cluster-116031.1	7.45683	up	K20558	ko04016	GA3	2.74554	up	Gibberellin A3	C01699	ko00904,ko01110	0.810325	4.55706e-05	3
Cluster-116062.1	4.4199	up	--	--	GA3	2.74554	up	Gibberellin A3	C01699	ko00904,ko01110	0.809265	4.74783e-05	3
Cluster-116199.3	8.10082	up	--	--	GA3	2.74554	up	Gibberellin A3	C01699	ko00904,ko01110	0.882291	1.27297e-06	3
Cluster-116289.1	9.37208	up	--	--	GA3	2.74554	up	Gibberellin A3	C01699	ko00904,ko01110	0.828426	2.17073e-05	3
Cluster-116297.2	9.17048	up	K01673	ko00910,ko01100	GA3	2.74554	up	Gibberellin A3	C01699	ko00904,ko01110	0.850725	7.67569e-06	3
Cluster-116297.4	7.71839	up	K01673	ko00910,ko01100	GA3	2.74554	up	Gibberellin A3	C01699	ko00904,ko01110	0.858335	5.17923e-06	3
Cluster-116343.2	4.08509	up	--	--	GA3	2.74554	up	Gibberellin A3	C01699	ko00904,ko01110	0.868784	2.90405e-06	3
Cluster-116343.4	1.05185	up	--	--	GA3	2.74554	up	Gibberellin A3	C01699	ko00904,ko01110	0.861025	4.48249e-06	3
Cluster-116343.5	8.42699	up	--	--	GA3	2.74554	up	Gibberellin A3	C01699	ko00904,ko01110	0.872275	2.36748e-06	3
Cluster-116440.5	7.79868	up	K13264	ko00943,ko00944	GA3	2.74554	up	Gibberellin A3	C01699	ko00904,ko01110	0.834022	1.69635e-05	3
Cluster-116458.5	2.10534	up	--	--	GA3	2.74554	up	Gibberellin A3	C01699	ko00904,ko01110	0.895314	5.19869e-07	3
Cluster-116516.1	6.85466	up	--	--	GA3	2.74554	up	Gibberellin A3	C01699	ko00904,ko01110	0.833889	1.70648e-05	3
Cluster-116577.1	8.35132	up	--	--	GA3	2.74554	up	Gibberellin A3	C01699	ko00904,ko01110	0.838036	1.41346e-05	3
Cluster-116577.2	7.96558	up	--	--	GA3	2.74554	up	Gibberellin A3	C01699	ko00904,ko01110	0.857932	5.29117e-06	3
Cluster-116579.1	9.60094	up	K14493	ko04075	GA3	2.74554	up	Gibberellin A3	C01699	ko00904,ko01110	0.841917	1.17928e-05	3
Cluster-116579.6	9.09832	up	K14493	ko04075	GA3	2.74554	up	Gibberellin A3	C01699	ko00904,ko01110	0.813054	4.09571e-05	3
Cluster-116688.4	9.90927	up	--	--	GA3	2.74554	up	Gibberellin A3	C01699	ko00904,ko01110	0.810424	4.53958e-05	3
Cluster-116691.0	10.207	up	--	--	GA3	2.74554	up	Gibberellin A3	C01699	ko00904,ko01110	0.819458	3.16647e-05	3
Cluster-116691.6	11.4168	up	--	--	GA3	2.74554	up	Gibberellin A3	C01699	ko00904,ko01110	0.800805	6.52919e-05	3
Cluster-116722.6	9.04822	up	K17839	ko00330,ko00410,ko00770,ko01100	GA3	2.74554	up	Gibberellin A3	C01699	ko00904,ko01110	0.817087	3.48687e-05	3
Cluster-116835.2	8.55944	up	K08486	ko04130	GA3	2.74554	up	Gibberellin A3	C01699	ko00904,ko01110	0.817496	3.42972e-05	3
Cluster-116835.5	7.1032	up	K08486	ko04130	GA3	2.74554	up	Gibberellin A3	C01699	ko00904,ko01110	0.819821	3.11962e-05	3
Cluster-116905.1	8.73138	up	K01897	ko00061,ko00071,ko01100,ko01212,ko04146	GA3	2.74554	up	Gibberellin A3	C01699	ko00904,ko01110	0.837126	1.47374e-05	3
Cluster-116905.8	10.2671	up	K01897	ko00061,ko00071,ko01100,ko01212,ko04146	GA3	2.74554	up	Gibberellin A3	C01699	ko00904,ko01110	0.804924	5.60159e-05	3
Cluster-116912.2	7.66187	up	--	--	GA3	2.74554	up	Gibberellin A3	C01699	ko00904,ko01110	0.849555	8.13908e-06	3
Cluster-116959.0	2.2169	insig	--	--	GA3	2.74554	up	Gibberellin A3	C01699	ko00904,ko01110	0.852707	6.94286e-06	3
Cluster-116972.2	11.7496	up	K00264	ko00250,ko00910,ko01100,ko01110,ko01230	GA3	2.74554	up	Gibberellin A3	C01699	ko00904,ko01110	0.828107	2.20091e-05	3
Cluster-117034.0	11.7024	up	K13459	ko04626	GA3	2.74554	up	Gibberellin A3	C01699	ko00904,ko01110	0.858665	5.08888e-06	3
Cluster-117084.4	1.92011	up	--	--	GA3	2.74554	up	Gibberellin A3	C01699	ko00904,ko01110	0.804879	5.61106e-05	3
Cluster-117111.0	9.86793	up	K13429	ko04626	GA3	2.74554	up	Gibberellin A3	C01699	ko00904,ko01110	0.831928	1.86231e-05	3
Cluster-117153.3	5.47205	up	--	--	GA3	2.74554	up	Gibberellin A3	C01699	ko00904,ko01110	0.829817	2.04335e-05	3
Cluster-117153.5	3.81175	up	--	--	GA3	2.74554	up	Gibberellin A3	C01699	ko00904,ko01110	0.827319	2.2769e-05	3
Cluster-117162.1	1.57575	up	--	--	GA3	2.74554	up	Gibberellin A3	C01699	ko00904,ko01110	0.859243	4.93434e-06	3
Cluster-117281.4	3.68813	up	--	--	GA3	2.74554	up	Gibberellin A3	C01699	ko00904,ko01110	0.847412	9.0495e-06	3
Cluster-117293.0	7.58073	up	--	--	GA3	2.74554	up	Gibberellin A3	C01699	ko00904,ko01110	0.830582	1.97608e-05	3
Cluster-117335.0	4.43008	up	--	--	GA3	2.74554	up	Gibberellin A3	C01699	ko00904,ko01110	0.814001	3.94513e-05	3
Cluster-11740.101	6.78665	up	K13424	ko04016,ko04626	GA3	2.74554	up	Gibberellin A3	C01699	ko00904,ko01110	0.823836	2.64034e-05	3
Cluster-11740.103	9.75095	up	K13424	ko04016,ko04626	GA3	2.74554	up	Gibberellin A3	C01699	ko00904,ko01110	0.803916	5.81755e-05	3
Cluster-11740.3	7.83683	up	--	--	GA3	2.74554	up	Gibberellin A3	C01699	ko00904,ko01110	0.845367	9.99822e-06	3
Cluster-11740.61	7.5632	up	--	--	GA3	2.74554	up	Gibberellin A3	C01699	ko00904,ko01110	0.812981	4.10743e-05	3
Cluster-117465.2	4.35265	up	--	--	GA3	2.74554	up	Gibberellin A3	C01699	ko00904,ko01110	0.81814	3.34138e-05	3
Cluster-117581.2	2.46228	up	K00161	ko00010,ko00020,ko00620,ko01100,ko01110,ko01200	GA3	2.74554	up	Gibberellin A3	C01699	ko00904,ko01110	0.864572	3.68768e-06	3
Cluster-117592.2	6.50041	up	--	--	GA3	2.74554	up	Gibberellin A3	C01699	ko00904,ko01110	0.818273	3.32333e-05	3
Cluster-117592.3	11.0465	up	--	--	GA3	2.74554	up	Gibberellin A3	C01699	ko00904,ko01110	0.813392	4.04138e-05	3
Cluster-117592.5	4.01441	insig	--	--	GA3	2.74554	up	Gibberellin A3	C01699	ko00904,ko01110	0.824402	2.57817e-05	3
Cluster-117622.0	8.88859	up	--	--	GA3	2.74554	up	Gibberellin A3	C01699	ko00904,ko01110	0.802984	6.02349e-05	3
Cluster-117652.3	7.27441	up	K14157	ko00310,ko01100,ko01110	GA3	2.74554	up	Gibberellin A3	C01699	ko00904,ko01110	0.866773	3.25819e-06	3
Cluster-117718.4	1.41822	up	--	--	GA3	2.74554	up	Gibberellin A3	C01699	ko00904,ko01110	0.804933	5.59983e-05	3
Cluster-117775.10	8.26742	up	--	--	GA3	2.74554	up	Gibberellin A3	C01699	ko00904,ko01110	0.827293	2.27942e-05	3
Cluster-117775.6	11.5466	up	--	--	GA3	2.74554	up	Gibberellin A3	C01699	ko00904,ko01110	0.816612	3.55434e-05	3
Cluster-117788.2	7.87281	up	--	--	GA3	2.74554	up	Gibberellin A3	C01699	ko00904,ko01110	0.84607	9.66307e-06	3
Cluster-117788.4	6.57692	up	--	--	GA3	2.74554	up	Gibberellin A3	C01699	ko00904,ko01110	0.840716	1.24792e-05	3
Cluster-117838.3	7.51206	up	--	--	GA3	2.74554	up	Gibberellin A3	C01699	ko00904,ko01110	0.814412	3.88129e-05	3
Cluster-117838.5	2.25508	up	--	--	GA3	2.74554	up	Gibberellin A3	C01699	ko00904,ko01110	0.817315	3.45498e-05	3
Cluster-117985.2	2.16462	up	--	--	GA3	2.74554	up	Gibberellin A3	C01699	ko00904,ko01110	0.821694	2.88752e-05	3
Cluster-117992.1	9.35049	up	--	--	GA3	2.74554	up	Gibberellin A3	C01699	ko00904,ko01110	0.840925	1.23571e-05	3
Cluster-117992.2	10.6812	up	--	--	GA3	2.74554	up	Gibberellin A3	C01699	ko00904,ko01110	0.815818	3.66955e-05	3
Cluster-118100.3	9.70498	up	--	--	GA3	2.74554	up	Gibberellin A3	C01699	ko00904,ko01110	0.819481	3.16349e-05	3
Cluster-118129.1	7.27639	up	K00797	ko00270,ko00330,ko00480,ko01100	GA3	2.74554	up	Gibberellin A3	C01699	ko00904,ko01110	0.825807	2.4291e-05	3
Cluster-118197.4	14.9041	up	K00799	ko00480,ko01100	GA3	2.74554	up	Gibberellin A3	C01699	ko00904,ko01110	0.85482	6.22823e-06	3
Cluster-118268.14	9.16379	up	--	--	GA3	2.74554	up	Gibberellin A3	C01699	ko00904,ko01110	0.912956	1.25749e-07	3
Cluster-118301.5	5.45213	up	K03100	ko03060	GA3	2.74554	up	Gibberellin A3	C01699	ko00904,ko01110	0.820489	3.03513e-05	3
Cluster-118397.1	9.0127	up	--	--	GA3	2.74554	up	Gibberellin A3	C01699	ko00904,ko01110	0.818538	3.28769e-05	3
Cluster-118525.2	8.84604	up	K01648	ko00020,ko01100,ko01110	GA3	2.74554	up	Gibberellin A3	C01699	ko00904,ko01110	0.861612	4.34161e-06	3
Cluster-118536.1	10.3142	up	K14503	ko04075	GA3	2.74554	up	Gibberellin A3	C01699	ko00904,ko01110	0.869472	2.79081e-06	3
Cluster-118569.3	9.22809	up	--	--	GA3	2.74554	up	Gibberellin A3	C01699	ko00904,ko01110	0.824251	2.59463e-05	3
Cluster-118711.1	9.2902	up	K01803	ko00010,ko00051,ko00562,ko00710,ko01100,ko01110,ko01200,ko01230	GA3	2.74554	up	Gibberellin A3	C01699	ko00904,ko01110	0.842185	1.16441e-05	3
Cluster-118711.3	9.0582	up	K01803	ko00010,ko00051,ko00562,ko00710,ko01100,ko01110,ko01200,ko01230	GA3	2.74554	up	Gibberellin A3	C01699	ko00904,ko01110	0.831828	1.87053e-05	3
Cluster-118797.1	1.88127	up	K00793	ko00740,ko01100,ko01110,ko01240	GA3	2.74554	up	Gibberellin A3	C01699	ko00904,ko01110	0.839469	1.32275e-05	3
Cluster-118813.0	12.9552	up	K09842	ko00906,ko01100,ko01110	GA3	2.74554	up	Gibberellin A3	C01699	ko00904,ko01110	0.827455	2.2636e-05	3
Cluster-118813.1	8.61033	up	K09842	ko00906,ko01100,ko01110	GA3	2.74554	up	Gibberellin A3	C01699	ko00904,ko01110	0.835654	1.576e-05	3
Cluster-118852.2	9.922	up	--	--	GA3	2.74554	up	Gibberellin A3	C01699	ko00904,ko01110	0.859287	4.92271e-06	3
Cluster-118864.13	8.69721	up	--	--	GA3	2.74554	up	Gibberellin A3	C01699	ko00904,ko01110	0.81759	3.41676e-05	3
Cluster-118864.14	5.78196	up	--	--	GA3	2.74554	up	Gibberellin A3	C01699	ko00904,ko01110	0.807684	5.04484e-05	3
Cluster-118935.2	1.37352	up	K14488	ko04075	GA3	2.74554	up	Gibberellin A3	C01699	ko00904,ko01110	0.826565	2.35171e-05	3
Cluster-118943.2	5.90783	up	--	--	GA3	2.74554	up	Gibberellin A3	C01699	ko00904,ko01110	0.831863	1.86764e-05	3
Cluster-118949.3	7.19522	up	--	--	GA3	2.74554	up	Gibberellin A3	C01699	ko00904,ko01110	0.83172	1.87946e-05	3
Cluster-118988.1	8.62466	up	--	--	GA3	2.74554	up	Gibberellin A3	C01699	ko00904,ko01110	0.837706	1.43505e-05	3
Cluster-118988.2	3.48669	up	--	--	GA3	2.74554	up	Gibberellin A3	C01699	ko00904,ko01110	0.828582	2.15615e-05	3
Cluster-119028.4	7.38031	up	--	--	GA3	2.74554	up	Gibberellin A3	C01699	ko00904,ko01110	0.821499	2.91103e-05	3
Cluster-119136.4	7.31097	up	--	--	GA3	2.74554	up	Gibberellin A3	C01699	ko00904,ko01110	0.84506	1.01478e-05	3
Cluster-119198.1	8.5451	up	K04708	ko00600,ko01100	GA3	2.74554	up	Gibberellin A3	C01699	ko00904,ko01110	0.835915	1.55742e-05	3
[truncated: 37,664 more rows]

## Sheet: D-root_vs_X-root
Supplementary Table S7 DAPs and DEGs in quadrants 3 and 7 (3)
[truncated: 53,935 more rows]
