# Supplementary material for: An integrated targeted metabolome of phytohormones and transcriptomics analysis provides insight into the new generation of crops: Polygonatum kingianum var. grandifolium and Polygonatum kingianum
Source: Front Plant Sci. 2024 Sep 24;15:1464731. doi: 10.3389/fpls.2024.1464731 (PMC11458434; doi:10.3389/fpls.2024.1464731)
Supplement: Supplementary file 10 [file Table8.xlsx]

## Sheet: D-bud vs X-bud
Supplementary Table S8 Common KEGG pathways enriched by DEGs and DAPs in different groups (1)
KEGG_map	Description	DiffRatio_meta	BgRatio_meta	P-value_meta	Adjusted P-value_meta	Index_meta	CID_meta	Count_meta	DiffRatio_gene	BgRatio_gene	P-value_gene	Adjusted P-value_gene	Index_gene	KO_gene	Count_gene	Hyperlink
ko04075	Plant hormone signal transduction	3/14	7/20	0.992776	1	ABA;IAA;GA4	C06082+C00954+C11864	3	1283/25497	2910/60969	0.00587266	0.857408	Cluster-116277.0;Cluster-116277.2;Cluster-116277.6;Cluster-116277.7;Cluster-116277.8;Cluster-118316.0;Cluster-118376.0;Cluster-118376.5;Cluster-129208.5;Cluster-129208.6;Cluster-129208.7;Cluster-134381.3;Cluster-134381.8;Cluster-134591.0;Cluster-35277.14;Cluster-35277.15;Cluster-35277.16;Cluster-35277.17;Cluster-35277.18;Cluster-35277.20;Cluster-35277.21;Cluster-35277.23;Cluster-35786.10;Cluster-…	K12126+K12126+K12126+K12126+K12126+K12126+K12126+K12126+K12126+K12126+K12126+K12126+K12126+K12126+K12126+K12126+K12126+K12126+K12126+K12126+K12126+K12126+K12126+K12126+K12126+K12126+K12126+K12126+K12126+K12126+K12126+K12126+K12126+K12126+K12126+K12126+K12126+K12126+K12126+K12126+K12126+K12126+K12126+K12126+K12126+K12126+K12126+K12126+K12126+K12126+K12126+K12126+K12126+K13413+K13413+K13413+K13413+…	1283	https:\\www.genome.jp\dbget-bin\www_bget?map04075
ko00901	Indole alkaloid biosynthesis	2/14	2/20	0.478947	1	TRP;TRA	C00078+C00398	2	27/25497	55/60969	0.169142	1	Cluster-108327.1;Cluster-108327.2;Cluster-108327.3;Cluster-120404.1;Cluster-120404.5;Cluster-120404.7;Cluster-126142.0;Cluster-126142.2;Cluster-126142.3;Cluster-126142.4;Cluster-126142.5;Cluster-127946.0;Cluster-131592.0;Cluster-131592.1;Cluster-131592.5;Cluster-36391.2;Cluster-59874.6;Cluster-65621.3;Cluster-107064.0;Cluster-107064.1;Cluster-107064.3;Cluster-131062.0;Cluster-131062.2;Cluster-947…	K01593+K01593+K01593+K01593+K01593+K01593+K01593+K01593+K01593+K01593+K01593+K01593+K01593+K01593+K01593+K01593+K01593+K01593+K01757+K01757+K01757+K01757+K01757+K01757+K01757+K01757+K01757	27	https:\\www.genome.jp\dbget-bin\www_bget?map00901
ko00260	Glycine, serine and threonine metabolism	1/14	1/20	0.7	1	TRP	C00078	1	322/25497	759/60969	0.380352	1	Cluster-131823.10;Cluster-132785.1;Cluster-132785.10;Cluster-132785.2;Cluster-132785.4;Cluster-132785.6;Cluster-132785.8;Cluster-132785.9;Cluster-108117.0;Cluster-108117.1;Cluster-130508.0;Cluster-130508.1;Cluster-112214.0;Cluster-112214.2;Cluster-112214.4;Cluster-97759.0;Cluster-97759.1;Cluster-119201.0;Cluster-119201.1;Cluster-130452.6;Cluster-105362.0;Cluster-105362.1;Cluster-105362.2;Cluster-…	K00058+K00058+K00058+K00058+K00058+K00058+K00058+K00058+K00108+K00108+K00108+K00108+K00130+K00130+K00130+K00130+K00130+K00133+K00133+K00133+K00276+K00276+K00276+K00276+K00276+K00276+K00276+K00276+K00276+K00276+K00276+K00276+K00276+K00276+K00276+K00276+K00276+K00276+K00276+K00276+K00276+K00281+K00281+K00281+K00281+K00281+K00306+K00306+K00306+K00306+K00306+K00306+K00382+K00382+K00382+K00382+K00382+…	322	https:\\www.genome.jp\dbget-bin\www_bget?map00260
ko00966	Glucosinolate biosynthesis	1/14	1/20	0.7	1	TRP	C00078	1	13/25497	29/60969	0.440389	1	Cluster-113811.0;Cluster-113811.1;Cluster-113811.2;Cluster-113811.3;Cluster-93264.4;Cluster-93264.5;Cluster-129929.0;Cluster-129929.1;Cluster-129929.3;Cluster-129929.4;Cluster-129929.5;Cluster-129929.6;Cluster-129929.7	K00826+K00826+K00826+K00826+K00826+K00826+K01703+K01703+K01703+K01703+K01703+K01703+K01703	13	https:\\www.genome.jp\dbget-bin\www_bget?map00966
ko00906	Carotenoid biosynthesis	1/14	1/20	0.7	1	ABA	C06082	1	132/25497	315/60969	0.509352	1	Cluster-100373.0;Cluster-120938.3;Cluster-120938.4;Cluster-120938.7;Cluster-120938.9;Cluster-13792.2;Cluster-35314.7;Cluster-49019.1;Cluster-52476.4;Cluster-67887.13;Cluster-98753.1;Cluster-98753.2;Cluster-98753.4;Cluster-98753.7;Cluster-120298.0;Cluster-120298.1;Cluster-120298.3;Cluster-120298.4;Cluster-120298.5;Cluster-85115.0;Cluster-63157.0;Cluster-128170.1;Cluster-128170.2;Cluster-128170.3;C…	K02291+K02291+K02291+K02291+K02291+K02291+K02291+K02291+K02291+K02291+K02291+K02291+K02291+K02291+K02293+K02293+K02293+K02293+K02293+K02293+K06443+K06444+K06444+K06444+K06444+K06444+K06444+K06444+K06444+K06444+K09835+K09835+K09835+K09835+K09835+K09835+K09835+K09835+K09837+K09837+K09837+K09837+K09837+K09838+K09838+K09838+K09838+K09838+K09838+K09838+K09838+K09838+K09838+K09838+K09838+K09838+K09838+…	132	https:\\www.genome.jp\dbget-bin\www_bget?map00906
ko00996	Biosynthesis of various alkaloids	1/14	2/20	0.921053	1	TRP	C00078	1	8/25497	19/60969	0.576883	1	Cluster-59025.0;Cluster-114203.0;Cluster-116900.0;Cluster-29799.12;Cluster-29799.15;Cluster-29799.23;Cluster-29799.10;Cluster-29799.20	K25060+K25489+K25489+K25489+K25489+K25489+K25490+K25490	8	https:\\www.genome.jp\dbget-bin\www_bget?map00996
ko01210	2-Oxocarboxylic acid metabolism	1/14	1/20	0.7	1	TRP	C00078	1	228/25497	551/60969	0.599345	1	Cluster-100196.0;Cluster-104585.5;Cluster-104585.7;Cluster-119425.0;Cluster-119425.2;Cluster-119769.2;Cluster-119769.3;Cluster-119769.5;Cluster-21005.0;Cluster-21005.10;Cluster-21005.13;Cluster-21005.14;Cluster-21005.15;Cluster-21005.5;Cluster-21005.6;Cluster-21005.7;Cluster-33051.53;Cluster-58473.10;Cluster-58473.7;Cluster-70978.2;Cluster-98788.0;Cluster-123035.0;Cluster-123035.1;Cluster-123035.…	K00030+K00030+K00030+K00030+K00030+K00030+K00030+K00030+K00030+K00030+K00030+K00030+K00030+K00030+K00030+K00030+K00030+K00030+K00030+K00030+K00030+K00031+K00031+K00031+K00031+K00031+K00031+K00031+K00031+K00031+K00031+K00031+K00031+K00031+K00031+K00031+K00031+K00031+K00031+K00031+K00031+K00031+K00031+K00031+K00031+K00031+K00031+K00031+K00052+K00052+K00052+K00052+K00052+K00052+K00052+K00052+K00053+…	228	https:\\www.genome.jp\dbget-bin\www_bget?map01210
ko00380	Tryptophan metabolism	4/14	4/20	0.206605	1	TRP;TRA;IAM;IAA	C00078+C00398+C02693+C00954	4	298/25497	729/60969	0.710521	1	Cluster-113514.0;Cluster-113514.1;Cluster-113514.2;Cluster-129794.0;Cluster-129794.11;Cluster-129794.12;Cluster-129794.13;Cluster-129794.14;Cluster-129794.16;Cluster-129794.17;Cluster-129794.19;Cluster-129794.2;Cluster-129794.3;Cluster-129794.4;Cluster-129794.8;Cluster-129794.9;Cluster-133601.0;Cluster-133601.1;Cluster-133601.2;Cluster-133601.4;Cluster-133601.6;Cluster-133601.7;Cluster-134234.0;C…	K00128+K00128+K00128+K00128+K00128+K00128+K00128+K00128+K00128+K00128+K00128+K00128+K00128+K00128+K00128+K00128+K00128+K00128+K00128+K00128+K00128+K00128+K00128+K00128+K00128+K00128+K00128+K00128+K00128+K00128+K00128+K00128+K00128+K00128+K00128+K00128+K00128+K00128+K00128+K00128+K00128+K00128+K00128+K00128+K00128+K00128+K00128+K00128+K00128+K00128+K00128+K00128+K00128+K00128+K00128+K00382+K00382+…	298	https:\\www.genome.jp\dbget-bin\www_bget?map00380
ko00908	Zeatin biosynthesis	4/14	5/20	0.516512	1	cZR;tZOG;tZR;IPR	C16449+C03423+C16431+C04432	4	80/25497	204/60969	0.795318	1	Cluster-112468.2;Cluster-115173.3;Cluster-115173.6;Cluster-120547.0;Cluster-120547.1;Cluster-120547.3;Cluster-131931.2;Cluster-131931.5;Cluster-131931.6;Cluster-68882.380;Cluster-84440.0;Cluster-98370.0;Cluster-98370.1;Cluster-98370.3;Cluster-98370.4;Cluster-114727.0;Cluster-114727.1;Cluster-114727.3;Cluster-93324.0;Cluster-92822.1;Cluster-122276.0;Cluster-103971.1;Cluster-103971.2;Cluster-103971…	K00279+K00279+K00279+K00279+K00279+K00279+K00279+K00279+K00279+K00279+K00279+K00279+K00279+K00279+K00279+K00791+K00791+K00791+K00791+K10717+K10760+K13495+K13495+K13495+K13495+K13495+K13496+K13496+K13496+K13496+K13496+K13496+K13496+K13496+K13496+K13496+K13496+K13496+K13496+K13496+K13496+K13496+K13496+K13496+K13496+K23452+K23452+K23452+K23452+K23452+K23452+K23452+K23452+K23452+K23452+K23452+K23452+…	80	https:\\www.genome.jp\dbget-bin\www_bget?map00908
ko01240	Biosynthesis of cofactors	1/14	1/20	0.7	1	TRP	C00078	1	1124/25497	2744/60969	0.829344	1	Cluster-109215.1;Cluster-109215.2;Cluster-111450.1;Cluster-111450.3;Cluster-124097.0;Cluster-124097.1;Cluster-124097.7;Cluster-124338.1;Cluster-50528.41;Cluster-50528.48;Cluster-50528.49;Cluster-50528.50;Cluster-50528.71;Cluster-50528.76;Cluster-50528.79;Cluster-50528.84;Cluster-93999.0;Cluster-125423.1;Cluster-126848.0;Cluster-126848.1;Cluster-126848.2;Cluster-126848.3;Cluster-126848.6;Cluster-9…	K00002+K00002+K00002+K00002+K00002+K00002+K00002+K00002+K00002+K00002+K00002+K00002+K00002+K00002+K00002+K00002+K00002+K00012+K00012+K00012+K00012+K00012+K00012+K00012+K00059+K00059+K00059+K00059+K00059+K00059+K00059+K00059+K00059+K00059+K00059+K00059+K00059+K00059+K00059+K00059+K00059+K00059+K00059+K00059+K00059+K00059+K00059+K00059+K00059+K00059+K00059+K00059+K00103+K00103+K00128+K00128+K00128+…	1124	https:\\www.genome.jp\dbget-bin\www_bget?map01240
ko00970	Aminoacyl-tRNA biosynthesis	1/14	1/20	0.7	1	TRP	C00078	1	411/25497	1039/60969	0.936402	1	Cluster-103654.1;Cluster-103654.2;Cluster-103654.3;Cluster-103654.6;Cluster-123518.2;Cluster-123518.3;Cluster-123518.6;Cluster-123518.8;Cluster-125839.2;Cluster-125839.4;Cluster-128141.0;Cluster-128141.1;Cluster-128141.11;Cluster-128141.2;Cluster-128141.3;Cluster-128141.5;Cluster-128141.6;Cluster-107872.0;Cluster-107872.1;Cluster-107872.2;Cluster-107872.3;Cluster-107872.4;Cluster-115818.1;Cluster…	K00604+K00604+K00604+K00604+K01866+K01866+K01866+K01866+K01866+K01866+K01866+K01866+K01866+K01866+K01866+K01866+K01866+K01867+K01867+K01867+K01867+K01867+K01867+K01867+K01867+K01867+K01867+K01867+K01867+K01867+K01867+K01867+K01867+K01867+K01867+K01867+K01867+K01867+K01867+K01867+K01867+K01867+K01867+K01868+K01868+K01868+K01868+K01868+K01868+K01868+K01868+K01868+K01868+K01868+K01868+K01868+K01868+…	411	https:\\www.genome.jp\dbget-bin\www_bget?map00970
ko01230	Biosynthesis of amino acids	1/14	1/20	0.7	1	TRP	C00078	1	1144/25497	2845/60969	0.964336	1	Cluster-134292.0;Cluster-134292.3;Cluster-134292.5;Cluster-19474.0;Cluster-100196.0;Cluster-104585.5;Cluster-104585.7;Cluster-119425.0;Cluster-119425.2;Cluster-119769.2;Cluster-119769.3;Cluster-119769.5;Cluster-21005.0;Cluster-21005.10;Cluster-21005.13;Cluster-21005.14;Cluster-21005.15;Cluster-21005.5;Cluster-21005.6;Cluster-21005.7;Cluster-33051.53;Cluster-58473.10;Cluster-58473.7;Cluster-70978.…	K00013+K00013+K00013+K00013+K00030+K00030+K00030+K00030+K00030+K00030+K00030+K00030+K00030+K00030+K00030+K00030+K00030+K00030+K00030+K00030+K00030+K00030+K00030+K00030+K00030+K00031+K00031+K00031+K00031+K00031+K00031+K00031+K00031+K00031+K00031+K00031+K00031+K00031+K00031+K00031+K00031+K00031+K00031+K00031+K00031+K00031+K00031+K00031+K00031+K00031+K00031+K00031+K00052+K00052+K00052+K00052+K00052+…	1144	https:\\www.genome.jp\dbget-bin\www_bget?map01230
ko00904	Diterpenoid biosynthesis	5/14	7/20	0.664087	1	GA20;GA4;GA7;GA24;GA9	C02035+C11864+C11867+C11861+C11863	5	73/25497	208/60969	0.980044	1	Cluster-127400.0;Cluster-51816.3;Cluster-51816.5;Cluster-51816.7;Cluster-94234.3;Cluster-94234.4;Cluster-94234.6;Cluster-110747.0;Cluster-116702.1;Cluster-116702.2;Cluster-116702.4;Cluster-29980.0;Cluster-29980.3;Cluster-28268.0;Cluster-43519.11;Cluster-43519.12;Cluster-43519.2;Cluster-43519.5;Cluster-43519.6;Cluster-43519.7;Cluster-43519.9;Cluster-59257.191;Cluster-112642.0;Cluster-121932.1;Clus…	K04120+K04120+K04120+K04120+K04120+K04120+K04120+K04121+K04121+K04121+K04121+K04121+K04121+K04122+K04122+K04122+K04122+K04122+K04122+K04122+K04122+K04122+K04123+K04123+K04123+K04123+K04123+K04124+K04124+K04124+K04124+K04124+K04125+K04125+K04125+K04125+K04125+K04125+K04125+K04125+K04125+K04125+K04125+K04125+K04125+K04125+K04125+K04125+K04125+K04125+K05282+K05282+K05282+K13070+K13070+K13070+K13070+…	73	https:\\www.genome.jp\dbget-bin\www_bget?map00904
ko01110	Biosynthesis of secondary metabolites	12/14	17/20	0.680702	1	ABA;TRP;TRA;cZR;tZOG;tZR;IPR;GA20;GA4;GA7;GA24;GA9	C06082+C00078+C00398+C16449+C03423+C16431+C04432+C02035+C11864+C11867+C11861+C11863	12	5575/25497	13818/60969	0.999969	1	Cluster-115056.0;Cluster-39014.1;Cluster-7363.42;Cluster-7363.46;Cluster-7363.48;Cluster-7363.49;Cluster-7363.54;Cluster-7363.56;Cluster-109215.1;Cluster-109215.2;Cluster-111450.1;Cluster-111450.3;Cluster-124097.0;Cluster-124097.1;Cluster-124097.7;Cluster-124338.1;Cluster-50528.41;Cluster-50528.48;Cluster-50528.49;Cluster-50528.50;Cluster-50528.71;Cluster-50528.76;Cluster-50528.79;Cluster-50528.8…	K00001+K00001+K00001+K00001+K00001+K00001+K00001+K00001+K00002+K00002+K00002+K00002+K00002+K00002+K00002+K00002+K00002+K00002+K00002+K00002+K00002+K00002+K00002+K00002+K00002+K00006+K00006+K00006+K00006+K00006+K00006+K00006+K00006+K00006+K00006+K00006+K00013+K00013+K00013+K00013+K00016+K00016+K00021+K00021+K00021+K00021+K00021+K00021+K00021+K00021+K00021+K00021+K00021+K00021+K00021+K00021+K00021+…	5575	https:\\www.genome.jp\dbget-bin\www_bget?map01110
ko00400	Phenylalanine, tyrosine and tryptophan biosynthesis	1/14	1/20	0.7	1	TRP	C00078	1	181/25497	545/60969	0.999986	1	Cluster-125036.1;Cluster-125036.2;Cluster-125036.3;Cluster-125036.4;Cluster-125121.2;Cluster-40822.1;Cluster-40822.4;Cluster-40822.5;Cluster-114208.1;Cluster-114208.2;Cluster-114208.3;Cluster-114208.4;Cluster-114208.5;Cluster-114208.6;Cluster-114208.7;Cluster-112077.3;Cluster-112077.5;Cluster-112077.6;Cluster-101214.1;Cluster-112843.0;Cluster-112843.2;Cluster-112843.3;Cluster-112843.4;Cluster-112…	K00766+K00766+K00766+K00766+K00766+K00766+K00766+K00766+K00800+K00800+K00800+K00800+K00800+K00800+K00800+K00811+K00811+K00811+K00815+K00815+K00815+K00815+K00815+K00815+K00815+K00815+K00815+K00815+K00815+K00815+K00815+K00815+K00815+K00815+K00815+K00815+K00815+K00815+K00817+K00817+K00817+K00817+K00891+K00891+K00891+K00891+K00891+K00891+K01609+K01609+K01609+K01609+K01609+K01609+K01626+K01626+K01626+…	181	https:\\www.genome.jp\dbget-bin\www_bget?map00400
ko01100	Metabolic pathways	10/14	14/20	0.612616	1	ABA;TRP;TRA;IAM;IAA;IPR;GA20;GA4;GA24;GA9	C06082+C00078+C00398+C02693+C00954+C04432+C02035+C11864+C11861+C11863	10	10516/25497	25974/60969	1	1	Cluster-115056.0;Cluster-39014.1;Cluster-7363.42;Cluster-7363.46;Cluster-7363.48;Cluster-7363.49;Cluster-7363.54;Cluster-7363.56;Cluster-109215.1;Cluster-109215.2;Cluster-111450.1;Cluster-111450.3;Cluster-124097.0;Cluster-124097.1;Cluster-124097.7;Cluster-124338.1;Cluster-50528.41;Cluster-50528.48;Cluster-50528.49;Cluster-50528.50;Cluster-50528.71;Cluster-50528.76;Cluster-50528.79;Cluster-50528.8…	K00001+K00001+K00001+K00001+K00001+K00001+K00001+K00001+K00002+K00002+K00002+K00002+K00002+K00002+K00002+K00002+K00002+K00002+K00002+K00002+K00002+K00002+K00002+K00002+K00002+K00008+K00008+K00008+K00008+K00008+K00008+K00008+K00008+K00012+K00012+K00012+K00012+K00012+K00012+K00012+K00013+K00013+K00013+K00013+K00016+K00016+K00020+K00020+K00020+K00020+K00020+K00020+K00020+K00020+K00020+K00020+K00020+…	10516	https:\\www.genome.jp\dbget-bin\www_bget?map01100

## Sheet: D-rhizome vs X-rhizome
Supplementary Table S8 Common KEGG pathways enriched by DEGs and DAPs in different groups (2)
KEGG_map	Description	DiffRatio_meta	BgRatio_meta	P-value_meta	Adjusted P-value_meta	Index_meta	CID_meta	Count_meta	DiffRatio_gene	BgRatio_gene	P-value_gene	Adjusted P-value_gene	Index_gene	KO_gene	Count_gene	Hyperlink
ko00592	alpha-Linolenic acid metabolism	1/10	1/17	0.588235	1	JA	C08491	1	229/24220	541/60969	0.115472	1	Cluster-127575.0;Cluster-127575.2;Cluster-127575.5;Cluster-127575.7;Cluster-89347.0;Cluster-89347.2;Cluster-89347.4;Cluster-89347.5;Cluster-89347.7;Cluster-117284.0;Cluster-117284.1;Cluster-117284.4;Cluster-120522.0;Cluster-120522.1;Cluster-120522.4;Cluster-120522.5;Cluster-120522.7;Cluster-120522.8;Cluster-127187.1;Cluster-127187.3;Cluster-127187.4;Cluster-127187.5;Cluster-127600.2;Cluster-12832…	K00224+K00224+K00224+K00224+K00224+K00224+K00224+K00224+K00224+K00232+K00232+K00232+K00232+K00232+K00232+K00232+K00232+K00232+K00232+K00232+K00232+K00232+K00232+K00232+K00232+K00232+K00232+K00232+K00454+K00454+K00454+K00454+K00454+K00454+K00454+K00454+K00454+K00454+K00454+K00454+K00454+K00454+K00454+K00454+K00454+K00454+K00454+K01047+K01047+K01047+K01047+K01047+K01723+K01723+K01723+K01723+K01723+…	229	https:\\www.genome.jp\dbget-bin\www_bget?map00592
ko04075	Plant hormone signal transduction	5/10	7/17	0.353867	1	DZ;tZ;JA;JA-ILE;SA	C02029+C00371+C08491+C18699+C00805	5	1170/24220	2910/60969	0.299816	1	Cluster-116277.0;Cluster-116277.1;Cluster-116277.2;Cluster-116277.5;Cluster-116277.6;Cluster-116277.8;Cluster-118376.0;Cluster-118376.2;Cluster-118376.4;Cluster-129208.0;Cluster-129208.3;Cluster-129208.6;Cluster-129208.7;Cluster-134381.3;Cluster-35277.14;Cluster-35277.15;Cluster-35277.16;Cluster-35277.18;Cluster-35277.20;Cluster-35277.21;Cluster-35277.22;Cluster-35277.23;Cluster-35786.10;Cluster-…	K12126+K12126+K12126+K12126+K12126+K12126+K12126+K12126+K12126+K12126+K12126+K12126+K12126+K12126+K12126+K12126+K12126+K12126+K12126+K12126+K12126+K12126+K12126+K12126+K12126+K12126+K12126+K12126+K12126+K12126+K12126+K12126+K12126+K12126+K12126+K12126+K12126+K12126+K12126+K12126+K12126+K12126+K13413+K13413+K13413+K13413+K13413+K13413+K13413+K13413+K13413+K13413+K13413+K13413+K13413+K13413+K13413+…	1170	https:\\www.genome.jp\dbget-bin\www_bget?map04075
ko00380	Tryptophan metabolism	1/10	4/17	0.985294	1	IAM	C02693	1	284/24220	729/60969	0.678012	1	Cluster-107475.0;Cluster-113514.0;Cluster-113514.1;Cluster-113514.2;Cluster-126911.0;Cluster-129794.0;Cluster-129794.10;Cluster-129794.12;Cluster-129794.13;Cluster-129794.14;Cluster-129794.15;Cluster-129794.16;Cluster-129794.17;Cluster-129794.19;Cluster-129794.3;Cluster-129794.5;Cluster-133601.0;Cluster-133601.2;Cluster-133601.7;Cluster-134234.0;Cluster-134234.1;Cluster-134234.2;Cluster-134234.3;…	K00128+K00128+K00128+K00128+K00128+K00128+K00128+K00128+K00128+K00128+K00128+K00128+K00128+K00128+K00128+K00128+K00128+K00128+K00128+K00128+K00128+K00128+K00128+K00128+K00128+K00128+K00128+K00128+K00128+K00128+K00128+K00128+K00128+K00128+K00128+K00128+K00128+K00128+K00128+K00128+K00128+K00128+K00128+K00128+K00128+K00128+K00382+K00382+K00382+K00382+K00382+K00382+K00382+K00382+K00382+K00382+K00382+…	284	https:\\www.genome.jp\dbget-bin\www_bget?map00380
ko00996	Biosynthesis of various alkaloids	1/10	2/17	0.845588	1	SA	C00805	1	7/24220	19/60969	0.683257	1	Cluster-59025.0;Cluster-59025.1;Cluster-29799.12;Cluster-29799.14;Cluster-29799.23;Cluster-29799.20;Cluster-112924.0	K25060+K25060+K25489+K25489+K25489+K25490+K25492	7	https:\\www.genome.jp\dbget-bin\www_bget?map00996
ko00904	Diterpenoid biosynthesis	3/10	4/17	0.441176	1	GA3;GA24;GA9	C01699+C11861+C11863	3	64/24220	208/60969	0.997062	1	Cluster-127400.0;Cluster-51816.2;Cluster-51816.3;Cluster-51816.7;Cluster-94234.2;Cluster-94234.3;Cluster-110747.0;Cluster-116702.1;Cluster-116702.2;Cluster-116702.3;Cluster-29980.0;Cluster-29980.3;Cluster-28268.0;Cluster-43519.11;Cluster-43519.2;Cluster-43519.5;Cluster-43519.6;Cluster-43519.7;Cluster-43519.9;Cluster-121932.2;Cluster-121932.3;Cluster-121932.4;Cluster-112924.1;Cluster-130427.0;Clus…	K04120+K04120+K04120+K04120+K04120+K04120+K04121+K04121+K04121+K04121+K04121+K04121+K04122+K04122+K04122+K04122+K04122+K04122+K04122+K04123+K04123+K04123+K04124+K04124+K04124+K04124+K04124+K04124+K04124+K04125+K04125+K04125+K04125+K04125+K04125+K04125+K04125+K04125+K04125+K04125+K04125+K05282+K05282+K05282+K05282+K05282+K13070+K13070+K13070+K13070+K13070+K13070+K13070+K13070+K13070+K16085+K17982+…	64	https:\\www.genome.jp\dbget-bin\www_bget?map00904
ko00908	Zeatin biosynthesis	3/10	5/17	0.68552	1	DZ;IPR;tZ	C02029+C04432+C00371	3	61/24220	204/60969	0.998618	1	Cluster-115173.3;Cluster-120547.1;Cluster-120547.3;Cluster-131931.2;Cluster-68882.459;Cluster-68882.463;Cluster-73984.0;Cluster-80589.0;Cluster-98370.0;Cluster-98370.3;Cluster-114727.1;Cluster-11943.0;Cluster-103971.2;Cluster-133348.1;Cluster-133348.4;Cluster-110470.0;Cluster-110470.1;Cluster-110888.0;Cluster-110888.2;Cluster-110888.3;Cluster-110888.4;Cluster-121822.1;Cluster-121822.2;Cluster-121…	K00279+K00279+K00279+K00279+K00279+K00279+K00279+K00279+K00279+K00279+K00791+K10760+K13495+K13495+K13495+K13496+K13496+K13496+K13496+K13496+K13496+K13496+K13496+K13496+K13496+K13496+K13496+K13496+K13496+K13496+K13496+K23452+K23452+K23452+K23452+K23452+K23452+K23452+K23452+K23452+K23452+K23452+K23452+K23452+K23452+K23452+K23452+K23452+K23452+K23452+K23452+K23452+K23452+K23452+K23452+K23452+K23452+…	61	https:\\www.genome.jp\dbget-bin\www_bget?map00908
ko01110	Biosynthesis of secondary metabolites	8/10	14/17	0.823529	1	DZ;IPR;tZ;GA3;GA24;GA9;JA;SA	C02029+C04432+C00371+C01699+C11861+C11863+C08491+C00805	8	5193/24220	13818/60969	1	1	Cluster-115056.0;Cluster-39014.1;Cluster-7363.54;Cluster-7363.56;Cluster-109215.1;Cluster-111450.1;Cluster-111450.3;Cluster-124097.0;Cluster-124097.1;Cluster-124097.7;Cluster-124338.0;Cluster-130100.1;Cluster-50528.41;Cluster-50528.47;Cluster-50528.71;Cluster-50528.76;Cluster-93999.0;Cluster-104449.7;Cluster-104449.8;Cluster-104449.9;Cluster-111445.0;Cluster-115697.0;Cluster-115697.2;Cluster-1156…	K00001+K00001+K00001+K00001+K00002+K00002+K00002+K00002+K00002+K00002+K00002+K00002+K00002+K00002+K00002+K00002+K00002+K00006+K00006+K00006+K00006+K00006+K00006+K00006+K00006+K00006+K00013+K00013+K00013+K00016+K00016+K00021+K00021+K00021+K00021+K00021+K00021+K00021+K00021+K00021+K00021+K00021+K00021+K00021+K00021+K00021+K00021+K00021+K00021+K00021+K00021+K00021+K00021+K00021+K00021+K00025+K00025+…	5193	https:\\www.genome.jp\dbget-bin\www_bget?map01110
ko01100	Metabolic pathways	7/10	12/17	0.721719	1	IAM;IPR;tZ;GA24;GA9;JA;SA	C02693+C04432+C00371+C11861+C11863+C08491+C00805	7	9809/24220	25974/60969	1	1	Cluster-115056.0;Cluster-39014.1;Cluster-7363.54;Cluster-7363.56;Cluster-109215.1;Cluster-111450.1;Cluster-111450.3;Cluster-124097.0;Cluster-124097.1;Cluster-124097.7;Cluster-124338.0;Cluster-130100.1;Cluster-50528.41;Cluster-50528.47;Cluster-50528.71;Cluster-50528.76;Cluster-93999.0;Cluster-68188.26;Cluster-68188.27;Cluster-68188.28;Cluster-68188.32;Cluster-68188.33;Cluster-68188.35;Cluster-6818…	K00001+K00001+K00001+K00001+K00002+K00002+K00002+K00002+K00002+K00002+K00002+K00002+K00002+K00002+K00002+K00002+K00002+K00008+K00008+K00008+K00008+K00008+K00008+K00008+K00008+K00012+K00012+K00012+K00012+K00012+K00012+K00013+K00013+K00013+K00016+K00016+K00020+K00020+K00020+K00020+K00020+K00020+K00020+K00020+K00020+K00020+K00020+K00020+K00020+K00020+K00020+K00020+K00020+K00020+K00020+K00020+K00020+…	9809	https:\\www.genome.jp\dbget-bin\www_bget?map01100

## Sheet: D-root vs X-root
Supplementary Table S8 Common KEGG pathways enriched by DEGs and DAPs in different groups (3)
KEGG_map	Description	DiffRatio_meta	BgRatio_meta	P-value_meta	Adjusted P-value_meta	Index_meta	CID_meta	Count_meta	DiffRatio_gene	BgRatio_gene	P-value_gene	Adjusted P-value_gene	Index_gene	KO_gene	Count_gene	Hyperlink
ko00901	Indole alkaloid biosynthesis	1/10	2/19	0.789474	1	TRA	C00398	1	31/26245	55/60969	0.0320953	1	Cluster-108327.0;Cluster-108327.1;Cluster-108327.2;Cluster-108327.3;Cluster-120404.1;Cluster-120404.5;Cluster-120404.7;Cluster-126142.0;Cluster-126142.2;Cluster-126142.4;Cluster-127946.0;Cluster-131592.0;Cluster-131592.5;Cluster-45175.0;Cluster-59874.0;Cluster-59874.1;Cluster-59874.3;Cluster-59874.4;Cluster-59874.6;Cluster-59874.8;Cluster-65621.3;Cluster-107064.0;Cluster-107064.1;Cluster-107064.3…	K01593+K01593+K01593+K01593+K01593+K01593+K01593+K01593+K01593+K01593+K01593+K01593+K01593+K01593+K01593+K01593+K01593+K01593+K01593+K01593+K01593+K01757+K01757+K01757+K01757+K01757+K01757+K01757+K01757+K01757+K01757	31	https:\\www.genome.jp\dbget-bin\www_bget?map00901
ko00906	Carotenoid biosynthesis	1/10	2/19	0.789474	1	ST	C09190	1	148/26245	315/60969	0.087521	1	Cluster-120938.3;Cluster-120938.4;Cluster-120938.7;Cluster-120938.9;Cluster-49019.1;Cluster-4944.0;Cluster-52476.2;Cluster-52476.3;Cluster-52476.4;Cluster-67887.13;Cluster-7146.0;Cluster-98753.2;Cluster-98753.4;Cluster-120298.0;Cluster-120298.1;Cluster-120298.3;Cluster-120298.4;Cluster-120298.5;Cluster-63157.0;Cluster-128170.1;Cluster-128170.2;Cluster-128170.3;Cluster-128170.8;Cluster-133345.0;Cl…	K02291+K02291+K02291+K02291+K02291+K02291+K02291+K02291+K02291+K02291+K02291+K02291+K02291+K02293+K02293+K02293+K02293+K02293+K06443+K06444+K06444+K06444+K06444+K06444+K06444+K06444+K06444+K09835+K09835+K09835+K09835+K09835+K09835+K09835+K09835+K09837+K09837+K09837+K09838+K09838+K09838+K09838+K09838+K09838+K09838+K09838+K09838+K09838+K09838+K09838+K09838+K09838+K09838+K09838+K09838+K09838+K09838+…	148	https:\\www.genome.jp\dbget-bin\www_bget?map00906
ko00904	Diterpenoid biosynthesis	3/10	4/19	0.332817	1	GA20;GA7;GA3	C02035+C11867+C01699	3	99/26245	208/60969	0.104598	1	Cluster-127400.0;Cluster-51816.2;Cluster-51816.3;Cluster-51816.7;Cluster-83741.2;Cluster-94234.2;Cluster-94234.3;Cluster-116702.1;Cluster-116702.2;Cluster-116702.3;Cluster-116702.4;Cluster-29980.0;Cluster-29980.3;Cluster-123164.0;Cluster-28268.0;Cluster-43519.11;Cluster-43519.12;Cluster-43519.13;Cluster-43519.2;Cluster-43519.5;Cluster-43519.6;Cluster-43519.7;Cluster-43519.8;Cluster-43519.9;Cluste…	K04120+K04120+K04120+K04120+K04120+K04120+K04120+K04121+K04121+K04121+K04121+K04121+K04121+K04122+K04122+K04122+K04122+K04122+K04122+K04122+K04122+K04122+K04122+K04122+K04123+K04123+K04123+K04123+K04123+K04123+K04124+K04124+K04124+K04124+K04124+K04124+K04124+K04124+K04124+K04124+K04125+K04125+K04125+K04125+K04125+K04125+K04125+K04125+K04125+K04125+K04125+K04125+K04125+K04125+K04125+K04125+K04125+…	99	https:\\www.genome.jp\dbget-bin\www_bget?map00904
ko00908	Zeatin biosynthesis	3/10	6/19	0.741486	1	cZ;DZ;tZ	C15545+C02029+C00371	3	97/26245	204/60969	0.109578	1	Cluster-112468.0;Cluster-112468.1;Cluster-112468.2;Cluster-120547.3;Cluster-131931.2;Cluster-131931.4;Cluster-131931.5;Cluster-131931.6;Cluster-131931.7;Cluster-131931.8;Cluster-68882.380;Cluster-73984.0;Cluster-80589.0;Cluster-98370.0;Cluster-98370.1;Cluster-98370.2;Cluster-98370.3;Cluster-98370.4;Cluster-110298.0;Cluster-114727.0;Cluster-132795.0;Cluster-132795.1;Cluster-40947.0;Cluster-46437.0…	K00279+K00279+K00279+K00279+K00279+K00279+K00279+K00279+K00279+K00279+K00279+K00279+K00279+K00279+K00279+K00279+K00279+K00279+K00791+K00791+K10717+K10717+K10717+K10717+K10717+K10717+K10717+K10760+K13495+K13495+K13495+K13495+K13495+K13495+K13495+K13496+K13496+K13496+K13496+K13496+K13496+K13496+K13496+K13496+K13496+K13496+K13496+K13496+K13496+K13496+K13496+K13496+K13496+K13496+K13496+K13496+K13496+…	97	https:\\www.genome.jp\dbget-bin\www_bget?map00908
ko04075	Plant hormone signal transduction	3/10	7/19	0.870088	1	DZ;tZ;JA-ILE	C02029+C00371+C18699	3	1282/26245	2910/60969	0.134234	1	Cluster-116277.0;Cluster-116277.2;Cluster-116277.6;Cluster-116277.8;Cluster-118376.0;Cluster-118376.2;Cluster-118376.4;Cluster-118376.6;Cluster-129208.0;Cluster-129208.6;Cluster-129208.7;Cluster-134381.3;Cluster-134381.8;Cluster-35277.12;Cluster-35277.14;Cluster-35277.15;Cluster-35277.16;Cluster-35277.17;Cluster-35277.18;Cluster-35277.20;Cluster-35277.21;Cluster-35277.23;Cluster-35786.10;Cluster-…	K12126+K12126+K12126+K12126+K12126+K12126+K12126+K12126+K12126+K12126+K12126+K12126+K12126+K12126+K12126+K12126+K12126+K12126+K12126+K12126+K12126+K12126+K12126+K12126+K12126+K12126+K12126+K12126+K12126+K12126+K12126+K12126+K12126+K12126+K12126+K12126+K12126+K12126+K12126+K12126+K12126+K12126+K13413+K13413+K13413+K13413+K13413+K13413+K13413+K13413+K13413+K13413+K13413+K13413+K13413+K13413+K13413+…	1282	https:\\www.genome.jp\dbget-bin\www_bget?map04075
ko01110	Biosynthesis of secondary metabolites	8/10	16/19	0.876161	1	TRA;cZ;DZ;tZ;GA20;GA7;GA3;ST	C00398+C15545+C02029+C00371+C02035+C11867+C01699+C09190	8	5967/26245	13818/60969	0.359981	1	Cluster-115056.0;Cluster-115056.1;Cluster-39014.1;Cluster-7363.47;Cluster-7363.49;Cluster-7363.50;Cluster-7363.54;Cluster-7363.56;Cluster-1017.0;Cluster-109215.0;Cluster-109215.1;Cluster-109215.2;Cluster-111450.3;Cluster-124097.0;Cluster-124097.7;Cluster-124338.0;Cluster-130100.0;Cluster-130100.1;Cluster-50528.41;Cluster-50528.50;Cluster-50528.71;Cluster-50528.76;Cluster-50528.79;Cluster-93999.0;…	K00001+K00001+K00001+K00001+K00001+K00001+K00001+K00001+K00002+K00002+K00002+K00002+K00002+K00002+K00002+K00002+K00002+K00002+K00002+K00002+K00002+K00002+K00002+K00002+K00006+K00006+K00006+K00006+K00006+K00006+K00006+K00006+K00006+K00006+K00006+K00006+K00006+K00006+K00013+K00013+K00013+K00013+K00016+K00016+K00016+K00021+K00021+K00021+K00021+K00021+K00021+K00021+K00021+K00021+K00021+K00021+K00021+…	5967	https:\\www.genome.jp\dbget-bin\www_bget?map01110
ko00380	Tryptophan metabolism	2/10	4/19	0.750774	1	TRA;IAM	C00398+C02693	2	316/26245	729/60969	0.448705	1	Cluster-113514.0;Cluster-113514.2;Cluster-126911.0;Cluster-129794.0;Cluster-129794.11;Cluster-129794.12;Cluster-129794.13;Cluster-129794.14;Cluster-129794.17;Cluster-129794.18;Cluster-129794.19;Cluster-129794.2;Cluster-129794.3;Cluster-129794.4;Cluster-129794.5;Cluster-129794.8;Cluster-129794.9;Cluster-133601.0;Cluster-133601.1;Cluster-133601.2;Cluster-133601.6;Cluster-133601.7;Cluster-134234.2;C…	K00128+K00128+K00128+K00128+K00128+K00128+K00128+K00128+K00128+K00128+K00128+K00128+K00128+K00128+K00128+K00128+K00128+K00128+K00128+K00128+K00128+K00128+K00128+K00128+K00128+K00128+K00128+K00128+K00128+K00128+K00128+K00128+K00128+K00128+K00128+K00128+K00128+K00128+K00128+K00128+K00128+K00128+K00128+K00128+K00128+K00128+K00128+K00128+K00128+K00128+K00128+K00382+K00382+K00382+K00382+K00382+K00382+…	316	https:\\www.genome.jp\dbget-bin\www_bget?map00380
ko01100	Metabolic pathways	5/10	12/19	0.96011	1	TRA;IAM;cZ;tZ;GA20	C00398+C02693+C15545+C00371+C02035	5	10841/26245	25974/60969	1	1	Cluster-115056.0;Cluster-115056.1;Cluster-39014.1;Cluster-7363.47;Cluster-7363.49;Cluster-7363.50;Cluster-7363.54;Cluster-7363.56;Cluster-1017.0;Cluster-109215.0;Cluster-109215.1;Cluster-109215.2;Cluster-111450.3;Cluster-124097.0;Cluster-124097.7;Cluster-124338.0;Cluster-130100.0;Cluster-130100.1;Cluster-50528.41;Cluster-50528.50;Cluster-50528.71;Cluster-50528.76;Cluster-50528.79;Cluster-93999.0;…	K00001+K00001+K00001+K00001+K00001+K00001+K00001+K00001+K00002+K00002+K00002+K00002+K00002+K00002+K00002+K00002+K00002+K00002+K00002+K00002+K00002+K00002+K00002+K00002+K00008+K00008+K00008+K00008+K00008+K00008+K00008+K00008+K00012+K00012+K00012+K00012+K00012+K00012+K00012+K00012+K00012+K00012+K00012+K00012+K00013+K00013+K00013+K00013+K00016+K00016+K00016+K00020+K00020+K00020+K00020+K00020+K00020+…	10841	https:\\www.genome.jp\dbget-bin\www_bget?map01100
