# Supplementary material for: An integrated targeted metabolome of phytohormones and transcriptomics analysis provides insight into the new generation of crops: Polygonatum kingianum var. grandifolium and Polygonatum kingianum
Source: Front Plant Sci. 2024 Sep 24;15:1464731. doi: 10.3389/fpls.2024.1464731 (PMC11458434; doi:10.3389/fpls.2024.1464731)
Supplement: Supplementary file 11 [file Table9.xlsx]

## Sheet: Sheet1
Supplementary Table S9 The relative expression of the unigenes related to ETH and SL metabolites
geneID	D-bud_vs_X-bud_log2FoldChange	D-rhizome_vs_X-rhizome_log2FoldChange	D-root_vs_X-root_log2FoldChange	KEGG	Length	KEGG pathway	NR	Swissprot	TrEMBL	KOG	GO	Pfam
Cluster-121062.0	NA	NA	1.55606	K23947 2-oxoglutarate-dependent dioxygenase [EC:1.14.11.-] | (RefSeq) 2-oxoglutarate-dependent dioxygenase DAO-like (A)	1516	ko00380: Tryptophan metabolism	uncharacterized protein LOC109829975 isoform X1 [Asparagus officinalis]	ACCO1_BRAJU RecName: Full=1-aminocyclopropane-1-carboxylate oxidase; Short=ACC oxidase; EC=1.14.17.4; AltName: Full=Ethylene-forming enzyme; Short=EFE;	A0A5P1FKE4_ASPOF SubName: Full=Uncharacterized protein {ECO:0000313|EMBL:ONK77050.1};	--	GO:0009815,1-aminocyclopropane-1-carboxylate oxidase activity; GO:0031418,L-ascorbic acid binding; GO:0046872,metal ion binding; GO:0009693,ethylene biosynthetic process; GO:0009835,fruit ripening; GO:0003674,molecular_function; GO:0003824,catalytic activity; GO:0016491,oxidoreductase activity; GO:0016638,oxidoreductase activity, acting on the CH-NH2 group of donors; GO:0016641,oxidoreductase act…	2OG-Fe(II) oxygenase superfamily
Cluster-121062.1	-2.63843	1.52964	0.960632	K23947 2-oxoglutarate-dependent dioxygenase [EC:1.14.11.-] | (RefSeq) 2-oxoglutarate-dependent dioxygenase DAO-like (A)	1516	ko00380: Tryptophan metabolism	uncharacterized protein LOC109829975 isoform X1 [Asparagus officinalis]	ACCO1_BRAJU RecName: Full=1-aminocyclopropane-1-carboxylate oxidase; Short=ACC oxidase; EC=1.14.17.4; AltName: Full=Ethylene-forming enzyme; Short=EFE;	A0A5P1FKE4_ASPOF SubName: Full=Uncharacterized protein {ECO:0000313|EMBL:ONK77050.1};	--	GO:0009815,1-aminocyclopropane-1-carboxylate oxidase activity; GO:0031418,L-ascorbic acid binding; GO:0046872,metal ion binding; GO:0009693,ethylene biosynthetic process; GO:0009835,fruit ripening; GO:0003674,molecular_function; GO:0003824,catalytic activity; GO:0016491,oxidoreductase activity; GO:0016638,oxidoreductase activity, acting on the CH-NH2 group of donors; GO:0016641,oxidoreductase act…	2OG-Fe(II) oxygenase superfamily
Cluster-121062.2	7.10919	5.65304	10.1728	K23947 2-oxoglutarate-dependent dioxygenase [EC:1.14.11.-] | (RefSeq) 2-oxoglutarate-dependent dioxygenase DAO-like (A)	2576	ko00380: Tryptophan metabolism	uncharacterized protein LOC109829975 isoform X1 [Asparagus officinalis]	ACCO1_BRAJU RecName: Full=1-aminocyclopropane-1-carboxylate oxidase; Short=ACC oxidase; EC=1.14.17.4; AltName: Full=Ethylene-forming enzyme; Short=EFE;	A0A5P1FKE4_ASPOF SubName: Full=Uncharacterized protein {ECO:0000313|EMBL:ONK77050.1};	--	GO:0009815,1-aminocyclopropane-1-carboxylate oxidase activity; GO:0031418,L-ascorbic acid binding; GO:0046872,metal ion binding; GO:0009693,ethylene biosynthetic process; GO:0009835,fruit ripening; GO:0003674,molecular_function; GO:0003824,catalytic activity; GO:0016491,oxidoreductase activity; GO:0016638,oxidoreductase activity, acting on the CH-NH2 group of donors; GO:0016641,oxidoreductase act…	2OG-Fe(II) oxygenase superfamily
Cluster-121062.5	4.18474	5.30536	5.11883	K23947 2-oxoglutarate-dependent dioxygenase [EC:1.14.11.-] | (RefSeq) 2-oxoglutarate-dependent dioxygenase DAO-like (A)	3090	ko00380: Tryptophan metabolism	uncharacterized protein LOC109829975 isoform X1 [Asparagus officinalis]	ACCO1_BRAJU RecName: Full=1-aminocyclopropane-1-carboxylate oxidase; Short=ACC oxidase; EC=1.14.17.4; AltName: Full=Ethylene-forming enzyme; Short=EFE;	A0A5P1FKE4_ASPOF SubName: Full=Uncharacterized protein {ECO:0000313|EMBL:ONK77050.1};	--	GO:0009815,1-aminocyclopropane-1-carboxylate oxidase activity; GO:0031418,L-ascorbic acid binding; GO:0046872,metal ion binding; GO:0009693,ethylene biosynthetic process; GO:0009835,fruit ripening; GO:0003674,molecular_function; GO:0003824,catalytic activity; GO:0016491,oxidoreductase activity; GO:0016638,oxidoreductase activity, acting on the CH-NH2 group of donors; GO:0016641,oxidoreductase act…	non-haem dioxygenase in morphine synthesis N-terminal
Cluster-121062.6	6.38479	3.2134	6.47949	K05933 aminocyclopropanecarboxylate oxidase [EC:1.14.17.4] | (RefSeq) 1-aminocyclopropane-1-carboxylate oxidase-like (A)	2994	ko00270: Cysteine and methionine metabolism; ko01100: Metabolic pathways; ko01110: Biosynthesis of secondary metabolites	uncharacterized protein LOC109829975 isoform X1 [Asparagus officinalis]	ACCO3_ARATH RecName: Full=1-aminocyclopropane-1-carboxylate oxidase 3; Short=ACC oxidase 3; Short=AtACO3; EC=1.14.17.4 {ECO:0000305|PubMed:19513806};	A0A5P1FKE4_ASPOF SubName: Full=Uncharacterized protein {ECO:0000313|EMBL:ONK77050.1};	--	GO:0005829,cytosol; GO:0009815,1-aminocyclopropane-1-carboxylate oxidase activity; GO:0051213,dioxygenase activity; GO:0031418,L-ascorbic acid binding; GO:0046872,metal ion binding; GO:0071398,cellular response to fatty acid; GO:0006952,defense response; GO:0009693,ethylene biosynthetic process; GO:0003674,molecular_function; GO:0003824,catalytic activity; GO:0016491,oxidoreductase activity; GO:0…	2OG-Fe(II) oxygenase superfamily
Cluster-43261.7	7.89324	8.36463	7.53351	K05933 aminocyclopropanecarboxylate oxidase [EC:1.14.17.4] | (RefSeq) 1-aminocyclopropane-1-carboxylate oxidase-like (A)	1326	ko00270: Cysteine and methionine metabolism; ko01100: Metabolic pathways; ko01110: Biosynthesis of secondary metabolites	1-aminocyclopropane-1-carboxylate oxidase-like [Asparagus officinalis]	ACCO3_ARATH RecName: Full=1-aminocyclopropane-1-carboxylate oxidase 3; Short=ACC oxidase 3; Short=AtACO3; EC=1.14.17.4 {ECO:0000305|PubMed:19513806};	A0A2Z2GNB9_NARTA SubName: Full=ACC oxidase {ECO:0000313|EMBL:ARO76406.1}; Flags: Fragment;	Iron/ascorbate family oxidoreductases	GO:0005829,cytosol; GO:0009815,1-aminocyclopropane-1-carboxylate oxidase activity; GO:0051213,dioxygenase activity; GO:0031418,L-ascorbic acid binding; GO:0046872,metal ion binding; GO:0071398,cellular response to fatty acid; GO:0006952,defense response; GO:0009693,ethylene biosynthetic process; GO:0003674,molecular_function; GO:0003824,catalytic activity; GO:0016491,oxidoreductase activity; GO:0…	--
Cluster-48114.26	8.04641	6.72581	7.69891	K05933 aminocyclopropanecarboxylate oxidase [EC:1.14.17.4] | (RefSeq) 1-aminocyclopropane-1-carboxylate oxidase 5 (A)	665	ko00270: Cysteine and methionine metabolism; ko01100: Metabolic pathways; ko01110: Biosynthesis of secondary metabolites	ACC oxidase, partial [Oncidium hybrid cultivar]	ACCO_MUSAC RecName: Full=1-aminocyclopropane-1-carboxylate oxidase; Short=ACC oxidase; EC=1.14.17.4; AltName: Full=Ethylene-forming enzyme; Short=EFE;	Q2UZT6_ONCHC SubName: Full=ACC oxidase {ECO:0000313|EMBL:AAQ07452.1}; Flags: Fragment;	Iron/ascorbate family oxidoreductases	GO:0009815,1-aminocyclopropane-1-carboxylate oxidase activity; GO:0031418,L-ascorbic acid binding; GO:0046872,metal ion binding; GO:0009693,ethylene biosynthetic process; GO:0009835,fruit ripening; GO:0003674,molecular_function; GO:0003824,catalytic activity; GO:0016491,oxidoreductase activity; GO:0016638,oxidoreductase activity, acting on the CH-NH2 group of donors; GO:0016641,oxidoreductase act…	--
Cluster-48114.50	0.66518	NA	2.78829	K05933 aminocyclopropanecarboxylate oxidase [EC:1.14.17.4] | (RefSeq) 1-aminocyclopropane-1-carboxylate oxidase (A)	936	ko00270: Cysteine and methionine metabolism; ko01100: Metabolic pathways; ko01110: Biosynthesis of secondary metabolites	1-aminocyclopropane-1-carboxylate oxidase [Asparagus officinalis]	ACCO_MUSAC RecName: Full=1-aminocyclopropane-1-carboxylate oxidase; Short=ACC oxidase; EC=1.14.17.4; AltName: Full=Ethylene-forming enzyme; Short=EFE;	A0A5P1E4Q4_ASPOF RecName: Full=Fe2OG dioxygenase domain-containing protein {ECO:0000259|PROSITE:PS51471};	Iron/ascorbate family oxidoreductases	GO:0009815,1-aminocyclopropane-1-carboxylate oxidase activity; GO:0031418,L-ascorbic acid binding; GO:0046872,metal ion binding; GO:0009693,ethylene biosynthetic process; GO:0009835,fruit ripening; GO:0003674,molecular_function; GO:0003824,catalytic activity; GO:0016491,oxidoreductase activity; GO:0016638,oxidoreductase activity, acting on the CH-NH2 group of donors; GO:0016641,oxidoreductase act…	non-haem dioxygenase in morphine synthesis N-terminal
Cluster-48114.62	0.0738799	NA	2.02211	K05933 aminocyclopropanecarboxylate oxidase [EC:1.14.17.4] | (RefSeq) 1-aminocyclopropane-1-carboxylate oxidase-like (A)	658	ko00270: Cysteine and methionine metabolism; ko01100: Metabolic pathways; ko01110: Biosynthesis of secondary metabolites	1-aminocyclopropane-1-carboxylate oxidase-like [Asparagus officinalis]	ACCO5_ARATH RecName: Full=1-aminocyclopropane-1-carboxylate oxidase 5; Short=ACC oxidase 5; Short=AtACO5; EC=1.14.17.4;	A0A5P1FL88_ASPOF RecName: Full=Fe2OG dioxygenase domain-containing protein {ECO:0000259|PROSITE:PS51471};	Iron/ascorbate family oxidoreductases	GO:0009815,1-aminocyclopropane-1-carboxylate oxidase activity; GO:0051213,dioxygenase activity; GO:0031418,L-ascorbic acid binding; GO:0046872,metal ion binding; GO:0006952,defense response; GO:0009693,ethylene biosynthetic process; GO:0003674,molecular_function; GO:0003824,catalytic activity; GO:0016491,oxidoreductase activity; GO:0016638,oxidoreductase activity, acting on the CH-NH2 group of do…	2OG-Fe(II) oxygenase superfamily
Cluster-48114.63	NA	NA	9.49102	K05933 aminocyclopropanecarboxylate oxidase [EC:1.14.17.4] | (RefSeq) 1-aminocyclopropane-1-carboxylate oxidase (A)	681	ko00270: Cysteine and methionine metabolism; ko01100: Metabolic pathways; ko01110: Biosynthesis of secondary metabolites	1-aminocyclopropane-1-carboxylate oxidase [Asparagus officinalis]	ACCO5_ARATH RecName: Full=1-aminocyclopropane-1-carboxylate oxidase 5; Short=ACC oxidase 5; Short=AtACO5; EC=1.14.17.4;	A0A5P1E4Q4_ASPOF RecName: Full=Fe2OG dioxygenase domain-containing protein {ECO:0000259|PROSITE:PS51471};	Iron/ascorbate family oxidoreductases	GO:0009815,1-aminocyclopropane-1-carboxylate oxidase activity; GO:0051213,dioxygenase activity; GO:0031418,L-ascorbic acid binding; GO:0046872,metal ion binding; GO:0006952,defense response; GO:0009693,ethylene biosynthetic process; GO:0003674,molecular_function; GO:0003824,catalytic activity; GO:0016491,oxidoreductase activity; GO:0016638,oxidoreductase activity, acting on the CH-NH2 group of do…	2OG-Fe(II) oxygenase superfamily
Cluster-85728.10	10.5548	9.81183	9.48884	K05933 aminocyclopropanecarboxylate oxidase [EC:1.14.17.4] | (RefSeq) 1-aminocyclopropane-1-carboxylate oxidase-like (A)	1149	ko00270: Cysteine and methionine metabolism; ko01100: Metabolic pathways; ko01110: Biosynthesis of secondary metabolites	1-aminocyclopropane-1-carboxylate oxidase [Hosta ventricosa]	ACCO1_PETHY RecName: Full=1-aminocyclopropane-1-carboxylate oxidase 1; Short=ACC oxidase 1; Short=ACCO; EC=1.14.17.4; AltName: Full=Ethylene-forming enzyme; Short=EFE;	M1GPS3_9ASPA SubName: Full=1-aminocyclopropane-1-carboxylate oxidase {ECO:0000313|EMBL:AGE15421.1};	Iron/ascorbate family oxidoreductases	GO:0009815,1-aminocyclopropane-1-carboxylate oxidase activity; GO:0016706,2-oxoglutarate-dependent dioxygenase activity; GO:0031418,L-ascorbic acid binding; GO:0046872,metal ion binding; GO:0009805,coumarin biosynthetic process; GO:0009693,ethylene biosynthetic process; GO:0002238,response to molecule of fungal origin; GO:0003674,molecular_function; GO:0003824,catalytic activity; GO:0016491,oxido…	2OG-Fe(II) oxygenase superfamily
Cluster-85728.16	8.68854	7.58589	7.77113	K05933 aminocyclopropanecarboxylate oxidase [EC:1.14.17.4] | (RefSeq) 1-aminocyclopropane-1-carboxylate oxidase-like (A)	407	ko00270: Cysteine and methionine metabolism; ko01100: Metabolic pathways; ko01110: Biosynthesis of secondary metabolites	ACC oxidase, partial [Narcissus tazetta subsp. chinensis]	ACCO_PRUMU RecName: Full=1-aminocyclopropane-1-carboxylate oxidase; Short=ACC oxidase; EC=1.14.17.4; AltName: Full=Ethylene-forming enzyme; Short=EFE;	A0A2Z2GNB9_NARTA SubName: Full=ACC oxidase {ECO:0000313|EMBL:ARO76406.1}; Flags: Fragment;	Iron/ascorbate family oxidoreductases	GO:0009815,1-aminocyclopropane-1-carboxylate oxidase activity; GO:0031418,L-ascorbic acid binding; GO:0046872,metal ion binding; GO:0009693,ethylene biosynthetic process; GO:0009835,fruit ripening; GO:0003674,molecular_function; GO:0003824,catalytic activity; GO:0016491,oxidoreductase activity; GO:0016638,oxidoreductase activity, acting on the CH-NH2 group of donors; GO:0016641,oxidoreductase act…	2OG-Fe(II) oxygenase superfamily
Cluster-85728.18	-0.709261	0.595898	1.18785	K05933 aminocyclopropanecarboxylate oxidase [EC:1.14.17.4] | (RefSeq) 1-aminocyclopropane-1-carboxylate oxidase 1-like (A)	1516	ko00270: Cysteine and methionine metabolism; ko01100: Metabolic pathways; ko01110: Biosynthesis of secondary metabolites	ACC oxidase, partial [Narcissus tazetta subsp. chinensis]	ACCO_ACTDE RecName: Full=1-aminocyclopropane-1-carboxylate oxidase; Short=ACC oxidase; EC=1.14.17.4; AltName: Full=Ethylene-forming enzyme; Short=EFE;	A0A2Z2GNB9_NARTA SubName: Full=ACC oxidase {ECO:0000313|EMBL:ARO76406.1}; Flags: Fragment;	Iron/ascorbate family oxidoreductases	GO:0009815,1-aminocyclopropane-1-carboxylate oxidase activity; GO:0031418,L-ascorbic acid binding; GO:0046872,metal ion binding; GO:0016705,oxidoreductase activity, acting on paired donors, with incorporation or reduction of molecular oxygen; GO:0009693,ethylene biosynthetic process; GO:0009835,fruit ripening; GO:0003674,molecular_function; GO:0003824,catalytic activity; GO:0016491,oxidoreductase…	2OG-Fe(II) oxygenase superfamily
Cluster-85728.2	-2.15293	1.224	1.85807	K05933 aminocyclopropanecarboxylate oxidase [EC:1.14.17.4] | (RefSeq) 1-aminocyclopropane-1-carboxylate oxidase-like (A)	1034	ko00270: Cysteine and methionine metabolism; ko01100: Metabolic pathways; ko01110: Biosynthesis of secondary metabolites	ACC oxidase [Narcissus tazetta subsp. chinensis]	ACCO1_PETHY RecName: Full=1-aminocyclopropane-1-carboxylate oxidase 1; Short=ACC oxidase 1; Short=ACCO; EC=1.14.17.4; AltName: Full=Ethylene-forming enzyme; Short=EFE;	A0A2Z2GIK2_NARTA SubName: Full=ACC oxidase {ECO:0000313|EMBL:ARO76404.1};	Iron/ascorbate family oxidoreductases	GO:0009815,1-aminocyclopropane-1-carboxylate oxidase activity; GO:0016706,2-oxoglutarate-dependent dioxygenase activity; GO:0031418,L-ascorbic acid binding; GO:0046872,metal ion binding; GO:0009805,coumarin biosynthetic process; GO:0009693,ethylene biosynthetic process; GO:0002238,response to molecule of fungal origin; GO:0003674,molecular_function; GO:0003824,catalytic activity; GO:0016491,oxido…	2OG-Fe(II) oxygenase superfamily
Cluster-85728.5	7.58001	NA	6.86225	K05933 aminocyclopropanecarboxylate oxidase [EC:1.14.17.4] | (RefSeq) 1-aminocyclopropane-1-carboxylate oxidase (A)	573	ko00270: Cysteine and methionine metabolism; ko01100: Metabolic pathways; ko01110: Biosynthesis of secondary metabolites	1-aminocyclopropane-1-carboxylate oxidase, putative [Ricinus communis]	ACCO1_PETHY RecName: Full=1-aminocyclopropane-1-carboxylate oxidase 1; Short=ACC oxidase 1; Short=ACCO; EC=1.14.17.4; AltName: Full=Ethylene-forming enzyme; Short=EFE;	B9T829_RICCO SubName: Full=1-aminocyclopropane-1-carboxylate oxidase, putative {ECO:0000313|EMBL:EEF27986.1}; EC=1.14.17.4 {ECO:0000313|EMBL:EEF27986.1};	Iron/ascorbate family oxidoreductases	GO:0009815,1-aminocyclopropane-1-carboxylate oxidase activity; GO:0016706,2-oxoglutarate-dependent dioxygenase activity; GO:0031418,L-ascorbic acid binding; GO:0046872,metal ion binding; GO:0009805,coumarin biosynthetic process; GO:0009693,ethylene biosynthetic process; GO:0002238,response to molecule of fungal origin; GO:0003674,molecular_function; GO:0003824,catalytic activity; GO:0016491,oxido…	2OG-Fe(II) oxygenase superfamily
Cluster-92456.3	NA	NA	8.75783	K05933 aminocyclopropanecarboxylate oxidase [EC:1.14.17.4] | (RefSeq) 1-aminocyclopropane-1-carboxylate oxidase 1-like (A)	1317	ko00270: Cysteine and methionine metabolism; ko01100: Metabolic pathways; ko01110: Biosynthesis of secondary metabolites	1-aminocyclopropane-1-carboxylate oxidase 1-like [Asparagus officinalis]	ACCO1_ARATH RecName: Full=1-aminocyclopropane-1-carboxylate oxidase 1; Short=ACC oxidase 1; Short=AtACO1; EC=1.14.17.4;	A0A8B7CST6_PHODC SubName: Full=1-aminocyclopropane-1-carboxylate oxidase 1-like {ECO:0000313|RefSeq:XP_008805775.2};	Iron/ascorbate family oxidoreductases	GO:0009815,1-aminocyclopropane-1-carboxylate oxidase activity; GO:0031418,L-ascorbic acid binding; GO:0046872,metal ion binding; GO:0071398,cellular response to fatty acid; GO:0071732,cellular response to nitric oxide; GO:0051365,cellular response to potassium ion starvation; GO:0006952,defense response; GO:0009693,ethylene biosynthetic process; GO:0003674,molecular_function; GO:0003824,catalytic…	2OG-Fe(II) oxygenase superfamily
Cluster-130813.2	6.96964	NA	NA	K14270 aminotransferase | (RefSeq) probable aminotransferase ACS12 (A)	2126	--	probable aminotransferase ACS12 [Asparagus officinalis]	1A16_ORYSJ RecName: Full=1-aminocyclopropane-1-carboxylate synthase 6 {ECO:0000303|PubMed:17012402}; Short=ACC synthase 6 {ECO:0000303|PubMed:17012402}; Short=OsACS6 {ECO:0000303|PubMed:17012402}; EC=4.4.1.14 {ECO:0000250|UniProtKB:P37821}; AltName: Full=Protein SUBSTANDARD STARCH GRAIN 6 {ECO:0000303|PubMed:26792122};	A0A1R3L5P9_ASPOF RecName: Full=Aminotran_1_2 domain-containing protein {ECO:0000259|Pfam:PF00155};	1-aminocyclopropane-1-carboxylate synthase, and related proteins	GO:0033097,amyloplast membrane; GO:0016829,lyase activity; GO:0030170,pyridoxal phosphate binding; GO:0008483,transaminase activity; GO:0006520,cellular amino acid metabolic process; GO:0009693,ethylene biosynthetic process; GO:0003674,molecular_function; GO:0003824,catalytic activity; GO:0005488,binding; GO:0019842,vitamin binding; GO:0036094,small molecule binding; GO:0043167,ion binding; GO:00…	Aminotransferase class I and II
Cluster-130813.7	8.10986	7.09232	8.43673	K14270 aminotransferase | (RefSeq) probable aminotransferase ACS12 (A)	2084	--	probable aminotransferase ACS12 [Asparagus officinalis]	1A16_ORYSJ RecName: Full=1-aminocyclopropane-1-carboxylate synthase 6 {ECO:0000303|PubMed:17012402}; Short=ACC synthase 6 {ECO:0000303|PubMed:17012402}; Short=OsACS6 {ECO:0000303|PubMed:17012402}; EC=4.4.1.14 {ECO:0000250|UniProtKB:P37821}; AltName: Full=Protein SUBSTANDARD STARCH GRAIN 6 {ECO:0000303|PubMed:26792122};	A0A1R3L5P9_ASPOF RecName: Full=Aminotran_1_2 domain-containing protein {ECO:0000259|Pfam:PF00155};	1-aminocyclopropane-1-carboxylate synthase, and related proteins	GO:0033097,amyloplast membrane; GO:0016829,lyase activity; GO:0030170,pyridoxal phosphate binding; GO:0008483,transaminase activity; GO:0006520,cellular amino acid metabolic process; GO:0009693,ethylene biosynthetic process; GO:0003674,molecular_function; GO:0003824,catalytic activity; GO:0005488,binding; GO:0019842,vitamin binding; GO:0036094,small molecule binding; GO:0043167,ion binding; GO:00…	Aminotransferase class I and II
Cluster-130813.8	1.2365	1.73623	1.68971	K14270 aminotransferase | (RefSeq) probable aminotransferase ACS12 (A)	1586	--	probable aminotransferase ACS12 [Asparagus officinalis]	1A16_ORYSJ RecName: Full=1-aminocyclopropane-1-carboxylate synthase 6 {ECO:0000303|PubMed:17012402}; Short=ACC synthase 6 {ECO:0000303|PubMed:17012402}; Short=OsACS6 {ECO:0000303|PubMed:17012402}; EC=4.4.1.14 {ECO:0000250|UniProtKB:P37821}; AltName: Full=Protein SUBSTANDARD STARCH GRAIN 6 {ECO:0000303|PubMed:26792122};	A0A1R3L5P9_ASPOF RecName: Full=Aminotran_1_2 domain-containing protein {ECO:0000259|Pfam:PF00155};	1-aminocyclopropane-1-carboxylate synthase, and related proteins	GO:0033097,amyloplast membrane; GO:0016829,lyase activity; GO:0030170,pyridoxal phosphate binding; GO:0008483,transaminase activity; GO:0006520,cellular amino acid metabolic process; GO:0009693,ethylene biosynthetic process; GO:0003674,molecular_function; GO:0003824,catalytic activity; GO:0005488,binding; GO:0019842,vitamin binding; GO:0036094,small molecule binding; GO:0043167,ion binding; GO:00…	Aminotransferase class I and II
Cluster-131141.11	8.86962	3.96479	5.9148	K14270 aminotransferase | (RefSeq) LOW QUALITY PROTEIN: probable aminotransferase ACS12 (A)	1203	--	LOW QUALITY PROTEIN: probable aminotransferase ACS12 [Asparagus officinalis]	1A16_ORYSJ RecName: Full=1-aminocyclopropane-1-carboxylate synthase 6 {ECO:0000303|PubMed:17012402}; Short=ACC synthase 6 {ECO:0000303|PubMed:17012402}; Short=OsACS6 {ECO:0000303|PubMed:17012402}; EC=4.4.1.14 {ECO:0000250|UniProtKB:P37821}; AltName: Full=Protein SUBSTANDARD STARCH GRAIN 6 {ECO:0000303|PubMed:26792122};	A0A8B8ZQV2_PHODC SubName: Full=probable aminotransferase ACS12 {ECO:0000313|RefSeq:XP_008777458.1, ECO:0000313|RefSeq:XP_038973864.1};	1-aminocyclopropane-1-carboxylate synthase, and related proteins	GO:0033097,amyloplast membrane; GO:0016829,lyase activity; GO:0030170,pyridoxal phosphate binding; GO:0008483,transaminase activity; GO:0006520,cellular amino acid metabolic process; GO:0009693,ethylene biosynthetic process; GO:0003674,molecular_function; GO:0003824,catalytic activity; GO:0005488,binding; GO:0019842,vitamin binding; GO:0036094,small molecule binding; GO:0043167,ion binding; GO:00…	Aminotransferase class I and II
Cluster-131141.6	4.28526	4.59274	1.51226	K14270 aminotransferase | (RefSeq) LOW QUALITY PROTEIN: probable aminotransferase ACS12 (A)	1383	--	LOW QUALITY PROTEIN: probable aminotransferase ACS12 [Asparagus officinalis]	1A16_ORYSJ RecName: Full=1-aminocyclopropane-1-carboxylate synthase 6 {ECO:0000303|PubMed:17012402}; Short=ACC synthase 6 {ECO:0000303|PubMed:17012402}; Short=OsACS6 {ECO:0000303|PubMed:17012402}; EC=4.4.1.14 {ECO:0000250|UniProtKB:P37821}; AltName: Full=Protein SUBSTANDARD STARCH GRAIN 6 {ECO:0000303|PubMed:26792122};	A0A8B8ZQV2_PHODC SubName: Full=probable aminotransferase ACS12 {ECO:0000313|RefSeq:XP_008777458.1, ECO:0000313|RefSeq:XP_038973864.1};	1-aminocyclopropane-1-carboxylate synthase, and related proteins	GO:0033097,amyloplast membrane; GO:0016829,lyase activity; GO:0030170,pyridoxal phosphate binding; GO:0008483,transaminase activity; GO:0006520,cellular amino acid metabolic process; GO:0009693,ethylene biosynthetic process; GO:0003674,molecular_function; GO:0003824,catalytic activity; GO:0005488,binding; GO:0019842,vitamin binding; GO:0036094,small molecule binding; GO:0043167,ion binding; GO:00…	Aminotransferase class I and II
Cluster-131141.8	9.97535	10.0753	9.8115	K14270 aminotransferase | (RefSeq) LOW QUALITY PROTEIN: probable aminotransferase ACS12 (A)	2393	--	LOW QUALITY PROTEIN: probable aminotransferase ACS12 [Asparagus officinalis]	1A16_ORYSJ RecName: Full=1-aminocyclopropane-1-carboxylate synthase 6 {ECO:0000303|PubMed:17012402}; Short=ACC synthase 6 {ECO:0000303|PubMed:17012402}; Short=OsACS6 {ECO:0000303|PubMed:17012402}; EC=4.4.1.14 {ECO:0000250|UniProtKB:P37821}; AltName: Full=Protein SUBSTANDARD STARCH GRAIN 6 {ECO:0000303|PubMed:26792122};	A0A1D1ZGC7_9ARAE SubName: Full=Putative aminotransferase ACS12 {ECO:0000313|EMBL:JAT65927.1}; Flags: Fragment;	1-aminocyclopropane-1-carboxylate synthase, and related proteins	GO:0033097,amyloplast membrane; GO:0016829,lyase activity; GO:0030170,pyridoxal phosphate binding; GO:0008483,transaminase activity; GO:0006520,cellular amino acid metabolic process; GO:0009693,ethylene biosynthetic process; GO:0003674,molecular_function; GO:0003824,catalytic activity; GO:0005488,binding; GO:0019842,vitamin binding; GO:0036094,small molecule binding; GO:0043167,ion binding; GO:00…	Aminotransferase class I and II
Cluster-131141.9	1.59487	1.5263	2.20662	K14270 aminotransferase | (RefSeq) LOW QUALITY PROTEIN: probable aminotransferase ACS12 (A)	490	--	LOW QUALITY PROTEIN: probable aminotransferase ACS12 [Asparagus officinalis]	1A16_ORYSJ RecName: Full=1-aminocyclopropane-1-carboxylate synthase 6 {ECO:0000303|PubMed:17012402}; Short=ACC synthase 6 {ECO:0000303|PubMed:17012402}; Short=OsACS6 {ECO:0000303|PubMed:17012402}; EC=4.4.1.14 {ECO:0000250|UniProtKB:P37821}; AltName: Full=Protein SUBSTANDARD STARCH GRAIN 6 {ECO:0000303|PubMed:26792122};	A0A835UDF1_VANPL RecName: Full=Aminotran_1_2 domain-containing protein {ECO:0000259|Pfam:PF00155};	1-aminocyclopropane-1-carboxylate synthase, and related proteins	GO:0033097,amyloplast membrane; GO:0016829,lyase activity; GO:0030170,pyridoxal phosphate binding; GO:0008483,transaminase activity; GO:0006520,cellular amino acid metabolic process; GO:0009693,ethylene biosynthetic process; GO:0003674,molecular_function; GO:0003824,catalytic activity; GO:0005488,binding; GO:0019842,vitamin binding; GO:0036094,small molecule binding; GO:0043167,ion binding; GO:00…	Aminotransferase class I and II
Cluster-135137.1	NA	NA	9.37615	K20772 1-aminocyclopropane-1-carboxylate synthase 1/2/6 [EC:4.4.1.14] | (RefSeq) LOW QUALITY PROTEIN: 1-aminocyclopropane-1-carboxylate synthase-like (A)	2020	ko00270: Cysteine and methionine metabolism; ko01100: Metabolic pathways; ko01110: Biosynthesis of secondary metabolites; ko04016: MAPK signaling pathway - plant	LOW QUALITY PROTEIN: 1-aminocyclopropane-1-carboxylate synthase-like [Asparagus officinalis]	1A1C_SOYBN RecName: Full=1-aminocyclopropane-1-carboxylate synthase; Short=ACC synthase; EC=4.4.1.14; AltName: Full=S-adenosyl-L-methionine methylthioadenosine-lyase;	D2K6M8_NARTA SubName: Full=1-aminocyclopropane-1-carboxylic acid synthase {ECO:0000313|EMBL:ACZ54911.3};	1-aminocyclopropane-1-carboxylate synthase, and related proteins	GO:0016847,1-aminocyclopropane-1-carboxylate synthase activity; GO:0030170,pyridoxal phosphate binding; GO:0008483,transaminase activity; GO:0006520,cellular amino acid metabolic process; GO:0009693,ethylene biosynthetic process; GO:0009835,fruit ripening; GO:0003674,molecular_function; GO:0003824,catalytic activity; GO:0016829,lyase activity; GO:0016846,carbon-sulfur lyase activity; GO:0005488,b…	Aminotransferase class I and II
Cluster-135137.2	7.15024	NA	9.90395	K20772 1-aminocyclopropane-1-carboxylate synthase 1/2/6 [EC:4.4.1.14] | (RefSeq) LOW QUALITY PROTEIN: 1-aminocyclopropane-1-carboxylate synthase-like (A)	1820	ko00270: Cysteine and methionine metabolism; ko01100: Metabolic pathways; ko01110: Biosynthesis of secondary metabolites; ko04016: MAPK signaling pathway - plant	LOW QUALITY PROTEIN: 1-aminocyclopropane-1-carboxylate synthase-like [Asparagus officinalis]	1A1C_TOBAC RecName: Full=1-aminocyclopropane-1-carboxylate synthase; Short=ACC synthase; EC=4.4.1.14; AltName: Full=S-adenosyl-L-methionine methylthioadenosine-lyase;	D2K6M8_NARTA SubName: Full=1-aminocyclopropane-1-carboxylic acid synthase {ECO:0000313|EMBL:ACZ54911.3};	1-aminocyclopropane-1-carboxylate synthase, and related proteins	GO:0016847,1-aminocyclopropane-1-carboxylate synthase activity; GO:0030170,pyridoxal phosphate binding; GO:0008483,transaminase activity; GO:0006520,cellular amino acid metabolic process; GO:0009693,ethylene biosynthetic process; GO:0009835,fruit ripening; GO:0003674,molecular_function; GO:0003824,catalytic activity; GO:0016829,lyase activity; GO:0016846,carbon-sulfur lyase activity; GO:0005488,b…	Aminotransferase class I and II
Cluster-135137.3	7.88387	NA	11.2728	K20772 1-aminocyclopropane-1-carboxylate synthase 1/2/6 [EC:4.4.1.14] | (RefSeq) LOW QUALITY PROTEIN: 1-aminocyclopropane-1-carboxylate synthase-like (A)	1915	ko00270: Cysteine and methionine metabolism; ko01100: Metabolic pathways; ko01110: Biosynthesis of secondary metabolites; ko04016: MAPK signaling pathway - plant	LOW QUALITY PROTEIN: 1-aminocyclopropane-1-carboxylate synthase-like [Asparagus officinalis]	1A1C_SOYBN RecName: Full=1-aminocyclopropane-1-carboxylate synthase; Short=ACC synthase; EC=4.4.1.14; AltName: Full=S-adenosyl-L-methionine methylthioadenosine-lyase;	D2K6M8_NARTA SubName: Full=1-aminocyclopropane-1-carboxylic acid synthase {ECO:0000313|EMBL:ACZ54911.3};	1-aminocyclopropane-1-carboxylate synthase, and related proteins	GO:0016847,1-aminocyclopropane-1-carboxylate synthase activity; GO:0030170,pyridoxal phosphate binding; GO:0008483,transaminase activity; GO:0006520,cellular amino acid metabolic process; GO:0009693,ethylene biosynthetic process; GO:0009835,fruit ripening; GO:0003674,molecular_function; GO:0003824,catalytic activity; GO:0016829,lyase activity; GO:0016846,carbon-sulfur lyase activity; GO:0005488,b…	Aminotransferase class I and II
Cluster-135137.7	3.42856	NA	4.18744	K20772 1-aminocyclopropane-1-carboxylate synthase 1/2/6 [EC:4.4.1.14] | (RefSeq) LOW QUALITY PROTEIN: 1-aminocyclopropane-1-carboxylate synthase-like (A)	1602	ko00270: Cysteine and methionine metabolism; ko01100: Metabolic pathways; ko01110: Biosynthesis of secondary metabolites; ko04016: MAPK signaling pathway - plant	LOW QUALITY PROTEIN: 1-aminocyclopropane-1-carboxylate synthase-like [Asparagus officinalis]	1A1C_SOYBN RecName: Full=1-aminocyclopropane-1-carboxylate synthase; Short=ACC synthase; EC=4.4.1.14; AltName: Full=S-adenosyl-L-methionine methylthioadenosine-lyase;	D2K6M8_NARTA SubName: Full=1-aminocyclopropane-1-carboxylic acid synthase {ECO:0000313|EMBL:ACZ54911.3};	1-aminocyclopropane-1-carboxylate synthase, and related proteins	GO:0016847,1-aminocyclopropane-1-carboxylate synthase activity; GO:0030170,pyridoxal phosphate binding; GO:0008483,transaminase activity; GO:0006520,cellular amino acid metabolic process; GO:0009693,ethylene biosynthetic process; GO:0009835,fruit ripening; GO:0003674,molecular_function; GO:0003824,catalytic activity; GO:0016829,lyase activity; GO:0016846,carbon-sulfur lyase activity; GO:0005488,b…	Aminotransferase class I and II
Cluster-59673.0	NA	NA	2.27413	K01762 1-aminocyclopropane-1-carboxylate synthase [EC:4.4.1.14] | (RefSeq) 1-aminocyclopropane-1-carboxylate synthase 7 (A)	1479	ko00270: Cysteine and methionine metabolism; ko01100: Metabolic pathways; ko01110: Biosynthesis of secondary metabolites	1-aminocyclopropane-1-carboxylate synthase [Hosta ventricosa]	1A17_ARATH RecName: Full=1-aminocyclopropane-1-carboxylate synthase 7; Short=ACC synthase 7; EC=4.4.1.14; AltName: Full=S-adenosyl-L-methionine methylthioadenosine-lyase 7;	M1GMS2_9ASPA SubName: Full=1-aminocyclopropane-1-carboxylate synthase {ECO:0000313|EMBL:AGE15420.1};	1-aminocyclopropane-1-carboxylate synthase, and related proteins	GO:0016847,1-aminocyclopropane-1-carboxylate synthase activity; GO:0042802,identical protein binding; GO:0030170,pyridoxal phosphate binding; GO:0008483,transaminase activity; GO:0006520,cellular amino acid metabolic process; GO:0009693,ethylene biosynthetic process; GO:0009835,fruit ripening; GO:0003674,molecular_function; GO:0003824,catalytic activity; GO:0016829,lyase activity; GO:0016846,carb…	Aminotransferase class I and II
Cluster-100787.0	-3.72372	-8.73654	-5.45835	K18813 cyclin D7, plant | (RefSeq) putative cyclin-D7-1 isoform X1 (A)	2459	--	putative cyclin-D7-1 isoform X1 [Asparagus officinalis]	CCD71_ORYSJ RecName: Full=Putative cyclin-D7-1; AltName: Full=G1/S-specific cyclin-D7-1; Short=CycD7;1;	A0A5P1EBN3_ASPOF RecName: Full=Cyclin N-terminal domain-containing protein {ECO:0000259|PROSITE:PS00292};	G1/S-specific cyclin D	GO:0000307,cyclin-dependent protein kinase holoenzyme complex; GO:0005737,cytoplasm; GO:0005634,nucleus; GO:0016538,cyclin-dependent protein serine/threonine kinase regulator activity; GO:0051301,cell division; GO:0044772,mitotic cell cycle phase transition; GO:0000079,regulation of cyclin-dependent protein serine/threonine kinase activity; GO:0003674,molecular_function; GO:0019207,kinase regulat…	Cyclin, N-terminal domain
Cluster-128409.1	NA	-2.04208	1.67784	K17912 9-cis-beta-carotene 9',10'-cleaving dioxygenase [EC:1.13.11.68] | (RefSeq) carotenoid cleavage dioxygenase 7, chloroplastic (A)	1766	ko00906: Carotenoid biosynthesis; ko01110: Biosynthesis of secondary metabolites	carotenoid cleavage dioxygenase 7, chloroplastic [Asparagus officinalis]	CCD7_ORYSJ RecName: Full=Carotenoid cleavage dioxygenase 7, chloroplastic; Short=OsCCD7; AltName: Full=Beta,beta-carotene 9',10'-oxygenase; EC=1.13.11.68; AltName: Full=Protein DWARF-17; AltName: Full=Protein HIGH-TILLERING DWARF 1; AltName: Full=Protein MAX3 homolog; Flags: Precursor;	A0A075IEG5_CROSA SubName: Full=Carotenoid cleavage dioxygenase 7 {ECO:0000313|EMBL:AIF27228.1}; EC=1.13.11.51 {ECO:0000313|EMBL:AIF27228.1};	Beta, beta-carotene 15,15'-dioxygenase and related enzymes	GO:0009507,chloroplast; GO:0102395,9-cis-beta-carotene 9',10'-cleavage oxygenase activity; GO:0045549,9-cis-epoxycarotenoid dioxygenase activity; GO:0010436,carotenoid dioxygenase activity; GO:0046872,metal ion binding; GO:0016702,oxidoreductase activity, acting on single donors with incorporation of molecular oxygen, incorporation of two atoms of oxygen; GO:0016121,carotene catabolic process; GO…	YjeF-related protein N-terminus
Cluster-43304.0	NA	NA	4.16927	K17912 9-cis-beta-carotene 9',10'-cleaving dioxygenase [EC:1.13.11.68] | (RefSeq) carotenoid cleavage dioxygenase 7, chloroplastic (A)	521	ko00906: Carotenoid biosynthesis; ko01110: Biosynthesis of secondary metabolites	carotenoid cleavage dioxygenase 7 [Crocus sativus]	CCD7_ORYSJ RecName: Full=Carotenoid cleavage dioxygenase 7, chloroplastic; Short=OsCCD7; AltName: Full=Beta,beta-carotene 9',10'-oxygenase; EC=1.13.11.68; AltName: Full=Protein DWARF-17; AltName: Full=Protein HIGH-TILLERING DWARF 1; AltName: Full=Protein MAX3 homolog; Flags: Precursor;	A0A075IEG5_CROSA SubName: Full=Carotenoid cleavage dioxygenase 7 {ECO:0000313|EMBL:AIF27228.1}; EC=1.13.11.51 {ECO:0000313|EMBL:AIF27228.1};	Beta, beta-carotene 15,15'-dioxygenase and related enzymes	GO:0009507,chloroplast; GO:0102395,9-cis-beta-carotene 9',10'-cleavage oxygenase activity; GO:0045549,9-cis-epoxycarotenoid dioxygenase activity; GO:0010436,carotenoid dioxygenase activity; GO:0046872,metal ion binding; GO:0016702,oxidoreductase activity, acting on single donors with incorporation of molecular oxygen, incorporation of two atoms of oxygen; GO:0016121,carotene catabolic process; GO…	Retinal pigment epithelial membrane protein
Cluster-129649.0	NA	9.75622	NA	K17913 carlactone synthase / all-trans-10'-apo-beta-carotenal 13,14-cleaving dioxygenase [EC:1.13.11.69 1.13.11.70] | (RefSeq) carotenoid cleavage dioxygenase 8 homolog B, chloroplastic-like (A)	1600	ko00906: Carotenoid biosynthesis; ko01110: Biosynthesis of secondary metabolites	carotenoid cleavage dioxygenase 8 homolog B, chloroplastic [Elaeis guineensis]	CCD8B_ORYSJ RecName: Full=Carotenoid cleavage dioxygenase 8 homolog B, chloroplastic; Short=OsCCD8b; EC=1.13.11.69 {ECO:0000269|PubMed:22422982}; EC=1.13.11.70 {ECO:0000269|PubMed:18637791}; AltName: Full=Protein DWARF-10; AltName: Full=Protein MAX4 homolog; Flags: Precursor;	A0A6I9RD89_ELAGV SubName: Full=carotenoid cleavage dioxygenase 8 homolog B, chloroplastic {ECO:0000313|RefSeq:XP_010924674.1};	Beta, beta-carotene 15,15'-dioxygenase and related enzymes	GO:0009507,chloroplast; GO:0102396,9-cis-10'-apo-beta-carotenal cleavage oxygenase activity; GO:0102251,all-trans-beta-apo-10'-carotenal cleavage oxygenase activity; GO:0010436,carotenoid dioxygenase activity; GO:0046872,metal ion binding; GO:0016702,oxidoreductase activity, acting on single donors with incorporation of molecular oxygen, incorporation of two atoms of oxygen; GO:0016121,carotene c…	Retinal pigment epithelial membrane protein
Cluster-129649.2	NA	NA	7.83382	K17913 carlactone synthase / all-trans-10'-apo-beta-carotenal 13,14-cleaving dioxygenase [EC:1.13.11.69 1.13.11.70] | (RefSeq) carotenoid cleavage dioxygenase 8 homolog B, chloroplastic-like (A)	1528	ko00906: Carotenoid biosynthesis; ko01110: Biosynthesis of secondary metabolites	carotenoid cleavage dioxygenase 8 homolog B, chloroplastic [Elaeis guineensis]	CCD8B_ORYSJ RecName: Full=Carotenoid cleavage dioxygenase 8 homolog B, chloroplastic; Short=OsCCD8b; EC=1.13.11.69 {ECO:0000269|PubMed:22422982}; EC=1.13.11.70 {ECO:0000269|PubMed:18637791}; AltName: Full=Protein DWARF-10; AltName: Full=Protein MAX4 homolog; Flags: Precursor;	A0A6I9RD89_ELAGV SubName: Full=carotenoid cleavage dioxygenase 8 homolog B, chloroplastic {ECO:0000313|RefSeq:XP_010924674.1};	Beta, beta-carotene 15,15'-dioxygenase and related enzymes	GO:0009507,chloroplast; GO:0102396,9-cis-10'-apo-beta-carotenal cleavage oxygenase activity; GO:0102251,all-trans-beta-apo-10'-carotenal cleavage oxygenase activity; GO:0010436,carotenoid dioxygenase activity; GO:0046872,metal ion binding; GO:0016702,oxidoreductase activity, acting on single donors with incorporation of molecular oxygen, incorporation of two atoms of oxygen; GO:0016121,carotene c…	Retinal pigment epithelial membrane protein
Cluster-129649.4	NA	9.99278	10.6624	K17913 carlactone synthase / all-trans-10'-apo-beta-carotenal 13,14-cleaving dioxygenase [EC:1.13.11.69 1.13.11.70] | (RefSeq) carotenoid cleavage dioxygenase 8 homolog B, chloroplastic-like (A)	1880	ko00906: Carotenoid biosynthesis; ko01110: Biosynthesis of secondary metabolites	carotenoid cleavage dioxygenase 8 homolog B, chloroplastic [Elaeis guineensis]	CCD8B_ORYSJ RecName: Full=Carotenoid cleavage dioxygenase 8 homolog B, chloroplastic; Short=OsCCD8b; EC=1.13.11.69 {ECO:0000269|PubMed:22422982}; EC=1.13.11.70 {ECO:0000269|PubMed:18637791}; AltName: Full=Protein DWARF-10; AltName: Full=Protein MAX4 homolog; Flags: Precursor;	A0A6I9RD89_ELAGV SubName: Full=carotenoid cleavage dioxygenase 8 homolog B, chloroplastic {ECO:0000313|RefSeq:XP_010924674.1};	Beta, beta-carotene 15,15'-dioxygenase and related enzymes	GO:0009507,chloroplast; GO:0102396,9-cis-10'-apo-beta-carotenal cleavage oxygenase activity; GO:0102251,all-trans-beta-apo-10'-carotenal cleavage oxygenase activity; GO:0010436,carotenoid dioxygenase activity; GO:0046872,metal ion binding; GO:0016702,oxidoreductase activity, acting on single donors with incorporation of molecular oxygen, incorporation of two atoms of oxygen; GO:0016121,carotene c…	Retinal pigment epithelial membrane protein
Cluster-44265.0	NA	NA	4.70007	K25201 importin-11 | (RefSeq) importin-11-like (A)	2652	ko03013: Nucleocytoplasmic transport	importin-11 [Quercus suber]	CCD8_ARATH RecName: Full=Carotenoid cleavage dioxygenase 8, chloroplastic; Short=AtCCD8; EC=1.13.11.69 {ECO:0000269|PubMed:22422982}; EC=1.13.11.70 {ECO:0000269|PubMed:18637791}; AltName: Full=AtNCED8; AltName: Full=Protein MORE AXILLARY BRANCHING 4; AltName: Full=Protein MORE AXILLARY GROWTH 4; Flags: Precursor;	A0A2R6WUK0_MARPO RecName: Full=Xpo1 domain-containing protein {ECO:0000259|Pfam:PF08389};	Nuclear transport receptor KAP120 (importin beta superfamily)	GO:0009507,chloroplast; GO:0009570,chloroplast stroma; GO:0102396,9-cis-10'-apo-beta-carotenal cleavage oxygenase activity; GO:0102251,all-trans-beta-apo-10'-carotenal cleavage oxygenase activity; GO:0010436,carotenoid dioxygenase activity; GO:0046872,metal ion binding; GO:0016702,oxidoreductase activity, acting on single donors with incorporation of molecular oxygen, incorporation of two atoms o…	Retinal pigment epithelial membrane protein
Cluster-133144.0	4.07029	3.60876	3.35828	K17911 beta-carotene isomerase [EC:5.2.1.14] | (RefSeq) beta-carotene isomerase D27, chloroplastic (A)	1368	ko00906: Carotenoid biosynthesis; ko01110: Biosynthesis of secondary metabolites	beta-carotene isomerase D27, chloroplastic [Asparagus officinalis]	D27_ORYSJ RecName: Full=Beta-carotene isomerase D27, chloroplastic {ECO:0000305}; EC=5.2.1.14 {ECO:0000269|PubMed:22422982}; AltName: Full=Protein DWARF-27 {ECO:0000303|PubMed:19470589}; Flags: Precursor;	A0A8B8J9I8_PHODC SubName: Full=beta-carotene isomerase D27, chloroplastic-like {ECO:0000313|RefSeq:XP_026663993.1};	--	GO:0009507,chloroplast; GO:0106365,NA; GO:0016859,cis-trans isomerase activity; GO:0005506,iron ion binding; GO:0010223,secondary shoot formation; GO:1901601,strigolactone biosynthetic process; GO:0003674,molecular_function; GO:0003824,catalytic activity; GO:0016853,isomerase activity; GO:0005488,binding; GO:0043167,ion binding; GO:0043169,cation binding; GO:0046872,metal ion binding; GO:0046914,…	Beta-carotene isomerase D27-like, C-terminal
Cluster-46671.3	NA	NA	2.89111	K17911 beta-carotene isomerase [EC:5.2.1.14] | (RefSeq) beta-carotene isomerase D27, chloroplastic-like (A)	1505	ko00906: Carotenoid biosynthesis; ko01110: Biosynthesis of secondary metabolites	beta-carotene isomerase D27, chloroplastic [Asparagus officinalis]	D27_ARATH RecName: Full=Beta-carotene isomerase D27, chloroplastic; EC=5.2.1.14; AltName: Full=Protein DWARF-27 homolog; Short=AtD27; Flags: Precursor;	A0A5P1EBH4_ASPOF RecName: Full=D27-like_C domain-containing protein {ECO:0000259|Pfam:PF13225};	--	GO:0009507,chloroplast; GO:0009536,plastid; GO:0106365,NA; GO:0005506,iron ion binding; GO:0010223,secondary shoot formation; GO:1901601,strigolactone biosynthetic process; GO:0003674,molecular_function; GO:0005488,binding; GO:0043167,ion binding; GO:0043169,cation binding; GO:0046872,metal ion binding; GO:0046914,transition metal ion binding; GO:0001763,morphogenesis of a branching structure; GO…	Beta-carotene isomerase D27-like, C-terminal
Cluster-94283.0	1.13571	-0.540267	-1.24253	K17911 beta-carotene isomerase [EC:5.2.1.14] | (RefSeq) beta-carotene isomerase D27, chloroplastic (A)	3329	ko00906: Carotenoid biosynthesis; ko01110: Biosynthesis of secondary metabolites	beta-carotene isomerase D27, chloroplastic isoform X1 [Asparagus officinalis]	D27_ORYSJ RecName: Full=Beta-carotene isomerase D27, chloroplastic {ECO:0000305}; EC=5.2.1.14 {ECO:0000269|PubMed:22422982}; AltName: Full=Protein DWARF-27 {ECO:0000303|PubMed:19470589}; Flags: Precursor;	A0A5P1FNV0_ASPOF RecName: Full=D27-like_C domain-containing protein {ECO:0000259|Pfam:PF13225};	--	GO:0009507,chloroplast; GO:0106365,NA; GO:0016859,cis-trans isomerase activity; GO:0005506,iron ion binding; GO:0010223,secondary shoot formation; GO:1901601,strigolactone biosynthetic process; GO:0003674,molecular_function; GO:0003824,catalytic activity; GO:0016853,isomerase activity; GO:0005488,binding; GO:0043167,ion binding; GO:0043169,cation binding; GO:0046872,metal ion binding; GO:0046914,…	Beta-carotene isomerase D27-like, C-terminal
