# Supplementary material for: An integrated targeted metabolome of phytohormones and transcriptomics analysis provides insight into the new generation of crops: Polygonatum kingianum var. grandifolium and Polygonatum kingianum
Source: Front Plant Sci. 2024 Sep 24;15:1464731. doi: 10.3389/fpls.2024.1464731 (PMC11458434; doi:10.3389/fpls.2024.1464731)
Supplement: Supplementary file 13 [file Table11.xlsx]

## Sheet: Auxin
Supplementary Table S11 Structural genes selected for the regulatory networks of Auxin, CTK, GA and JA metabolism (1)
geneID	D-bud_vs_X-bud_log2FoldChange	D-rhizome_vs_X-rhizome_log2FoldChange	D-root_vs_X-root_log2FoldChange	KEGG	KEGG pathway	NR	Swissprot	TrEMBL	KOG	GO
Cluster-104449.44	4.71002	4.72167	8.23575	K21604 jasmonoyl-L-amino acid hydrolase [EC:3.5.1.127] | (RefSeq) IAA-amino acid hydrolase ILR1-like 1 (A)	--	IAA-amino acid hydrolase ILR1-like 1 [Asparagus officinalis]	ILL1_ORYSJ RecName: Full=IAA-amino acid hydrolase ILR1-like 1; EC=3.5.1.-; Flags: Precursor;	A0A5P1ETT3_ASPOF RecName: Full=M20_dimer domain-containing protein {ECO:0000259|Pfam:PF07687};	--	GO:0005788,endoplasmic reticulum lumen; GO:0016787,hydrolase activity; GO:0010179,IAA-Ala conjugate hydrolase activity; GO:0009850,auxin metabolic process; GO:0003674,molecular_function; GO:0003824,catalytic activity; GO:0010178,IAA-amino acid conjugate hydrolase activity; GO:0016810,hydrolase activity, acting on carbon-nitrogen (but not peptide) bonds; GO:0008150,biological_process; GO:0008152,m…
Cluster-106117.2	8.97513	8.45377	9.90132	K04567 lysyl-tRNA synthetase, class II [EC:6.1.1.6] | (RefSeq) lysine--tRNA ligase-like isoform X1 (A)	ko00970: Aminoacyl-tRNA biosynthesis	ergosterol biosynthetic protein 28 [Asparagus officinalis]	ERG28_ARATH RecName: Full=Ergosterol biosynthetic protein 28;	A0A8B7CGQ1_PHODC SubName: Full=ergosterol biosynthetic protein 28 {ECO:0000313|RefSeq:XP_008798884.1};	Predicted membrane protein	GO:0005783,endoplasmic reticulum; GO:0005789,endoplasmic reticulum membrane; GO:0016021,integral component of membrane; GO:0030674,protein-macromolecule adaptor activity; GO:2000012,regulation of auxin polar transport; GO:0016126,sterol biosynthetic process; GO:0003674,molecular_function; GO:0060090,molecular adaptor activity; GO:0006810,transport; GO:0008150,biological_process; GO:0009914,hormon…
Cluster-106412.6	7.79045	NA	9.70831	K24345 calcium-binding protein KIC and related proteins | (RefSeq) calcium-binding protein PBP1 (A)	--	calcium-binding protein PBP1 [Asparagus officinalis]	CARP1_ARATH RecName: Full=Calcium-binding protein KRP1 {ECO:0000305}; AltName: Full=KIC-related protein 1 {ECO:0000303|PubMed:14688294};	A0A5P1EPI2_ASPOF RecName: Full=EF-hand domain-containing protein {ECO:0000259|PROSITE:PS50222};	Ca2+-binding protein (centrin/caltractin), EF-Hand superfamily protein	GO:0005509,calcium ion binding; GO:0071456,cellular response to hypoxia; GO:0009733,response to auxin; GO:0003674,molecular_function; GO:0005488,binding; GO:0043167,ion binding; GO:0043169,cation binding; GO:0046872,metal ion binding; GO:0001666,response to hypoxia; GO:0006950,response to stress; GO:0008150,biological_process; GO:0009628,response to abiotic stimulus; GO:0009987,cellular process; …
Cluster-110267.3	5.10535	3.29408	6.82741	K00799 glutathione S-transferase [EC:2.5.1.18] | (RefSeq) probable glutathione S-transferase parA (A)	ko00480: Glutathione metabolism; ko01100: Metabolic pathways	glutathione S-transferase [Dracaena cambodiana]	GSTXA_TOBAC RecName: Full=Probable glutathione S-transferase parA; EC=2.5.1.18; AltName: Full=Auxin-regulated protein parA; AltName: Full=STR246C protein;	A0A173GPJ3_9ASPA RecName: Full=Glutathione transferase {ECO:0000256|ARBA:ARBA00012452}; EC=2.5.1.18 {ECO:0000256|ARBA:ARBA00012452};	Glutathione S-transferase	GO:0005737,cytoplasm; GO:0004364,glutathione transferase activity; GO:0009734,auxin-activated signaling pathway; GO:0006749,glutathione metabolic process; GO:0003674,molecular_function; GO:0003824,catalytic activity; GO:0016740,transferase activity; GO:0016765,transferase activity, transferring alkyl or aryl (other than methyl) groups; GO:0007154,cell communication; GO:0007165,signal transduction…
Cluster-118813.0	6.51906	12.9552	14.2218	K09842 abscisic-aldehyde oxidase [EC:1.2.3.14] | (RefSeq) LOW QUALITY PROTEIN: indole-3-acetaldehyde oxidase-like (A)	ko00906: Carotenoid biosynthesis; ko01100: Metabolic pathways; ko01110: Biosynthesis of secondary metabolites	LOW QUALITY PROTEIN: indole-3-acetaldehyde oxidase-like [Asparagus officinalis]	ALDO2_MAIZE RecName: Full=Indole-3-acetaldehyde oxidase; Short=IAA oxidase; EC=1.2.3.7; AltName: Full=Aldehyde oxidase-2; Short=ZmAO-2;	A0A5P1EXI4_ASPOF SubName: Full=Uncharacterized protein {ECO:0000313|EMBL:ONK68860.1};	Xanthine dehydrogenase	GO:0005737,cytoplasm; GO:0051537,2 iron, 2 sulfur cluster binding; GO:0071949,FAD binding; GO:0050302,indole-3-acetaldehyde oxidase activity; GO:0005506,iron ion binding; GO:0043546,molybdopterin cofactor binding; GO:0016491,oxidoreductase activity; GO:0009688,abscisic acid biosynthetic process; GO:0009851,auxin biosynthetic process; GO:0003674,molecular_function; GO:0005488,binding; GO:0051536,i…
Cluster-123157.1	12.2592	10.7353	12.9949	K14638 solute carrier family 15 (peptide/histidine transporter), member 3/4 | (RefSeq) hypothetical protein (A)	--	protein NRT1/ PTR FAMILY 6.3-like [Phoenix dactylifera]	PTR7_ARATH RecName: Full=Protein NRT1/ PTR FAMILY 6.3; Short=AtNPF6.3; AltName: Full=Nitrate transporter 1.1; Short=AtNRT1; AltName: Full=Nitrate/chlorate transporter; AltName: Full=Protein CHLORINA 1;	A0A8B7CDQ1_PHODC SubName: Full=protein NRT1/ PTR FAMILY 6.3-like {ECO:0000313|RefSeq:XP_008796822.2};	H+/oligopeptide symporter	GO:0016021,integral component of membrane; GO:0005886,plasma membrane; GO:0015112,nitrate transmembrane transporter activity; GO:0015293,symporter activity; GO:0009734,auxin-activated signaling pathway; GO:0010540,basipetal auxin transport; GO:0048527,lateral root development; GO:0042128,nitrate assimilation; GO:0015706,nitrate transport; GO:0006857,oligopeptide transport; GO:0048573,photoperiodi…
Cluster-127365.8	8.7914	10.0203	11.918	K00799 glutathione S-transferase [EC:2.5.1.18] | (RefSeq) probable glutathione S-transferase (A)	ko00480: Glutathione metabolism; ko01100: Metabolic pathways	hypothetical protein BUALT_Bualt18G0037600 [Buddleja alternifolia]	GSTXC_TOBAC RecName: Full=Probable glutathione S-transferase parC; EC=2.5.1.18; AltName: Full=Auxin-regulated protein parC;	A0A3S3MTI5_9MAGN RecName: Full=Glutathione transferase {ECO:0000256|ARBA:ARBA00012452}; EC=2.5.1.18 {ECO:0000256|ARBA:ARBA00012452};	Glutathione S-transferase	GO:0005737,cytoplasm; GO:0004364,glutathione transferase activity; GO:0009734,auxin-activated signaling pathway; GO:0006749,glutathione metabolic process; GO:0003674,molecular_function; GO:0003824,catalytic activity; GO:0016740,transferase activity; GO:0016765,transferase activity, transferring alkyl or aryl (other than methyl) groups; GO:0007154,cell communication; GO:0007165,signal transduction…
Cluster-128750.0	11.0495	11.102	11.9131	K01897 long-chain acyl-CoA synthetase [EC:6.2.1.3] | (RefSeq) long chain acyl-CoA synthetase 4-like (A)	ko00061: Fatty acid biosynthesis; ko00071: Fatty acid degradation; ko01100: Metabolic pathways; ko01212: Fatty acid metabolism; ko04146: Peroxisome	long chain acyl-CoA synthetase 4-like [Asparagus officinalis]	LACS4_ARATH RecName: Full=Long chain acyl-CoA synthetase 4; EC=6.2.1.3;	A0A5P1EVJ8_ASPOF RecName: Full=Long-chain-fatty-acid--CoA ligase {ECO:0000256|ARBA:ARBA00026121, ECO:0000256|RuleBase:RU369030}; EC=6.2.1.3 {ECO:0000256|ARBA:ARBA00026121, ECO:0000256|RuleBase:RU369030};	Long-chain acyl-CoA synthetases (AMP-forming)	GO:0005783,endoplasmic reticulum; GO:0005794,Golgi apparatus; GO:0016020,membrane; GO:0005524,ATP binding; GO:0004467,long-chain fatty acid-CoA ligase activity; GO:0006631,fatty acid metabolic process; GO:0080024,indolebutyric acid metabolic process; GO:0000166,nucleotide binding; GO:0003674,molecular_function; GO:0005488,binding; GO:0017076,purine nucleotide binding; GO:0030554,adenyl nucleotide…
Cluster-133654.6	9.94018	10.1796	10.6603	K24139 auxin efflux carrier family protein | (RefSeq) protein PIN-LIKES 3-like isoform X1 (A)	--	protein PIN-LIKES 3-like isoform X2 [Asparagus officinalis]	PILS1_ARATH RecName: Full=Protein PIN-LIKES 1 {ECO:0000303|PubMed:22504182}; AltName: Full=Auxin efflux carrier-like protein 1 {ECO:0000303|PubMed:22504182};	A0A5P1ERN2_ASPOF SubName: Full=Uncharacterized protein {ECO:0000313|EMBL:ONK68678.1};	Predicted membrane protein	GO:0005789,endoplasmic reticulum membrane; GO:0016021,integral component of membrane; GO:0009734,auxin-activated signaling pathway; GO:0080162,intracellular auxin transport; GO:0007154,cell communication; GO:0007165,signal transduction; GO:0008150,biological_process; GO:0009719,response to endogenous stimulus; GO:0009725,response to hormone; GO:0009733,response to auxin; GO:0009755,hormone-mediat…
Cluster-25082.24	11.0492	12.0866	12.8048	K23025 H+-translocating diphosphatase [EC:7.1.3.1] | (RefSeq) pyrophosphate-energized vacuolar membrane proton pump 1 (A)	--	Pyrophosphate-energized vacuolar membrane proton pump [Vitis vinifera]	AVP1_ARATH RecName: Full=Pyrophosphate-energized vacuolar membrane proton pump 1; EC=7.1.3.1; AltName: Full=Pyrophosphate-energized inorganic pyrophosphatase 1; Short=H(+)-PPase 1; AltName: Full=Vacuolar proton pyrophosphatase 1; AltName: Full=Vacuolar proton pyrophosphatase 3;	A0A438I5M6_VITVI RecName: Full=H(+)-exporting diphosphatase {ECO:0000256|ARBA:ARBA00013242}; EC=7.1.3.1 {ECO:0000256|ARBA:ARBA00013242};	--	GO:0009507,chloroplast; GO:0009941,chloroplast envelope; GO:0010008,endosome membrane; GO:0005576,extracellular region; GO:0005794,Golgi apparatus; GO:0016021,integral component of membrane; GO:0005739,mitochondrion; GO:0000325,plant-type vacuole; GO:0009705,plant-type vacuole membrane; GO:0005886,plasma membrane; GO:0005774,vacuolar membrane; GO:0005773,vacuole; GO:0004427,inorganic diphosphatas…
Cluster-78230.2	7.7869	NA	9.90429	K14488 SAUR family protein | (RefSeq) auxin-induced protein 6B-like (A)	ko04075: Plant hormone signal transduction	uncharacterized protein LOC109828685 [Asparagus officinalis]	SAU78_ARATH RecName: Full=Auxin-responsive protein SAUR78 {ECO:0000305}; AltName: Full=Protein SMALL AUXIN UP RNA 78 {ECO:0000303|PubMed:26207341};	A0A5P1EKW8_ASPOF SubName: Full=Uncharacterized protein {ECO:0000313|EMBL:ONK65231.1};	--	GO:0005737,cytoplasm; GO:0019897,extrinsic component of plasma membrane; GO:0005634,nucleus; GO:0071456,cellular response to hypoxia; GO:0009873,ethylene-activated signaling pathway; GO:0030307,positive regulation of cell growth; GO:0009733,response to auxin; GO:0001666,response to hypoxia; GO:0006950,response to stress; GO:0008150,biological_process; GO:0009628,response to abiotic stimulus; GO:0…
Cluster-82180.1	7.54709	7.49159	9.01034	--	--	tetraspanin-8-like [Asparagus officinalis]	TET8_ARATH RecName: Full=Tetraspanin-8;	A0A5P1FQA5_ASPOF SubName: Full=Uncharacterized protein {ECO:0000313|EMBL:ONK78891.1};	--	GO:0005794,Golgi apparatus; GO:0016021,integral component of membrane; GO:0005886,plasma membrane; GO:0009506,plasmodesma; GO:0005773,vacuole; GO:0009734,auxin-activated signaling pathway; GO:0050829,defense response to Gram-negative bacterium; GO:0007154,cell communication; GO:0007165,signal transduction; GO:0008150,biological_process; GO:0009719,response to endogenous stimulus; GO:0009725,respo…

## Sheet: CTK
Supplementary Table S11 Structural genes selected for the regulatory networks of Auxin, CTK, GA and JA metabolism (2)
geneID	D-bud_vs_X-bud_log2FoldChange	D-rhizome_vs_X-rhizome_log2FoldChange	D-root_vs_X-root_log2FoldChange	KEGG	KEGG pathway	NR	Swissprot	TrEMBL	KOG	GO	Pfam
Cluster-103520.0	NA	NA	8.26772	K14490 histidine-containing phosphotransfer peotein | (RefSeq) histidine-containing phosphotransfer protein 2-like (A)	ko04075: Plant hormone signal transduction	histidine-containing phosphotransfer protein 2-like [Asparagus officinalis]	OHP2_ORYSJ RecName: Full=Histidine-containing phosphotransfer protein 2 {ECO:0000305}; AltName: Full=OsAHP2 {ECO:0000303|PubMed:24578505}; AltName: Full=OsHP1 {ECO:0000312|EMBL:AAQ24029.1}; AltName: Full=OsHpt3 {ECO:0000303|PubMed:16891544};	A0A5P1EYN0_ASPOF RecName: Full=Histidine-containing phosphotransfer protein {ECO:0000256|RuleBase:RU369004};	--	GO:0005737,cytoplasm; GO:0005829,cytosol; GO:0005634,nucleus; GO:0009927,histidine phosphotransfer kinase activity; GO:0043424,protein histidine kinase binding; GO:0009736,cytokinin-activated signaling pathway; GO:0000160,phosphorelay signal transduction system; GO:0016310,phosphorylation; GO:0080038,positive regulation of cytokinin-activated signaling pathway; GO:0003674,molecular_function; GO:0…	--
Cluster-117775.6	11.1679	11.5466	12.358	K09286 EREBP-like factor | (RefSeq) ethylene-responsive transcription factor RAP2-4-like (A)	--	dehydration-responsive element binding protein 3 [Asparagus officinalis]	RAP24_ARATH RecName: Full=Ethylene-responsive transcription factor RAP2-4; AltName: Full=Ethylene-responsive transcription factor ERF059; AltName: Full=Protein RELATED TO APETALA2 4;	Q2VET5_ASPOF SubName: Full=Dehydration-responsive element binding protein 3 {ECO:0000313|EMBL:ABB89754.1};	--	GO:0005634,nucleus; GO:0003677,DNA binding; GO:0003700,DNA-binding transcription factor activity; GO:0043565,sequence-specific DNA binding; GO:0000976,transcription regulatory region sequence-specific DNA binding; GO:0071472,cellular response to salt stress; GO:0009736,cytokinin-activated signaling pathway; GO:0009873,ethylene-activated signaling pathway; GO:0045595,regulation of cell differentia…	--
Cluster-124082.2	1.83424	2.15265	2.09764	K19589 release factor glutamine methyltransferase [EC:2.1.1.297] | (RefSeq) uncharacterized protein LOC100283871 (A)	--	hypothetical protein HPP92_002582 [Vanilla planifolia]	KNAT3_ARATH RecName: Full=Homeobox protein knotted-1-like 3; AltName: Full=Protein KNAT3;	A0A835VMH9_VANPL SubName: Full=Uncharacterized protein {ECO:0000313|EMBL:KAG0502510.1};	Transcription factor MEIS1 and related HOX domain proteins	GO:0005829,cytosol; GO:0005634,nucleus; GO:0003700,DNA-binding transcription factor activity; GO:0000981,DNA-binding transcription factor activity, RNA polymerase II-specific; GO:0000978,RNA polymerase II cis-regulatory region sequence-specific DNA binding; GO:0071345,cellular response to cytokine stimulus; GO:0009722,detection of cytokinin stimulus; GO:0006357,regulation of transcription by RNA …	KNOX2 domain
Cluster-124082.3	10.2451	10.8535	11.4152	K19589 release factor glutamine methyltransferase [EC:2.1.1.297] | (RefSeq) uncharacterized protein LOC100283871 (A)	--	PREDICTED: homeobox protein knotted-1-like 13 isoform X2 [Nelumbo nucifera]	KNAT3_ARATH RecName: Full=Homeobox protein knotted-1-like 3; AltName: Full=Protein KNAT3;	A0A1U7ZAK1_NELNU SubName: Full=homeobox protein knotted-1-like 13 isoform X2 {ECO:0000313|RefSeq:XP_010244782.1};	Transcription factor MEIS1 and related HOX domain proteins	GO:0005829,cytosol; GO:0005634,nucleus; GO:0003700,DNA-binding transcription factor activity; GO:0000981,DNA-binding transcription factor activity, RNA polymerase II-specific; GO:0000978,RNA polymerase II cis-regulatory region sequence-specific DNA binding; GO:0071345,cellular response to cytokine stimulus; GO:0009722,detection of cytokinin stimulus; GO:0006357,regulation of transcription by RNA …	KNOX2 domain
Cluster-98370.0	10.2486	8.40865	11.025	K00279 cytokinin dehydrogenase [EC:1.5.99.12] | (RefSeq) cytokinin dehydrogenase 11-like (A)	ko00908: Zeatin biosynthesis; ko01110: Biosynthesis of secondary metabolites	cytokinin dehydrogenase 11 [Elaeis guineensis]	CKX11_ORYSJ RecName: Full=Cytokinin dehydrogenase 11; EC=1.5.99.12; AltName: Full=Cytokinin oxidase 11; Short=OsCKX11; Flags: Precursor;	A0A6I9QZP0_ELAGV RecName: Full=Cytokinin dehydrogenase {ECO:0000256|ARBA:ARBA00011928}; EC=1.5.99.12 {ECO:0000256|ARBA:ARBA00011928};	Proteins containing the FAD binding domain	GO:0005615,extracellular space; GO:0019139,cytokinin dehydrogenase activity; GO:0071949,FAD binding; GO:0009690,cytokinin metabolic process; GO:0003674,molecular_function; GO:0003824,catalytic activity; GO:0016491,oxidoreductase activity; GO:0016645,oxidoreductase activity, acting on the CH-NH group of donors; GO:0000166,nucleotide binding; GO:0005488,binding; GO:0036094,small molecule binding; G…	Cytokinin dehydrogenase 1, FAD and cytokinin binding

## Sheet: GA
Supplementary Table S11 Structural genes selected for the regulatory networks of Auxin, CTK, GA and JA metabolism (3)
geneID	D-bud_vs_X-bud_log2FoldChange	D-rhizome_vs_X-rhizome_log2FoldChange	D-root_vs_X-root_log2FoldChange	KEGG	KEGG pathway	NR	Swissprot	TrEMBL	KOG	GO	Pfam
Cluster-72515.4	9.17597	10.4766	7.1209	K14493 gibberellin receptor GID1 [EC:3.-.-.-] | (RefSeq) GID1b-1; hypothetical protein (A)	ko04075: Plant hormone signal transduction	probable carboxylesterase 15 isoform X3 [Asparagus officinalis]	CXE15_ARATH RecName: Full=Probable carboxylesterase 15; AltName: Full=AtCXE15; EC=3.1.1.1;	A0A6I9QEZ2_ELAGV SubName: Full=probable carboxylesterase 15 {ECO:0000313|RefSeq:XP_010908310.1};	Arylacetamide deacetylase	GO:0080030,methyl indole-3-acetate esterase activity; GO:0003674,molecular_function; GO:0003824,catalytic activity; GO:0016787,hydrolase activity; GO:0016788,hydrolase activity, acting on ester bonds; GO:0052689,carboxylic ester hydrolase activity	Protein of unknown function (DUF2647)
Cluster-74217.0	5.74771	9.22338	8.35756	K14493 gibberellin receptor GID1 [EC:3.-.-.-] | (RefSeq) gibberellin receptor GID1C-like isoform X2 (A)	ko04075: Plant hormone signal transduction	probable carboxylesterase 15 [Asparagus officinalis]	CXE15_ARATH RecName: Full=Probable carboxylesterase 15; AltName: Full=AtCXE15; EC=3.1.1.1;	A0A8K0ICY9_COCNU SubName: Full=Putative carboxylesterase 15 {ECO:0000313|EMBL:KAG1347966.1};	Arylacetamide deacetylase	GO:0080030,methyl indole-3-acetate esterase activity; GO:0003674,molecular_function; GO:0003824,catalytic activity; GO:0016787,hydrolase activity; GO:0016788,hydrolase activity, acting on ester bonds; GO:0052689,carboxylic ester hydrolase activity	alpha/beta hydrolase fold
Cluster-72783.0	12.1784	10.6974	13.7167	K04125 gibberellin 2beta-dioxygenase [EC:1.14.11.13] | (RefSeq) gibberellin 2-beta-dioxygenase 1 (A)	ko00904: Diterpenoid biosynthesis; ko01110: Biosynthesis of secondary metabolites	2-oxoglutarate-dependent dioxygenase AOP2-like [Asparagus officinalis]	2ODD_SINHE RecName: Full=Deoxypodophyllotoxin synthase {ECO:0000303|PubMed:26359402}; EC=1.14.20.8 {ECO:0000269|PubMed:26359402}; AltName: Full=2-oxoglutarate dependent dioxygenase {ECO:0000303|PubMed:26359402};	A0A5P1FMW2_ASPOF SubName: Full=Uncharacterized protein {ECO:0000313|EMBL:ONK79394.1};	Iron/ascorbate family oxidoreductases	GO:0016706,2-oxoglutarate-dependent dioxygenase activity; GO:0046872,metal ion binding; GO:0019438,aromatic compound biosynthetic process; GO:0009699,phenylpropanoid biosynthetic process; GO:0009611,response to wounding; GO:0003674,molecular_function; GO:0003824,catalytic activity; GO:0016491,oxidoreductase activity; GO:0016705,oxidoreductase activity, acting on paired donors, with incorporation …	2OG-Fe(II) oxygenase superfamily
Cluster-43519.12	4.35667	NA	6.1881	K04122 ent-kaurene oxidase [EC:1.14.14.86] | (RefSeq) LOW QUALITY PROTEIN: ent-kaurene oxidase 2 (A)	ko00904: Diterpenoid biosynthesis; ko01100: Metabolic pathways; ko01110: Biosynthesis of secondary metabolites	uncharacterized protein A4U43_C08F4670 [Asparagus officinalis]	C7017_ORYSJ RecName: Full=Ent-kaurene oxidase-like protein 1 {ECO:0000303|PubMed:15316288}; Short=OsKOL1 {ECO:0000303|PubMed:15316288}; AltName: Full=Cytochrome P450 701A7 {ECO:0000305};	A0A835V7Q6_VANPL SubName: Full=Uncharacterized protein {ECO:0000313|EMBL:KAG0490584.1};	Cytochrome P450 CYP2 subfamily	GO:0009707,chloroplast outer membrane; GO:0016021,integral component of membrane; GO:0052615,ent-kaurene oxidase activity; GO:0020037,heme binding; GO:0005506,iron ion binding; GO:0016709,oxidoreductase activity, acting on paired donors, with incorporation or reduction of molecular oxygen, NAD(P)H as one donor, and incorporation of one atom of oxygen; GO:0010241,ent-kaurene oxidation to kaurenoic…	Cytochrome P450
Cluster-43519.6	4.08971	3.81277	5.07957	K04122 ent-kaurene oxidase [EC:1.14.14.86] | (RefSeq) LOW QUALITY PROTEIN: ent-kaurene oxidase 2 (A)	ko00904: Diterpenoid biosynthesis; ko01100: Metabolic pathways; ko01110: Biosynthesis of secondary metabolites	LOW QUALITY PROTEIN: ent-kaurene oxidase 2 [Asparagus officinalis]	C7016_ORYSJ RecName: Full=Ent-kaurene oxidase 2 {ECO:0000303|PubMed:15075394}; Short=OsKO2 {ECO:0000303|PubMed:15075394}; EC=1.14.14.86 {ECO:0000269|PubMed:22247270, ECO:0000269|PubMed:22487175}; AltName: Full=Cytochrome P450 701A6 {ECO:0000303|PubMed:22247270}; AltName: Full=Ent-kaurene oxidase-like 2 {ECO:0000303|PubMed:15316288}; Short=OsKOL2 {ECO:0000303|PubMed:15316288}; AltName: Full=OsKOS3…	A0A2I0AP13_9ASPA SubName: Full=Ent-kaurene oxidase, chloroplastic {ECO:0000313|EMBL:PKA57273.1}; EC=1.14.13.78 {ECO:0000313|EMBL:PKA57273.1};	Cytochrome P450 CYP2 subfamily	GO:0009707,chloroplast outer membrane; GO:0016021,integral component of membrane; GO:0052617,ent-kaur-16-en-19-al oxidase activity; GO:0052616,ent-kaur-16-en-19-ol oxidase activity; GO:0052615,ent-kaurene oxidase activity; GO:0020037,heme binding; GO:0005506,iron ion binding; GO:0016709,oxidoreductase activity, acting on paired donors, with incorporation or reduction of molecular oxygen, NAD(P)H …	Cytochrome P450
Cluster-112642.1	0.201133	-0.485788	1.31246	K04123 ent-kaurenoic acid monooxygenase [EC:1.14.14.107] | (RefSeq) ent-kaurenoic acid oxidase-like isoform X1 (A)	ko00904: Diterpenoid biosynthesis; ko01100: Metabolic pathways; ko01110: Biosynthesis of secondary metabolites	ent-kaurenoic acid oxidase-like isoform X1 [Asparagus officinalis]	KAO_ORYSJ RecName: Full=Ent-kaurenoic acid oxidase {ECO:0000305}; Short=OsKAO {ECO:0000303|PubMed:15075394}; EC=1.14.14.107 {ECO:0000250|UniProtKB:O23051}; AltName: Full=Cytochrome P450 88A5 {ECO:0000305}; AltName: Full=Protein REDUCED POLLEN ELONGATION 1 {ECO:0000303|PubMed:18083909};	A0A6I9SDD0_ELAGV SubName: Full=ent-kaurenoic acid oxidase {ECO:0000313|RefSeq:XP_010941218.1};	Cytochrome P450 CYP4/CYP19/CYP26 subfamilies	GO:0005783,endoplasmic reticulum; GO:0005789,endoplasmic reticulum membrane; GO:0016021,integral component of membrane; GO:0051777,ent-kaurenoate oxidase activity; GO:0020037,heme binding; GO:0005506,iron ion binding; GO:0004497,monooxygenase activity; GO:0016491,oxidoreductase activity; GO:0016132,brassinosteroid biosynthetic process; GO:0010268,brassinosteroid homeostasis; GO:0009686,gibberelli…	Cytochrome P450
Cluster-114222.4	5.48123	8.79976	7.30465	K13070 momilactone-A synthase [EC:1.1.1.295] | (RefSeq) momilactone A synthase (A)	ko00904: Diterpenoid biosynthesis; ko01110: Biosynthesis of secondary metabolites	KR domain [Musa troglodytarum]	MOMAS_ORYSJ RecName: Full=Momilactone A synthase; Short=OsMAS; EC=1.1.1.295;	A0A804K413_MUSAM SubName: Full=(wild Malaysian banana) hypothetical protein {ECO:0000313|EMBL:CAG1830871.1};	Reductases with broad range of substrate specificities	GO:0102960,momilactone-A synthase activity; GO:0003674,molecular_function; GO:0003824,catalytic activity; GO:0016491,oxidoreductase activity; GO:0016614,oxidoreductase activity, acting on CH-OH group of donors; GO:0016616,oxidoreductase activity, acting on the CH-OH group of donors, NAD or NADP as acceptor	Enoyl-(Acyl carrier protein) reductase

## Sheet: JA
Supplementary Table S11 Structural genes selected for the regulatory networks of Auxin, CTK, GA and JA metabolism (4)
geneID	D-bud_vs_X-bud_log2FoldChange	D-rhizome_vs_X-rhizome_log2FoldChange	D-root_vs_X-root_log2FoldChange	KEGG	KEGG pathway	NR	Swissprot	TrEMBL	KOG	GO	Pfam
Cluster-103094.0	9.98597	9.99152	12	K13464 jasmonate ZIM domain-containing protein | (RefSeq) protein TIFY 3-like (A)	ko04075: Plant hormone signal transduction	protein TIFY 3-like [Asparagus officinalis]	TIF3_ORYSJ RecName: Full=Protein TIFY 3 {ECO:0000305}; Short=OsTIFY3 {ECO:0000303|PubMed:19618278}; AltName: Full=Jasmonate ZIM domain-containing protein 1 {ECO:0000305}; Short=OsJAZ1 {ECO:0000303|PubMed:19618278}; AltName: Full=OsJAZ10 {ECO:0000303|PubMed:23320078}; AltName: Full=Protein EXTRA GLUME 2 {ECO:0000303|PubMed:24647160};	D6MKJ9_9ASPA SubName: Full=Transcription factor {ECO:0000313|EMBL:ADG58046.1};	--	GO:0005634,nucleus; GO:0010582,floral meristem determinacy; GO:0048449,floral organ formation; GO:0031347,regulation of defense response; GO:2000022,regulation of jasmonic acid mediated signaling pathway; GO:0009611,response to wounding; GO:0000003,reproduction; GO:0003006,developmental process involved in reproduction; GO:0007275,multicellular organism development; GO:0008150,biological_process;…	Jas motif
Cluster-124125.15	2.49679	5.38125	1.09207	K24028 salicylic acid 3-hydroxylase [EC:1.14.11.-] | (RefSeq) 2-oxoacid-dependent dioxygenase (A)	--	flavonol synthase/flavanone 3-hydroxylase-like [Asparagus officinalis]	JOX2_ARATH RecName: Full=Jasmonate-induced oxygenase 2 {ECO:0000303|PubMed:28559313}; EC=1.14.11.- {ECO:0000269|PubMed:28559313, ECO:0000269|PubMed:28760569, ECO:0000269|PubMed:33516967}; AltName: Full=2-oxoglutarate-dependent dioxygenase JOX2 {ECO:0000305}; AltName: Full=Jasmonic acid oxidase 2 {ECO:0000303|PubMed:28760569};	A0A5P1FCB0_ASPOF RecName: Full=Fe2OG dioxygenase domain-containing protein {ECO:0000259|PROSITE:PS51471};	Iron/ascorbate family oxidoreductases	GO:0005829,cytosol; GO:0051213,dioxygenase activity; GO:0005506,iron ion binding; GO:0120091,jasmonic acid hydrolase; GO:0097237,cellular response to toxic substance; GO:0006952,defense response; GO:1900366,negative regulation of defense response to insect; GO:1900150,regulation of defense response to fungus; GO:2000022,regulation of jasmonic acid mediated signaling pathway; GO:0003674,molecular_…	2OG-Fe(II) oxygenase superfamily
Cluster-127170.5	9.16264	8.78263	9.89912	K21485 anthranilate O-methyltransferase [EC:2.1.1.277] | (RefSeq) anthranilate O-methyltransferase 1 (A)	--	anthranilate O-methyltransferase 1 [Elaeis guineensis]	JMT2_THECC RecName: Full=Probable jasmonic acid carboxyl methyltransferase 2 {ECO:0000312|EMBL:EOY14825.1}; EC=2.1.1.141 {ECO:0000250|UniProtKB:Q9AR07};	A0A6I9QL01_ELAGV SubName: Full=anthranilate O-methyltransferase 1 {ECO:0000313|RefSeq:XP_010910064.1};	--	GO:0005737,cytoplasm; GO:0005634,nucleus; GO:0046872,metal ion binding; GO:0030795,methyl jasmonate methylesterase activity; GO:0008757,S-adenosylmethionine-dependent methyltransferase activity; GO:0032259,methylation; GO:0031408,oxylipin biosynthetic process; GO:0003674,molecular_function; GO:0005488,binding; GO:0043167,ion binding; GO:0043169,cation binding; GO:0003824,catalytic activity; GO:00…	SAM dependent carboxyl methyltransferase
Cluster-22029.1	5.98677	6.38235	7.41861	--	--	60 kDa jasmonate-induced protein [Elaeis guineensis]	RIP_DRIMA RecName: Full=Ribosome-inactivating protein charybdin; EC=3.2.2.22; AltName: Full=rRNA N-glycosidase;	A0A6I9SGI2_ELAGV SubName: Full=60 kDa jasmonate-induced protein {ECO:0000313|RefSeq:XP_010942712.2};	--	GO:0030598,rRNA N-glycosylase activity; GO:0090729,toxin activity; GO:0006952,defense response; GO:0017148,negative regulation of translation; GO:0003674,molecular_function; GO:0003824,catalytic activity; GO:0016787,hydrolase activity; GO:0016798,hydrolase activity, acting on glycosyl bonds; GO:0016799,hydrolase activity, hydrolyzing N-glycosyl compounds; GO:0030597,RNA glycosylase activity; GO:0…	Ribosome inactivating protein
Cluster-26158.3	13.2868	12.5337	15.4034	K17302 coatomer subunit beta' | (RefSeq) receptor-like cytoplasmic kinase 185 isoform X1 (A)	--	hypothetical protein LOK49_LG05G02555 [Camellia lanceoleosa]	JI23_HORVU RecName: Full=23 kDa jasmonate-induced protein;	A0A6P3ZM74_ZIZJJ SubName: Full=23 kDa jasmonate-induced protein-like isoform X2 {ECO:0000313|RefSeq:XP_015880186.1};	--	--	--
Cluster-67629.11	2.87267	NA	8.54489	K13464 jasmonate ZIM domain-containing protein | (RefSeq) protein TIFY 10a (A)	ko04075: Plant hormone signal transduction	Protein TIFY 10a [Cocos nucifera]	TI10B_ORYSI RecName: Full=Protein TIFY 10b {ECO:0000305};	A0A8K0IU46_COCNU SubName: Full=Protein TIFY 10a {ECO:0000313|EMBL:KAG1366399.1};	--	GO:0005634,nucleus; GO:0005575,cellular_component; GO:0005622,intracellular anatomical structure; GO:0043226,organelle; GO:0043227,membrane-bounded organelle; GO:0043229,intracellular organelle; GO:0043231,intracellular membrane-bounded organelle; GO:0110165,cellular anatomical entity	tify domain
Cluster-67629.12	9.21455	7.25619	10.1401	K13464 jasmonate ZIM domain-containing protein | (RefSeq) protein TIFY 10a (A)	ko04075: Plant hormone signal transduction	Protein TIFY 10a [Cocos nucifera]	TI10B_ORYSI RecName: Full=Protein TIFY 10b {ECO:0000305};	A0A8K0IU46_COCNU SubName: Full=Protein TIFY 10a {ECO:0000313|EMBL:KAG1366399.1};	--	GO:0005634,nucleus; GO:0005575,cellular_component; GO:0005622,intracellular anatomical structure; GO:0043226,organelle; GO:0043227,membrane-bounded organelle; GO:0043229,intracellular organelle; GO:0043231,intracellular membrane-bounded organelle; GO:0110165,cellular anatomical entity	tify domain
Cluster-67629.4	8.11795	8.37466	11.7608	K13464 jasmonate ZIM domain-containing protein | (RefSeq) protein TIFY 10a (A)	ko04075: Plant hormone signal transduction	Protein TIFY 10a [Cocos nucifera]	TI10B_ORYSJ RecName: Full=Protein TIFY 10b {ECO:0000305}; Short=OsTIFY10b {ECO:0000303|PubMed:19618278}; AltName: Full=Jasmonate ZIM domain-containing protein 7 {ECO:0000305}; Short=OsJAZ7 {ECO:0000303|PubMed:19618278}; AltName: Full=OsJAZ6 {ECO:0000303|PubMed:21332845};	A0A6I9S5B0_ELAGV SubName: Full=protein TIFY 10a {ECO:0000313|RefSeq:XP_010937308.1};	--	GO:0005634,nucleus; GO:0031347,regulation of defense response; GO:2000022,regulation of jasmonic acid mediated signaling pathway; GO:0009611,response to wounding; GO:0006950,response to stress; GO:0006952,defense response; GO:0008150,biological_process; GO:0048583,regulation of response to stimulus; GO:0050789,regulation of biological process; GO:0050896,response to stimulus; GO:0065007,biologica…	Jas motif
Cluster-90404.0	NA	NA	2.49489	K08241 jasmonate O-methyltransferase [EC:2.1.1.141] | (RefSeq) jasmonate O-methyltransferase-like (A)	ko00592: alpha-Linolenic acid metabolism; ko01110: Biosynthesis of secondary metabolites	jasmonate O-methyltransferase-like [Asparagus officinalis]	JMT2_THECC RecName: Full=Probable jasmonic acid carboxyl methyltransferase 2 {ECO:0000312|EMBL:EOY14825.1}; EC=2.1.1.141 {ECO:0000250|UniProtKB:Q9AR07};	A0A5P1F1A1_ASPOF SubName: Full=Uncharacterized protein {ECO:0000313|EMBL:ONK72146.1};	--	GO:0005737,cytoplasm; GO:0005634,nucleus; GO:0046872,metal ion binding; GO:0030795,methyl jasmonate methylesterase activity; GO:0008757,S-adenosylmethionine-dependent methyltransferase activity; GO:0032259,methylation; GO:0031408,oxylipin biosynthetic process; GO:0003674,molecular_function; GO:0005488,binding; GO:0043167,ion binding; GO:0043169,cation binding; GO:0003824,catalytic activity; GO:00…	SAM dependent carboxyl methyltransferase
