# Supplementary material for: An integrated targeted metabolome of phytohormones and transcriptomics analysis provides insight into the new generation of crops: Polygonatum kingianum var. grandifolium and Polygonatum kingianum
Source: Front Plant Sci. 2024 Sep 24;15:1464731. doi: 10.3389/fpls.2024.1464731 (PMC11458434; doi:10.3389/fpls.2024.1464731)
Supplement: Supplementary file 14 [file Table12.xlsx]

## Sheet: Auxin
Supplementary Table S12 TFs in the regulatory networks of Auxin, CTK, GA and JA metabolism (1)
Gene ID	TF family	D-bud_vs_X-bud_log2FoldChange	D-rhizome_vs_X-rhizome_log2FoldChange	D-root_vs_X-root_log2FoldChange
Cluster-100863.5	B3-ARF	12.5994	11.3499	13.2431
Cluster-115992.2	AP2/ERF-ERF	9.93011	9.41267	10.1029
Cluster-118569.3	AP2/ERF-ERF	8.90409	9.22809	12.1065
Cluster-124279.8	AP2/ERF-ERF	0.852204	7.63366	6.25563
Cluster-124496.2	AP2/ERF-ERF	8.16798	11.1037	10.12
Cluster-124496.4	AP2/ERF-ERF	1.27129	6.03364	3.2416
Cluster-128076.119	AP2/ERF-ERF	7.76721	8.27104	10.9222
Cluster-129003.0	AP2/ERF-ERF	8.51175	7.66534	10.3623
Cluster-129003.5	AP2/ERF-ERF	8.81806	8.33043	10.0097
Cluster-133010.2	AP2/ERF-ERF	10.4665	8.78886	13.143
Cluster-111324.2	AP2/ERF-ERF	NA	1.92021	0.670801
Cluster-131025.2	AUX/IAA	2.45423	1.71279	2.39726
Cluster-112022.4	B3	7.59933	5.03024	4.80366
Cluster-118536.1	BES1	11.1072	10.3142	12.3148
Cluster-125434.2	bHLH	1.55188	2.0382	2.8357
Cluster-128779.8	bZIP	9.28851	10.2626	11.4749
Cluster-91114.2	bZIP	9.48672	8.88343	10.313
Cluster-80318.0	bZIP	NA	1.53615	1.0774
Cluster-36955.1	C2C2-Dof	7.1918	7.23811	8.2683
Cluster-83449.3	C2C2-Dof	5.09136	4.15215	3.16854
Cluster-27239.1	C2C2-GATA	8.48732	8.19266	11.1371
Cluster-65828.4	C2C2-GATA	8.74594	8.67288	4.6938
Cluster-77481.5	C2H2	7.67464	9.4079	12.1715
Cluster-77481.8	C2H2	NA	7.56592	10.2565
Cluster-27501.3	C3H	8.68	11.446	12.8546
Cluster-27501.7	C3H	6.47551	10.6503	7.18658
Cluster-49855.2	C3H	NA	7.32032	9.21099
Cluster-80152.0	FAR1	1.85385	1.85215	1.86928
Cluster-130982.5	GARP-G2-like	8.70027	9.78875	12.0759
Cluster-110113.1	GRAS	3.25958	7.47419	7.24236
Cluster-55469.9	GRAS	6.48406	10.9105	5.01585
Cluster-92252.6	GRAS	12.8041	13.4982	10.8049
Cluster-127803.2	HB-BELL	0.768108	1.43379	-0.83778
Cluster-124082.2	HB-KNOX	1.83424	2.15265	2.09764
Cluster-124082.3	HB-KNOX	10.2451	10.8535	11.4152
Cluster-82224.2	HB-KNOX	NA	10.4436	0.786892
Cluster-17119.7	HB-other	3.67158	5.07461	4.315
Cluster-112832.2	HSF	8.51211	9.3283	10.3119
Cluster-104950.1	LOB	8.47751	7.70388	9.46992
Cluster-120078.2	LOB	10.1965	10.3328	11.8294
Cluster-132601.3	MADS-MIKC	4.84828	NA	0.520193
Cluster-46854.4	MYB-related	9.45061	9.04493	10.8977
Cluster-46854.8	MYB-related	10.3414	9.63508	11.8278
Cluster-118864.14	NAC	8.38726	5.78196	5.57792
Cluster-120346.3	NAC	-0.744606	2.75955	2.98723
Cluster-125054.4	NAC	4.2852	8.17864	5.67263
Cluster-71302.8	NAC	NA	NA	3.10267
Cluster-80672.0	NAC	4.43768	9.27596	6.27251
Cluster-123230.3	NF-YA	-2.15572	-0.127922	0.644467
Cluster-103094.0	Others	9.98597	9.99152	12
Cluster-103094.5	Tify	0.54249	0.381978	2.09254
Cluster-67629.11	Tify	2.87267	NA	8.54489
Cluster-67629.12	Tify	9.21455	7.25619	10.1401
Cluster-67629.14	Tify	6.90373	NA	7.68365
Cluster-67629.4	Tify	8.11795	8.37466	11.7608
Cluster-104363.5	WRKY	0.545601	1.75647	2.43914
Cluster-117034.0	WRKY	11.8941	11.7024	13.2775
Cluster-11740.103	WRKY	8.14267	9.75095	12.3366
Cluster-123171.1	WRKY	10.003	9.81614	11.9224
Cluster-133336.9	WRKY	9.06382	8.77	11.596
Cluster-15352.2	WRKY	8.47543	8.91037	10.1464
Cluster-26806.7	WRKY	5.4504	8.48079	9.63143

## Sheet: CTK
Supplementary Table S12 TFs in the regulatory networks of Auxin, CTK, GA and JA metabolism (2)
Gene ID	TF family	D-bud_vs_X-bud_log2FoldChange	D-rhizome_vs_X-rhizome_log2FoldChange	D-root_vs_X-root_log2FoldChange
Cluster-100863.5	B3-ARF	12.5994	11.3499	13.2431
Cluster-115992.2	AP2/ERF-ERF	9.93011	9.41267	10.1029
Cluster-118569.3	AP2/ERF-ERF	8.90409	9.22809	12.1065
Cluster-124279.8	AP2/ERF-ERF	0.852204	7.63366	6.25563
Cluster-124496.2	AP2/ERF-ERF	8.16798	11.1037	10.12
Cluster-124496.4	AP2/ERF-ERF	1.27129	6.03364	3.2416
Cluster-128076.119	AP2/ERF-ERF	7.76721	8.27104	10.9222
Cluster-129003.0	AP2/ERF-ERF	8.51175	7.66534	10.3623
Cluster-129003.5	AP2/ERF-ERF	8.81806	8.33043	10.0097
Cluster-133010.2	AP2/ERF-ERF	10.4665	8.78886	13.143
Cluster-111324.2	AP2/ERF-ERF	NA	1.92021	0.670801
Cluster-131025.2	AUX/IAA	2.45423	1.71279	2.39726
Cluster-112022.4	B3	7.59933	5.03024	4.80366
Cluster-118536.1	BES1	11.1072	10.3142	12.3148
Cluster-125434.2	bHLH	1.55188	2.0382	2.8357
Cluster-128779.8	bZIP	9.28851	10.2626	11.4749
Cluster-80318.0	bZIP	NA	1.53615	1.0774
Cluster-91114.2	bZIP	9.48672	8.88343	10.313
Cluster-36955.1	C2C2-Dof	7.1918	7.23811	8.2683
Cluster-83449.3	C2C2-Dof	5.09136	4.15215	3.16854
Cluster-27239.1	C2C2-GATA	8.48732	8.19266	11.1371
Cluster-65828.4	C2C2-GATA	8.74594	8.67288	4.6938
Cluster-77481.5	C2H2	7.67464	9.4079	12.1715
Cluster-77481.8	C2H2	NA	7.56592	10.2565
Cluster-27501.3	C3H	8.68	11.446	12.8546
Cluster-27501.7	C3H	6.47551	10.6503	7.18658
Cluster-49855.2	C3H	NA	7.32032	9.21099
Cluster-80152.0	FAR1	1.85385	1.85215	1.86928
Cluster-130982.5	GARP-G2-like	8.70027	9.78875	12.0759
Cluster-110113.1	GRAS	3.25958	7.47419	7.24236
Cluster-55469.9	GRAS	6.48406	10.9105	5.01585
Cluster-92252.6	GRAS	12.8041	13.4982	10.8049
Cluster-82224.2	HB-KNOX	NA	10.4436	0.786892
Cluster-17119.7	HB-other	3.67158	5.07461	4.315
Cluster-112832.2	HSF	8.51211	9.3283	10.3119
Cluster-104950.1	LOB	8.47751	7.70388	9.46992
Cluster-120078.2	LOB	10.1965	10.3328	11.8294
Cluster-46854.4	MYB-related	9.45061	9.04493	10.8977
Cluster-46854.8	MYB-related	10.3414	9.63508	11.8278
Cluster-118864.14	NAC	8.38726	5.78196	5.57792
Cluster-120346.3	NAC	-0.744606	2.75955	2.98723
Cluster-125054.4	NAC	4.2852	8.17864	5.67263
Cluster-71302.8	NAC	NA	NA	3.10267
Cluster-80672.0	NAC	4.43768	9.27596	6.27251
Cluster-123230.3	NF-YA	-2.15572	-0.127922	0.644467
Cluster-103094.0	Others	9.98597	9.99152	12
Cluster-103094.5	Tify	0.54249	0.381978	2.09254
Cluster-67629.11	Tify	2.87267	NA	8.54489
Cluster-67629.12	Tify	9.21455	7.25619	10.1401
Cluster-67629.14	Tify	6.90373	NA	7.68365
Cluster-67629.4	Tify	8.11795	8.37466	11.7608
Cluster-104363.5	WRKY	0.545601	1.75647	2.43914
Cluster-117034.0	WRKY	11.8941	11.7024	13.2775
Cluster-11740.103	WRKY	8.14267	9.75095	12.3366
Cluster-123171.1	WRKY	10.003	9.81614	11.9224
Cluster-133336.9	WRKY	9.06382	8.77	11.596
Cluster-15352.2	WRKY	8.47543	8.91037	10.1464
Cluster-26806.7	WRKY	5.4504	8.48079	9.63143

## Sheet: GA
Supplementary Table S12 TFs in the regulatory networks of Auxin, CTK, GA and JA metabolism (3)
Gene ID	TF family	D-bud_vs_X-bud_log2FoldChange	D-rhizome_vs_X-rhizome_log2FoldChange	D-root_vs_X-root_log2FoldChange
Cluster-115992.2	AP2/ERF-ERF	9.93011	9.41267	10.1029
Cluster-118569.3	AP2/ERF-ERF	8.90409	9.22809	12.1065
Cluster-124496.2	AP2/ERF-ERF	8.16798	11.1037	10.12
Cluster-124496.4	AP2/ERF-ERF	1.27129	6.03364	3.2416
Cluster-128076.119	AP2/ERF-ERF	7.76721	8.27104	10.9222
Cluster-129003.0	AP2/ERF-ERF	8.51175	7.66534	10.3623
Cluster-129003.5	AP2/ERF-ERF	8.81806	8.33043	10.0097
Cluster-133010.2	AP2/ERF-ERF	10.4665	8.78886	13.143
Cluster-124279.8	AP2/ERF-ERF	0.852204	7.63366	6.25563
Cluster-111324.2	AP2/ERF-ERF	NA	1.92021	0.670801
Cluster-131025.2	AUX/IAA	2.45423	1.71279	2.39726
Cluster-112022.4	B3	7.59933	5.03024	4.80366
Cluster-100863.5	B3-ARF	12.5994	11.3499	13.2431
Cluster-118536.1	BES1	11.1072	10.3142	12.3148
Cluster-125434.2	bHLH	1.55188	2.0382	2.8357
Cluster-128779.8	bZIP	9.28851	10.2626	11.4749
Cluster-80318.0	bZIP	NA	1.53615	1.0774
Cluster-91114.2	bZIP	9.48672	8.88343	10.313
Cluster-36955.1	C2C2-Dof	7.1918	7.23811	8.2683
Cluster-83449.3	C2C2-Dof	5.09136	4.15215	3.16854
Cluster-27239.1	C2C2-GATA	8.48732	8.19266	11.1371
Cluster-65828.4	C2C2-GATA	8.74594	8.67288	4.6938
Cluster-77481.5	C2H2	7.67464	9.4079	12.1715
Cluster-77481.8	C2H2	NA	7.56592	10.2565
Cluster-27501.3	C3H	8.68	11.446	12.8546
Cluster-27501.7	C3H	6.47551	10.6503	7.18658
Cluster-49855.2	C3H	NA	7.32032	9.21099
Cluster-80152.0	FAR1	1.85385	1.85215	1.86928
Cluster-130982.5	GARP-G2-like	8.70027	9.78875	12.0759
Cluster-110113.1	GRAS	3.25958	7.47419	7.24236
Cluster-55469.9	GRAS	6.48406	10.9105	5.01585
Cluster-92252.6	GRAS	12.8041	13.4982	10.8049
Cluster-127803.2	HB-BELL	0.768108	1.43379	-0.83778
Cluster-124082.2	HB-KNOX	1.83424	2.15265	2.09764
Cluster-124082.3	HB-KNOX	10.2451	10.8535	11.4152
Cluster-82224.2	HB-KNOX	NA	10.4436	0.786892
Cluster-17119.7	HB-other	3.67158	5.07461	4.315
Cluster-112832.2	HSF	8.51211	9.3283	10.3119
Cluster-120078.2	LOB	10.1965	10.3328	11.8294
Cluster-104950.1	LOB	8.47751	7.70388	9.46992
Cluster-132601.3	MADS-MIKC	4.84828	NA	0.520193
Cluster-46854.4	MYB-related	9.45061	9.04493	10.8977
Cluster-46854.8	MYB-related	10.3414	9.63508	11.8278
Cluster-118864.14	NAC	8.38726	5.78196	5.57792
Cluster-120346.3	NAC	-0.744606	2.75955	2.98723
Cluster-125054.4	NAC	4.2852	8.17864	5.67263
Cluster-71302.8	NAC	NA	NA	3.10267
Cluster-80672.0	NAC	4.43768	9.27596	6.27251
Cluster-123230.3	NF-YA	-2.15572	-0.127922	0.644467
Cluster-103094.0	Others	9.98597	9.99152	12
Cluster-103094.5	Tify	0.54249	0.381978	2.09254
Cluster-67629.4	Tify	8.11795	8.37466	11.7608
Cluster-67629.11	Tify	2.87267	NA	8.54489
Cluster-67629.12	Tify	9.21455	7.25619	10.1401
Cluster-67629.14	Tify	6.90373	NA	7.68365
Cluster-104363.5	WRKY	0.545601	1.75647	2.43914
Cluster-117034.0	WRKY	11.8941	11.7024	13.2775
Cluster-11740.103	WRKY	8.14267	9.75095	12.3366
Cluster-123171.1	WRKY	10.003	9.81614	11.9224
Cluster-15352.2	WRKY	8.47543	8.91037	10.1464
Cluster-26806.7	WRKY	5.4504	8.48079	9.63143
Cluster-133336.9	WRKY	9.06382	8.77	11.596

## Sheet: JA
Supplementary Table S12 TFs in the regulatory networks of Auxin, CTK, GA and JA metabolism (4)
Gene ID	TF family	D-bud_vs_X-bud_log2FoldChange	D-rhizome_vs_X-rhizome_log2FoldChange	D-root_vs_X-root_log2FoldChange
Cluster-100863.5	B3-ARF	12.5994	11.3499	13.2431
Cluster-115992.2	AP2/ERF-ERF	9.93011	9.41267	10.1029
Cluster-118569.3	AP2/ERF-ERF	8.90409	9.22809	12.1065
Cluster-124279.8	AP2/ERF-ERF	0.852204	7.63366	6.25563
Cluster-124496.2	AP2/ERF-ERF	8.16798	11.1037	10.12
Cluster-124496.4	AP2/ERF-ERF	1.27129	6.03364	3.2416
Cluster-128076.119	AP2/ERF-ERF	7.76721	8.27104	10.9222
Cluster-129003.0	AP2/ERF-ERF	8.51175	7.66534	10.3623
Cluster-129003.5	AP2/ERF-ERF	8.81806	8.33043	10.0097
Cluster-133010.2	AP2/ERF-ERF	10.4665	8.78886	13.143
Cluster-111324.2	AP2/ERF-ERF	NA	1.92021	0.670801
Cluster-131025.2	AUX/IAA	2.45423	1.71279	2.39726
Cluster-112022.4	B3	7.59933	5.03024	4.80366
Cluster-118536.1	BES1	11.1072	10.3142	12.3148
Cluster-125434.2	bHLH	1.55188	2.0382	2.8357
Cluster-128779.8	bZIP	9.28851	10.2626	11.4749
Cluster-80318.0	bZIP	NA	1.53615	1.0774
Cluster-91114.2	bZIP	9.48672	8.88343	10.313
Cluster-36955.1	C2C2-Dof	7.1918	7.23811	8.2683
Cluster-83449.3	C2C2-Dof	5.09136	4.15215	3.16854
Cluster-27239.1	C2C2-GATA	8.48732	8.19266	11.1371
Cluster-65828.4	C2C2-GATA	8.74594	8.67288	4.6938
Cluster-77481.5	C2H2	7.67464	9.4079	12.1715
Cluster-77481.8	C2H2	NA	7.56592	10.2565
Cluster-27501.3	C3H	8.68	11.446	12.8546
Cluster-27501.7	C3H	6.47551	10.6503	7.18658
Cluster-49855.2	C3H	NA	7.32032	9.21099
Cluster-80152.0	FAR1	1.85385	1.85215	1.86928
Cluster-130982.5	GARP-G2-like	8.70027	9.78875	12.0759
Cluster-110113.1	GRAS	3.25958	7.47419	7.24236
Cluster-55469.9	GRAS	6.48406	10.9105	5.01585
Cluster-92252.6	GRAS	12.8041	13.4982	10.8049
Cluster-127803.2	HB-BELL	0.768108	1.43379	-0.83778
Cluster-124082.2	HB-KNOX	1.83424	2.15265	2.09764
Cluster-124082.3	HB-KNOX	10.2451	10.8535	11.4152
Cluster-82224.2	HB-KNOX	NA	10.4436	0.786892
Cluster-17119.7	HB-other	3.67158	5.07461	4.315
Cluster-17119.8	HB-other	-3.26064	-2.37459	-1.98066
Cluster-112832.2	HSF	8.51211	9.3283	10.3119
Cluster-104950.1	LOB	8.47751	7.70388	9.46992
Cluster-120078.2	LOB	10.1965	10.3328	11.8294
Cluster-132601.3	MADS-MIKC	4.84828	NA	0.520193
Cluster-46854.4	MYB-related	9.45061	9.04493	10.8977
Cluster-46854.8	MYB-related	10.3414	9.63508	11.8278
Cluster-118864.14	NAC	8.38726	5.78196	5.57792
Cluster-120346.3	NAC	-0.744606	2.75955	2.98723
Cluster-125054.4	NAC	4.2852	8.17864	5.67263
Cluster-71302.8	NAC	NA	NA	3.10267
Cluster-80672.0	NAC	4.43768	9.27596	6.27251
Cluster-123230.3	NF-YA	-2.15572	-0.127922	0.644467
Cluster-103094.5	Tify	0.54249	0.381978	2.09254
Cluster-67629.14	Tify	6.90373	NA	7.68365
Cluster-104363.5	WRKY	0.545601	1.75647	2.43914
Cluster-117034.0	WRKY	11.8941	11.7024	13.2775
Cluster-11740.103	WRKY	8.14267	9.75095	12.3366
Cluster-123171.1	WRKY	10.003	9.81614	11.9224
Cluster-133336.9	WRKY	9.06382	8.77	11.596
Cluster-15352.2	WRKY	8.47543	8.91037	10.1464
Cluster-26806.7	WRKY	5.4504	8.48079	9.63143
